# Supplementary material for: Cholesterol-lowering effects of oats induced by microbially produced phenolic metabolites
Source: Research Square preprint supplement (doi:10.21203/rs.3.rs-4188074/v1), 2024-07-16
Supplement: Supplementary file 1 [file 42c7de3c268f06694add901f.xlsx]

## Sheet: Legend
The tables show detail information on the pairwise correlations analyses (Pearson, Spearmann) between the change in TC and LDL and the change in features of the other data sets
Supplementary Table	Correlations with
S6-1	Plasma metabolites
S6-2	Fecal metabolites
S6-3	Microbial genera
S6-4	Microbial pathways
Supplementary Table S6-1 and Table S6-2
		Data key & chemical annotation descriptions
CHEM ID		Unique identifier for each biochemical.
Biochemical name		Name of the identified biochemical
	Biochemical name	Indicates a compound that has been confirmed based on an authentic chemical standard and we are highly confident in its identity. (Metabolomics Standards Initiative Tier 1 identification)
	Biochemical name*	Indicates a compound that has not been confirmed based on a standard, but we are confident in its identity. (Not Tier 1)
	Biochemical name**	Indicates a compound for which a standard is not available, but we are reasonably confident in its identity or the information provided. (Not Tier 1)
	Biochemical name (#) or [#]	Indicates a compound that is a structural isomer of another compound in the Metabolon spectral library. For example, a steroid that may be sulfated at one of several positions that are indistinguishable by the mass spectrometry data or a diacylglycerol for which more than one stereospecific molecule exists.
Super pathway		The general biochemical class assigned to the identified biochemical (e.g. lipid, amino acid, carbohydrate, etc.) intended for sorting compounds by broad biochemical classes
Sub-pathway		A more specific biochemical class assigned to the identified biochemical (e.g. TCA cycle, monoacylglycerols, etc.) intended for grouping/sorting compounds by biochemical pathway/class

## Sheet: Supplementary TableS6-1
				Pearson correlation			Spearman correlation			Response
CHEM_ID	Chemical name	Super pathway	Sub-pathway	r	P-value	q-value	r	P-value	q-value
100000042	3-methylhistidine	Amino Acid	Histidine Metabolism	0.627192	0.000122249	0.0550971	0.661168	3.79623e-05	0.0200136	LDL
100001550	homostachydrine*	Xenobiotics	Food Component/Plant	0.642812	7.267e-05	0.0550971	0.644304	6.90438e-05	0.0200136	LDL
100021478	1-methyl-5-imidazolelactate	Amino Acid	Histidine Metabolism	0.637621	0.000150676	0.0550971	0.679275	3.66795e-05	0.0200136	LDL
100002910	1-methyl-5-imidazoleacetate	Amino Acid	Histidine Metabolism	0.606447	0.000798518	0.0973305	0.688034	7.29758e-05	0.0200136	LDL
100015966	carotene diol (1)	Cofactors and Vitamins	Vitamin A Metabolism	0.505908	0.0031367	0.231613	0.630556	0.000109555	0.0240364	LDL
100003695	mannonate*	Xenobiotics	Food Component/Plant	0.571098	0.00064087	0.0973305	0.595729	0.000321489	0.058779	LDL
100009027	sphingomyelin (d18:0/18:0, d19:0/17:0)*	Lipid	Dihydrosphingomyelins	0.563289	0.000788732	0.0973305	0.590047	0.000378812	0.0593653	LDL
803	mannose	Carbohydrate	Fructose, Mannose and Galactose Metabolism	0.565457	0.000744937	0.0973305	0.573183	0.00060579	0.0786663	LDL
100015834	lignoceroylcarnitine (C24)*	Lipid	Fatty Acid Metabolism (Acyl Carnitine, Long Chain Saturated)	0.518618	0.00235806	0.198984	0.570617	0.000649223	0.0786663	LDL
100002204	N-acetyl-3-methylhistidine*	Amino Acid	Histidine Metabolism	0.599862	0.003167	0.231613	0.665726	0.000720413	0.0786663	LDL
100001026	galactonate	Carbohydrate	Fructose, Mannose and Galactose Metabolism	0.460881	0.00793822	0.312723	0.563285	0.000788814	0.0786663	LDL
100004299	N-acetyl-1-methylhistidine*	Amino Acid	Histidine Metabolism	0.563026	0.000975478	0.10701	0.567598	0.000867788	0.0793303	LDL
100001740	mannitol/sorbitol	Carbohydrate	Fructose, Mannose and Galactose Metabolism	0.424896	0.0153477	0.328052	0.545871	0.00123088	0.103867	LDL
100001468	N1-methyl-2-pyridone-5-carboxamide	Cofactors and Vitamins	Nicotinate and Nicotinamide Metabolism	0.498198	0.00371005	0.242519	0.541839	0.00135986	0.106555	LDL
100002284	2S,3R-dihydroxybutyrate	Lipid	Fatty Acid, Dihydroxy	0.565906	0.000736138	0.0973305	0.536156	0.00156161	0.107068	LDL
100015787	sphingomyelin (d18:1/19:0, d19:1/18:0)*	Lipid	Sphingomyelins	0.582887	0.000463824	0.0973305	0.536156	0.00156161	0.107068	LDL
1547	N-stearoyl-sphingosine (d18:1/18:0)*	Lipid	Ceramides	0.592553	0.000352502	0.224266	0.570015	0.000659803	0.116696	TC
100004299	N-acetyl-1-methylhistidine*	Amino Acid	Histidine Metabolism	0.585133	0.00054521	0.224266	0.5625	0.000988578	0.116696	TC
100009027	sphingomyelin (d18:0/18:0, d19:0/17:0)*	Lipid	Dihydrosphingomyelins	0.572728	0.000613306	0.224266	0.615103	0.000179429	0.116696	TC
100000042	3-methylhistidine	Amino Acid	Histidine Metabolism	0.537524	0.0015108	0.245773	0.573314	0.000603647	0.116696	TC
100001550	homostachydrine*	Xenobiotics	Food Component/Plant	0.544458	0.00127479	0.245773	0.561584	0.000824747	0.116696	TC
100015737	ceramide (d18:1/17:0, d17:1/18:0)*	Lipid	Ceramides	0.534906	0.00193306	0.245773	0.582661	0.000583052	0.116696	TC
100015834	lignoceroylcarnitine (C24)*	Lipid	Fatty Acid Metabolism (Acyl Carnitine, Long Chain Saturated)	0.527024	0.00194071	0.245773	0.551686	0.00106377	0.116696	TC
100021478	1-methyl-5-imidazolelactate	Amino Acid	Histidine Metabolism	0.513219	0.0037274	0.273416	0.595551	0.000516473	0.116696	TC
100001197	10-undecenoate (11:1n1)	Lipid	Medium Chain Fatty Acid	0.450796	0.00961583	0.351619	0.554252	0.0009966	0.116696	TC
100015966	carotene diol (1)	Cofactors and Vitamins	Vitamin A Metabolism	0.381356	0.031273	0.518989	0.556818	0.00093318	0.116696	TC
100021839	2-methoxyhydroquinone sulfate (1)	Xenobiotics	Benzoate Metabolism	-0.63793	0.00140205	0.139823	-0.610562	0.00254476	0.118784	LDL
100004542	2-aminoheptanoate	Lipid	Fatty Acid, Amino	-0.536856	0.00153542	0.140363	-0.521492	0.00220738	0.118784	LDL
100001755	4-vinylphenol sulfate	Xenobiotics	Benzoate Metabolism	-0.497597	0.00375827	0.242519	-0.517459	0.00242132	0.118784	LDL
1110	N-acetylalanine	Amino Acid	Alanine and Aspartate Metabolism	0.449799	0.00979684	0.312723	0.514343	0.00259875	0.118784	LDL
100001423	4-hydroxyhippurate	Xenobiotics	Benzoate Metabolism	-0.449036	0.00993743	0.312723	-0.529007	0.00185218	0.118784	LDL
100006115	arabonate/xylonate	Carbohydrate	Pentose Metabolism	0.446362	0.0104433	0.312723	0.522775	0.00214285	0.118784	LDL
100020975	3-hydroxy-2-methylpyridine sulfate	Xenobiotics	Chemical	0.572331	0.0324503	0.354129	0.740659	0.0024452	0.118784	LDL
100001197	10-undecenoate (11:1n1)	Lipid	Medium Chain Fatty Acid	0.342632	0.0548998	0.4275	0.523875	0.00208884	0.118784	LDL
100002910	1-methyl-5-imidazoleacetate	Amino Acid	Histidine Metabolism	0.495773	0.00854347	0.347118	0.589744	0.00120604	0.120275	TC
1114	3-aminoisobutyrate	Nucleotide	Pyrimidine Metabolism, Thymine containing	0.422412	0.0160227	0.328052	0.511411	0.00277592	0.12053	LDL
100001597	tiglylcarnitine (C5:1-DC)	Amino Acid	Leucine, Isoleucine and Valine Metabolism	0.430366	0.0139446	0.328052	0.510127	0.00285667	0.12053	LDL
1110	N-acetylalanine	Amino Acid	Alanine and Aspartate Metabolism	0.50923	0.00291436	0.266421	0.541789	0.00136152	0.124465	TC
100009026	behenoyl dihydrosphingomyelin (d18:0/22:0)*	Lipid	Dihydrosphingomyelins	0.425583	0.0151652	0.328052	0.500046	0.00356499	0.144844	LDL
100009038	myristoyl dihydrosphingomyelin (d18:0/14:0)*	Lipid	Dihydrosphingomyelins	0.407251	0.0207004	0.343851	0.490881	0.00433553	0.16986	LDL
100015832	behenoylcarnitine (C22)*	Lipid	Fatty Acid Metabolism (Acyl Carnitine, Long Chain Saturated)	0.420314	0.023195	0.343851	0.507452	0.00495646	0.187491	LDL
100016069	5-dodecenoylcarnitine (C12:1)	Lipid	Fatty Acid Metabolism (Acyl Carnitine, Monounsaturated)	0.44242	0.0126959	0.325076	0.48513	0.00567156	0.20739	LDL
803	mannose	Carbohydrate	Fructose, Mannose and Galactose Metabolism	0.523481	0.00210806	0.245773	0.51283	0.00268891	0.218156	TC
100004542	2-aminoheptanoate	Lipid	Fatty Acid, Amino	-0.545939	0.0012288	0.245773	-0.506232	0.00311442	0.218156	TC
100015787	sphingomyelin (d18:1/19:0, d19:1/18:0)*	Lipid	Sphingomyelins	0.516684	0.00246445	0.245773	0.498167	0.0037125	0.218156	TC
100020276	sphingomyelin (d17:1/14:0, d16:1/15:0)*	Lipid	Sphingomyelins	0.501851	0.00342805	0.273416	0.48827	0.00457967	0.218156	TC
100001468	N1-methyl-2-pyridone-5-carboxamide	Cofactors and Vitamins	Nicotinate and Nicotinamide Metabolism	0.483308	0.00507632	0.318483	0.484604	0.0049423	0.218156	TC
100006298	lignoceroyl sphingomyelin (d18:1/24:0)	Lipid	Sphingomyelins	0.483544	0.0050517	0.318483	0.480572	0.00536937	0.218156	TC
100001502	gamma-glutamyl-2-aminobutyrate	Peptide	Gamma-glutamyl Amino Acid	0.472612	0.0072578	0.33107	0.497581	0.00439735	0.218156	TC
100003695	mannonate*	Xenobiotics	Food Component/Plant	0.473	0.00625715	0.33107	0.493402	0.00411051	0.218156	TC
100005985	sphingomyelin (d18:2/14:0, d18:1/14:1)*	Lipid	Sphingomyelins	0.466971	0.00705083	0.33107	0.48937	0.00447544	0.218156	TC
100020496	sulfate of piperine metabolite C16H19NO3 (2)*	Xenobiotics	Food Component/Plant	0.50656	0.00594627	0.33107	0.52162	0.00441701	0.218156	TC
100001597	tiglylcarnitine (C5:1-DC)	Amino Acid	Leucine, Isoleucine and Valine Metabolism	0.453549	0.00913052	0.351619	0.500733	0.0035123	0.218156	TC
100021839	2-methoxyhydroquinone sulfate (1)	Xenobiotics	Benzoate Metabolism	-0.503566	0.016883	0.463016	-0.575381	0.00508327	0.218156	TC
100001026	galactonate	Carbohydrate	Fructose, Mannose and Galactose Metabolism	0.383173	0.0304108	0.518989	0.482771	0.00513267	0.218156	TC
100020975	3-hydroxy-2-methylpyridine sulfate	Xenobiotics	Chemical	0.498467	0.0696451	0.553628	0.70989	0.00445074	0.218156	TC
189	N6,N6,N6-trimethyllysine	Amino Acid	Lysine Metabolism	0.310539	0.0836581	0.588288	0.482405	0.00517148	0.218156	TC
100009026	behenoyl dihydrosphingomyelin (d18:0/22:0)*	Lipid	Dihydrosphingomyelins	0.373746	0.0351045	0.518989	0.478739	0.00557371	0.21837	TC
100020276	sphingomyelin (d17:1/14:0, d16:1/15:0)*	Lipid	Sphingomyelins	0.487023	0.00470033	0.286459	0.469435	0.00671676	0.237307	LDL
1547	N-stearoyl-sphingosine (d18:1/18:0)*	Lipid	Ceramides	0.44988	0.00978215	0.312723	0.461553	0.00783589	0.237307	LDL
100005985	sphingomyelin (d18:2/14:0, d18:1/14:1)*	Lipid	Sphingomyelins	0.458303	0.00834145	0.312723	0.464485	0.00740225	0.237307	LDL
100006298	lignoceroyl sphingomyelin (d18:1/24:0)	Lipid	Sphingomyelins	0.479751	0.00546005	0.312723	0.463202	0.00758939	0.237307	LDL
100006314	sphingomyelin (d17:1/16:0, d18:1/15:0, d16:1/17:0)*	Lipid	Sphingomyelins	0.462744	0.00765713	0.312723	0.464302	0.00742874	0.237307	LDL
100010941	linoleoyl-linoleoyl-glycerol (18:2/18:2) [1]*	Lipid	Diacylglycerol	-0.462672	0.00766783	0.312723	-0.467602	0.00696405	0.237307	LDL
100001251	decanoylcarnitine (C10)	Lipid	Fatty Acid Metabolism (Acyl Carnitine, Medium Chain)	0.430456	0.0139225	0.328052	0.460453	0.00800397	0.237307	LDL
893	arachidate (20:0)	Lipid	Long Chain Saturated Fatty Acid	0.468985	0.0102774	0.312723	0.480108	0.00839313	0.239021	LDL
100015737	ceramide (d18:1/17:0, d17:1/18:0)*	Lipid	Ceramides	0.400734	0.0254787	0.346325	0.464361	0.00849756	0.239021	LDL
100001162	propionylcarnitine (C3)	Lipid	Fatty Acid Metabolism (also BCAA Metabolism)	0.413924	0.0185187	0.338583	0.45532	0.00882944	0.242147	LDL
100020409	ascorbic acid 3-sulfate*	Cofactors and Vitamins	Ascorbate and Aldarate Metabolism	0.380999	0.0314449	0.354052	0.453121	0.00920468	0.246281	LDL
922	N-stearoyl-sphinganine (d18:0/18:0)*	Lipid	Dihydroceramides	0.373868	0.0350403	0.518989	0.469208	0.00674688	0.246711	TC
100001485	gamma-glutamylisoleucine*	Peptide	Gamma-glutamyl Amino Acid	0.331882	0.063496	0.545873	0.469208	0.00674688	0.246711	TC
100004523	N-delta-acetylornithine	Amino Acid	Urea cycle; Arginine and Proline Metabolism	0.403553	0.0219983	0.343851	0.450371	0.00969264	0.248047	LDL
100004575	N2,N5-diacetylornithine	Amino Acid	Urea cycle; Arginine and Proline Metabolism	0.409109	0.03064	0.354052	0.480088	0.00972288	0.248047	LDL
100020851	3-ethylcatechol sulfate (1)	Xenobiotics	Food Component/Plant	0.433172	0.0440301	0.374426	0.536572	0.0100378	0.25026	LDL
100015786	sphingomyelin (d18:0/20:0, d16:0/22:0)*	Lipid	Dihydrosphingomyelins	0.435434	0.0127422	0.325076	0.444872	0.0107344	0.255992	LDL
100006376	3-methoxycatechol sulfate (2)	Xenobiotics	Benzoate Metabolism	-0.459654	0.0207944	0.343851	-0.501635	0.0106241	0.255992	LDL
100001162	propionylcarnitine (C3)	Lipid	Fatty Acid Metabolism (also BCAA Metabolism)	0.349393	0.049984	0.518989	0.465543	0.00725103	0.256593	TC
100001277	10-nonadecenoate (19:1n9)	Lipid	Long Chain Monounsaturated Fatty Acid	0.459628	0.00813198	0.312723	0.443222	0.0110647	0.258255	LDL
100001469	N1-methyl-4-pyridone-3-carboxamide	Cofactors and Vitamins	Nicotinate and Nicotinamide Metabolism	0.505906	0.0137813	0.328052	0.513961	0.0121155	0.262313	LDL
100021467	pentose acid*	Partially Characterized Molecules	Partially Characterized Molecules	0.397895	0.0241132	0.346325	0.43919	0.0119085	0.262313	LDL
100004089	2-hydroxydecanoate	Lipid	Fatty Acid, Monohydroxy	-0.403119	0.027186	0.354052	-0.451441	0.0122762	0.262313	LDL
100001502	gamma-glutamyl-2-aminobutyrate	Peptide	Gamma-glutamyl Amino Acid	0.378313	0.0358606	0.364251	0.443593	0.0124342	0.262313	LDL
466	phytanate	Xenobiotics	Food Component/Plant	0.300029	0.0952404	0.481469	0.439556	0.0118296	0.262313	LDL
100004575	N2,N5-diacetylornithine	Amino Acid	Urea cycle; Arginine and Proline Metabolism	0.443614	0.0180507	0.471467	0.493158	0.00766339	0.26271	TC
100008920	sphingomyelin (d18:1/17:0, d17:1/18:0, d19:1/16:0)	Lipid	Sphingomyelins	0.452829	0.00925537	0.312723	0.434607	0.0129323	0.262718	LDL
100000781	hexanoylcarnitine (C6)	Lipid	Fatty Acid Metabolism (Acyl Carnitine, Medium Chain)	0.396144	0.0248006	0.346325	0.434791	0.01289	0.262718	LDL
100008917	1-(1-enyl-stearoyl)-2-oleoyl-GPC (P-18:0/18:1)	Lipid	Plasmalogen	0.421838	0.0161823	0.463016	0.459677	0.0081243	0.270071	TC
100004322	2-aminophenol sulfate	Xenobiotics	Food Component/Plant	-0.422179	0.0160873	0.328052	-0.431491	0.0136699	0.272653	LDL
100002204	N-acetyl-3-methylhistidine*	Amino Acid	Histidine Metabolism	0.476703	0.0248918	0.518989	0.546019	0.00856765	0.276433	TC
100020502	sulfate of piperine metabolite C18H21NO3 (1)*	Xenobiotics	Food Component/Plant	0.572252	0.0104574	0.312723	0.551119	0.0144565	0.283193	LDL
100008917	1-(1-enyl-stearoyl)-2-oleoyl-GPC (P-18:0/18:1)	Lipid	Plasmalogen	0.392692	0.0262033	0.346325	0.425626	0.0151541	0.287726	LDL
100020496	sulfate of piperine metabolite C16H19NO3 (2)*	Xenobiotics	Food Component/Plant	0.424479	0.0243605	0.346325	0.454085	0.0152125	0.287726	LDL
100002284	2S,3R-dihydroxybutyrate	Lipid	Fatty Acid, Dihydroxy	0.481896	0.00522579	0.318483	0.452713	0.00927577	0.290729	TC
922	N-stearoyl-sphinganine (d18:0/18:0)*	Lipid	Dihydroceramides	0.329549	0.0654939	0.444968	0.423609	0.0156943	0.291808	LDL
100000453	paraxanthine	Xenobiotics	Xanthine Metabolism	0.350493	0.0791828	0.454571	0.46743	0.0160511	0.293468	LDL
100006438	citraconate/glutaconate	Energy	TCA Cycle	0.356405	0.0532134	0.518989	0.463849	0.00982715	0.299455	TC
100015845	docosahexaenoylcarnitine (C22:6)*	Lipid	Fatty Acid Metabolism (Acyl Carnitine, Polyunsaturated)	0.360905	0.0424244	0.368369	0.41976	0.0167705	0.301594	LDL
100019966	3-hydroxyoleate*	Lipid	Fatty Acid, Monohydroxy	0.342183	0.0595338	0.440861	0.420809	0.0184072	0.325689	LDL
477	pristanate	Lipid	Fatty Acid, Branched	0.626231	0.0220278	0.343851	0.631868	0.020516	0.328148	LDL
1094	thyroxine	Amino Acid	Tyrosine Metabolism	0.400305	0.0231929	0.343851	0.409128	0.0200661	0.328148	LDL
100006262	4-methoxyphenol sulfate	Amino Acid	Tyrosine Metabolism	-0.435753	0.0426461	0.368369	-0.493081	0.0197148	0.328148	LDL
100009394	hexadecadienoate (16:2n6)	Lipid	Long Chain Polyunsaturated Fatty Acid (n3 and n6)	0.367015	0.0388021	0.368369	0.410045	0.0197624	0.328148	LDL
100019831	3-hydroxyphenylacetoylglutamine	Peptide	Acetylated Peptides	0.406449	0.0393526	0.368369	0.451359	0.0206401	0.328148	LDL
100004634	3-methoxytyramine sulfate	Amino Acid	Tyrosine Metabolism	0.336909	0.0739103	0.454571	0.430349	0.0197909	0.328148	LDL
100004112	3-methyl catechol sulfate (1)	Xenobiotics	Benzoate Metabolism	0.330313	0.0860286	0.471867	0.437936	0.0197634	0.328148	LDL
100006438	citraconate/glutaconate	Energy	TCA Cycle	0.363471	0.0483435	0.392836	0.418067	0.0215063	0.337035	LDL
100001594	beta-hydroxyisovaleroylcarnitine	Amino Acid	Leucine, Isoleucine and Valine Metabolism	0.416272	0.0177978	0.338583	0.40033	0.0231834	0.337216	LDL
235	2-hydroxyphenylacetate	Amino Acid	Phenylalanine Metabolism	-0.475387	0.021873	0.343851	-0.473931	0.0223383	0.337216	LDL
100001287	epiandrosterone sulfate	Lipid	Androgenic Steroids	0.380847	0.0315185	0.354052	0.400697	0.023046	0.337216	LDL
100021141	3-hydroxydecanoylcarnitine	Lipid	Fatty Acid Metabolism (Acyl Carnitine, Hydroxy)	0.381184	0.0313561	0.354052	0.401796	0.0226378	0.337216	LDL
100001977	beta-cryptoxanthin	Cofactors and Vitamins	Vitamin A Metabolism	0.347185	0.0515491	0.412769	0.399963	0.0233215	0.337216	LDL
100001925	cyclo(leu-pro)	Peptide	Dipeptide	0.31802	0.0867792	0.473616	0.412236	0.0235929	0.337216	LDL
100001485	gamma-glutamylisoleucine*	Peptide	Gamma-glutamyl Amino Acid	0.260464	0.149931	0.580209	0.399047	0.0236697	0.337216	LDL
100004295	2-piperidinone	Xenobiotics	Food Component/Plant	-0.414972	0.0181941	0.338583	-0.397397	0.0243072	0.338251	LDL
100001662	deoxycarnitine	Lipid	Carnitine Metabolism	0.375201	0.0343438	0.355469	0.396481	0.0246674	0.338251	LDL
100009002	1-(1-enyl-palmitoyl)-2-arachidonoyl-GPE (P-16:0/20:4)*	Lipid	Plasmalogen	0.376456	0.0336986	0.355469	0.396481	0.0246674	0.338251	LDL
100001051	1-methylhistidine	Amino Acid	Histidine Metabolism	0.437055	0.0123766	0.325076	0.390798	0.0269999	0.34242	LDL
100001247	octanoylcarnitine (C8)	Lipid	Fatty Acid Metabolism (Acyl Carnitine, Medium Chain)	0.406959	0.0208003	0.343851	0.394098	0.0256245	0.34242	LDL
100001392	laurylcarnitine (C12)	Lipid	Fatty Acid Metabolism (Acyl Carnitine, Medium Chain)	0.39423	0.0255704	0.346325	0.393364	0.0259251	0.34242	LDL
100009232	thioproline	Xenobiotics	Chemical	-0.394647	0.025401	0.346325	-0.392265	0.0263813	0.34242	LDL
100006190	2-acetamidophenol sulfate	Xenobiotics	Food Component/Plant	-0.43585	0.0294131	0.354052	-0.442777	0.0266529	0.34242	LDL
100021530	S-carboxyethylcysteine	Amino Acid	Methionine, Cysteine, SAM and Taurine Metabolism	0.331221	0.064057	0.441953	0.390615	0.027078	0.34242	LDL
100000846	erythritol	Xenobiotics	Food Component/Plant	0.253696	0.161194	0.591403	0.390432	0.0271563	0.34242	LDL
100001469	N1-methyl-4-pyridone-3-carboxamide	Cofactors and Vitamins	Nicotinate and Nicotinamide Metabolism	0.476644	0.0214777	0.501298	0.516798	0.0115696	0.343024	TC
100020536	4-ethylcatechol sulfate	Xenobiotics	Benzoate Metabolism	0.377756	0.0433466	0.371494	0.407686	0.0281451	0.343057	LDL
100006619	4-hydroxyphenylacetoylcarnitine	Amino Acid	Tyrosine Metabolism	-0.372992	0.0553373	0.4275	-0.423687	0.0276448	0.343057	LDL
100006116	methyl-4-hydroxybenzoate sulfate	Xenobiotics	Benzoate Metabolism	0.355382	0.0634715	0.441953	0.414945	0.0281175	0.343057	LDL
100020823	lithocholate sulfate (1)	Lipid	Secondary Bile Acid Metabolism	-0.706775	0.0101707	0.359911	-0.692308	0.012593	0.354219	TC
100015832	behenoylcarnitine (C22)*	Lipid	Fatty Acid Metabolism (Acyl Carnitine, Long Chain Saturated)	0.456621	0.0127762	0.412221	0.458128	0.0124468	0.354219	TC
2050	eicosapentaenoate (EPA; 20:5n3)	Lipid	Long Chain Polyunsaturated Fatty Acid (n3 and n6)	0.442027	0.0113094	0.318114	0.3831	0.0304451	0.354701	LDL
55	1-methylnicotinamide	Cofactors and Vitamins	Nicotinate and Nicotinamide Metabolism	0.420438	0.0165765	0.328052	0.377417	0.0332112	0.354701	LDL
100016019	1-palmitoyl-2-pentadecanoyl-GPC (16:0/15:0)*	Lipid	Phosphatidylcholine (PC)	0.406239	0.0210491	0.343851	0.382366	0.0307911	0.354701	LDL
100021990	3-hydroxyoctanoylcarnitine (1)	Lipid	Fatty Acid Metabolism (Acyl Carnitine, Hydroxy)	0.384153	0.0299536	0.354052	0.381267	0.0313161	0.354701	LDL
100004088	retinal	Cofactors and Vitamins	Vitamin A Metabolism	0.566004	0.0348693	0.357491	0.573626	0.0319708	0.354701	LDL
100009009	1-(1-enyl-palmitoyl)-2-linoleoyl-GPC (P-16:0/18:2)*	Lipid	Plasmalogen	0.360731	0.0425315	0.368369	0.382	0.0309653	0.354701	LDL
100002106	sphingomyelin (d18:1/18:1, d18:2/18:0)	Lipid	Sphingomyelins	0.344379	0.0578122	0.434384	0.386531	0.0317178	0.354701	LDL
100015745	glycosyl ceramide (d18:2/24:1, d18:1/24:2)*	Lipid	Hexosylceramides (HCER)	0.332894	0.0626441	0.441953	0.377967	0.0329349	0.354701	LDL
100001668	1-ribosyl-imidazoleacetate*	Amino Acid	Histidine Metabolism	-0.324575	0.0699168	0.449414	-0.380533	0.0316701	0.354701	LDL
100010966	1-palmityl-2-stearoyl-GPC (O-16:0/18:0)*	Lipid	Plasmalogen	0.325093	0.0694459	0.449414	0.37815	0.0328433	0.354701	LDL
100004328	sphingomyelin (d18:1/14:0, d16:1/16:0)*	Lipid	Sphingomyelins	0.314448	0.0796387	0.454571	0.377234	0.0333038	0.354701	LDL
100008955	tricosanoyl sphingomyelin (d18:1/23:0)*	Lipid	Sphingomyelins	0.297166	0.0985963	0.489539	0.379067	0.032388	0.354701	LDL
100001577	N-acetylcitrulline	Amino Acid	Urea cycle; Arginine and Proline Metabolism	0.27406	0.142775	0.567711	0.397375	0.0296706	0.354701	LDL
100001624	3-(3-hydroxyphenyl)propionate	Xenobiotics	Benzoate Metabolism	-0.425167	0.114138	0.508982	-0.55	0.0336554	0.354999	LDL
100009028	N-palmitoyl-sphinganine (d18:0/16:0)	Lipid	Dihydroceramides	0.270176	0.134781	0.557943	0.375218	0.0343353	0.358722	LDL
208	adenosine 5'-diphosphate (ADP)	Nucleotide	Purine Metabolism, Adenine containing	0.500035	0.0292449	0.354052	0.485301	0.0351848	0.362857	LDL
100021123	hydroxy-N6,N6,N6-trimethyllysine*	Amino Acid	Lysine Metabolism	0.323751	0.070672	0.449414	0.373201	0.0353926	0.362857	LDL
100006292	sphingomyelin (d18:1/20:1, d18:2/20:0)*	Lipid	Sphingomyelins	0.384044	0.0300041	0.354052	0.371918	0.036079	0.363107	LDL
100021991	3-hydroxyoctanoylcarnitine (2)	Lipid	Fatty Acid Metabolism (Acyl Carnitine, Hydroxy)	0.37863	0.0326044	0.354129	0.372102	0.0359803	0.363107	LDL
100001149	3-methylcrotonylglycine	Amino Acid	Leucine, Isoleucine and Valine Metabolism	-0.706	0.0069997	0.312723	-0.571429	0.0413423	0.370685	LDL
100001300	alpha-hydroxyisovalerate	Amino Acid	Leucine, Isoleucine and Valine Metabolism	0.448813	0.00997877	0.312723	0.366053	0.0393554	0.370685	LDL
100000987	2-linoleoylglycerol (18:2)	Lipid	Monoacylglycerol	-0.874318	0.0227014	0.343851	-0.828571	0.0415627	0.370685	LDL
100001412	N2,N2-dimethylguanosine	Nucleotide	Purine Metabolism, Guanine containing	0.401424	0.0227752	0.343851	0.36477	0.0401031	0.370685	LDL
100015962	N,N,N-trimethyl-5-aminovalerate	Amino Acid	Lysine Metabolism	0.410214	0.0197069	0.343851	0.366236	0.0392495	0.370685	LDL
100006620	nonanoylcarnitine (C9)	Lipid	Fatty Acid Metabolism (Acyl Carnitine, Medium Chain)	0.380618	0.0316291	0.354052	0.362387	0.041522	0.370685	LDL
100022517	1-oleyl-GPC (O-18:1)*	Lipid	Lysoplasmalogen	-0.383617	0.0302028	0.354052	-0.368802	0.037791	0.370685	LDL
100008928	2-hydroxybutyrate/2-hydroxyisobutyrate	Amino Acid	Glutathione Metabolism	0.379526	0.0321616	0.354129	0.364586	0.0402109	0.370685	LDL
1083	N-acetylmethionine	Amino Acid	Methionine, Cysteine, SAM and Taurine Metabolism	0.341747	0.0598799	0.440861	0.37161	0.0395536	0.370685	LDL
100006375	3-methoxycatechol sulfate (1)	Xenobiotics	Benzoate Metabolism	-0.346005	0.0770794	0.454571	-0.401099	0.0381231	0.370685	LDL
100006367	3-hydroxyhexanoate	Lipid	Fatty Acid, Monohydroxy	0.333684	0.0826837	0.461834	0.389163	0.0406722	0.370685	LDL
100009008	1-(1-enyl-palmitoyl)-2-docosahexaenoyl-GPC (P-16:0/22:6)*	Lipid	Plasmalogen	0.30084	0.0943051	0.481469	0.363303	0.0409716	0.370685	LDL
100015846	nervonoylcarnitine (C24:1)*	Lipid	Fatty Acid Metabolism (Acyl Carnitine, Monounsaturated)	0.290198	0.107139	0.500135	0.364403	0.0403188	0.370685	LDL
189	N6,N6,N6-trimethyllysine	Amino Acid	Lysine Metabolism	0.132076	0.471171	0.837212	0.368069	0.0382032	0.370685	LDL
100001423	4-hydroxyhippurate	Xenobiotics	Benzoate Metabolism	-0.384804	0.0296532	0.518989	-0.431452	0.0136795	0.37516	TC
100004182	3beta-hydroxy-5-cholenoate	Lipid	Secondary Bile Acid Metabolism	-0.54545	0.0157147	0.328052	-0.468421	0.0430934	0.375199	LDL
100015792	sphingomyelin (d18:1/25:0, d19:0/24:1, d20:1/23:0, d19:1/24:0)*	Lipid	Sphingomyelins	0.384676	0.0297122	0.354052	0.35982	0.0430949	0.375199	LDL
100021131	undecenoylcarnitine (C11:1)	Lipid	Fatty Acid Metabolism (Acyl Carnitine, Monounsaturated)	0.340025	0.0568944	0.430436	0.360737	0.0425278	0.375199	LDL
452	palmitoleate (16:1n7)	Lipid	Long Chain Monounsaturated Fatty Acid	0.316126	0.0779595	0.454571	0.358904	0.0436681	0.377196	LDL
100008903	1,2-dilinoleoyl-GPC (18:2/18:2)	Lipid	Phosphatidylcholine (PC)	-0.266337	0.140629	0.566862	-0.357071	0.0448327	0.384231	LDL
100004284	dimethyl sulfone	Xenobiotics	Chemical	-0.445824	0.0105476	0.312723	-0.355604	0.0457823	0.388997	LDL
100009014	1-(1-enyl-palmitoyl)-2-arachidonoyl-GPC (P-16:0/20:4)*	Lipid	Plasmalogen	0.365973	0.0394014	0.368369	0.352122	0.0481018	0.388997	LDL
100021136	3-decenoylcarnitine	Lipid	Fatty Acid Metabolism (Acyl Carnitine, Monounsaturated)	0.46228	0.0714105	0.449414	0.5	0.0485803	0.388997	LDL
100001988	5alpha-pregnan-3beta,20alpha-diol disulfate	Lipid	Progestin Steroids	0.389021	0.0813385	0.45994	0.436364	0.0479694	0.388997	LDL
100002568	L-urobilin	Cofactors and Vitamins	Hemoglobin and Porphyrin Metabolism	-0.405847	0.0947085	0.481469	-0.474961	0.0463901	0.388997	LDL
100015620	lactosyl-N-nervonoyl-sphingosine (d18:1/24:1)*	Lipid	Lactosylceramides (LCER)	0.30095	0.0941782	0.481469	0.352488	0.0478533	0.388997	LDL
1084	N-acetylvaline	Amino Acid	Leucine, Isoleucine and Valine Metabolism	0.298636	0.102703	0.495755	0.35931	0.0471218	0.388997	LDL
100000551	4-methyl-2-oxopentanoate	Amino Acid	Leucine, Isoleucine and Valine Metabolism	-0.235184	0.195066	0.637138	-0.351938	0.0482265	0.388997	LDL
100001806	o-cresol sulfate	Xenobiotics	Benzoate Metabolism	0.261287	0.228486	0.663632	0.416996	0.0477536	0.388997	LDL
273	cortisone	Lipid	Corticosteroids	0.39924	0.0288443	0.518989	0.440267	0.0149	0.389258	TC
100004634	3-methoxytyramine sulfate	Amino Acid	Tyrosine Metabolism	0.35833	0.0562987	0.518989	0.444828	0.0156129	0.389258	TC
100009028	N-palmitoyl-sphinganine (d18:0/16:0)	Lipid	Dihydroceramides	0.350653	0.0491079	0.518989	0.424853	0.0153591	0.389258	TC
100009038	myristoyl dihydrosphingomyelin (d18:0/14:0)*	Lipid	Dihydrosphingomyelins	0.373118	0.0354369	0.518989	0.42522	0.0152615	0.389258	TC
100009025	sphingomyelin (d18:1/21:0, d17:1/22:0, d16:1/23:0)*	Lipid	Sphingomyelins	0.363176	0.0410474	0.368369	0.350105	0.049487	0.391885	LDL
100006282	umbelliferone sulfate	Xenobiotics	Food Component/Plant	-0.273887	0.256516	0.690011	-0.45614	0.0496554	0.391885	LDL
100015833	arachidoylcarnitine (C20)*	Lipid	Fatty Acid Metabolism (Acyl Carnitine, Long Chain Saturated)	0.407522	0.0206079	0.343851	0.347722	0.0511647	0.393777	LDL
1342	3-methoxytyrosine	Amino Acid	Tyrosine Metabolism	-0.341381	0.0558501	0.428444	-0.348456	0.0506437	0.393777	LDL
100002927	S-methylcysteine sulfoxide	Amino Acid	Methionine, Cysteine, SAM and Taurine Metabolism	0.323869	0.0705634	0.449414	0.346989	0.0516899	0.393777	LDL
100000445	theobromine	Xenobiotics	Xanthine Metabolism	0.300452	0.106691	0.500135	0.359996	0.0506927	0.393777	LDL
1025	pipecolate	Amino Acid	Lysine Metabolism	0.251291	0.165338	0.591709	0.347173	0.0515582	0.393777	LDL
100002749	S-methylcysteine	Amino Acid	Methionine, Cysteine, SAM and Taurine Metabolism	0.276476	0.125573	0.533927	0.345706	0.0526193	0.398092	LDL
100020502	sulfate of piperine metabolite C18H21NO3 (1)*	Xenobiotics	Food Component/Plant	0.631402	0.0037386	0.273416	0.538596	0.0173506	0.400215	TC
100004523	N-delta-acetylornithine	Amino Acid	Urea cycle; Arginine and Proline Metabolism	0.420033	0.0166922	0.463016	0.416056	0.0178633	0.400215	TC
100015792	sphingomyelin (d18:1/25:0, d19:0/24:1, d20:1/23:0, d19:1/24:0)*	Lipid	Sphingomyelins	0.419397	0.016875	0.463016	0.406525	0.02095	0.400215	TC
100009008	1-(1-enyl-palmitoyl)-2-docosahexaenoyl-GPC (P-16:0/22:6)*	Lipid	Plasmalogen	0.405016	0.0214771	0.501298	0.411657	0.0192374	0.400215	TC
893	arachidate (20:0)	Lipid	Long Chain Saturated Fatty Acid	0.405715	0.0289896	0.518989	0.429064	0.0202023	0.400215	TC
1258	anthranilate	Amino Acid	Tryptophan Metabolism	0.385483	0.0322232	0.518989	0.414516	0.0204228	0.400215	TC
100001624	3-(3-hydroxyphenyl)propionate	Xenobiotics	Benzoate Metabolism	-0.569281	0.0267591	0.518989	-0.6	0.0180501	0.400215	TC
100006314	sphingomyelin (d17:1/16:0, d18:1/15:0, d16:1/17:0)*	Lipid	Sphingomyelins	0.394665	0.025394	0.518989	0.413123	0.01877	0.400215	TC
100006376	3-methoxycatechol sulfate (2)	Xenobiotics	Benzoate Metabolism	-0.408413	0.0426744	0.518989	-0.464615	0.0192871	0.400215	TC
100019966	3-hydroxyoleate*	Lipid	Fatty Acid, Monohydroxy	0.372788	0.0388835	0.518989	0.41371	0.0206938	0.400215	TC
100020578	4-allylcatechol sulfate	Xenobiotics	Benzoate Metabolism	-0.346605	0.0561071	0.518989	-0.41129	0.0215248	0.400215	TC
100021136	3-decenoylcarnitine	Lipid	Fatty Acid Metabolism (Acyl Carnitine, Monounsaturated)	0.499522	0.04883	0.518989	0.576471	0.0194151	0.400215	TC
100006262	4-methoxyphenol sulfate	Amino Acid	Tyrosine Metabolism	-0.404496	0.0618709	0.542979	-0.487295	0.0214339	0.400215	TC
100006375	3-methoxycatechol sulfate (1)	Xenobiotics	Benzoate Metabolism	-0.357151	0.0674227	0.547872	-0.449328	0.01871	0.400215	TC
100000551	4-methyl-2-oxopentanoate	Amino Acid	Leucine, Isoleucine and Valine Metabolism	-0.244783	0.176933	0.719363	-0.410557	0.0195943	0.400215	TC
100015846	nervonoylcarnitine (C24:1)*	Lipid	Fatty Acid Metabolism (Acyl Carnitine, Monounsaturated)	0.356035	0.0455019	0.518989	0.403592	0.021984	0.401941	TC
1004	xanthine	Nucleotide	Purine Metabolism, (Hypo)Xanthine/Inosine containing	0.4374	0.0123	0.325076	0.343323	0.0543805	0.404095	LDL
100000802	acetylcarnitine (C2)	Lipid	Fatty Acid Metabolism (Acyl Carnitine, Short Chain)	0.317953	0.0761631	0.454571	0.34314	0.0545178	0.404095	LDL
100015596	1-(1-enyl-stearoyl)-2-docosapentaenoyl-GPE (P-18:0/22:5n3)*	Lipid	Plasmalogen	0.30656	0.0879089	0.477406	0.344056	0.0538337	0.404095	LDL
100009364	phosphatidylcholine (18:0/20:2, 20:0/18:2)*	Lipid	Phosphatidylcholine (PC)	0.314891	0.0791926	0.454571	0.34259	0.0549316	0.40443	LDL
100006191	p-cresol glucuronide*	Amino Acid	Tyrosine Metabolism	-0.361519	0.0456839	0.376806	-0.347616	0.0553465	0.404768	LDL
100019801	3-hydroxyoleoylcarnitine	Lipid	Fatty Acid Metabolism (Acyl Carnitine, Hydroxy)	0.293017	0.103619	0.495755	0.341124	0.0560472	0.407178	LDL
1052	glycerate	Carbohydrate	Glycolysis, Gluconeogenesis, and Pyruvate Metabolism	0.38381	0.030113	0.354052	0.340574	0.0564702	0.407551	LDL
100015641	N-oleoylserine	Lipid	Endocannabinoid	0.470601	0.0075449	0.33107	0.403226	0.0244955	0.409091	TC
100021131	undecenoylcarnitine (C11:1)	Lipid	Fatty Acid Metabolism (Acyl Carnitine, Monounsaturated)	0.416801	0.0176389	0.471467	0.401393	0.0227868	0.409091	TC
100008955	tricosanoyl sphingomyelin (d18:1/23:0)*	Lipid	Sphingomyelins	0.345132	0.0530395	0.518989	0.396628	0.0246093	0.409091	TC
100015786	sphingomyelin (d18:0/20:0, d16:0/22:0)*	Lipid	Dihydrosphingomyelins	0.35028	0.0493656	0.518989	0.398094	0.0240362	0.409091	TC
100020851	3-ethylcatechol sulfate (1)	Xenobiotics	Food Component/Plant	0.356599	0.103305	0.600593	0.481649	0.0232257	0.409091	TC
828	arabinose	Carbohydrate	Pentose Metabolism	-0.314545	0.273387	0.763564	-0.595604	0.0246126	0.409091	TC
100001992	androstenediol (3beta,17beta) disulfate (1)	Lipid	Androgenic Steroids	-0.218775	0.26336	0.693767	-0.363487	0.0572604	0.410553	LDL
100001541	2-hydroxy-3-methylvalerate	Amino Acid	Leucine, Isoleucine and Valine Metabolism	0.181698	0.345519	0.758069	0.356448	0.0576996	0.411016	LDL
100006115	arabonate/xylonate	Carbohydrate	Pentose Metabolism	0.3598	0.0431075	0.518989	0.395161	0.0251936	0.411448	TC
100004112	3-methyl catechol sulfate (1)	Xenobiotics	Benzoate Metabolism	0.292929	0.130338	0.634587	0.421456	0.0255045	0.411448	TC
100002868	1-behenoyl-GPC (22:0)	Lipid	Lysophospholipid	-0.408157	0.0926655	0.481469	-0.454311	0.0582238	0.412074	LDL
100001051	1-methylhistidine	Amino Acid	Histidine Metabolism	0.389802	0.0274271	0.518989	0.392962	0.0260913	0.41457	TC
100001251	decanoylcarnitine (C10)	Lipid	Fatty Acid Metabolism (Acyl Carnitine, Medium Chain)	0.377056	0.0333936	0.518989	0.388563	0.0279655	0.41457	TC
100000453	paraxanthine	Xenobiotics	Xanthine Metabolism	0.361709	0.0694171	0.553628	0.431795	0.0276149	0.41457	TC
100015845	docosahexaenoylcarnitine (C22:6)*	Lipid	Fatty Acid Metabolism (Acyl Carnitine, Polyunsaturated)	0.304459	0.0902179	0.590312	0.390029	0.0273289	0.41457	TC
100020409	ascorbic acid 3-sulfate*	Cofactors and Vitamins	Ascorbate and Aldarate Metabolism	0.300124	0.0951304	0.595751	0.390029	0.0273289	0.41457	TC
100021123	hydroxy-N6,N6,N6-trimethyllysine*	Amino Acid	Lysine Metabolism	0.300302	0.0949242	0.595751	0.391862	0.0265499	0.41457	TC
100021329	(S)-a-amino-omega-caprolactam	Xenobiotics	Food Component/Plant	0.334461	0.0613429	0.441953	0.337091	0.0592076	0.416351	LDL
100002018	5alpha-androstan-3alpha,17beta-diol monosulfate (1)	Lipid	Androgenic Steroids	0.480082	0.00839722	0.312723	0.351275	0.061691	0.417127	LDL
100001253	N-acetylglutamine	Amino Acid	Glutamate Metabolism	0.375193	0.034348	0.355469	0.334891	0.0609897	0.417127	LDL
100006294	behenoyl sphingomyelin (d18:1/22:0)*	Lipid	Sphingomyelins	0.364617	0.0401925	0.368369	0.333792	0.0618964	0.417127	LDL
1254	glycerol	Lipid	Glycerolipid Metabolism	0.356943	0.0449152	0.375344	0.333975	0.0617445	0.417127	LDL
100006378	N-acetylkynurenine (2)	Amino Acid	Tryptophan Metabolism	0.353863	0.0550573	0.4275	0.345533	0.0614535	0.417127	LDL
100001232	5-dodecenoate (12:1n7)	Lipid	Medium Chain Fatty Acid	0.334929	0.0609591	0.441953	0.336358	0.059797	0.417127	LDL
100009078	1-oleoyl-2-linoleoyl-GPE (18:1/18:2)*	Lipid	Phosphatidylethanolamine (PE)	-0.255367	0.165591	0.591709	-0.339147	0.0619797	0.417127	LDL
100009009	1-(1-enyl-palmitoyl)-2-linoleoyl-GPC (P-16:0/18:2)*	Lipid	Plasmalogen	0.410893	0.0194846	0.497083	0.387097	0.0286142	0.417373	TC
1114	3-aminoisobutyrate	Nucleotide	Pyrimidine Metabolism, Thymine containing	0.337269	0.059065	0.531101	0.38563	0.0292751	0.417373	TC
100001988	5alpha-pregnan-3beta,20alpha-diol disulfate	Lipid	Progestin Steroids	0.368747	0.0999899	0.599393	0.475325	0.0294304	0.417373	TC
100001086	N-(2-furoyl)glycine	Xenobiotics	Food Component/Plant	0.346945	0.205176	0.730771	0.560714	0.0296765	0.417373	TC
100009053	palmitoleoyl-oleoyl-glycerol (16:1/18:1) [1]*	Lipid	Diacylglycerol	-0.421411	0.0402753	0.368369	-0.385301	0.062978	0.42063	LDL
100015851	docosapentaenoylcarnitine (C22:5n3)*	Lipid	Fatty Acid Metabolism (Acyl Carnitine, Polyunsaturated)	0.235546	0.218676	0.656145	0.349304	0.063267	0.42063	LDL
344	guanidinoacetate	Amino Acid	Creatine Metabolism	-0.282292	0.117493	0.516221	-0.330675	0.0645229	0.426395	LDL
231	arginine	Amino Acid	Urea cycle; Arginine and Proline Metabolism	-0.240457	0.184953	0.624691	-0.329026	0.0659483	0.433205	LDL
100001181	docosapentaenoate (n3 DPA; 22:5n3)	Lipid	Long Chain Polyunsaturated Fatty Acid (n3 and n6)	0.414206	0.0184308	0.338583	0.327376	0.0673982	0.434917	LDL
100006051	myristoleoylcarnitine (C14:1)*	Lipid	Fatty Acid Metabolism (Acyl Carnitine, Monounsaturated)	0.366648	0.0390121	0.368369	0.328109	0.0667507	0.434917	LDL
100001167	pro-hydroxy-pro	Amino Acid	Urea cycle; Arginine and Proline Metabolism	-0.30513	0.0950872	0.481469	-0.333098	0.0670875	0.434917	LDL
100001247	octanoylcarnitine (C8)	Lipid	Fatty Acid Metabolism (Acyl Carnitine, Medium Chain)	0.366279	0.0392246	0.518989	0.379399	0.0322244	0.436344	TC
100015745	glycosyl ceramide (d18:2/24:1, d18:1/24:2)*	Lipid	Hexosylceramides (HCER)	0.361046	0.0423378	0.518989	0.378666	0.0325867	0.436344	TC
100002106	sphingomyelin (d18:1/18:1, d18:2/18:0)	Lipid	Sphingomyelins	0.344728	0.0575422	0.526032	0.384677	0.0326164	0.436344	TC
100016069	5-dodecenoylcarnitine (C12:1)	Lipid	Fatty Acid Metabolism (Acyl Carnitine, Monounsaturated)	0.327067	0.0725008	0.561781	0.384677	0.0326164	0.436344	TC
100001668	1-ribosyl-imidazoleacetate*	Amino Acid	Histidine Metabolism	-0.37227	0.0358899	0.518989	-0.375367	0.0342582	0.440942	TC
100001755	4-vinylphenol sulfate	Xenobiotics	Benzoate Metabolism	-0.34455	0.0534681	0.518989	-0.373534	0.0352165	0.440942	TC
100000781	hexanoylcarnitine (C6)	Lipid	Fatty Acid Metabolism (Acyl Carnitine, Medium Chain)	0.327796	0.0670271	0.547872	0.375367	0.0342582	0.440942	TC
100021530	S-carboxyethylcysteine	Amino Acid	Methionine, Cysteine, SAM and Taurine Metabolism	0.304669	0.0899848	0.590312	0.374633	0.034639	0.440942	TC
100005391	3-(3-hydroxyphenyl)propionate sulfate	Xenobiotics	Benzoate Metabolism	-0.402878	0.0973819	0.596523	-0.498452	0.0352536	0.440942	TC
100001577	N-acetylcitrulline	Amino Acid	Urea cycle; Arginine and Proline Metabolism	0.223464	0.235212	0.742815	0.385539	0.0353718	0.440942	TC
100020819	glycoursodeoxycholic acid sulfate (1)	Lipid	Secondary Bile Acid Metabolism	-0.704176	0.00232688	0.245773	-0.523529	0.0374126	0.443162	TC
823	pyruvate	Carbohydrate	Glycolysis, Gluconeogenesis, and Pyruvate Metabolism	-0.346211	0.0522524	0.518989	-0.369135	0.0376051	0.443162	TC
2051	methylsuccinate	Amino Acid	Leucine, Isoleucine and Valine Metabolism	-0.349269	0.050071	0.518989	-0.368768	0.0378099	0.443162	TC
100004054	margaroylcarnitine (C17)*	Lipid	Fatty Acid Metabolism (Acyl Carnitine, Long Chain Saturated)	0.361835	0.0418559	0.518989	0.369135	0.0376051	0.443162	TC
100004089	2-hydroxydecanoate	Lipid	Fatty Acid, Monohydroxy	-0.409734	0.0245376	0.518989	-0.380645	0.0379738	0.443162	TC
100021141	3-hydroxydecanoylcarnitine	Lipid	Fatty Acid Metabolism (Acyl Carnitine, Hydroxy)	0.379306	0.03227	0.518989	0.369501	0.0374012	0.443162	TC
100002254	stearoyl ethanolamide	Lipid	Endocannabinoid	0.268697	0.137013	0.562935	0.325176	0.06937	0.445022	LDL
100015641	N-oleoylserine	Lipid	Endocannabinoid	0.400286	0.0256588	0.346325	0.329065	0.070671	0.448451	LDL
100002344	(12 or 13)-methylmyristate (a15:0 or i15:0)	Lipid	Fatty Acid, Branched	0.319399	0.0798659	0.454571	0.328864	0.070854	0.448451	LDL
100001086	N-(2-furoyl)glycine	Xenobiotics	Food Component/Plant	0.38531	0.156101	0.590481	0.478571	0.0711308	0.448451	LDL
1094	thyroxine	Amino Acid	Tyrosine Metabolism	0.379262	0.0322917	0.518989	0.366569	0.0390577	0.450497	TC
100000295	tartarate	Xenobiotics	Food Component/Plant	0.326828	0.0961239	0.595751	0.398657	0.0394236	0.450497	TC
100015790	sphingomyelin (d18:2/21:0, d16:2/23:0)*	Lipid	Sphingomyelins	0.389387	0.0276062	0.354052	0.32096	0.0732745	0.451585	LDL
100001579	2-hydroxypalmitate	Lipid	Fatty Acid, Monohydroxy	0.367282	0.0386496	0.368369	0.32151	0.0727558	0.451585	LDL
100009271	(S)-3-hydroxybutyrylcarnitine	Lipid	Fatty Acid Metabolism (Acyl Carnitine, Hydroxy)	0.354078	0.0467876	0.38303	0.321144	0.0731013	0.451585	LDL
100001126	gamma-glutamylvaline	Peptide	Gamma-glutamyl Amino Acid	0.192571	0.291002	0.717963	0.32206	0.0722399	0.451585	LDL
100015791	sphingomyelin (d18:2/23:1)*	Lipid	Sphingomyelins	0.3848	0.0296549	0.354052	0.319677	0.0744961	0.452815	LDL
100006295	sphingomyelin (d18:1/22:1, d18:2/22:0, d16:1/24:1)*	Lipid	Sphingomyelins	0.328557	0.0711333	0.449414	0.324831	0.0745918	0.452815	LDL
100021363	vanilloylglycine	Xenobiotics	Food Component/Plant	-0.325306	0.112565	0.50646	-0.362762	0.0747124	0.452815	LDL
100001170	3-hydroxy-2-ethylpropionate	Amino Acid	Leucine, Isoleucine and Valine Metabolism	0.374687	0.0712368	0.449414	0.369646	0.0754376	0.454698	LDL
100021162	palmitoyl-sphingosine-phosphoethanolamine (d18:1/16:0)	Lipid	Ceramide PEs	0.331619	0.0637182	0.441953	0.318211	0.0759115	0.455054	LDL
55	1-methylnicotinamide	Cofactors and Vitamins	Nicotinate and Nicotinamide Metabolism	0.460641	0.00797505	0.336486	0.36327	0.0409915	0.458106	TC
100001149	3-methylcrotonylglycine	Amino Acid	Leucine, Isoleucine and Valine Metabolism	-0.651462	0.0158559	0.463016	-0.571429	0.0413423	0.458106	TC
100015620	lactosyl-N-nervonoyl-sphingosine (d18:1/24:1)*	Lipid	Lactosylceramides (LCER)	0.295416	0.100692	0.600323	0.364003	0.0405552	0.458106	TC
100001277	10-nonadecenoate (19:1n9)	Lipid	Long Chain Monounsaturated Fatty Acid	0.347255	0.0514993	0.518989	0.355572	0.0458035	0.459605	TC
100001392	laurylcarnitine (C12)	Lipid	Fatty Acid Metabolism (Acyl Carnitine, Medium Chain)	0.37348	0.0352451	0.518989	0.360704	0.0425481	0.459605	TC
100002417	2,3-dihydroxyisovalerate	Xenobiotics	Food Component/Plant	0.386547	0.0383264	0.518989	0.370936	0.0475911	0.459605	TC
100009014	1-(1-enyl-palmitoyl)-2-arachidonoyl-GPC (P-16:0/20:4)*	Lipid	Plasmalogen	0.350254	0.0493838	0.518989	0.352273	0.0479994	0.459605	TC
100009042	5-hydroxyindole sulfate	Amino Acid	Tryptophan Metabolism	-0.498028	0.0300042	0.518989	-0.466667	0.0439877	0.459605	TC
100020546	N2-acetyl,N6-methyllysine	Amino Acid	Lysine Metabolism	0.345572	0.0527169	0.518989	0.361437	0.0420986	0.459605	TC
100015962	N,N,N-trimethyl-5-aminovalerate	Amino Acid	Lysine Metabolism	0.336209	0.0599169	0.534381	0.358871	0.0436887	0.459605	TC
231	arginine	Amino Acid	Urea cycle; Arginine and Proline Metabolism	-0.331407	0.0638988	0.545873	-0.354839	0.0462844	0.459605	TC
100001662	deoxycarnitine	Lipid	Carnitine Metabolism	0.327376	0.0673985	0.547872	0.355205	0.0460435	0.459605	TC
100000846	erythritol	Xenobiotics	Food Component/Plant	0.305677	0.088874	0.590312	0.357038	0.0448537	0.459605	TC
100021467	pentose acid*	Partially Characterized Molecules	Partially Characterized Molecules	0.301971	0.0930132	0.590312	0.352639	0.0477513	0.459605	TC
100006374	1,2,3-benzenetriol sulfate (2)	Xenobiotics	Chemical	-0.308388	0.0973112	0.596523	-0.367297	0.0458584	0.459605	TC
100009394	hexadecadienoate (16:2n6)	Lipid	Long Chain Polyunsaturated Fatty Acid (n3 and n6)	0.290607	0.106624	0.600593	0.35154	0.0484985	0.459605	TC
100010966	1-palmityl-2-stearoyl-GPC (O-16:0/18:0)*	Lipid	Plasmalogen	0.291546	0.105445	0.600593	0.352273	0.0479994	0.459605	TC
100001182	docosadienoate (22:2n6)	Lipid	Long Chain Polyunsaturated Fatty Acid (n3 and n6)	0.298927	0.12229	0.61563	0.376026	0.0486	0.459605	TC
1084	N-acetylvaline	Amino Acid	Leucine, Isoleucine and Valine Metabolism	0.263275	0.152429	0.67671	0.36371	0.0442926	0.459605	TC
100001405	1-methylxanthine	Xenobiotics	Xanthine Metabolism	-0.441399	0.201592	0.730395	-0.636364	0.0479117	0.459605	TC
100003119	N-oleoyltaurine	Lipid	Endocannabinoid	0.429664	0.0141185	0.328052	0.316745	0.0773476	0.460798	LDL
100002107	palmitoyl sphingomyelin (d18:1/16:0)	Lipid	Sphingomyelins	0.356556	0.0451644	0.375344	0.316378	0.0777099	0.460798	LDL
1342	3-methoxytyrosine	Amino Acid	Tyrosine Metabolism	-0.387819	0.0282933	0.518989	-0.35044	0.049255	0.461819	TC
100021502	(2 or 3)-decenoate (10:1n7 or n8)	Lipid	Medium Chain Fatty Acid	-0.459565	0.213298	0.739108	-0.666667	0.0498672	0.463596	TC
100008999	1-(1-enyl-stearoyl)-2-arachidonoyl-GPE (P-18:0/20:4)*	Lipid	Plasmalogen	0.301718	0.0933005	0.481469	0.314362	0.0797259	0.467697	LDL
100003915	palmitamide (16:0)	Lipid	Fatty Acid, Amide	0.286319	0.185339	0.624691	0.373116	0.0795034	0.467697	LDL
100019801	3-hydroxyoleoylcarnitine	Lipid	Fatty Acid Metabolism (Acyl Carnitine, Hydroxy)	0.320467	0.0737422	0.561781	0.34824	0.0507962	0.468264	TC
100015622	glycosyl-N-behenoyl-sphingosine (d18:1/22:0)*	Lipid	Hexosylceramides (HCER)	0.777951	0.039433	0.518989	0.75	0.0521814	0.469205	TC
100015836	ximenoylcarnitine (C26:1)*	Lipid	Fatty Acid Metabolism (Acyl Carnitine, Monounsaturated)	0.354591	0.0464478	0.518989	0.347141	0.051581	0.469205	TC
100006104	m-tyramine sulfate	Amino Acid	Tyrosine Metabolism	0.117475	0.801942	0.981311	0.75	0.0521814	0.469205	TC
100001083	indolepropionate	Amino Acid	Tryptophan Metabolism	0.376251	0.0338035	0.355469	0.313445	0.0806555	0.470633	LDL
100020414	6-bromotryptophan	Amino Acid	Tryptophan Metabolism	0.40112	0.0228881	0.343851	0.311979	0.0821602	0.474177	LDL
100000007	carnitine	Lipid	Carnitine Metabolism	0.363509	0.0408487	0.368369	0.311429	0.08273	0.474177	LDL
100021103	pregnenetriol sulfate*	Lipid	Pregnenolone Steroids	-0.288396	0.115631	0.511482	-0.317371	0.081907	0.474177	LDL
100006360	dopamine 4-sulfate	Amino Acid	Tyrosine Metabolism	-0.211997	0.26958	0.693767	-0.32738	0.0829917	0.474177	LDL
100001740	mannitol/sorbitol	Carbohydrate	Fructose, Mannose and Galactose Metabolism	0.208404	0.252362	0.74822	0.344941	0.0531796	0.474293	TC
100010924	palmitoyl-arachidonoyl-glycerol (16:0/20:4) [1]*	Lipid	Diacylglycerol	0.548282	0.0123145	0.412221	0.437594	0.0536614	0.474731	TC
100000665	docosahexaenoate (DHA; 22:6n3)	Lipid	Long Chain Polyunsaturated Fatty Acid (n3 and n6)	0.451419	0.00950409	0.312723	0.310146	0.0840714	0.476988	LDL
100009160	1-(1-enyl-palmitoyl)-2-palmitoleoyl-GPC (P-16:0/16:1)*	Lipid	Plasmalogen	0.419843	0.0167465	0.328052	0.30483	0.0898071	0.476988	LDL
100020819	glycoursodeoxycholic acid sulfate (1)	Lipid	Secondary Bile Acid Metabolism	-0.588813	0.0164076	0.328052	-0.444118	0.0848227	0.476988	LDL
340	glycine	Amino Acid	Glycine, Serine and Threonine Metabolism	-0.365394	0.0397378	0.368369	-0.306663	0.0877964	0.476988	LDL
100020825	3-hydroxyhexanoylcarnitine (1)	Lipid	Fatty Acid Metabolism (Acyl Carnitine, Hydroxy)	0.357235	0.0447272	0.375344	0.304097	0.0906211	0.476988	LDL
100001580	docosapentaenoate (n6 DPA; 22:5n6)	Lipid	Long Chain Polyunsaturated Fatty Acid (n3 and n6)	0.362261	0.0534588	0.421901	0.319212	0.0914347	0.476988	LDL
100006290	sphingomyelin (d18:1/20:0, d16:1/22:0)*	Lipid	Sphingomyelins	0.327474	0.0673112	0.449414	0.304097	0.0906211	0.476988	LDL
100000406	ribitol	Carbohydrate	Pentose Metabolism	0.315642	0.0784414	0.454571	0.300797	0.094354	0.476988	LDL
100003686	N-palmitoylglycine	Lipid	Fatty Acid Metabolism (Acyl Glycine)	0.3169	0.0771941	0.454571	0.309779	0.0844577	0.476988	LDL
100015836	ximenoylcarnitine (C26:1)*	Lipid	Fatty Acid Metabolism (Acyl Carnitine, Monounsaturated)	0.314639	0.0794458	0.454571	0.30373	0.0910302	0.476988	LDL
100020261	glutamine conjugate of C6H10O2 (1)*	Partially Characterized Molecules	Partially Characterized Molecules	0.314116	0.0799746	0.454571	0.308863	0.0854294	0.476988	LDL
100020497	sulfate of piperine metabolite C16H19NO3 (3)*	Xenobiotics	Food Component/Plant	0.31972	0.0850139	0.471011	0.311492	0.0938172	0.476988	LDL
100001570	1-linoleoyl-GPE (18:2)*	Lipid	Lysophospholipid	-0.305218	0.0893781	0.478282	-0.30483	0.0898071	0.476988	LDL
181	laurate (12:0)	Lipid	Medium Chain Fatty Acid	0.300313	0.0949123	0.481469	0.306296	0.0881958	0.476988	LDL
100015788	sphingomyelin (d18:2/18:1)*	Lipid	Sphingomyelins	0.298792	0.0966795	0.484281	0.30538	0.0892002	0.476988	LDL
111	3-hydroxyisobutyrate	Amino Acid	Leucine, Isoleucine and Valine Metabolism	0.302069	0.0986217	0.489539	0.310112	0.0895414	0.476988	LDL
100009122	1-pentadecanoyl-2-arachidonoyl-GPC (15:0/20:4)*	Lipid	Phosphatidylcholine (PC)	0.296057	0.09992	0.493749	0.30208	0.0928887	0.476988	LDL
1231	dihomo-linoleate (20:2n6)	Lipid	Long Chain Polyunsaturated Fatty Acid (n3 and n6)	0.294958	0.101246	0.495755	0.30428	0.090417	0.476988	LDL
100020824	lithocholic acid sulfate (2)	Lipid	Secondary Bile Acid Metabolism	-0.666362	0.102154	0.495755	-0.678571	0.0937503	0.476988	LDL
100020546	N2-acetyl,N6-methyllysine	Amino Acid	Lysine Metabolism	0.24986	0.167839	0.593935	0.302997	0.0918526	0.476988	LDL
100004227	2-aminooctanoate	Lipid	Fatty Acid, Amino	-0.244049	0.178276	0.613687	-0.30483	0.0898071	0.476988	LDL
100009406	palmitoleoylcarnitine (C16:1)*	Lipid	Fatty Acid Metabolism (Acyl Carnitine, Monounsaturated)	0.231393	0.202572	0.643223	0.307213	0.0872	0.476988	LDL
100001402	5-acetylamino-6-formylamino-3-methyluracil	Xenobiotics	Xanthine Metabolism	0.220519	0.225202	0.663476	0.301164	0.0939336	0.476988	LDL
100006104	m-tyramine sulfate	Amino Acid	Tyrosine Metabolism	0.360054	0.427591	0.812672	0.678571	0.0937503	0.476988	LDL
100002458	3-methylglutaconate	Amino Acid	Leucine, Isoleucine and Valine Metabolism	0.124002	0.498934	0.840764	0.306296	0.0881958	0.476988	LDL
891	margarate (17:0)	Lipid	Long Chain Saturated Fatty Acid	0.331316	0.0639763	0.441953	0.298964	0.0964778	0.478439	LDL
1489	palmitoyl ethanolamide	Lipid	Endocannabinoid	0.340858	0.0605914	0.441953	0.303256	0.0972389	0.478439	LDL
100001267	piperine	Xenobiotics	Food Component/Plant	0.325638	0.0689526	0.449414	0.297131	0.0986376	0.478439	LDL
100001007	ribonate	Carbohydrate	Pentose Metabolism	0.315215	0.0788678	0.454571	0.296765	0.099074	0.478439	LDL
339	glutarate (C5-DC)	Lipid	Fatty Acid, Dicarboxylate	-0.311936	0.0822042	0.461834	-0.300064	0.0951992	0.478439	LDL
100009124	1-margaroyl-2-arachidonoyl-GPC (17:0/20:4)*	Lipid	Phosphatidylcholine (PC)	0.3048	0.08984	0.47842	0.297131	0.0986376	0.478439	LDL
519	myristate (14:0)	Lipid	Long Chain Saturated Fatty Acid	0.302439	0.0924821	0.481469	0.298964	0.0964778	0.478439	LDL
100000841	oxalate (ethanedioate)	Cofactors and Vitamins	Ascorbate and Aldarate Metabolism	0.28716	0.111034	0.50646	0.296032	0.099951	0.478439	LDL
100001278	10-heptadecenoate (17:1n7)	Lipid	Long Chain Monounsaturated Fatty Acid	0.28636	0.112076	0.50646	0.296581	0.0992927	0.478439	LDL
100010922	linoleoyl-arachidonoyl-glycerol (18:2/20:4) [1]*	Lipid	Diacylglycerol	-0.261253	0.148656	0.580209	-0.299331	0.0960502	0.478439	LDL
1258	anthranilate	Amino Acid	Tryptophan Metabolism	0.255383	0.165564	0.591709	0.300635	0.100311	0.478439	LDL
100001257	N-acetylasparagine	Amino Acid	Alanine and Aspartate Metabolism	0.267311	0.186781	0.624691	0.329971	0.0997099	0.478439	LDL
100009005	1-(1-enyl-palmitoyl)-2-oleoyl-GPE (P-16:0/18:1)*	Lipid	Plasmalogen	0.0981515	0.593043	0.87573	0.296948	0.0988556	0.478439	LDL
100000015	xanthurenate	Amino Acid	Tryptophan Metabolism	0.280812	0.140057	0.566862	0.310345	0.10132	0.481159	LDL
100008956	sphingomyelin (d18:2/23:0, d18:1/23:1, d17:1/24:1)*	Lipid	Sphingomyelins	0.348634	0.050518	0.407487	0.293465	0.103067	0.483231	LDL
100001398	3,7-dimethylurate	Xenobiotics	Xanthine Metabolism	0.380962	0.118819	0.516221	0.397317	0.102535	0.483231	LDL
100021104	pregnenetriol disulfate*	Lipid	Pregnenolone Steroids	0.299266	0.155423	0.590481	0.34087	0.103099	0.483231	LDL
100006430	arabitol/xylitol	Carbohydrate	Pentose Metabolism	0.208255	0.25271	0.686195	0.293099	0.103518	0.483231	LDL
100004327	1-stearoyl-GPS (18:0)*	Lipid	Lysophospholipid	0.569682	0.0421103	0.368369	0.467676	0.107061	0.483675	LDL
100003258	2-O-methylascorbic acid	Cofactors and Vitamins	Ascorbate and Aldarate Metabolism	0.334014	0.061712	0.441953	0.287966	0.10999	0.483675	LDL
100002167	12-HETE	Lipid	Eicosanoid	0.616187	0.0772243	0.454571	0.569043	0.109804	0.483675	LDL
100009042	5-hydroxyindole sulfate	Amino Acid	Tryptophan Metabolism	-0.412615	0.0791487	0.454571	-0.383502	0.105053	0.483675	LDL
100000295	tartarate	Xenobiotics	Food Component/Plant	0.320117	0.10356	0.495755	0.314408	0.110218	0.483675	LDL
100001270	myristoylcarnitine (C14)	Lipid	Fatty Acid Metabolism (Acyl Carnitine, Long Chain Saturated)	0.279281	0.121627	0.519161	0.291632	0.105337	0.483675	LDL
100021000	hydroxypalmitoyl sphingomyelin (d18:1/16:0(OH))**	Lipid	Sphingomyelins	0.254635	0.159596	0.590481	0.291082	0.106026	0.483675	LDL
100004054	margaroylcarnitine (C17)*	Lipid	Fatty Acid Metabolism (Acyl Carnitine, Long Chain Saturated)	0.251432	0.165092	0.591709	0.288883	0.108813	0.483675	LDL
100006614	adipoylcarnitine (C6-DC)	Lipid	Fatty Acid Metabolism (Acyl Carnitine, Dicarboxylate)	0.247369	0.17226	0.605474	0.287783	0.110227	0.483675	LDL
100001501	oleoylcarnitine (C18:1)	Lipid	Fatty Acid Metabolism (Acyl Carnitine, Monounsaturated)	0.239767	0.186254	0.624691	0.291449	0.105566	0.483675	LDL
100003434	imidazole propionate	Amino Acid	Histidine Metabolism	-0.243944	0.186006	0.624691	-0.294183	0.108184	0.483675	LDL
100002027	androstenediol (3alpha, 17alpha) monosulfate (3)	Lipid	Androgenic Steroids	0.229938	0.205507	0.643223	0.290532	0.106717	0.483675	LDL
100001405	1-methylxanthine	Xenobiotics	Xanthine Metabolism	-0.371845	0.290035	0.717963	-0.539394	0.107593	0.483675	LDL
100001400	1-methylurate	Xenobiotics	Xanthine Metabolism	0.156219	0.401347	0.797604	0.294586	0.107679	0.483675	LDL
100005383	N-methylpipecolate	Xenobiotics	Bacterial/Fungal	0.149868	0.412963	0.801188	0.288516	0.109283	0.483675	LDL
100015637	2-hydroxybehenate	Lipid	Fatty Acid, Monohydroxy	0.189037	0.467445	0.911227	0.473039	0.0551445	0.483948	TC
100002458	3-methylglutaconate	Amino Acid	Leucine, Isoleucine and Valine Metabolism	0.1644	0.368585	0.872877	0.341276	0.0559308	0.486953	TC
235	2-hydroxyphenylacetate	Amino Acid	Phenylalanine Metabolism	-0.439267	0.0359826	0.518989	-0.403162	0.0564508	0.48761	TC
273	cortisone	Lipid	Corticosteroids	0.295993	0.112251	0.50646	0.294805	0.113769	0.493417	LDL
100008957	sphingomyelin (d18:2/24:1, d18:1/24:2)*	Lipid	Sphingomyelins	0.281107	0.119107	0.516221	0.285217	0.11358	0.493417	LDL
100015850	adrenoylcarnitine (C22:4)*	Lipid	Fatty Acid Metabolism (Acyl Carnitine, Polyunsaturated)	-0.285286	0.133586	0.555089	-0.300037	0.113796	0.493417	LDL
1538	stearoyl sphingomyelin (d18:1/18:0)	Lipid	Sphingomyelins	0.363777	0.0406895	0.368369	0.284667	0.114308	0.493685	LDL
100001022	threonate	Cofactors and Vitamins	Ascorbate and Aldarate Metabolism	0.260066	0.150577	0.580209	0.284117	0.11504	0.494897	LDL
100001391	stearoylcarnitine (C18)	Lipid	Fatty Acid Metabolism (Acyl Carnitine, Long Chain Saturated)	0.444178	0.0108724	0.313869	0.2832	0.116267	0.497338	LDL
823	pyruvate	Carbohydrate	Glycolysis, Gluconeogenesis, and Pyruvate Metabolism	-0.263932	0.144386	0.567711	-0.283017	0.116514	0.497338	LDL
100003473	alliin	Xenobiotics	Food Component/Plant	-0.435427	0.104749	0.495755	-0.421429	0.117699	0.500451	LDL
100001412	N2,N2-dimethylguanosine	Nucleotide	Purine Metabolism, Guanine containing	0.406623	0.0209162	0.501298	0.337977	0.0585019	0.50138	TC
100016019	1-palmitoyl-2-pentadecanoyl-GPC (16:0/15:0)*	Lipid	Phosphatidylcholine (PC)	0.325373	0.0691922	0.553628	0.337243	0.0590857	0.502458	TC
310	cystathionine	Amino Acid	Methionine, Cysteine, SAM and Taurine Metabolism	0.232029	0.225832	0.663476	0.296096	0.118856	0.503419	LDL
477	pristanate	Lipid	Fatty Acid, Branched	0.585947	0.0353461	0.518989	0.532967	0.0607365	0.504131	TC
1648	taurocholate	Lipid	Primary Bile Acid Metabolism	-0.393191	0.046906	0.518989	-0.371624	0.0615803	0.504131	TC
100021990	3-hydroxyoctanoylcarnitine (1)	Lipid	Fatty Acid Metabolism (Acyl Carnitine, Hydroxy)	0.398285	0.0239625	0.518989	0.335411	0.0605653	0.504131	TC
100006190	2-acetamidophenol sulfate	Xenobiotics	Food Component/Plant	-0.37571	0.064191	0.545873	-0.379231	0.0615381	0.504131	TC
100009364	phosphatidylcholine (18:0/20:2, 20:0/18:2)*	Lipid	Phosphatidylcholine (PC)	0.302237	0.0927106	0.590312	0.336144	0.05997	0.504131	TC
100015791	sphingomyelin (d18:2/23:1)*	Lipid	Sphingomyelins	0.342676	0.0548665	0.518989	0.333578	0.0620739	0.504408	TC
1083	N-acetylmethionine	Amino Acid	Methionine, Cysteine, SAM and Taurine Metabolism	0.235387	0.202408	0.730395	0.337903	0.0630043	0.508204	TC
100020866	dimethylguanidino valeric acid (DMGV)*	Amino Acid	Urea cycle; Arginine and Proline Metabolism	-0.418721	0.0588656	0.43929	-0.349351	0.120596	0.508823	LDL
100020343	tetradecadienoate (14:2)*	Lipid	Long Chain Polyunsaturated Fatty Acid (n3 and n6)	0.340368	0.0566292	0.430436	0.279168	0.121784	0.508916	LDL
1135	ursodeoxycholate	Lipid	Secondary Bile Acid Metabolism	-0.406425	0.149287	0.580209	-0.432967	0.12201	0.508916	LDL
100000014	hippurate	Xenobiotics	Benzoate Metabolism	0.101398	0.580811	0.871614	0.279534	0.121275	0.508916	LDL
100001586	gulonate*	Cofactors and Vitamins	Ascorbate and Aldarate Metabolism	0.259967	0.150738	0.580209	0.278435	0.122808	0.510303	LDL
100008980	1-stearoyl-2-linoleoyl-GPC (18:0/18:2)*	Lipid	Phosphatidylcholine (PC)	0.247092	0.172756	0.605474	0.278068	0.123322	0.510506	LDL
437	pelargonate (9:0)	Lipid	Medium Chain Fatty Acid	0.660173	0.0529701	0.421074	0.55	0.124977	0.515412	LDL
980	pentadecanoate (15:0)	Lipid	Long Chain Saturated Fatty Acid	0.281584	0.118456	0.516221	0.276052	0.126178	0.516484	LDL
100009222	1-linoleoyl-2-arachidonoyl-GPE (18:2/20:4)*	Lipid	Phosphatidylethanolamine (PE)	-0.236039	0.245695	0.67597	-0.307745	0.126162	0.516484	LDL
100020823	lithocholate sulfate (1)	Lipid	Secondary Bile Acid Metabolism	-0.451899	0.140254	0.566862	-0.46585	0.126919	0.517584	LDL
100009135	1-(1-enyl-stearoyl)-2-linoleoyl-GPC (P-18:0/18:2)*	Lipid	Plasmalogen	0.205529	0.259112	0.750615	0.330279	0.0648636	0.519382	TC
100001733	hexanoylglutamine	Lipid	Fatty Acid Metabolism (Acyl Glutamine)	0.285923	0.112649	0.50646	0.274219	0.128817	0.52338	LDL
100005466	N-acetyltaurine	Amino Acid	Methionine, Cysteine, SAM and Taurine Metabolism	0.203932	0.262913	0.693767	0.273852	0.12935	0.523605	LDL
100006108	phenylacetylcarnitine	Peptide	Acetylated Peptides	-0.264347	0.143732	0.567711	-0.272569	0.131227	0.52925	LDL
100006116	methyl-4-hydroxybenzoate sulfate	Xenobiotics	Benzoate Metabolism	0.301006	0.119588	0.61563	0.351396	0.0667117	0.53031	TC
100001073	androsterone sulfate	Lipid	Androgenic Steroids	0.292075	0.104785	0.495755	0.271836	0.132309	0.531658	LDL
445	orotate	Nucleotide	Pyrimidine Metabolism, Orotate containing	0.464058	0.00746407	0.312723	0.26927	0.136146	0.534752	LDL
100008933	3-hydroxystearate	Lipid	Fatty Acid, Monohydroxy	0.433839	0.0386142	0.368369	0.320158	0.136402	0.534752	LDL
100015838	eicosenoylcarnitine (C20:1)*	Lipid	Fatty Acid Metabolism (Acyl Carnitine, Monounsaturated)	0.323849	0.0705816	0.449414	0.270003	0.135041	0.534752	LDL
1869	2-hydroxyhippurate (salicylurate)	Xenobiotics	Benzoate Metabolism	-0.279118	0.12836	0.54158	-0.27402	0.135778	0.534752	LDL
100009139	1-myristoyl-2-arachidonoyl-GPC (14:0/20:4)*	Lipid	Phosphatidylcholine (PC)	0.229669	0.206052	0.643223	0.268903	0.1367	0.534752	LDL
100002417	2,3-dihydroxyisovalerate	Xenobiotics	Food Component/Plant	0.236167	0.217429	0.655359	0.284764	0.13433	0.534752	LDL
100001294	gamma-glutamylglycine	Peptide	Gamma-glutamyl Amino Acid	-0.170493	0.350853	0.76518	-0.26872	0.136978	0.534752	LDL
100009272	glycosyl-N-palmitoyl-sphingosine (d18:1/16:0)	Lipid	Hexosylceramides (HCER)	0.151573	0.407607	0.801188	0.270369	0.134491	0.534752	LDL
100001182	docosadienoate (22:2n6)	Lipid	Long Chain Polyunsaturated Fatty Acid (n3 and n6)	0.173714	0.37667	0.78848	0.287122	0.13849	0.538737	LDL
100020578	4-allylcatechol sulfate	Xenobiotics	Benzoate Metabolism	-0.204765	0.269163	0.693767	-0.271802	0.139101	0.5392	LDL
2051	methylsuccinate	Amino Acid	Leucine, Isoleucine and Valine Metabolism	-0.2628	0.146179	0.57271	-0.266703	0.140063	0.54102	LDL
100021992	cis-3,4-methyleneheptanoylglycine	Lipid	Fatty Acid Metabolism (Acyl Glycine)	-0.192467	0.367578	0.781458	-0.309633	0.140921	0.54242	LDL
100004284	dimethyl sulfone	Xenobiotics	Chemical	-0.393887	0.0257105	0.518989	-0.32588	0.0687346	0.54246	TC
100001925	cyclo(leu-pro)	Peptide	Dipeptide	0.330126	0.0748023	0.561781	0.335706	0.0697313	0.546395	TC
100010941	linoleoyl-linoleoyl-glycerol (18:2/18:2) [1]*	Lipid	Diacylglycerol	-0.358133	0.0441546	0.518989	-0.324047	0.0703998	0.54772	TC
100001404	indolebutyrate	Amino Acid	Tryptophan Metabolism	-0.486412	0.0918936	0.481469	-0.428571	0.143971	0.552226	LDL
100001300	alpha-hydroxyisovalerate	Amino Acid	Leucine, Isoleucine and Valine Metabolism	0.435509	0.0127252	0.412221	0.319282	0.0748762	0.554832	TC
100001882	glycosyl-N-stearoyl-sphingosine (d18:1/18:0)	Lipid	Hexosylceramides (HCER)	0.350945	0.0489063	0.518989	0.317082	0.0770152	0.554832	TC
100008928	2-hydroxybutyrate/2-hydroxyisobutyrate	Amino Acid	Glutathione Metabolism	0.351421	0.0485793	0.518989	0.319282	0.0748762	0.554832	TC
100015833	arachidoylcarnitine (C20)*	Lipid	Fatty Acid Metabolism (Acyl Carnitine, Long Chain Saturated)	0.362899	0.0412138	0.518989	0.321481	0.0727835	0.554832	TC
100015838	eicosenoylcarnitine (C20:1)*	Lipid	Fatty Acid Metabolism (Acyl Carnitine, Monounsaturated)	0.357903	0.0443007	0.518989	0.322214	0.0720961	0.554832	TC
100021991	3-hydroxyoctanoylcarnitine (2)	Lipid	Fatty Acid Metabolism (Acyl Carnitine, Hydroxy)	0.379876	0.0319905	0.518989	0.320748	0.073476	0.554832	TC
100008920	sphingomyelin (d18:1/17:0, d17:1/18:0, d19:1/16:0)	Lipid	Sphingomyelins	0.308541	0.0857727	0.590312	0.320381	0.0738241	0.554832	TC
100009002	1-(1-enyl-palmitoyl)-2-arachidonoyl-GPE (P-16:0/20:4)*	Lipid	Plasmalogen	0.30654	0.0879303	0.590312	0.317449	0.0766554	0.554832	TC
2050	eicosapentaenoate (EPA; 20:5n3)	Lipid	Long Chain Polyunsaturated Fatty Acid (n3 and n6)	0.299441	0.0959221	0.595751	0.31415	0.0799403	0.554832	TC
208	adenosine 5'-diphosphate (ADP)	Nucleotide	Purine Metabolism, Adenine containing	0.385438	0.103162	0.600593	0.414035	0.0780195	0.554832	TC
100006378	N-acetylkynurenine (2)	Amino Acid	Tryptophan Metabolism	0.300361	0.106803	0.600593	0.328142	0.0766723	0.554832	TC
100003686	N-palmitoylglycine	Lipid	Fatty Acid Metabolism (Acyl Glycine)	0.284622	0.114367	0.610589	0.319282	0.0748762	0.554832	TC
100001977	beta-cryptoxanthin	Cofactors and Vitamins	Vitamin A Metabolism	0.28342	0.115973	0.611646	0.314516	0.07957	0.554832	TC
100006367	3-hydroxyhexanoate	Lipid	Fatty Acid, Monohydroxy	0.299176	0.121963	0.61563	0.334975	0.0814293	0.554832	TC
100008903	1,2-dilinoleoyl-GPC (18:2/18:2)	Lipid	Phosphatidylcholine (PC)	-0.281335	0.118796	0.61563	-0.313416	0.0806848	0.554832	TC
100001501	oleoylcarnitine (C18:1)	Lipid	Fatty Acid Metabolism (Acyl Carnitine, Monounsaturated)	0.267362	0.13905	0.655598	0.314883	0.0792011	0.554832	TC
100020536	4-ethylcatechol sulfate	Xenobiotics	Benzoate Metabolism	0.228735	0.232675	0.741989	0.333005	0.0775337	0.554832	TC
100001126	gamma-glutamylvaline	Peptide	Gamma-glutamyl Amino Acid	0.216185	0.23468	0.742815	0.315249	0.0788335	0.554832	TC
466	phytanate	Xenobiotics	Food Component/Plant	0.205943	0.258135	0.750615	0.31305	0.081059	0.554832	TC
100001541	2-hydroxy-3-methylvalerate	Amino Acid	Leucine, Isoleucine and Valine Metabolism	0.185573	0.335152	0.837498	0.330542	0.0798888	0.554832	TC
100000276	maltotriose	Carbohydrate	Glycogen Metabolism	0.592745	0.01553	0.328052	0.381163	0.145216	0.555058	LDL
100001391	stearoylcarnitine (C18)	Lipid	Fatty Acid Metabolism (Acyl Carnitine, Long Chain Saturated)	0.451392	0.00950902	0.351619	0.311217	0.0829503	0.55682	TC
100001606	cholesterol sulfate	Lipid	Sterol	0.292633	0.104093	0.600593	0.311217	0.0829503	0.55682	TC
100006619	4-hydroxyphenylacetoylcarnitine	Amino Acid	Tyrosine Metabolism	-0.307092	0.119207	0.61563	-0.339438	0.0832439	0.55682	TC
2029	azelate (C9-DC)	Lipid	Fatty Acid, Dicarboxylate	-0.291199	0.118466	0.61563	-0.320578	0.0841337	0.559362	TC
100009153	1-stearoyl-2-meadoyl-GPC (18:0/20:3n9)*	Lipid	Phosphatidylcholine (PC)	0.350649	0.053112	0.518989	0.314113	0.085269	0.56012	TC
100006360	dopamine 4-sulfate	Amino Acid	Tyrosine Metabolism	-0.278339	0.14373	0.669251	-0.325123	0.0852626	0.56012	TC
100015622	glycosyl-N-behenoyl-sphingosine (d18:1/22:0)*	Lipid	Hexosylceramides (HCER)	0.724422	0.0655757	0.444968	0.607143	0.148231	0.561607	LDL
100009153	1-stearoyl-2-meadoyl-GPC (18:0/20:3n9)*	Lipid	Phosphatidylcholine (PC)	0.320813	0.0784666	0.454571	0.265753	0.148465	0.561607	LDL
100001606	cholesterol sulfate	Lipid	Sterol	0.212218	0.243589	0.67597	0.261571	0.148145	0.561607	LDL
100008985	1-palmitoyl-2-dihomo-linolenoyl-GPC (16:0/20:3n3 or 6)*	Lipid	Phosphatidylcholine (PC)	0.361023	0.0423519	0.368369	0.260471	0.14992	0.561615	LDL
100010924	palmitoyl-arachidonoyl-glycerol (16:0/20:4) [1]*	Lipid	Diacylglycerol	0.397152	0.0829364	0.461834	0.333835	0.150299	0.561615	LDL
100020262	glutamine conjugate of C6H10O2 (2)*	Partially Characterized Molecules	Partially Characterized Molecules	0.305759	0.088784	0.478282	0.260654	0.149623	0.561615	LDL
100006098	3-hydroxypyridine sulfate	Xenobiotics	Chemical	0.198393	0.276376	0.70011	0.260104	0.150515	0.561615	LDL
100002126	16alpha-hydroxy DHEA 3-sulfate	Lipid	Androgenic Steroids	-0.285116	0.113713	0.508982	-0.259555	0.151411	0.563042	LDL
100022005	bilirubin degradation product, C17H18N2O4 (1)**	Partially Characterized Molecules	Partially Characterized Molecules	0.511208	0.00642657	0.33107	0.332723	0.0899286	0.563105	TC
100006051	myristoleoylcarnitine (C14:1)*	Lipid	Fatty Acid Metabolism (Acyl Carnitine, Monounsaturated)	0.34152	0.0557438	0.518989	0.306452	0.0880265	0.563105	TC
100015688	1-stearoyl-2-(hydroxylinoleoyl)-GPC (18:0/18:2(OH))*	Lipid	Phosphatidylcholine (PC)	0.397496	0.029616	0.518989	0.314349	0.0906852	0.563105	TC
100015790	sphingomyelin (d18:2/21:0, d16:2/23:0)*	Lipid	Sphingomyelins	0.342424	0.0550568	0.518989	0.305718	0.0888281	0.563105	TC
100010918	oleoyl-oleoyl-glycerol (18:1/18:1) [1]*	Lipid	Diacylglycerol	0.308055	0.0862931	0.590312	0.304619	0.090041	0.563105	TC
100021329	(S)-a-amino-omega-caprolactam	Xenobiotics	Food Component/Plant	0.294791	0.101449	0.600593	0.305718	0.0888281	0.563105	TC
100001526	malonylcarnitine	Lipid	Fatty Acid Synthesis	-0.267633	0.145507	0.669251	-0.309274	0.0904563	0.563105	TC
100003397	trimethylamine N-oxide	Lipid	Phospholipid Metabolism	0.251723	0.164588	0.691773	0.303886	0.0908565	0.563105	TC
100002027	androstenediol (3alpha, 17alpha) monosulfate (3)	Lipid	Androgenic Steroids	0.248073	0.171002	0.713266	0.307185	0.0872305	0.563105	TC
482	lactate	Carbohydrate	Glycolysis, Gluconeogenesis, and Pyruvate Metabolism	-0.221207	0.22372	0.739108	-0.304985	0.0896353	0.563105	TC
100000672	1-myristoyl-2-palmitoyl-GPC (14:0/16:0)	Lipid	Phosphatidylcholine (PC)	0.28993	0.107479	0.600593	0.303152	0.0916777	0.564375	TC
811	alanine	Amino Acid	Alanine and Aspartate Metabolism	-0.279207	0.12173	0.61563	-0.302786	0.0920904	0.564375	TC
100020208	perfluorooctanoate (PFOA)	Xenobiotics	Chemical	0.280373	0.120115	0.516221	0.257905	0.154121	0.569262	LDL
100005834	9-hydroxystearate	Lipid	Fatty Acid, Monohydroxy	0.311439	0.278409	0.70011	0.402198	0.153974	0.569262	LDL
1648	taurocholate	Lipid	Primary Bile Acid Metabolism	-0.127338	0.535325	0.854715	-0.287229	0.154812	0.569895	LDL
100003434	imidazole propionate	Amino Acid	Histidine Metabolism	-0.343665	0.0583677	0.529168	-0.304435	0.0958805	0.579228	TC
100022013	tetrahydrocortisol glucuronide	Lipid	Corticosteroids	0.289634	0.107855	0.600593	0.298387	0.0971541	0.579228	TC
100002568	L-urobilin	Cofactors and Vitamins	Hemoglobin and Porphyrin Metabolism	-0.385166	0.114469	0.610589	-0.403509	0.0968097	0.579228	TC
100004322	2-aminophenol sulfate	Xenobiotics	Food Component/Plant	-0.277083	0.124711	0.61563	-0.298754	0.0967242	0.579228	TC
100002254	stearoyl ethanolamide	Lipid	Endocannabinoid	0.24135	0.183277	0.723217	0.299487	0.0958688	0.579228	TC
100020377	ethyl beta-glucopyranoside	Xenobiotics	Food Component/Plant	0.329233	0.100516	0.494465	0.284493	0.158955	0.581245	LDL
100010940	diacylglycerol (16:1/18:2 [2], 16:0/18:3 [1])*	Lipid	Diacylglycerol	-0.381547	0.178266	0.613687	-0.397802	0.158951	0.581245	LDL
179	9,10-DiHOME	Lipid	Fatty Acid, Dihydroxy	-0.505233	0.201551	0.643223	-0.547619	0.160026	0.583216	LDL
452	palmitoleate (16:1n7)	Lipid	Long Chain Monounsaturated Fatty Acid	0.266791	0.139928	0.655987	0.296921	0.098888	0.583227	TC
100005383	N-methylpipecolate	Xenobiotics	Bacterial/Fungal	0.199272	0.274212	0.763564	0.297287	0.0984524	0.583227	TC
340	glycine	Amino Acid	Glycine, Serine and Threonine Metabolism	-0.370337	0.0369395	0.518989	-0.295821	0.100204	0.5847	TC
111	3-hydroxyisobutyrate	Amino Acid	Leucine, Isoleucine and Valine Metabolism	0.243793	0.186285	0.725007	0.300806	0.100108	0.5847	TC
100001579	2-hydroxypalmitate	Lipid	Fatty Acid, Monohydroxy	0.275897	0.126399	0.619018	0.295088	0.101088	0.58674	TC
100009025	sphingomyelin (d18:1/21:0, d17:1/22:0, d16:1/23:0)*	Lipid	Sphingomyelins	0.287077	0.111142	0.606578	0.294355	0.101979	0.588793	TC
100001851	N-acetylserine	Amino Acid	Glycine, Serine and Threonine Metabolism	0.24493	0.176665	0.613687	0.253139	0.162147	0.588991	LDL
100020497	sulfate of piperine metabolite C16H19NO3 (3)*	Xenobiotics	Food Component/Plant	0.339011	0.0668563	0.547872	0.303671	0.102809	0.590479	TC
445	orotate	Nucleotide	Pyrimidine Metabolism, Orotate containing	0.467764	0.00694182	0.33107	0.291056	0.106059	0.591578	TC
100006641	glycochenodeoxycholate 3-sulfate	Lipid	Primary Bile Acid Metabolism	-0.52384	0.080452	0.57309	-0.48951	0.106252	0.591578	TC
100001270	myristoylcarnitine (C14)	Lipid	Fatty Acid Metabolism (Acyl Carnitine, Long Chain Saturated)	0.303074	0.0917665	0.590312	0.286657	0.111689	0.591578	TC
100006191	p-cresol glucuronide*	Amino Acid	Tyrosine Metabolism	-0.307215	0.0927359	0.590312	-0.291129	0.112068	0.591578	TC
100020204	N-acetyl-2-aminooctanoate*	Lipid	Fatty Acid, Amino	-0.306763	0.0876875	0.590312	-0.291789	0.105142	0.591578	TC
100021363	vanilloylglycine	Xenobiotics	Food Component/Plant	-0.343381	0.0928506	0.590312	-0.326154	0.111577	0.591578	TC
100021162	palmitoyl-sphingosine-phosphoethanolamine (d18:1/16:0)	Lipid	Ceramide PEs	0.287674	0.110368	0.605725	0.289223	0.108378	0.591578	TC
100001594	beta-hydroxyisovaleroylcarnitine	Amino Acid	Leucine, Isoleucine and Valine Metabolism	0.284403	0.114659	0.610589	0.290689	0.10652	0.591578	TC
100006620	nonanoylcarnitine (C9)	Lipid	Fatty Acid Metabolism (Acyl Carnitine, Medium Chain)	0.2846	0.114397	0.610589	0.28739	0.110735	0.591578	TC
100009139	1-myristoyl-2-arachidonoyl-GPC (14:0/20:4)*	Lipid	Phosphatidylcholine (PC)	0.27251	0.131314	0.634587	0.289956	0.107446	0.591578	TC
100000802	acetylcarnitine (C2)	Lipid	Fatty Acid Metabolism (Acyl Carnitine, Short Chain)	0.26314	0.14564	0.669251	0.291056	0.106059	0.591578	TC
100002167	12-HETE	Lipid	Eicosanoid	0.49127	0.17926	0.721863	0.566667	0.111633	0.591578	TC
100009406	palmitoleoylcarnitine (C16:1)*	Lipid	Fatty Acid Metabolism (Acyl Carnitine, Monounsaturated)	0.239257	0.18722	0.725727	0.288856	0.108847	0.591578	TC
100003470	pregnanediol-3-glucuronide	Lipid	Progestin Steroids	0.224611	0.241436	0.742815	0.306897	0.105373	0.591578	TC
100015596	1-(1-enyl-stearoyl)-2-docosapentaenoyl-GPE (P-18:0/22:5n3)*	Lipid	Plasmalogen	0.190964	0.295123	0.793505	0.28629	0.112168	0.591578	TC
100001992	androstenediol (3beta,17beta) disulfate (1)	Lipid	Androgenic Steroids	-0.16787	0.393178	0.889313	-0.308155	0.110631	0.591578	TC
100000011	phenylacetate	Amino Acid	Phenylalanine Metabolism	-0.169846	0.500448	0.912991	-0.391125	0.1085	0.591578	TC
100001989	glycocholenate sulfate*	Lipid	Secondary Bile Acid Metabolism	-0.421733	0.0721029	0.449414	-0.331579	0.165502	0.592989	LDL
100010850	4-hydroxyphenylacetylglutamine	Peptide	Acetylated Peptides	-0.315808	0.0891179	0.478282	-0.260541	0.16436	0.592989	LDL
888	caprate (10:0)	Lipid	Medium Chain Fatty Acid	0.232247	0.200866	0.643223	0.250939	0.16595	0.592989	LDL
100000011	phenylacetate	Amino Acid	Phenylalanine Metabolism	-0.151677	0.54797	0.854715	-0.341589	0.165335	0.592989	LDL
100009225	1-(1-enyl-stearoyl)-2-linoleoyl-GPE (P-18:0/18:2)*	Lipid	Plasmalogen	0.0811401	0.658876	0.899365	0.251306	0.165312	0.592989	LDL
100020208	perfluorooctanoate (PFOA)	Xenobiotics	Chemical	0.321719	0.0725598	0.561781	0.285191	0.113614	0.596339	TC
100001417	phenylacetylglutamine	Peptide	Acetylated Peptides	-0.234804	0.19581	0.637138	-0.24929	0.168845	0.601372	LDL
100001287	epiandrosterone sulfate	Lipid	Androgenic Steroids	0.20069	0.270741	0.763511	0.283358	0.116056	0.603381	TC
100001806	o-cresol sulfate	Xenobiotics	Benzoate Metabolism	0.119018	0.588585	0.923257	0.336957	0.115892	0.603381	TC
100002259	cis-4-decenoylcarnitine (C10:1)	Lipid	Fatty Acid Metabolism (Acyl Carnitine, Monounsaturated)	0.315918	0.0781667	0.454571	0.248373	0.170468	0.604751	LDL
100022013	tetrahydrocortisol glucuronide	Lipid	Corticosteroids	0.267842	0.138315	0.566164	0.247823	0.171447	0.604751	LDL
100015637	2-hydroxybehenate	Lipid	Fatty Acid, Monohydroxy	0.117685	0.652829	0.898764	0.348039	0.171013	0.604751	LDL
100004088	retinal	Cofactors and Vitamins	Vitamin A Metabolism	0.417582	0.137371	0.655202	0.437363	0.117845	0.606929	TC
100000743	2-hydroxyoctanoate	Lipid	Fatty Acid, Monohydroxy	0.420592	0.197718	0.730395	0.5	0.117307	0.606929	TC
100009036	1-margaroyl-2-oleoyl-GPC (17:0/18:1)*	Lipid	Phosphatidylcholine (PC)	0.342127	0.0552819	0.518989	0.280792	0.11954	0.607106	TC
100000776	palmitoylcarnitine (C16)	Lipid	Fatty Acid Metabolism (Acyl Carnitine, Long Chain Saturated)	0.277415	0.124241	0.61563	0.281158	0.119037	0.607106	TC
100004227	2-aminooctanoate	Lipid	Fatty Acid, Amino	-0.262268	0.147028	0.669251	-0.280792	0.11954	0.607106	TC
100003151	linoleoylcarnitine (C18:2)*	Lipid	Fatty Acid Metabolism (Acyl Carnitine, Polyunsaturated)	-0.189982	0.297661	0.721383	-0.24709	0.172759	0.607425	LDL
100020410	3-hydroxyhippurate sulfate	Xenobiotics	Benzoate Metabolism	-0.321812	0.307697	0.728567	-0.41958	0.174519	0.607769	LDL
100001393	isovalerylcarnitine (C5)	Amino Acid	Leucine, Isoleucine and Valine Metabolism	-0.123501	0.500682	0.841114	-0.246174	0.174409	0.607769	LDL
100015684	myristoyl-linoleoyl-glycerol (14:0/18:2) [2]*	Lipid	Diacylglycerol	-0.177038	0.624641	0.888916	-0.466667	0.173939	0.607769	LDL
229	arachidonate (20:4n6)	Lipid	Long Chain Polyunsaturated Fatty Acid (n3 and n6)	0.392954	0.0260946	0.346325	0.244341	0.177742	0.613351	LDL
100005714	1-linolenoyl-GPE (18:3)*	Lipid	Lysophospholipid	-0.289854	0.159886	0.590481	-0.278515	0.177615	0.613351	LDL
100009227	1-linoleoyl-GPG (18:2)*	Lipid	Lysophospholipid	-0.235184	0.210914	0.643735	-0.252753	0.177799	0.613351	LDL
100009021	1-palmityl-2-arachidonoyl-GPC (O-16:0/20:4)*	Lipid	Plasmalogen	0.322262	0.072051	0.449414	0.243057	0.180102	0.613918	LDL
100001323	fibrinopeptide A, des-ala(1)*	Peptide	Fibrinogen Cleavage Peptide	0.546135	0.102417	0.495755	0.462008	0.178857	0.613918	LDL
100000765	levulinate (4-oxovalerate)	Xenobiotics	Food Component/Plant	0.56779	0.183631	0.624691	0.571429	0.180202	0.613918	LDL
100020407	enterolactone sulfate	Xenobiotics	Food Component/Plant	-0.513461	0.238528	0.670938	-0.571429	0.180202	0.613918	LDL
100006294	behenoyl sphingomyelin (d18:1/22:0)*	Lipid	Sphingomyelins	0.291371	0.105664	0.600593	0.279326	0.121565	0.614547	TC
100020414	6-bromotryptophan	Amino Acid	Tryptophan Metabolism	0.343774	0.054044	0.518989	0.278592	0.122587	0.616871	TC
100000015	xanthurenate	Amino Acid	Tryptophan Metabolism	0.257745	0.177054	0.719363	0.292611	0.123467	0.618464	TC
100008989	1-palmitoyl-2-eicosapentaenoyl-GPC (16:0/20:5)*	Lipid	Phosphatidylcholine (PC)	0.377891	0.032973	0.354622	0.241224	0.183511	0.62025	LDL
100001739	dihomo-linolenate (20:3n3 or n6)	Lipid	Long Chain Polyunsaturated Fatty Acid (n3 and n6)	0.322294	0.0720218	0.449414	0.240491	0.184888	0.62025	LDL
100008914	1-palmitoyl-2-arachidonoyl-GPC (16:0/20:4n6)	Lipid	Phosphatidylcholine (PC)	0.291724	0.105223	0.495755	0.240675	0.184543	0.62025	LDL
100021712	deoxycholic acid 12-sulfate*	Lipid	Secondary Bile Acid Metabolism	-0.436596	0.279461	0.70011	-0.52381	0.182721	0.62025	LDL
100002026	androstenediol (3alpha, 17alpha) monosulfate (2)	Lipid	Androgenic Steroids	0.172902	0.343986	0.758069	0.241041	0.183855	0.62025	LDL
100006271	ethylparaben sulfate	Xenobiotics	Chemical	0.747683	0.0205458	0.501298	0.55	0.124977	0.62036	TC
1489	palmitoyl ethanolamide	Lipid	Endocannabinoid	0.350962	0.0528855	0.518989	0.281855	0.124502	0.62036	TC
100008956	sphingomyelin (d18:2/23:0, d18:1/23:1, d17:1/24:1)*	Lipid	Sphingomyelins	0.318863	0.0752797	0.561781	0.27566	0.126739	0.620683	TC
100002367	2R,3R-dihydroxybutyrate	Lipid	Fatty Acid, Dihydroxy	0.26139	0.148437	0.672248	0.27566	0.126739	0.620683	TC
100002344	(12 or 13)-methylmyristate (a15:0 or i15:0)	Lipid	Fatty Acid, Branched	0.206116	0.265948	0.761465	0.281048	0.12563	0.620683	TC
100019884	trans-2-hexenoylglycine	Lipid	Fatty Acid Metabolism (Acyl Glycine)	-0.323704	0.280623	0.769609	-0.445055	0.127524	0.62175	TC
100022127	tetrahydrocortisone glucuronide (5)	Lipid	Corticosteroids	0.225575	0.214476	0.739108	0.274194	0.128854	0.622861	TC
100002544	4-hydroxyglutamate	Amino Acid	Glutamate Metabolism	0.182703	0.404053	0.892748	0.326087	0.128887	0.622861	TC
100021103	pregnenetriol sulfate*	Lipid	Pregnenolone Steroids	-0.205863	0.266548	0.761465	-0.278226	0.129635	0.623728	TC
100009227	1-linoleoyl-GPG (18:2)*	Lipid	Lysophospholipid	-0.316702	0.0881663	0.590312	-0.282314	0.130653	0.625881	TC
100000900	iminodiacetate (IDA)	Xenobiotics	Chemical	0.145699	0.426227	0.811755	0.238842	0.188011	0.628805	LDL
100009036	1-margaroyl-2-oleoyl-GPC (17:0/18:1)*	Lipid	Phosphatidylcholine (PC)	0.332046	0.0633568	0.441953	0.238292	0.18906	0.630393	LDL
100001232	5-dodecenoate (12:1n7)	Lipid	Medium Chain Fatty Acid	0.3019	0.0930939	0.590312	0.270894	0.133707	0.634024	TC
100019831	3-hydroxyphenylacetoylglutamine	Peptide	Acetylated Peptides	0.301151	0.134912	0.646282	0.302564	0.133001	0.634024	TC
100021992	cis-3,4-methyleneheptanoylglycine	Lipid	Fatty Acid Metabolism (Acyl Glycine)	-0.270669	0.200808	0.730395	-0.314783	0.134087	0.634024	TC
100002154	ergothioneine	Xenobiotics	Food Component/Plant	-0.325318	0.0692414	0.449414	-0.22931	0.206781	0.636952	LDL
100015688	1-stearoyl-2-(hydroxylinoleoyl)-GPC (18:0/18:2(OH))*	Lipid	Phosphatidylcholine (PC)	0.319254	0.0854959	0.471301	0.242964	0.195766	0.636952	LDL
100001527	hexanoylglycine	Lipid	Fatty Acid Metabolism (Acyl Glycine)	-0.501868	0.0964073	0.484281	-0.391608	0.208063	0.636952	LDL
100001337	linolenate [alpha or gamma; (18:3n3 or 6)]	Lipid	Long Chain Polyunsaturated Fatty Acid (n3 and n6)	0.280741	0.119609	0.516221	0.232426	0.200508	0.636952	LDL
439	stearate (18:0)	Lipid	Long Chain Saturated Fatty Acid	0.273391	0.130023	0.544266	0.22821	0.209027	0.636952	LDL
100001882	glycosyl-N-stearoyl-sphingosine (d18:1/18:0)	Lipid	Hexosylceramides (HCER)	0.273075	0.130485	0.544266	0.236459	0.192588	0.636952	LDL
100001314	gamma-glutamylthreonine	Peptide	Gamma-glutamyl Amino Acid	0.255436	0.158243	0.590481	0.229127	0.207154	0.636952	LDL
100002945	(14 or 15)-methylpalmitate (a17:0 or i17:0)	Lipid	Fatty Acid, Branched	0.251145	0.165592	0.591709	0.228577	0.208276	0.636952	LDL
100005376	1-eicosenoyl-GPE (20:1)*	Lipid	Lysophospholipid	0.624342	0.185172	0.624691	0.6	0.208	0.636952	LDL
100001569	1-oleoyl-GPE (18:1)	Lipid	Lysophospholipid	-0.233664	0.198053	0.637138	-0.22876	0.207902	0.636952	LDL
100020491	glucuronide of piperine metabolite C17H21NO3 (3)*	Xenobiotics	Food Component/Plant	0.319195	0.196668	0.637138	0.318885	0.197128	0.636952	LDL
100001335	eicosenoate (20:1)	Lipid	Long Chain Monounsaturated Fatty Acid	0.229092	0.207224	0.643223	0.230226	0.204922	0.636952	LDL
100021667	branched-chain, straight-chain, or cyclopropyl 10:1 fatty acid (2)*	Partially Characterized Molecules	Partially Characterized Molecules	-0.433052	0.211253	0.643735	-0.44985	0.192076	0.636952	LDL
815	tyrosine	Amino Acid	Tyrosine Metabolism	-0.221729	0.222603	0.663476	-0.234259	0.19688	0.636952	LDL
100000776	palmitoylcarnitine (C16)	Lipid	Fatty Acid Metabolism (Acyl Carnitine, Long Chain Saturated)	0.220117	0.22607	0.663476	0.230593	0.204182	0.636952	LDL
100002196	13-HODE + 9-HODE	Lipid	Fatty Acid, Monohydroxy	-0.327604	0.233269	0.669884	-0.346429	0.205896	0.636952	LDL
100001567	1-palmitoyl-GPE (16:0)	Lipid	Lysophospholipid	-0.21488	0.237587	0.670938	-0.232426	0.200508	0.636952	LDL
100006370	3beta-hydroxy-5-cholestenoate	Lipid	Sterol	0.21113	0.246069	0.67597	0.232609	0.200143	0.636952	LDL
100001767	pyrraline	Xenobiotics	Food Component/Plant	0.328457	0.251563	0.684775	0.358242	0.208498	0.636952	LDL
1528	1-palmitoyl-2-linoleoyl-GPI (16:0/18:2)	Lipid	Phosphatidylinositol (PI)	-0.203881	0.263036	0.693767	-0.230593	0.204182	0.636952	LDL
100009162	1-(1-enyl-palmitoyl)-2-palmitoyl-GPC (P-16:0/16:0)*	Lipid	Plasmalogen	0.201052	0.26986	0.693767	0.235725	0.194011	0.636952	LDL
363	myo-inositol	Lipid	Inositol Metabolism	0.185658	0.308994	0.728961	0.231143	0.203075	0.636952	LDL
100019884	trans-2-hexenoylglycine	Lipid	Fatty Acid Metabolism (Acyl Glycine)	-0.289141	0.337987	0.753602	-0.384615	0.194413	0.636952	LDL
100001446	5-methyluridine (ribothymidine)	Nucleotide	Pyrimidine Metabolism, Uracil containing	0.165788	0.3645	0.77735	0.231693	0.201972	0.636952	LDL
100001756	4-ethylphenylsulfate	Xenobiotics	Benzoate Metabolism	0.166058	0.363707	0.77735	0.23041	0.204552	0.636952	LDL
100006293	sphingomyelin (d18:1/20:2, d18:2/20:1, d16:1/22:2)*	Lipid	Sphingomyelins	0.158089	0.387501	0.796047	0.232059	0.201239	0.636952	LDL
533	urea	Amino Acid	Urea cycle; Arginine and Proline Metabolism	0.150405	0.41127	0.801188	0.235725	0.194011	0.636952	LDL
100000861	2,3-dihydroxypyridine	Xenobiotics	Food Component/Plant	0.200101	0.492781	0.837212	0.367033	0.196739	0.636952	LDL
100002060	1-docosahexaenoyl-GPE (22:6)*	Lipid	Lysophospholipid	-0.131303	0.473793	0.837212	-0.232793	0.199779	0.636952	LDL
100001467	N2-methylguanosine	Nucleotide	Purine Metabolism, Guanine containing	-0.165269	0.49894	0.840764	-0.305397	0.203564	0.636952	LDL
100020545	N2-acetyl,N6,N6-dimethyllysine	Amino Acid	Lysine Metabolism	0.109377	0.551238	0.854715	0.230226	0.204922	0.636952	LDL
100020241	gamma-glutamylcitrulline*	Peptide	Gamma-glutamyl Amino Acid	0.229174	0.207058	0.643223	0.226927	0.211668	0.643214	LDL
566	valine	Amino Acid	Leucine, Isoleucine and Valine Metabolism	0.245131	0.1763	0.613687	0.226194	0.213188	0.644262	LDL
100009345	1-palmitoleoyl-2-linolenoyl-GPC (16:1/18:3)*	Lipid	Phosphatidylcholine (PC)	-0.133174	0.535019	0.854715	-0.26397	0.212617	0.644262	LDL
100020842	N,N-dimethyl-5-aminovalerate	Amino Acid	Lysine Metabolism	-0.371082	0.129499	0.544266	-0.307692	0.214193	0.645523	LDL
100003119	N-oleoyltaurine	Lipid	Endocannabinoid	0.423384	0.0157556	0.463016	0.267962	0.138132	0.646779	TC
100021918	2,4-di-tert-butylphenol	Xenobiotics	Chemical	0.318299	0.0758261	0.562035	0.266862	0.139819	0.646779	TC
100009271	(S)-3-hydroxybutyrylcarnitine	Lipid	Fatty Acid Metabolism (Acyl Carnitine, Hydroxy)	0.316864	0.0772295	0.563902	0.268328	0.137573	0.646779	TC
100008952	1-palmitoleoylglycerol (16:1)*	Lipid	Monoacylglycerol	0.399184	0.223902	0.739108	0.472727	0.141999	0.646779	TC
100019892	2-hydroxyarachidate*	Lipid	Fatty Acid, Monohydroxy	0.397381	0.226195	0.739108	0.472727	0.141999	0.646779	TC
100001657	glycolithocholate sulfate*	Lipid	Secondary Bile Acid Metabolism	-0.223613	0.293548	0.793159	-0.310435	0.13984	0.646779	TC
100020219	3-formylindole	Xenobiotics	Food Component/Plant	0.153906	0.400342	0.892748	0.265396	0.142091	0.646779	TC
100000285	N-alpha-acetylornithine	Amino Acid	Urea cycle; Arginine and Proline Metabolism	0.24242	0.472623	0.911227	0.472727	0.141999	0.646779	TC
100009005	1-(1-enyl-palmitoyl)-2-oleoyl-GPE (P-16:0/18:1)*	Lipid	Plasmalogen	0.077693	0.672549	0.955585	0.266129	0.140951	0.646779	TC
1021	5-oxoproline	Amino Acid	Glutathione Metabolism	0.269479	0.135829	0.560168	0.224727	0.216249	0.648157	LDL
100021918	2,4-di-tert-butylphenol	Xenobiotics	Chemical	0.255238	0.158576	0.590481	0.224911	0.215865	0.648157	LDL
1052	glycerate	Carbohydrate	Glycolysis, Gluconeogenesis, and Pyruvate Metabolism	0.272893	0.130751	0.634587	0.264663	0.143237	0.649302	TC
100004182	3beta-hydroxy-5-cholenoate	Lipid	Secondary Bile Acid Metabolism	-0.451845	0.0521213	0.518989	-0.347368	0.145066	0.651747	TC
100022482	N-lactoyl phenylalanine	Amino Acid	Lactoyl Amino Acid	-0.210474	0.247574	0.746756	-0.263563	0.144969	0.651747	TC
100003915	palmitamide (16:0)	Lipid	Fatty Acid, Amide	0.245507	0.258839	0.750615	0.313241	0.145559	0.651747	TC
100010936	oleoyl-arachidonoyl-glycerol (18:1/20:4) [1]*	Lipid	Diacylglycerol	-0.189893	0.297891	0.721383	-0.223444	0.218953	0.652693	LDL
100009135	1-(1-enyl-stearoyl)-2-linoleoyl-GPC (P-18:0/18:2)*	Lipid	Plasmalogen	0.0381568	0.835748	0.943972	0.223444	0.218953	0.652693	LDL
100001989	glycocholenate sulfate*	Lipid	Secondary Bile Acid Metabolism	-0.418654	0.0744282	0.561781	-0.345614	0.147245	0.653051	TC
100000765	levulinate (4-oxovalerate)	Xenobiotics	Food Component/Plant	0.60268	0.152057	0.67671	0.607143	0.148231	0.653051	TC
533	urea	Amino Acid	Urea cycle; Arginine and Proline Metabolism	0.241404	0.183175	0.723217	0.26173	0.147889	0.653051	TC
100020824	lithocholic acid sulfate (2)	Lipid	Secondary Bile Acid Metabolism	-0.55429	0.196632	0.730395	-0.607143	0.148231	0.653051	TC
100008985	1-palmitoyl-2-dihomo-linolenoyl-GPC (16:0/20:3n3 or 6)*	Lipid	Phosphatidylcholine (PC)	0.350094	0.0494947	0.518989	0.260997	0.149069	0.654115	TC
100006005	5alpha-androstan-3alpha,17beta-diol monosulfate (2)	Lipid	Androgenic Steroids	0.380922	0.0499615	0.518989	0.28083	0.15592	0.65502	TC
100000987	2-linoleoylglycerol (18:2)	Lipid	Monoacylglycerol	-0.784404	0.0647119	0.546069	-0.657143	0.156175	0.65502	TC
100001556	2-oleoyl-GPC (18:1)*	Lipid	Lysophospholipid	0.297763	0.0978891	0.596523	0.257698	0.154463	0.65502	TC
100009053	palmitoleoyl-oleoyl-glycerol (16:1/18:1) [1]*	Lipid	Diacylglycerol	-0.341521	0.1024	0.600593	-0.297391	0.158154	0.65502	TC
100009232	thioproline	Xenobiotics	Chemical	-0.282007	0.117881	0.61563	-0.254032	0.16062	0.65502	TC
100021712	deoxycholic acid 12-sulfate*	Lipid	Secondary Bile Acid Metabolism	-0.562245	0.146892	0.669251	-0.547619	0.160026	0.65502	TC
100020514	N-acetyltheanine	Xenobiotics	Food Component/Plant	-0.391574	0.148912	0.672248	-0.382143	0.159824	0.65502	TC
100009078	1-oleoyl-2-linoleoyl-GPE (18:1/18:2)*	Lipid	Phosphatidylethanolamine (PE)	-0.263717	0.151716	0.67671	-0.264113	0.15108	0.65502	TC
100004509	S-allylcysteine	Xenobiotics	Food Component/Plant	0.307383	0.164056	0.691773	0.311124	0.158722	0.65502	TC
100015882	glycosyl ceramide (d18:1/20:0, d16:1/22:0)*	Lipid	Hexosylceramides (HCER)	0.245401	0.175809	0.719363	0.259164	0.152049	0.65502	TC
100001580	docosapentaenoate (n6 DPA; 22:5n6)	Lipid	Long Chain Polyunsaturated Fatty Acid (n3 and n6)	0.255183	0.18155	0.721863	0.268966	0.158284	0.65502	TC
100020410	3-hydroxyhippurate sulfate	Xenobiotics	Benzoate Metabolism	-0.415481	0.179207	0.721863	-0.433566	0.159106	0.65502	TC
100009264	glycochenodeoxycholate glucuronide (1)	Lipid	Primary Bile Acid Metabolism	-0.305453	0.203477	0.730395	-0.336842	0.158483	0.65502	TC
100008999	1-(1-enyl-stearoyl)-2-arachidonoyl-GPE (P-18:0/20:4)*	Lipid	Plasmalogen	0.22397	0.217842	0.739108	0.255499	0.158137	0.65502	TC
100005834	9-hydroxystearate	Lipid	Fatty Acid, Monohydroxy	0.342178	0.231104	0.741165	0.402198	0.153974	0.65502	TC
537	trans-urocanate	Amino Acid	Histidine Metabolism	-0.209062	0.250834	0.746756	-0.256232	0.156905	0.65502	TC
100002927	S-methylcysteine sulfoxide	Amino Acid	Methionine, Cysteine, SAM and Taurine Metabolism	0.199879	0.272722	0.763564	0.254765	0.159375	0.65502	TC
100009082	1-linoleoyl-GPA (18:2)*	Lipid	Lysophospholipid	-0.346807	0.500645	0.912991	-0.657143	0.156175	0.65502	TC
418	methylmalonate (MMA)	Lipid	Fatty Acid Metabolism (also BCAA Metabolism)	0.0498232	0.786547	0.979949	0.257698	0.154463	0.65502	TC
100004056	N-methyltaurine	Amino Acid	Methionine, Cysteine, SAM and Taurine Metabolism	0.249391	0.229276	0.663632	0.252308	0.223696	0.656358	LDL
241	phenylpyruvate	Amino Acid	Phenylalanine Metabolism	-0.321371	0.242808	0.67597	-0.335714	0.221212	0.656358	LDL
100001315	p-cresol sulfate	Xenobiotics	Benzoate Metabolism	-0.211832	0.244467	0.67597	-0.221978	0.22207	0.656358	LDL
100000285	N-alpha-acetylornithine	Amino Acid	Urea cycle; Arginine and Proline Metabolism	0.284195	0.397012	0.797214	0.4	0.222868	0.656358	LDL
100003470	pregnanediol-3-glucuronide	Lipid	Progestin Steroids	0.117204	0.544853	0.854715	0.233034	0.223772	0.656358	LDL
213	N6-methyladenosine	Nucleotide	Purine Metabolism, Adenine containing	-0.0750877	0.753047	0.930052	-0.285714	0.222035	0.656358	LDL
1134	urate	Nucleotide	Purine Metabolism, (Hypo)Xanthine/Inosine containing	0.256905	0.15578	0.590481	0.220878	0.224428	0.656528	LDL
100010952	1-stearoyl-2-docosapentaenoyl-GPI (18:0/22:5n3)*	Lipid	Phosphatidylinositol (PI)	0.319912	0.074272	0.561781	0.25	0.167594	0.656789	TC
100001267	piperine	Xenobiotics	Food Component/Plant	0.317373	0.0767297	0.563902	0.252566	0.163132	0.656789	TC
913	maltose	Carbohydrate	Glycogen Metabolism	-0.316051	0.0888586	0.590312	-0.258287	0.168173	0.656789	TC
100001733	hexanoylglutamine	Lipid	Fatty Acid Metabolism (Acyl Glutamine)	0.267234	0.139247	0.655598	0.25	0.167594	0.656789	TC
100000924	1-oleoylglycerol (18:1)	Lipid	Monoacylglycerol	0.338152	0.156768	0.679742	0.329825	0.167887	0.656789	TC
100009272	glycosyl-N-palmitoyl-sphingosine (d18:1/16:0)	Lipid	Hexosylceramides (HCER)	0.23712	0.19131	0.730395	0.252933	0.162501	0.656789	TC
100001987	5alpha-androstan-3beta,17beta-diol disulfate	Lipid	Androgenic Steroids	0.208802	0.268155	0.76209	0.259177	0.16666	0.656789	TC
100001022	threonate	Cofactors and Vitamins	Ascorbate and Aldarate Metabolism	0.188222	0.30224	0.796477	0.249633	0.168239	0.656789	TC
100004328	sphingomyelin (d18:1/14:0, d16:1/16:0)*	Lipid	Sphingomyelins	0.184187	0.31291	0.802044	0.25	0.167594	0.656789	TC
100006370	3beta-hydroxy-5-cholestenoate	Lipid	Sterol	0.184329	0.312531	0.802044	0.2511	0.165671	0.656789	TC
100015835	cerotoylcarnitine (C26)*	Lipid	Fatty Acid Metabolism (Acyl Carnitine, Long Chain Saturated)	0.149573	0.413893	0.892748	0.250367	0.166951	0.656789	TC
330	fumarate	Energy	TCA Cycle	-0.12419	0.498279	0.912991	-0.253299	0.161873	0.656789	TC
100020519	(2,4 or 2,5)-dimethylphenol sulfate	Xenobiotics	Food Component/Plant	0.472703	0.167687	0.593935	0.418182	0.229113	0.65893	LDL
100001320	erythronate*	Carbohydrate	Aminosugar Metabolism	0.203083	0.264948	0.693767	0.219045	0.228396	0.65893	LDL
100010895	2'-O-methylcytidine	Nucleotide	Pyrimidine Metabolism, Cytidine containing	0.213457	0.316584	0.738375	0.254838	0.229454	0.65893	LDL
100005391	3-(3-hydroxyphenyl)propionate sulfate	Xenobiotics	Benzoate Metabolism	-0.217138	0.386766	0.796047	-0.298246	0.229322	0.65893	LDL
100001254	N-acetyltryptophan	Amino Acid	Tryptophan Metabolism	0.132347	0.470254	0.837212	0.218862	0.228795	0.65893	LDL
100020753	palmitoleamide (16:1)*	Lipid	Fatty Acid, Amide	0.104053	0.628485	0.89076	0.255708	0.227814	0.65893	LDL
100000463	indolelactate	Amino Acid	Tryptophan Metabolism	0.0752936	0.682128	0.913668	0.219228	0.227997	0.65893	LDL
100000014	hippurate	Xenobiotics	Benzoate Metabolism	0.0479872	0.794242	0.979949	0.2489	0.169533	0.659495	TC
1254	glycerol	Lipid	Glycerolipid Metabolism	0.219543	0.227313	0.739108	0.248534	0.170183	0.659684	TC
100010850	4-hydroxyphenylacetylglutamine	Peptide	Acetylated Peptides	-0.368597	0.0450374	0.518989	-0.255617	0.17277	0.660492	TC
100020259	glutamine conjugate of C7H12O2*	Partially Characterized Molecules	Partially Characterized Molecules	0.252395	0.163426	0.691773	0.247067	0.1728	0.660492	TC
344	guanidinoacetate	Amino Acid	Creatine Metabolism	-0.242503	0.181129	0.721863	-0.247434	0.172143	0.660492	TC
100001756	4-ethylphenylsulfate	Xenobiotics	Benzoate Metabolism	0.187193	0.304941	0.796477	0.247067	0.1728	0.660492	TC
100010901	gamma-glutamyl-alpha-lysine	Peptide	Gamma-glutamyl Amino Acid	0.182156	0.318369	0.738375	0.217945	0.230799	0.661061	LDL
100002183	S-methylmethionine	Amino Acid	Methionine, Cysteine, SAM and Taurine Metabolism	0.348828	0.169979	0.599572	0.306373	0.23169	0.661069	LDL
537	trans-urocanate	Amino Acid	Histidine Metabolism	-0.228064	0.209326	0.643223	-0.217395	0.232007	0.661069	LDL
100001323	fibrinopeptide A, des-ala(1)*	Peptide	Fibrinogen Cleavage Peptide	0.451441	0.190315	0.730395	0.466667	0.173939	0.661154	TC
100006295	sphingomyelin (d18:1/22:1, d18:2/22:0, d16:1/24:1)*	Lipid	Sphingomyelins	0.229215	0.21484	0.739108	0.250403	0.174256	0.661154	TC
100010922	linoleoyl-arachidonoyl-glycerol (18:2/20:4) [1]*	Lipid	Diacylglycerol	-0.219042	0.228402	0.739108	-0.245968	0.174781	0.661154	TC
100003151	linoleoylcarnitine (C18:2)*	Lipid	Fatty Acid Metabolism (Acyl Carnitine, Polyunsaturated)	-0.231239	0.202882	0.730395	-0.245235	0.176111	0.661622	TC
100002060	1-docosahexaenoyl-GPE (22:6)*	Lipid	Lysophospholipid	-0.171131	0.349027	0.854211	-0.245235	0.176111	0.661622	TC
1082	N-acetylleucine	Amino Acid	Leucine, Isoleucine and Valine Metabolism	0.304446	0.157821	0.590481	0.258957	0.232813	0.661647	LDL
100002107	palmitoyl sphingomyelin (d18:1/16:0)	Lipid	Sphingomyelins	0.292585	0.104153	0.600593	0.244868	0.176778	0.661863	TC
100001313	gamma-glutamylmethionine	Peptide	Gamma-glutamyl Amino Acid	0.130875	0.475247	0.837212	0.216112	0.234842	0.665689	LDL
100001609	7alpha-hydroxy-3-oxo-4-cholestenoate (7-Hoca)	Lipid	Sterol	-0.270516	0.134271	0.646033	-0.243402	0.179467	0.665853	TC
519	myristate (14:0)	Lipid	Long Chain Saturated Fatty Acid	0.209598	0.249592	0.746756	0.243768	0.178792	0.665853	TC
100009375	1-linoleoyl-2-docosapentaenyol-GPC (18:2/22:5n3)*	Lipid	Phosphatidylcholine (PC)	-0.274354	0.414257	0.892748	-0.436364	0.179665	0.665853	TC
100002029	androstenediol (3beta,17beta) monosulfate (2)	Lipid	Androgenic Steroids	0.424621	0.0550303	0.518989	0.302597	0.182441	0.666463	TC
878	fructose	Carbohydrate	Fructose, Mannose and Galactose Metabolism	0.313796	0.0802982	0.57309	0.241569	0.182867	0.666463	TC
100008904	1-stearoyl-2-oleoyl-GPC (18:0/18:1)	Lipid	Phosphatidylcholine (PC)	0.284626	0.114363	0.610589	0.241569	0.182867	0.666463	TC
100002259	cis-4-decenoylcarnitine (C10:1)	Lipid	Fatty Acid Metabolism (Acyl Carnitine, Monounsaturated)	0.258594	0.152985	0.67671	0.242302	0.181502	0.666463	TC
181	laurate (12:0)	Lipid	Medium Chain Fatty Acid	0.205438	0.259328	0.750615	0.241935	0.182184	0.666463	TC
355	histidine	Amino Acid	Histidine Metabolism	0.265071	0.142599	0.567711	0.214462	0.238521	0.669797	LDL
100001657	glycolithocholate sulfate*	Lipid	Secondary Bile Acid Metabolism	-0.163128	0.446285	0.829787	-0.250054	0.238616	0.669797	LDL
100000442	quinate	Xenobiotics	Food Component/Plant	0.120227	0.51219	0.851672	0.214829	0.2377	0.669797	LDL
100020219	3-formylindole	Xenobiotics	Food Component/Plant	0.119629	0.514307	0.851672	0.214279	0.238932	0.669797	LDL
100015967	carotene diol (2)	Cofactors and Vitamins	Vitamin A Metabolism	0.0378253	0.837156	0.943972	0.214096	0.239344	0.669797	LDL
100020377	ethyl beta-glucopyranoside	Xenobiotics	Food Component/Plant	0.402665	0.0414025	0.518989	0.267009	0.187298	0.671187	TC
100002018	5alpha-androstan-3alpha,17beta-diol monosulfate (1)	Lipid	Androgenic Steroids	0.259151	0.17462	0.719214	0.252217	0.186854	0.671187	TC
100015788	sphingomyelin (d18:2/18:1)*	Lipid	Sphingomyelins	0.188542	0.301405	0.796477	0.23937	0.187008	0.671187	TC
100006184	2-methoxyresorcinol sulfate	Xenobiotics	Chemical	-0.358196	0.309476	0.800696	-0.454545	0.186905	0.671187	TC
100000036	3-methyl-2-oxovalerate	Amino Acid	Leucine, Isoleucine and Valine Metabolism	-0.170921	0.349627	0.854211	-0.239003	0.187704	0.671187	TC
100006126	4-vinylguaiacol sulfate	Xenobiotics	Food Component/Plant	0.0878094	0.746414	0.974703	0.347059	0.187834	0.671187	TC
100001553	1-dihomo-linoleoyl-GPC (20:2)*	Lipid	Lysophospholipid	0.228778	0.207864	0.733206	0.23827	0.189102	0.671343	TC
100001446	5-methyluridine (ribothymidine)	Nucleotide	Pyrimidine Metabolism, Uracil containing	0.155572	0.395199	0.892044	0.23827	0.189102	0.671343	TC
811	alanine	Amino Acid	Alanine and Aspartate Metabolism	-0.156014	0.393841	0.797128	-0.213179	0.241409	0.673857	LDL
100015971	cortolone glucuronide (1)	Lipid	Corticosteroids	0.211869	0.244384	0.745524	0.237537	0.190508	0.674151	TC
100020378	2-hydroxysebacate	Lipid	Fatty Acid, Dicarboxylate	-0.523435	0.0663951	0.547872	-0.384615	0.194413	0.67614	TC
100001181	docosapentaenoate (n3 DPA; 22:5n3)	Lipid	Long Chain Polyunsaturated Fatty Acid (n3 and n6)	0.283704	0.115591	0.611646	0.235337	0.194768	0.67614	TC
100002024	5alpha-androstan-3beta,17beta-diol monosulfate (2)	Lipid	Androgenic Steroids	0.221617	0.239207	0.742815	0.244494	0.192878	0.67614	TC
100021065	lactobacillic acid	Xenobiotics	Bacterial/Fungal	-0.22143	0.393042	0.889313	-0.330882	0.194543	0.67614	TC
100002749	S-methylcysteine	Amino Acid	Methionine, Cysteine, SAM and Taurine Metabolism	0.153541	0.401474	0.892748	0.235704	0.194053	0.67614	TC
100000463	indolelactate	Amino Acid	Tryptophan Metabolism	0.0355795	0.846707	0.987672	0.236437	0.192629	0.67614	TC
100020261	glutamine conjugate of C6H10O2 (1)*	Partially Characterized Molecules	Partially Characterized Molecules	0.23237	0.200619	0.730395	0.234971	0.195484	0.676486	TC
100020759	heptadecenamide (17:1)*	Lipid	Fatty Acid, Amide	0.180357	0.323255	0.741864	0.212263	0.243486	0.67793	LDL
100003926	(R)-3-hydroxybutyrylcarnitine	Lipid	Fatty Acid Metabolism (Acyl Carnitine, Hydroxy)	0.199728	0.273092	0.696702	0.211346	0.245575	0.682016	LDL
100019892	2-hydroxyarachidate*	Lipid	Fatty Acid, Monohydroxy	0.35811	0.279533	0.70011	0.381818	0.24656	0.68302	LDL
100020825	3-hydroxyhexanoylcarnitine (1)	Lipid	Fatty Acid Metabolism (Acyl Carnitine, Hydroxy)	0.331243	0.0640377	0.545873	0.233504	0.198368	0.684308	TC
100009069	1-(1-enyl-palmitoyl)-2-linoleoyl-GPE (P-16:0/18:2)*	Lipid	Plasmalogen	0.155498	0.395426	0.797214	0.210247	0.248098	0.68555	LDL
100020491	glucuronide of piperine metabolite C17H21NO3 (3)*	Xenobiotics	Food Component/Plant	0.25926	0.29886	0.79575	0.316821	0.200205	0.687512	TC
1268	gamma-glutamylleucine	Peptide	Gamma-glutamyl Amino Acid	0.178781	0.32757	0.826078	0.232405	0.200551	0.687512	TC
100019978	octadecenedioate (C18:1-DC)	Lipid	Fatty Acid, Dicarboxylate	-0.363088	0.152013	0.67671	-0.32598	0.201637	0.689083	TC
100009019	1-stearyl-2-arachidonoyl-GPC (O-18:0/20:4)*	Lipid	Plasmalogen	0.23747	0.190637	0.628013	0.209147	0.250638	0.689097	LDL
100001403	5-acetylamino-6-amino-3-methyluracil	Xenobiotics	Xanthine Metabolism	0.150153	0.420101	0.807095	0.212925	0.250126	0.689097	LDL
100001393	isovalerylcarnitine (C5)	Amino Acid	Leucine, Isoleucine and Valine Metabolism	-0.14214	0.437734	0.894537	-0.230938	0.203486	0.693243	TC
100020262	glutamine conjugate of C6H10O2 (2)*	Partially Characterized Molecules	Partially Characterized Molecules	0.288137	0.10977	0.605725	0.230572	0.204225	0.693605	TC
100021238	phenylalanylhydroxyproline*	Peptide	Dipeptide	0.316512	0.270237	0.693767	0.327473	0.253071	0.694047	LDL
100006726	linoleoyl ethanolamide	Lipid	Endocannabinoid	0.397794	0.178267	0.613687	0.340659	0.254706	0.695053	LDL
100002367	2R,3R-dihydroxybutyrate	Lipid	Fatty Acid, Dihydroxy	0.19059	0.296087	0.720195	0.20713	0.255338	0.695053	LDL
100001416	orotidine	Nucleotide	Pyrimidine Metabolism, Orotate containing	0.175541	0.336558	0.753477	0.207314	0.254909	0.695053	LDL
100004295	2-piperidinone	Xenobiotics	Food Component/Plant	-0.153561	0.401409	0.892748	-0.229839	0.205707	0.696483	TC
100006005	5alpha-androstan-3alpha,17beta-diol monosulfate (2)	Lipid	Androgenic Steroids	0.290849	0.14107	0.566862	0.226225	0.256516	0.696531	LDL
100015965	ethyl alpha-glucopyranoside	Xenobiotics	Food Component/Plant	0.426366	0.0995911	0.599393	0.332353	0.2085	0.699463	TC
100005376	1-eicosenoyl-GPE (20:1)*	Lipid	Lysophospholipid	0.534451	0.274653	0.763564	0.6	0.208	0.699463	TC
100009225	1-(1-enyl-stearoyl)-2-linoleoyl-GPE (P-18:0/18:2)*	Lipid	Plasmalogen	0.0953195	0.603803	0.931179	0.228739	0.207945	0.699463	TC
100001207	4-imidazoleacetate	Amino Acid	Histidine Metabolism	-0.40073	0.124	0.61563	-0.329412	0.212801	0.701159	TC
100020343	tetradecadienoate (14:2)*	Lipid	Long Chain Polyunsaturated Fatty Acid (n3 and n6)	0.277796	0.123705	0.61563	0.22544	0.214758	0.701159	TC
100001083	indolepropionate	Amino Acid	Tryptophan Metabolism	0.233364	0.198646	0.730395	0.225806	0.213994	0.701159	TC
100008914	1-palmitoyl-2-arachidonoyl-GPC (16:0/20:4n6)	Lipid	Phosphatidylcholine (PC)	0.222905	0.220095	0.739108	0.226173	0.213231	0.701159	TC
100009066	1-palmitoyl-2-oleoyl-GPI (16:0/18:1)*	Lipid	Phosphatidylinositol (PI)	0.216105	0.234857	0.742815	0.225806	0.213994	0.701159	TC
100008919	1-(1-enyl-stearoyl)-2-oleoyl-GPE (P-18:0/18:1)	Lipid	Plasmalogen	0.157947	0.387932	0.887307	0.226906	0.211711	0.701159	TC
100020519	(2,4 or 2,5)-dimethylphenol sulfate	Xenobiotics	Food Component/Plant	0.297618	0.403628	0.892748	0.430303	0.214492	0.701159	TC
100001257	N-acetylasparagine	Amino Acid	Alanine and Aspartate Metabolism	0.128761	0.530736	0.912991	0.25265	0.213048	0.701159	TC
892	nonadecanoate (19:0)	Lipid	Long Chain Saturated Fatty Acid	0.120832	0.556543	0.913946	0.254017	0.210497	0.701159	TC
100008904	1-stearoyl-2-oleoyl-GPC (18:0/18:1)	Lipid	Phosphatidylcholine (PC)	0.257808	0.154281	0.590481	0.203464	0.264033	0.701318	LDL
100020549	cholic acid glucuronide	Lipid	Primary Bile Acid Metabolism	-0.414193	0.159405	0.590481	-0.335165	0.262943	0.701318	LDL
100020204	N-acetyl-2-aminooctanoate*	Lipid	Fatty Acid, Amino	-0.236471	0.192563	0.632459	-0.203648	0.263594	0.701318	LDL
100001946	cyclo(gly-pro)	Peptide	Dipeptide	0.303808	0.206045	0.643223	0.27193	0.260067	0.701318	LDL
100022484	N-lactoyl tyrosine	Amino Acid	Lactoyl Amino Acid	-0.216078	0.37428	0.786562	-0.270175	0.263276	0.701318	LDL
100000010	3-phenylpropionate (hydrocinnamate)	Xenobiotics	Benzoate Metabolism	0.164644	0.393394	0.797128	0.214558	0.263701	0.701318	LDL
100006374	1,2,3-benzenetriol sulfate (2)	Xenobiotics	Chemical	-0.156889	0.4077	0.801188	-0.211814	0.261154	0.701318	LDL
100021261	leucylhydroxyproline*	Peptide	Dipeptide Derivative	-0.0904077	0.622659	0.888916	-0.203831	0.263155	0.701318	LDL
100001399	1,7-dimethylurate	Xenobiotics	Xanthine Metabolism	0.0791886	0.671966	0.904475	0.208489	0.260362	0.701318	LDL
913	maltose	Carbohydrate	Glycogen Metabolism	-0.20997	0.265427	0.693767	-0.210257	0.264759	0.701547	LDL
100001425	5,6-dihydrouridine	Nucleotide	Pyrimidine Metabolism, Uracil containing	-0.0745599	0.685067	0.957789	-0.225073	0.215524	0.701574	TC
100000841	oxalate (ethanedioate)	Cofactors and Vitamins	Ascorbate and Aldarate Metabolism	0.200701	0.270715	0.763511	0.223974	0.217835	0.704138	TC
100006614	adipoylcarnitine (C6-DC)	Lipid	Fatty Acid Metabolism (Acyl Carnitine, Dicarboxylate)	0.19942	0.273848	0.763564	0.22434	0.217063	0.704138	TC
100020753	palmitoleamide (16:1)*	Lipid	Fatty Acid, Amide	0.132478	0.537175	0.912991	0.26087	0.218238	0.704138	TC
100001054	butyrylcarnitine (C4)	Lipid	Fatty Acid Metabolism (also BCAA Metabolism)	0.212039	0.243996	0.67597	0.202181	0.267122	0.704527	LDL
100000672	1-myristoyl-2-palmitoyl-GPC (14:0/16:0)	Lipid	Phosphatidylcholine (PC)	0.176448	0.334027	0.75064	0.201631	0.268452	0.704527	LDL
100001776	2-linoleoyl-GPE (18:2)*	Lipid	Lysophospholipid	-0.222535	0.390624	0.797128	-0.284488	0.268426	0.704527	LDL
100003260	carboxyethyl-GABA	Amino Acid	Glutamate Metabolism	-0.156233	0.393168	0.797128	-0.201631	0.268452	0.704527	LDL
100001007	ribonate	Carbohydrate	Pentose Metabolism	0.24224	0.181617	0.721863	0.22324	0.219384	0.705761	TC
100020493	glucuronide of piperine metabolite C17H21NO3 (5)*	Xenobiotics	Food Component/Plant	0.342778	0.230233	0.740662	0.349451	0.22069	0.707886	TC
100006082	4-hydroxychlorothalonil	Xenobiotics	Chemical	0.400963	0.0229466	0.518989	0.219208	0.228041	0.710684	TC
100008989	1-palmitoyl-2-eicosapentaenoyl-GPC (16:0/20:5)*	Lipid	Phosphatidylcholine (PC)	0.322341	0.0719777	0.561781	0.220308	0.225657	0.710684	TC
100002103	5-methylthioribose**	Amino Acid	Methionine, Cysteine, SAM and Taurine Metabolism	-0.321203	0.15568	0.679001	-0.275325	0.227064	0.710684	TC
100006292	sphingomyelin (d18:1/20:1, d18:2/20:0)*	Lipid	Sphingomyelins	0.212736	0.242414	0.742815	0.219941	0.22645	0.710684	TC
100001278	10-heptadecenoate (17:1n7)	Lipid	Long Chain Monounsaturated Fatty Acid	0.201993	0.267577	0.76209	0.221041	0.224078	0.710684	TC
100001851	N-acetylserine	Amino Acid	Glycine, Serine and Threonine Metabolism	0.200689	0.270744	0.763511	0.219208	0.228041	0.710684	TC
100001990	taurocholenate sulfate*	Lipid	Secondary Bile Acid Metabolism	-0.309378	0.303667	0.796477	-0.362637	0.223316	0.710684	TC
100020217	N,N,N-trimethyl-alanylproline betaine (TMAP)	Amino Acid	Urea cycle; Arginine and Proline Metabolism	0.174179	0.340378	0.842877	0.220308	0.225657	0.710684	TC
100003260	carboxyethyl-GABA	Amino Acid	Glutamate Metabolism	-0.170946	0.349554	0.854211	-0.221774	0.222506	0.710684	TC
100020361	3-amino-2-piperidone	Amino Acid	Urea cycle; Arginine and Proline Metabolism	-0.016001	0.930735	0.991287	0.220674	0.224867	0.710684	TC
100009021	1-palmityl-2-arachidonoyl-GPC (O-16:0/20:4)*	Lipid	Plasmalogen	0.316323	0.0777642	0.563902	0.217742	0.231245	0.711064	TC
100009075	1-palmitoleoyl-2-linoleoyl-GPC (16:1/18:2)*	Lipid	Phosphatidylcholine (PC)	0.358852	0.0781341	0.563902	0.246923	0.234069	0.711064	TC
100001178	3-carboxy-4-methyl-5-propyl-2-furanpropanoate (CMPF)	Lipid	Fatty Acid, Dicarboxylate	0.232014	0.201329	0.730395	0.215909	0.235293	0.711064	TC
100002094	gamma-CEHC	Cofactors and Vitamins	Tocopherol Metabolism	-0.26114	0.207355	0.733206	-0.248462	0.231073	0.711064	TC
100006290	sphingomyelin (d18:1/20:0, d16:1/22:0)*	Lipid	Sphingomyelins	0.213886	0.239816	0.742815	0.218109	0.230441	0.711064	TC
100015851	docosapentaenoylcarnitine (C22:5n3)*	Lipid	Fatty Acid Metabolism (Acyl Carnitine, Polyunsaturated)	0.196248	0.307584	0.798719	0.228079	0.234055	0.711064	TC
100001195	docosatrienoate (22:3n3)	Lipid	Long Chain Polyunsaturated Fatty Acid (n3 and n6)	0.228639	0.33225	0.832142	0.279699	0.232348	0.711064	TC
100008980	1-stearoyl-2-linoleoyl-GPC (18:0/18:2)*	Lipid	Phosphatidylcholine (PC)	0.167197	0.360381	0.862691	0.215909	0.235293	0.711064	TC
100006430	arabitol/xylitol	Carbohydrate	Pentose Metabolism	0.108171	0.555664	0.913946	0.217375	0.232051	0.711064	TC
100001843	gamma-glutamylalanine	Peptide	Gamma-glutamyl Amino Acid	0.164528	0.697032	0.964121	0.47619	0.232936	0.711064	TC
100020545	N2-acetyl,N6,N6-dimethyllysine	Amino Acid	Lysine Metabolism	0.0592795	0.747243	0.974703	0.218842	0.228839	0.711064	TC
100020842	N,N-dimethyl-5-aminovalerate	Amino Acid	Lysine Metabolism	-0.3435	0.162829	0.691773	-0.294118	0.236143	0.711674	TC
100001876	sphinganine-1-phosphate	Lipid	Sphingolipid Synthesis	-0.208909	0.251188	0.746756	-0.214443	0.238565	0.715044	TC
100006282	umbelliferone sulfate	Xenobiotics	Food Component/Plant	-0.14155	0.563238	0.913946	-0.284211	0.238296	0.715044	TC
100015965	ethyl alpha-glucopyranoside	Xenobiotics	Food Component/Plant	0.312765	0.238215	0.670938	0.291176	0.273887	0.717074	LDL
100009154	1-palmitoyl-2-gamma-linolenoyl-GPC (16:0/18:3n6)*	Lipid	Phosphatidylcholine (PC)	-0.256528	0.274939	0.763564	-0.275188	0.240283	0.71823	TC
100000936	3-methyl-2-oxobutyrate	Amino Acid	Leucine, Isoleucine and Valine Metabolism	-0.127549	0.486636	0.912991	-0.213343	0.241039	0.718533	TC
100020822	dihydrocaffeate sulfate (2)	Xenobiotics	Food Component/Plant	0.0817095	0.667746	0.902115	0.205807	0.275235	0.718888	LDL
100001253	N-acetylglutamine	Amino Acid	Glutamate Metabolism	0.2461	0.174541	0.719214	0.212977	0.241868	0.719049	TC
100021372	2-hydroxy-4-(methylthio)butanoic acid	Amino Acid	Methionine, Cysteine, SAM and Taurine Metabolism	0.0638818	0.72833	0.970035	0.21261	0.242698	0.719568	TC
891	margarate (17:0)	Lipid	Long Chain Saturated Fatty Acid	0.251324	0.16528	0.692033	0.211877	0.244365	0.720613	TC
100019972	dodecenedioate (C12:1-DC)*	Lipid	Fatty Acid, Dicarboxylate	-0.470669	0.201001	0.730395	-0.433333	0.243952	0.720613	TC
207	adenosine 3',5'-cyclic monophosphate (cAMP)	Nucleotide	Purine Metabolism, Adenine containing	-0.394879	0.203953	0.730395	-0.363636	0.245265	0.721329	TC
100004327	1-stearoyl-GPS (18:0)*	Lipid	Lysophospholipid	0.23586	0.437891	0.894537	0.346154	0.246625	0.72339	TC
100009030	lactosyl-N-palmitoyl-sphingosine (d18:1/16:0)	Lipid	Lactosylceramides (LCER)	0.226209	0.213156	0.647736	0.194849	0.285221	0.725322	LDL
100020514	N-acetyltheanine	Xenobiotics	Food Component/Plant	-0.309586	0.261493	0.693767	-0.296429	0.283355	0.725322	LDL
100015971	cortolone glucuronide (1)	Lipid	Corticosteroids	0.182632	0.317085	0.738375	0.195582	0.283376	0.725322	LDL
100022482	N-lactoyl phenylalanine	Amino Acid	Lactoyl Amino Acid	-0.174146	0.34047	0.756065	-0.196682	0.280624	0.725322	LDL
828	arabinose	Carbohydrate	Pentose Metabolism	-0.218716	0.452515	0.832307	-0.30989	0.280933	0.725322	LDL
100002397	alpha-ketoglutaramate*	Amino Acid	Glutamate Metabolism	0.127535	0.486683	0.837212	0.195033	0.284759	0.725322	LDL
100009154	1-palmitoyl-2-gamma-linolenoyl-GPC (16:0/18:3n6)*	Lipid	Phosphatidylcholine (PC)	-0.171373	0.470033	0.837212	-0.251128	0.285522	0.725322	LDL
100001868	4-allylphenol sulfate	Xenobiotics	Food Component/Plant	-0.115209	0.530076	0.853531	-0.196132	0.281998	0.725322	LDL
849	caffeine	Xenobiotics	Xanthine Metabolism	0.111524	0.550313	0.854715	0.19881	0.283635	0.725322	LDL
100001106	1,3-dimethylurate	Xenobiotics	Xanthine Metabolism	0.107758	0.563941	0.862994	0.198004	0.285633	0.725322	LDL
100001674	2-arachidonoyl-GPE (20:4)*	Lipid	Lysophospholipid	-0.179933	0.596522	0.87573	-0.354545	0.284693	0.725322	LDL
100002129	pregnenolone sulfate	Lipid	Pregnenolone Steroids	-0.0542605	0.768033	0.931348	0.195766	0.282916	0.725322	LDL
100003169	isoleucylglycine	Peptide	Dipeptide	-0.136441	0.524957	0.852005	-0.226571	0.287041	0.727215	LDL
100009160	1-(1-enyl-palmitoyl)-2-palmitoleoyl-GPC (P-16:0/16:1)*	Lipid	Plasmalogen	0.318983	0.0751639	0.561781	0.209677	0.24941	0.727343	TC
100003473	alliin	Xenobiotics	Food Component/Plant	-0.429143	0.110433	0.605725	-0.314286	0.25394	0.727343	TC
100002183	S-methylmethionine	Amino Acid	Methionine, Cysteine, SAM and Taurine Metabolism	0.33839	0.183998	0.723462	0.294118	0.251844	0.727343	TC
100001170	3-hydroxy-2-ethylpropionate	Amino Acid	Leucine, Isoleucine and Valine Metabolism	0.250946	0.23689	0.742815	0.242609	0.253348	0.727343	TC
100003926	(R)-3-hydroxybutyrylcarnitine	Lipid	Fatty Acid Metabolism (Acyl Carnitine, Hydroxy)	0.194732	0.285517	0.779136	0.208578	0.251958	0.727343	TC
980	pentadecanoate (15:0)	Lipid	Long Chain Saturated Fatty Acid	0.187231	0.304841	0.796477	0.208211	0.252812	0.727343	TC
100001073	androsterone sulfate	Lipid	Androgenic Steroids	0.187954	0.302942	0.796477	0.209677	0.24941	0.727343	TC
100020225	1-(1-enyl-oleoyl)-2-docosahexaenoyl-GPC (P-18:1/22:6)*	Lipid	Plasmalogen	0.146364	0.424094	0.892957	0.208578	0.251958	0.727343	TC
1025	pipecolate	Amino Acid	Lysine Metabolism	0.126035	0.491865	0.912991	0.208211	0.252812	0.727343	TC
100001570	1-linoleoyl-GPE (18:2)*	Lipid	Lysophospholipid	-0.22755	0.210383	0.736556	-0.207111	0.255383	0.728237	TC
100001586	gulonate*	Cofactors and Vitamins	Ascorbate and Aldarate Metabolism	0.150392	0.411312	0.892748	0.206745	0.256244	0.728237	TC
100002199	tridecenedioate (C13:1-DC)*	Lipid	Fatty Acid, Dicarboxylate	0.0110334	0.952209	0.991287	0.206745	0.256244	0.728237	TC
100000299	xanthosine	Nucleotide	Purine Metabolism, (Hypo)Xanthine/Inosine containing	0.333034	0.120467	0.516221	0.231225	0.288441	0.729078	LDL
100019978	octadecenedioate (C18:1-DC)	Lipid	Fatty Acid, Dicarboxylate	-0.339552	0.182401	0.623345	-0.272226	0.290488	0.731064	LDL
361	inosine	Nucleotide	Purine Metabolism, (Hypo)Xanthine/Inosine containing	0.238187	0.196933	0.637138	0.195383	0.292188	0.731064	LDL
100001556	2-oleoyl-GPC (18:1)*	Lipid	Lysophospholipid	0.215728	0.235696	0.670938	0.19155	0.293616	0.731064	LDL
100000936	3-methyl-2-oxobutyrate	Amino Acid	Leucine, Isoleucine and Valine Metabolism	-0.17341	0.342546	0.757608	-0.192283	0.291737	0.731064	LDL
100019981	heptenedioate (C7:1-DC)*	Lipid	Fatty Acid, Dicarboxylate	0.173592	0.342034	0.757608	0.191183	0.294558	0.731064	LDL
100015882	glycosyl ceramide (d18:1/20:0, d16:1/22:0)*	Lipid	Hexosylceramides (HCER)	0.150384	0.411338	0.801188	0.19265	0.2908	0.731064	LDL
100022127	tetrahydrocortisone glucuronide (5)	Lipid	Corticosteroids	0.14228	0.437277	0.8228	0.191367	0.294087	0.731064	LDL
100015755	ceramide (d18:1/20:0, d16:1/22:0, d20:1/18:0)*	Lipid	Ceramides	0.101076	0.582019	0.872234	0.191367	0.294087	0.731064	LDL
100005351	1-eicosapentaenoyl-GPC (20:5)*	Lipid	Lysophospholipid	0.246553	0.173724	0.719214	0.205645	0.258838	0.731818	TC
100020241	gamma-glutamylcitrulline*	Peptide	Gamma-glutamyl Amino Acid	0.133826	0.465264	0.911227	0.205645	0.258838	0.731818	TC
100002470	2-arachidonoyl-GPI (20:4)*	Lipid	Lysophospholipid	-0.648705	0.0424466	0.368369	-0.357576	0.310376	0.732547	LDL
100021502	(2 or 3)-decenoate (10:1n7 or n8)	Lipid	Medium Chain Fatty Acid	-0.489033	0.181554	0.622389	-0.383333	0.308495	0.732547	LDL
1087	erucate (22:1n9)	Lipid	Long Chain Monounsaturated Fatty Acid	0.24185	0.197886	0.637138	0.192012	0.309389	0.732547	LDL
100020211	3-hydroxybutyroylglycine**	Lipid	Fatty Acid Metabolism (Acyl Glycine)	-0.225444	0.214749	0.650774	-0.188984	0.300253	0.732547	LDL
100002466	cysteinylglycine disulfide*	Amino Acid	Glutathione Metabolism	0.220843	0.224503	0.663476	0.186417	0.306984	0.732547	LDL
100015590	1-stearyl-2-linoleoyl-GPC (O-18:0/18:2)*	Lipid	Plasmalogen	0.219503	0.2274	0.663632	0.185684	0.308925	0.732547	LDL
100004046	N-acetylcarnosine	Amino Acid	Histidine Metabolism	0.217293	0.232233	0.668659	0.189717	0.298347	0.732547	LDL
100002952	docosadioate (C22-DC)	Lipid	Fatty Acid, Dicarboxylate	-0.406597	0.2436	0.67597	-0.358664	0.308799	0.732547	LDL
100022014	bilirubin degradation product, C16H18N2O5 (3)**	Partially Characterized Molecules	Partially Characterized Molecules	0.206877	0.290848	0.717963	0.201423	0.304035	0.732547	LDL
100020479	indoleacetoylcarnitine*	Amino Acid	Tryptophan Metabolism	-0.189199	0.299693	0.724021	-0.189717	0.298347	0.732547	LDL
100009000	1-(1-enyl-palmitoyl)-2-docosahexaenoyl-GPE (P-16:0/22:6)*	Lipid	Plasmalogen	0.18695	0.30558	0.728567	0.184584	0.31185	0.732547	LDL
100002105	stearamide (18:0)	Lipid	Fatty Acid, Amide	0.166337	0.362891	0.77735	0.186784	0.306017	0.732547	LDL
100000743	2-hydroxyoctanoate	Lipid	Fatty Acid, Monohydroxy	0.287205	0.391811	0.797128	0.336364	0.311824	0.732547	LDL
100001466	3-methylcytidine	Nucleotide	Pyrimidine Metabolism, Cytidine containing	-0.154122	0.399672	0.797214	-0.185684	0.308925	0.732547	LDL
100008994	1-stearoyl-2-linoleoyl-GPI (18:0/18:2)	Lipid	Phosphatidylinositol (PI)	-0.152902	0.403458	0.80035	-0.187334	0.304569	0.732547	LDL
100001948	succinylcarnitine (C4-DC)	Energy	TCA Cycle	-0.143921	0.431954	0.815583	-0.188617	0.301209	0.732547	LDL
100002014	5alpha-pregnan-3beta,20alpha-diol monosulfate (2)	Lipid	Progestin Steroids	0.129605	0.48712	0.837212	0.188325	0.310307	0.732547	LDL
100015591	phosphatidylcholine (16:0/20:4n3; 18:1/18:3n6)*	Lipid	Phosphatidylcholine (PC)	0.220809	0.468486	0.837212	0.307692	0.306447	0.732547	LDL
100001956	N-methylproline	Amino Acid	Urea cycle; Arginine and Proline Metabolism	0.123546	0.500525	0.841114	0.185318	0.309898	0.732547	LDL
564	threonine	Amino Acid	Glycine, Serine and Threonine Metabolism	0.089866	0.624753	0.888916	0.184951	0.310873	0.732547	LDL
100001396	7-methylxanthine	Xenobiotics	Xanthine Metabolism	0.0876274	0.639254	0.89586	0.188729	0.309253	0.732547	LDL
100008919	1-(1-enyl-stearoyl)-2-oleoyl-GPE (P-18:0/18:1)	Lipid	Plasmalogen	0.0711861	0.698638	0.92001	0.187884	0.303126	0.732547	LDL
100015835	cerotoylcarnitine (C26)*	Lipid	Fatty Acid Metabolism (Acyl Carnitine, Long Chain Saturated)	0.0575798	0.754264	0.930052	0.18825	0.302167	0.732547	LDL
356	cortisol	Lipid	Corticosteroids	0.0466278	0.799951	0.942905	0.1877	0.303607	0.732547	LDL
418	methylmalonate (MMA)	Lipid	Fatty Acid Metabolism (also BCAA Metabolism)	0.0415731	0.821268	0.943972	0.185867	0.308439	0.732547	LDL
100000665	docosahexaenoate (DHA; 22:6n3)	Lipid	Long Chain Polyunsaturated Fatty Acid (n3 and n6)	0.311316	0.0828477	0.586348	0.202713	0.26584	0.736426	TC
100022517	1-oleyl-GPC (O-18:1)*	Lipid	Lysoplasmalogen	-0.279746	0.120982	0.61563	-0.204179	0.262324	0.736426	TC
100009122	1-pentadecanoyl-2-arachidonoyl-GPC (15:0/20:4)*	Lipid	Phosphatidylcholine (PC)	0.23622	0.19305	0.730395	0.203079	0.264958	0.736426	TC
100022484	N-lactoyl tyrosine	Amino Acid	Lactoyl Amino Acid	-0.284726	0.237409	0.742815	-0.268421	0.26651	0.736426	TC
100001398	3,7-dimethylurate	Xenobiotics	Xanthine Metabolism	0.286841	0.248478	0.746756	0.277606	0.26471	0.736426	TC
100001618	1-myristoylglycerol (14:0)	Lipid	Monoacylglycerol	-0.489568	0.324318	0.819761	-0.542857	0.265703	0.736426	TC
100002488	isoursodeoxycholate	Lipid	Secondary Bile Acid Metabolism	0.168877	0.372335	0.876506	0.211123	0.262749	0.736426	TC
100001314	gamma-glutamylthreonine	Peptide	Gamma-glutamyl Amino Acid	0.162121	0.375352	0.878559	0.202713	0.26584	0.736426	TC
100009142	1-stearoyl-2-docosapentaenoyl-GPC (18:0/22:5n6)*	Lipid	Phosphatidylcholine (PC)	-0.0993843	0.588385	0.923257	-0.203446	0.264078	0.736426	TC
1231	dihomo-linoleate (20:2n6)	Lipid	Long Chain Polyunsaturated Fatty Acid (n3 and n6)	0.205615	0.258908	0.750615	0.201979	0.26761	0.737607	TC
100001409	N1-methylinosine	Nucleotide	Purine Metabolism, (Hypo)Xanthine/Inosine containing	0.128613	0.482977	0.837212	0.183485	0.314792	0.737879	LDL
100015914	1-lignoceroyl-2-arachidonoyl-GPC (24:0/20:4)*	Lipid	Phosphatidylcholine (PC)	-0.206527	0.332919	0.75064	-0.213913	0.315527	0.738024	LDL
100006126	4-vinylguaiacol sulfate	Xenobiotics	Food Component/Plant	0.090178	0.739792	0.926942	0.267647	0.316254	0.738151	LDL
100002397	alpha-ketoglutaramate*	Amino Acid	Glutamate Metabolism	0.128792	0.482363	0.912991	0.201613	0.268497	0.738199	TC
482	lactate	Carbohydrate	Glycolysis, Gluconeogenesis, and Pyruvate Metabolism	-0.108065	0.556052	0.857932	-0.182568	0.317258	0.73892	LDL
100015840	dihomo-linolenoylcarnitine (C20:3n3 or 6)*	Lipid	Fatty Acid Metabolism (Acyl Carnitine, Polyunsaturated)	-0.112377	0.540304	0.854715	-0.182201	0.318247	0.739655	LDL
100022480	N-lactoyl leucine	Amino Acid	Lactoyl Amino Acid	-0.346004	0.105825	0.600593	-0.240119	0.269769	0.739843	TC
100008984	1-palmitoyl-2-palmitoleoyl-GPC (16:0/16:1)*	Lipid	Phosphatidylcholine (PC)	0.232753	0.199857	0.730395	0.200513	0.271172	0.740491	TC
100003240	N-stearoyltaurine	Lipid	Endocannabinoid	0.113833	0.686256	0.957789	0.303571	0.271356	0.740491	TC
100010928	linoleoyl-docosahexaenoyl-glycerol (18:2/22:6) [1]*	Lipid	Diacylglycerol	0.291468	0.118111	0.516221	0.187987	0.319834	0.741127	LDL
1537	1-palmitoyl-2-linoleoyl-GPC (16:0/18:2)	Lipid	Phosphatidylcholine (PC)	0.218641	0.229277	0.663632	0.181468	0.320232	0.741127	LDL
564	threonine	Amino Acid	Glycine, Serine and Threonine Metabolism	0.0688525	0.708079	0.966771	0.199413	0.273864	0.74463	TC
100002761	androsterone glucuronide	Lipid	Androgenic Steroids	0.0644893	0.734937	0.970035	0.206229	0.27423	0.74463	TC
424	palmitate (16:0)	Lipid	Long Chain Saturated Fatty Acid	0.255341	0.158403	0.590481	0.180368	0.323223	0.746475	LDL
100001651	2-oleoyl-GPE (18:1)*	Lipid	Lysophospholipid	-0.310347	0.210062	0.643681	-0.243676	0.329856	0.750068	LDL
180	linoleate (18:2n6)	Lipid	Long Chain Polyunsaturated Fatty Acid (n3 and n6)	0.22043	0.225394	0.663476	0.177619	0.330776	0.750068	LDL
100019972	dodecenedioate (C12:1-DC)*	Lipid	Fatty Acid, Dicarboxylate	-0.439114	0.237005	0.670938	-0.366667	0.33174	0.750068	LDL
100006369	N-carbamoylalanine	Amino Acid	Alanine and Aspartate Metabolism	0.235147	0.26869	0.693767	0.209176	0.326616	0.750068	LDL
100000706	alpha-hydroxyisocaproate	Amino Acid	Leucine, Isoleucine and Valine Metabolism	0.205762	0.293514	0.717963	0.192118	0.327378	0.750068	LDL
100000036	3-methyl-2-oxovalerate	Amino Acid	Leucine, Isoleucine and Valine Metabolism	-0.168969	0.355238	0.768632	-0.178719	0.327742	0.750068	LDL
100019975	hexadecenedioate (C16:1-DC)*	Lipid	Fatty Acid, Dicarboxylate	0.177959	0.364936	0.77735	0.192145	0.32731	0.750068	LDL
100002024	5alpha-androstan-3beta,17beta-diol monosulfate (2)	Lipid	Androgenic Steroids	0.168826	0.372483	0.784287	0.183558	0.331573	0.750068	LDL
100001876	sphinganine-1-phosphate	Lipid	Sphingolipid Synthesis	-0.135314	0.46027	0.837212	-0.177069	0.3323	0.750068	LDL
100001730	3,4-dihydroxybutyrate	Lipid	Fatty Acid, Dihydroxy	0.0552252	0.764024	0.931348	0.177619	0.330776	0.750068	LDL
1111	vanillylmandelate (VMA)	Amino Acid	Tyrosine Metabolism	0.0450492	0.806594	0.942905	0.177436	0.331284	0.750068	LDL
100001739	dihomo-linolenate (20:3n3 or n6)	Lipid	Long Chain Polyunsaturated Fatty Acid (n3 and n6)	0.25799	0.15398	0.677345	0.197947	0.27748	0.750349	TC
100015590	1-stearyl-2-linoleoyl-GPC (O-18:0/18:2)*	Lipid	Plasmalogen	0.240006	0.185803	0.725007	0.197581	0.278388	0.750349	TC
100009124	1-margaroyl-2-arachidonoyl-GPC (17:0/20:4)*	Lipid	Phosphatidylcholine (PC)	0.207567	0.254316	0.750615	0.197581	0.278388	0.750349	TC
100022005	bilirubin degradation product, C17H18N2O4 (1)**	Partially Characterized Molecules	Partially Characterized Molecules	0.318602	0.105297	0.495755	0.193558	0.333366	0.750929	LDL
100005714	1-linolenoyl-GPE (18:3)*	Lipid	Lysophospholipid	-0.218923	0.293077	0.793159	-0.224615	0.280388	0.753887	TC
100001198	myristoleate (14:1n5)	Lipid	Long Chain Monounsaturated Fatty Acid	0.156957	0.39095	0.797128	0.175786	0.335872	0.755023	LDL
100001999	21-hydroxypregnenolone disulfate	Lipid	Pregnenolone Steroids	-0.343065	0.109022	0.504851	-0.209538	0.337267	0.75661	LDL
100001765	3-methyladipate	Lipid	Fatty Acid, Dicarboxylate	-0.14737	0.472496	0.911227	-0.219145	0.282101	0.756637	TC
100000437	theophylline	Xenobiotics	Xanthine Metabolism	0.183894	0.330672	0.750098	0.179998	0.341198	0.763865	LDL
100015625	glycosyl-N-behenoyl-sphingadienine (d18:2/22:0)*	Lipid	Hexosylceramides (HCER)	0.238246	0.189148	0.628013	0.17212	0.346205	0.765311	LDL
100009007	1-(1-enyl-palmitoyl)-2-oleoyl-GPC (P-16:0/18:1)*	Lipid	Plasmalogen	0.228343	0.208755	0.643223	0.173403	0.342567	0.765311	LDL
100020259	glutamine conjugate of C7H12O2*	Partially Characterized Molecules	Partially Characterized Molecules	0.202842	0.265528	0.693767	0.172486	0.345164	0.765311	LDL
100000054	5-hydroxylysine	Amino Acid	Lysine Metabolism	-0.196236	0.281739	0.70261	-0.171937	0.346727	0.765311	LDL
136	cholate	Lipid	Primary Bile Acid Metabolism	-0.248435	0.320197	0.739628	-0.236326	0.345101	0.765311	LDL
100006379	C-glycosyltryptophan	Amino Acid	Tryptophan Metabolism	0.10714	0.559457	0.860763	0.17212	0.346205	0.765311	LDL
100020225	1-(1-enyl-oleoyl)-2-docosahexaenoyl-GPC (P-18:1/22:6)*	Lipid	Plasmalogen	0.0633354	0.730568	0.926942	0.173036	0.343604	0.765311	LDL
880	adenine	Nucleotide	Purine Metabolism, Adenine containing	-0.212078	0.383402	0.793569	-0.22807	0.347678	0.765869	LDL
566	valine	Amino Acid	Leucine, Isoleucine and Valine Metabolism	0.225283	0.215086	0.739108	0.194282	0.286654	0.766974	TC
100001417	phenylacetylglutamine	Peptide	Acetylated Peptides	-0.134504	0.462983	0.911227	-0.193182	0.289444	0.768813	TC
100015755	ceramide (d18:1/20:0, d16:1/22:0, d20:1/18:0)*	Lipid	Ceramides	0.127334	0.487375	0.912991	0.193182	0.289444	0.768813	TC
100020833	2-ketocaprylate	Amino Acid	Leucine, Isoleucine and Valine Metabolism	0.261821	0.53106	0.912991	0.428571	0.289403	0.768813	TC
100015586	1-palmityl-2-palmitoyl-GPC (O-16:0/16:0)*	Lipid	Plasmalogen	0.223325	0.219205	0.656145	0.170837	0.349867	0.769147	LDL
100020866	dimethylguanidino valeric acid (DMGV)*	Amino Acid	Urea cycle; Arginine and Proline Metabolism	-0.27268	0.231741	0.741165	-0.241558	0.291471	0.770466	TC
100019981	heptenedioate (C7:1-DC)*	Lipid	Fatty Acid, Dicarboxylate	0.210364	0.247828	0.746756	0.192449	0.291313	0.770466	TC
342	glycocholate	Lipid	Primary Bile Acid Metabolism	-0.334667	0.0611742	0.541194	-0.191716	0.29319	0.771295	TC
100001310	nicotinamide riboside	Cofactors and Vitamins	Nicotinate and Nicotinamide Metabolism	-0.288313	0.419178	0.892748	-0.369697	0.29305	0.771295	TC
100003425	cis-urocanate	Amino Acid	Histidine Metabolism	0.548433	0.159279	0.590481	0.380952	0.351813	0.771834	LDL
100001609	7alpha-hydroxy-3-oxo-4-cholestenoate (7-Hoca)	Lipid	Sterol	-0.159476	0.383297	0.793569	-0.16992	0.352497	0.771834	LDL
100005716	1-oleoyl-GPG (18:1)*	Lipid	Lysophospholipid	0.523471	0.0984235	0.596523	0.345455	0.298089	0.772074	TC
229	arachidonate (20:4n6)	Lipid	Long Chain Polyunsaturated Fatty Acid (n3 and n6)	0.257759	0.154363	0.677345	0.190249	0.296968	0.772074	TC
100000997	3-hydroxydecanoate	Lipid	Fatty Acid, Monohydroxy	0.22037	0.225524	0.739108	0.190616	0.29602	0.772074	TC
100020211	3-hydroxybutyroylglycine**	Lipid	Fatty Acid Metabolism (Acyl Glycine)	-0.194902	0.285088	0.779136	-0.189516	0.298868	0.772074	TC
100002945	(14 or 15)-methylpalmitate (a17:0 or i17:0)	Lipid	Fatty Acid, Branched	0.18371	0.314188	0.802044	0.18915	0.299821	0.772074	TC
100002376	dexpanthenol	Xenobiotics	Chemical	0.225014	0.505913	0.912991	0.345455	0.298089	0.772074	TC
100009035	1-pentadecanoyl-2-linoleoyl-GPC (15:0/18:2)*	Lipid	Phosphatidylcholine (PC)	0.104753	0.56829	0.916754	0.190616	0.29602	0.772074	TC
100001472	mead acid (20:3n9)	Lipid	Long Chain Polyunsaturated Fatty Acid (n3 and n6)	-0.121213	0.654747	0.950076	-0.279412	0.294618	0.772074	TC
100015967	carotene diol (2)	Cofactors and Vitamins	Vitamin A Metabolism	-0.020243	0.912436	0.991287	0.18915	0.299821	0.772074	TC
100010901	gamma-glutamyl-alpha-lysine	Peptide	Gamma-glutamyl Amino Acid	0.0791416	0.666791	0.955585	0.18805	0.302691	0.77764	TC
100004329	sphingomyelin (d18:2/16:0, d18:1/16:1)*	Lipid	Sphingomyelins	0.196206	0.281812	0.70261	0.168637	0.356198	0.778385	LDL
100015793	sphingomyelin (d17:2/16:0, d18:2/15:0)*	Lipid	Sphingomyelins	0.252849	0.162644	0.591709	0.167721	0.358856	0.782635	LDL
100000787	N-acetylaspartate (NAA)	Amino Acid	Alanine and Aspartate Metabolism	0.143678	0.43274	0.815663	0.167354	0.359923	0.783404	LDL
100010834	3-methylglutarate/2-methylglutarate	Lipid	Fatty Acid, Dicarboxylate	-0.173477	0.428593	0.812672	-0.199605	0.361178	0.784578	LDL
100004635	methionine sulfone	Amino Acid	Methionine, Cysteine, SAM and Taurine Metabolism	-0.169015	0.355105	0.862691	-0.18585	0.308484	0.785167	TC
100002102	N-acetyl-beta-alanine	Nucleotide	Pyrimidine Metabolism, Uracil containing	0.143396	0.433654	0.894537	0.186584	0.306545	0.785167	TC
100009222	1-linoleoyl-2-arachidonoyl-GPE (18:2/20:4)*	Lipid	Phosphatidylethanolamine (PE)	-0.158535	0.439211	0.895257	-0.208205	0.307411	0.785167	TC
1526	1-palmitoyl-2-oleoyl-GPE (16:0/18:1)	Lipid	Phosphatidylethanolamine (PE)	0.061548	0.737902	0.970459	0.18585	0.308484	0.785167	TC
100001178	3-carboxy-4-methyl-5-propyl-2-furanpropanoate (CMPF)	Lipid	Fatty Acid, Dicarboxylate	0.284406	0.114655	0.509215	0.165154	0.366362	0.785476	LDL
800	cysteine	Amino Acid	Methionine, Cysteine, SAM and Taurine Metabolism	-0.228797	0.207827	0.643223	-0.165338	0.365823	0.785476	LDL
100001445	1-palmitoyl-GPA (16:0)	Lipid	Lysophospholipid	-0.232874	0.337336	0.753602	-0.221053	0.36311	0.785476	LDL
100021760	N-acetyl-2-aminoadipate	Amino Acid	Lysine Metabolism	-0.171515	0.347928	0.760313	-0.165888	0.364208	0.785476	LDL
100022475	menthol glucuronide	Xenobiotics	Food Component/Plant	0.172285	0.380668	0.792706	0.17709	0.367319	0.785476	LDL
100004509	S-allylcysteine	Xenobiotics	Food Component/Plant	0.194957	0.384607	0.794565	0.20384	0.362881	0.785476	LDL
100002528	sulfate*	Xenobiotics	Chemical	0.151655	0.40735	0.801188	0.164971	0.366901	0.785476	LDL
100022006	bilirubin degradation product, C17H18N2O4 (2)**	Partially Characterized Molecules	Partially Characterized Molecules	-0.0840903	0.689425	0.915617	-0.188498	0.366864	0.785476	LDL
405	lithocholate	Lipid	Secondary Bile Acid Metabolism	-0.295084	0.220026	0.739108	-0.245614	0.310793	0.788003	TC
100006092	tyramine O-sulfate	Amino Acid	Tyrosine Metabolism	0.218112	0.238499	0.742815	0.1875	0.312472	0.788003	TC
100008957	sphingomyelin (d18:2/24:1, d18:1/24:2)*	Lipid	Sphingomyelins	0.16089	0.379038	0.880942	0.184384	0.312384	0.788003	TC
100009397	1-linoleoyl-2-eicosapentaenoyl-GPC (18:2/20:5)*	Lipid	Phosphatidylcholine (PC)	-0.126152	0.498893	0.912991	-0.1875	0.312472	0.788003	TC
100001777	1-oleoyl-GPI (18:1)	Lipid	Lysophospholipid	0.219858	0.22663	0.739108	0.184018	0.313364	0.788441	TC
100008996	1-palmitoyl-2-palmitoleoyl-GPE (16:0/16:1)*	Lipid	Phosphatidylethanolamine (PE)	0.0982661	0.618854	0.93639	0.196497	0.31626	0.793906	TC
100001730	3,4-dihydroxybutyrate	Lipid	Fatty Acid, Dihydroxy	0.148287	0.417965	0.892748	0.182551	0.317303	0.794706	TC
100000445	theobromine	Xenobiotics	Xanthine Metabolism	0.136415	0.472265	0.911227	0.188432	0.318669	0.796309	TC
100003425	cis-urocanate	Amino Acid	Histidine Metabolism	0.348939	0.396907	0.892305	0.404762	0.319889	0.797541	TC
100020550	deoxycholic acid glucuronide	Lipid	Secondary Bile Acid Metabolism	-0.2544	0.167255	0.593935	-0.163323	0.380003	0.798076	LDL
100008930	oleate/vaccenate (18:1)	Lipid	Long Chain Monounsaturated Fatty Acid	0.224153	0.217457	0.655359	0.160572	0.379993	0.798076	LDL
275	creatinine	Amino Acid	Creatine Metabolism	0.20658	0.256631	0.690011	0.160939	0.378892	0.798076	LDL
362	inosine 5'-monophosphate (IMP)	Nucleotide	Purine Metabolism, (Hypo)Xanthine/Inosine containing	0.313702	0.25487	0.690011	0.246429	0.375951	0.798076	LDL
100001104	N-acetyltyrosine	Amino Acid	Tyrosine Metabolism	0.208821	0.259585	0.693767	0.164533	0.376435	0.798076	LDL
100001229	stearidonate (18:4n3)	Lipid	Long Chain Polyunsaturated Fatty Acid (n3 and n6)	0.181458	0.320258	0.739628	0.159655	0.382754	0.798076	LDL
100009264	glycochenodeoxycholate glucuronide (1)	Lipid	Primary Bile Acid Metabolism	-0.229113	0.345417	0.758069	-0.212281	0.382937	0.798076	LDL
100002849	ethyl glucuronide	Xenobiotics	Chemical	0.369898	0.414105	0.801188	0.392857	0.383317	0.798076	LDL
100015587	1-stearyl-2-docosapentaenoyl-GPC (O-18:0/22:5n3)*	Lipid	Plasmalogen	0.14987	0.412958	0.801188	0.161305	0.377792	0.798076	LDL
100015797	heneicosapentaenoate (21:5n3)	Lipid	Long Chain Polyunsaturated Fatty Acid (n3 and n6)	0.153084	0.485583	0.837212	0.190711	0.383397	0.798076	LDL
536	2'-deoxyuridine	Nucleotide	Pyrimidine Metabolism, Uracil containing	-0.203892	0.525027	0.852005	-0.27972	0.378569	0.798076	LDL
358	hypotaurine	Amino Acid	Methionine, Cysteine, SAM and Taurine Metabolism	0.222439	0.565121	0.862994	0.333333	0.380713	0.798076	LDL
100021707	3-bromo-5-chloro-2,6-dihydroxybenzoic acid*	Xenobiotics	Chemical	0.109016	0.596027	0.87573	0.179487	0.380295	0.798076	LDL
100006056	N-formylphenylalanine	Amino Acid	Tyrosine Metabolism	0.108293	0.712497	0.926805	0.257143	0.374812	0.798076	LDL
100020215	N-methylhydroxyproline**	Amino Acid	Urea cycle; Arginine and Proline Metabolism	0.128465	0.51473	0.851672	0.170772	0.38493	0.798634	LDL
100001843	gamma-glutamylalanine	Peptide	Gamma-glutamyl Amino Acid	0.144468	0.732868	0.926942	0.357143	0.385121	0.798634	LDL
100001040	1-linoleoylglycerol (18:2)	Lipid	Monoacylglycerol	0.395371	0.0844525	0.590092	0.233083	0.322678	0.800052	TC
100001605	catechol sulfate	Xenobiotics	Benzoate Metabolism	-0.223572	0.218682	0.739108	-0.179619	0.325272	0.800052	TC
100015793	sphingomyelin (d17:2/16:0, d18:2/15:0)*	Lipid	Sphingomyelins	0.209372	0.250115	0.746756	0.179619	0.325272	0.800052	TC
100002528	sulfate*	Xenobiotics	Chemical	0.182265	0.318074	0.806401	0.180352	0.323268	0.800052	TC
100006293	sphingomyelin (d18:1/20:2, d18:2/20:1, d16:1/22:2)*	Lipid	Sphingomyelins	0.118406	0.518646	0.912991	0.179985	0.324269	0.800052	TC
213	N6-methyladenosine	Nucleotide	Purine Metabolism, Adenine containing	-0.0402607	0.86617	0.991287	-0.233083	0.322678	0.800052	TC
100006082	4-hydroxychlorothalonil	Xenobiotics	Chemical	0.329299	0.0657108	0.444968	0.158372	0.38664	0.800271	LDL
100005864	methyl glucopyranoside (alpha + beta)	Xenobiotics	Food Component/Plant	0.183762	0.331027	0.830976	0.184872	0.328062	0.800302	TC
100002105	stearamide (18:0)	Lipid	Fatty Acid, Amide	0.166998	0.360962	0.862691	0.178519	0.328292	0.800302	TC
100001337	linolenate [alpha or gamma; (18:3n3 or 6)]	Lipid	Long Chain Polyunsaturated Fatty Acid (n3 and n6)	0.154421	0.398747	0.892748	0.178886	0.327283	0.800302	TC
100009162	1-(1-enyl-palmitoyl)-2-palmitoyl-GPC (P-16:0/16:0)*	Lipid	Plasmalogen	0.144288	0.430768	0.894537	0.178519	0.328292	0.800302	TC
100001064	glycolithocholate	Lipid	Secondary Bile Acid Metabolism	-0.0970983	0.667294	0.902115	-0.193731	0.387663	0.800879	LDL
100005402	11-ketoetiocholanolone glucuronide	Lipid	Androgenic Steroids	0.276004	0.225873	0.739108	0.223377	0.330388	0.803626	TC
100000007	carnitine	Lipid	Carnitine Metabolism	0.169127	0.354782	0.862691	0.177419	0.331329	0.804132	TC
100001618	1-myristoylglycerol (14:0)	Lipid	Monoacylglycerol	-0.713229	0.111564	0.50646	-0.428571	0.396501	0.804381	LDL
100004499	6-oxopiperidine-2-carboxylate	Amino Acid	Lysine Metabolism	0.370176	0.143585	0.567711	0.220588	0.394889	0.804381	LDL
100020378	2-hydroxysebacate	Lipid	Fatty Acid, Dicarboxylate	-0.408994	0.165239	0.591709	-0.258242	0.394284	0.804381	LDL
100006125	vanillic alcohol sulfate	Amino Acid	Tyrosine Metabolism	0.543223	0.265316	0.693767	0.428571	0.396501	0.804381	LDL
100001778	1-linoleoyl-GPI (18:2)*	Lipid	Lysophospholipid	-0.182379	0.317767	0.738375	-0.155989	0.393916	0.804381	LDL
100010925	palmitoyl-arachidonoyl-glycerol (16:0/20:4) [2]*	Lipid	Diacylglycerol	-0.234727	0.381539	0.792706	-0.226471	0.398983	0.804381	LDL
2054	ethylmalonate	Amino Acid	Leucine, Isoleucine and Valine Metabolism	0.146713	0.422979	0.809787	0.155623	0.395042	0.804381	LDL
100009082	1-linoleoyl-GPA (18:2)*	Lipid	Lysophospholipid	-0.367029	0.474178	0.837212	-0.428571	0.396501	0.804381	LDL
100001554	2-arachidonoyl-GPC (20:4)*	Lipid	Lysophospholipid	0.120871	0.517175	0.852005	0.157274	0.398135	0.804381	LDL
100001510	phenol sulfate	Amino Acid	Tyrosine Metabolism	-0.114473	0.532727	0.854387	-0.154156	0.399565	0.804381	LDL
100009141	1-stearoyl-2-docosapentaenoyl-GPC (18:0/22:5n3)*	Lipid	Phosphatidylcholine (PC)	-0.0965473	0.599128	0.87573	-0.154156	0.399565	0.804381	LDL
100003240	N-stearoyltaurine	Lipid	Endocannabinoid	0.121965	0.665007	0.902115	0.239286	0.390379	0.804381	LDL
1488	arachidonoyl ethanolamide	Lipid	Endocannabinoid	0.0820637	0.696558	0.92001	0.176154	0.399624	0.804381	LDL
100008954	palmitoyl dihydrosphingomyelin (d18:0/16:0)*	Lipid	Dihydrosphingomyelins	0.0701284	0.702911	0.922361	0.156723	0.391668	0.804381	LDL
100006260	6-hydroxyindole sulfate	Xenobiotics	Chemical	-0.243951	0.178456	0.613687	-0.153606	0.401269	0.805881	LDL
100002199	tridecenedioate (C13:1-DC)*	Lipid	Fatty Acid, Dicarboxylate	-0.0607801	0.741059	0.926942	0.153423	0.401838	0.805881	LDL
158	5,6-dihydrothymine	Nucleotide	Pyrimidine Metabolism, Thymine containing	0.298524	0.10907	0.504851	0.154411	0.415238	0.806426	LDL
331	gamma-glutamylglutamate	Peptide	Gamma-glutamyl Amino Acid	-0.237962	0.189692	0.628013	-0.149024	0.415629	0.806426	LDL
100001212	guanidinosuccinate	Amino Acid	Guanidino and Acetamido Metabolism	-0.361931	0.203511	0.643223	-0.235165	0.418334	0.806426	LDL
250	biliverdin	Cofactors and Vitamins	Hemoglobin and Porphyrin Metabolism	0.22318	0.219513	0.656145	0.150307	0.41158	0.806426	LDL
407	lysine	Amino Acid	Lysine Metabolism	0.219419	0.227582	0.663632	0.150674	0.410427	0.806426	LDL
1090	bilirubin (Z,Z)	Cofactors and Vitamins	Hemoglobin and Porphyrin Metabolism	0.209929	0.248831	0.679023	0.149757	0.413313	0.806426	LDL
100006641	glycochenodeoxycholate 3-sulfate	Lipid	Primary Bile Acid Metabolism	-0.348836	0.26643	0.693767	-0.258741	0.416775	0.806426	LDL
925	heptanoate (7:0)	Lipid	Medium Chain Fatty Acid	0.362613	0.377349	0.78848	0.333333	0.419753	0.806426	LDL
100021921	succinamic acid	Xenobiotics	Chemical	0.150971	0.409493	0.801188	0.149207	0.41505	0.806426	LDL
100006271	ethylparaben sulfate	Xenobiotics	Chemical	0.280979	0.463928	0.837212	0.316667	0.406397	0.806426	LDL
100015618	palmitoyl-docosahexaenoyl-glycerol (16:0/22:6) [1]*	Lipid	Diacylglycerol	0.168476	0.477682	0.837212	0.191049	0.419749	0.806426	LDL
1218	acetoacetate	Lipid	Ketone Bodies	0.115163	0.530242	0.853531	0.149207	0.41505	0.806426	LDL
100001481	1-docosahexaenoylglycerol (22:6)	Lipid	Monoacylglycerol	-0.201335	0.530349	0.853531	-0.258741	0.416775	0.806426	LDL
100020371	N,N-dimethylalanine	Amino Acid	Alanine and Aspartate Metabolism	-0.110551	0.546945	0.854715	-0.15049	0.411003	0.806426	LDL
100020217	N,N,N-trimethyl-alanylproline betaine (TMAP)	Amino Acid	Urea cycle; Arginine and Proline Metabolism	0.109037	0.552486	0.854833	0.148291	0.417953	0.806426	LDL
100002241	7-methylurate	Xenobiotics	Xanthine Metabolism	0.113046	0.574516	0.86691	0.164225	0.413051	0.806426	LDL
100005864	methyl glucopyranoside (alpha + beta)	Xenobiotics	Food Component/Plant	0.101556	0.593346	0.87573	0.153298	0.418648	0.806426	LDL
100001397	1,3,7-trimethylurate	Xenobiotics	Xanthine Metabolism	0.0996313	0.607103	0.878618	0.158148	0.412579	0.806426	LDL
254	3-hydroxybutyrate (BHBA)	Lipid	Ketone Bodies	0.09071	0.621491	0.888916	0.151773	0.406979	0.806426	LDL
100001472	mead acid (20:3n9)	Lipid	Long Chain Polyunsaturated Fatty Acid (n3 and n6)	-0.117568	0.664554	0.902115	-0.223529	0.405298	0.806426	LDL
100009035	1-pentadecanoyl-2-linoleoyl-GPC (15:0/18:2)*	Lipid	Phosphatidylcholine (PC)	0.0653829	0.722195	0.926805	0.148841	0.41621	0.806426	LDL
100001150	propionylglycine	Lipid	Fatty Acid Metabolism (also BCAA Metabolism)	0.102375	0.793257	0.942905	0.316667	0.406397	0.806426	LDL
100002185	indole-3-carboxylate	Amino Acid	Tryptophan Metabolism	0.0322014	0.886876	0.965182	0.186388	0.406244	0.806426	LDL
100001425	5,6-dihydrouridine	Nucleotide	Pyrimidine Metabolism, Uracil containing	-0.0116231	0.949658	0.98468	-0.151224	0.408701	0.806426	LDL
192	N-acetylputrescine	Amino Acid	Polyamine Metabolism	-0.186272	0.307367	0.728567	-0.147191	0.421453	0.808276	LDL
100015731	N-palmitoyl-heptadecasphingosine (d17:1/16:0)*	Lipid	Ceramides	0.1575	0.389293	0.887307	0.175953	0.335405	0.812228	TC
100000870	saccharin	Xenobiotics	Food Component/Plant	0.251577	0.34726	0.760313	0.214706	0.424559	0.812812	LDL
100001411	beta-guanidinopropanoate	Xenobiotics	Food Component/Plant	0.334536	0.110082	0.50646	0.170435	0.425896	0.813902	LDL
100002514	hydantoin-5-propionate	Amino Acid	Histidine Metabolism	0.133388	0.466737	0.837212	0.145175	0.427911	0.813902	LDL
100021374	branched chain 14:0 dicarboxylic acid**	Lipid	Fatty Acid, Dicarboxylate	0.060191	0.765525	0.931348	0.15906	0.428096	0.813902	LDL
100020417	N6,N6-dimethyllysine	Amino Acid	Lysine Metabolism	0.0519235	0.777769	0.934607	0.145358	0.427322	0.813902	LDL
100005946	2-keto-3-deoxy-gluconate	Xenobiotics	Food Component/Plant	0.274643	0.128202	0.54158	0.142242	0.437401	0.814651	LDL
796	alpha-ketobutyrate	Amino Acid	Methionine, Cysteine, SAM and Taurine Metabolism	0.226378	0.256186	0.690011	0.156007	0.437128	0.814651	LDL
100015727	ceramide (d16:1/24:1, d18:1/22:1)*	Lipid	Ceramides	-0.185081	0.327505	0.74693	-0.148181	0.43453	0.814651	LDL
1242	N1-methyladenosine	Nucleotide	Purine Metabolism, Adenine containing	-0.153922	0.400292	0.797214	-0.144258	0.430865	0.814651	LDL
100001195	docosatrienoate (22:3n3)	Lipid	Long Chain Polyunsaturated Fatty Acid (n3 and n6)	0.168675	0.477156	0.837212	0.186466	0.431195	0.814651	LDL
100009045	phenylacetylglutamate	Peptide	Acetylated Peptides	0.177002	0.468508	0.837212	0.191228	0.432903	0.814651	LDL
100020254	glycine conjugate of C10H14O2 (1)*	Partially Characterized Molecules	Partially Characterized Molecules	-0.13194	0.479239	0.837212	-0.146587	0.431347	0.814651	LDL
100021727	cis-3,4-methyleneheptanoate	Lipid	Fatty Acid, Branched	-0.171212	0.575978	0.867016	-0.236264	0.437084	0.814651	LDL
100009328	furaneol sulfate	Xenobiotics	Food Component/Plant	0.185001	0.633703	0.894022	0.3	0.432845	0.814651	LDL
100001002	EDTA	Xenobiotics	Chemical	-0.0350434	0.848991	0.943972	-0.143158	0.434423	0.814651	LDL
100005371	1-dihomo-linolenoyl-GPE (20:3n3 or 6)*	Lipid	Lysophospholipid	-0.0312665	0.872087	0.955724	-0.150265	0.436546	0.814651	LDL
100002008	5alpha-androstan-3alpha,17alpha-diol monosulfate	Lipid	Androgenic Steroids	0.0144189	0.946685	0.984373	0.167826	0.433117	0.814651	LDL
100001334	N-acetylproline	Amino Acid	Urea cycle; Arginine and Proline Metabolism	0.369707	0.144132	0.567711	0.193627	0.456497	0.81615	LDL
100005351	1-eicosapentaenoyl-GPC (20:5)*	Lipid	Lysophospholipid	0.213258	0.241233	0.67597	0.138209	0.450636	0.81615	LDL
100015841	erucoylcarnitine (C22:1)*	Lipid	Fatty Acid Metabolism (Acyl Carnitine, Monounsaturated)	0.216667	0.277692	0.70011	0.152015	0.449092	0.81615	LDL
1022	picolinate	Amino Acid	Tryptophan Metabolism	-0.195447	0.283716	0.705752	-0.141142	0.44099	0.81615	LDL
100015735	ceramide (d18:1/14:0, d16:1/16:0)*	Lipid	Ceramides	0.1696	0.353419	0.767725	0.136926	0.454892	0.81615	LDL
100001856	1-stearoyl-2-oleoyl-GPE (18:0/18:1)	Lipid	Phosphatidylethanolamine (PE)	0.164166	0.369278	0.783556	0.13601	0.457945	0.81615	LDL
1137	oleoyl ethanolamide	Lipid	Endocannabinoid	0.182829	0.371338	0.784287	0.151821	0.459074	0.81615	LDL
100001413	N4-acetylcytidine	Nucleotide	Pyrimidine Metabolism, Cytidine containing	-0.163163	0.37225	0.784287	-0.13546	0.459782	0.81615	LDL
100001777	1-oleoyl-GPI (18:1)	Lipid	Lysophospholipid	0.161867	0.37611	0.78848	0.137109	0.454283	0.81615	LDL
100005402	11-ketoetiocholanolone glucuronide	Lipid	Androgenic Steroids	0.198947	0.387283	0.796047	0.171429	0.457477	0.81615	LDL
100019794	hydroxy-CMPF*	Lipid	Fatty Acid, Dicarboxylate	0.155395	0.395742	0.797214	0.137843	0.45185	0.81615	LDL
100006627	suberoylcarnitine (C8-DC)	Lipid	Fatty Acid Metabolism (Acyl Carnitine, Dicarboxylate)	0.159648	0.408102	0.801188	0.143842	0.456619	0.81615	LDL
100002028	androstenediol (3beta,17beta) monosulfate (1)	Lipid	Androgenic Steroids	0.140673	0.442525	0.828413	0.140225	0.443992	0.81615	LDL
100015744	ceramide (d18:2/24:1, d18:1/24:2)*	Lipid	Ceramides	-0.137511	0.452951	0.832307	-0.140592	0.44279	0.81615	LDL
100000997	3-hydroxydecanoate	Lipid	Fatty Acid, Monohydroxy	0.129319	0.480558	0.837212	0.135643	0.459169	0.81615	LDL
100001757	thymol sulfate	Xenobiotics	Food Component/Plant	0.142724	0.468751	0.837212	0.147256	0.454598	0.81615	LDL
100001951	bilirubin (E,Z or Z,E)*	Cofactors and Vitamins	Hemoglobin and Porphyrin Metabolism	0.129137	0.481183	0.837212	0.137659	0.452458	0.81615	LDL
100001990	taurocholenate sulfate*	Lipid	Secondary Bile Acid Metabolism	-0.21154	0.487819	0.837212	-0.230769	0.448127	0.81615	LDL
100005353	1-nonadecanoyl-GPC (19:0)	Lipid	Lysophospholipid	-0.125303	0.494404	0.837212	-0.136743	0.455502	0.81615	LDL
100019968	lyxonate	Carbohydrate	Pentose Metabolism	0.131435	0.473344	0.837212	0.138576	0.449424	0.81615	LDL
100020504	sulfate of piperine metabolite C18H21NO3 (3)*	Xenobiotics	Food Component/Plant	0.14499	0.479756	0.837212	0.157634	0.441849	0.81615	LDL
1268	gamma-glutamylleucine	Peptide	Gamma-glutamyl Amino Acid	0.117314	0.522538	0.852005	0.138026	0.451243	0.81615	LDL
100002911	glycoursodeoxycholate	Lipid	Secondary Bile Acid Metabolism	0.0991041	0.602342	0.87573	0.143064	0.450736	0.81615	LDL
100001571	1-arachidonoyl-GPE (20:4n6)*	Lipid	Lysophospholipid	-0.0829598	0.651701	0.898764	-0.135643	0.459169	0.81615	LDL
100020361	3-amino-2-piperidone	Amino Acid	Urea cycle; Arginine and Proline Metabolism	-0.0735156	0.689257	0.915617	0.141692	0.439194	0.81615	LDL
926	caproate (6:0)	Lipid	Medium Chain Fatty Acid	0.156476	0.711361	0.926805	0.309524	0.455645	0.81615	LDL
100001950	bilirubin (E,E)*	Cofactors and Vitamins	Hemoglobin and Porphyrin Metabolism	0.0618001	0.736866	0.926942	0.141509	0.439792	0.81615	LDL
100002173	1-pentadecanoyl-GPC (15:0)*	Lipid	Lysophospholipid	-0.035895	0.845364	0.943972	-0.137659	0.452458	0.81615	LDL
100001293	N-acetylhistidine	Amino Acid	Histidine Metabolism	-0.010094	0.971519	0.990255	-0.214286	0.443141	0.81615	LDL
100001386	heme	Cofactors and Vitamins	Hemoglobin and Porphyrin Metabolism	0.280677	0.140256	0.566862	0.140887	0.466018	0.817344	LDL
100009075	1-palmitoleoyl-2-linoleoyl-GPC (16:1/18:2)*	Lipid	Phosphatidylcholine (PC)	0.218664	0.293662	0.717963	0.151183	0.470677	0.817344	LDL
397	leucine	Amino Acid	Leucine, Isoleucine and Valine Metabolism	0.176307	0.33442	0.75064	0.132527	0.469645	0.817344	LDL
100020893	2,3-dihydroxy-5-methylthio-4-pentenoate (DMTPA)*	Amino Acid	Methionine, Cysteine, SAM and Taurine Metabolism	0.160261	0.380929	0.792706	0.133077	0.467787	0.817344	LDL
100001279	hyocholate	Lipid	Secondary Bile Acid Metabolism	-0.230813	0.494711	0.837212	-0.245455	0.466922	0.817344	LDL
100021140	levulinoylcarnitine	Xenobiotics	Food Component/Plant	-0.149562	0.54112	0.854715	-0.178947	0.463554	0.817344	LDL
314	behenate (22:0)*	Lipid	Long Chain Saturated Fatty Acid	0.288766	0.578891	0.869922	0.371429	0.468478	0.817344	LDL
100005352	1-eicosenoyl-GPC (20:1)*	Lipid	Lysophospholipid	-0.0858804	0.64025	0.89586	-0.13216	0.470886	0.817344	LDL
100002067	pregnenediol sulfate (C21H34O5S)*	Lipid	Pregnenolone Steroids	0.083141	0.650989	0.898764	0.13381	0.465316	0.817344	LDL
100009123	1-pentadecanoyl-2-docosahexaenoyl-GPC (15:0/22:6)*	Lipid	Phosphatidylcholine (PC)	0.083192	0.650788	0.898764	0.13491	0.461623	0.817344	LDL
100022479	N-lactoyl isoleucine	Amino Acid	Lactoyl Amino Acid	0.103968	0.653803	0.898774	0.168831	0.464423	0.817344	LDL
100020272	dihydroferulic acid sulfate	Xenobiotics	Food Component/Plant	-0.135779	0.658282	0.899365	-0.220083	0.469989	0.817344	LDL
100001765	3-methyladipate	Lipid	Fatty Acid, Dicarboxylate	-0.0676645	0.742586	0.926942	-0.148718	0.46841	0.817344	LDL
100001511	1-palmitoleoyl-GPC (16:1)*	Lipid	Lysophospholipid	-0.0179701	0.922236	0.976666	-0.133077	0.467787	0.817344	LDL
100020372	3-indoleglyoxylic acid	Xenobiotics	Food Component/Plant	0.186497	0.315115	0.802044	0.177419	0.339659	0.817453	TC
100000276	maltotriose	Carbohydrate	Glycogen Metabolism	0.255204	0.340117	0.842877	0.255882	0.33879	0.817453	TC
100010895	2'-O-methylcytidine	Nucleotide	Pyrimidine Metabolism, Cytidine containing	0.143481	0.503585	0.912991	0.203478	0.340261	0.817453	TC
363	myo-inositol	Lipid	Inositol Metabolism	0.0982665	0.592608	0.923257	0.17412	0.340543	0.817453	TC
1539	1-palmitoyl-2-oleoyl-GPC (16:0/18:1)	Lipid	Phosphatidylcholine (PC)	0.205051	0.260246	0.693767	0.131244	0.473995	0.817766	LDL
100003674	prolylglycine	Peptide	Dipeptide	0.171083	0.413543	0.801188	0.150029	0.474111	0.817766	LDL
2029	azelate (C9-DC)	Lipid	Fatty Acid, Dicarboxylate	-0.124066	0.513632	0.851672	-0.136389	0.472351	0.817766	LDL
100001987	5alpha-androstan-3beta,17beta-diol disulfate	Lipid	Androgenic Steroids	0.0767262	0.68696	0.915181	0.135944	0.473811	0.817766	LDL
100002102	N-acetyl-beta-alanine	Nucleotide	Pyrimidine Metabolism, Uracil containing	0.126147	0.491478	0.837212	0.130877	0.475241	0.81843	LDL
100001436	3-ketosphinganine	Lipid	Sphingolipid Synthesis	0.465607	0.17505	0.719214	0.333333	0.346594	0.823018	TC
1538	stearoyl sphingomyelin (d18:1/18:0)	Lipid	Sphingomyelins	0.235674	0.194111	0.730395	0.172287	0.345729	0.823018	TC
100020272	dihydroferulic acid sulfate	Xenobiotics	Food Component/Plant	-0.333553	0.265388	0.761465	-0.285714	0.344	0.823018	TC
100002067	pregnenediol sulfate (C21H34O5S)*	Lipid	Pregnenolone Steroids	0.14716	0.421553	0.892748	0.171921	0.346772	0.823018	TC
100000792	dehydroepiandrosterone sulfate (DHEA-S)	Lipid	Androgenic Steroids	-0.12134	0.508265	0.912991	-0.171188	0.348863	0.823018	TC
310	cystathionine	Amino Acid	Methionine, Cysteine, SAM and Taurine Metabolism	0.115335	0.551327	0.913946	0.180788	0.34798	0.823018	TC
1111	vanillylmandelate (VMA)	Amino Acid	Tyrosine Metabolism	0.0895957	0.625799	0.93674	0.171188	0.348863	0.823018	TC
100001254	N-acetyltryptophan	Amino Acid	Tryptophan Metabolism	0.00510449	0.97788	0.991287	0.171554	0.347817	0.823018	TC
460	phenylalanine	Amino Acid	Phenylalanine Metabolism	0.197408	0.278817	0.70011	0.129594	0.479618	0.823382	LDL
100015731	N-palmitoyl-heptadecasphingosine (d17:1/16:0)*	Lipid	Ceramides	0.0623965	0.734417	0.926942	0.129594	0.479618	0.823382	LDL
100000491	gamma-glutamylphenylalanine	Peptide	Gamma-glutamyl Amino Acid	-0.105047	0.5672	0.862994	-0.128861	0.482128	0.825109	LDL
100002017	5alpha-androstan-3alpha,17beta-diol disulfate	Lipid	Androgenic Steroids	-0.0120945	0.979469	0.993966	0.321429	0.482072	0.825109	LDL
100002761	androsterone glucuronide	Lipid	Androgenic Steroids	-0.0356277	0.851733	0.943972	0.133052	0.483357	0.825923	LDL
100006092	tyramine O-sulfate	Amino Acid	Tyrosine Metabolism	0.172715	0.352824	0.767725	0.130242	0.484965	0.826626	LDL
100006065	cyclo(pro-val)	Peptide	Dipeptide	0.115976	0.527324	0.853531	0.127944	0.485275	0.826626	LDL
100015643	sphingadienine	Lipid	Sphingolipid Synthesis	0.166652	0.495306	0.837212	0.170175	0.4861	0.826746	LDL
144	4-hydroxyphenylacetate	Amino Acid	Phenylalanine Metabolism	0.479021	0.229773	0.740662	0.380952	0.351813	0.828194	TC
100001436	3-ketosphinganine	Lipid	Sphingolipid Synthesis	0.362764	0.302895	0.728457	0.248485	0.488776	0.828729	LDL
100006171	eugenol sulfate	Xenobiotics	Food Component/Plant	-0.01065	0.962483	0.988294	-0.155888	0.488464	0.828729	LDL
100009134	1-palmityl-2-linoleoyl-GPC (O-16:0/18:2)*	Lipid	Plasmalogen	0.19195	0.29259	0.717963	0.126478	0.490333	0.828806	LDL
100003892	lanthionine	Amino Acid	Methionine, Cysteine, SAM and Taurine Metabolism	-0.18067	0.421047	0.807498	-0.15528	0.490185	0.828806	LDL
100001596	2-methylmalonylcarnitine (C4-DC)	Lipid	Fatty Acid Metabolism (also BCAA Metabolism)	-0.26016	0.31323	0.802044	-0.240196	0.353089	0.829418	TC
100001856	1-stearoyl-2-oleoyl-GPE (18:0/18:1)	Lipid	Phosphatidylethanolamine (PE)	0.160019	0.381656	0.88363	0.168622	0.356243	0.829721	TC
815	tyrosine	Amino Acid	Tyrosine Metabolism	-0.150799	0.410033	0.892748	-0.168988	0.355183	0.829721	TC
100001150	propionylglycine	Lipid	Fatty Acid Metabolism (also BCAA Metabolism)	0.165198	0.671021	0.955585	0.35	0.35582	0.829721	TC
100001674	2-arachidonoyl-GPE (20:4)*	Lipid	Lysophospholipid	-0.115288	0.735706	0.970035	-0.309091	0.355028	0.829721	TC
100003641	valylglycine	Peptide	Dipeptide	0.215932	0.279364	0.769609	0.183761	0.358874	0.830103	TC
1537	1-palmitoyl-2-linoleoyl-GPC (16:0/18:2)	Lipid	Phosphatidylcholine (PC)	0.138687	0.449057	0.907057	0.167522	0.359434	0.830103	TC
100015840	dihomo-linolenoylcarnitine (C20:3n3 or 6)*	Lipid	Fatty Acid Metabolism (Acyl Carnitine, Polyunsaturated)	-0.131613	0.472741	0.911227	-0.167889	0.358368	0.830103	TC
100001313	gamma-glutamylmethionine	Peptide	Gamma-glutamyl Amino Acid	0.004212	0.981747	0.991818	0.167889	0.358368	0.830103	TC
342	glycocholate	Lipid	Primary Bile Acid Metabolism	-0.185972	0.308163	0.728567	-0.125561	0.493508	0.832889	LDL
100021261	leucylhydroxyproline*	Peptide	Dipeptide Derivative	-0.100028	0.58596	0.923257	-0.166789	0.361571	0.833284	TC
100010869	2,3-dihydroxy-2-methylbutyrate	Amino Acid	Leucine, Isoleucine and Valine Metabolism	-0.123654	0.564847	0.862994	-0.146087	0.495783	0.835444	LDL
100006726	linoleoyl ethanolamide	Lipid	Endocannabinoid	0.411052	0.162913	0.691773	0.269231	0.373733	0.83809	TC
100001552	1-dihomo-linolenoyl-GPC (20:3n3 or 6)*	Lipid	Lysophospholipid	0.232579	0.200204	0.730395	0.160924	0.378936	0.83809	TC
100001946	cyclo(gly-pro)	Peptide	Dipeptide	0.291519	0.225912	0.739108	0.214035	0.378924	0.83809	TC
100002466	cysteinylglycine disulfide*	Amino Acid	Glutathione Metabolism	0.219043	0.228401	0.739108	0.164223	0.369109	0.83809	TC
100003258	2-O-methylascorbic acid	Cofactors and Vitamins	Ascorbate and Aldarate Metabolism	0.206961	0.255736	0.750615	0.16129	0.377837	0.83809	TC
100000010	3-phenylpropionate (hydrocinnamate)	Xenobiotics	Benzoate Metabolism	0.173099	0.369202	0.872877	0.170936	0.375306	0.83809	TC
100001409	N1-methylinosine	Nucleotide	Purine Metabolism, (Hypo)Xanthine/Inosine containing	0.158583	0.386	0.887307	0.162757	0.373458	0.83809	TC
100020743	1-nonadecenoyl-GPC (19:1)*	Lipid	Lysophospholipid	0.172117	0.421273	0.892748	0.190435	0.372753	0.83809	TC
100001167	pro-hydroxy-pro	Amino Acid	Urea cycle; Arginine and Proline Metabolism	-0.142907	0.443125	0.897158	-0.165323	0.374117	0.83809	TC
100006108	phenylacetylcarnitine	Peptide	Acetylated Peptides	-0.137987	0.451372	0.907114	-0.16129	0.377837	0.83809	TC
100009000	1-(1-enyl-palmitoyl)-2-docosahexaenoyl-GPE (P-16:0/22:6)*	Lipid	Plasmalogen	0.134963	0.461443	0.911227	0.164589	0.368026	0.83809	TC
100009123	1-pentadecanoyl-2-docosahexaenoyl-GPC (15:0/22:6)*	Lipid	Phosphatidylcholine (PC)	0.131153	0.474303	0.911227	0.163856	0.370193	0.83809	TC
888	caprate (10:0)	Lipid	Medium Chain Fatty Acid	0.127955	0.485238	0.912991	0.164956	0.366946	0.83809	TC
100001129	O-acetylhomoserine	Amino Acid	Glycine, Serine and Threonine Metabolism	-0.151268	0.549061	0.913946	-0.223942	0.371686	0.83809	TC
100010917	palmitoyl-oleoyl-glycerol (16:0/18:1) [2]*	Lipid	Diacylglycerol	0.153661	0.555983	0.913946	0.227941	0.378911	0.83809	TC
100021000	hydroxypalmitoyl sphingomyelin (d18:1/16:0(OH))**	Lipid	Sphingomyelins	0.10103	0.582193	0.921596	0.163856	0.370193	0.83809	TC
100001335	eicosenoate (20:1)	Lipid	Long Chain Monounsaturated Fatty Acid	0.0978503	0.594183	0.923257	0.164589	0.368026	0.83809	TC
100010955	perfluorooctanesulfonate (PFOS)	Xenobiotics	Chemical	0.0963883	0.599732	0.926629	0.165689	0.36479	0.83809	TC
1023	sarcosine	Amino Acid	Glycine, Serine and Threonine Metabolism	0.0825226	0.653423	0.950076	0.164589	0.368026	0.83809	TC
100006121	1-dihomo-linolenylglycerol (20:3)	Lipid	Monoacylglycerol	0.094923	0.769184	0.979096	0.27972	0.378569	0.83809	TC
100001658	taurolithocholate 3-sulfate	Lipid	Secondary Bile Acid Metabolism	-0.080632	0.683364	0.957789	-0.172414	0.380308	0.839432	TC
100015591	phosphatidylcholine (16:0/20:4n3; 18:1/18:3n6)*	Lipid	Phosphatidylcholine (PC)	0.326694	0.275945	0.763654	0.263736	0.383937	0.840898	TC
1136	valerate (5:0)	Lipid	Short Chain Fatty Acid	0.369384	0.414805	0.892748	0.392857	0.383317	0.840898	TC
100004046	N-acetylcarnosine	Amino Acid	Histidine Metabolism	0.15092	0.409653	0.892748	0.159091	0.384461	0.840898	TC
563	glutamine	Amino Acid	Glutamate Metabolism	-0.131574	0.472873	0.911227	-0.158724	0.385571	0.840898	TC
100010940	diacylglycerol (16:1/18:2 [2], 16:0/18:3 [1])*	Lipid	Diacylglycerol	-0.123676	0.673585	0.955585	-0.252747	0.383315	0.840898	TC
100021711	decadienedioic acid (C10:2-DC)**	Lipid	Fatty Acid, Dicarboxylate	0.0741107	0.697122	0.964121	0.164405	0.385313	0.840898	TC
100020781	1-nisinoyl-GPC (24:6)*	Lipid	Lysophospholipid	0.279394	0.333353	0.75064	0.195604	0.50275	0.841753	LDL
100001461	1-stearoyl-GPE (18:0)	Lipid	Lysophospholipid	-0.125684	0.49308	0.837212	-0.122079	0.505665	0.841753	LDL
100002376	dexpanthenol	Xenobiotics	Chemical	0.153365	0.65256	0.898764	0.227273	0.501536	0.841753	LDL
100002094	gamma-CEHC	Cofactors and Vitamins	Tocopherol Metabolism	-0.0932715	0.65744	0.899365	-0.139642	0.505578	0.841753	LDL
100004601	1H-indole-7-acetic acid	Xenobiotics	Bacterial/Fungal	0.0921216	0.691256	0.916346	0.153946	0.505244	0.841753	LDL
100009334	palmitoloelycholine	Lipid	Fatty Acid Metabolism (Acyl Choline)	0.0632594	0.744421	0.926942	-0.129573	0.502915	0.841753	LDL
1024	pantothenate	Cofactors and Vitamins	Pantothenate and CoA Metabolism	0.045993	0.802621	0.942905	0.122629	0.503736	0.841753	LDL
100021065	lactobacillic acid	Xenobiotics	Bacterial/Fungal	-0.0618115	0.813691	0.943942	-0.17402	0.50415	0.841753	LDL
100003674	prolylglycine	Peptide	Dipeptide	0.15019	0.473631	0.911227	0.180769	0.387188	0.842748	TC
100009343	1-linoleoyl-2-linolenoyl-GPC (18:2/18:3)*	Lipid	Phosphatidylcholine (PC)	-0.202253	0.302004	0.796477	-0.16913	0.389585	0.844614	TC
100001315	p-cresol sulfate	Xenobiotics	Benzoate Metabolism	-0.120772	0.510267	0.912991	-0.157625	0.388914	0.844614	TC
100009051	1-stearoyl-2-dihomo-linolenoyl-GPC (18:0/20:3n3 or 6)*	Lipid	Phosphatidylcholine (PC)	0.233604	0.198172	0.730395	0.156158	0.393397	0.847852	TC
100001554	2-arachidonoyl-GPC (20:4)*	Lipid	Lysophospholipid	0.136419	0.464309	0.911227	0.159274	0.392086	0.847852	TC
100003169	isoleucylglycine	Peptide	Dipeptide	-0.0585507	0.785807	0.979949	-0.182609	0.393075	0.847852	TC
100002014	5alpha-pregnan-3beta,20alpha-diol monosulfate (2)	Lipid	Progestin Steroids	0.0910945	0.625999	0.93674	0.158468	0.394518	0.848601	TC
100001617	undecanedioate (C11-DC)	Lipid	Fatty Acid, Dicarboxylate	-0.440113	0.235815	0.670938	-0.25	0.51649	0.849192	LDL
100015762	docosatrienoate (22:3n6)*	Lipid	Long Chain Polyunsaturated Fatty Acid (n3 and n6)	0.257673	0.272728	0.696702	0.150433	0.526698	0.849192	LDL
100009146	1-stearoyl-2-adrenoyl-GPC (18:0/22:4)*	Lipid	Phosphatidylcholine (PC)	0.188965	0.300301	0.724021	0.116396	0.525818	0.849192	LDL
100000467	3-indoxyl sulfate	Amino Acid	Tryptophan Metabolism	-0.187753	0.303469	0.728457	-0.117313	0.522542	0.849192	LDL
100002253	cinnamoylglycine	Xenobiotics	Food Component/Plant	-0.191428	0.310892	0.730296	-0.123484	0.515623	0.849192	LDL
100001784	1-palmitoleoyl-GPE (16:1)*	Lipid	Lysophospholipid	-0.175655	0.344562	0.758069	-0.121585	0.514685	0.849192	LDL
207	adenosine 3',5'-cyclic monophosphate (cAMP)	Nucleotide	Purine Metabolism, Adenine containing	-0.273578	0.389562	0.797128	-0.203153	0.526563	0.849192	LDL
100001596	2-methylmalonylcarnitine (C4-DC)	Lipid	Fatty Acid Metabolism (also BCAA Metabolism)	-0.211345	0.415484	0.80244	-0.166667	0.522603	0.849192	LDL
100021220	succinoyltaurine	Amino Acid	Methionine, Cysteine, SAM and Taurine Metabolism	0.148703	0.424655	0.810167	0.118157	0.526695	0.849192	LDL
572	glucose	Carbohydrate	Glycolysis, Gluconeogenesis, and Pyruvate Metabolism	0.140012	0.444693	0.829787	0.119512	0.514719	0.849192	LDL
100003678	prolylproline	Peptide	Dipeptide	-0.195504	0.45206	0.832307	-0.169221	0.516157	0.849192	LDL
100001553	1-dihomo-linoleoyl-GPC (20:2)*	Lipid	Lysophospholipid	0.128093	0.484765	0.837212	0.120246	0.512124	0.849192	LDL
100020515	2-naphthol sulfate	Xenobiotics	Chemical	-0.129292	0.480652	0.837212	-0.119879	0.51342	0.849192	LDL
100008984	1-palmitoyl-2-palmitoleoyl-GPC (16:0/16:1)*	Lipid	Phosphatidylcholine (PC)	0.122151	0.505412	0.846468	0.116946	0.523851	0.849192	LDL
100002989	oleoyl-linoleoyl-glycerol (18:1/18:2) [1]	Lipid	Diacylglycerol	-0.11169	0.542798	0.854715	-0.119329	0.515368	0.849192	LDL
100008993	1-palmitoyl-2-arachidonoyl-GPI (16:0/20:4)*	Lipid	Phosphatidylinositol (PI)	-0.111351	0.550936	0.854715	-0.120778	0.517498	0.849192	LDL
100010896	2'-O-methyluridine	Nucleotide	Pyrimidine Metabolism, Uracil containing	-0.114738	0.546014	0.854715	-0.119911	0.527939	0.849192	LDL
100009054	palmitoleoyl-oleoyl-glycerol (16:1/18:1) [2]*	Lipid	Diacylglycerol	-0.0847832	0.680492	0.912591	-0.130256	0.525933	0.849192	LDL
1023	sarcosine	Amino Acid	Glycine, Serine and Threonine Metabolism	0.0441535	0.810369	0.943744	0.118413	0.518623	0.849192	LDL
330	fumarate	Energy	TCA Cycle	-0.0346906	0.850494	0.943972	-0.11713	0.523196	0.849192	LDL
100008952	1-palmitoleoylglycerol (16:1)*	Lipid	Monoacylglycerol	0.0448016	0.895936	0.969272	0.218182	0.519248	0.849192	LDL
100001562	2-palmitoyl-GPC (16:0)*	Lipid	Lysophospholipid	-0.0233665	0.898989	0.9694	-0.115846	0.527789	0.849192	LDL
1113	4-acetamidobutanoate	Amino Acid	Polyamine Metabolism	0.00924723	0.959939	0.988051	0.116396	0.525818	0.849192	LDL
100008933	3-hydroxystearate	Lipid	Fatty Acid, Monohydroxy	0.255	0.240285	0.742815	0.185771	0.396068	0.849235	TC
100006125	vanillic alcohol sulfate	Amino Acid	Tyrosine Metabolism	0.446862	0.374323	0.878559	0.428571	0.396501	0.849235	TC
100001055	isobutyrylcarnitine (C4)	Amino Acid	Leucine, Isoleucine and Valine Metabolism	0.123485	0.500739	0.912991	0.154692	0.397909	0.849235	TC
100001294	gamma-glutamylglycine	Peptide	Gamma-glutamyl Amino Acid	-0.111584	0.543185	0.913917	-0.154692	0.397909	0.849235	TC
1137	oleoyl ethanolamide	Lipid	Endocannabinoid	0.265567	0.189782	0.730395	0.17265	0.399001	0.84991	TC
100002126	16alpha-hydroxy DHEA 3-sulfate	Lipid	Androgenic Steroids	-0.233386	0.198603	0.730395	-0.153226	0.402451	0.850797	TC
100003678	prolylproline	Peptide	Dipeptide	-0.320959	0.209078	0.735122	-0.215686	0.405741	0.850797	TC
100002154	ergothioneine	Xenobiotics	Food Component/Plant	-0.223393	0.219062	0.739108	-0.153592	0.401313	0.850797	TC
100002868	1-behenoyl-GPC (22:0)	Lipid	Lysophospholipid	-0.259568	0.298266	0.79575	-0.209494	0.404102	0.850797	TC
381	2-aminoadipate	Amino Acid	Lysine Metabolism	0.16839	0.421043	0.892748	0.174615	0.403819	0.850797	TC
100015752	glycosyl-N-(2-hydroxynervonoyl)-sphingosine (d18:1/24:1(2OH))*	Lipid	Hexosylceramides (HCER)	0.123649	0.507517	0.912991	0.154839	0.405572	0.850797	TC
100015850	adrenoylcarnitine (C22:4)*	Lipid	Fatty Acid Metabolism (Acyl Carnitine, Polyunsaturated)	-0.108938	0.573761	0.917516	-0.160591	0.405302	0.850797	TC
100002911	glycoursodeoxycholate	Lipid	Secondary Bile Acid Metabolism	0.0570675	0.764532	0.979096	0.158176	0.403816	0.850797	TC
100002773	solanidine	Xenobiotics	Food Component/Plant	-0.0425441	0.913461	0.991287	-0.316667	0.406397	0.850797	TC
112	3-hydroxy-3-methylglutarate	Lipid	Mevalonate Metabolism	-0.226373	0.212815	0.739108	-0.15066	0.41047	0.852041	TC
100001567	1-palmitoyl-GPE (16:0)	Lipid	Lysophospholipid	-0.221301	0.22352	0.739108	-0.151026	0.409319	0.852041	TC
100006369	N-carbamoylalanine	Amino Acid	Alanine and Aspartate Metabolism	0.225985	0.288323	0.784839	0.175652	0.411651	0.852041	TC
1134	urate	Nucleotide	Purine Metabolism, (Hypo)Xanthine/Inosine containing	0.182183	0.318297	0.806401	0.15066	0.41047	0.852041	TC
100001397	1,3,7-trimethylurate	Xenobiotics	Xanthine Metabolism	0.126249	0.514024	0.912991	0.158621	0.411164	0.852041	TC
100015914	1-lignoceroyl-2-arachidonoyl-GPC (24:0/20:4)*	Lipid	Phosphatidylcholine (PC)	-0.0994862	0.643714	0.942795	-0.175652	0.411651	0.852041	TC
100001613	tetradecanedioate (C14-DC)	Lipid	Fatty Acid, Dicarboxylate	-0.356294	0.160404	0.590481	-0.16309	0.53169	0.852208	LDL
100008915	1-palmitoyl-2-docosahexaenoyl-GPC (16:0/22:6)	Lipid	Phosphatidylcholine (PC)	0.251543	0.1649	0.591709	0.112914	0.538359	0.852208	LDL
100010962	1-palmityl-GPE (O-16:0)*	Lipid	Lysoplasmalogen	-0.324398	0.330414	0.750098	-0.209091	0.537221	0.852208	LDL
100000282	N-acetylglutamate	Amino Acid	Glutamate Metabolism	-0.1499	0.412862	0.801188	-0.113097	0.537696	0.852208	LDL
100009343	1-linoleoyl-2-linolenoyl-GPC (18:2/18:3)*	Lipid	Phosphatidylcholine (PC)	-0.14227	0.470181	0.837212	-0.122075	0.536029	0.852208	LDL
100006361	dopamine 3-O-sulfate	Amino Acid	Tyrosine Metabolism	-0.105888	0.564083	0.862994	-0.113647	0.535707	0.852208	LDL
1136	valerate (5:0)	Lipid	Short Chain Fatty Acid	0.241955	0.601161	0.87573	0.285714	0.534509	0.852208	LDL
100009375	1-linoleoyl-2-docosapentaenyol-GPC (18:2/22:5n3)*	Lipid	Phosphatidylcholine (PC)	-0.148478	0.663058	0.902115	-0.209091	0.537221	0.852208	LDL
100009376	1-(1-enyl-oleoyl)-2-docosahexaenoyl-GPE (P-18:1/22:6)*	Lipid	Plasmalogen	0.0400457	0.827735	0.943972	0.11438	0.533062	0.852208	LDL
272	corticosterone	Lipid	Corticosteroids	-0.0371781	0.899589	0.9694	0.182418	0.532509	0.852208	LDL
100000792	dehydroepiandrosterone sulfate (DHEA-S)	Lipid	Androgenic Steroids	-0.0216993	0.906163	0.972324	-0.114197	0.533722	0.852208	LDL
100021100	tetradecadienedioate (C14:2-DC)*	Lipid	Fatty Acid, Dicarboxylate	0.243404	0.230838	0.666391	0.126154	0.539159	0.852243	LDL
100000409	2-isopropylmalate	Xenobiotics	Food Component/Plant	-0.0206072	0.949316	0.98468	-0.195804	0.541936	0.855401	LDL
491	pyridoxal	Cofactors and Vitamins	Vitamin B6 Metabolism	0.113136	0.537555	0.912991	0.149194	0.415093	0.855934	TC
100001655	1-palmitoyl-GPI (16:0)	Lipid	Lysophospholipid	0.0394419	0.830295	0.987672	0.149194	0.415093	0.855934	TC
275	creatinine	Amino Acid	Creatine Metabolism	0.167114	0.360623	0.862691	0.147727	0.419744	0.859066	TC
100020759	heptadecenamide (17:1)*	Lipid	Fatty Acid, Amide	0.142804	0.435575	0.894537	0.14846	0.417415	0.859066	TC
100000787	N-acetylaspartate (NAA)	Amino Acid	Alanine and Aspartate Metabolism	0.141387	0.44019	0.895257	0.147727	0.419744	0.859066	TC
100006098	3-hydroxypyridine sulfate	Xenobiotics	Chemical	0.04912	0.789492	0.979949	0.148094	0.418579	0.859066	TC
100002253	cinnamoylglycine	Xenobiotics	Food Component/Plant	-0.235227	0.210828	0.736556	-0.152392	0.421439	0.860637	TC
100001402	5-acetylamino-6-formylamino-3-methyluracil	Xenobiotics	Xanthine Metabolism	0.0332846	0.856489	0.98902	0.146994	0.422081	0.860637	TC
100005373	fructosyllysine	Amino Acid	Lysine Metabolism	0.0548249	0.765687	0.931348	0.110714	0.546353	0.861134	LDL
100022009	bilirubin degradation product, C17H20N2O5 (2)**	Partially Characterized Molecules	Partially Characterized Molecules	0.209429	0.258169	0.750615	0.14879	0.424379	0.861157	TC
100004555	benzoylcarnitine*	Xenobiotics	Chemical	0.116114	0.556263	0.913946	0.157088	0.424691	0.861157	TC
565	tryptophan	Amino Acid	Tryptophan Metabolism	0.043715	0.812219	0.984699	0.146628	0.423252	0.861157	TC
799	betaine	Amino Acid	Glycine, Serine and Threonine Metabolism	0.166872	0.361327	0.77735	0.110347	0.54769	0.862004	LDL
100021015	branched-chain fatty acid 18:0 (2)**	Lipid	Fatty Acid, Branched	-0.137034	0.52314	0.852005	-0.128724	0.548871	0.862624	LDL
100001274	N-acetylthreonine	Amino Acid	Glycine, Serine and Threonine Metabolism	0.125582	0.568032	0.863062	0.131423	0.550016	0.863187	LDL
878	fructose	Carbohydrate	Fructose, Mannose and Galactose Metabolism	0.133318	0.466974	0.837212	0.109431	0.551041	0.86356	LDL
100021238	phenylalanylhydroxyproline*	Peptide	Dipeptide	0.162886	0.577952	0.920159	0.230769	0.427336	0.864921	TC
100001654	1-arachidonoyl-GPI (20:4)*	Lipid	Lysophospholipid	0.105261	0.566405	0.916157	0.144795	0.429134	0.865367	TC
100001562	2-palmitoyl-GPC (16:0)*	Lipid	Lysophospholipid	-0.076223	0.678412	0.95587	-0.144795	0.429134	0.865367	TC
100020631	4-methylhexanoylglutamine	Lipid	Fatty Acid Metabolism (Acyl Glutamine)	0.0959417	0.634047	0.894022	0.119371	0.55315	0.865628	LDL
100021208	4-vinylcatechol sulfate	Xenobiotics	Benzoate Metabolism	0.157127	0.520604	0.852005	0.14386	0.556822	0.867661	LDL
100006121	1-dihomo-linolenylglycerol (20:3)	Lipid	Monoacylglycerol	0.11176	0.729495	0.926942	0.188811	0.556737	0.867661	LDL
100021372	2-hydroxy-4-(methylthio)butanoic acid	Amino Acid	Methionine, Cysteine, SAM and Taurine Metabolism	0.0347711	0.850151	0.943972	0.108148	0.555748	0.867661	LDL
437	pelargonate (9:0)	Lipid	Medium Chain Fatty Acid	0.514977	0.155978	0.679001	0.3	0.432845	0.868065	TC
100006642	glycodeoxycholate 3-sulfate	Lipid	Secondary Bile Acid Metabolism	-0.234818	0.543071	0.913917	-0.3	0.432845	0.868065	TC
100001400	1-methylurate	Xenobiotics	Xanthine Metabolism	0.0537752	0.773874	0.979096	0.146371	0.432035	0.868065	TC
100000863	adipate (C6-DC)	Lipid	Fatty Acid, Dicarboxylate	0.112815	0.599686	0.87573	0.125217	0.559899	0.869984	LDL
100009397	1-linoleoyl-2-eicosapentaenoyl-GPC (18:2/20:5)*	Lipid	Phosphatidylcholine (PC)	-0.0211497	0.910086	0.972324	-0.109084	0.559126	0.869984	LDL
1224	cys-gly, oxidized	Amino Acid	Glutathione Metabolism	0.228077	0.2093	0.643223	0.106681	0.561151	0.870696	LDL
100020893	2,3-dihydroxy-5-methylthio-4-pentenoate (DMTPA)*	Amino Acid	Methionine, Cysteine, SAM and Taurine Metabolism	0.142374	0.436972	0.894537	0.142962	0.435061	0.870915	TC
100005403	etiocholanolone glucuronide	Lipid	Androgenic Steroids	0.0711597	0.746962	0.926942	0.127008	0.563611	0.873278	LDL
100002185	indole-3-carboxylate	Amino Acid	Tryptophan Metabolism	0.0603554	0.789615	0.979949	0.174478	0.437402	0.874007	TC
1539	1-palmitoyl-2-oleoyl-GPC (16:0/18:1)	Lipid	Phosphatidylcholine (PC)	0.222543	0.220866	0.739108	0.140396	0.443433	0.874538	TC
100001527	hexanoylglycine	Lipid	Fatty Acid Metabolism (Acyl Glycine)	-0.359891	0.250524	0.746756	-0.237762	0.456801	0.874538	TC
192	N-acetylputrescine	Amino Acid	Polyamine Metabolism	-0.187275	0.304725	0.796477	-0.138196	0.450678	0.874538	TC
158	5,6-dihydrothymine	Nucleotide	Pyrimidine Metabolism, Thymine containing	0.19256	0.307984	0.798719	0.145717	0.442292	0.874538	TC
100005353	1-nonadecanoyl-GPC (19:0)	Lipid	Lysophospholipid	-0.174403	0.339749	0.842877	-0.139663	0.445841	0.874538	TC
100006627	suberoylcarnitine (C8-DC)	Lipid	Fatty Acid Metabolism (Acyl Carnitine, Dicarboxylate)	0.176067	0.360922	0.862691	0.144828	0.453508	0.874538	TC
100015841	erucoylcarnitine (C22:1)*	Lipid	Fatty Acid Metabolism (Acyl Carnitine, Monounsaturated)	0.185032	0.3555	0.862691	0.153236	0.445414	0.874538	TC
100000406	ribitol	Carbohydrate	Pentose Metabolism	0.164667	0.367797	0.872877	0.13783	0.451892	0.874538	TC
100020631	4-methylhexanoylglutamine	Lipid	Fatty Acid Metabolism (Acyl Glutamine)	0.176304	0.379037	0.880942	0.153236	0.445414	0.874538	TC
100015593	1-stearoyl-2-docosapentaenoyl-GPE (18:0/22:5n6)*	Lipid	Phosphatidylethanolamine (PE)	0.158272	0.386945	0.887307	0.137097	0.454325	0.874538	TC
100022014	bilirubin degradation product, C16H18N2O5 (3)**	Partially Characterized Molecules	Partially Characterized Molecules	0.168747	0.390674	0.887307	0.146689	0.456358	0.874538	TC
1021	5-oxoproline	Amino Acid	Glutathione Metabolism	0.155006	0.396941	0.892305	0.140762	0.442232	0.874538	TC
100001384	1-arachidoyl-GPC (20:0)	Lipid	Lysophospholipid	-0.128901	0.530286	0.912991	0.157607	0.441928	0.874538	TC
100001757	thymol sulfate	Xenobiotics	Food Component/Plant	0.139814	0.477955	0.912991	0.146689	0.456358	0.874538	TC
100005403	etiocholanolone glucuronide	Lipid	Androgenic Steroids	0.153426	0.484597	0.912991	0.166008	0.449036	0.874538	TC
100009030	lactosyl-N-palmitoyl-sphingosine (d18:1/16:0)	Lipid	Lactosylceramides (LCER)	0.126349	0.490777	0.912991	0.13783	0.451892	0.874538	TC
100015797	heneicosapentaenoate (21:5n3)	Lipid	Long Chain Polyunsaturated Fatty Acid (n3 and n6)	0.145758	0.506943	0.912991	0.166008	0.449036	0.874538	TC
100001776	2-linoleoyl-GPE (18:2)*	Lipid	Lysophospholipid	-0.124669	0.63355	0.939195	-0.193627	0.456497	0.874538	TC
100015831	linolenoylcarnitine (C18:3)*	Lipid	Fatty Acid Metabolism (Acyl Carnitine, Polyunsaturated)	-0.0785387	0.669185	0.955585	-0.138196	0.450678	0.874538	TC
100004326	3-acetylphenol sulfate	Xenobiotics	Chemical	-0.110406	0.695275	0.964121	-0.214286	0.443141	0.874538	TC
100001295	gamma-glutamyltryptophan	Peptide	Gamma-glutamyl Amino Acid	0.0586835	0.753841	0.978655	0.143548	0.441061	0.874538	TC
302	deoxycholate	Lipid	Secondary Bile Acid Metabolism	0.0720246	0.776406	0.979096	0.190918	0.447931	0.874538	TC
1518	N-palmitoyl-sphingosine (d18:1/16:0)	Lipid	Ceramides	0.00545987	0.976341	0.991287	0.141129	0.441032	0.874538	TC
100000008	benzoate	Xenobiotics	Benzoate Metabolism	0.00749416	0.985949	0.993924	-0.309524	0.455645	0.874538	TC
100008991	1-palmitoyl-2-docosahexaenoyl-GPE (16:0/22:6)*	Lipid	Phosphatidylethanolamine (PE)	0.228882	0.207652	0.643223	0.105398	0.565897	0.87541	LDL
100001561	2-palmitoleoyl-GPC (16:1)*	Lipid	Lysophospholipid	-0.204752	0.400424	0.797214	-0.140351	0.566583	0.87541	LDL
100002537	4-hydroxy-2-oxoglutaric acid	Lipid	Fatty Acid, Dicarboxylate	-0.0628557	0.75545	0.978799	-0.148962	0.458356	0.875987	TC
100001999	21-hydroxypregnenolone disulfate	Lipid	Pregnenolone Steroids	-0.36523	0.0865875	0.590312	-0.160079	0.465619	0.876131	TC
93	alpha-ketoglutarate	Energy	TCA Cycle	-0.128981	0.481716	0.912991	-0.133798	0.465358	0.876131	TC
100010919	oleoyl-oleoyl-glycerol (18:1/18:1) [2]*	Lipid	Diacylglycerol	0.123983	0.506363	0.912991	0.136694	0.463403	0.876131	TC
100009376	1-(1-enyl-oleoyl)-2-docosahexaenoyl-GPE (P-18:1/22:6)*	Lipid	Plasmalogen	0.0886688	0.629392	0.936829	0.135264	0.460437	0.876131	TC
100015623	lactosyl-N-behenoyl-sphingosine (d18:1/22:0)*	Lipid	Lactosylceramides (LCER)	0.0705414	0.701242	0.964121	0.134531	0.462894	0.876131	TC
100000900	iminodiacetate (IDA)	Xenobiotics	Chemical	0.0450215	0.806711	0.982285	0.134531	0.462894	0.876131	TC
100001064	glycolithocholate	Lipid	Secondary Bile Acid Metabolism	0.00844549	0.970245	0.991287	-0.164314	0.464961	0.876131	TC
100002129	pregnenolone sulfate	Lipid	Pregnenolone Steroids	-0.0277863	0.880009	0.991287	0.133798	0.465358	0.876131	TC
100002877	1-(1-enyl-stearoyl)-GPC (P-18:0)*	Lipid	Lysoplasmalogen	0.0142987	0.947129	0.991287	0.158261	0.460149	0.876131	TC
100021104	pregnenetriol disulfate*	Lipid	Pregnenolone Steroids	0.173347	0.417912	0.892748	0.155652	0.467671	0.876723	TC
100004601	1H-indole-7-acetic acid	Xenobiotics	Bacterial/Fungal	0.146538	0.526186	0.912991	0.167532	0.467916	0.876723	TC
100004414	2-hydroxyphytanate*	Lipid	Fatty Acid, Branched	0.0751221	0.704003	0.965364	0.142857	0.468331	0.876723	TC
100002537	4-hydroxy-2-oxoglutaric acid	Lipid	Fatty Acid, Dicarboxylate	-0.00160261	0.99367	0.997357	-0.114774	0.568642	0.877356	LDL
480	proline	Amino Acid	Urea cycle; Arginine and Proline Metabolism	-0.103036	0.574682	0.917651	-0.132331	0.470306	0.877425	TC
100009004	1-(1-enyl-stearoyl)-2-docosahexaenoyl-GPE (P-18:0/22:6)*	Lipid	Plasmalogen	0.0788612	0.667904	0.955585	0.132331	0.470306	0.877425	TC
100006129	vanillactate	Amino Acid	Tyrosine Metabolism	-0.25006	0.274289	0.698133	-0.131169	0.570889	0.879053	LDL
1235	gamma-glutamylhistidine	Peptide	Gamma-glutamyl Amino Acid	0.180481	0.322915	0.741864	0.103932	0.571344	0.879053	LDL
1239	2-hydroxystearate	Lipid	Fatty Acid, Monohydroxy	-0.49088	0.0385906	0.368369	-0.142488	0.572742	0.879666	LDL
100015638	2-hydroxynervonate*	Lipid	Fatty Acid, Monohydroxy	-0.464489	0.0942708	0.481469	-0.164835	0.573346	0.879666	LDL
100000272	allo-threonine	Amino Acid	Glycine, Serine and Threonine Metabolism	0.200904	0.424076	0.810167	0.141383	0.575754	0.879669	LDL
100000257	glucuronate	Carbohydrate	Aminosugar Metabolism	0.0665915	0.717267	0.926805	0.103015	0.574761	0.879669	LDL
100022041	N,N-dimethyl-pro-pro	Peptide	Modified Peptides	0.0226418	0.902106	0.970721	0.102832	0.575445	0.879669	LDL
100004635	methionine sulfone	Amino Acid	Methionine, Cysteine, SAM and Taurine Metabolism	-0.0975078	0.595481	0.87573	-0.101915	0.578873	0.883203	LDL
100002029	androstenediol (3beta,17beta) monosulfate (2)	Lipid	Androgenic Steroids	0.271148	0.234478	0.670938	0.127314	0.582355	0.883601	LDL
1629	taurochenodeoxycholate	Lipid	Primary Bile Acid Metabolism	0.138412	0.449966	0.832307	0.101182	0.581621	0.883601	LDL
405	lithocholate	Lipid	Secondary Bile Acid Metabolism	-0.156225	0.523031	0.852005	-0.135088	0.581362	0.883601	LDL
100000711	4-acetylphenol sulfate	Xenobiotics	Benzoate Metabolism	0.0358338	0.884207	0.963274	0.135088	0.581362	0.883601	LDL
100000808	cysteine s-sulfate	Amino Acid	Methionine, Cysteine, SAM and Taurine Metabolism	-0.277857	0.123619	0.61563	-0.128299	0.484056	0.885015	TC
100009233	palmitoylcholine	Lipid	Fatty Acid Metabolism (Acyl Choline)	0.262562	0.146558	0.669251	0.129399	0.480285	0.885015	TC
100015760	linoleoylcholine*	Lipid	Fatty Acid Metabolism (Acyl Choline)	0.230483	0.204404	0.730395	0.129032	0.48154	0.885015	TC
100009146	1-stearoyl-2-adrenoyl-GPC (18:0/22:4)*	Lipid	Phosphatidylcholine (PC)	0.206407	0.257039	0.750615	0.129399	0.480285	0.885015	TC
100021921	succinamic acid	Xenobiotics	Chemical	0.148169	0.418339	0.892748	0.130499	0.47653	0.885015	TC
100021457	(2-butoxyethoxy)acetic acid	Xenobiotics	Chemical	0.174712	0.425263	0.893158	0.15415	0.482513	0.885015	TC
100001104	N-acetyltyrosine	Amino Acid	Tyrosine Metabolism	0.107733	0.564031	0.913946	0.132258	0.478172	0.885015	TC
100001274	N-acetylthreonine	Amino Acid	Glycine, Serine and Threonine Metabolism	0.12214	0.578769	0.920159	0.15415	0.482513	0.885015	TC
100000272	allo-threonine	Amino Acid	Glycine, Serine and Threonine Metabolism	0.126839	0.615997	0.934823	0.176471	0.483628	0.885015	TC
100001106	1,3-dimethylurate	Xenobiotics	Xanthine Metabolism	0.0930183	0.618694	0.93639	0.131452	0.480883	0.885015	TC
100020417	N6,N6-dimethyllysine	Amino Acid	Lysine Metabolism	0.0819276	0.655767	0.9503	0.130865	0.475282	0.885015	TC
272	corticosterone	Lipid	Corticosteroids	-0.0214899	0.941871	0.991287	0.204396	0.483346	0.885015	TC
100004056	N-methyltaurine	Amino Acid	Methionine, Cysteine, SAM and Taurine Metabolism	0.11946	0.569516	0.916754	0.146154	0.485731	0.886601	TC
100022480	N-lactoyl leucine	Amino Acid	Lactoyl Amino Acid	-0.153702	0.483803	0.837212	-0.119565	0.586859	0.887979	LDL
100015968	carotene diol (3)	Cofactors and Vitamins	Vitamin A Metabolism	-0.104688	0.651551	0.898764	-0.125974	0.586364	0.887979	LDL
100009069	1-(1-enyl-palmitoyl)-2-linoleoyl-GPE (P-16:0/18:2)*	Lipid	Plasmalogen	0.114298	0.533358	0.912991	0.1261	0.491642	0.888519	TC
362	inosine 5'-monophosphate (IMP)	Nucleotide	Purine Metabolism, (Hypo)Xanthine/Inosine containing	0.163258	0.560994	0.913946	0.192857	0.491049	0.888519	TC
100001320	erythronate*	Carbohydrate	Aminosugar Metabolism	0.0743202	0.686027	0.957789	0.1261	0.491642	0.888519	TC
100002173	1-pentadecanoyl-GPC (15:0)*	Lipid	Lysophospholipid	-0.0682223	0.710636	0.967206	-0.126833	0.489106	0.888519	TC
100005466	N-acetyltaurine	Amino Acid	Methionine, Cysteine, SAM and Taurine Metabolism	0.0540419	0.768942	0.979096	0.1261	0.491642	0.888519	TC
100001416	orotidine	Nucleotide	Pyrimidine Metabolism, Orotate containing	0.039112	0.831694	0.987672	0.126466	0.490373	0.888519	TC
100010952	1-stearoyl-2-docosapentaenoyl-GPI (18:0/22:5n3)*	Lipid	Phosphatidylinositol (PI)	0.215325	0.236592	0.670938	0.0976996	0.594754	0.88857	LDL
100009051	1-stearoyl-2-dihomo-linolenoyl-GPC (18:0/20:3n3 or 6)*	Lipid	Phosphatidylcholine (PC)	0.183861	0.313783	0.735513	0.0982495	0.592672	0.88857	LDL
100002951	eicosanedioate (C20-DC)	Lipid	Fatty Acid, Dicarboxylate	-0.2536	0.326022	0.745268	-0.139706	0.592801	0.88857	LDL
100000961	homoarginine	Amino Acid	Urea cycle; Arginine and Proline Metabolism	0.138182	0.450726	0.832307	0.0987994	0.590593	0.88857	LDL
100002009	5alpha-pregnan-3beta,20beta-diol monosulfate (1)	Lipid	Progestin Steroids	-0.141188	0.448688	0.832307	-0.0998084	0.593196	0.88857	LDL
100004541	acisoga	Amino Acid	Polyamine Metabolism	-0.132274	0.4705	0.837212	-0.0965998	0.598928	0.88857	LDL
100009145	1-palmitoyl-2-meadoyl-GPC (16:0/20:3n9)*	Lipid	Phosphatidylcholine (PC)	0.195849	0.467267	0.837212	0.144118	0.594378	0.88857	LDL
100015593	1-stearoyl-2-docosapentaenoyl-GPE (18:0/22:5n6)*	Lipid	Phosphatidylethanolamine (PE)	0.127768	0.48588	0.837212	0.0967831	0.598232	0.88857	LDL
100001555	2-stearoyl-GPC (18:0)*	Lipid	Lysophospholipid	0.09574	0.6022	0.87573	0.0975163	0.595449	0.88857	LDL
100003415	N6-methyllysine	Amino Acid	Lysine Metabolism	0.0985671	0.591471	0.87573	0.0978829	0.59406	0.88857	LDL
100020372	3-indoleglyoxylic acid	Xenobiotics	Food Component/Plant	0.096834	0.604309	0.87573	0.0977921	0.60072	0.88857	LDL
100020541	11beta-hydroxyandrosterone glucuronide	Lipid	Androgenic Steroids	0.090816	0.62706	0.889889	0.0988003	0.596953	0.88857	LDL
100000269	glycerophosphorylcholine (GPC)	Lipid	Phospholipid Metabolism	-0.0630808	0.731611	0.926942	-0.0965998	0.598928	0.88857	LDL
100001193	adrenate (22:4n6)	Lipid	Long Chain Polyunsaturated Fatty Acid (n3 and n6)	0.0562994	0.759567	0.931348	0.0964165	0.599625	0.88857	LDL
100009004	1-(1-enyl-stearoyl)-2-docosahexaenoyl-GPE (P-18:0/22:6)*	Lipid	Plasmalogen	0.0546828	0.766277	0.931348	0.0969664	0.597535	0.88857	LDL
100009205	1-palmitoyl-2-stearoyl-GPE (16:0/18:0)*	Lipid	Phosphatidylethanolamine (PE)	-0.038235	0.884165	0.963274	-0.139706	0.592801	0.88857	LDL
100015837	arachidonoylcarnitine (C20:4)	Lipid	Fatty Acid Metabolism (Acyl Carnitine, Polyunsaturated)	-0.0259333	0.887959	0.965346	-0.0960499	0.60102	0.88857	LDL
100001873	1-stearoyl-2-docosahexaenoyl-GPS (18:0/22:6)*	Lipid	Phosphatidylserine (PS)	0.0854603	0.665459	0.902115	0.102915	0.602273	0.889225	LDL
100003397	trimethylamine N-oxide	Lipid	Phospholipid Metabolism	0.0319008	0.862398	0.951761	0.0955	0.603115	0.88927	LDL
100010916	palmitoyl-oleoyl-glycerol (16:0/18:1) [1]*	Lipid	Diacylglycerol	-0.148968	0.530775	0.853531	-0.123308	0.604509	0.889971	LDL
100005850	3-methylglutarylcarnitine (2)	Amino Acid	Leucine, Isoleucine and Valine Metabolism	0.0451381	0.80622	0.942905	0.0949501	0.605213	0.889971	LDL
827	cytidine	Nucleotide	Pyrimidine Metabolism, Cytidine containing	-0.233003	0.296699	0.793852	0.15415	0.493385	0.890202	TC
100001399	1,7-dimethylurate	Xenobiotics	Xanthine Metabolism	0.00887073	0.962225	0.991287	0.127419	0.494557	0.890852	TC
100001565	2-docosahexaenoyl-GPC (22:6)*	Lipid	Lysophospholipid	0.206147	0.345322	0.851276	0.149209	0.496823	0.891217	TC
100009015	1-(1-enyl-stearoyl)-2-docosahexaenoyl-GPC (P-18:0/22:6)*	Lipid	Plasmalogen	0.115604	0.528658	0.912991	0.124267	0.498009	0.891217	TC
100004552	1-eicosapentaenoyl-GPE (20:5)*	Lipid	Lysophospholipid	0.0790972	0.666967	0.955585	0.124267	0.498009	0.891217	TC
100021726	GlcNAc sulfate conjugate of C21H34O2 steroid**	Partially Characterized Molecules	Partially Characterized Molecules	-0.0637487	0.783682	0.979949	0.157143	0.496334	0.891217	TC
100022003	bilirubin degradation product, C16H18N2O5 (1)**	Partially Characterized Molecules	Partially Characterized Molecules	0.209196	0.267232	0.693767	0.0976749	0.607612	0.892302	LDL
100000808	cysteine s-sulfate	Amino Acid	Methionine, Cysteine, SAM and Taurine Metabolism	-0.17624	0.334606	0.75064	-0.0940335	0.608716	0.892729	LDL
1123	chenodeoxycholate	Lipid	Primary Bile Acid Metabolism	0.0882362	0.688899	0.9587	0.148221	0.49971	0.892804	TC
100021093	taurochenodeoxycholic acid 3-sulfate	Lipid	Secondary Bile Acid Metabolism	0.249748	0.55083	0.854715	0.214286	0.610344	0.893922	LDL
100020504	sulfate of piperine metabolite C18H21NO3 (3)*	Xenobiotics	Food Component/Plant	0.285388	0.157591	0.68062	0.137778	0.502098	0.893936	TC
100001993	pregnenediol disulfate (C21H34O8S2)*	Lipid	Pregnenolone Steroids	0.153525	0.46375	0.911227	0.140769	0.502115	0.893936	TC
100003001	1-(1-enyl-stearoyl)-GPE (P-18:0)*	Lipid	Lysoplasmalogen	-0.109281	0.551591	0.913946	-0.122801	0.503133	0.893936	TC
100015592	1-stearoyl-2-docosapentaenoyl-GPE (18:0/22:5n3)*	Lipid	Phosphatidylethanolamine (PE)	0.0709189	0.699717	0.964121	0.122434	0.504418	0.893936	TC
100006379	C-glycosyltryptophan	Amino Acid	Tryptophan Metabolism	0.0177903	0.923012	0.991287	0.122434	0.504418	0.893936	TC
100006296	sphingomyelin (d18:1/22:2, d18:2/22:1, d16:1/24:2)*	Lipid	Sphingomyelins	0.0617861	0.736923	0.926942	0.093117	0.612228	0.893968	LDL
100000258	glycerol 3-phosphate	Lipid	Glycerolipid Metabolism	-0.0587284	0.749517	0.928014	-0.0927504	0.613635	0.893968	LDL
100001383	1-myristoyl-GPC (14:0)	Lipid	Lysophospholipid	0.00899503	0.961031	0.988051	-0.0927504	0.613635	0.893968	LDL
100003588	phenylalanylglycine	Peptide	Dipeptide	-0.0103671	0.975866	0.993066	-0.172727	0.611542	0.893968	LDL
100006260	6-hydroxyindole sulfate	Xenobiotics	Chemical	-0.15997	0.381805	0.88363	-0.122067	0.505705	0.894771	TC
409	malate	Energy	TCA Cycle	-0.0703001	0.702217	0.964121	-0.121701	0.506993	0.895606	TC
1001	trans-4-hydroxyproline	Amino Acid	Urea cycle; Arginine and Proline Metabolism	0.0934615	0.610907	0.934823	0.121334	0.508283	0.896441	TC
100015759	stearoylcholine*	Lipid	Fatty Acid Metabolism (Acyl Choline)	0.254129	0.160455	0.687655	0.120968	0.509575	0.896706	TC
100022172	perfluorohexanesulfonate (PFHxS)	Xenobiotics	Chemical	-0.114217	0.562777	0.913946	0.129721	0.510595	0.896706	TC
100002015	5alpha-pregnan-diol disulfate	Lipid	Progestin Steroids	-0.0961877	0.791525	0.979949	-0.236364	0.510885	0.896706	TC
100022015	bilirubin degradation product, C16H18N2O5 (4)**	Partially Characterized Molecules	Partially Characterized Molecules	0.106948	0.595455	0.923611	0.131868	0.512045	0.897306	TC
100009184	1-stearoyl-2-dihomo-linolenoyl-GPI (18:0/20:3n3 or 6)*	Lipid	Phosphatidylinositol (PI)	0.14925	0.414913	0.892748	0.119868	0.513459	0.898349	TC
806	dimethylglycine	Amino Acid	Glycine, Serine and Threonine Metabolism	-0.0470367	0.798233	0.942905	-0.0914673	0.618571	0.899963	LDL
100003185	leucylglycine	Peptide	Dipeptide	0.165457	0.670528	0.903648	0.19247	0.619806	0.900566	LDL
100021711	decadienedioic acid (C10:2-DC)**	Lipid	Fatty Acid, Dicarboxylate	0.0143621	0.939956	0.982197	0.094115	0.620822	0.900849	LDL
796	alpha-ketobutyrate	Amino Acid	Methionine, Cysteine, SAM and Taurine Metabolism	0.122925	0.541308	0.913917	0.130647	0.515994	0.901347	TC
100009331	oleoylcholine	Lipid	Fatty Acid Metabolism (Acyl Choline)	0.276776	0.125146	0.61563	0.117669	0.521272	0.901949	TC
1242	N1-methyladenosine	Nucleotide	Purine Metabolism, Adenine containing	-0.117416	0.522172	0.912991	-0.117669	0.521272	0.901949	TC
100002514	hydantoin-5-propionate	Amino Acid	Histidine Metabolism	0.0988331	0.590466	0.923257	0.118402	0.518661	0.901949	TC
100001510	phenol sulfate	Amino Acid	Tyrosine Metabolism	-0.0553592	0.763468	0.979096	-0.117669	0.521272	0.901949	TC
1218	acetoacetate	Lipid	Ketone Bodies	0.0341915	0.852621	0.987672	0.117669	0.521272	0.901949	TC
100020254	glycine conjugate of C10H14O2 (1)*	Partially Characterized Molecules	Partially Characterized Molecules	-0.0106342	0.954723	0.991287	-0.120565	0.518245	0.901949	TC
100001767	pyrraline	Xenobiotics	Food Component/Plant	0.227032	0.435066	0.894537	0.186813	0.522504	0.902208	TC
391	citrulline	Amino Acid	Urea cycle; Arginine and Proline Metabolism	0.107654	0.557566	0.913946	0.116935	0.523889	0.902208	TC
100020004	3-carboxy-4-methyl-5-pentyl-2-furanpropionate (3-CMPFP)**	Lipid	Fatty Acid, Dicarboxylate	-0.0167095	0.927676	0.991287	0.116935	0.523889	0.902208	TC
100001454	3-hydroxydodecanedioate*	Lipid	Fatty Acid, Dicarboxylate	0.0390804	0.846542	0.943972	0.0989011	0.623572	0.903644	LDL
100010918	oleoyl-oleoyl-glycerol (18:1/18:1) [1]*	Lipid	Diacylglycerol	0.095332	0.603755	0.87573	0.0892677	0.62707	0.904796	LDL
923	dihydroorotate	Nucleotide	Pyrimidine Metabolism, Orotate containing	-0.0572984	0.755429	0.930085	-0.089451	0.62636	0.904796	LDL
100002544	4-hydroxyglutamate	Amino Acid	Glutamate Metabolism	0.0130474	0.952884	0.984843	0.106719	0.627922	0.904796	LDL
100002990	oleoyl-linoleoyl-glycerol (18:1/18:2) [2]	Lipid	Diacylglycerol	-0.00904389	0.960819	0.988051	-0.0889011	0.628491	0.904796	LDL
100001593	glutarylcarnitine (C5-DC)	Amino Acid	Lysine Metabolism	-0.00714804	0.969028	0.990255	0.0889011	0.628491	0.904796	LDL
407	lysine	Amino Acid	Lysine Metabolism	0.124911	0.495768	0.912991	0.115836	0.527827	0.906434	TC
880	adenine	Nucleotide	Purine Metabolism, Adenine containing	-0.0976657	0.690802	0.959253	-0.154386	0.527996	0.906434	TC
100000963	homocitrulline	Amino Acid	Urea cycle; Arginine and Proline Metabolism	-0.111642	0.54989	0.854715	-0.0899194	0.630479	0.906469	LDL
171	hypoxanthine	Nucleotide	Purine Metabolism, (Hypo)Xanthine/Inosine containing	0.190931	0.321132	0.740087	0.0928686	0.631831	0.906524	LDL
100002869	1-erucoyl-GPC (22:1)*	Lipid	Lysophospholipid	-0.169585	0.450558	0.832307	-0.107849	0.632846	0.906524	LDL
100001359	aconitate [cis or trans]	Energy	TCA Cycle	0.129363	0.480408	0.837212	0.087618	0.633475	0.906524	LDL
100002103	5-methylthioribose**	Amino Acid	Methionine, Cysteine, SAM and Taurine Metabolism	-0.136878	0.55409	0.856108	-0.11039	0.633823	0.906524	LDL
100002500	formiminoglutamate	Amino Acid	Histidine Metabolism	0.0685182	0.709435	0.966771	0.115103	0.53046	0.907823	TC
100001296	stachydrine	Xenobiotics	Food Component/Plant	-0.0581607	0.751862	0.977243	-0.115103	0.53046	0.907823	TC
100002769	argininate*	Amino Acid	Urea cycle; Arginine and Proline Metabolism	0.0346173	0.855893	0.947442	0.0901101	0.635823	0.9082	LDL
100002773	solanidine	Xenobiotics	Food Component/Plant	-0.218171	0.572801	0.865964	-0.183333	0.63682	0.908441	LDL
100009360	1-oleoyl-2-docosapentaenoyl-GPC (18:1/22:5n3)*	Lipid	Phosphatidylcholine (PC)	-0.0971926	0.596677	0.87573	-0.0865182	0.63776	0.908601	LDL
100001198	myristoleate (14:1n5)	Lipid	Long Chain Monounsaturated Fatty Acid	0.0514571	0.779716	0.979096	0.114736	0.531779	0.908663	TC
100009142	1-stearoyl-2-docosapentaenoyl-GPC (18:0/22:5n6)*	Lipid	Phosphatidylcholine (PC)	0.0595408	0.746165	0.926942	-0.085785	0.640623	0.909239	LDL
100010942	linoleoyl-linoleoyl-glycerol (18:2/18:2) [2]*	Lipid	Diacylglycerol	0.0636413	0.814867	0.943942	0.126471	0.640694	0.909239	LDL
100008996	1-palmitoyl-2-palmitoleoyl-GPE (16:0/16:1)*	Lipid	Phosphatidylethanolamine (PE)	0.0242323	0.902585	0.970721	0.0922403	0.640618	0.909239	LDL
100010896	2'-O-methyluridine	Nucleotide	Pyrimidine Metabolism, Uracil containing	-0.148129	0.434693	0.894537	-0.118131	0.534125	0.910492	TC
100002017	5alpha-androstan-3alpha,17beta-diol disulfate	Lipid	Androgenic Steroids	-0.121185	0.795777	0.979949	0.285714	0.534509	0.910492	TC
100000263	imidazole lactate	Amino Acid	Histidine Metabolism	0.242466	0.18877	0.628013	0.0866935	0.642842	0.911109	LDL
1082	N-acetylleucine	Amino Acid	Leucine, Isoleucine and Valine Metabolism	0.190571	0.383753	0.884406	0.135375	0.537975	0.913558	TC
1143	butyrate/isobutyrate (4:0)	Lipid	Short Chain Fatty Acid	-0.170547	0.616114	0.934823	-0.209091	0.537221	0.913558	TC
100022475	menthol glucuronide	Xenobiotics	Food Component/Plant	0.0724827	0.713963	0.968601	0.120963	0.539775	0.913786	TC
100005384	O-sulfo-tyrosine	Xenobiotics	Chemical	0.00117747	0.994897	0.998736	0.112537	0.539725	0.913786	TC
100001293	N-acetylhistidine	Amino Acid	Histidine Metabolism	0.0226535	0.93613	0.991287	-0.171429	0.541272	0.914908	TC
100002227	4-cholesten-3-one	Lipid	Sterol	-0.21586	0.360696	0.77735	-0.107559	0.65173	0.915175	LDL
100021726	GlcNAc sulfate conjugate of C21H34O2 steroid**	Partially Characterized Molecules	Partially Characterized Molecules	-0.0893867	0.700006	0.92001	0.105195	0.649967	0.915175	LDL
100001272	1-oleoyl-GPC (18:1)	Lipid	Lysophospholipid	-0.0687301	0.708576	0.926469	-0.0835854	0.649242	0.915175	LDL
100009003	1-(1-enyl-oleoyl)-2-linoleoyl-GPE (P-18:1/18:2)*	Lipid	Lysoplasmalogen	0.0870821	0.722974	0.926805	0.110526	0.652386	0.915175	LDL
100009037	1-margaroyl-2-linoleoyl-GPC (17:0/18:2)*	Lipid	Phosphatidylcholine (PC)	0.0670526	0.71539	0.926805	0.0830355	0.651404	0.915175	LDL
100001155	2-methylbutyrylglycine	Amino Acid	Leucine, Isoleucine and Valine Metabolism	0.0816348	0.847613	0.943972	0.190476	0.651401	0.915175	LDL
100002488	isoursodeoxycholate	Lipid	Secondary Bile Acid Metabolism	-0.0375997	0.843624	0.943972	0.0872177	0.646746	0.915175	LDL
100005717	1-palmitoyl-GPG (16:0)*	Lipid	Lysophospholipid	0.00641538	0.972202	0.990255	-0.083952	0.647802	0.915175	LDL
100009332	arachidonoylcholine	Lipid	Fatty Acid Metabolism (Acyl Choline)	0.242634	0.180886	0.721863	0.111804	0.542386	0.915381	TC
100006435	N-acetylglucosamine/N-acetylgalactosamine	Carbohydrate	Aminosugar Metabolism	-0.276814	0.138644	0.655598	-0.111457	0.557628	0.915746	TC
100009333	docosahexaenoylcholine	Lipid	Fatty Acid Metabolism (Acyl Choline)	0.224519	0.216687	0.739108	0.109238	0.551749	0.915746	TC
100001569	1-oleoyl-GPE (18:1)	Lipid	Lysophospholipid	-0.160935	0.378901	0.880942	-0.109604	0.550407	0.915746	TC
439	stearate (18:0)	Lipid	Long Chain Saturated Fatty Acid	0.152352	0.405172	0.892748	0.109604	0.550407	0.915746	TC
100000282	N-acetylglutamate	Amino Acid	Glutamate Metabolism	-0.152243	0.405511	0.892748	-0.108138	0.555785	0.915746	TC
100010928	linoleoyl-docosahexaenoyl-glycerol (18:2/22:6) [1]*	Lipid	Diacylglycerol	0.158846	0.4018	0.892748	0.115462	0.543469	0.915746	TC
100002026	androstenediol (3alpha, 17alpha) monosulfate (2)	Lipid	Androgenic Steroids	0.145826	0.425817	0.893158	0.110337	0.547727	0.915746	TC
98	kynurenate	Amino Acid	Tryptophan Metabolism	0.113718	0.535451	0.912991	0.110704	0.54639	0.915746	TC
180	linoleate (18:2n6)	Lipid	Long Chain Polyunsaturated Fatty Acid (n3 and n6)	0.114179	0.533788	0.912991	0.108504	0.554438	0.915746	TC
1135	ursodeoxycholate	Lipid	Secondary Bile Acid Metabolism	-0.190096	0.515088	0.912991	-0.173626	0.552767	0.915746	TC
100015727	ceramide (d16:1/24:1, d18:1/22:1)*	Lipid	Ceramides	-0.134625	0.478151	0.912991	-0.111457	0.557628	0.915746	TC
825	uracil	Nucleotide	Pyrimidine Metabolism, Uracil containing	-0.12692	0.563882	0.913946	-0.132411	0.546995	0.915746	TC
100019794	hydroxy-CMPF*	Lipid	Fatty Acid, Dicarboxylate	0.0983505	0.59229	0.923257	0.109604	0.550407	0.915746	TC
100005986	sphingomyelin (d18:1/24:1, d18:2/24:0)*	Lipid	Sphingomyelins	0.0656977	0.72091	0.970035	0.108504	0.554438	0.915746	TC
100001948	succinylcarnitine (C4-DC)	Energy	TCA Cycle	-0.0558731	0.761335	0.979096	-0.109238	0.551749	0.915746	TC
240	3-(4-hydroxyphenyl)lactate	Amino Acid	Tyrosine Metabolism	0.0125766	0.945534	0.991287	0.110337	0.547727	0.915746	TC
100020351	N-carbamoylvaline	Amino Acid	Leucine, Isoleucine and Valine Metabolism	-0.0115054	0.95647	0.991287	-0.124615	0.552847	0.915746	TC
100021666	branched-chain, straight-chain, or cyclopropyl 10:1 fatty acid (1)*	Partially Characterized Molecules	Partially Characterized Molecules	0.0288476	0.929087	0.991287	0.188811	0.556737	0.915746	TC
100001456	7-methylguanine	Nucleotide	Purine Metabolism, Guanine containing	0.143743	0.432529	0.894537	0.107405	0.558483	0.915778	TC
100001411	beta-guanidinopropanoate	Xenobiotics	Food Component/Plant	0.248797	0.241063	0.742815	0.125217	0.559899	0.916729	TC
100022172	perfluorohexanesulfonate (PFHxS)	Xenobiotics	Chemical	-0.0572085	0.772464	0.931348	0.0884084	0.654613	0.917128	LDL
100015751	glycosyl ceramide (d18:1/23:1, d17:1/24:1)*	Lipid	Hexosylceramides (HCER)	0.0784143	0.691645	0.916346	0.0881226	0.655662	0.917425	LDL
100001869	1-stearoyl-2-arachidonoyl-GPC (18:0/20:4)	Lipid	Phosphatidylcholine (PC)	0.214261	0.247096	0.67597	0.0828713	0.657614	0.917815	LDL
100004396	3-hydroxyadipate	Lipid	Fatty Acid, Dicarboxylate	0.133083	0.544944	0.854715	0.0978261	0.656998	0.917815	LDL
100020781	1-nisinoyl-GPC (24:6)*	Lipid	Lysophospholipid	0.236566	0.415484	0.892748	0.169231	0.563017	0.919092	TC
1105	alpha-tocopherol	Cofactors and Vitamins	Tocopherol Metabolism	0.0107908	0.953259	0.991287	0.106305	0.562541	0.919092	TC
100015759	stearoylcholine*	Lipid	Fatty Acid Metabolism (Acyl Choline)	0.233755	0.197874	0.637138	0.0808359	0.660079	0.920084	LDL
244	beta-alanine	Nucleotide	Pyrimidine Metabolism, Uracil containing	-0.191454	0.293861	0.717963	-0.0782696	0.670255	0.920194	LDL
279	cystine	Amino Acid	Methionine, Cysteine, SAM and Taurine Metabolism	-0.186603	0.306494	0.728567	-0.0782696	0.670255	0.920194	LDL
100001872	1-stearoyl-2-arachidonoyl-GPS (18:0/20:4)	Lipid	Phosphatidylserine (PS)	0.276229	0.339086	0.754518	0.125275	0.669582	0.920194	LDL
100001612	N-acetyl-aspartyl-glutamate (NAAG)	Amino Acid	Glutamate Metabolism	-0.159585	0.399588	0.797214	-0.0821003	0.666247	0.920194	LDL
100021324	3,5-dichloro-2,6-dihydroxybenzoic acid	Xenobiotics	Chemical	-0.152281	0.405395	0.801188	-0.0780863	0.670984	0.920194	LDL
100001040	1-linoleoylglycerol (18:2)	Lipid	Monoacylglycerol	0.180539	0.44624	0.829787	0.103046	0.66551	0.920194	LDL
100000611	1-palmityl-GPC (O-16:0)	Lipid	Lysoplasmalogen	-0.125808	0.492653	0.837212	-0.0773531	0.673903	0.920194	LDL
100001810	dimethylarginine (SDMA + ADMA)	Amino Acid	Urea cycle; Arginine and Proline Metabolism	0.131568	0.472892	0.837212	0.0771698	0.674633	0.920194	LDL
100001102	dodecanedioate (C12-DC)	Lipid	Fatty Acid, Dicarboxylate	-0.139817	0.545532	0.854715	-0.0987013	0.670361	0.920194	LDL
100006184	2-methoxyresorcinol sulfate	Xenobiotics	Chemical	-0.175922	0.626862	0.889889	-0.151515	0.676065	0.920194	LDL
100008918	1-(1-enyl-stearoyl)-2-arachidonoyl-GPC (P-18:0/20:4)	Lipid	Plasmalogen	0.0884249	0.630339	0.892234	0.0775364	0.673173	0.920194	LDL
100008998	gamma-tocopherol/beta-tocopherol	Cofactors and Vitamins	Tocopherol Metabolism	0.087653	0.633339	0.894022	0.0773531	0.673903	0.920194	LDL
100020853	4-acetylcatechol sulfate (1)	Xenobiotics	Food Component/Plant	-0.168202	0.642293	0.897574	-0.151515	0.676065	0.920194	LDL
1628	glycochenodeoxycholate	Lipid	Primary Bile Acid Metabolism	0.0733002	0.700281	0.92001	0.0823228	0.665395	0.920194	LDL
100008976	1-stearoyl-2-linoleoyl-GPE (18:0/18:2)*	Lipid	Phosphatidylethanolamine (PE)	-0.0433509	0.813756	0.943942	-0.0795527	0.665159	0.920194	LDL
100002873	1-lignoceroyl-GPC (24:0)	Lipid	Lysophospholipid	-0.0314693	0.86654	0.952796	-0.0814598	0.663101	0.920194	LDL
100015831	linolenoylcarnitine (C18:3)*	Lipid	Fatty Acid Metabolism (Acyl Carnitine, Polyunsaturated)	-0.0207433	0.91028	0.972324	-0.0804693	0.661529	0.920194	LDL
100010955	perfluorooctanesulfonate (PFOS)	Xenobiotics	Chemical	0.0198911	0.913952	0.975297	0.0768032	0.676095	0.920194	LDL
100004561	N-formylanthranilic acid	Amino Acid	Tryptophan Metabolism	-0.0124975	0.949673	0.98468	0.0842912	0.669778	0.920194	LDL
100009037	1-margaroyl-2-linoleoyl-GPC (17:0/18:2)*	Lipid	Phosphatidylcholine (PC)	0.114611	0.532228	0.912991	0.105572	0.565254	0.920851	TC
100008954	palmitoyl dihydrosphingomyelin (d18:0/16:0)*	Lipid	Dihydrosphingomyelins	0.046853	0.799005	0.981311	0.105205	0.566613	0.920851	TC
1492	linoleamide (18:2n6)	Lipid	Fatty Acid, Amide	0.0406859	0.843564	0.987672	-0.117949	0.566067	0.920851	TC
100010834	3-methylglutarate/2-methylglutarate	Lipid	Fatty Acid, Dicarboxylate	-0.124098	0.572652	0.917078	-0.125494	0.568305	0.920873	TC
100015837	arachidonoylcarnitine (C20:4)	Lipid	Fatty Acid Metabolism (Acyl Carnitine, Polyunsaturated)	-0.0225764	0.902388	0.991287	-0.104839	0.567973	0.920873	TC
424	palmitate (16:0)	Lipid	Long Chain Saturated Fatty Acid	0.184436	0.312245	0.802044	0.104472	0.569335	0.92118	TC
100021012	5-hydroxymethyl-2-furoylcarnitine*	Xenobiotics	Food Component/Plant	0.319607	0.440295	0.825648	0.166667	0.693239	0.921196	LDL
100001605	catechol sulfate	Xenobiotics	Benzoate Metabolism	-0.126595	0.489929	0.837212	-0.0753368	0.681955	0.921196	LDL
100021472	N-succinyl-phenylalanine	Amino Acid	Phenylalanine Metabolism	-0.217196	0.475978	0.837212	-0.121046	0.693645	0.921196	LDL
100009246	2-methylserine	Amino Acid	Glycine, Serine and Threonine Metabolism	-0.132216	0.502427	0.842756	-0.0791022	0.689072	0.921196	LDL
100001611	3beta,7alpha-dihydroxy-5-cholestenoate	Lipid	Sterol	0.19148	0.572746	0.865964	0.136364	0.689309	0.921196	LDL
100020493	glucuronide of piperine metabolite C17H21NO3 (5)*	Xenobiotics	Food Component/Plant	0.16046	0.583703	0.872374	0.120879	0.680607	0.921196	LDL
197	S-adenosylhomocysteine (SAH)	Amino Acid	Methionine, Cysteine, SAM and Taurine Metabolism	0.0934913	0.636075	0.894815	0.0796497	0.687028	0.921196	LDL
100005350	1-linolenoyl-GPC (18:3)*	Lipid	Lysophospholipid	-0.0723293	0.694029	0.918395	-0.0740537	0.687097	0.921196	LDL
93	alpha-ketoglutarate	Energy	TCA Cycle	-0.0693315	0.706137	0.925487	-0.0722207	0.694466	0.921196	LDL
144	4-hydroxyphenylacetate	Amino Acid	Phenylalanine Metabolism	0.153028	0.71752	0.926805	0.166667	0.693239	0.921196	LDL
821	pseudouridine	Nucleotide	Pyrimidine Metabolism, Uracil containing	0.0652334	0.722805	0.926805	0.0729539	0.691515	0.921196	LDL
338	gluconate	Xenobiotics	Food Component/Plant	0.0594353	0.7466	0.926942	0.0738704	0.687832	0.921196	LDL
1215	N-acetylglucosaminylasparagine	Carbohydrate	Aminosugar Metabolism	-0.062149	0.735433	0.926942	0.0749702	0.683423	0.921196	LDL
100009067	1-stearoyl-2-docosahexaenoyl-GPI (18:0/22:6)*	Lipid	Phosphatidylinositol (PI)	0.0609852	0.740216	0.926942	-0.0733205	0.690041	0.921196	LDL
100002871	1-adrenoyl-GPC (22:4)*	Lipid	Lysophospholipid	0.0562705	0.759687	0.931348	-0.074237	0.686361	0.921196	LDL
100001635	ectoine	Xenobiotics	Chemical	0.0485572	0.798871	0.942905	0.0758621	0.690311	0.921196	LDL
240	3-(4-hydroxyphenyl)lactate	Amino Acid	Tyrosine Metabolism	-0.035224	0.848221	0.943972	0.0751535	0.682689	0.921196	LDL
100001127	pyroglutamylglycine	Peptide	Modified Peptides	0.0353449	0.858286	0.949133	0.0777337	0.694194	0.921196	LDL
100001526	malonylcarnitine	Lipid	Fatty Acid Synthesis	-0.0312551	0.867441	0.952796	-0.0774272	0.678872	0.921196	LDL
100002113	cysteine sulfinic acid	Amino Acid	Methionine, Cysteine, SAM and Taurine Metabolism	-0.0126506	0.945214	0.984262	0.0725873	0.69299	0.921196	LDL
100020513	N-acetylhomocitrulline	Amino Acid	Urea cycle; Arginine and Proline Metabolism	-0.00549984	0.98272	0.995733	-0.10222	0.686501	0.921196	LDL
100006065	cyclo(pro-val)	Peptide	Dipeptide	0.148637	0.416856	0.892748	0.104106	0.570698	0.922026	TC
302	deoxycholate	Lipid	Secondary Bile Acid Metabolism	-0.311007	0.209043	0.643223	-0.0939112	0.710899	0.922238	LDL
100009233	palmitoylcholine	Lipid	Fatty Acid Metabolism (Acyl Choline)	0.229308	0.206784	0.643223	0.0692879	0.706314	0.922238	LDL
1140	gamma-glutamylglutamine	Peptide	Gamma-glutamyl Amino Acid	0.197256	0.279194	0.70011	0.0678215	0.712264	0.922238	LDL
100008992	1-stearoyl-2-docosahexaenoyl-GPE (18:0/22:6)*	Lipid	Phosphatidylethanolamine (PE)	0.185976	0.308152	0.728567	0.0716708	0.696682	0.922238	LDL
100015760	linoleoylcholine*	Lipid	Fatty Acid Metabolism (Acyl Choline)	0.184967	0.310831	0.730296	0.0692879	0.706314	0.922238	LDL
100005716	1-oleoyl-GPG (18:1)*	Lipid	Lysophospholipid	0.327144	0.326097	0.745268	0.127273	0.709215	0.922238	LDL
100008921	1-palmitoyl-2-stearoyl-GPC (16:0/18:0)	Lipid	Phosphatidylcholine (PC)	0.166804	0.361526	0.77735	0.0689213	0.7078	0.922238	LDL
100003641	valylglycine	Peptide	Dipeptide	0.137104	0.495281	0.837212	0.075103	0.709664	0.922238	LDL
100004555	benzoylcarnitine*	Xenobiotics	Chemical	0.11747	0.55163	0.854715	0.0717022	0.716917	0.922238	LDL
100009126	1-arachidoyl-2-arachidonoyl-GPC (20:0/20:4)*	Lipid	Phosphatidylcholine (PC)	0.110379	0.547576	0.854715	0.0659885	0.719725	0.922238	LDL
100021840	2-methoxyhydroquinone sulfate (2)	Xenobiotics	Benzoate Metabolism	0.264335	0.566764	0.862994	0.178571	0.701658	0.922238	LDL
100001006	N-acetylglycine	Amino Acid	Glycine, Serine and Threonine Metabolism	-0.097165	0.596781	0.87573	-0.0702044	0.702604	0.922238	LDL
100004552	1-eicosapentaenoyl-GPE (20:5)*	Lipid	Lysophospholipid	0.0964034	0.599675	0.87573	0.0678215	0.712264	0.922238	LDL
444	ornithine	Amino Acid	Urea cycle; Arginine and Proline Metabolism	-0.0901957	0.623478	0.888916	-0.0661718	0.718977	0.922238	LDL
100005996	octadecenedioylcarnitine (C18:1-DC)*	Lipid	Fatty Acid Metabolism (Acyl Carnitine, Dicarboxylate)	0.0810703	0.659152	0.899365	0.0694712	0.705572	0.922238	LDL
100001384	1-arachidoyl-GPC (20:0)	Lipid	Lysophospholipid	-0.0884601	0.667399	0.902115	0.0796717	0.698842	0.922238	LDL
100001734	N6-acetyllysine	Amino Acid	Lysine Metabolism	0.0745169	0.685239	0.915181	0.0659885	0.719725	0.922238	LDL
100020014	glucuronide of C10H18O2 (7)*	Partially Characterized Molecules	Partially Characterized Molecules	-0.10147	0.698382	0.92001	-0.10049	0.701167	0.922238	LDL
100001207	4-imidazoleacetate	Amino Acid	Histidine Metabolism	-0.0983853	0.716979	0.926805	-0.102941	0.70441	0.922238	LDL
100021105	eicosenedioate (C20:1-DC)*	Lipid	Fatty Acid, Dicarboxylate	-0.0844987	0.723195	0.926805	-0.0857465	0.719265	0.922238	LDL
209	adenosine 5'-monophosphate (AMP)	Nucleotide	Purine Metabolism, Adenine containing	0.060136	0.743712	0.926942	0.0658052	0.720472	0.922238	LDL
100021457	(2-butoxyethoxy)acetic acid	Xenobiotics	Chemical	0.0577817	0.793417	0.942905	0.0810477	0.713156	0.922238	LDL
100001081	2-pyrrolidinone	Amino Acid	Glutamate Metabolism	0.0378829	0.836912	0.943972	0.0667217	0.716737	0.922238	LDL
100002796	cis-4-decenoate (10:1n6)*	Lipid	Medium Chain Fatty Acid	0.0507621	0.851899	0.943972	0.0971303	0.720453	0.922238	LDL
100005372	1-(1-enyl-oleoyl)-GPE (P-18:1)*	Lipid	Lysoplasmalogen	-0.0392434	0.83398	0.943972	0.0697651	0.709202	0.922238	LDL
100015623	lactosyl-N-behenoyl-sphingosine (d18:1/22:0)*	Lipid	Lactosylceramides (LCER)	0.0352153	0.848258	0.943972	0.0663551	0.71823	0.922238	LDL
100000436	glycodeoxycholate	Lipid	Secondary Bile Acid Metabolism	-0.0241616	0.908731	0.972324	-0.08	0.703848	0.922238	LDL
100020487	N-acetyl-isoputreanine	Amino Acid	Polyamine Metabolism	0.0212067	0.908284	0.972324	0.0713042	0.698161	0.922238	LDL
100001731	indoleacetylglutamine	Amino Acid	Tryptophan Metabolism	-0.0118997	0.953992	0.984843	0.0776068	0.706303	0.922238	LDL
112	3-hydroxy-3-methylglutarate	Lipid	Mevalonate Metabolism	0.00723225	0.968664	0.990255	0.0667217	0.716737	0.922238	LDL
100008930	oleate/vaccenate (18:1)	Lipid	Long Chain Monounsaturated Fatty Acid	0.171964	0.34665	0.852636	0.103372	0.573429	0.922362	TC
100009054	palmitoleoyl-oleoyl-glycerol (16:1/18:1) [2]*	Lipid	Diacylglycerol	-0.0825416	0.688518	0.9587	-0.115897	0.572887	0.922362	TC
100003008	2-stearoyl-GPI (18:0)*	Lipid	Lysophospholipid	0.067059	0.720022	0.970035	0.105242	0.573128	0.922362	TC
100009336	eicosapentaenoylcholine	Lipid	Fatty Acid Metabolism (Acyl Choline)	0.262877	0.160474	0.687655	0.106563	0.57516	0.923011	TC
100003185	leucylglycine	Peptide	Dipeptide	0.182973	0.637493	0.939959	0.216667	0.575515	0.923011	TC
100001034	indoleacetate	Amino Acid	Tryptophan Metabolism	-0.117308	0.522558	0.852005	-0.0648886	0.724213	0.92321	LDL
100000773	3-hydroxyoctanoate	Lipid	Fatty Acid, Monohydroxy	-0.132696	0.588132	0.87573	-0.0860026	0.726281	0.92321	LDL
100003008	2-stearoyl-GPI (18:0)*	Lipid	Lysophospholipid	0.0457098	0.807099	0.942905	0.0655308	0.726156	0.92321	LDL
100009329	ascorbic acid 2-sulfate	Cofactors and Vitamins	Ascorbate and Aldarate Metabolism	-0.0362878	0.843693	0.943972	0.0650719	0.723464	0.92321	LDL
100002500	formiminoglutamate	Amino Acid	Histidine Metabolism	0.0306655	0.867679	0.952796	0.064522	0.725711	0.92321	LDL
1442	beta-hydroxyisovalerate	Amino Acid	Leucine, Isoleucine and Valine Metabolism	0.0341756	0.883081	0.963274	0.0824943	0.722219	0.92321	LDL
250	biliverdin	Cofactors and Vitamins	Hemoglobin and Porphyrin Metabolism	0.19257	0.291002	0.790172	0.100073	0.585789	0.925835	TC
100009181	1-stearoyl-2-oleoyl-GPI (18:0/18:1)*	Lipid	Phosphatidylinositol (PI)	0.167977	0.358111	0.862691	0.0989736	0.589935	0.925835	TC
100022008	bilirubin degradation product, C17H20N2O5 (1)**	Partially Characterized Molecules	Partially Characterized Molecules	0.137587	0.452698	0.907114	0.0989736	0.589935	0.925835	TC
100010937	oleoyl-arachidonoyl-glycerol (18:1/20:4) [2]*	Lipid	Diacylglycerol	0.13123	0.474041	0.911227	0.0997067	0.58717	0.925835	TC
100001872	1-stearoyl-2-arachidonoyl-GPS (18:0/20:4)	Lipid	Phosphatidylserine (PS)	0.190654	0.513832	0.912991	0.16044	0.583753	0.925835	TC
100020479	indoleacetoylcarnitine*	Amino Acid	Tryptophan Metabolism	-0.115294	0.529772	0.912991	-0.0989736	0.589935	0.925835	TC
100010916	palmitoyl-oleoyl-glycerol (16:0/18:1) [1]*	Lipid	Diacylglycerol	0.13851	0.560317	0.913946	0.129323	0.586853	0.925835	TC
100020407	enterolactone sulfate	Xenobiotics	Food Component/Plant	-0.219799	0.635805	0.939959	-0.25	0.588724	0.925835	TC
806	dimethylglycine	Amino Acid	Glycine, Serine and Threonine Metabolism	-0.0770542	0.675094	0.955585	-0.0989736	0.589935	0.925835	TC
100003901	2-stearoyl-GPE (18:0)*	Lipid	Lysophospholipid	-0.0983216	0.717155	0.968866	-0.15	0.579249	0.925835	TC
100020515	2-naphthol sulfate	Xenobiotics	Chemical	-0.0582384	0.751541	0.977243	-0.100806	0.583032	0.925835	TC
100001467	N2-methylguanosine	Nucleotide	Purine Metabolism, Guanine containing	-0.0470891	0.848191	0.987672	-0.133333	0.586324	0.925835	TC
100000442	quinate	Xenobiotics	Food Component/Plant	0.00540712	0.976569	0.991287	0.0997067	0.58717	0.925835	TC
100001786	1-palmitoleoyl-GPI (16:1)*	Lipid	Lysophospholipid	0.0248058	0.924712	0.991287	0.144608	0.579755	0.925835	TC
100021105	eicosenedioate (C20:1-DC)*	Lipid	Fatty Acid, Dicarboxylate	-0.0350093	0.883503	0.991287	-0.129323	0.586853	0.925835	TC
100002813	leukotriene B5	Lipid	Eicosanoid	-0.258536	0.417158	0.804258	-0.111888	0.729195	0.925841	LDL
100015735	ceramide (d18:1/14:0, d16:1/16:0)*	Lipid	Ceramides	0.0899495	0.62443	0.93674	0.098607	0.59132	0.926683	TC
100009333	docosahexaenoylcholine	Lipid	Fatty Acid Metabolism (Acyl Choline)	0.200716	0.270677	0.693767	0.0623224	0.734721	0.927356	LDL
100001509	2-methylbutyrylcarnitine (C5)	Amino Acid	Leucine, Isoleucine and Valine Metabolism	-0.251115	0.330946	0.750098	-0.0882353	0.736305	0.927356	LDL
100015923	N-oxalyl glycine (NOG)	Xenobiotics	Food Component/Plant	-0.179376	0.490903	0.837212	-0.0882353	0.736305	0.927356	LDL
50	spermidine	Amino Acid	Polyamine Metabolism	0.118894	0.516912	0.852005	0.0621391	0.735474	0.927356	LDL
100001870	1-palmitoyl-2-linoleoyl-GPE (16:0/18:2)	Lipid	Phosphatidylethanolamine (PE)	-0.0452072	0.805929	0.942905	-0.0621391	0.735474	0.927356	LDL
100015752	glycosyl-N-(2-hydroxynervonoyl)-sphingosine (d18:1/24:1(2OH))*	Lipid	Hexosylceramides (HCER)	0.0185167	0.921243	0.976666	0.0631112	0.735902	0.927356	LDL
100000998	citramalate	Amino Acid	Glutamate Metabolism	0.00381069	0.983486	0.995733	0.0623224	0.734721	0.927356	LDL
100015625	glycosyl-N-behenoyl-sphingadienine (d18:2/22:0)*	Lipid	Hexosylceramides (HCER)	0.191194	0.294531	0.793505	0.0982405	0.592706	0.92753	TC
100001132	pyroglutamylvaline	Peptide	Modified Peptides	0.0956699	0.724503	0.970035	0.144118	0.594378	0.928822	TC
100016005	1-oleyl-2-linoleoyl-GPC (O-18:1/18:2)*	Lipid	Plasmalogen	0.300458	0.198039	0.730395	0.124812	0.600074	0.930827	TC
100000639	1-stearoyl-2-oleoyl-GPS (18:0/18:1)	Lipid	Phosphatidylserine (PS)	-0.211749	0.244657	0.745524	-0.0971408	0.596873	0.930827	TC
1090	bilirubin (Z,Z)	Cofactors and Vitamins	Hemoglobin and Porphyrin Metabolism	0.190388	0.296609	0.793852	0.0960411	0.601053	0.930827	TC
355	histidine	Amino Acid	Histidine Metabolism	0.120548	0.511056	0.912991	0.0956745	0.602449	0.930827	TC
100001951	bilirubin (E,Z or Z,E)*	Cofactors and Vitamins	Hemoglobin and Porphyrin Metabolism	0.109097	0.552266	0.913946	0.0956745	0.602449	0.930827	TC
100002869	1-erucoyl-GPC (22:1)*	Lipid	Lysophospholipid	-0.127638	0.571358	0.916919	-0.119142	0.597436	0.930827	TC
100021198	picolinoylglycine	Lipid	Fatty Acid Metabolism (Acyl Glycine)	0.0420389	0.819299	0.987672	0.0960411	0.601053	0.930827	TC
100021707	3-bromo-5-chloro-2,6-dihydroxybenzoic acid*	Xenobiotics	Chemical	0.0333418	0.871547	0.991287	0.107692	0.600525	0.930827	TC
100001426	3-(3-amino-3-carboxypropyl)uridine*	Nucleotide	Pyrimidine Metabolism, Uracil containing	0.114837	0.531415	0.853531	0.0603061	0.743011	0.931523	LDL
100000626	sphingosine 1-phosphate	Lipid	Sphingosines	0.0929822	0.612745	0.883287	0.060856	0.740747	0.931523	LDL
100008934	2-hydroxylaurate	Lipid	Fatty Acid, Monohydroxy	0.0494511	0.845503	0.943972	-0.0835913	0.741577	0.931523	LDL
100001271	1-stearoyl-GPC (18:0)	Lipid	Lysophospholipid	-0.0147353	0.936203	0.981849	-0.0603061	0.743011	0.931523	LDL
100004208	guaiacol sulfate	Xenobiotics	Benzoate Metabolism	-0.22032	0.225631	0.739108	-0.0927419	0.613668	0.931843	TC
100009134	1-palmityl-2-linoleoyl-GPC (O-16:0/18:2)*	Lipid	Plasmalogen	0.214852	0.23765	0.742815	0.0942082	0.608048	0.931843	TC
100001266	N-acetylarginine	Amino Acid	Urea cycle; Arginine and Proline Metabolism	0.141233	0.440692	0.895257	0.0920088	0.616486	0.931843	TC
100001956	N-methylproline	Amino Acid	Urea cycle; Arginine and Proline Metabolism	0.110294	0.547886	0.913946	0.0927419	0.613668	0.931843	TC
100002021	5alpha-androstan-3beta,17alpha-diol disulfate	Lipid	Androgenic Steroids	0.178876	0.578045	0.920159	0.160839	0.617523	0.931843	TC
100004561	N-formylanthranilic acid	Amino Acid	Tryptophan Metabolism	-0.0946191	0.63199	0.939195	0.0996169	0.614017	0.931843	TC
100020203	3-hydroxystachydrine*	Xenobiotics	Food Component/Plant	-0.0967167	0.668529	0.955585	-0.114625	0.6115	0.931843	TC
100006296	sphingomyelin (d18:1/22:2, d18:2/22:1, d16:1/24:2)*	Lipid	Sphingomyelins	0.0745127	0.685256	0.957789	0.0938416	0.609451	0.931843	TC
100000861	2,3-dihydroxypyridine	Xenobiotics	Food Component/Plant	0.0552611	0.851165	0.987672	0.151648	0.604791	0.931843	TC
1124	citrate	Energy	TCA Cycle	0.0132797	0.942494	0.991287	-0.0949413	0.605246	0.931843	TC
100000265	kynurenine	Amino Acid	Tryptophan Metabolism	0.0241399	0.895663	0.991287	0.0927419	0.613668	0.931843	TC
100001615	octadecanedioate (C18-DC)	Lipid	Fatty Acid, Dicarboxylate	-0.0288863	0.879561	0.991287	-0.0949944	0.617548	0.931843	TC
100002113	cysteine sulfinic acid	Amino Acid	Methionine, Cysteine, SAM and Taurine Metabolism	-0.00733368	0.968224	0.991287	0.0920088	0.616486	0.931843	TC
100002769	argininate*	Amino Acid	Urea cycle; Arginine and Proline Metabolism	0.0316677	0.868061	0.991287	0.098109	0.606009	0.931843	TC
100004318	indolin-2-one	Xenobiotics	Food Component/Plant	-0.0253352	0.892386	0.991287	0.0955645	0.609079	0.931843	TC
100009337	caffeic acid sulfate	Xenobiotics	Food Component/Plant	-0.0130023	0.949734	0.991287	0.104957	0.609861	0.931843	TC
100022006	bilirubin degradation product, C17H18N2O4 (2)**	Partially Characterized Molecules	Partially Characterized Molecules	-0.00478932	0.981873	0.991818	-0.105385	0.616127	0.931843	TC
100009332	arachidonoylcholine	Lipid	Fatty Acid Metabolism (Acyl Choline)	0.210699	0.247059	0.67597	0.0592063	0.747545	0.932367	LDL
100016005	1-oleyl-2-linoleoyl-GPC (O-18:1/18:2)*	Lipid	Plasmalogen	0.235472	0.317599	0.738375	0.0766917	0.747933	0.932367	LDL
100001552	1-dihomo-linolenoyl-GPC (20:3n3 or 6)*	Lipid	Lysophospholipid	0.144017	0.431643	0.815583	0.0592063	0.747545	0.932367	LDL
100001295	gamma-glutamyltryptophan	Peptide	Gamma-glutamyl Amino Acid	0.018521	0.921224	0.976666	0.06049	0.746506	0.932367	LDL
100003001	1-(1-enyl-stearoyl)-GPE (P-18:0)*	Lipid	Lysoplasmalogen	-0.0113433	0.950869	0.984843	-0.0595729	0.746032	0.932367	LDL
100022015	bilirubin degradation product, C16H18N2O5 (4)**	Partially Characterized Molecules	Partially Characterized Molecules	0.0705607	0.72654	0.926942	0.0641026	0.750749	0.933754	LDL
100000976	glycylproline	Peptide	Dipeptide	0.0523825	0.836458	0.943972	0.0805369	0.750731	0.933754	LDL
100001433	1-arachidonylglycerol (20:4)	Lipid	Monoacylglycerol	0.101739	0.718258	0.969163	0.139286	0.620546	0.935081	TC
100020542	11beta-hydroxyetiocholanolone glucuronide*	Lipid	Androgenic Steroids	-0.106943	0.603078	0.87573	-0.0646264	0.753785	0.935409	LDL
100003901	2-stearoyl-GPE (18:0)*	Lipid	Lysophospholipid	-0.0752367	0.781836	0.937349	-0.0852941	0.753465	0.935409	LDL
327	flavin adenine dinucleotide (FAD)	Cofactors and Vitamins	Riboflavin Metabolism	0.194968	0.293234	0.717963	0.0568606	0.761263	0.935887	LDL
100004059	histidine betaine (hercynine)*	Xenobiotics	Food Component/Plant	-0.129854	0.47873	0.837212	-0.0551737	0.764238	0.935887	LDL
100001563	2-myristoyl-GPC (14:0)*	Lipid	Lysophospholipid	-0.117522	0.521795	0.852005	-0.0548071	0.765761	0.935887	LDL
100020203	3-hydroxystachydrine*	Xenobiotics	Food Component/Plant	-0.129184	0.566667	0.862994	-0.0671937	0.766386	0.935887	LDL
100001786	1-palmitoleoyl-GPI (16:1)*	Lipid	Lysophospholipid	-0.14815	0.570403	0.865466	0.0784314	0.76478	0.935887	LDL
100001437	cysteine-glutathione disulfide	Amino Acid	Glutathione Metabolism	0.106034	0.621925	0.888916	-0.0639269	0.766648	0.935887	LDL
100001565	2-docosahexaenoyl-GPC (22:6)*	Lipid	Lysophospholipid	0.0890738	0.686091	0.915181	0.0681818	0.757235	0.935887	LDL
381	2-aminoadipate	Amino Acid	Lysine Metabolism	0.0790169	0.707329	0.925943	0.0623077	0.767325	0.935887	LDL
100001566	1-docosahexaenoyl-GPC (22:6)*	Lipid	Lysophospholipid	0.0463277	0.801213	0.942905	-0.0551737	0.764238	0.935887	LDL
100001614	hexadecanedioate (C16-DC)	Lipid	Fatty Acid, Dicarboxylate	-0.0567555	0.797011	0.942905	0.0681987	0.757177	0.935887	LDL
100000096	4-guanidinobutanoate	Amino Acid	Guanidino and Acetamido Metabolism	0.0371994	0.845268	0.943972	0.0574035	0.763185	0.935887	LDL
100000840	tartronate (hydroxymalonate)	Xenobiotics	Food Component/Plant	0.0306563	0.897911	0.9694	-0.0714554	0.764662	0.935887	LDL
798	adenosine	Nucleotide	Purine Metabolism, Adenine containing	-0.021471	0.907146	0.972324	-0.0570067	0.756637	0.935887	LDL
100008990	1-palmitoyl-2-arachidonoyl-GPE (16:0/20:4)*	Lipid	Phosphatidylethanolamine (PE)	0.0162165	0.929805	0.978959	0.0562735	0.759674	0.935887	LDL
100010923	linoleoyl-arachidonoyl-glycerol (18:2/20:4) [2]*	Lipid	Diacylglycerol	0.0136228	0.941011	0.982197	-0.0542572	0.768047	0.935887	LDL
100001557	2-linoleoyl-GPC (18:2)*	Lipid	Lysophospholipid	0.0065602	0.97206	0.990255	-0.0550459	0.768673	0.935887	LDL
1221	creatine	Amino Acid	Creatine Metabolism	0.00283149	0.995193	0.997357	-0.142857	0.759945	0.935887	LDL
100004329	sphingomyelin (d18:2/16:0, d18:1/16:1)*	Lipid	Sphingomyelins	0.0926447	0.614041	0.934823	0.0905425	0.622138	0.936194	TC
100001226	I-urobilinogen	Cofactors and Vitamins	Hemoglobin and Porphyrin Metabolism	-0.0507198	0.935449	0.991287	0.3	0.623838	0.937466	TC
100001263	1-palmitoyl-GPC (16:0)	Lipid	Lysophospholipid	0.0651905	0.72298	0.926805	-0.053524	0.771098	0.937798	LDL
1104	methyl indole-3-acetate	Xenobiotics	Food Component/Plant	-0.131969	0.49498	0.837212	-0.0559182	0.773264	0.938352	LDL
1001	trans-4-hydroxyproline	Amino Acid	Urea cycle; Arginine and Proline Metabolism	-0.117106	0.52328	0.852005	-0.0531574	0.772624	0.938352	LDL
100009215	1-stearoyl-2-dihomo-linolenoyl-GPE (18:0/20:3n3 or 6)*	Lipid	Phosphatidylethanolamine (PE)	0.146873	0.422468	0.892957	0.0890762	0.627812	0.939141	TC
1869	2-hydroxyhippurate (salicylurate)	Xenobiotics	Benzoate Metabolism	-0.127656	0.493747	0.912991	-0.0903226	0.628941	0.939141	TC
1528	1-palmitoyl-2-linoleoyl-GPI (16:0/18:2)	Lipid	Phosphatidylinositol (PI)	-0.0823575	0.654073	0.950076	-0.0887097	0.629233	0.939141	TC
100000840	tartronate (hydroxymalonate)	Xenobiotics	Food Component/Plant	-0.0697152	0.770244	0.979096	-0.115789	0.626879	0.939141	TC
100001359	aconitate [cis or trans]	Energy	TCA Cycle	-0.034242	0.852406	0.987672	-0.0890762	0.627812	0.939141	TC
100001437	cysteine-glutathione disulfide	Amino Acid	Glutathione Metabolism	0.306466	0.145244	0.669251	0.0878261	0.683215	0.939624	TC
100001334	N-acetylproline	Amino Acid	Urea cycle; Arginine and Proline Metabolism	0.324323	0.204074	0.730395	0.125	0.632641	0.939624	TC
100001620	glycerophosphoethanolamine	Lipid	Phospholipid Metabolism	-0.196906	0.280066	0.769609	-0.0711144	0.698927	0.939624	TC
100002227	4-cholesten-3-one	Lipid	Sterol	-0.229278	0.330864	0.830976	-0.103759	0.663326	0.939624	TC
100022004	bilirubin degradation product, C16H18N2O5 (2)**	Partially Characterized Molecules	Partially Characterized Molecules	0.167261	0.360193	0.862691	0.0766129	0.676855	0.939624	TC
100003271	beta-citrylglutamate	Amino Acid	Glutamate Metabolism	-0.167675	0.367261	0.872877	-0.0879032	0.638195	0.939624	TC
100008915	1-palmitoyl-2-docosahexaenoyl-GPC (16:0/22:6)	Lipid	Phosphatidylcholine (PC)	0.163453	0.371388	0.876156	0.0769795	0.675392	0.939624	TC
100001778	1-linoleoyl-GPI (18:2)*	Lipid	Lysophospholipid	-0.162035	0.37561	0.878559	-0.0883431	0.630656	0.939624	TC
100002679	gamma-carboxyglutamate	Amino Acid	Glutamate Metabolism	-0.159381	0.383585	0.884406	-0.0865103	0.637791	0.939624	TC
100006361	dopamine 3-O-sulfate	Amino Acid	Tyrosine Metabolism	-0.148852	0.416175	0.892748	-0.0744135	0.685654	0.939624	TC
100010869	2,3-dihydroxy-2-methylbutyrate	Amino Acid	Leucine, Isoleucine and Valine Metabolism	-0.176445	0.409511	0.892748	-0.1	0.641993	0.939624	TC
100001006	N-acetylglycine	Amino Acid	Glycine, Serine and Threonine Metabolism	-0.146546	0.423514	0.892957	-0.079912	0.663735	0.939624	TC
1504	oleamide	Lipid	Fatty Acid, Amide	0.162112	0.428819	0.894537	0.0769231	0.708779	0.939624	TC
100001551	1-arachidonoyl-GPC (20:4n6)*	Lipid	Lysophospholipid	0.142192	0.437563	0.894537	0.0700147	0.703372	0.939624	TC
100010962	1-palmityl-GPE (O-16:0)*	Lipid	Lysoplasmalogen	-0.264629	0.431646	0.894537	-0.145455	0.669579	0.939624	TC
100009007	1-(1-enyl-palmitoyl)-2-oleoyl-GPC (P-16:0/18:1)*	Lipid	Plasmalogen	0.13846	0.449808	0.907057	0.0806452	0.660833	0.939624	TC
100000257	glucuronate	Carbohydrate	Aminosugar Metabolism	-0.133714	0.46564	0.911227	-0.079912	0.663735	0.939624	TC
314	behenate (22:0)*	Lipid	Long Chain Saturated Fatty Acid	0.338639	0.511458	0.912991	0.2	0.704	0.939624	TC
460	phenylalanine	Amino Acid	Phenylalanine Metabolism	0.115081	0.530538	0.912991	0.0769795	0.675392	0.939624	TC
100000299	xanthosine	Nucleotide	Purine Metabolism, (Hypo)Xanthine/Inosine containing	0.147085	0.503039	0.912991	0.0849802	0.699851	0.939624	TC
100000616	1-stearoyl-2-arachidonoyl-GPI (18:0/20:4)	Lipid	Phosphatidylinositol (PI)	0.120288	0.511973	0.912991	0.0692815	0.70634	0.939624	TC
100001102	dodecanedioate (C12-DC)	Lipid	Fatty Acid, Dicarboxylate	-0.141968	0.539305	0.912991	-0.102597	0.658097	0.939624	TC
100002873	1-lignoceroyl-GPC (24:0)	Lipid	Lysophospholipid	0.123195	0.509089	0.912991	0.0733871	0.694807	0.939624	TC
100003000	1-(1-enyl-palmitoyl)-GPE (P-16:0)*	Lipid	Lysoplasmalogen	-0.120518	0.511162	0.912991	-0.0718475	0.69597	0.939624	TC
100005352	1-eicosenoyl-GPC (20:1)*	Lipid	Lysophospholipid	-0.12747	0.486907	0.912991	-0.0736804	0.688596	0.939624	TC
100008998	gamma-tocopherol/beta-tocopherol	Cofactors and Vitamins	Tocopherol Metabolism	0.125724	0.492942	0.912991	0.0766129	0.676855	0.939624	TC
100009045	phenylacetylglutamate	Peptide	Acetylated Peptides	0.15286	0.532131	0.912991	0.110526	0.652386	0.939624	TC
100009179	1-palmitoyl-2-docosahexaenoyl-GPI (16:0/22:6)*	Lipid	Phosphatidylinositol (PI)	0.115002	0.530823	0.912991	0.0755132	0.681249	0.939624	TC
100015586	1-palmityl-2-palmitoyl-GPC (O-16:0/16:0)*	Lipid	Plasmalogen	0.125531	0.493614	0.912991	0.0846774	0.644957	0.939624	TC
100020227	pyroglutamylalanine*	Peptide	Modified Peptides	-0.277869	0.505193	0.912991	0.190476	0.651401	0.939624	TC
100021220	succinoyltaurine	Amino Acid	Methionine, Cysteine, SAM and Taurine Metabolism	0.120149	0.5197	0.912991	0.0862903	0.644395	0.939624	TC
100001276	N-acetylisoleucine	Amino Acid	Leucine, Isoleucine and Valine Metabolism	-0.142446	0.560744	0.913946	-0.1	0.683772	0.939624	TC
100000774	phenyllactate (PLA)	Amino Acid	Phenylalanine Metabolism	0.104309	0.569942	0.916754	0.0791789	0.666642	0.939624	TC
100001651	2-oleoyl-GPE (18:1)*	Lipid	Lysophospholipid	-0.139183	0.581768	0.921596	-0.116615	0.644932	0.939624	TC
100001784	1-palmitoleoyl-GPE (16:1)*	Lipid	Lysophospholipid	-0.100466	0.590751	0.923257	-0.0701613	0.707622	0.939624	TC
100021012	5-hydroxymethyl-2-furoylcarnitine*	Xenobiotics	Food Component/Plant	0.228305	0.58657	0.923257	0.166667	0.693239	0.939624	TC
100021667	branched-chain, straight-chain, or cyclopropyl 10:1 fatty acid (2)*	Partially Characterized Molecules	Partially Characterized Molecules	-0.191513	0.596095	0.923611	-0.139394	0.700932	0.939624	TC
100001279	hyocholate	Lipid	Secondary Bile Acid Metabolism	0.178693	0.599098	0.926629	0.127273	0.709215	0.939624	TC
100000436	glycodeoxycholate	Lipid	Secondary Bile Acid Metabolism	-0.10889	0.604375	0.931179	-0.0907692	0.666102	0.939624	TC
100009126	1-arachidoyl-2-arachidonoyl-GPC (20:0/20:4)*	Lipid	Phosphatidylcholine (PC)	0.0924762	0.614689	0.934823	0.0718475	0.69597	0.939624	TC
35	S-1-pyrroline-5-carboxylate	Amino Acid	Glutamate Metabolism	0.0903479	0.62289	0.93674	0.0846774	0.644957	0.939624	TC
818	malonate	Lipid	Fatty Acid Synthesis	0.0942436	0.62677	0.93674	0.0862069	0.656575	0.939624	TC
100002849	ethyl glucuronide	Xenobiotics	Chemical	0.226205	0.625732	0.93674	0.214286	0.644512	0.939624	TC
1004	xanthine	Nucleotide	Purine Metabolism, (Hypo)Xanthine/Inosine containing	0.0868023	0.636652	0.939959	0.068915	0.707826	0.939624	TC
100009019	1-stearyl-2-arachidonoyl-GPC (O-18:0/20:4)*	Lipid	Plasmalogen	0.0855638	0.641487	0.942795	0.0821114	0.655043	0.939624	TC
100019975	hexadecenedioate (C16:1-DC)*	Lipid	Fatty Acid, Dicarboxylate	0.089087	0.652126	0.950076	0.0897646	0.649647	0.939624	TC
100015640	N-palmitoylserine	Lipid	Endocannabinoid	-0.111604	0.659295	0.953052	0.102167	0.686655	0.939624	TC
100001212	guanidinosuccinate	Amino Acid	Guanidino and Acetamido Metabolism	-0.12403	0.672697	0.955585	-0.125275	0.669582	0.939624	TC
100003892	lanthionine	Amino Acid	Methionine, Cysteine, SAM and Taurine Metabolism	0.0954701	0.67257	0.955585	0.0852626	0.70598	0.939624	TC
100001617	undecanedioate (C11-DC)	Lipid	Fatty Acid, Dicarboxylate	-0.162241	0.676651	0.95587	-0.15	0.700094	0.939624	TC
100015744	ceramide (d18:2/24:1, d18:1/24:2)*	Lipid	Ceramides	-0.0703079	0.702186	0.964121	-0.0714809	0.697448	0.939624	TC
572	glucose	Carbohydrate	Glycolysis, Gluconeogenesis, and Pyruvate Metabolism	0.0691305	0.706952	0.966771	0.0700147	0.703372	0.939624	TC
100005996	octadecenedioylcarnitine (C18:1-DC)*	Lipid	Fatty Acid Metabolism (Acyl Carnitine, Dicarboxylate)	0.0673182	0.71431	0.968601	0.0806452	0.660833	0.939624	TC
100002356	(16 or 17)-methylstearate (a19:0 or i19:0)	Lipid	Fatty Acid, Branched	0.0846241	0.715331	0.968788	0.0922078	0.690981	0.939624	TC
100022041	N,N-dimethyl-pro-pro	Peptide	Modified Peptides	-0.0667225	0.716734	0.968866	0.082478	0.653598	0.939624	TC
339	glutarate (C5-DC)	Lipid	Fatty Acid, Dicarboxylate	-0.0650556	0.723531	0.970035	-0.082478	0.653598	0.939624	TC
1235	gamma-glutamylhistidine	Peptide	Gamma-glutamyl Amino Acid	0.0653347	0.722392	0.970035	0.0813783	0.657935	0.939624	TC
100001272	1-oleoyl-GPC (18:1)	Lipid	Lysophospholipid	0.0642052	0.727007	0.970035	0.0835777	0.649272	0.939624	TC
100001734	N6-acetyllysine	Amino Acid	Lysine Metabolism	0.0583713	0.750992	0.977243	0.0872434	0.634933	0.939624	TC
1087	erucate (22:1n9)	Lipid	Long Chain Monounsaturated Fatty Acid	0.0540962	0.776476	0.979096	0.0771969	0.685136	0.939624	TC
100001454	3-hydroxydodecanedioate*	Lipid	Fatty Acid, Dicarboxylate	0.0569879	0.777686	0.979096	0.0799756	0.691709	0.939624	TC
100001561	2-palmitoleoyl-GPC (16:1)*	Lipid	Lysophospholipid	-0.0713431	0.771636	0.979096	-0.0982456	0.689053	0.939624	TC
100009148	1-oleoyl-2-dihomo-linolenoyl-GPC (18:1/20:3)*	Lipid	Phosphatidylcholine (PC)	0.0750441	0.79039	0.979949	0.121429	0.666401	0.939624	TC
100000580	1,5-anhydroglucitol (1,5-AG)	Carbohydrate	Glycolysis, Gluconeogenesis, and Pyruvate Metabolism	-0.0458322	0.803297	0.981311	-0.0718475	0.69597	0.939624	TC
100020371	N,N-dimethylalanine	Amino Acid	Alanine and Aspartate Metabolism	-0.0464009	0.800905	0.981311	-0.0736804	0.688596	0.939624	TC
100002462	5-(galactosylhydroxy)-lysine	Amino Acid	Lysine Metabolism	-0.0527038	0.806781	0.982285	-0.0869565	0.686195	0.939624	TC
100001081	2-pyrrolidinone	Amino Acid	Glutamate Metabolism	-0.0442122	0.810122	0.984699	0.0751466	0.682716	0.939624	TC
849	caffeine	Xenobiotics	Xanthine Metabolism	0.0384293	0.837378	0.987672	0.0794355	0.671	0.939624	TC
100001403	5-acetylamino-6-amino-3-methyluracil	Xenobiotics	Xanthine Metabolism	-0.0418196	0.823247	0.987672	0.0709677	0.704411	0.939624	TC
100005367	N-acetylalliin	Xenobiotics	Food Component/Plant	-0.0731211	0.851701	0.987672	0.166667	0.668231	0.939624	TC
100005717	1-palmitoyl-GPG (16:0)*	Lipid	Lysophospholipid	0.0354808	0.847128	0.987672	-0.0711144	0.698927	0.939624	TC
100009130	1-oleoyl-2-docosahexaenoyl-GPC (18:1/22:6)*	Lipid	Phosphatidylcholine (PC)	0.0349409	0.849427	0.987672	-0.0700147	0.703372	0.939624	TC
100010942	linoleoyl-linoleoyl-glycerol (18:2/18:2) [2]*	Lipid	Diacylglycerol	0.0616938	0.820445	0.987672	0.126471	0.640694	0.939624	TC
100015587	1-stearyl-2-docosapentaenoyl-GPC (O-18:0/22:5n3)*	Lipid	Plasmalogen	0.0381753	0.835669	0.987672	0.0755132	0.681249	0.939624	TC
100015643	sphingadienine	Lipid	Sphingolipid Synthesis	0.0465663	0.849858	0.987672	0.103509	0.673252	0.939624	TC
100001092	trigonelline (N'-methylnicotinate)	Cofactors and Vitamins	Nicotinate and Nicotinamide Metabolism	-0.0339082	0.853829	0.988028	0.0806452	0.660833	0.939624	TC
171	hypoxanthine	Nucleotide	Purine Metabolism, (Hypo)Xanthine/Inosine containing	-0.0147679	0.939393	0.991287	-0.0842365	0.663964	0.939624	TC
254	3-hydroxybutyrate (BHBA)	Lipid	Ketone Bodies	0.0047632	0.979359	0.991287	0.082478	0.653598	0.939624	TC
536	2'-deoxyuridine	Nucleotide	Pyrimidine Metabolism, Uracil containing	-0.0151957	0.962616	0.991287	-0.153846	0.633091	0.939624	TC
826	xylose	Carbohydrate	Pentose Metabolism	0.0454939	0.862355	0.991287	0.120098	0.646143	0.939624	TC
1102	gamma-glutamyltyrosine	Peptide	Gamma-glutamyl Amino Acid	-0.0236258	0.899609	0.991287	-0.0770161	0.680487	0.939624	TC
100000258	glycerol 3-phosphate	Lipid	Glycerolipid Metabolism	-0.00613984	0.973395	0.991287	-0.0821114	0.655043	0.939624	TC
100001466	3-methylcytidine	Nucleotide	Pyrimidine Metabolism, Cytidine containing	0.00580768	0.974834	0.991287	-0.0722141	0.694493	0.939624	TC
100001481	1-docosahexaenoylglycerol (22:6)	Lipid	Monoacylglycerol	0.0410213	0.899275	0.991287	-0.146853	0.648796	0.939624	TC
100001563	2-myristoyl-GPC (14:0)*	Lipid	Lysophospholipid	0.0180896	0.92172	0.991287	0.0762463	0.678318	0.939624	TC
100001868	4-allylphenol sulfate	Xenobiotics	Food Component/Plant	-0.0104453	0.954754	0.991287	-0.0722141	0.694493	0.939624	TC
100001994	androstenediol (3beta,17beta) disulfate (2)	Lipid	Androgenic Steroids	0.0139606	0.946035	0.991287	0.0905983	0.659829	0.939624	TC
100003179	leucylalanine	Peptide	Dipeptide	0.00929144	0.963313	0.991287	0.0842491	0.676093	0.939624	TC
100005418	17alpha-hydroxypregnanolone glucuronide	Lipid	Pregnenolone Steroids	0.0325901	0.885519	0.991287	0.101073	0.654478	0.939624	TC
100008916	1-stearoyl-2-docosahexaenoyl-GPC (18:0/22:6)	Lipid	Phosphatidylcholine (PC)	0.0119393	0.94829	0.991287	-0.0810117	0.659383	0.939624	TC
100015632	N-stearoyl-sphingadienine (d18:2/18:0)*	Lipid	Ceramides	0.00937202	0.959399	0.991287	0.0711144	0.698927	0.939624	TC
100022479	N-lactoyl isoleucine	Amino Acid	Lactoyl Amino Acid	0.0109027	0.96259	0.991287	0.0922078	0.690981	0.939624	TC
100015785	nisinate (24:6n3)	Lipid	Long Chain Polyunsaturated Fatty Acid (n3 and n6)	0.00106007	0.997258	0.998736	-0.131868	0.667608	0.939624	TC
100015785	nisinate (24:6n3)	Lipid	Long Chain Polyunsaturated Fatty Acid (n3 and n6)	0.138653	0.651456	0.898764	-0.0879121	0.775195	0.939657	LDL
100000639	1-stearoyl-2-oleoyl-GPS (18:0/18:1)	Lipid	Phosphatidylserine (PS)	-0.139615	0.445997	0.829787	-0.0522409	0.776445	0.940132	LDL
100008934	2-hydroxylaurate	Lipid	Fatty Acid, Monohydroxy	0.083968	0.740451	0.970459	-0.0939112	0.710899	0.94072	TC
100009259	glycocholate glucuronide (1)	Lipid	Primary Bile Acid Metabolism	-0.0837321	0.843735	0.943972	-0.119048	0.778886	0.942048	LDL
100009345	1-palmitoleoyl-2-linolenoyl-GPC (16:1/18:3)*	Lipid	Phosphatidylcholine (PC)	0.0619094	0.773823	0.979096	-0.0791304	0.713216	0.942648	TC
100002875	1-(1-enyl-palmitoyl)-GPC (P-16:0)*	Lipid	Lysoplasmalogen	0.0111766	0.95159	0.991287	0.0670821	0.71527	0.944225	TC
1526	1-palmitoyl-2-oleoyl-GPE (16:0/18:1)	Lipid	Phosphatidylethanolamine (PE)	-0.043428	0.81343	0.943942	0.0509577	0.781802	0.944534	LDL
100015689	1-palmitoyl-2-(hydroxylinoleoyl)-GPC (16:0/18:2(OH))*	Lipid	Phosphatidylcholine (PC)	0.0350151	0.849111	0.943972	-0.0505911	0.783334	0.945344	LDL
100021100	tetradecadienedioate (C14:2-DC)*	Lipid	Fatty Acid, Dicarboxylate	0.196184	0.336792	0.839683	0.0721368	0.726194	0.946061	TC
100021324	3,5-dichloro-2,6-dihydroxybenzoic acid	Xenobiotics	Chemical	-0.168361	0.356998	0.862691	-0.0656158	0.721244	0.946061	TC
100021472	N-succinyl-phenylalanine	Amino Acid	Phenylalanine Metabolism	-0.220519	0.469086	0.911227	-0.10989	0.72081	0.946061	TC
100001426	3-(3-amino-3-carboxypropyl)uridine*	Nucleotide	Pyrimidine Metabolism, Uracil containing	0.119683	0.514114	0.912991	0.066349	0.718255	0.946061	TC
100001461	1-stearoyl-GPE (18:0)	Lipid	Lysophospholipid	-0.128884	0.48205	0.912991	-0.0645161	0.725735	0.946061	TC
361	inosine	Nucleotide	Purine Metabolism, (Hypo)Xanthine/Inosine containing	0.112427	0.547068	0.913946	0.0649194	0.728615	0.946061	TC
100002952	docosadioate (C22-DC)	Lipid	Fatty Acid, Dicarboxylate	-0.154624	0.669732	0.955585	-0.127273	0.726057	0.946061	TC
100002876	1-(1-enyl-oleoyl)-GPC (P-18:1)*	Lipid	Lysoplasmalogen	0.0528003	0.77787	0.979096	0.066129	0.723753	0.946061	TC
100008990	1-palmitoyl-2-arachidonoyl-GPE (16:0/20:4)*	Lipid	Phosphatidylethanolamine (PE)	0.0485463	0.791896	0.979949	0.0641496	0.727235	0.946061	TC
100008994	1-stearoyl-2-linoleoyl-GPI (18:0/18:2)	Lipid	Phosphatidylinositol (PI)	-0.050515	0.783652	0.979949	-0.0656158	0.721244	0.946061	TC
338	gluconate	Xenobiotics	Food Component/Plant	0.0458395	0.803267	0.981311	0.0659824	0.719749	0.946061	TC
415	methionine	Amino Acid	Methionine, Cysteine, SAM and Taurine Metabolism	0.00838919	0.963654	0.991287	-0.0641496	0.727235	0.946061	TC
100001002	EDTA	Xenobiotics	Chemical	0.0220533	0.904639	0.991287	-0.063783	0.728735	0.946061	TC
100001950	bilirubin (E,E)*	Cofactors and Vitamins	Hemoglobin and Porphyrin Metabolism	0.0248722	0.892516	0.991287	0.0645161	0.725735	0.946061	TC
100002196	13-HODE + 9-HODE	Lipid	Fatty Acid, Monohydroxy	-0.228097	0.413563	0.892748	-0.0964286	0.732453	0.946925	TC
179	9,10-DiHOME	Lipid	Fatty Acid, Dihydroxy	-0.274589	0.51044	0.912991	-0.142857	0.735765	0.946925	TC
100001613	tetradecanedioate (C14-DC)	Lipid	Fatty Acid, Dicarboxylate	-0.182568	0.48309	0.912991	-0.0882353	0.736305	0.946925	TC
100000708	isovalerate (i5:0)	Amino Acid	Leucine, Isoleucine and Valine Metabolism	0.254802	0.542522	0.913917	0.142857	0.735765	0.946925	TC
1002	allantoin	Nucleotide	Purine Metabolism, (Hypo)Xanthine/Inosine containing	-0.0997644	0.586952	0.923257	-0.0623167	0.734745	0.946925	TC
100001211	sebacate (C10-DC)	Lipid	Fatty Acid, Dicarboxylate	0.100758	0.812354	0.984699	0.142857	0.735765	0.946925	TC
100001155	2-methylbutyrylglycine	Amino Acid	Leucine, Isoleucine and Valine Metabolism	0.0813652	0.848112	0.987672	0.142857	0.735765	0.946925	TC
100000656	1-stearoyl-GPI (18:0)	Lipid	Lysophospholipid	-0.00473859	0.979465	0.991287	0.0626833	0.733241	0.946925	TC
1123	chenodeoxycholate	Lipid	Primary Bile Acid Metabolism	-0.184599	0.399106	0.797214	-0.0592885	0.788147	0.948131	LDL
252	succinate	Energy	TCA Cycle	0.127921	0.485356	0.837212	-0.0482082	0.793314	0.948131	LDL
1518	N-palmitoyl-sphingosine (d18:1/16:0)	Lipid	Ceramides	-0.12156	0.507488	0.848649	0.0482082	0.793314	0.948131	LDL
1492	linoleamide (18:2n6)	Lipid	Fatty Acid, Amide	0.134651	0.511941	0.851672	-0.0536844	0.794507	0.948131	LDL
100001620	glycerophosphoethanolamine	Lipid	Phospholipid Metabolism	-0.103461	0.573099	0.865964	-0.0469251	0.798702	0.948131	LDL
100000447	gentisate	Amino Acid	Tyrosine Metabolism	-0.0984679	0.598194	0.87573	-0.0494001	0.791852	0.948131	LDL
100009132	1-linoleoyl-2-docosahexaenoyl-GPC (18:2/22:6)*	Lipid	Phosphatidylcholine (PC)	0.0987223	0.590884	0.87573	-0.0467418	0.799472	0.948131	LDL
1143	butyrate/isobutyrate (4:0)	Lipid	Short Chain Fatty Acid	0.169884	0.617506	0.887817	0.0909091	0.790373	0.948131	LDL
100000774	phenyllactate (PLA)	Amino Acid	Phenylalanine Metabolism	0.0829397	0.65178	0.898764	0.0476583	0.795622	0.948131	LDL
100019982	octadecadienedioate (C18:2-DC)*	Lipid	Fatty Acid, Dicarboxylate	-0.146517	0.667285	0.902115	-0.0911164	0.789904	0.948131	LDL
1162	N-acetylneuraminate	Carbohydrate	Aminosugar Metabolism	0.0649191	0.724089	0.926867	0.0469251	0.798702	0.948131	LDL
100022008	bilirubin degradation product, C17H20N2O5 (1)**	Partially Characterized Molecules	Partially Characterized Molecules	0.0620545	0.735821	0.926942	0.0467418	0.799472	0.948131	LDL
100002784	2-oxoarginine*	Amino Acid	Urea cycle; Arginine and Proline Metabolism	-0.0443811	0.80941	0.943744	-0.0478416	0.794853	0.948131	LDL
100009066	1-palmitoyl-2-oleoyl-GPI (16:0/18:1)*	Lipid	Phosphatidylinositol (PI)	0.0424819	0.817426	0.943962	0.0491247	0.789472	0.948131	LDL
100001994	androstenediol (3beta,17beta) disulfate (2)	Lipid	Androgenic Steroids	0.0411762	0.841702	0.943972	0.0553941	0.788106	0.948131	LDL
100006642	glycodeoxycholate 3-sulfate	Lipid	Secondary Bile Acid Metabolism	-0.0345066	0.929774	0.978959	-0.1	0.797972	0.948131	LDL
100001462	1-stearoyl-GPG (18:0)	Lipid	Lysophospholipid	-0.0771199	0.74657	0.974703	-0.0796992	0.738374	0.948473	TC
100022009	bilirubin degradation product, C17H20N2O5 (2)**	Partially Characterized Molecules	Partially Characterized Molecules	0.137364	0.461192	0.837212	0.0455691	0.807682	0.948853	LDL
182	quinolinate	Cofactors and Vitamins	Nicotinate and Nicotinamide Metabolism	-0.115366	0.529514	0.853531	-0.0458253	0.803327	0.948853	LDL
100004318	indolin-2-one	Xenobiotics	Food Component/Plant	-0.111403	0.55075	0.854715	0.046174	0.805177	0.948853	LDL
98	kynurenate	Amino Acid	Tryptophan Metabolism	0.0546649	0.766352	0.931348	0.0458253	0.803327	0.948853	LDL
100002462	5-(galactosylhydroxy)-lysine	Amino Acid	Lysine Metabolism	0.0214902	0.920606	0.976666	0.0521739	0.808688	0.948853	LDL
100009361	1-oleoyl-2-docosapentaenoyl-GPC (18:1/22:5n6)*	Lipid	Phosphatidylcholine (PC)	0.0204752	0.917633	0.976666	0.0484467	0.806602	0.948853	LDL
100000656	1-stearoyl-GPI (18:0)	Lipid	Lysophospholipid	-0.0137375	0.940515	0.982197	0.045642	0.804098	0.948853	LDL
100015592	1-stearoyl-2-docosapentaenoyl-GPE (18:0/22:5n3)*	Lipid	Phosphatidylethanolamine (PE)	0.0137135	0.940619	0.982197	0.0445422	0.808731	0.948853	LDL
100001654	1-arachidonoyl-GPI (20:4)*	Lipid	Lysophospholipid	0.00308062	0.986649	0.997357	0.0452754	0.805642	0.948853	LDL
100001993	pregnenediol disulfate (C21H34O8S2)*	Lipid	Pregnenolone Steroids	0.00292582	0.988926	0.997357	0.0527024	0.802437	0.948853	LDL
100002171	1-margaroyl-GPE (17:0)*	Lipid	Lysophospholipid	0.0866292	0.768399	0.931348	-0.0704071	0.810971	0.950465	LDL
1668	taurodeoxycholate	Lipid	Secondary Bile Acid Metabolism	0.0691619	0.742534	0.926942	0.05	0.812386	0.951107	LDL
100020373	2,2'-methylenebis(6-tert-butyl-p-cresol)	Xenobiotics	Chemical	0.100647	0.583632	0.872374	0.0432591	0.814143	0.951367	LDL
100002356	(16 or 17)-methylstearate (a19:0 or i19:0)	Lipid	Fatty Acid, Branched	-0.08367	0.718414	0.926805	-0.0545455	0.814343	0.951367	LDL
100008916	1-stearoyl-2-docosahexaenoyl-GPC (18:0/22:6)	Lipid	Phosphatidylcholine (PC)	0.0899964	0.624249	0.888916	-0.0423426	0.818015	0.952614	LDL
1102	gamma-glutamyltyrosine	Peptide	Gamma-glutamyl Amino Acid	0.0477916	0.798489	0.942905	-0.0431495	0.817718	0.952614	LDL
100000016	suberate (C8-DC)	Lipid	Fatty Acid, Dicarboxylate	0.038552	0.895897	0.969272	0.0681319	0.816984	0.952614	LDL
100015762	docosatrienoate (22:3n6)*	Lipid	Long Chain Polyunsaturated Fatty Acid (n3 and n6)	0.146404	0.537951	0.912991	0.0781955	0.743149	0.953196	TC
252	succinate	Energy	TCA Cycle	0.0754159	0.681639	0.957789	-0.0601173	0.743789	0.953196	TC
1026	phosphoethanolamine	Lipid	Phospholipid Metabolism	-0.140448	0.443263	0.897158	-0.0593842	0.746811	0.953727	TC
100010925	palmitoyl-arachidonoyl-glycerol (16:0/20:4) [2]*	Lipid	Diacylglycerol	0.0818435	0.763168	0.979096	-0.0882353	0.745222	0.953727	TC
197	S-adenosylhomocysteine (SAH)	Amino Acid	Methionine, Cysteine, SAM and Taurine Metabolism	-0.0377381	0.848796	0.987672	0.0640394	0.746129	0.953727	TC
100008991	1-palmitoyl-2-docosahexaenoyl-GPE (16:0/22:6)*	Lipid	Phosphatidylethanolamine (PE)	0.143831	0.432245	0.894537	0.0590176	0.748323	0.954547	TC
100001611	3beta,7alpha-dihydroxy-5-cholestenoate	Lipid	Sterol	0.0712806	0.835024	0.987672	-0.109091	0.749509	0.954949	TC
100001296	stachydrine	Xenobiotics	Food Component/Plant	-0.0478001	0.795027	0.942905	-0.0414261	0.82189	0.955099	LDL
100001266	N-acetylarginine	Amino Acid	Urea cycle; Arginine and Proline Metabolism	0.0418385	0.820146	0.943972	-0.0414261	0.82189	0.955099	LDL
100021760	N-acetyl-2-aminoadipate	Amino Acid	Lysine Metabolism	-0.134563	0.462785	0.911227	-0.0582845	0.751351	0.955448	TC
100020822	dihydrocaffeate sulfate (2)	Xenobiotics	Food Component/Plant	-0.101792	0.592483	0.923257	0.0602892	0.751643	0.955448	TC
1256	choline	Lipid	Phospholipid Metabolism	0.165834	0.364365	0.77735	0.040143	0.827323	0.956202	LDL
100001433	1-arachidonylglycerol (20:4)	Lipid	Monoacylglycerol	-0.170282	0.544021	0.854715	-0.0607143	0.829812	0.956202	LDL
100001540	glutamine_degradant*	Partially Characterized Molecules	Partially Characterized Molecules	-0.0591048	0.747963	0.927136	-0.0408762	0.824218	0.956202	LDL
100001310	nicotinamide riboside	Cofactors and Vitamins	Nicotinate and Nicotinamide Metabolism	-0.10566	0.771433	0.931348	0.0787879	0.828717	0.956202	LDL
100016038	(N(1) + N(8))-acetylspermidine	Amino Acid	Polyamine Metabolism	-0.0559908	0.760847	0.931348	-0.0399597	0.8281	0.956202	LDL
100004414	2-hydroxyphytanate*	Lipid	Fatty Acid, Branched	-0.0419644	0.832089	0.943972	0.0435199	0.825957	0.956202	LDL
100005389	ferulic acid 4-sulfate	Xenobiotics	Food Component/Plant	-0.0633886	0.822424	0.943972	0.0607143	0.829812	0.956202	LDL
391	citrulline	Amino Acid	Urea cycle; Arginine and Proline Metabolism	-0.00370743	0.983933	0.995733	0.0397764	0.828877	0.956202	LDL
1053	3-ureidopropionate	Nucleotide	Pyrimidine Metabolism, Uracil containing	0.070865	0.699934	0.92001	0.0392265	0.831209	0.956806	LDL
100015640	N-palmitoylserine	Lipid	Endocannabinoid	-0.300162	0.226199	0.663476	0.0423335	0.867539	0.957292	LDL
100009331	oleoylcholine	Lipid	Fatty Acid Metabolism (Acyl Choline)	0.211316	0.245645	0.67597	0.0386766	0.833542	0.957292	LDL
194	N-formylmethionine	Amino Acid	Methionine, Cysteine, SAM and Taurine Metabolism	-0.200721	0.270664	0.693767	-0.0337274	0.8546	0.957292	LDL
100006435	N-acetylglucosamine/N-acetylgalactosamine	Carbohydrate	Aminosugar Metabolism	-0.209421	0.266707	0.693767	-0.039159	0.837223	0.957292	LDL
827	cytidine	Nucleotide	Pyrimidine Metabolism, Cytidine containing	-0.229107	0.305079	0.728567	0.045185	0.841741	0.957292	LDL
100001415	N6-carbamoylthreonyladenosine	Nucleotide	Purine Metabolism, Adenine containing	0.163334	0.371743	0.784287	0.0381267	0.835876	0.957292	LDL
504	serotonin	Amino Acid	Tryptophan Metabolism	-0.153477	0.418098	0.804656	-0.0327066	0.863771	0.957292	LDL
100010917	palmitoyl-oleoyl-glycerol (16:0/18:1) [2]*	Lipid	Diacylglycerol	-0.200767	0.439731	0.825648	-0.0539216	0.837151	0.957292	LDL
1161	tigloylglycine	Amino Acid	Leucine, Isoleucine and Valine Metabolism	-0.185174	0.46196	0.837212	-0.041301	0.870744	0.957292	LDL
212	5-methylthioadenosine (MTA)	Amino Acid	Polyamine Metabolism	-0.11218	0.54102	0.854715	-0.0348272	0.849911	0.957292	LDL
561	glutamate	Amino Acid	Glutamate Metabolism	-0.111474	0.543584	0.854715	-0.0300614	0.870263	0.957292	LDL
100001208	1-methyl-4-imidazoleacetate	Amino Acid	Histidine Metabolism	0.112075	0.5414	0.854715	0.0317111	0.863209	0.957292	LDL
535	uridine	Nucleotide	Pyrimidine Metabolism, Uracil containing	-0.106504	0.561806	0.862994	-0.0302447	0.869479	0.957292	LDL
100009130	1-oleoyl-2-docosahexaenoyl-GPC (18:1/22:6)*	Lipid	Phosphatidylcholine (PC)	0.102639	0.576167	0.867016	-0.0335441	0.855382	0.957292	LDL
249	carnosine	Amino Acid	Histidine Metabolism	0.164707	0.590772	0.87573	0.0494505	0.872544	0.957292	LDL
100001145	3-hydroxysebacate	Lipid	Fatty Acid, Monohydroxy	-0.128163	0.612288	0.883287	-0.0505676	0.842056	0.957292	LDL
1105	alpha-tocopherol	Cofactors and Vitamins	Tocopherol Metabolism	-0.0869078	0.636241	0.894815	0.0298781	0.871048	0.957292	LDL
100009239	isocitric lactone	Energy	TCA Cycle	0.0974416	0.650576	0.898764	0.0417391	0.846452	0.957292	LDL
100020743	1-nonadecenoyl-GPC (19:1)*	Lipid	Lysophospholipid	-0.0967286	0.652976	0.898764	-0.0369646	0.863847	0.957292	LDL
100009181	1-stearoyl-2-oleoyl-GPI (18:0/18:1)*	Lipid	Phosphatidylinositol (PI)	0.0811025	0.659025	0.899365	0.0375768	0.838212	0.957292	LDL
100000616	1-stearoyl-2-arachidonoyl-GPI (18:0/20:4)	Lipid	Phosphatidylinositol (PI)	0.0762876	0.678154	0.910569	-0.0311612	0.865559	0.957292	LDL
818	malonate	Lipid	Fatty Acid Synthesis	-0.0691563	0.721493	0.926805	-0.0357187	0.854054	0.957292	LDL
100000924	1-oleoylglycerol (18:1)	Lipid	Monoacylglycerol	0.0911798	0.710462	0.926805	0.0438596	0.858499	0.957292	LDL
100006759	cyclo(met-pro)	Peptide	Dipeptide	-0.0754077	0.720159	0.926805	-0.0376923	0.858035	0.957292	LDL
100004111	4-methylcatechol sulfate	Xenobiotics	Benzoate Metabolism	0.0575098	0.754554	0.930052	0.0317111	0.863209	0.957292	LDL
297	sphingosine	Lipid	Sphingosines	0.0532387	0.772286	0.931348	0.0362936	0.843668	0.957292	LDL
376	isoleucine	Amino Acid	Leucine, Isoleucine and Valine Metabolism	0.053967	0.769254	0.931348	0.0309779	0.866343	0.957292	LDL
100001276	N-acetylisoleucine	Amino Acid	Leucine, Isoleucine and Valine Metabolism	-0.0710387	0.772586	0.931348	-0.0430013	0.861242	0.957292	LDL
100010919	oleoyl-oleoyl-glycerol (18:1/18:1) [2]*	Lipid	Diacylglycerol	-0.0528064	0.777845	0.934607	-0.0346774	0.853075	0.957292	LDL
100009179	1-palmitoyl-2-docosahexaenoyl-GPI (16:0/22:6)*	Lipid	Phosphatidylinositol (PI)	0.0512139	0.780732	0.937049	0.0300614	0.870263	0.957292	LDL
100003179	leucylalanine	Peptide	Dipeptide	-0.0496705	0.805656	0.942905	0.0326668	0.871501	0.957292	LDL
100001878	glycosyl-N-nervonoyl-sphingosine (d18:1/24:1)*	Lipid	Hexosylceramides (HCER)	-0.0432095	0.817469	0.943962	-0.0352858	0.850525	0.957292	LDL
100006105	4-methylguaiacol sulfate	Xenobiotics	Benzoate Metabolism	-0.0430393	0.831206	0.943972	-0.0396825	0.844206	0.957292	LDL
100009015	1-(1-enyl-stearoyl)-2-docosahexaenoyl-GPC (P-18:0/22:6)*	Lipid	Plasmalogen	0.0357584	0.845946	0.943972	0.0313445	0.864775	0.957292	LDL
100000580	1,5-anhydroglucitol (1,5-AG)	Carbohydrate	Glycolysis, Gluconeogenesis, and Pyruvate Metabolism	0.0302233	0.869571	0.953919	0.0313445	0.864775	0.957292	LDL
100001743	tryptophan betaine	Amino Acid	Tryptophan Metabolism	-0.0267986	0.884245	0.963274	-0.0315278	0.863992	0.957292	LDL
100009219	1-oleoyl-2-arachidonoyl-GPE (18:1/20:4)*	Lipid	Phosphatidylethanolamine (PE)	-0.0241284	0.895713	0.969272	-0.0339107	0.853818	0.957292	LDL
100009337	caffeic acid sulfate	Xenobiotics	Food Component/Plant	-0.0235088	0.909244	0.972324	0.0328261	0.873518	0.957292	LDL
100005418	17alpha-hydroxypregnanolone glucuronide	Lipid	Pregnenolone Steroids	-0.0231508	0.918549	0.976666	0.0457369	0.839832	0.957292	LDL
100005998	octadecanedioylcarnitine (C18-DC)*	Lipid	Fatty Acid Metabolism (Acyl Carnitine, Dicarboxylate)	0.0176853	0.923465	0.976896	-0.0366603	0.842108	0.957292	LDL
409	malate	Energy	TCA Cycle	0.0171693	0.925692	0.978308	-0.0348272	0.849911	0.957292	LDL
71	5-hydroxyindoleacetate	Amino Acid	Tryptophan Metabolism	-0.0191832	0.93077	0.978959	-0.041502	0.850863	0.957292	LDL
491	pyridoxal	Cofactors and Vitamins	Vitamin B6 Metabolism	0.0155585	0.932646	0.979993	0.0344606	0.851474	0.957292	LDL
100001226	I-urobilinogen	Cofactors and Vitamins	Hemoglobin and Porphyrin Metabolism	0.0516937	0.934211	0.980698	0.1	0.872889	0.957292	LDL
917	asparagine	Amino Acid	Alanine and Aspartate Metabolism	-0.0142574	0.938268	0.982197	0.0388599	0.832764	0.957292	LDL
480	proline	Amino Acid	Urea cycle; Arginine and Proline Metabolism	-0.00676117	0.970704	0.990255	-0.0329942	0.857729	0.957292	LDL
826	xylose	Carbohydrate	Pentose Metabolism	-0.00188917	0.994259	0.997357	0.0441176	0.866483	0.957292	LDL
100020360	8-methoxykynurenate	Amino Acid	Tryptophan Metabolism	0.00208607	0.990959	0.997357	0.0315278	0.863992	0.957292	LDL
1504	oleamide	Lipid	Fatty Acid, Amide	0.0865995	0.674013	0.906117	0.0321422	0.876133	0.957641	LDL
100005986	sphingomyelin (d18:1/24:1, d18:2/24:0)*	Lipid	Sphingomyelins	-0.0579684	0.752657	0.930052	0.0284117	0.877328	0.957641	LDL
100009131	1-linoleoyl-2-arachidonoyl-GPC (18:2/20:4n6)*	Lipid	Phosphatidylcholine (PC)	0.0555161	0.762816	0.931348	0.0287783	0.875757	0.957641	LDL
100002877	1-(1-enyl-stearoyl)-GPC (P-18:0)*	Lipid	Lysoplasmalogen	-0.0451031	0.834238	0.943972	-0.0334855	0.876561	0.957641	LDL
100009335	dihomo-linolenoyl-choline	Lipid	Fatty Acid Metabolism (Acyl Choline)	0.216451	0.242181	0.742815	0.0540323	0.772821	0.958283	TC
100001256	N-acetylphenylalanine	Amino Acid	Phenylalanine Metabolism	-0.137468	0.453093	0.907114	-0.0568182	0.757417	0.958283	TC
100001869	1-stearoyl-2-arachidonoyl-GPC (18:0/20:4)	Lipid	Phosphatidylcholine (PC)	0.134854	0.469499	0.911227	0.0568548	0.761287	0.958283	TC
100000016	suberate (C8-DC)	Lipid	Fatty Acid, Dicarboxylate	-0.191201	0.512601	0.912991	-0.0901099	0.759339	0.958283	TC
100000054	5-hydroxylysine	Amino Acid	Lysine Metabolism	-0.117743	0.521006	0.912991	-0.0516862	0.778759	0.958283	TC
100009145	1-palmitoyl-2-meadoyl-GPC (16:0/20:3n9)*	Lipid	Phosphatidylcholine (PC)	0.156412	0.562944	0.913946	0.0764706	0.778341	0.958283	TC
100021015	branched-chain fatty acid 18:0 (2)**	Lipid	Fatty Acid, Branched	-0.124693	0.561558	0.913946	-0.0617391	0.77443	0.958283	TC
100009259	glycocholate glucuronide (1)	Lipid	Primary Bile Acid Metabolism	-0.217207	0.605365	0.931396	-0.119048	0.778886	0.958283	TC
100021331	metabolonic lactone sulfate	Partially Characterized Molecules	Partially Characterized Molecules	-0.0944602	0.607084	0.932733	-0.0546188	0.766543	0.958283	TC
100000706	alpha-hydroxyisocaproate	Amino Acid	Leucine, Isoleucine and Valine Metabolism	0.087104	0.659404	0.953052	0.0563766	0.775688	0.958283	TC
100001054	butyrylcarnitine (C4)	Lipid	Fatty Acid Metabolism (also BCAA Metabolism)	0.0800869	0.663042	0.955585	0.0527859	0.774172	0.958283	TC
100000961	homoarginine	Amino Acid	Urea cycle; Arginine and Proline Metabolism	-0.0713648	0.697917	0.964121	-0.0527859	0.774172	0.958283	TC
100021728	cis-3,4-methyleneheptanoylcarnitine	Lipid	Fatty Acid Metabolism (Acyl Carnitine, Medium Chain)	0.0631326	0.731399	0.970035	0.0571848	0.755899	0.958283	TC
100001555	2-stearoyl-GPC (18:0)*	Lipid	Lysophospholipid	0.0597761	0.745195	0.974703	0.0538856	0.769592	0.958283	TC
100002028	androstenediol (3beta,17beta) monosulfate (1)	Lipid	Androgenic Steroids	0.0386296	0.833741	0.987672	0.0542522	0.768067	0.958283	TC
100009141	1-stearoyl-2-docosapentaenoyl-GPC (18:0/22:5n3)*	Lipid	Phosphatidylcholine (PC)	-0.0350504	0.84896	0.987672	-0.0516862	0.778759	0.958283	TC
432	nicotinamide	Cofactors and Vitamins	Nicotinate and Nicotinamide Metabolism	-0.0225875	0.90234	0.991287	-0.0531525	0.772645	0.958283	TC
100000437	theophylline	Xenobiotics	Xanthine Metabolism	0.0222991	0.906891	0.991287	0.0553949	0.771249	0.958283	TC
100000976	glycylproline	Peptide	Dipeptide	-0.0200788	0.93697	0.991287	0.0712074	0.778883	0.958283	TC
100001395	1-linoleoyl-GPC (18:2)	Lipid	Lysophospholipid	-0.0099917	0.956717	0.991287	0.0538856	0.769592	0.958283	TC
100001415	N6-carbamoylthreonyladenosine	Nucleotide	Purine Metabolism, Adenine containing	0.0156082	0.932432	0.991287	-0.056085	0.760456	0.958283	TC
100001445	1-palmitoyl-GPA (16:0)	Lipid	Lysophospholipid	0.0322518	0.895719	0.991287	0.0754386	0.758887	0.958283	TC
100001731	indoleacetylglutamine	Amino Acid	Tryptophan Metabolism	0.0197144	0.923847	0.991287	0.0577778	0.779205	0.958283	TC
100001878	glycosyl-N-nervonoyl-sphingosine (d18:1/24:1)*	Lipid	Hexosylceramides (HCER)	0.0249668	0.893942	0.991287	0.0552419	0.767872	0.958283	TC
100002989	oleoyl-linoleoyl-glycerol (18:1/18:2) [1]	Lipid	Diacylglycerol	0.0110304	0.952222	0.991287	0.0549853	0.76502	0.958283	TC
100005350	1-linolenoyl-GPC (18:3)*	Lipid	Lysophospholipid	-0.0189903	0.917835	0.991287	-0.0571848	0.755899	0.958283	TC
100005850	3-methylglutarylcarnitine (2)	Amino Acid	Leucine, Isoleucine and Valine Metabolism	-0.0176004	0.923831	0.991287	0.0524194	0.7757	0.958283	TC
100009328	furaneol sulfate	Xenobiotics	Food Component/Plant	0.043371	0.911784	0.991287	0.116667	0.765008	0.958283	TC
100021727	cis-3,4-methyleneheptanoate	Lipid	Fatty Acid, Branched	-0.0403259	0.895935	0.991287	-0.0934066	0.7615	0.958283	TC
71	5-hydroxyindoleacetate	Amino Acid	Tryptophan Metabolism	-0.0589576	0.789304	0.979949	-0.0612648	0.781249	0.958647	TC
100000863	adipate (C6-DC)	Lipid	Fatty Acid, Dicarboxylate	0.0338846	0.875101	0.991287	0.06	0.78063	0.958647	TC
100003627	aspartylaspartate	Peptide	Dipeptide	-0.0786616	0.668696	0.902288	-0.0276785	0.880471	0.959778	LDL
100002015	5alpha-pregnan-diol disulfate	Lipid	Progestin Steroids	0.0486697	0.893787	0.969272	-0.0545455	0.881036	0.959778	LDL
100002122	3-hydroxyhippurate	Xenobiotics	Benzoate Metabolism	-0.00825552	0.964233	0.991287	-0.0505865	0.783354	0.960155	TC
432	nicotinamide	Cofactors and Vitamins	Nicotinate and Nicotinamide Metabolism	0.0371652	0.839961	0.943972	0.0271286	0.882829	0.960777	LDL
100002874	1-nervonoyl-GPC (24:1n9)*	Lipid	Lysophospholipid	-0.00890783	0.968617	0.991287	0.0615471	0.785554	0.961778	TC
100000870	saccharin	Xenobiotics	Food Component/Plant	0.333072	0.207456	0.733206	0.0647059	0.811821	0.962185	TC
100020853	4-acetylcatechol sulfate (1)	Xenobiotics	Food Component/Plant	-0.390798	0.264159	0.760585	-0.0909091	0.802772	0.962185	TC
100000657	1,2-dipalmitoyl-GPC (16:0/16:0)	Lipid	Phosphatidylcholine (PC)	-0.173611	0.34198	0.844937	-0.045088	0.806431	0.962185	TC
100015923	N-oxalyl glycine (NOG)	Xenobiotics	Food Component/Plant	-0.222645	0.390383	0.887307	-0.0637255	0.808021	0.962185	TC
100008977	1-stearoyl-2-arachidonoyl-GPE (18:0/20:4)	Lipid	Phosphatidylethanolamine (PE)	0.136854	0.455133	0.907784	0.045088	0.806431	0.962185	TC
100002951	eicosanedioate (C20-DC)	Lipid	Fatty Acid, Dicarboxylate	-0.188735	0.46817	0.911227	-0.0637255	0.808021	0.962185	TC
331	gamma-glutamylglutamate	Peptide	Gamma-glutamyl Amino Acid	-0.125741	0.492886	0.912991	-0.0491202	0.789491	0.962185	TC
1140	gamma-glutamylglutamine	Peptide	Gamma-glutamyl Amino Acid	0.116751	0.524547	0.912991	0.0491202	0.789491	0.962185	TC
512	taurine	Amino Acid	Methionine, Cysteine, SAM and Taurine Metabolism	-0.106345	0.562393	0.913946	-0.0436217	0.812613	0.962185	TC
313	sphinganine	Lipid	Sphingolipid Synthesis	-0.105083	0.567065	0.916157	-0.0469208	0.79872	0.962185	TC
100020205	hydroxyasparagine**	Amino Acid	Alanine and Aspartate Metabolism	-0.092499	0.614601	0.934823	-0.0469208	0.79872	0.962185	TC
100020541	11beta-hydroxyandrosterone glucuronide	Lipid	Androgenic Steroids	0.0944668	0.613217	0.934823	0.0483871	0.79603	0.962185	TC
356	cortisol	Lipid	Corticosteroids	-0.0895108	0.626128	0.93674	0.0483871	0.792564	0.962185	TC
1256	choline	Lipid	Phospholipid Metabolism	0.0903501	0.622881	0.93674	-0.0432551	0.81416	0.962185	TC
100015684	myristoyl-linoleoyl-glycerol (14:0/18:2) [2]*	Lipid	Diacylglycerol	0.171845	0.634995	0.939959	0.0909091	0.802772	0.962185	TC
100005946	2-keto-3-deoxy-gluconate	Xenobiotics	Food Component/Plant	0.0783393	0.669977	0.955585	0.0432551	0.81416	0.962185	TC
799	betaine	Amino Acid	Glycine, Serine and Threonine Metabolism	0.0685639	0.70925	0.966771	0.0439883	0.811066	0.962185	TC
241	phenylpyruvate	Amino Acid	Phenylalanine Metabolism	-0.0811002	0.773865	0.979096	-0.075	0.790511	0.962185	TC
1442	beta-hydroxyisovalerate	Amino Acid	Leucine, Isoleucine and Valine Metabolism	-0.0688403	0.766848	0.979096	-0.0584416	0.801328	0.962185	TC
100000611	1-palmityl-GPC (O-16:0)	Lipid	Lysoplasmalogen	-0.0517071	0.778672	0.979096	0.0458211	0.803344	0.962185	TC
100001509	2-methylbutyrylcarnitine (C5)	Amino Acid	Leucine, Isoleucine and Valine Metabolism	-0.0801605	0.759736	0.979096	0.0612745	0.815283	0.962185	TC
2054	ethylmalonate	Amino Acid	Leucine, Isoleucine and Valine Metabolism	0.0487162	0.791184	0.979949	0.0432551	0.81416	0.962185	TC
100005371	1-dihomo-linolenoyl-GPE (20:3n3 or 6)*	Lipid	Lysophospholipid	-0.0462737	0.811604	0.984699	-0.0522167	0.787922	0.962185	TC
100009067	1-stearoyl-2-docosahexaenoyl-GPI (18:0/22:6)*	Lipid	Phosphatidylinositol (PI)	0.0430945	0.814838	0.98662	-0.0436217	0.812613	0.962185	TC
100009361	1-oleoyl-2-docosapentaenoyl-GPC (18:1/22:5n6)*	Lipid	Phosphatidylcholine (PC)	-0.0405109	0.837827	0.987672	0.0514505	0.794856	0.962185	TC
498	retinol (vitamin A)	Cofactors and Vitamins	Vitamin A Metabolism	-0.00821259	0.964418	0.991287	0.0447214	0.807975	0.962185	TC
1113	4-acetamidobutanoate	Amino Acid	Polyamine Metabolism	-0.0124532	0.946068	0.991287	0.0469208	0.79872	0.962185	TC
1628	glycochenodeoxycholate	Lipid	Primary Bile Acid Metabolism	0.0165242	0.930936	0.991287	0.047386	0.803628	0.962185	TC
100001263	1-palmitoyl-GPC (16:0)	Lipid	Lysophospholipid	0.0071795	0.968892	0.991287	-0.047654	0.79564	0.962185	TC
100001396	7-methylxanthine	Xenobiotics	Xanthine Metabolism	-0.0265865	0.887104	0.991287	0.0475806	0.79936	0.962185	TC
100001404	indolebutyrate	Amino Acid	Tryptophan Metabolism	-0.0323306	0.916495	0.991287	-0.0824176	0.788951	0.962185	TC
100001511	1-palmitoleoyl-GPC (16:1)*	Lipid	Lysophospholipid	0.00482103	0.979108	0.991287	-0.0469208	0.79872	0.962185	TC
100010936	oleoyl-arachidonoyl-glycerol (18:1/20:4) [1]*	Lipid	Diacylglycerol	0.0237632	0.897283	0.991287	-0.0428886	0.815708	0.962185	TC
100015968	carotene diol (3)	Cofactors and Vitamins	Vitamin A Metabolism	0.00785349	0.973048	0.991287	0.0584416	0.801328	0.962185	TC
100008921	1-palmitoyl-2-stearoyl-GPC (16:0/18:0)	Lipid	Phosphatidylcholine (PC)	0.0771475	0.674723	0.955585	0.042522	0.817257	0.962976	TC
100001612	N-acetyl-aspartyl-glutamate (NAAG)	Amino Acid	Glutamate Metabolism	-0.211794	0.261202	0.754049	-0.0433815	0.819941	0.963475	TC
100001229	stearidonate (18:4n3)	Lipid	Long Chain Polyunsaturated Fatty Acid (n3 and n6)	0.0554219	0.763207	0.979096	0.0417889	0.820356	0.963475	TC
100009407	pimeloylcarnitine/3-methyladipoylcarnitine (C7-DC)	Lipid	Fatty Acid Metabolism (Acyl Carnitine, Dicarboxylate)	-0.0470245	0.801659	0.981311	-0.0419355	0.822765	0.963475	TC
100001810	dimethylarginine (SDMA + ADMA)	Amino Acid	Urea cycle; Arginine and Proline Metabolism	-0.0122916	0.946766	0.991287	-0.0414223	0.821906	0.963475	TC
100005373	fructosyllysine	Amino Acid	Lysine Metabolism	-0.0321164	0.861477	0.991287	0.0417889	0.820356	0.963475	TC
100021374	branched chain 14:0 dicarboxylic acid**	Lipid	Fatty Acid, Dicarboxylate	0.00434326	0.982847	0.991888	0.045177	0.82295	0.963475	TC
100002871	1-adrenoyl-GPC (22:4)*	Lipid	Lysophospholipid	0.0746358	0.684762	0.957789	-0.0406891	0.82501	0.964857	TC
100021728	cis-3,4-methyleneheptanoylcarnitine	Lipid	Fatty Acid Metabolism (Acyl Carnitine, Medium Chain)	0.0484912	0.792127	0.942905	0.0260288	0.887549	0.964956	LDL
100001566	1-docosahexaenoyl-GPC (22:6)*	Lipid	Lysophospholipid	0.126277	0.491027	0.912991	0.0403226	0.826562	0.965643	TC
100004326	3-acetylphenol sulfate	Xenobiotics	Chemical	0.0983736	0.727244	0.926942	0.0392857	0.889446	0.966062	LDL
100009215	1-stearoyl-2-dihomo-linolenoyl-GPE (18:0/20:3n3 or 6)*	Lipid	Phosphatidylethanolamine (PE)	0.116826	0.52428	0.852005	0.024929	0.892272	0.967114	LDL
892	nonadecanoate (19:0)	Lipid	Long Chain Saturated Fatty Acid	-0.0828453	0.687428	0.915181	0.0273551	0.894471	0.967114	LDL
313	sphinganine	Lipid	Sphingolipid Synthesis	-0.0519493	0.777661	0.934607	-0.0245624	0.893847	0.967114	LDL
1124	citrate	Energy	TCA Cycle	0.0441468	0.810398	0.943744	-0.0247457	0.89306	0.967114	LDL
100000707	maleate	Lipid	Fatty Acid, Dicarboxylate	0.0102278	0.963969	0.988294	-0.0299266	0.894823	0.967114	LDL
100009336	eicosapentaenoylcholine	Lipid	Fatty Acid Metabolism (Acyl Choline)	0.163319	0.388502	0.79661	0.0246969	0.896929	0.967281	LDL
100015609	N-palmitoyl-sphingadienine (d18:2/16:0)*	Lipid	Ceramides	0.159926	0.398566	0.797214	0.0249193	0.896005	0.967281	LDL
100008977	1-stearoyl-2-arachidonoyl-GPE (18:0/20:4)	Lipid	Phosphatidylethanolamine (PE)	0.15107	0.409182	0.801188	0.0216295	0.906463	0.967281	LDL
100004208	guaiacol sulfate	Xenobiotics	Benzoate Metabolism	-0.144858	0.428931	0.812672	0.0210796	0.908831	0.967281	LDL
267	choline phosphate	Lipid	Phospholipid Metabolism	-0.120918	0.509751	0.851137	0.0214462	0.907253	0.967281	LDL
100001211	sebacate (C10-DC)	Lipid	Fatty Acid, Dicarboxylate	-0.206126	0.624322	0.888916	0.047619	0.910849	0.967281	LDL
100020833	2-ketocaprylate	Amino Acid	Leucine, Isoleucine and Valine Metabolism	-0.170516	0.686426	0.915181	0.047619	0.910849	0.967281	LDL
100015723	hexadecasphingosine (d16:1)*	Lipid	Sphingosines	0.0544154	0.767389	0.931348	0.0212629	0.908042	0.967281	LDL
100000708	isovalerate (i5:0)	Amino Acid	Leucine, Isoleucine and Valine Metabolism	0.0990726	0.815451	0.943942	0.047619	0.910849	0.967281	LDL
512	taurine	Amino Acid	Methionine, Cysteine, SAM and Taurine Metabolism	0.0397505	0.828987	0.943972	0.023096	0.900152	0.967281	LDL
100002070	2-hydroxyglutarate	Lipid	Fatty Acid, Dicarboxylate	-0.0421442	0.818853	0.943972	-0.0229127	0.900941	0.967281	LDL
100002876	1-(1-enyl-oleoyl)-GPC (P-18:1)*	Lipid	Lysoplasmalogen	0.0182539	0.922357	0.976666	-0.0217764	0.907433	0.967281	LDL
100000008	benzoate	Xenobiotics	Benzoate Metabolism	-0.0289865	0.945681	0.984262	-0.047619	0.910849	0.967281	LDL
100001129	O-acetylhomoserine	Amino Acid	Glycine, Serine and Threonine Metabolism	0.0151197	0.952518	0.984843	0.0319917	0.899719	0.967281	LDL
1141	4-hydroxyphenylpyruvate	Amino Acid	Tyrosine Metabolism	-0.00704569	0.969472	0.990255	0.0218128	0.905674	0.967281	LDL
100001395	1-linoleoyl-GPC (18:2)	Lipid	Lysophospholipid	-0.00212619	0.990785	0.997357	0.023096	0.900152	0.967281	LDL
100006103	3-hydroxyindolin-2-one sulfate	Xenobiotics	Food Component/Plant	0.00166404	0.99512	0.997357	0.0323529	0.90532	0.967281	LDL
100021666	branched-chain, straight-chain, or cyclopropyl 10:1 fatty acid (1)*	Partially Characterized Molecules	Partially Characterized Molecules	-0.00295314	0.992733	0.997357	0.038529	0.90537	0.967281	LDL
100020205	hydroxyasparagine**	Amino Acid	Alanine and Aspartate Metabolism	-0.0652952	0.722553	0.926805	-0.0197965	0.91436	0.969034	LDL
100001108	3-methylxanthine	Xenobiotics	Xanthine Metabolism	0.0645115	0.793027	0.942905	0.0263273	0.914801	0.969034	LDL
100015839	dihomo-linoleoylcarnitine (C20:2)*	Lipid	Fatty Acid Metabolism (Acyl Carnitine, Polyunsaturated)	-0.000665108	0.997117	0.998027	-0.0196132	0.91515	0.969034	LDL
100009148	1-oleoyl-2-dihomo-linolenoyl-GPC (18:1/20:3)*	Lipid	Phosphatidylcholine (PC)	-0.103216	0.714324	0.926805	-0.0285714	0.91949	0.970819	LDL
100015594	1-stearoyl-2-adrenoyl-GPE (18:0/22:4)*	Lipid	Phosphatidylethanolamine (PE)	-0.0638713	0.732836	0.926942	-0.0189535	0.919391	0.970819	LDL
100021709	branched-chain, straight-chain, or cyclopropyl 12:1 fatty acid*	Partially Characterized Molecules	Partially Characterized Molecules	0.0410991	0.823274	0.943972	-0.0186967	0.919102	0.970819	LDL
397	leucine	Amino Acid	Leucine, Isoleucine and Valine Metabolism	0.0862877	0.638659	0.940415	0.0388563	0.832779	0.970838	TC
100015839	dihomo-linoleoylcarnitine (C20:2)*	Lipid	Fatty Acid Metabolism (Acyl Carnitine, Polyunsaturated)	0.0513738	0.780064	0.979096	0.0388563	0.832779	0.970838	TC
100000039	methionine sulfoxide	Amino Acid	Methionine, Cysteine, SAM and Taurine Metabolism	0.0961154	0.60077	0.87573	0.0177802	0.923055	0.97271	LDL
100001132	pyroglutamylvaline	Peptide	Modified Peptides	-0.0239075	0.929968	0.978959	-0.0264706	0.922481	0.97271	LDL
136	cholate	Lipid	Primary Bile Acid Metabolism	0.0241806	0.924126	0.991287	0.0526316	0.83569	0.973198	TC
503	serine	Amino Acid	Glycine, Serine and Threonine Metabolism	-0.0848995	0.644087	0.898456	-0.0168637	0.927011	0.97397	LDL
100020478	dodecadienoate (12:2)*	Lipid	Fatty Acid, Dicarboxylate	0.062926	0.732245	0.926942	0.0166804	0.927802	0.97397	LDL
100001615	octadecanedioate (C18-DC)	Lipid	Fatty Acid, Dicarboxylate	0.0444132	0.815731	0.943942	-0.017577	0.926547	0.97397	LDL
100021198	picolinoylglycine	Lipid	Fatty Acid Metabolism (Acyl Glycine)	-0.00514045	0.977724	0.993189	0.0168637	0.927011	0.97397	LDL
132	3-phosphoglycerate	Carbohydrate	Glycolysis, Gluconeogenesis, and Pyruvate Metabolism	0.094244	0.607911	0.878627	0.0161305	0.930176	0.975529	LDL
100005367	N-acetylalliin	Xenobiotics	Food Component/Plant	-0.249147	0.517968	0.852005	0.0333333	0.932157	0.976672	LDL
100004396	3-hydroxyadipate	Lipid	Fatty Acid, Dicarboxylate	0.0366229	0.868238	0.991287	0.0444664	0.840339	0.976799	TC
100020478	dodecadienoate (12:2)*	Lipid	Fatty Acid, Dicarboxylate	0.0289304	0.875106	0.991287	-0.0370235	0.840564	0.976799	TC
100009219	1-oleoyl-2-arachidonoyl-GPE (18:1/20:4)*	Lipid	Phosphatidylethanolamine (PE)	-0.0118181	0.948815	0.991287	-0.0366569	0.842122	0.977575	TC
100009220	1-oleoyl-2-docosahexaenoyl-GPE (18:1/22:6)*	Lipid	Phosphatidylethanolamine (PE)	0.10529	0.593875	0.923257	0.0383142	0.846515	0.978532	TC
100009205	1-palmitoyl-2-stearoyl-GPE (16:0/18:0)*	Lipid	Phosphatidylethanolamine (PE)	0.0142086	0.956837	0.991287	-0.0514706	0.844467	0.978532	TC
100020360	8-methoxykynurenate	Amino Acid	Tryptophan Metabolism	0.00819742	0.964484	0.991287	0.0359238	0.845242	0.978532	TC
100002152	andro steroid monosulfate C19H28O6S (1)*	Lipid	Androgenic Steroids	-0.00226958	0.990855	0.996304	0.0383142	0.846515	0.978532	TC
563	glutamine	Amino Acid	Glutamate Metabolism	0.0498068	0.786616	0.94205	-0.0148474	0.935718	0.978535	LDL
100009147	1-stearyl-GPC (O-18:0)*	Lipid	Lysoplasmalogen	-0.0531456	0.788247	0.942905	-0.0161489	0.934996	0.978535	LDL
[truncated: 196 more rows]

## Sheet: Supplementary TableS6-2
				Pearson correlation			Spearman correlation			Response
CHEM_ID	Chemical name	Super pathway	Sub-pathway	r	P-value	q-value	r	P-value	q-value
100002007	5alpha-androstan-3alpha,17alpha-diol disulfate	Lipid	Androgenic Steroids	0.96681	0.00722229	0.944813	1	1.40427e-24	1.33124e-21	LDL
100021374	branched chain 14:0 dicarboxylic acid**	Lipid	Fatty Acid, Dicarboxylate	0.605747	0.000635553	0.602504	0.668126	0.000102204	0.0484447	LDL
100000806	isocaproate (i6:0)	Lipid	Fatty Acid, Branched	0.600251	0.0019287	0.769949	0.65913	0.000460063	0.153681	TC
932	caprylate (8:0)	Lipid	Medium Chain Fatty Acid	0.476076	0.010441	0.769949	0.615764	0.000486333	0.153681	TC
252	succinate	Energy	TCA Cycle	0.365142	0.0610948	0.844552	0.636752	0.000355479	0.153681	TC
100021374	branched chain 14:0 dicarboxylic acid**	Lipid	Fatty Acid, Dicarboxylate	0.471382	0.0113373	0.769949	0.590038	0.000950287	0.225218	TC
100001446	5-methyluridine (ribothymidine)	Nucleotide	Pyrimidine Metabolism, Uracil containing	0.571092	0.00150349	0.769949	0.568692	0.00159037	0.301534	TC
100000806	isocaproate (i6:0)	Lipid	Fatty Acid, Branched	0.551301	0.00523275	0.944813	0.628397	0.00100759	0.318398	LDL
914	ribose	Carbohydrate	Pentose Metabolism	0.523856	0.0102989	0.769949	0.598814	0.0025362	0.399613	TC
100002769	argininate*	Amino Acid	Urea cycle; Arginine and Proline Metabolism	0.478461	0.0134154	0.769949	0.559658	0.00295073	0.399613	TC
100001108	3-methylxanthine	Xenobiotics	Xanthine Metabolism	0.622563	0.0100042	0.944813	0.694629	0.00282481	0.469057	LDL
252	succinate	Energy	TCA Cycle	0.313794	0.110953	0.944813	0.546481	0.00318544	0.469057	LDL
932	caprylate (8:0)	Lipid	Medium Chain Fatty Acid	0.405659	0.0322148	0.944813	0.527166	0.00394552	0.469057	LDL
100001296	stachydrine	Xenobiotics	Food Component/Plant	0.39253	0.0388159	0.944813	0.520049	0.00455899	0.469057	LDL
100001415	N6-carbamoylthreonyladenosine	Nucleotide	Purine Metabolism, Adenine containing	0.613291	0.00884193	0.944813	0.64951	0.00477609	0.469057	LDL
100006726	linoleoyl ethanolamide	Lipid	Endocannabinoid	-0.563267	0.00513208	0.944813	-0.566345	0.00484291	0.469057	LDL
100022005	bilirubin degradation product, C17H18N2O4 (1)**	Partially Characterized Molecules	Partially Characterized Molecules	0.567961	0.0683426	0.944813	0.772727	0.00529949	0.469057	LDL
100001083	indolepropionate	Amino Acid	Tryptophan Metabolism	0.42154	0.0254722	0.944813	0.506911	0.00590612	0.469057	LDL
100015655	LAHSA (18:2/OH-18:0)*	Lipid	Fatty Acid Hydroxyl Fatty Acid	-0.339337	0.0772981	0.944813	-0.506637	0.00593743	0.469057	LDL
100003869	taurohyodeoxycholic acid	Lipid	Secondary Bile Acid Metabolism	-0.882752	0.0198149	0.769949	-0.942857	0.00480466	0.499	TC
100000135	2'-deoxyinosine	Nucleotide	Purine Metabolism, (Hypo)Xanthine/Inosine containing	0.501366	0.00656839	0.769949	0.511221	0.00543131	0.499	TC
872	thymidine	Nucleotide	Pyrimidine Metabolism, Thymine containing	0.502157	0.00647028	0.769949	0.507937	0.00579008	0.499	TC
100021503	N-carbamoylputrescine	Amino Acid	Polyamine Metabolism	0.48365	0.00912032	0.769949	0.507937	0.00579008	0.499	TC
914	ribose	Carbohydrate	Pentose Metabolism	0.386326	0.0686266	0.944813	0.543118	0.00740304	0.539852	LDL
100021503	N-carbamoylputrescine	Amino Acid	Polyamine Metabolism	0.454671	0.0150654	0.944813	0.487478	0.00850804	0.576116	LDL
179	9,10-DiHOME	Lipid	Fatty Acid, Dihydroxy	-0.604286	0.00225899	0.944813	-0.527304	0.00972126	0.586035	LDL
100021104	pregnenetriol disulfate*	Lipid	Pregnenolone Steroids	0.706626	0.0500508	0.944813	0.833333	0.0101755	0.586035	LDL
100001104	N-acetyltyrosine	Amino Acid	Tyrosine Metabolism	0.353681	0.0648383	0.944813	0.475708	0.0105091	0.586035	LDL
100002769	argininate*	Amino Acid	Urea cycle; Arginine and Proline Metabolism	0.410517	0.0372403	0.944813	0.487605	0.0115117	0.606284	LDL
100015744	ceramide (d18:2/24:1, d18:1/24:2)*	Lipid	Ceramides	-0.730021	0.0165274	0.769949	-0.769697	0.00922195	0.613748	TC
100015967	carotene diol (2)	Cofactors and Vitamins	Vitamin A Metabolism	0.451508	0.0180755	0.769949	0.480464	0.0111921	0.613748	TC
100001423	4-hydroxyhippurate	Xenobiotics	Benzoate Metabolism	-0.419695	0.0367442	0.769949	-0.496154	0.0116519	0.613748	TC
100015737	ceramide (d18:1/17:0, d17:1/18:0)*	Lipid	Ceramides	-0.70143	0.035231	0.769949	-0.783333	0.0125199	0.613748	TC
100001108	3-methylxanthine	Xenobiotics	Xanthine Metabolism	0.56145	0.023632	0.769949	0.602941	0.0134241	0.613748	TC
491	pyridoxal	Cofactors and Vitamins	Vitamin B6 Metabolism	0.418141	0.0268088	0.769949	0.460317	0.0137062	0.613748	TC
100020219	3-formylindole	Xenobiotics	Food Component/Plant	0.448649	0.016636	0.769949	0.45977	0.0138333	0.613748	TC
100005864	methyl glucopyranoside (alpha + beta)	Xenobiotics	Food Component/Plant	0.478837	0.0280882	0.769949	0.522078	0.0151958	0.613748	TC
100010846	propionylglutamine	Amino Acid	Glutamate Metabolism	0.420601	0.0512783	0.769949	0.504235	0.0167142	0.613748	TC
179	9,10-DiHOME	Lipid	Fatty Acid, Dihydroxy	-0.549056	0.00666072	0.769949	-0.491107	0.0173283	0.613748	TC
100001415	N6-carbamoylthreonyladenosine	Nucleotide	Purine Metabolism, Adenine containing	0.510553	0.0362472	0.769949	0.566176	0.0178228	0.613748	TC
361	inosine	Nucleotide	Purine Metabolism, (Hypo)Xanthine/Inosine containing	0.404521	0.0327487	0.769949	0.44335	0.0181276	0.613748	TC
100001296	stachydrine	Xenobiotics	Food Component/Plant	0.365545	0.0557619	0.800944	0.443897	0.0179686	0.613748	TC
100021478	1-methyl-5-imidazolelactate	Amino Acid	Histidine Metabolism	0.329192	0.0936017	0.948354	0.486569	0.0100639	0.613748	TC
100015655	LAHSA (18:2/OH-18:0)*	Lipid	Fatty Acid Hydroxyl Fatty Acid	-0.313335	0.10446	0.948354	-0.46798	0.012026	0.613748	TC
100000409	2-isopropylmalate	Xenobiotics	Food Component/Plant	0.301014	0.119577	0.948354	0.446086	0.017344	0.613748	TC
100001083	indolepropionate	Amino Acid	Tryptophan Metabolism	0.312128	0.105875	0.948354	0.443897	0.0179686	0.613748	TC
536	2'-deoxyuridine	Nucleotide	Pyrimidine Metabolism, Uracil containing	0.447261	0.0170164	0.769949	0.437329	0.0199543	0.615001	TC
926	caproate (6:0)	Lipid	Medium Chain Fatty Acid	0.472435	0.0111308	0.769949	0.43514	0.0206549	0.615001	TC
882	thymine	Nucleotide	Pyrimidine Metabolism, Thymine containing	0.465543	0.0125407	0.769949	0.434592	0.0208331	0.615001	TC
100005384	O-sulfo-tyrosine	Xenobiotics	Chemical	-0.557347	0.0248978	0.769949	-0.567647	0.0218146	0.615001	TC
1053	3-ureidopropionate	Nucleotide	Pyrimidine Metabolism, Uracil containing	0.412872	0.050229	0.769949	0.474308	0.0222171	0.615001	TC
114	3-hydroxyphenylacetate	Amino Acid	Phenylalanine Metabolism	0.380603	0.0501695	0.769949	0.434066	0.0236844	0.615001	TC
100000765	levulinate (4-oxovalerate)	Xenobiotics	Food Component/Plant	0.609535	0.035365	0.769949	0.643357	0.0240032	0.615001	TC
100001550	homostachydrine*	Xenobiotics	Food Component/Plant	0.361831	0.127951	0.948354	0.524561	0.0211231	0.615001	TC
100022005	bilirubin degradation product, C17H18N2O4 (1)**	Partially Characterized Molecules	Partially Characterized Molecules	0.4858	0.129788	0.948354	0.672727	0.023313	0.615001	TC
100015966	carotene diol (1)	Cofactors and Vitamins	Vitamin A Metabolism	0.358161	0.0612854	0.844552	0.419814	0.026144	0.635501	TC
100020407	enterolactone sulfate	Xenobiotics	Food Component/Plant	0.404341	0.0690639	0.884765	0.485714	0.0256003	0.635501	TC
100020838	5-methylhexanoate (i7:0)	Lipid	Fatty Acid, Branched	0.620133	0.041809	0.769949	0.654545	0.0288646	0.651287	TC
827	cytidine	Nucleotide	Pyrimidine Metabolism, Cytidine containing	0.37015	0.05252	0.769949	0.412151	0.0293031	0.651287	TC
1143	butyrate/isobutyrate (4:0)	Lipid	Short Chain Fatty Acid	0.369761	0.0527875	0.769949	0.412151	0.0293031	0.651287	TC
100001767	pyrraline	Xenobiotics	Food Component/Plant	0.406421	0.0393677	0.769949	0.424274	0.0307562	0.651287	TC
100000098	5-(2-hydroxyethyl)-4-methylthiazole	Cofactors and Vitamins	Thiamine Metabolism	0.463329	0.0259726	0.769949	0.449605	0.0313634	0.651287	TC
100006726	linoleoyl ethanolamide	Lipid	Endocannabinoid	-0.410399	0.0517605	0.769949	-0.449605	0.0313634	0.651287	TC
100010893	1-palmitoyl-2-linoleoyl-galactosylglycerol (16:0/18:2)*	Lipid	Galactosyl Glycerolipids	0.538597	0.0383161	0.769949	0.553571	0.0322871	0.651287	TC
348	2'-deoxyguanosine	Nucleotide	Purine Metabolism, Guanine containing	0.399782	0.0350482	0.769949	0.403394	0.0332844	0.651287	TC
100021519	2-methyl-proline	Amino Acid	Urea cycle; Arginine and Proline Metabolism	0.524204	0.0448663	0.769949	0.55	0.0336554	0.651287	TC
100002619	sedoheptulose	Carbohydrate	Pentose Metabolism	0.497456	0.0114005	0.769949	0.420769	0.0362157	0.651287	TC
100021712	deoxycholic acid 12-sulfate*	Lipid	Secondary Bile Acid Metabolism	0.791238	0.0340565	0.769949	0.785714	0.0362385	0.651287	TC
918	fucose	Carbohydrate	Aminosugar Metabolism	0.408732	0.0308087	0.769949	0.396825	0.036547	0.651287	TC
100000934	digalacturonic acid	Xenobiotics	Food Component/Plant	0.699383	0.0113604	0.769949	0.601399	0.0385885	0.651287	TC
825	uracil	Nucleotide	Pyrimidine Metabolism, Uracil containing	0.37659	0.0482364	0.769949	0.391352	0.0394574	0.651287	TC
100001313	gamma-glutamylmethionine	Peptide	Gamma-glutamyl Amino Acid	0.445128	0.0199846	0.769949	0.391331	0.0435382	0.651287	TC
100004523	N-delta-acetylornithine	Amino Acid	Urea cycle; Arginine and Proline Metabolism	0.393292	0.0384053	0.769949	0.373837	0.0500324	0.651287	TC
100001567	1-palmitoyl-GPE (16:0)	Lipid	Lysophospholipid	0.371233	0.0517793	0.769949	0.371648	0.051498	0.651287	TC
925	heptanoate (7:0)	Lipid	Medium Chain Fatty Acid	0.400162	0.034859	0.769949	0.370005	0.0526192	0.651287	TC
100021647	isoursodeoxycholate sulfate (1)	Lipid	Secondary Bile Acid Metabolism	0.781342	0.0220372	0.769949	0.690476	0.0579903	0.651287	TC
100000989	triethanolamine	Xenobiotics	Chemical	0.354188	0.0644289	0.861142	0.367269	0.0545303	0.651287	TC
100002284	2S,3R-dihydroxybutyrate	Lipid	Fatty Acid, Dihydroxy	0.395043	0.0688216	0.884765	0.427442	0.0472279	0.651287	TC
100000870	saccharin	Xenobiotics	Food Component/Plant	-0.493916	0.0726432	0.893103	-0.542857	0.044864	0.651287	TC
100001267	piperine	Xenobiotics	Food Component/Plant	0.274892	0.183557	0.948354	0.423846	0.034735	0.651287	TC
100001104	N-acetyltyrosine	Amino Acid	Tyrosine Metabolism	0.263037	0.17626	0.948354	0.39792	0.0359861	0.651287	TC
100005999	7-hydroxycholesterol (alpha or beta)	Lipid	Sterol	0.477262	0.116649	0.948354	0.594406	0.0415215	0.651287	TC
100022610	ceramide (d18:2/16:0, d18:1/16:1, d16:1/18:1)*	Lipid	Ceramides	-0.350276	0.11001	0.948354	-0.435347	0.0428613	0.651287	TC
1105	alpha-tocopherol	Cofactors and Vitamins	Tocopherol Metabolism	0.288951	0.135883	0.948354	0.384784	0.043191	0.651287	TC
100010940	diacylglycerol (16:1/18:2 [2], 16:0/18:3 [1])*	Lipid	Diacylglycerol	0.313352	0.111483	0.948354	0.387057	0.0460912	0.651287	TC
100004542	2-aminoheptanoate	Lipid	Fatty Acid, Amino	-0.474272	0.101541	0.948354	-0.56044	0.0463459	0.651287	TC
100009062	(3'-5')-adenylylcytidine	Nucleotide	Dinucleotide	0.61384	0.105486	0.948354	0.714286	0.0465282	0.651287	TC
100001721	N2-acetyllysine	Amino Acid	Lysine Metabolism	0.293387	0.12971	0.948354	0.378763	0.0468552	0.651287	TC
100002026	androstenediol (3alpha, 17alpha) monosulfate (2)	Lipid	Androgenic Steroids	0.385869	0.0928892	0.948354	0.44812	0.0475317	0.651287	TC
100004290	o-tyrosine	Amino Acid	Tyrosine Metabolism	-0.61027	0.14558	0.948354	-0.75	0.0521814	0.651287	TC
100001022	threonate	Cofactors and Vitamins	Ascorbate and Aldarate Metabolism	0.330873	0.0854662	0.948354	0.368911	0.0533772	0.651287	TC
409	malate	Energy	TCA Cycle	0.268901	0.166464	0.948354	0.363985	0.0568952	0.651287	TC
100001946	cyclo(gly-pro)	Peptide	Dipeptide	0.356795	0.094676	0.948354	0.401186	0.0577868	0.651287	TC
535	uridine	Nucleotide	Pyrimidine Metabolism, Uracil containing	0.321145	0.0956461	0.948354	0.362343	0.0581073	0.651287	TC
100004272	biocytin	Cofactors and Vitamins	Biotin Metabolism	-0.345171	0.13609	0.948354	-0.430075	0.058396	0.651287	TC
100006115	arabonate/xylonate	Carbohydrate	Pentose Metabolism	0.228911	0.24132	0.976869	0.391352	0.0394574	0.651287	TC
100009038	myristoyl dihydrosphingomyelin (d18:0/14:0)*	Lipid	Dihydrosphingomyelins	-0.4365	0.20723	0.976869	-0.648485	0.0425401	0.651287	TC
100020372	3-indoleglyoxylic acid	Xenobiotics	Food Component/Plant	0.227476	0.244364	0.976869	0.374384	0.0496712	0.651287	TC
100003432	dihydroferulate	Xenobiotics	Food Component/Plant	0.206475	0.291808	0.976869	0.37329	0.0503957	0.651287	TC
100020004	3-carboxy-4-methyl-5-pentyl-2-furanpropionate (3-CMPFP)**	Lipid	Fatty Acid, Dicarboxylate	0.234649	0.229399	0.976869	0.371648	0.051498	0.651287	TC
100004250	4-hydroxycyclohexylcarboxylic acid	Xenobiotics	Food Component/Plant	0.303571	0.253032	0.976869	0.494118	0.0517234	0.651287	TC
100001634	vanillate	Xenobiotics	Food Component/Plant	0.302626	0.207906	0.976869	0.449123	0.0537317	0.651287	TC
100000283	N-acetylmuramate	Carbohydrate	Aminosugar Metabolism	0.204108	0.297496	0.976869	0.363985	0.0568952	0.651287	TC
100021647	isoursodeoxycholate sulfate (1)	Lipid	Secondary Bile Acid Metabolism	0.837727	0.00942475	0.944813	0.809524	0.0149027	0.65136	LDL
1053	3-ureidopropionate	Nucleotide	Pyrimidine Metabolism, Uracil containing	0.404896	0.055298	0.944813	0.497036	0.0158276	0.65136	LDL
100021478	1-methyl-5-imidazolelactate	Amino Acid	Histidine Metabolism	0.332232	0.0904326	0.944813	0.45764	0.0163843	0.65136	LDL
100020004	3-carboxy-4-methyl-5-pentyl-2-furanpropionate (3-CMPFP)**	Lipid	Fatty Acid, Dicarboxylate	0.300398	0.120374	0.944813	0.446695	0.0171737	0.65136	LDL
100001550	homostachydrine*	Xenobiotics	Food Component/Plant	0.466389	0.0441308	0.944813	0.537078	0.0177309	0.65136	LDL
100001446	5-methyluridine (ribothymidine)	Nucleotide	Pyrimidine Metabolism, Uracil containing	0.431172	0.0219758	0.944813	0.444232	0.017872	0.65136	LDL
872	thymidine	Nucleotide	Pyrimidine Metabolism, Thymine containing	0.384374	0.0434331	0.944813	0.443137	0.0181898	0.65136	LDL
100001988	5alpha-pregnan-3beta,20alpha-diol disulfate	Lipid	Progestin Steroids	0.893974	0.0162664	0.944813	0.885714	0.0188455	0.65136	LDL
100004542	2-aminoheptanoate	Lipid	Fatty Acid, Amino	-0.570839	0.0416001	0.944813	-0.63824	0.0189017	0.65136	LDL
100019981	heptenedioate (C7:1-DC)*	Lipid	Fatty Acid, Dicarboxylate	-0.422015	0.0356103	0.944813	-0.462781	0.0198335	0.65136	LDL
100005864	methyl glucopyranoside (alpha + beta)	Xenobiotics	Food Component/Plant	0.359077	0.109913	0.944813	0.502111	0.0203707	0.65136	LDL
114	3-hydroxyphenylacetate	Amino Acid	Phenylalanine Metabolism	0.428446	0.0257672	0.944813	0.441765	0.0210556	0.65136	LDL
1105	alpha-tocopherol	Cofactors and Vitamins	Tocopherol Metabolism	0.33119	0.0851495	0.944813	0.431093	0.0220027	0.65136	LDL
1137	oleoyl ethanolamide	Lipid	Endocannabinoid	-0.455967	0.0192269	0.944813	-0.445888	0.022427	0.65136	LDL
1489	palmitoyl ethanolamide	Lipid	Endocannabinoid	-0.43015	0.0223271	0.944813	-0.428356	0.0229546	0.65136	LDL
100002018	5alpha-androstan-3alpha,17beta-diol monosulfate (1)	Lipid	Androgenic Steroids	0.577918	0.103132	0.944813	0.733333	0.0245542	0.65136	LDL
100015967	carotene diol (2)	Cofactors and Vitamins	Vitamin A Metabolism	0.41044	0.0334606	0.944813	0.428026	0.0259286	0.65136	LDL
100015744	ceramide (d18:2/24:1, d18:1/24:2)*	Lipid	Ceramides	-0.705601	0.0226182	0.944813	-0.693012	0.0262929	0.65136	LDL
100001767	pyrraline	Xenobiotics	Food Component/Plant	0.41379	0.0356069	0.944813	0.433578	0.0269093	0.65136	LDL
100004042	N-methylphenylalanine	Amino Acid	Phenylalanine Metabolism	-0.384538	0.0576993	0.944813	-0.442008	0.0269488	0.65136	LDL
100000135	2'-deoxyinosine	Nucleotide	Purine Metabolism, (Hypo)Xanthine/Inosine containing	0.361287	0.0588969	0.944813	0.415218	0.0280035	0.65136	LDL
100001567	1-palmitoyl-GPE (16:0)	Lipid	Lysophospholipid	0.349377	0.0684012	0.944813	0.414671	0.0282319	0.65136	LDL
100010846	propionylglutamine	Amino Acid	Glutamate Metabolism	0.373689	0.0866861	0.944813	0.466535	0.0286166	0.65136	LDL
100015737	ceramide (d18:1/17:0, d17:1/18:0)*	Lipid	Ceramides	-0.70545	0.0337458	0.944813	-0.716667	0.029818	0.65136	LDL
100022610	ceramide (d18:2/16:0, d18:1/16:1, d16:1/18:1)*	Lipid	Ceramides	-0.449277	0.0359391	0.944813	-0.462581	0.0301791	0.65136	LDL
279	cystine	Amino Acid	Methionine, Cysteine, SAM and Taurine Metabolism	-0.484773	0.02222	0.944813	-0.462451	0.0302319	0.65136	LDL
100020859	12-ketolithocholate	Lipid	Secondary Bile Acid Metabolism	-0.41114	0.0297422	0.944813	-0.405912	0.0320972	0.655106	LDL
100001623	3-(2-hydroxyphenyl)propionate	Xenobiotics	Benzoate Metabolism	0.602485	0.065273	0.944813	0.672727	0.0330412	0.655106	LDL
888	caprate (10:0)	Lipid	Medium Chain Fatty Acid	0.303004	0.117032	0.944813	0.403722	0.0331274	0.655106	LDL
100005999	7-hydroxycholesterol (alpha or beta)	Lipid	Sterol	0.49068	0.105293	0.944813	0.615385	0.0331699	0.655106	LDL
100001320	erythronate*	Carbohydrate	Aminosugar Metabolism	0.342858	0.0740823	0.893103	0.359059	0.060592	0.658669	TC
1124	citrate	Energy	TCA Cycle	0.332251	0.0840938	0.948354	0.358511	0.0610141	0.658669	TC
100000011	phenylacetate	Amino Acid	Phenylalanine Metabolism	-0.272023	0.169866	0.948354	-0.365079	0.0611422	0.658669	TC
100000299	xanthosine	Nucleotide	Purine Metabolism, (Hypo)Xanthine/Inosine containing	0.417536	0.0302345	0.769949	0.363248	0.0625509	0.666273	TC
100020241	gamma-glutamylcitrulline*	Peptide	Gamma-glutamyl Amino Acid	0.655844	0.0284402	0.769949	0.572727	0.0655431	0.668232	TC
100002417	2,3-dihydroxyisovalerate	Xenobiotics	Food Component/Plant	0.369755	0.0527919	0.769949	0.351943	0.0662593	0.668232	TC
1004	xanthine	Nucleotide	Purine Metabolism, (Hypo)Xanthine/Inosine containing	0.355183	0.0749792	0.893103	0.366154	0.0658144	0.668232	TC
100001689	pheophorbide A	Xenobiotics	Food Component/Plant	0.334861	0.0877582	0.948354	0.359585	0.0654437	0.668232	TC
100015724	heptadecasphingosine (d17:1)	Lipid	Sphingosines	-0.35227	0.151658	0.948354	-0.442724	0.0657824	0.668232	TC
100001620	glycerophosphoethanolamine	Lipid	Phospholipid Metabolism	0.302683	0.11744	0.948354	0.349754	0.0680833	0.670172	TC
100021277	5-hydroxypicolinic acid	Amino Acid	Tryptophan Metabolism	0.26812	0.167746	0.948354	0.349206	0.0685453	0.670172	TC
1137	oleoyl ethanolamide	Lipid	Endocannabinoid	-0.295961	0.142101	0.948354	-0.362735	0.0685725	0.670172	TC
567	nicotinate	Cofactors and Vitamins	Nicotinate and Nicotinamide Metabolism	0.397533	0.0361839	0.769949	0.347564	0.0699458	0.67597	TC
100000263	imidazole lactate	Amino Acid	Histidine Metabolism	0.237668	0.22329	0.976869	0.34647	0.0708917	0.67597	TC
100001208	1-methyl-4-imidazoleacetate	Amino Acid	Histidine Metabolism	0.258293	0.28566	0.976869	0.422807	0.0713048	0.67597	TC
100020822	dihydrocaffeate sulfate (2)	Xenobiotics	Food Component/Plant	0.44098	0.381408	0.976869	0.771429	0.0723965	0.679524	TC
100003472	(15:2)-anacardic acid	Xenobiotics	Food Component/Plant	0.590124	0.0725097	0.893103	0.587879	0.0738777	0.679962	TC
100002856	glycyrrhetinate	Xenobiotics	Food Component/Plant	0.470522	0.16993	0.948354	0.587879	0.0738777	0.679962	TC
100001073	androsterone sulfate	Lipid	Androgenic Steroids	-0.554273	0.0614705	0.844552	-0.531469	0.0753623	0.686957	TC
100000103	agmatine	Amino Acid	Polyamine Metabolism	0.257629	0.302018	0.976869	0.428277	0.076201	0.687986	TC
187	N('1)-acetylspermidine	Amino Acid	Polyamine Metabolism	0.378261	0.0517176	0.769949	0.338828	0.0838355	0.698587	TC
211	2'-deoxyadenosine	Nucleotide	Purine Metabolism, Adenine containing	0.367829	0.0644948	0.861142	0.349744	0.0798704	0.698587	TC
100020343	tetradecadienoate (14:2)*	Lipid	Long Chain Polyunsaturated Fatty Acid (n3 and n6)	0.390061	0.167969	0.948354	0.485714	0.0782759	0.698587	TC
100002910	1-methyl-5-imidazoleacetate	Amino Acid	Histidine Metabolism	0.282453	0.145308	0.948354	0.336617	0.0798548	0.698587	TC
171	hypoxanthine	Nucleotide	Purine Metabolism, (Hypo)Xanthine/Inosine containing	0.282908	0.144634	0.948354	0.334975	0.0814293	0.698587	TC
1539	1-palmitoyl-2-oleoyl-GPC (16:0/18:1)	Lipid	Phosphatidylcholine (PC)	-0.316172	0.101191	0.948354	-0.334428	0.0819594	0.698587	TC
100004561	N-formylanthranilic acid	Amino Acid	Tryptophan Metabolism	-0.455479	0.101701	0.948354	-0.476923	0.0846484	0.698587	TC
100005818	N-acetyl-S-allyl-cysteine	Xenobiotics	Food Component/Plant	0.312581	0.156677	0.948354	0.373235	0.0870993	0.698587	TC
1442	beta-hydroxyisovalerate	Amino Acid	Leucine, Isoleucine and Valine Metabolism	0.26706	0.169497	0.948354	0.328407	0.0879651	0.698587	TC
100001679	3-dehydroshikimate	Xenobiotics	Food Component/Plant	0.315558	0.116338	0.948354	0.340171	0.0890618	0.698587	TC
100004042	N-methylphenylalanine	Amino Acid	Phenylalanine Metabolism	-0.289911	0.1598	0.948354	-0.345385	0.090836	0.698587	TC
100001300	alpha-hydroxyisovalerate	Amino Acid	Leucine, Isoleucine and Valine Metabolism	0.252739	0.194431	0.962127	0.32567	0.0908028	0.698587	TC
100001219	daidzein	Xenobiotics	Food Component/Plant	0.36971	0.193244	0.962127	0.468132	0.0913764	0.698587	TC
100008929	2-methylcitrate/homocitrate	Energy	TCA Cycle	0.156889	0.425284	0.976869	0.334975	0.0814293	0.698587	TC
1099	guanosine	Nucleotide	Purine Metabolism, Guanine containing	0.212066	0.278645	0.976869	0.333333	0.0830274	0.698587	TC
100001293	N-acetylhistidine	Amino Acid	Histidine Metabolism	0.221178	0.25802	0.976869	0.330049	0.0862951	0.698587	TC
251	biotin	Cofactors and Vitamins	Biotin Metabolism	-0.24978	0.228527	0.976869	-0.348462	0.0878061	0.698587	TC
935	sucrose	Carbohydrate	Disaccharides and Oligosaccharides	0.371004	0.23511	0.976869	0.51049	0.0899137	0.698587	TC
100020242	diacetylspermidine*	Amino Acid	Polyamine Metabolism	0.230417	0.247572	0.976869	0.332112	0.0905559	0.698587	TC
240	3-(4-hydroxyphenyl)lactate	Amino Acid	Tyrosine Metabolism	0.467828	0.0183595	0.769949	0.343077	0.0931594	0.700914	TC
1001	trans-4-hydroxyproline	Amino Acid	Urea cycle; Arginine and Proline Metabolism	0.269919	0.164803	0.948354	0.324028	0.0925384	0.700914	TC
100021071	vitamin D3 sulfate	Cofactors and Vitamins	Vitamin D Metabolism	-0.463182	0.0458061	0.769949	-0.394737	0.0944205	0.704808	TC
100001843	gamma-glutamylalanine	Peptide	Gamma-glutamyl Amino Acid	0.30248	0.171235	0.948354	0.364201	0.0956463	0.70838	TC
100001502	gamma-glutamyl-2-aminobutyrate	Peptide	Gamma-glutamyl Amino Acid	0.480809	0.0962644	0.948354	0.478022	0.0984901	0.716258	TC
888	caprate (10:0)	Lipid	Medium Chain Fatty Acid	0.25818	0.184676	0.948354	0.31746	0.0997321	0.716258	TC
1489	palmitoyl ethanolamide	Lipid	Endocannabinoid	-0.264812	0.173252	0.948354	-0.31746	0.0997321	0.716258	TC
100000784	theanine	Xenobiotics	Food Component/Plant	-0.267398	0.37712	0.976869	-0.478022	0.0984901	0.716258	TC
100001542	ferulate	Xenobiotics	Food Component/Plant	0.382206	0.0447307	0.769949	0.314176	0.103483	0.718047	TC
1310	nicotinamide adenine dinucleotide (NAD+)	Cofactors and Vitamins	Nicotinate and Nicotinamide Metabolism	0.555596	0.0391349	0.769949	0.450549	0.105933	0.718047	TC
100000125	2'-deoxycytidine	Nucleotide	Pyrimidine Metabolism, Cytidine containing	0.406954	0.0316164	0.769949	0.311987	0.106041	0.718047	TC
100001269	campesterol	Lipid	Sterol	-0.402975	0.153106	0.948354	-0.454945	0.102154	0.718047	TC
100020547	21-hydroxypregnanolone monosulfate (1)	Lipid	Pregnenolone Steroids	0.340852	0.180625	0.948354	0.409314	0.102784	0.718047	TC
100001740	mannitol/sorbitol	Carbohydrate	Fructose, Mannose and Galactose Metabolism	0.226138	0.256703	0.976869	0.319902	0.103805	0.718047	TC
100021223	hexanoyltaurine	Lipid	Endocannabinoid	-0.526179	0.362394	0.976869	-0.8	0.104088	0.718047	TC
100002285	2,4-dihydroxybutyrate	Lipid	Fatty Acid, Dihydroxy	0.202497	0.301409	0.976869	0.312534	0.105397	0.718047	TC
926	caproate (6:0)	Lipid	Medium Chain Fatty Acid	0.415459	0.0279036	0.944813	0.38949	0.0404889	0.718487	LDL
100003000	1-(1-enyl-palmitoyl)-GPE (P-16:0)*	Lipid	Lysoplasmalogen	0.347865	0.0957735	0.944813	0.418261	0.0419519	0.718487	LDL
461	phosphate	Energy	Oxidative Phosphorylation	-0.199487	0.308804	0.944813	-0.386205	0.0423603	0.718487	LDL
100001689	pheophorbide A	Xenobiotics	Food Component/Plant	0.311299	0.113974	0.944813	0.392612	0.0427953	0.718487	LDL
100001131	N-methylglutamate	Amino Acid	Glutamate Metabolism	0.437411	0.0287721	0.944813	0.407001	0.0434663	0.718487	LDL
100020879	phenylacetylaspartate	Peptide	Acetylated Peptides	0.361748	0.224538	0.944813	0.565934	0.0437926	0.718487	LDL
100004561	N-formylanthranilic acid	Amino Acid	Tryptophan Metabolism	-0.530926	0.0507642	0.944813	-0.542857	0.044864	0.718487	LDL
536	2'-deoxyuridine	Nucleotide	Pyrimidine Metabolism, Uracil containing	0.322264	0.094431	0.944813	0.381278	0.0452956	0.718487	LDL
100020407	enterolactone sulfate	Xenobiotics	Food Component/Plant	0.410908	0.0642529	0.944813	0.441052	0.0453539	0.718487	LDL
100000406	ribitol	Carbohydrate	Pentose Metabolism	0.510719	0.0213864	0.944813	0.449793	0.0466093	0.718487	LDL
100000103	agmatine	Amino Acid	Polyamine Metabolism	0.363976	0.137585	0.944813	0.469556	0.0492934	0.718487	LDL
100021130	carboxysuccinate	Energy	TCA Cycle	-0.346129	0.0900961	0.944813	-0.396999	0.0494161	0.718487	LDL
100005384	O-sulfo-tyrosine	Xenobiotics	Chemical	-0.59876	0.0142588	0.944813	-0.497059	0.0501336	0.718487	LDL
100015841	erucoylcarnitine (C22:1)*	Lipid	Fatty Acid Metabolism (Acyl Carnitine, Monounsaturated)	-0.64429	0.0323759	0.944813	-0.6	0.0510033	0.718487	LDL
100001620	glycerophosphoethanolamine	Lipid	Phospholipid Metabolism	0.294361	0.128382	0.944813	0.370877	0.0520215	0.718487	LDL
100001634	vanillate	Xenobiotics	Food Component/Plant	0.300732	0.210906	0.944813	0.451075	0.0525731	0.718487	LDL
100000409	2-isopropylmalate	Xenobiotics	Food Component/Plant	0.209558	0.284502	0.944813	0.367045	0.0546887	0.718487	LDL
100008928	2-hydroxybutyrate/2-hydroxyisobutyrate	Amino Acid	Glutathione Metabolism	0.287846	0.137454	0.944813	0.366224	0.055274	0.718487	LDL
100004125	N-propionylmethionine	Amino Acid	Methionine, Cysteine, SAM and Taurine Metabolism	0.322357	0.0943308	0.944813	0.364856	0.0562603	0.718487	LDL
1143	butyrate/isobutyrate (4:0)	Lipid	Short Chain Fatty Acid	0.31488	0.10267	0.944813	0.364034	0.0568587	0.718487	LDL
100020860	3-dehydrodeoxycholate	Lipid	Secondary Bile Acid Metabolism	-0.413423	0.0357868	0.944813	-0.377778	0.0570725	0.718487	LDL
100021519	2-methyl-proline	Amino Acid	Urea cycle; Arginine and Proline Metabolism	0.338122	0.217709	0.944813	0.5	0.0576988	0.718487	LDL
244	beta-alanine	Nucleotide	Pyrimidine Metabolism, Uracil containing	0.314959	0.102579	0.944813	0.362119	0.0582743	0.718487	LDL
827	cytidine	Nucleotide	Pyrimidine Metabolism, Cytidine containing	0.243701	0.211411	0.944813	0.361845	0.0584787	0.718487	LDL
100020824	lithocholic acid sulfate (2)	Lipid	Secondary Bile Acid Metabolism	0.55614	0.0950303	0.944813	0.612121	0.0599721	0.718487	LDL
73	cytidine 2',3'-cyclic monophosphate	Nucleotide	Pyrimidine Metabolism, Cytidine containing	0.495263	0.121381	0.944813	0.581818	0.0604199	0.718487	LDL
100000015	xanthurenate	Amino Acid	Tryptophan Metabolism	-0.606682	0.0279154	0.944813	-0.532967	0.0607365	0.718487	LDL
100001121	pyridoxate	Cofactors and Vitamins	Vitamin B6 Metabolism	-0.260378	0.180834	0.944813	-0.358834	0.0607649	0.718487	LDL
100000098	5-(2-hydroxyethyl)-4-methylthiazole	Cofactors and Vitamins	Thiamine Metabolism	0.443142	0.034192	0.944813	0.39486	0.062227	0.718487	LDL
100001198	myristoleate (14:1n5)	Lipid	Long Chain Monounsaturated Fatty Acid	0.205872	0.312985	0.944813	0.370662	0.0623094	0.718487	LDL
100021277	5-hydroxypicolinic acid	Amino Acid	Tryptophan Metabolism	0.235298	0.228077	0.944813	0.356371	0.0626867	0.718487	LDL
100001267	piperine	Xenobiotics	Food Component/Plant	0.229049	0.270751	0.944813	0.377692	0.0626869	0.718487	LDL
100015966	carotene diol (1)	Cofactors and Vitamins	Vitamin A Metabolism	0.301857	0.118494	0.944813	0.354728	0.063994	0.718487	LDL
187	N('1)-acetylspermidine	Amino Acid	Polyamine Metabolism	0.321199	0.102333	0.944813	0.360861	0.0644245	0.718487	LDL
100001423	4-hydroxyhippurate	Xenobiotics	Benzoate Metabolism	-0.393197	0.0518386	0.944813	-0.373918	0.0655751	0.718487	LDL
100000011	phenylacetate	Amino Acid	Phenylalanine Metabolism	-0.24075	0.226405	0.944813	-0.358724	0.0661385	0.718487	LDL
100003472	(15:2)-anacardic acid	Xenobiotics	Food Component/Plant	0.468112	0.17243	0.944813	0.6	0.066688	0.718487	LDL
100001232	5-dodecenoate (12:1n7)	Lipid	Medium Chain Fatty Acid	0.132068	0.502909	0.944813	0.350896	0.0671265	0.718487	LDL
918	fucose	Carbohydrate	Aminosugar Metabolism	0.345559	0.0716859	0.944813	0.348707	0.0689691	0.718487	LDL
100001313	gamma-glutamylmethionine	Peptide	Gamma-glutamyl Amino Acid	0.375637	0.0534962	0.944813	0.35506	0.0691586	0.718487	LDL
234	aspartate	Amino Acid	Alanine and Aspartate Metabolism	-0.273006	0.159838	0.944813	-0.348159	0.0694358	0.718487	LDL
100001679	3-dehydroshikimate	Xenobiotics	Food Component/Plant	0.276129	0.172108	0.944813	0.360403	0.0705039	0.718487	LDL
100002557	N-methylhydantoin	Amino Acid	Creatine Metabolism	0.841424	0.0357256	0.944813	0.771429	0.0723965	0.718487	LDL
100003869	taurohyodeoxycholic acid	Lipid	Secondary Bile Acid Metabolism	-0.770615	0.0728916	0.944813	-0.771429	0.0723965	0.718487	LDL
100020822	dihydrocaffeate sulfate (2)	Xenobiotics	Food Component/Plant	0.547701	0.260597	0.944813	0.771429	0.0723965	0.718487	LDL
100000989	triethanolamine	Xenobiotics	Chemical	0.258519	0.18408	0.944813	0.34378	0.0732577	0.718487	LDL
62	12,13-DiHOME	Lipid	Fatty Acid, Dihydroxy	-0.424765	0.054939	0.944813	-0.397532	0.0743341	0.718487	LDL
348	2'-deoxyguanosine	Nucleotide	Purine Metabolism, Guanine containing	0.301317	0.119188	0.944813	0.341317	0.0754775	0.718487	LDL
100020343	tetradecadienoate (14:2)*	Lipid	Long Chain Polyunsaturated Fatty Acid (n3 and n6)	0.418471	0.13645	0.944813	0.488449	0.0763645	0.718487	LDL
100015834	lignoceroylcarnitine (C24)*	Lipid	Fatty Acid Metabolism (Acyl Carnitine, Long Chain Saturated)	-0.330828	0.142968	0.944813	-0.394284	0.0769515	0.718487	LDL
100020372	3-indoleglyoxylic acid	Xenobiotics	Food Component/Plant	0.142901	0.468192	0.944813	0.338853	0.0777486	0.718487	LDL
100003674	prolylglycine	Peptide	Dipeptide	-0.284247	0.159332	0.944813	-0.351855	0.0779438	0.718487	LDL
491	pyridoxal	Cofactors and Vitamins	Vitamin B6 Metabolism	0.266803	0.169923	0.944813	0.338579	0.0780042	0.718487	LDL
100000042	3-methylhistidine	Amino Acid	Histidine Metabolism	0.355749	0.08799	0.944813	0.366601	0.0780634	0.718487	LDL
2054	ethylmalonate	Amino Acid	Leucine, Isoleucine and Valine Metabolism	-0.00126947	0.994885	0.998507	-0.358287	0.061188	0.718487	LDL
826	xylose	Carbohydrate	Pentose Metabolism	0.296348	0.133368	0.948354	0.315629	0.108768	0.724289	TC
100020859	12-ketolithocholate	Lipid	Secondary Bile Acid Metabolism	-0.30744	0.111503	0.948354	-0.308155	0.110631	0.724289	TC
100002557	N-methylhydantoin	Amino Acid	Creatine Metabolism	0.691565	0.128027	0.948354	0.714286	0.110787	0.724289	TC
873	thiamin (vitamin B1)	Cofactors and Vitamins	Thiamine Metabolism	0.330019	0.0863257	0.948354	0.306513	0.112642	0.724289	TC
327	flavin adenine dinucleotide (FAD)	Cofactors and Vitamins	Riboflavin Metabolism	0.29161	0.139985	0.948354	0.311355	0.113905	0.724289	TC
100002070	2-hydroxyglutarate	Lipid	Fatty Acid, Dicarboxylate	0.268053	0.167856	0.948354	0.305419	0.113999	0.724289	TC
100003152	N-methyl-GABA	Amino Acid	Glutamate Metabolism	0.263716	0.275304	0.976869	0.378947	0.1096	0.724289	TC
213	N6-methyladenosine	Nucleotide	Purine Metabolism, Adenine containing	0.250356	0.238031	0.976869	0.333913	0.110787	0.724289	TC
100001274	N-acetylthreonine	Amino Acid	Glycine, Serine and Threonine Metabolism	0.188467	0.389124	0.976869	0.339921	0.11252	0.724289	TC
100000257	glucuronate	Carbohydrate	Aminosugar Metabolism	0.155329	0.42996	0.976869	0.304871	0.114681	0.724289	TC
180	linoleate (18:2n6)	Lipid	Long Chain Polyunsaturated Fatty Acid (n3 and n6)	-0.174018	0.375823	0.976869	-0.304324	0.115367	0.724289	TC
889	undecanoate (11:0)	Lipid	Medium Chain Fatty Acid	0.270963	0.163111	0.944813	0.336663	0.079811	0.727508	LDL
100020371	N,N-dimethylalanine	Amino Acid	Alanine and Aspartate Metabolism	0.291545	0.132248	0.948354	0.302135	0.118139	0.732001	TC
100000042	3-methylhistidine	Amino Acid	Histidine Metabolism	0.277563	0.189127	0.954656	0.327826	0.117852	0.732001	TC
100004125	N-propionylmethionine	Amino Acid	Methionine, Cysteine, SAM and Taurine Metabolism	0.258607	0.183926	0.948354	0.30104	0.119544	0.735894	TC
100000841	oxalate (ethanedioate)	Cofactors and Vitamins	Ascorbate and Aldarate Metabolism	0.401685	0.0341095	0.769949	0.298303	0.123109	0.738657	TC
100001131	N-methylglutamate	Amino Acid	Glutamate Metabolism	0.326783	0.110848	0.948354	0.317692	0.121732	0.738657	TC
100003000	1-(1-enyl-palmitoyl)-GPE (P-16:0)*	Lipid	Lysoplasmalogen	0.341243	0.102698	0.948354	0.323478	0.123095	0.738657	TC
100001827	pheophytin A	Xenobiotics	Food Component/Plant	0.244834	0.209228	0.976869	0.298851	0.12239	0.738657	TC
100003152	N-methyl-GABA	Amino Acid	Glutamate Metabolism	0.310069	0.196383	0.944813	0.408772	0.0822663	0.73918	LDL
100020241	gamma-glutamylcitrulline*	Peptide	Gamma-glutamyl Amino Acid	0.530154	0.0934362	0.944813	0.545455	0.082651	0.73918	LDL
100000774	phenyllactate (PLA)	Amino Acid	Phenylalanine Metabolism	0.403366	0.0410166	0.769949	0.309402	0.12403	0.739498	TC
2053	tricarballylate	Energy	TCA Cycle	-0.177153	0.367149	0.944813	-0.332558	0.0837904	0.742367	LDL
194	N-formylmethionine	Amino Acid	Methionine, Cysteine, SAM and Taurine Metabolism	0.229706	0.239643	0.976869	0.296114	0.126018	0.746654	TC
882	thymine	Nucleotide	Pyrimidine Metabolism, Thymine containing	0.341415	0.0753875	0.944813	0.329821	0.086526	0.756277	LDL
100002026	androstenediol (3alpha, 17alpha) monosulfate (2)	Lipid	Androgenic Steroids	0.246879	0.294021	0.944813	0.392481	0.0869559	0.756277	LDL
100000406	ribitol	Carbohydrate	Pentose Metabolism	0.461154	0.0407036	0.769949	0.350376	0.129894	0.764842	TC
100001468	N1-methyl-2-pyridone-5-carboxamide	Cofactors and Vitamins	Nicotinate and Nicotinamide Metabolism	0.339661	0.182251	0.944813	0.421827	0.0916926	0.766166	LDL
100002171	1-margaroyl-GPE (17:0)*	Lipid	Lysophospholipid	0.304394	0.19194	0.944813	0.386466	0.0923416	0.766166	LDL
925	heptanoate (7:0)	Lipid	Medium Chain Fatty Acid	0.377366	0.0477395	0.944813	0.324073	0.0924912	0.766166	LDL
1442	beta-hydroxyisovalerate	Amino Acid	Leucine, Isoleucine and Valine Metabolism	0.159395	0.417834	0.944813	0.322978	0.0936618	0.766166	LDL
100002500	formiminoglutamate	Amino Acid	Histidine Metabolism	-0.273541	0.158989	0.944813	-0.322978	0.0936618	0.766166	LDL
100015968	carotene diol (3)	Cofactors and Vitamins	Vitamin A Metabolism	0.496592	0.25694	0.944813	0.678571	0.0937503	0.766166	LDL
100021712	deoxycholic acid 12-sulfate*	Lipid	Secondary Bile Acid Metabolism	0.635324	0.125211	0.944813	0.678571	0.0937503	0.766166	LDL
100003260	carboxyethyl-GABA	Amino Acid	Glutamate Metabolism	-0.323219	0.0934032	0.944813	-0.321336	0.0954386	0.773298	LDL
100006122	ribulose/xylulose	Carbohydrate	Pentose Metabolism	0.371151	0.0677566	0.884765	0.309231	0.132545	0.775631	TC
100001396	7-methylxanthine	Xenobiotics	Xanthine Metabolism	0.311405	0.351248	0.976869	0.481818	0.133434	0.776045	TC
100009038	myristoyl dihydrosphingomyelin (d18:0/14:0)*	Lipid	Dihydrosphingomyelins	-0.52973	0.115296	0.944813	-0.551515	0.0984012	0.778072	LDL
100015853	arachidoyl ethanolamide (20:0)*	Lipid	Endocannabinoid	0.355526	0.212217	0.944813	0.459341	0.0984684	0.778072	LDL
100022485	N-lactoyl valine	Amino Acid	Lactoyl Amino Acid	-0.438948	0.133464	0.944813	-0.478022	0.0984901	0.778072	LDL
279	cystine	Amino Acid	Methionine, Cysteine, SAM and Taurine Metabolism	-0.301195	0.173151	0.948354	-0.328063	0.136081	0.780059	TC
100022007	bilirubin degradation product, C17H18N2O4 (3)**	Partially Characterized Molecules	Partially Characterized Molecules	0.260553	0.267213	0.976869	0.345865	0.135252	0.780059	TC
100008930	oleate/vaccenate (18:1)	Lipid	Long Chain Monounsaturated Fatty Acid	-0.14682	0.45595	0.976869	-0.288451	0.136593	0.780059	TC
100002014	5alpha-pregnan-3beta,20alpha-diol monosulfate (2)	Lipid	Progestin Steroids	0.449885	0.263374	0.976869	0.571429	0.13896	0.788827	TC
100002459	3-hydroxyvalerate	Lipid	Fatty Acid, Monohydroxy	-0.12419	0.572363	0.980887	-0.317194	0.140275	0.791549	TC
100001468	N1-methyl-2-pyridone-5-carboxamide	Cofactors and Vitamins	Nicotinate and Nicotinamide Metabolism	0.344439	0.175784	0.948354	0.370098	0.143675	0.791995	TC
100000008	benzoate	Xenobiotics	Benzoate Metabolism	0.114586	0.561507	0.976869	0.285167	0.141317	0.791995	TC
1083	N-acetylmethionine	Amino Acid	Methionine, Cysteine, SAM and Taurine Metabolism	0.210778	0.281642	0.976869	0.283525	0.143722	0.791995	TC
100010941	linoleoyl-linoleoyl-glycerol (18:2/18:2) [1]*	Lipid	Diacylglycerol	-0.301071	0.317507	0.976869	-0.428571	0.143971	0.791995	TC
889	undecanoate (11:0)	Lipid	Medium Chain Fatty Acid	0.242981	0.212805	0.976869	0.282978	0.144531	0.791995	TC
100001580	docosapentaenoate (n6 DPA; 22:5n6)	Lipid	Long Chain Polyunsaturated Fatty Acid (n3 and n6)	0.448453	0.312869	0.976869	0.607143	0.148231	0.80311	TC
100022006	bilirubin degradation product, C17H18N2O4 (2)**	Partially Characterized Molecules	Partially Characterized Molecules	0.213716	0.3275	0.976869	0.311265	0.148253	0.80311	TC
100005945	acetylagmatine	Amino Acid	Polyamine Metabolism	0.921846	0.0259183	0.944813	0.8	0.104088	0.811134	LDL
361	inosine	Nucleotide	Purine Metabolism, (Hypo)Xanthine/Inosine containing	0.24328	0.212225	0.944813	0.313398	0.104386	0.811134	LDL
100001790	glycylisoleucine	Peptide	Dipeptide	-0.292558	0.130848	0.944813	-0.312577	0.105347	0.81194	LDL
100004272	biocytin	Cofactors and Vitamins	Biotin Metabolism	-0.31226	0.18013	0.944813	-0.371429	0.106871	0.812293	LDL
100000101	pimelate (C7-DC)	Lipid	Fatty Acid, Dicarboxylate	-0.263985	0.235179	0.944813	-0.350748	0.109499	0.812293	LDL
100001103	glutamate, gamma-methyl ester	Amino Acid	Glutamate Metabolism	0.3201	0.10358	0.944813	0.314151	0.110525	0.812293	LDL
100006115	arabonate/xylonate	Carbohydrate	Pentose Metabolism	0.107125	0.587423	0.944813	0.308198	0.110579	0.812293	LDL
100015638	2-hydroxynervonate*	Lipid	Fatty Acid, Monohydroxy	-0.190244	0.332208	0.944813	-0.308198	0.110579	0.812293	LDL
100000445	theobromine	Xenobiotics	Xanthine Metabolism	0.389368	0.151418	0.944813	0.428955	0.110606	0.812293	LDL
100008981	1-oleoyl-2-linoleoyl-GPC (18:1/18:2)*	Lipid	Phosphatidylcholine (PC)	-0.291327	0.212687	0.944813	-0.367055	0.11139	0.812293	LDL
1052	glycerate	Carbohydrate	Glycolysis, Gluconeogenesis, and Pyruvate Metabolism	0.230269	0.238461	0.976869	0.278599	0.151117	0.81397	TC
100003210	valylleucine	Peptide	Dipeptide	-0.287066	0.13857	0.944813	-0.306555	0.112591	0.814778	LDL
100008920	sphingomyelin (d18:1/17:0, d17:1/18:0, d19:1/16:0)	Lipid	Sphingomyelins	-0.724097	0.0422404	0.769949	-0.547619	0.160026	0.815615	TC
407	lysine	Amino Acid	Lysine Metabolism	0.298367	0.123025	0.948354	0.277504	0.152796	0.815615	TC
1136	valerate (5:0)	Lipid	Short Chain Fatty Acid	0.275882	0.155309	0.948354	0.275315	0.156196	0.815615	TC
100001994	androstenediol (3beta,17beta) disulfate (2)	Lipid	Androgenic Steroids	0.384564	0.156973	0.948354	0.382143	0.159824	0.815615	TC
100000773	3-hydroxyoctanoate	Lipid	Fatty Acid, Monohydroxy	-0.523662	0.182866	0.948354	-0.547619	0.160026	0.815615	TC
100001070	7,12-diketolithocholate	Lipid	Secondary Bile Acid Metabolism	0.575773	0.135293	0.948354	0.547619	0.160026	0.815615	TC
100010873	1,2-dilinoleoyl-digalactosylglycerol (18:2/18:2)*	Lipid	Galactosyl Glycerolipids	-0.308026	0.245783	0.976869	-0.373529	0.154122	0.815615	TC
100001276	N-acetylisoleucine	Amino Acid	Leucine, Isoleucine and Valine Metabolism	0.160097	0.434656	0.976869	0.287521	0.154373	0.815615	TC
100000943	2-oleoylglycerol (18:1)	Lipid	Monoacylglycerol	-0.376895	0.461426	0.976869	-0.657143	0.156175	0.815615	TC
100020502	sulfate of piperine metabolite C18H21NO3 (1)*	Xenobiotics	Food Component/Plant	-0.482642	0.22576	0.976869	-0.547619	0.160026	0.815615	TC
535	uridine	Nucleotide	Pyrimidine Metabolism, Uracil containing	0.241097	0.216484	0.944813	0.304366	0.115314	0.81601	LDL
100001789	sucralose	Xenobiotics	Food Component/Plant	0.546226	0.128124	0.944813	0.560674	0.116327	0.81601	LDL
100000039	methionine sulfoxide	Amino Acid	Methionine, Cysteine, SAM and Taurine Metabolism	-0.230759	0.237436	0.944813	-0.303271	0.116694	0.81601	LDL
100002773	solanidine	Xenobiotics	Food Component/Plant	0.234284	0.293976	0.944813	0.343971	0.117007	0.81601	LDL
1140	gamma-glutamylglutamine	Peptide	Gamma-glutamyl Amino Acid	-0.331651	0.178791	0.944813	-0.382034	0.117699	0.81601	LDL
100003432	dihydroferulate	Xenobiotics	Food Component/Plant	0.0833088	0.673416	0.944813	0.302176	0.118087	0.81601	LDL
100002014	5alpha-pregnan-3beta,20alpha-diol monosulfate (2)	Lipid	Progestin Steroids	0.459481	0.252052	0.944813	0.595238	0.11953	0.81601	LDL
100015654	OAHSA (18:1/OH-18:0)	Lipid	Fatty Acid Hydroxyl Fatty Acid	-0.244756	0.228177	0.944813	-0.312874	0.119647	0.81601	LDL
100002171	1-margaroyl-GPE (17:0)*	Lipid	Lysophospholipid	0.361322	0.117522	0.948354	0.324812	0.162323	0.820064	TC
100001919	syringic acid	Xenobiotics	Food Component/Plant	0.334736	0.174537	0.948354	0.343653	0.162629	0.820064	TC
100002910	1-methyl-5-imidazoleacetate	Amino Acid	Histidine Metabolism	0.22222	0.255727	0.944813	0.299713	0.121264	0.821128	LDL
100001594	beta-hydroxyisovaleroylcarnitine	Amino Acid	Leucine, Isoleucine and Valine Metabolism	0.257957	0.185069	0.948354	0.269294	0.165821	0.823426	TC
572	glucose	Carbohydrate	Glycolysis, Gluconeogenesis, and Pyruvate Metabolism	0.263124	0.176113	0.948354	0.268747	0.166716	0.823426	TC
62	12,13-DiHOME	Lipid	Fatty Acid, Dihydroxy	-0.335394	0.1372	0.948354	-0.306494	0.176594	0.823426	TC
100000015	xanthurenate	Amino Acid	Tryptophan Metabolism	-0.408179	0.166166	0.948354	-0.395604	0.180889	0.823426	TC
100020860	3-dehydrodeoxycholate	Lipid	Secondary Bile Acid Metabolism	-0.280805	0.164664	0.948354	-0.270427	0.181499	0.823426	TC
100010878	1-linoleoyl-2-linolenoyl-galactosylglycerol (18:2/18:3)*	Lipid	Galactosyl Glycerolipids	0.451966	0.140188	0.948354	0.412587	0.182564	0.823426	TC
100001204	1-methylhistamine	Amino Acid	Histidine Metabolism	-0.75758	0.137952	0.948354	-0.7	0.18812	0.823426	TC
100000463	indolelactate	Amino Acid	Tryptophan Metabolism	0.259003	0.18323	0.948354	0.255063	0.190222	0.823426	TC
100006435	N-acetylglucosamine/N-acetylgalactosamine	Carbohydrate	Aminosugar Metabolism	0.252503	0.194861	0.962127	0.260536	0.180559	0.823426	TC
100000445	theobromine	Xenobiotics	Xanthine Metabolism	0.356068	0.19271	0.962127	0.364286	0.18191	0.823426	TC
100021376	3-hydroxymargaroylglycine	Lipid	Fatty Acid Metabolism (Acyl Glycine)	0.237567	0.263651	0.976869	0.290435	0.168584	0.823426	TC
100008928	2-hydroxybutyrate/2-hydroxyisobutyrate	Amino Acid	Glutathione Metabolism	0.212381	0.277916	0.976869	0.267105	0.169423	0.823426	TC
100015666	glycerophosphoserine*	Lipid	Phospholipid Metabolism	0.261159	0.228723	0.976869	0.295455	0.171087	0.823426	TC
231	arginine	Amino Acid	Urea cycle; Arginine and Proline Metabolism	0.21199	0.278822	0.976869	0.26601	0.171244	0.823426	TC
100001462	1-stearoyl-GPG (18:0)	Lipid	Lysophospholipid	0.254612	0.341278	0.976869	0.358824	0.172304	0.823426	TC
100015853	arachidoyl ethanolamide (20:0)*	Lipid	Endocannabinoid	0.361606	0.203947	0.976869	0.384615	0.174509	0.823426	TC
100020715	heptadecatrienoate (17:3)*	Lipid	Long Chain Polyunsaturated Fatty Acid (n3 and n6)	0.291446	0.226034	0.976869	0.324561	0.175186	0.823426	TC
100002013	5alpha-pregnan-3beta,20alpha-diol monosulfate (1)	Lipid	Progestin Steroids	-0.186149	0.406857	0.976869	-0.299831	0.175203	0.823426	TC
100001992	androstenediol (3beta,17beta) disulfate (1)	Lipid	Androgenic Steroids	0.308029	0.264025	0.976869	0.367857	0.177342	0.823426	TC
100002514	hydantoin-5-propionate	Amino Acid	Histidine Metabolism	0.327442	0.325631	0.976869	0.436364	0.179665	0.823426	TC
100000826	lactobionate	Carbohydrate	Disaccharides and Oligosaccharides	0.169507	0.407768	0.976869	0.271111	0.180355	0.823426	TC
244	beta-alanine	Nucleotide	Pyrimidine Metabolism, Uracil containing	0.233213	0.232346	0.976869	0.260536	0.180559	0.823426	TC
100002528	sulfate*	Xenobiotics	Chemical	0.19384	0.322979	0.976869	0.260536	0.180559	0.823426	TC
1748	dopamine	Amino Acid	Tyrosine Metabolism	0.188555	0.366715	0.976869	0.273846	0.185297	0.823426	TC
75	uridine-2',3'-cyclic monophosphate	Nucleotide	Pyrimidine Metabolism, Uracil containing	0.197712	0.365843	0.976869	0.285573	0.186538	0.823426	TC
100001026	galactonate	Carbohydrate	Fructose, Mannose and Galactose Metabolism	0.249758	0.218509	0.976869	0.266325	0.188473	0.823426	TC
100001619	glycerophosphoglycerol	Lipid	Glycerolipid Metabolism	0.212035	0.288342	0.976869	0.260684	0.189082	0.823426	TC
100021130	carboxysuccinate	Energy	TCA Cycle	-0.136169	0.516325	0.976869	-0.271538	0.189178	0.823426	TC
100015755	ceramide (d18:1/20:0, d16:1/22:0, d20:1/18:0)*	Lipid	Ceramides	-0.158066	0.589403	0.980887	-0.375824	0.18541	0.823426	TC
461	phosphate	Energy	Oxidative Phosphorylation	-0.0851925	0.666448	0.989602	-0.268747	0.166716	0.823426	TC
100001198	myristoleate (14:1n5)	Lipid	Long Chain Monounsaturated Fatty Acid	0.0787037	0.702337	0.989602	0.265641	0.189653	0.823426	TC
100015654	OAHSA (18:1/OH-18:0)	Lipid	Fatty Acid Hydroxyl Fatty Acid	-0.251713	0.214806	0.976869	-0.264274	0.192029	0.827469	TC
100015839	dihomo-linoleoylcarnitine (C20:2)*	Lipid	Fatty Acid Metabolism (Acyl Carnitine, Polyunsaturated)	0.33304	0.176867	0.944813	0.376677	0.123372	0.828181	LDL
100000934	digalacturonic acid	Xenobiotics	Food Component/Plant	0.660053	0.0195005	0.944813	0.468531	0.124455	0.828181	LDL
100020838	5-methylhexanoate (i7:0)	Lipid	Fatty Acid, Branched	0.463511	0.151026	0.944813	0.490909	0.125204	0.828181	LDL
100022007	bilirubin degradation product, C17H18N2O4 (3)**	Partially Characterized Molecules	Partially Characterized Molecules	0.258773	0.270614	0.944813	0.353516	0.126254	0.828181	LDL
100001207	4-imidazoleacetate	Amino Acid	Histidine Metabolism	0.261286	0.179263	0.944813	0.295333	0.127067	0.828181	LDL
100002619	sedoheptulose	Carbohydrate	Pentose Metabolism	0.308117	0.134017	0.944813	0.311983	0.128954	0.828181	LDL
100000826	lactobionate	Carbohydrate	Disaccharides and Oligosaccharides	0.182364	0.372578	0.944813	0.305351	0.129289	0.828181	LDL
100000010	3-phenylpropionate (hydrocinnamate)	Xenobiotics	Benzoate Metabolism	0.286721	0.139067	0.944813	0.293691	0.129294	0.828181	LDL
30	mevalonate	Lipid	Mevalonate Metabolism	0.226095	0.277148	0.976869	0.269231	0.193114	0.82838	TC
100002054	3,5-dihydroxybenzoic acid	Xenobiotics	Benzoate Metabolism	0.41471	0.158832	0.948354	0.384615	0.194413	0.830196	TC
100006314	sphingomyelin (d17:1/16:0, d18:1/15:0, d16:1/17:0)*	Lipid	Sphingomyelins	-0.387015	0.171607	0.944813	-0.424176	0.130637	0.831169	LDL
100000096	4-guanidinobutanoate	Amino Acid	Guanidino and Acetamido Metabolism	0.311143	0.107039	0.948354	0.251779	0.196189	0.834022	TC
241	phenylpyruvate	Amino Acid	Phenylalanine Metabolism	-0.202359	0.354452	0.976869	-0.278656	0.197904	0.837559	TC
100022006	bilirubin degradation product, C17H18N2O4 (2)**	Partially Characterized Molecules	Partially Characterized Molecules	0.248174	0.253536	0.944813	0.322708	0.133132	0.837996	LDL
100001568	1-myristoyl-GPE (14:0)	Lipid	Lysophospholipid	0.331429	0.179099	0.944813	0.365514	0.135806	0.837996	LDL
100001403	5-acetylamino-6-amino-3-methyluracil	Xenobiotics	Xanthine Metabolism	-0.22865	0.24187	0.944813	-0.287943	0.137316	0.837996	LDL
100001765	3-methyladipate	Lipid	Fatty Acid, Dicarboxylate	-0.234636	0.269763	0.944813	-0.312242	0.137428	0.837996	LDL
100000765	levulinate (4-oxovalerate)	Xenobiotics	Food Component/Plant	0.424488	0.169009	0.944813	0.454545	0.137658	0.837996	LDL
100000447	gentisate	Amino Acid	Tyrosine Metabolism	0.23963	0.238374	0.944813	0.298855	0.13806	0.837996	LDL
100000773	3-hydroxyoctanoate	Lipid	Fatty Acid, Monohydroxy	-0.330797	0.423518	0.944813	-0.571429	0.13896	0.837996	LDL
100015755	ceramide (d18:1/20:0, d16:1/22:0, d20:1/18:0)*	Lipid	Ceramides	-0.25085	0.387017	0.944813	-0.415842	0.139186	0.837996	LDL
100001257	N-acetylasparagine	Amino Acid	Alanine and Aspartate Metabolism	-0.36733	0.196349	0.944813	-0.415385	0.139666	0.837996	LDL
251	biotin	Cofactors and Vitamins	Biotin Metabolism	-0.125047	0.551461	0.944813	-0.301981	0.142346	0.841694	LDL
100000292	protoporphyrin IX	Cofactors and Vitamins	Hemoglobin and Porphyrin Metabolism	-0.265172	0.172647	0.944813	-0.283564	0.143665	0.841694	LDL
100001721	N2-acetyllysine	Amino Acid	Lysine Metabolism	0.167214	0.395055	0.944813	0.283564	0.143665	0.841694	LDL
100003265	2-oxo-1-pyrrolidinepropionate	Xenobiotics	Chemical	0.363999	0.165751	0.944813	0.382353	0.143859	0.841694	LDL
100001662	deoxycarnitine	Lipid	Carnitine Metabolism	-0.19777	0.313072	0.944813	-0.281648	0.146509	0.841694	LDL
298	2'-deoxycytidine 5'-monophosphate	Nucleotide	Pyrimidine Metabolism, Cytidine containing	0.326922	0.216488	0.944813	0.379412	0.147227	0.841694	LDL
100003169	isoleucylglycine	Peptide	Dipeptide	-0.324956	0.0915548	0.944813	-0.280279	0.148564	0.841694	LDL
100001293	N-acetylhistidine	Amino Acid	Histidine Metabolism	0.15413	0.433574	0.944813	0.279732	0.149392	0.841694	LDL
100003397	trimethylamine N-oxide	Lipid	Phospholipid Metabolism	0.201329	0.304266	0.944813	0.279732	0.149392	0.841694	LDL
100001594	beta-hydroxyisovaleroylcarnitine	Amino Acid	Leucine, Isoleucine and Valine Metabolism	0.277508	0.15279	0.944813	0.278911	0.150641	0.841694	LDL
100010940	diacylglycerol (16:1/18:2 [2], 16:0/18:3 [1])*	Lipid	Diacylglycerol	0.277408	0.161239	0.944813	0.283621	0.151676	0.841694	LDL
100000086	ciliatine (2-aminoethylphosphonate)	Xenobiotics	Food Component/Plant	0.722373	0.104916	0.944813	0.657143	0.156175	0.841694	LDL
100004523	N-delta-acetylornithine	Amino Acid	Urea cycle; Arginine and Proline Metabolism	0.332905	0.083448	0.944813	0.273984	0.158288	0.841694	LDL
100001987	5alpha-androstan-3beta,17beta-diol disulfate	Lipid	Androgenic Steroids	0.501792	0.205145	0.944813	0.547619	0.160026	0.841694	LDL
100001276	N-acetylisoleucine	Amino Acid	Leucine, Isoleucine and Valine Metabolism	0.198059	0.332099	0.944813	0.283125	0.161055	0.841694	LDL
100002204	N-acetyl-3-methylhistidine*	Amino Acid	Histidine Metabolism	0.195406	0.437127	0.944813	0.343653	0.162629	0.841694	LDL
30	mevalonate	Lipid	Mevalonate Metabolism	0.182386	0.382885	0.944813	0.287748	0.16308	0.841694	LDL
1099	guanosine	Nucleotide	Purine Metabolism, Guanine containing	0.164893	0.401743	0.944813	0.269331	0.165761	0.841694	LDL
100001300	alpha-hydroxyisovalerate	Amino Acid	Leucine, Isoleucine and Valine Metabolism	0.215574	0.270584	0.944813	0.269331	0.165761	0.841694	LDL
100015666	glycerophosphoserine*	Lipid	Phospholipid Metabolism	0.251926	0.246195	0.944813	0.298987	0.165786	0.841694	LDL
100002285	2,4-dihydroxybutyrate	Lipid	Fatty Acid, Dihydroxy	0.142993	0.467904	0.944813	0.269057	0.166208	0.841694	LDL
231	arginine	Amino Acid	Urea cycle; Arginine and Proline Metabolism	0.197436	0.313908	0.944813	0.268783	0.166656	0.841694	LDL
100000631	N-oleoyl-sphingosine (d18:1/18:1)*	Lipid	Ceramides	-0.376398	0.0580601	0.944813	-0.279022	0.167475	0.841694	LDL
100010873	1,2-dilinoleoyl-digalactosylglycerol (18:2/18:2)*	Lipid	Galactosyl Glycerolipids	-0.392213	0.132952	0.944813	-0.362031	0.168222	0.841694	LDL
100020723	(3'-5')-adenylyladenosine*	Nucleotide	Dinucleotide	0.156677	0.562273	0.944813	0.361765	0.168559	0.841694	LDL
1518	N-palmitoyl-sphingosine (d18:1/16:0)	Lipid	Ceramides	-0.255342	0.189721	0.944813	-0.267415	0.168909	0.841694	LDL
1090	bilirubin (Z,Z)	Cofactors and Vitamins	Hemoglobin and Porphyrin Metabolism	0.110785	0.590041	0.944813	0.277996	0.169108	0.841694	LDL
100001126	gamma-glutamylvaline	Peptide	Gamma-glutamyl Amino Acid	-0.274229	0.184658	0.944813	-0.283516	0.169634	0.841694	LDL
100001951	bilirubin (E,Z or Z,E)*	Cofactors and Vitamins	Hemoglobin and Porphyrin Metabolism	0.256935	0.445645	0.944813	0.445455	0.169733	0.841694	LDL
100004250	4-hydroxycyclohexylcarboxylic acid	Xenobiotics	Food Component/Plant	0.30294	0.254069	0.944813	0.360559	0.170087	0.841694	LDL
100020242	diacetylspermidine*	Amino Acid	Polyamine Metabolism	0.181632	0.364565	0.944813	0.271714	0.17037	0.841694	LDL
100002397	alpha-ketoglutaramate*	Amino Acid	Glutamate Metabolism	0.237609	0.242476	0.944813	0.275945	0.172406	0.841694	LDL
100001994	androstenediol (3beta,17beta) disulfate (2)	Lipid	Androgenic Steroids	0.265154	0.33953	0.944813	0.371429	0.17285	0.841694	LDL
100001058	nicotinic acid mononucleotide (NaMN)	Cofactors and Vitamins	Nicotinate and Nicotinamide Metabolism	0.361962	0.304046	0.944813	0.466667	0.173939	0.841694	LDL
100020547	21-hydroxypregnanolone monosulfate (1)	Lipid	Pregnenolone Steroids	0.352004	0.16586	0.944813	0.345588	0.174252	0.841694	LDL
100009064	(3'-5')-guanylylcytidine	Nucleotide	Dinucleotide	-0.447435	0.125257	0.944813	-0.401099	0.174357	0.841694	LDL
211	2'-deoxyadenosine	Nucleotide	Purine Metabolism, Adenine containing	0.233858	0.250213	0.944813	0.274577	0.17463	0.841694	LDL
100001805	methylphosphate	Nucleotide	Purine and Pyrimidine Metabolism	-0.134816	0.493984	0.944813	-0.263309	0.175797	0.841694	LDL
100010927	linoleoyl-linolenoyl-glycerol (18:2/18:3) [2]*	Lipid	Diacylglycerol	0.326404	0.0900355	0.944813	0.263309	0.175797	0.841694	LDL
100000008	benzoate	Xenobiotics	Benzoate Metabolism	0.0475527	0.810106	0.959135	0.276721	0.154006	0.841694	LDL
100001067	dehydrolithocholate	Lipid	Secondary Bile Acid Metabolism	-0.150878	0.443454	0.944813	-0.262762	0.17673	0.84191	LDL
100002196	13-HODE + 9-HODE	Lipid	Fatty Acid, Monohydroxy	-0.190174	0.396602	0.976869	-0.28402	0.200198	0.843502	TC
100019960	2-hydroxyheptanoate*	Lipid	Fatty Acid, Monohydroxy	0.203654	0.339835	0.944813	0.283975	0.17869	0.845048	LDL
1083	N-acetylmethionine	Amino Acid	Methionine, Cysteine, SAM and Taurine Metabolism	0.182039	0.353864	0.944813	0.259751	0.181924	0.845048	LDL
100015609	N-palmitoyl-sphingadienine (d18:2/16:0)*	Lipid	Ceramides	-0.362882	0.246319	0.944813	-0.412587	0.182564	0.845048	LDL
100002382	2-aminophenol	Xenobiotics	Food Component/Plant	-0.167158	0.395216	0.944813	-0.25893	0.183359	0.845048	LDL
100015724	heptadecasphingosine (d17:1)	Lipid	Sphingosines	-0.249269	0.318523	0.944813	-0.327141	0.185133	0.845048	LDL
100001269	campesterol	Lipid	Sterol	-0.389073	0.169143	0.944813	-0.375824	0.18541	0.845048	LDL
100001279	hyocholate	Lipid	Secondary Bile Acid Metabolism	0.347505	0.244662	0.944813	0.39011	0.187574	0.845048	LDL
100001204	1-methylhistamine	Amino Acid	Histidine Metabolism	-0.63118	0.253474	0.944813	-0.7	0.18812	0.845048	LDL
100004322	2-aminophenol sulfate	Xenobiotics	Food Component/Plant	0.505322	0.385144	0.944813	0.7	0.18812	0.845048	LDL
100020203	3-hydroxystachydrine*	Xenobiotics	Food Component/Plant	0.53753	0.350154	0.944813	0.7	0.18812	0.845048	LDL
100004533	valerylphenylalanine	Amino Acid	Phenylalanine Metabolism	0.229533	0.34451	0.944813	0.31505	0.188913	0.845048	LDL
1087	erucate (22:1n9)	Lipid	Long Chain Monounsaturated Fatty Acid	-0.225509	0.248576	0.944813	-0.255372	0.189668	0.845048	LDL
100001946	cyclo(gly-pro)	Peptide	Dipeptide	0.212463	0.33041	0.944813	0.283173	0.19043	0.845048	LDL
100001740	mannitol/sorbitol	Carbohydrate	Fructose, Mannose and Galactose Metabolism	0.254848	0.199536	0.944813	0.259808	0.190626	0.845048	LDL
100000774	phenyllactate (PLA)	Amino Acid	Phenylalanine Metabolism	0.371432	0.0617252	0.944813	0.265003	0.19076	0.845048	LDL
100001022	threonate	Cofactors and Vitamins	Ascorbate and Aldarate Metabolism	0.164115	0.403999	0.944813	0.253729	0.19263	0.849362	LDL
100003641	valylglycine	Peptide	Dipeptide	-0.25473	0.190821	0.944813	-0.252361	0.195122	0.85019	LDL
100002054	3,5-dihydroxybenzoic acid	Xenobiotics	Benzoate Metabolism	0.334221	0.264373	0.944813	0.382394	0.197222	0.85019	LDL
873	thiamin (vitamin B1)	Cofactors and Vitamins	Thiamine Metabolism	0.198545	0.311141	0.944813	0.250992	0.197637	0.85019	LDL
1001	trans-4-hydroxyproline	Amino Acid	Urea cycle; Arginine and Proline Metabolism	0.126772	0.520333	0.944813	0.250718	0.198142	0.85019	LDL
100000257	glucuronate	Carbohydrate	Aminosugar Metabolism	0.109581	0.578835	0.944813	0.250718	0.198142	0.85019	LDL
100019966	3-hydroxyoleate*	Lipid	Fatty Acid, Monohydroxy	-0.401251	0.196088	0.944813	-0.398601	0.199335	0.85019	LDL
100003109	2-oxindole-3-acetate	Xenobiotics	Food Component/Plant	0.267784	0.185971	0.944813	0.258848	0.201655	0.85019	LDL
445	orotate	Nucleotide	Pyrimidine Metabolism, Orotate containing	-0.12528	0.525293	0.944813	-0.248803	0.201707	0.85019	LDL
100003678	prolylproline	Peptide	Dipeptide	-0.339525	0.0771245	0.944813	-0.248803	0.201707	0.85019	LDL
100015735	ceramide (d18:1/14:0, d16:1/16:0)*	Lipid	Ceramides	-0.259447	0.191265	0.944813	-0.252175	0.204454	0.85019	LDL
100001461	1-stearoyl-GPE (18:0)	Lipid	Lysophospholipid	0.18054	0.377459	0.944813	0.257138	0.204755	0.85019	LDL
100001258	glycylleucine	Peptide	Dipeptide	-0.272372	0.160848	0.944813	-0.246887	0.205315	0.85019	LDL
100001070	7,12-diketolithocholate	Lipid	Secondary Bile Acid Metabolism	0.609799	0.108452	0.944813	0.5	0.207031	0.85019	LDL
100001541	2-hydroxy-3-methylvalerate	Amino Acid	Leucine, Isoleucine and Valine Metabolism	0.48284	0.225542	0.944813	0.5	0.207031	0.85019	LDL
100020219	3-formylindole	Xenobiotics	Food Component/Plant	0.217419	0.266404	0.944813	0.245792	0.207396	0.85019	LDL
100001320	erythronate*	Carbohydrate	Aminosugar Metabolism	0.173593	0.377008	0.944813	0.245518	0.207919	0.85019	LDL
100004535	2-methylbutyrylphenylalanine	Xenobiotics	Benzoate Metabolism	-0.328629	0.29697	0.944813	-0.391608	0.208063	0.85019	LDL
100001334	N-acetylproline	Amino Acid	Urea cycle; Arginine and Proline Metabolism	0.197716	0.313206	0.976869	0.247947	0.203311	0.852828	TC
100001103	glutamate, gamma-methyl ester	Amino Acid	Glutamate Metabolism	0.340817	0.0819193	0.942168	0.247253	0.213726	0.854221	TC
100001988	5alpha-pregnan-3beta,20alpha-diol disulfate	Lipid	Progestin Steroids	0.67687	0.13975	0.948354	0.6	0.208	0.854221	TC
100001495	pantetheine	Cofactors and Vitamins	Pantothenate and CoA Metabolism	0.291519	0.157392	0.948354	0.258462	0.212223	0.854221	TC
100004575	N2,N5-diacetylornithine	Amino Acid	Urea cycle; Arginine and Proline Metabolism	0.455779	0.136458	0.948354	0.384615	0.21702	0.854221	TC
100001403	5-acetylamino-6-amino-3-methyluracil	Xenobiotics	Xanthine Metabolism	-0.243615	0.211576	0.976869	-0.246305	0.206418	0.854221	TC
298	2'-deoxycytidine 5'-monophosphate	Nucleotide	Pyrimidine Metabolism, Cytidine containing	0.213264	0.427751	0.976869	0.332353	0.2085	0.854221	TC
98	kynurenate	Amino Acid	Tryptophan Metabolism	0.174656	0.374047	0.976869	0.245211	0.208506	0.854221	TC
100002204	N-acetyl-3-methylhistidine*	Amino Acid	Histidine Metabolism	0.1543	0.540987	0.976869	0.31063	0.209625	0.854221	TC
100002398	piperidine	Xenobiotics	Food Component/Plant	0.202818	0.300628	0.976869	0.242474	0.213791	0.854221	TC
100001040	1-linoleoylglycerol (18:2)	Lipid	Monoacylglycerol	-0.452675	0.307769	0.976869	-0.535714	0.215217	0.854221	TC
100006372	gentisic acid-5-glucoside	Xenobiotics	Chemical	-0.472336	0.284507	0.976869	-0.535714	0.215217	0.854221	TC
100020879	phenylacetylaspartate	Peptide	Acetylated Peptides	0.220371	0.469393	0.976869	0.368132	0.215857	0.854221	TC
1629	taurochenodeoxycholate	Lipid	Primary Bile Acid Metabolism	-0.341904	0.212278	0.976869	-0.339286	0.216029	0.854221	TC
100021256	3,5-dihydroxyphenylpropionate	Xenobiotics	Benzoate Metabolism	-0.281125	0.291543	0.976869	-0.326471	0.217159	0.854221	TC
100001058	nicotinic acid mononucleotide (NaMN)	Cofactors and Vitamins	Nicotinate and Nicotinamide Metabolism	0.191612	0.595901	0.980887	0.430303	0.214492	0.854221	TC
100001675	4-hydroxycinnamate	Xenobiotics	Food Component/Plant	0.341437	0.0753674	0.893103	0.235906	0.226843	0.854552	TC
100000010	3-phenylpropionate (hydrocinnamate)	Xenobiotics	Benzoate Metabolism	0.312192	0.105799	0.948354	0.23919	0.220252	0.854552	TC
50	spermidine	Amino Acid	Polyamine Metabolism	0.344654	0.107285	0.948354	0.263834	0.223818	0.854552	TC
100010901	gamma-glutamyl-alpha-lysine	Peptide	Gamma-glutamyl Amino Acid	0.285195	0.167012	0.948354	0.250769	0.226628	0.854552	TC
100001617	undecanedioate (C11-DC)	Lipid	Fatty Acid, Dicarboxylate	0.218143	0.264776	0.976869	0.239737	0.219166	0.854552	TC
100001335	eicosenoate (20:1)	Lipid	Long Chain Monounsaturated Fatty Acid	-0.149847	0.455661	0.976869	-0.2442	0.219617	0.854552	TC
100001207	4-imidazoleacetate	Amino Acid	Histidine Metabolism	0.186669	0.341543	0.976869	0.238095	0.222434	0.854552	TC
100010917	palmitoyl-oleoyl-glycerol (16:0/18:1) [2]*	Lipid	Diacylglycerol	-0.4106	0.272317	0.976869	-0.45	0.224216	0.854552	TC
100006438	citraconate/glutaconate	Energy	TCA Cycle	0.213804	0.274632	0.976869	0.235359	0.227954	0.854552	TC
100019981	heptenedioate (C7:1-DC)*	Lipid	Fatty Acid, Dicarboxylate	-0.179766	0.389873	0.976869	-0.25	0.228103	0.854552	TC
100000447	gentisate	Amino Acid	Tyrosine Metabolism	0.142367	0.487821	0.976869	0.244444	0.228787	0.854552	TC
100020824	lithocholic acid sulfate (2)	Lipid	Secondary Bile Acid Metabolism	0.406455	0.24378	0.976869	0.418182	0.229113	0.854552	TC
100003674	prolylglycine	Peptide	Dipeptide	-0.197482	0.33354	0.976869	-0.243761	0.230133	0.854552	TC
875	p-aminobenzoate (PABA)	Xenobiotics	Benzoate Metabolism	-0.298177	0.322409	0.976869	-0.357143	0.23093	0.854552	TC
100004533	valerylphenylalanine	Amino Acid	Phenylalanine Metabolism	0.213418	0.380334	0.976869	0.287719	0.232298	0.854552	TC
922	N-stearoyl-sphinganine (d18:0/18:0)*	Lipid	Dihydroceramides	-0.122624	0.55926	0.976869	-0.247692	0.232568	0.854552	TC
2053	tricarballylate	Energy	TCA Cycle	-0.101972	0.60562	0.981757	-0.237001	0.224631	0.854552	TC
1024	pantothenate	Cofactors and Vitamins	Pantothenate and CoA Metabolism	0.195091	0.319804	0.976869	0.232622	0.233565	0.854902	TC
100008930	oleate/vaccenate (18:1)	Lipid	Long Chain Monounsaturated Fatty Acid	-0.197513	0.313714	0.944813	-0.243328	0.212132	0.855774	LDL
100020217	N,N,N-trimethyl-alanylproline betaine (TMAP)	Amino Acid	Urea cycle; Arginine and Proline Metabolism	0.32927	0.182121	0.944813	0.308725	0.21258	0.855774	LDL
100002856	glycyrrhetinate	Xenobiotics	Food Component/Plant	0.387583	0.268456	0.944813	0.431613	0.212945	0.855774	LDL
50	spermidine	Amino Acid	Polyamine Metabolism	0.273679	0.206368	0.944813	0.268841	0.214825	0.855774	LDL
100001993	pregnenediol disulfate (C21H34O8S2)*	Lipid	Pregnenolone Steroids	0.53028	0.220806	0.944813	0.535714	0.215217	0.855774	LDL
180	linoleate (18:2n6)	Lipid	Long Chain Polyunsaturated Fatty Acid (n3 and n6)	-0.168223	0.392169	0.944813	-0.241412	0.215865	0.855774	LDL
572	glucose	Carbohydrate	Glycolysis, Gluconeogenesis, and Pyruvate Metabolism	0.153536	0.435369	0.944813	0.241139	0.216402	0.855774	LDL
100010911	butyrylglutamine/isobutyrylglutamine	Amino Acid	Glutamate Metabolism	-0.373725	0.0720242	0.944813	-0.261739	0.216652	0.855774	LDL
100000016	suberate (C8-DC)	Lipid	Fatty Acid, Dicarboxylate	-0.156444	0.426616	0.944813	-0.23977	0.219101	0.85606	LDL
100015962	N,N,N-trimethyl-5-aminovalerate	Amino Acid	Lysine Metabolism	0.117618	0.551123	0.944813	0.23977	0.219101	0.85606	LDL
381	2-aminoadipate	Amino Acid	Lysine Metabolism	-0.248676	0.220575	0.944813	-0.249273	0.219433	0.85606	LDL
100002500	formiminoglutamate	Amino Acid	Histidine Metabolism	-0.180638	0.357642	0.976869	-0.231527	0.235835	0.856596	TC
100004216	pterin	Cofactors and Vitamins	Pterin Metabolism	0.0943128	0.676329	0.989602	0.263693	0.235716	0.856596	TC
1021	5-oxoproline	Amino Acid	Glutathione Metabolism	0.272319	0.160933	0.948354	0.230432	0.23812	0.857149	TC
100002773	solanidine	Xenobiotics	Food Component/Plant	0.229627	0.303952	0.976869	0.262564	0.237802	0.857149	TC
100009237	2-acetamidobutanoate	Xenobiotics	Bacterial/Fungal	0.329974	0.270867	0.976869	0.351648	0.2387	0.857149	TC
100002254	stearoyl ethanolamide	Lipid	Endocannabinoid	-0.29283	0.130473	0.944813	-0.238949	0.220731	0.857593	LDL
330	fumarate	Energy	TCA Cycle	0.231983	0.234888	0.976869	0.229338	0.240419	0.858974	TC
100020696	2-palmitoyl-galactosylglycerol (16:0)*	Lipid	Galactosyl Glycerolipids	0.16504	0.474657	0.976869	0.267532	0.24102	0.858974	TC
100021194	N-carboxymethylalanine	Xenobiotics	Food Component/Plant	0.423627	0.0494549	0.769949	0.250141	0.261546	0.860844	TC
100000914	caffeate	Xenobiotics	Food Component/Plant	0.271093	0.171387	0.948354	0.224664	0.2599	0.860844	TC
100001148	5-hydroxyhexanoate	Lipid	Fatty Acid, Monohydroxy	0.313162	0.136212	0.948354	0.23913	0.260428	0.860844	TC
100004644	1-methylhypoxanthine	Nucleotide	Purine Metabolism, (Hypo)Xanthine/Inosine containing	-0.429073	0.143451	0.948354	-0.335165	0.262943	0.860844	TC
100010877	1,2-dilinolenoyl-galactosylglycerol (18:3/18:3)*	Lipid	Galactosyl Glycerolipids	0.411424	0.183925	0.948354	0.34965	0.265239	0.860844	TC
100001102	dodecanedioate (C12-DC)	Lipid	Fatty Acid, Dicarboxylate	0.264873	0.173151	0.948354	0.21237	0.277941	0.860844	TC
100009393	hexadecatrienoate (16:3n3)	Lipid	Long Chain Polyunsaturated Fatty Acid (n3 and n6)	0.28003	0.175171	0.948354	0.223846	0.282082	0.860844	TC
100002018	5alpha-androstan-3alpha,17beta-diol monosulfate (1)	Lipid	Androgenic Steroids	0.488707	0.181889	0.948354	0.4	0.286105	0.860844	TC
100009063	(3'-5')-cytidylylguanosine	Nucleotide	Dinucleotide	0.330026	0.18106	0.948354	0.263158	0.291392	0.860844	TC
100008981	1-oleoyl-2-linoleoyl-GPC (18:1/18:2)*	Lipid	Phosphatidylcholine (PC)	-0.194076	0.412281	0.976869	-0.273684	0.242966	0.860844	TC
100002568	L-urobilin	Cofactors and Vitamins	Hemoglobin and Porphyrin Metabolism	0.228712	0.251184	0.976869	0.23138	0.245546	0.860844	TC
823	pyruvate	Carbohydrate	Glycolysis, Gluconeogenesis, and Pyruvate Metabolism	0.207529	0.289297	0.976869	0.223864	0.252135	0.860844	TC
100001635	ectoine	Xenobiotics	Chemical	0.335877	0.240368	0.976869	0.327473	0.253071	0.860844	TC
444	ornithine	Amino Acid	Urea cycle; Arginine and Proline Metabolism	0.163251	0.40651	0.976869	0.223317	0.253327	0.860844	TC
100010869	2,3-dihydroxy-2-methylbutyrate	Amino Acid	Leucine, Isoleucine and Valine Metabolism	0.259132	0.256674	0.976869	0.25974	0.255519	0.860844	TC
561	glutamate	Amino Acid	Glutamate Metabolism	0.160763	0.413797	0.976869	0.222222	0.255722	0.860844	TC
73	cytidine 2',3'-cyclic monophosphate	Nucleotide	Pyrimidine Metabolism, Cytidine containing	0.278683	0.406627	0.976869	0.372727	0.258926	0.860844	TC
100021104	pregnenetriol disulfate*	Lipid	Pregnenolone Steroids	0.434317	0.282267	0.976869	0.452381	0.260405	0.860844	TC
100002397	alpha-ketoglutaramate*	Amino Acid	Glutamate Metabolism	0.150151	0.464087	0.976869	0.228718	0.261073	0.860844	TC
250	biliverdin	Cofactors and Vitamins	Hemoglobin and Porphyrin Metabolism	0.131141	0.514397	0.976869	0.223443	0.262567	0.860844	TC
100001739	dihomo-linolenate (20:3n3 or n6)	Lipid	Long Chain Polyunsaturated Fatty Acid (n3 and n6)	-0.177049	0.397195	0.976869	-0.231538	0.265433	0.860844	TC
100015834	lignoceroylcarnitine (C24)*	Lipid	Fatty Acid Metabolism (Acyl Carnitine, Long Chain Saturated)	-0.242691	0.289144	0.976869	-0.254545	0.265488	0.860844	TC
100000086	ciliatine (2-aminoethylphosphonate)	Xenobiotics	Food Component/Plant	0.41657	0.411289	0.976869	0.542857	0.265703	0.860844	TC
100001956	N-methylproline	Amino Acid	Urea cycle; Arginine and Proline Metabolism	0.17781	0.365345	0.976869	0.217296	0.266682	0.860844	TC
100010927	linoleoyl-linolenoyl-glycerol (18:2/18:3) [2]*	Lipid	Diacylglycerol	0.22896	0.241215	0.976869	0.216749	0.267918	0.860844	TC
100021475	N-butyryl-isoleucine	Amino Acid	Leucine, Isoleucine and Valine Metabolism	0.144096	0.501737	0.976869	0.233913	0.271284	0.860844	TC
100003260	carboxyethyl-GABA	Amino Acid	Glutamate Metabolism	-0.150385	0.444962	0.976869	-0.214559	0.272899	0.860844	TC
100001461	1-stearoyl-GPE (18:0)	Lipid	Lysophospholipid	0.168507	0.41058	0.976869	0.223248	0.272961	0.860844	TC
100001359	aconitate [cis or trans]	Energy	TCA Cycle	0.168689	0.489971	0.976869	0.264912	0.273051	0.860844	TC
100001400	1-methylurate	Xenobiotics	Xanthine Metabolism	-0.307108	0.285501	0.976869	-0.314286	0.273805	0.860844	TC
100020723	(3'-5')-adenylyladenosine*	Nucleotide	Dinucleotide	0.223003	0.406433	0.976869	0.291176	0.273887	0.860844	TC
100003397	trimethylamine N-oxide	Lipid	Phospholipid Metabolism	0.162283	0.409337	0.976869	0.214012	0.274154	0.860844	TC
2050	eicosapentaenoate (EPA; 20:5n3)	Lipid	Long Chain Polyunsaturated Fatty Acid (n3 and n6)	-0.230467	0.278609	0.976869	-0.230435	0.278678	0.860844	TC
100001257	N-acetylasparagine	Amino Acid	Alanine and Aspartate Metabolism	-0.221343	0.446966	0.976869	-0.30989	0.280933	0.860844	TC
100001007	ribonate	Carbohydrate	Pentose Metabolism	0.120458	0.541483	0.976869	0.210728	0.28176	0.860844	TC
913	maltose	Carbohydrate	Glycogen Metabolism	0.237685	0.358296	0.976869	0.276961	0.281843	0.860844	TC
100001042	erythrose	Xenobiotics	Food Component/Plant	0.303257	0.364652	0.976869	0.354545	0.284693	0.860844	TC
100004322	2-aminophenol sulfate	Xenobiotics	Food Component/Plant	0.592647	0.292272	0.976869	0.6	0.284757	0.860844	TC
100009204	1,2-dipalmitoyl-GPE (16:0/16:0)*	Lipid	Phosphatidylethanolamine (PE)	-0.442908	0.455094	0.976869	-0.6	0.284757	0.860844	TC
418	methylmalonate (MMA)	Lipid	Fatty Acid Metabolism (also BCAA Metabolism)	0.130114	0.517723	0.976869	0.213065	0.285953	0.860844	TC
100015609	N-palmitoyl-sphingadienine (d18:2/16:0)*	Lipid	Ceramides	-0.363583	0.245339	0.976869	-0.335664	0.286123	0.860844	TC
212	5-methylthioadenosine (MTA)	Amino Acid	Polyamine Metabolism	0.285075	0.323198	0.976869	0.305495	0.28817	0.860844	TC
100000862	4-hydroxybenzoate	Xenobiotics	Benzoate Metabolism	0.247989	0.337201	0.976869	0.272059	0.290796	0.860844	TC
100003598	tyrosylglycine	Peptide	Dipeptide	0.171956	0.444157	0.976869	0.23546	0.291488	0.860844	TC
100001018	p-cresol	Xenobiotics	Benzoate Metabolism	-0.137748	0.573872	0.980887	-0.268421	0.26651	0.860844	TC
100015962	N,N,N-trimethyl-5-aminovalerate	Amino Acid	Lysine Metabolism	0.10499	0.594933	0.980887	0.212917	0.276675	0.860844	TC
1087	erucate (22:1n9)	Lipid	Long Chain Monounsaturated Fatty Acid	-0.104454	0.596828	0.980887	-0.21237	0.277941	0.860844	TC
100002094	gamma-CEHC	Cofactors and Vitamins	Tocopherol Metabolism	-0.232723	0.579144	0.980887	-0.428571	0.289403	0.860844	TC
100002989	oleoyl-linoleoyl-glycerol (18:1/18:2) [1]	Lipid	Diacylglycerol	-0.0904554	0.667191	0.989602	-0.227692	0.273677	0.860844	TC
1090	bilirubin (Z,Z)	Cofactors and Vitamins	Hemoglobin and Porphyrin Metabolism	0.0707872	0.731128	0.989602	0.21641	0.2883	0.860844	TC
1506	N-linoleoylglycine	Lipid	Fatty Acid Metabolism (Acyl Glycine)	-0.18912	0.653764	0.989602	-0.428571	0.289403	0.860844	TC
100005972	alpha-CEHC sulfate	Cofactors and Vitamins	Tocopherol Metabolism	-0.133223	0.753147	0.989602	-0.428571	0.289403	0.860844	TC
100001232	5-dodecenoate (12:1n7)	Lipid	Medium Chain Fatty Acid	0.0405534	0.837659	0.990581	0.22058	0.259342	0.860844	TC
100000458	homoserine	Amino Acid	Glycine, Serine and Threonine Metabolism	0.0538399	0.785543	0.990581	0.210181	0.283041	0.860844	TC
100021666	branched-chain, straight-chain, or cyclopropyl 10:1 fatty acid (1)*	Partially Characterized Molecules	Partially Characterized Molecules	-0.0586337	0.925388	0.990581	-0.6	0.284757	0.860844	TC
1123	chenodeoxycholate	Lipid	Primary Bile Acid Metabolism	-0.535608	0.215326	0.976869	-0.464286	0.293934	0.865371	TC
100001397	1,3,7-trimethylurate	Xenobiotics	Xanthine Metabolism	0.0670748	0.734514	0.944813	0.237307	0.224015	0.8654	LDL
100005946	2-keto-3-deoxy-gluconate	Xenobiotics	Food Component/Plant	0.203488	0.298998	0.944813	0.237033	0.224566	0.8654	LDL
100021475	N-butyryl-isoleucine	Amino Acid	Leucine, Isoleucine and Valine Metabolism	0.187496	0.380312	0.944813	0.256578	0.226181	0.868096	LDL
100010911	butyrylglutamine/isobutyrylglutamine	Amino Acid	Glutamate Metabolism	-0.337096	0.107219	0.948354	-0.221739	0.297718	0.8711	TC
100010918	oleoyl-oleoyl-glycerol (18:1/18:1) [1]*	Lipid	Diacylglycerol	-0.0956854	0.767375	0.990578	-0.328671	0.296904	0.8711	TC
100003678	prolylproline	Peptide	Dipeptide	-0.263354	0.17572	0.948354	-0.203612	0.298697	0.871277	TC
100005818	N-acetyl-S-allyl-cysteine	Xenobiotics	Food Component/Plant	0.184282	0.411663	0.944813	0.267156	0.229392	0.872004	LDL
100019892	2-hydroxyarachidate*	Lipid	Fatty Acid, Monohydroxy	-0.234031	0.230664	0.944813	-0.234296	0.230122	0.872004	LDL
1216	N-acetyl-beta-glucosaminylamine	Carbohydrate	Aminosugar Metabolism	-0.294071	0.128776	0.944813	-0.231285	0.236339	0.872004	LDL
100001274	N-acetylthreonine	Amino Acid	Glycine, Serine and Threonine Metabolism	0.101818	0.643884	0.944813	0.25698	0.236526	0.872004	LDL
100015637	2-hydroxybehenate	Lipid	Fatty Acid, Monohydroxy	-0.171107	0.383983	0.944813	-0.231011	0.236909	0.872004	LDL
100001143	3-hydroxysuberate	Lipid	Fatty Acid, Monohydroxy	-0.0998837	0.650226	0.944813	-0.255004	0.240277	0.872004	LDL
100020371	N,N-dimethylalanine	Amino Acid	Alanine and Aspartate Metabolism	0.220017	0.260591	0.944813	0.229369	0.240353	0.872004	LDL
100001335	eicosenoate (20:1)	Lipid	Long Chain Monounsaturated Fatty Acid	-0.234458	0.239143	0.944813	-0.233552	0.241017	0.872004	LDL
100004499	6-oxopiperidine-2-carboxylate	Amino Acid	Lysine Metabolism	-0.329233	0.125024	0.944813	-0.253953	0.242288	0.872004	LDL
212	5-methylthioadenosine (MTA)	Amino Acid	Polyamine Metabolism	0.243104	0.402323	0.944813	0.334434	0.242521	0.872004	LDL
100002284	2S,3R-dihydroxybutyrate	Lipid	Fatty Acid, Dihydroxy	0.167708	0.455661	0.944813	0.258684	0.245061	0.872004	LDL
100001890	alanylleucine	Peptide	Dipeptide	-0.194722	0.320737	0.944813	-0.226632	0.246165	0.872004	LDL
100001287	epiandrosterone sulfate	Lipid	Androgenic Steroids	0.44749	0.10862	0.944813	0.331868	0.246377	0.872004	LDL
194	N-formylmethionine	Amino Acid	Methionine, Cysteine, SAM and Taurine Metabolism	0.117498	0.551534	0.944813	0.226358	0.246751	0.872004	LDL
565	tryptophan	Amino Acid	Tryptophan Metabolism	-0.272325	0.160923	0.944813	-0.223895	0.252069	0.872004	LDL
100000458	homoserine	Amino Acid	Glycine, Serine and Threonine Metabolism	0.0763331	0.699448	0.944813	0.223895	0.252069	0.872004	LDL
100001632	formononetin	Xenobiotics	Food Component/Plant	0.604447	0.150536	0.944813	0.5	0.25317	0.872004	LDL
100002199	tridecenedioate (C13:1-DC)*	Lipid	Fatty Acid, Dicarboxylate	0.403879	0.17111	0.944813	0.340659	0.254706	0.872004	LDL
100000841	oxalate (ethanedioate)	Cofactors and Vitamins	Ascorbate and Aldarate Metabolism	0.336639	0.079834	0.944813	0.222526	0.255055	0.872004	LDL
100002544	4-hydroxyglutamate	Amino Acid	Glutamate Metabolism	-0.398354	0.19964	0.944813	-0.356643	0.255138	0.872004	LDL
100001219	daidzein	Xenobiotics	Food Component/Plant	0.22906	0.430863	0.944813	0.325633	0.255905	0.872004	LDL
100006369	N-carbamoylalanine	Amino Acid	Alanine and Aspartate Metabolism	-0.294388	0.251388	0.944813	-0.291667	0.256003	0.872004	LDL
100000275	maltotetraose	Carbohydrate	Glycogen Metabolism	0.377004	0.253065	0.944813	0.372727	0.258926	0.872004	LDL
75	uridine-2',3'-cyclic monophosphate	Nucleotide	Pyrimidine Metabolism, Uracil containing	0.153759	0.483639	0.944813	0.245059	0.259736	0.872004	LDL
100006005	5alpha-androstan-3alpha,17beta-diol monosulfate (2)	Lipid	Androgenic Steroids	-0.223702	0.442013	0.944813	-0.323077	0.259874	0.872004	LDL
100003542	histidylalanine	Peptide	Dipeptide	-0.611711	0.0601916	0.944813	-0.393939	0.259998	0.872004	LDL
100009062	(3'-5')-adenylylcytidine	Nucleotide	Dinucleotide	0.366771	0.371488	0.944813	0.452381	0.260405	0.872004	LDL
240	3-(4-hydroxyphenyl)lactate	Amino Acid	Tyrosine Metabolism	0.295216	0.151952	0.944813	0.233506	0.261278	0.872004	LDL
100000285	N-alpha-acetylornithine	Amino Acid	Urea cycle; Arginine and Proline Metabolism	-0.126076	0.522643	0.944813	-0.219242	0.262317	0.872004	LDL
100000299	xanthosine	Nucleotide	Purine Metabolism, (Hypo)Xanthine/Inosine containing	0.237099	0.23374	0.944813	0.223477	0.262493	0.872004	LDL
1207	phenethylamine	Amino Acid	Phenylalanine Metabolism	0.0749132	0.721923	0.944813	0.232737	0.262897	0.872004	LDL
1136	valerate (5:0)	Lipid	Short Chain Fatty Acid	0.199462	0.308866	0.944813	0.218968	0.262928	0.872004	LDL
100001992	androstenediol (3beta,17beta) disulfate (1)	Lipid	Androgenic Steroids	0.138217	0.623256	0.944813	0.307143	0.265473	0.872004	LDL
100002009	5alpha-pregnan-3beta,20beta-diol monosulfate (1)	Lipid	Progestin Steroids	0.487218	0.327001	0.944813	0.542857	0.265703	0.872004	LDL
100002129	pregnenolone sulfate	Lipid	Pregnenolone Steroids	0.507366	0.304254	0.944813	0.542857	0.265703	0.872004	LDL
100020850	tetrahydrocortisol disulfate	Lipid	Corticosteroids	0.535242	0.273806	0.944813	0.542857	0.265703	0.872004	LDL
213	N6-methyladenosine	Nucleotide	Purine Metabolism, Adenine containing	0.132202	0.53803	0.944813	0.235703	0.267526	0.872004	LDL
100010834	3-methylglutarate/2-methylglutarate	Lipid	Fatty Acid, Dicarboxylate	-0.180876	0.356998	0.944813	-0.216778	0.267851	0.872004	LDL
100002013	5alpha-pregnan-3beta,20alpha-diol monosulfate (1)	Lipid	Progestin Steroids	-0.176395	0.432303	0.944813	-0.245693	0.270402	0.872004	LDL
100000486	N6-formyllysine	Amino Acid	Lysine Metabolism	-0.31457	0.125643	0.944813	-0.22889	0.271092	0.872004	LDL
100002458	3-methylglutaconate	Amino Acid	Leucine, Isoleucine and Valine Metabolism	-0.135641	0.517968	0.944813	-0.22889	0.271092	0.872004	LDL
100003686	N-palmitoylglycine	Lipid	Fatty Acid Metabolism (Acyl Glycine)	-0.30431	0.312069	0.944813	-0.32967	0.271335	0.872004	LDL
100010941	linoleoyl-linoleoyl-glycerol (18:2/18:2) [1]*	Lipid	Diacylglycerol	-0.215022	0.480513	0.944813	-0.32967	0.271335	0.872004	LDL
100001739	dihomo-linolenate (20:3n3 or n6)	Lipid	Long Chain Polyunsaturated Fatty Acid (n3 and n6)	-0.18082	0.387053	0.944813	-0.228121	0.272751	0.872004	LDL
913	maltose	Carbohydrate	Glycogen Metabolism	0.231123	0.372109	0.944813	0.282036	0.272753	0.872004	LDL
875	p-aminobenzoate (PABA)	Xenobiotics	Benzoate Metabolism	-0.196525	0.519895	0.944813	-0.327373	0.27489	0.872004	LDL
100004575	N2,N5-diacetylornithine	Amino Acid	Urea cycle; Arginine and Proline Metabolism	0.184427	0.5661	0.944813	0.342657	0.275567	0.872004	LDL
275	creatinine	Amino Acid	Creatine Metabolism	-0.218907	0.282638	0.944813	-0.220551	0.278949	0.872004	LDL
1133	tyramine	Amino Acid	Tyrosine Metabolism	-0.248793	0.220353	0.944813	-0.220209	0.279713	0.872004	LDL
100000007	carnitine	Lipid	Carnitine Metabolism	-0.212659	0.277272	0.944813	-0.209936	0.283615	0.872004	LDL
100020378	2-hydroxysebacate	Lipid	Fatty Acid, Dicarboxylate	-0.253042	0.193879	0.944813	-0.209936	0.283615	0.872004	LDL
100006007	5alpha-androstan-3beta,17alpha-diol monosulfate (2)	Lipid	Androgenic Steroids	0.303319	0.619808	0.944813	0.6	0.284757	0.872004	LDL
100009204	1,2-dipalmitoyl-GPE (16:0/16:0)*	Lipid	Phosphatidylethanolamine (PE)	-0.349638	0.564071	0.944813	-0.6	0.284757	0.872004	LDL
302	deoxycholate	Lipid	Secondary Bile Acid Metabolism	-0.33402	0.0953747	0.944813	-0.217778	0.28519	0.872004	LDL
136	cholate	Lipid	Primary Bile Acid Metabolism	-0.267174	0.19667	0.944813	-0.221966	0.28625	0.872004	LDL
100015642	N-(2-hydroxypalmitoyl)-sphingosine (d18:1/16:0(2OH))	Lipid	Ceramides	-0.155836	0.437636	0.944813	-0.212181	0.288002	0.872004	LDL
100000263	imidazole lactate	Amino Acid	Histidine Metabolism	0.113387	0.565636	0.944813	0.20802	0.288133	0.872004	LDL
100000784	theanine	Xenobiotics	Food Component/Plant	-0.181359	0.553205	0.944813	-0.318681	0.288583	0.872004	LDL
100000706	alpha-hydroxyisocaproate	Amino Acid	Leucine, Isoleucine and Valine Metabolism	0.466607	0.243806	0.944813	0.428571	0.289403	0.872004	LDL
1022	picolinate	Amino Acid	Tryptophan Metabolism	-0.50538	0.05464	0.944813	-0.292857	0.289472	0.872004	LDL
100001034	indoleacetate	Amino Acid	Tryptophan Metabolism	-0.201626	0.323287	0.944813	-0.215421	0.290563	0.872004	LDL
1235	gamma-glutamylhistidine	Peptide	Gamma-glutamyl Amino Acid	-0.0922304	0.734067	0.944813	-0.281089	0.291606	0.872004	LDL
100002227	4-cholesten-3-one	Lipid	Sterol	0.134166	0.496086	0.944813	0.206377	0.292041	0.872004	LDL
100019894	2-hydroxylignocerate*	Lipid	Fatty Acid, Monohydroxy	-0.18006	0.389085	0.944813	-0.219273	0.292286	0.872004	LDL
100003493	tyrosol	Amino Acid	Tyrosine Metabolism	0.234856	0.280724	0.944813	0.229306	0.292575	0.872004	LDL
100002398	piperidine	Xenobiotics	Food Component/Plant	0.227694	0.243899	0.944813	0.206104	0.292696	0.872004	LDL
100021476	N-succinyl-leucine	Amino Acid	Leucine, Isoleucine and Valine Metabolism	-0.406201	0.277996	0.944813	-0.393309	0.29499	0.872004	LDL
100001635	ectoine	Xenobiotics	Chemical	0.40096	0.155366	0.944813	0.301099	0.295514	0.872004	LDL
405	lithocholate	Lipid	Secondary Bile Acid Metabolism	-0.174752	0.373782	0.944813	-0.204461	0.296643	0.872004	LDL
100001254	N-acetyltryptophan	Amino Acid	Tryptophan Metabolism	0.310782	0.301363	0.944813	0.313187	0.297438	0.872004	LDL
100001396	7-methylxanthine	Xenobiotics	Xanthine Metabolism	0.226563	0.50291	0.944813	0.345455	0.298089	0.872004	LDL
100006435	N-acetylglucosamine/N-acetylgalactosamine	Carbohydrate	Aminosugar Metabolism	0.146799	0.456014	0.944813	0.203093	0.299958	0.872004	LDL
100003668	prolylalanine	Peptide	Dipeptide	-0.26856	0.215323	0.944813	-0.225296	0.301326	0.872004	LDL
100001983	sitostanol	Xenobiotics	Food Component/Plant	0.176405	0.498231	0.944813	0.266094	0.301917	0.872004	LDL
395	lanosterol	Lipid	Sterol	0.0925715	0.69789	0.944813	0.242948	0.302022	0.872004	LDL
100008932	phenylacetyltaurine	Peptide	Acetylated Peptides	-0.266035	0.357924	0.944813	-0.29703	0.302409	0.872004	LDL
100015831	linolenoylcarnitine (C18:3)*	Lipid	Fatty Acid Metabolism (Acyl Carnitine, Polyunsaturated)	-0.26753	0.228715	0.944813	-0.229814	0.303548	0.872004	LDL
250	biliverdin	Cofactors and Vitamins	Hemoglobin and Porphyrin Metabolism	0.122134	0.543934	0.944813	0.205465	0.303889	0.872004	LDL
568	pyridoxamine	Cofactors and Vitamins	Vitamin B6 Metabolism	0.187821	0.338519	0.944813	0.201451	0.303967	0.872004	LDL
100001956	N-methylproline	Amino Acid	Urea cycle; Arginine and Proline Metabolism	0.192487	0.326432	0.944813	0.200903	0.305311	0.872004	LDL
100006123	N-acetylhistamine	Amino Acid	Histidine Metabolism	-0.197012	0.379516	0.944813	-0.228184	0.307084	0.872004	LDL
100002989	oleoyl-linoleoyl-glycerol (18:1/18:2) [1]	Lipid	Diacylglycerol	-0.0877187	0.676719	0.944813	-0.211964	0.309069	0.872004	LDL
100002606	N-carbamoylsarcosine	Amino Acid	Creatine Metabolism	0.194221	0.411925	0.944813	0.239098	0.309986	0.872004	LDL
100003609	tryptophylglycine	Peptide	Dipeptide	-0.257969	0.258891	0.944813	-0.232543	0.310398	0.872004	LDL
100020715	heptadecatrienoate (17:3)*	Lipid	Long Chain Polyunsaturated Fatty Acid (n3 and n6)	0.36971	0.119252	0.944813	0.245614	0.310793	0.872004	LDL
1748	dopamine	Amino Acid	Tyrosine Metabolism	0.155915	0.456735	0.944813	0.211194	0.310869	0.872004	LDL
1135	ursodeoxycholate	Lipid	Secondary Bile Acid Metabolism	-0.204508	0.361275	0.944813	-0.226426	0.310928	0.872004	LDL
825	uracil	Nucleotide	Pyrimidine Metabolism, Uracil containing	0.18268	0.352143	0.944813	0.19844	0.311402	0.872004	LDL
100001542	ferulate	Xenobiotics	Food Component/Plant	0.210082	0.283272	0.944813	0.19844	0.311402	0.872004	LDL
100002459	3-hydroxyvalerate	Lipid	Fatty Acid, Monohydroxy	-0.050227	0.819965	0.962356	-0.224364	0.303385	0.872004	LDL
100000283	N-acetylmuramate	Carbohydrate	Aminosugar Metabolism	0.0229053	0.907896	0.981398	0.218694	0.26354	0.872004	LDL
100015835	cerotoylcarnitine (C26)*	Lipid	Fatty Acid Metabolism (Acyl Carnitine, Long Chain Saturated)	-0.0367622	0.914545	0.98352	-0.336364	0.311824	0.872004	LDL
100015731	N-palmitoyl-heptadecasphingosine (d17:1/16:0)*	Lipid	Ceramides	-0.308166	0.174123	0.948354	-0.235065	0.30503	0.87442	TC
100001456	7-methylguanine	Nucleotide	Purine Metabolism, Guanine containing	0.301632	0.118783	0.948354	0.200328	0.306725	0.87442	TC
100019960	2-hydroxyheptanoate*	Lipid	Fatty Acid, Monohydroxy	0.18439	0.388396	0.976869	0.22	0.30162	0.87442	TC
100003265	2-oxo-1-pyrrolidinepropionate	Xenobiotics	Chemical	0.323917	0.22099	0.976869	0.273529	0.305323	0.87442	TC
100000708	isovalerate (i5:0)	Amino Acid	Leucine, Isoleucine and Valine Metabolism	0.201529	0.303774	0.976869	0.200876	0.305378	0.87442	TC
100009064	(3'-5')-guanylylcytidine	Nucleotide	Dinucleotide	-0.371254	0.211689	0.976869	-0.307692	0.306447	0.87442	TC
93	alpha-ketoglutarate	Energy	TCA Cycle	0.246903	0.214396	0.976869	0.203907	0.30765	0.87442	TC
100021471	N-isobutyryl-phenylalanine	Amino Acid	Phenylalanine Metabolism	-0.208754	0.514972	0.976869	-0.321678	0.30791	0.87442	TC
100002227	4-cholesten-3-one	Lipid	Sterol	0.186367	0.342339	0.976869	0.199781	0.308076	0.87442	TC
100000873	galacturonate	Xenobiotics	Food Component/Plant	0.35651	0.311925	0.976869	0.357576	0.310376	0.878318	TC
100002199	tridecenedioate (C13:1-DC)*	Lipid	Fatty Acid, Dicarboxylate	0.511268	0.0741443	0.893103	0.302198	0.315608	0.87999	TC
100000039	methionine sulfoxide	Amino Acid	Methionine, Cysteine, SAM and Taurine Metabolism	-0.121551	0.537793	0.976869	-0.198139	0.312152	0.87999	TC
100010939	palmitoyl-linolenoyl-glycerol (16:0/18:3) [2]*	Lipid	Diacylglycerol	0.208308	0.392111	0.976869	0.24386	0.314372	0.87999	TC
100001121	pyridoxate	Cofactors and Vitamins	Vitamin B6 Metabolism	-0.117193	0.552575	0.976869	-0.197044	0.314887	0.87999	TC
100019968	lyxonate	Carbohydrate	Pentose Metabolism	0.137652	0.484856	0.976869	0.197044	0.314887	0.87999	TC
563	glutamine	Amino Acid	Glutamate Metabolism	-0.264881	0.173136	0.944813	-0.196524	0.316192	0.881619	LDL
100001621	glycerophosphoinositol*	Lipid	Phospholipid Metabolism	0.25073	0.198121	0.973152	0.19595	0.317637	0.881715	TC
275	creatinine	Amino Acid	Creatine Metabolism	-0.178992	0.381632	0.976869	-0.203419	0.318912	0.881715	TC
100021568	25-hydroxycholesterol sulfate	Lipid	Sterol	0.103856	0.598941	0.980887	0.195402	0.319017	0.881715	TC
1539	1-palmitoyl-2-oleoyl-GPC (16:0/18:1)	Lipid	Phosphatidylcholine (PC)	-0.218996	0.262865	0.944813	-0.195703	0.318259	0.882051	LDL
100001851	N-acetylserine	Amino Acid	Glycine, Serine and Threonine Metabolism	-0.319151	0.0978419	0.944813	-0.195429	0.31895	0.882051	LDL
100010918	oleoyl-oleoyl-glycerol (18:1/18:1) [1]*	Lipid	Diacylglycerol	-0.129901	0.687405	0.944813	-0.314685	0.319139	0.882051	LDL
568	pyridoxamine	Cofactors and Vitamins	Vitamin B6 Metabolism	0.217294	0.266687	0.976869	0.19376	0.323181	0.882275	TC
100000707	maleate	Lipid	Fatty Acid, Dicarboxylate	0.149131	0.448811	0.976869	0.19376	0.323181	0.882275	TC
100001870	1-palmitoyl-2-linoleoyl-GPE (16:0/18:2)	Lipid	Phosphatidylethanolamine (PE)	-0.174279	0.437933	0.976869	-0.218521	0.328569	0.882275	TC
100003495	pinoresinol	Xenobiotics	Food Component/Plant	-0.469328	0.347697	0.976869	-0.485714	0.328723	0.882275	TC
100001851	N-acetylserine	Amino Acid	Glycine, Serine and Threonine Metabolism	-0.204709	0.296046	0.976869	-0.191571	0.328784	0.882275	TC
100000455	itaconate	Energy	TCA Cycle	0.222553	0.33222	0.976869	0.223377	0.330388	0.882275	TC
100001197	10-undecenoate (11:1n1)	Lipid	Medium Chain Fatty Acid	0.134627	0.560686	0.976869	0.223377	0.330388	0.882275	TC
100003686	N-palmitoylglycine	Lipid	Fatty Acid Metabolism (Acyl Glycine)	-0.160217	0.601069	0.980887	-0.296703	0.324922	0.882275	TC
100019892	2-hydroxyarachidate*	Lipid	Fatty Acid, Monohydroxy	-0.099879	0.61308	0.981757	-0.191571	0.328784	0.882275	TC
100001067	dehydrolithocholate	Lipid	Secondary Bile Acid Metabolism	-0.0647612	0.743362	0.989602	-0.19376	0.323181	0.882275	TC
100006124	N2,N6-diacetyllysine	Amino Acid	Lysine Metabolism	0.099549	0.651325	0.989602	0.213439	0.328142	0.882275	TC
100021873	1-deoxysphinganine (m18:0)	Lipid	Sphingolipid Synthesis	-0.0536378	0.78633	0.990581	-0.193213	0.324576	0.882275	TC
100021196	carboxymethylproline	Amino Acid	Urea cycle; Arginine and Proline Metabolism	0.23057	0.237831	0.976869	0.190476	0.331608	0.883046	TC
100001216	delta-tocopherol	Cofactors and Vitamins	Tocopherol Metabolism	0.203949	0.328141	0.944813	0.206963	0.320887	0.884304	LDL
1526	1-palmitoyl-2-oleoyl-GPE (16:0/18:1)	Lipid	Phosphatidylethanolamine (PE)	0.237391	0.300129	0.944813	0.226047	0.324486	0.885468	LDL
432	nicotinamide	Cofactors and Vitamins	Nicotinate and Nicotinamide Metabolism	-0.265327	0.172387	0.944813	-0.192966	0.325208	0.885468	LDL
567	nicotinate	Cofactors and Vitamins	Nicotinate and Nicotinamide Metabolism	0.18299	0.35131	0.944813	0.192966	0.325208	0.885468	LDL
100000054	5-hydroxylysine	Amino Acid	Lysine Metabolism	0.328612	0.323801	0.944813	0.327273	0.325895	0.885468	LDL
100008929	2-methylcitrate/homocitrate	Energy	TCA Cycle	0.109898	0.577729	0.944813	0.191871	0.328013	0.885468	LDL
100001150	propionylglycine	Lipid	Fatty Acid Metabolism (also BCAA Metabolism)	0.405356	0.279094	0.944813	0.366667	0.33174	0.885468	LDL
100001006	N-acetylglycine	Amino Acid	Glycine, Serine and Threonine Metabolism	0.176499	0.420469	0.944813	0.211515	0.332624	0.885468	LDL
100000436	glycodeoxycholate	Lipid	Secondary Bile Acid Metabolism	0.192634	0.402827	0.944813	0.222078	0.333281	0.885468	LDL
100015845	docosahexaenoylcarnitine (C22:6)*	Lipid	Fatty Acid Metabolism (Acyl Carnitine, Polyunsaturated)	0.314632	0.295094	0.944813	0.29161	0.33369	0.885468	LDL
100000870	saccharin	Xenobiotics	Food Component/Plant	-0.266332	0.357367	0.944813	-0.279121	0.333845	0.885468	LDL
100010869	2,3-dihydroxy-2-methylbutyrate	Amino Acid	Leucine, Isoleucine and Valine Metabolism	0.236495	0.302011	0.944813	0.2215	0.334571	0.885468	LDL
100021065	lactobacillic acid	Xenobiotics	Bacterial/Fungal	0.0734183	0.721518	0.944813	0.196273	0.336567	0.885468	LDL
100010934	diacylglycerol (14:0/18:1, 16:0/16:1) [1]*	Lipid	Diacylglycerol	0.567044	0.184338	0.944813	0.428571	0.337368	0.885468	LDL
100021372	2-hydroxy-4-(methylthio)butanoic acid	Amino Acid	Methionine, Cysteine, SAM and Taurine Metabolism	0.108684	0.60506	0.944813	0.2	0.337793	0.885468	LDL
100009325	3-carboxyadipate	Lipid	Fatty Acid, Dicarboxylate	-0.147474	0.462909	0.944813	-0.191726	0.338049	0.885468	LDL
100006124	N2,N6-diacetyllysine	Amino Acid	Lysine Metabolism	0.0787345	0.721021	0.944813	0.209044	0.338434	0.885468	LDL
100010893	1-palmitoyl-2-linoleoyl-galactosylglycerol (16:0/18:2)*	Lipid	Galactosyl Glycerolipids	0.315357	0.252237	0.944813	0.264286	0.341174	0.885468	LDL
100001816	deoxymugineic acid	Xenobiotics	Food Component/Plant	-0.125843	0.557924	0.944813	-0.202653	0.342266	0.885468	LDL
100021873	1-deoxysphinganine (m18:0)	Lipid	Sphingolipid Synthesis	-0.14591	0.458779	0.944813	-0.186123	0.342982	0.885468	LDL
100001132	pyroglutamylvaline	Peptide	Modified Peptides	-0.179513	0.360695	0.944813	-0.185849	0.343705	0.885468	LDL
1239	2-hydroxystearate	Lipid	Fatty Acid, Monohydroxy	-0.194315	0.386206	0.944813	-0.211745	0.344157	0.885468	LDL
407	lysine	Amino Acid	Lysine Metabolism	0.185714	0.344064	0.944813	0.185575	0.344429	0.885468	LDL
100001810	dimethylarginine (SDMA + ADMA)	Amino Acid	Urea cycle; Arginine and Proline Metabolism	-0.320565	0.126703	0.944813	-0.201348	0.345449	0.885468	LDL
100000463	indolelactate	Amino Acid	Tryptophan Metabolism	0.129175	0.512389	0.944813	0.185028	0.345879	0.885468	LDL
100001977	beta-cryptoxanthin	Cofactors and Vitamins	Vitamin A Metabolism	0.133645	0.524202	0.944813	0.196576	0.346298	0.885468	LDL
100021071	vitamin D3 sulfate	Cofactors and Vitamins	Vitamin D Metabolism	-0.324324	0.17552	0.944813	-0.22807	0.347678	0.885468	LDL
100020597	9,10-DiHOME sulfate	Lipid	Fatty Acid, Dihydroxy	-0.126605	0.584474	0.944813	-0.214355	0.350789	0.885468	LDL
100005373	fructosyllysine	Amino Acid	Lysine Metabolism	0.101115	0.60867	0.944813	0.183112	0.350985	0.885468	LDL
1869	2-hydroxyhippurate (salicylurate)	Xenobiotics	Benzoate Metabolism	-0.581636	0.0605201	0.944813	-0.309091	0.355028	0.885468	LDL
100002514	hydantoin-5-propionate	Amino Acid	Histidine Metabolism	0.192747	0.570161	0.944813	0.309091	0.355028	0.885468	LDL
100020840	linolenoyl ethanolamide	Lipid	Endocannabinoid	0.31411	0.410406	0.944813	0.35	0.35582	0.885468	LDL
100001950	bilirubin (E,E)*	Cofactors and Vitamins	Hemoglobin and Porphyrin Metabolism	0.13867	0.548866	0.944813	0.211688	0.356958	0.885468	LDL
1052	glycerate	Carbohydrate	Glycolysis, Gluconeogenesis, and Pyruvate Metabolism	0.0625785	0.751739	0.944813	0.180375	0.358355	0.885468	LDL
331	gamma-glutamylglutamate	Peptide	Gamma-glutamyl Amino Acid	-0.198289	0.311779	0.944813	-0.180101	0.359097	0.885468	LDL
100000964	alpha-glutamylglutamate	Peptide	Dipeptide	-0.125177	0.525639	0.944813	-0.180101	0.359097	0.885468	LDL
100010878	1-linoleoyl-2-linolenoyl-galactosylglycerol (18:2/18:3)*	Lipid	Galactosyl Glycerolipids	0.175573	0.585198	0.944813	0.290718	0.359293	0.885468	LDL
100022041	N,N-dimethyl-pro-pro	Peptide	Modified Peptides	0.186178	0.445376	0.944813	0.222027	0.360944	0.885468	LDL
100015731	N-palmitoyl-heptadecasphingosine (d17:1/16:0)*	Lipid	Ceramides	-0.272277	0.232458	0.944813	-0.209808	0.361344	0.885468	LDL
100002125	11-ketoetiocholanolone sulfate	Lipid	Androgenic Steroids	0.126927	0.652155	0.944813	0.253571	0.361816	0.885468	LDL
1113	4-acetamidobutanoate	Amino Acid	Polyamine Metabolism	-0.247372	0.213498	0.944813	-0.182568	0.362057	0.885468	LDL
922	N-stearoyl-sphinganine (d18:0/18:0)*	Lipid	Dihydroceramides	-0.188299	0.367379	0.944813	-0.188882	0.365868	0.885468	LDL
1114	3-aminoisobutyrate	Nucleotide	Pyrimidine Metabolism, Thymine containing	0.174166	0.415681	0.944813	0.193085	0.36601	0.885468	LDL
100000125	2'-deoxycytidine	Nucleotide	Pyrimidine Metabolism, Cytidine containing	0.210361	0.282619	0.944813	0.177364	0.366567	0.885468	LDL
1025	pipecolate	Amino Acid	Lysine Metabolism	0.240474	0.226954	0.944813	0.180736	0.366975	0.885468	LDL
100009060	(3'-5')-adenylyluridine	Nucleotide	Dinucleotide	0.339443	0.168181	0.944813	0.226006	0.367178	0.885468	LDL
100021474	N-butyryl-leucine	Amino Acid	Leucine, Isoleucine and Valine Metabolism	0.124076	0.529314	0.944813	0.176269	0.369581	0.885468	LDL
100001102	dodecanedioate (C12-DC)	Lipid	Fatty Acid, Dicarboxylate	0.151597	0.441258	0.944813	0.175996	0.370336	0.885468	LDL
100001919	syringic acid	Xenobiotics	Food Component/Plant	0.198677	0.429335	0.944813	0.224058	0.371433	0.885468	LDL
100001277	10-nonadecenoate (19:1n9)	Lipid	Long Chain Monounsaturated Fatty Acid	0.219152	0.382267	0.944813	0.223942	0.371686	0.885468	LDL
100001655	1-palmitoyl-GPI (16:0)	Lipid	Lysophospholipid	-0.233328	0.402637	0.944813	-0.248436	0.371948	0.885468	LDL
100001411	beta-guanidinopropanoate	Xenobiotics	Food Component/Plant	0.212983	0.341277	0.944813	0.199379	0.373702	0.885468	LDL
100021256	3,5-dihydroxyphenylpropionate	Xenobiotics	Benzoate Metabolism	-0.261993	0.326973	0.944813	-0.238235	0.374254	0.885468	LDL
100002102	N-acetyl-beta-alanine	Nucleotide	Pyrimidine Metabolism, Uracil containing	-0.191116	0.462469	0.944813	-0.229307	0.375982	0.885468	LDL
100001208	1-methyl-4-imidazoleacetate	Amino Acid	Histidine Metabolism	0.100553	0.682109	0.944813	0.215007	0.376712	0.885468	LDL
291	glucose 6-phosphate	Carbohydrate	Glycolysis, Gluconeogenesis, and Pyruvate Metabolism	-0.279706	0.378594	0.944813	-0.280211	0.377698	0.885468	LDL
100001429	1-margaroylglycerol (17:0)	Lipid	Monoacylglycerol	0.250845	0.431632	0.944813	0.280211	0.377698	0.885468	LDL
100002126	16alpha-hydroxy DHEA 3-sulfate	Lipid	Androgenic Steroids	0.167976	0.601784	0.944813	0.27972	0.378569	0.885468	LDL
1004	xanthine	Nucleotide	Purine Metabolism, (Hypo)Xanthine/Inosine containing	0.102743	0.617464	0.944813	0.179176	0.381135	0.885468	LDL
100004290	o-tyrosine	Amino Acid	Tyrosine Metabolism	-0.728783	0.0631743	0.944813	-0.392857	0.383317	0.885468	LDL
100000800	indoleacrylate	Amino Acid	Tryptophan Metabolism	0.249716	0.486555	0.944813	0.309091	0.384841	0.885468	LDL
100006056	N-formylphenylalanine	Amino Acid	Tyrosine Metabolism	-0.0949043	0.630959	0.944813	-0.170248	0.386412	0.885468	LDL
100021376	3-hydroxymargaroylglycine	Lipid	Fatty Acid Metabolism (Acyl Glycine)	0.108994	0.612177	0.944813	0.184823	0.387263	0.885468	LDL
512	taurine	Amino Acid	Methionine, Cysteine, SAM and Taurine Metabolism	-0.274024	0.158225	0.944813	-0.169427	0.388741	0.885468	LDL
100009227	1-linoleoyl-GPG (18:2)*	Lipid	Lysophospholipid	-0.715508	0.174172	0.944813	-0.5	0.391002	0.885468	LDL
100009328	furaneol sulfate	Xenobiotics	Food Component/Plant	0.454434	0.441979	0.944813	0.5	0.391002	0.885468	LDL
100021223	hexanoyltaurine	Lipid	Endocannabinoid	-0.357074	0.555214	0.944813	-0.5	0.391002	0.885468	LDL
100021666	branched-chain, straight-chain, or cyclopropyl 10:1 fatty acid (1)*	Partially Characterized Molecules	Partially Characterized Molecules	-0.190578	0.758825	0.944813	-0.5	0.391002	0.885468	LDL
100022015	bilirubin degradation product, C16H18N2O5 (4)**	Partially Characterized Molecules	Partially Characterized Molecules	-0.170954	0.484076	0.944813	-0.208772	0.391033	0.885468	LDL
100000276	maltotriose	Carbohydrate	Glycogen Metabolism	0.138867	0.498692	0.944813	0.174389	0.394194	0.885468	LDL
100008904	1-stearoyl-2-oleoyl-GPC (18:0/18:1)	Lipid	Phosphatidylcholine (PC)	-0.243565	0.401403	0.944813	-0.246425	0.395723	0.885468	LDL
100001065	taurolithocholate	Lipid	Secondary Bile Acid Metabolism	-0.673726	0.142315	0.944813	-0.428571	0.396501	0.885468	LDL
100001197	10-undecenoate (11:1n1)	Lipid	Medium Chain Fatty Acid	0.225626	0.325414	0.944813	0.193569	0.400503	0.885468	LDL
100001400	1-methylurate	Xenobiotics	Xanthine Metabolism	-0.35266	0.216188	0.944813	-0.243956	0.400625	0.885468	LDL
100002067	pregnenediol sulfate (C21H34O5S)*	Lipid	Pregnenolone Steroids	-0.428018	0.189088	0.944813	-0.281818	0.401145	0.885468	LDL
100002144	secoisolariciresinol	Xenobiotics	Food Component/Plant	-0.117972	0.729749	0.944813	-0.281818	0.401145	0.885468	LDL
100001843	gamma-glutamylalanine	Peptide	Gamma-glutamyl Amino Acid	0.155758	0.488831	0.944813	0.188082	0.401913	0.885468	LDL
100010879	1,2-dilinoleoyl-galactosylglycerol (18:2/18:2)*	Lipid	Galactosyl Glycerolipids	0.17424	0.438037	0.944813	0.188082	0.401913	0.885468	LDL
1221	creatine	Amino Acid	Creatine Metabolism	-0.188138	0.337687	0.944813	-0.163679	0.405266	0.885468	LDL
100003196	lysylleucine	Peptide	Dipeptide	-0.177945	0.394771	0.944813	-0.17388	0.405834	0.885468	LDL
849	caffeine	Xenobiotics	Xanthine Metabolism	0.112045	0.602192	0.944813	0.17743	0.406859	0.885468	LDL
100000976	glycylproline	Peptide	Dipeptide	-0.147139	0.45496	0.944813	-0.161763	0.410861	0.885468	LDL
100015732	N-pentadecanoyl-sphingosine (d18:1/15:0)*	Lipid	Ceramides	-0.240711	0.335957	0.944813	-0.206505	0.410994	0.885468	LDL
100003640	valylglutamine	Peptide	Dipeptide	-0.174936	0.413591	0.944813	-0.17569	0.411548	0.885468	LDL
241	phenylpyruvate	Amino Acid	Phenylalanine Metabolism	-0.108284	0.62286	0.944813	-0.179842	0.411578	0.885468	LDL
1276	p-hydroxybenzaldehyde	Xenobiotics	Benzoate Metabolism	-0.434583	0.0715139	0.944813	-0.205366	0.413635	0.885468	LDL
100000715	1-methylguanidine	Amino Acid	Guanidino and Acetamido Metabolism	0.155077	0.526128	0.944813	0.198333	0.415671	0.885468	LDL
100001456	7-methylguanine	Nucleotide	Purine Metabolism, Guanine containing	0.180356	0.358406	0.944813	0.16012	0.415691	0.885468	LDL
935	sucrose	Carbohydrate	Disaccharides and Oligosaccharides	0.148792	0.644427	0.944813	0.258741	0.416775	0.885468	LDL
100000251	flavin mononucleotide (FMN)	Cofactors and Vitamins	Riboflavin Metabolism	-0.15195	0.449287	0.944813	-0.162113	0.419167	0.885468	LDL
100002196	13-HODE + 9-HODE	Lipid	Fatty Acid, Monohydroxy	-0.169936	0.449607	0.944813	-0.181305	0.41939	0.885468	LDL
100002094	gamma-CEHC	Cofactors and Vitamins	Tocopherol Metabolism	-0.295049	0.478051	0.944813	-0.333333	0.419753	0.885468	LDL
100000856	trizma acetate	Xenobiotics	Chemical	0.263506	0.342652	0.944813	0.225	0.420105	0.885468	LDL
100000269	glycerophosphorylcholine (GPC)	Lipid	Phospholipid Metabolism	-0.266677	0.187868	0.944813	-0.164815	0.421059	0.885468	LDL
100008998	gamma-tocopherol/beta-tocopherol	Cofactors and Vitamins	Tocopherol Metabolism	0.149723	0.446993	0.944813	0.158204	0.421365	0.885468	LDL
100001579	2-hydroxypalmitate	Lipid	Fatty Acid, Monohydroxy	-0.10313	0.60151	0.944813	-0.157931	0.422179	0.885468	LDL
100008903	1,2-dilinoleoyl-GPC (18:2/18:2)	Lipid	Phosphatidylcholine (PC)	-0.105062	0.659341	0.944813	-0.188793	0.425364	0.885468	LDL
100001502	gamma-glutamyl-2-aminobutyrate	Peptide	Gamma-glutamyl Amino Acid	0.191019	0.531884	0.944813	0.242091	0.425519	0.885468	LDL
100021488	feruloylquinate (4)	Xenobiotics	Food Component/Plant	0.134108	0.532135	0.944813	0.170472	0.425793	0.885468	LDL
100005716	1-oleoyl-GPG (18:1)*	Lipid	Lysophospholipid	-0.20363	0.504602	0.944813	-0.241758	0.426176	0.885468	LDL
100000862	4-hydroxybenzoate	Xenobiotics	Benzoate Metabolism	0.226645	0.381701	0.944813	0.206009	0.427625	0.885468	LDL
100000265	kynurenine	Amino Acid	Tryptophan Metabolism	0.196793	0.482072	0.944813	0.221429	0.427714	0.885468	LDL
100020849	tetrahydrocortisol sulfate (2)	Lipid	Corticosteroids	0.142212	0.61315	0.944813	0.221429	0.427714	0.885468	LDL
1024	pantothenate	Cofactors and Vitamins	Pantothenate and CoA Metabolism	0.118718	0.54738	0.944813	0.156015	0.427902	0.885468	LDL
100001827	pheophytin A	Xenobiotics	Food Component/Plant	0.15252	0.43845	0.944813	0.156015	0.427902	0.885468	LDL
100009063	(3'-5')-cytidylylguanosine	Nucleotide	Dinucleotide	0.224084	0.371375	0.944813	0.199174	0.428158	0.885468	LDL
171	hypoxanthine	Nucleotide	Purine Metabolism, (Hypo)Xanthine/Inosine containing	0.101035	0.608956	0.944813	0.155741	0.428723	0.885468	LDL
880	adenine	Nucleotide	Purine Metabolism, Adenine containing	-0.0522766	0.791633	0.948759	-0.159026	0.418928	0.885468	LDL
100001039	hesperetin	Xenobiotics	Food Component/Plant	0.153486	0.805345	0.956726	0.5	0.391002	0.885468	LDL
100001212	guanidinosuccinate	Amino Acid	Guanidino and Acetamido Metabolism	0.108744	0.81648	0.962356	0.392857	0.383317	0.885468	LDL
100005383	N-methylpipecolate	Xenobiotics	Bacterial/Fungal	0.0403581	0.838431	0.966962	0.17709	0.367319	0.885468	LDL
100021656	val-val-ala	Peptide	Polypeptide	0.0397439	0.840858	0.968317	0.175448	0.37185	0.885468	LDL
100001510	phenol sulfate	Amino Acid	Tyrosine Metabolism	-0.0625149	0.855114	0.968317	0.290909	0.385457	0.885468	LDL
100001975	curcumin	Xenobiotics	Food Component/Plant	-0.0831781	0.875521	0.971241	-0.428571	0.396501	0.885468	LDL
100001570	1-linoleoyl-GPE (18:2)*	Lipid	Lysophospholipid	-0.0225069	0.939125	0.990312	0.243956	0.400625	0.885468	LDL
100003258	2-O-methylascorbic acid	Cofactors and Vitamins	Ascorbate and Aldarate Metabolism	-0.00620404	0.980508	0.998507	0.203302	0.418447	0.885468	LDL
100000856	trizma acetate	Xenobiotics	Chemical	0.377711	0.16513	0.948354	0.267857	0.334444	0.885622	TC
100001279	hyocholate	Lipid	Secondary Bile Acid Metabolism	0.204533	0.502672	0.976869	0.291209	0.334386	0.885622	TC
115	3-hydroxypropanoate	Lipid	Fatty Acid, Monohydroxy	-0.456365	0.303341	0.976869	-0.428571	0.337368	0.885942	TC
1528	1-palmitoyl-2-linoleoyl-GPI (16:0/18:2)	Lipid	Phosphatidylinositol (PI)	-0.378169	0.402904	0.976869	-0.428571	0.337368	0.885942	TC
100001632	formononetin	Xenobiotics	Food Component/Plant	0.481563	0.273871	0.976869	0.428571	0.337368	0.885942	TC
100000708	isovalerate (i5:0)	Amino Acid	Leucine, Isoleucine and Valine Metabolism	0.139816	0.47795	0.944813	0.155194	0.430368	0.886932	LDL
100001182	docosadienoate (22:2n6)	Lipid	Long Chain Polyunsaturated Fatty Acid (n3 and n6)	-0.214864	0.281807	0.944813	-0.157509	0.43267	0.888115	LDL
354	histamine	Amino Acid	Histidine Metabolism	-0.295605	0.233671	0.944813	-0.197212	0.432815	0.888115	LDL
100001823	N-methylalanine	Amino Acid	Alanine and Aspartate Metabolism	-0.117724	0.558679	0.944813	-0.156617	0.435313	0.888559	LDL
100003072	enterodiol	Xenobiotics	Food Component/Plant	-0.211466	0.449307	0.944813	-0.217857	0.435393	0.888559	LDL
100001540	glutamine_degradant*	Partially Characterized Molecules	Partially Characterized Molecules	-0.169308	0.389078	0.944813	-0.152183	0.439475	0.888559	LDL
192	N-acetylputrescine	Amino Acid	Polyamine Metabolism	0.140058	0.47718	0.944813	0.151909	0.440308	0.888559	LDL
823	pyruvate	Carbohydrate	Glycolysis, Gluconeogenesis, and Pyruvate Metabolism	0.137732	0.4846	0.944813	0.151909	0.440308	0.888559	LDL
382	3-sulfo-alanine	Amino Acid	Methionine, Cysteine, SAM and Taurine Metabolism	-0.217203	0.29698	0.944813	-0.16157	0.440364	0.888559	LDL
100015643	sphingadienine	Lipid	Sphingolipid Synthesis	-0.16777	0.422779	0.944813	-0.16157	0.440364	0.888559	LDL
100019974	nonenedioate (C9:1-DC)*	Lipid	Fatty Acid, Dicarboxylate	-0.247107	0.307768	0.944813	-0.187802	0.441345	0.888559	LDL
100001495	pantetheine	Cofactors and Vitamins	Pantothenate and CoA Metabolism	0.158922	0.44799	0.944813	0.161185	0.441467	0.888559	LDL
405	lithocholate	Lipid	Secondary Bile Acid Metabolism	-0.143316	0.46689	0.976869	-0.187192	0.340167	0.889362	TC
1133	tyramine	Amino Acid	Tyrosine Metabolism	-0.200174	0.326858	0.976869	-0.193846	0.342694	0.889362	TC
100003609	tryptophylglycine	Peptide	Dipeptide	-0.216224	0.346504	0.976869	-0.216883	0.345	0.889362	TC
100002367	2R,3R-dihydroxybutyrate	Lipid	Fatty Acid, Dihydroxy	0.123567	0.53102	0.976869	0.185003	0.345947	0.889362	TC
100000718	4-ureidobutyrate	Nucleotide	Pyrimidine Metabolism, Uracil containing	0.25326	0.211908	0.976869	0.192479	0.346176	0.889362	TC
100020487	N-acetyl-isoputreanine	Amino Acid	Polyamine Metabolism	0.0836031	0.767061	0.990578	0.264286	0.341174	0.889362	TC
100001570	1-linoleoyl-GPE (18:2)*	Lipid	Lysophospholipid	0.0813931	0.78208	0.990581	0.274725	0.34183	0.889362	TC
100015637	2-hydroxybehenate	Lipid	Fatty Acid, Monohydroxy	-0.0462098	0.815377	0.990581	-0.185003	0.345947	0.889362	TC
100002913	ursocholate	Lipid	Secondary Bile Acid Metabolism	-0.0824642	0.708354	0.944813	-0.167984	0.443578	0.890688	LDL
1124	citrate	Energy	TCA Cycle	0.155224	0.430276	0.944813	0.150267	0.445323	0.890688	LDL
100001619	glycerophosphoglycerol	Lipid	Glycerolipid Metabolism	0.0735792	0.715311	0.944813	0.153259	0.445344	0.890688	LDL
100006122	ribulose/xylulose	Carbohydrate	Pentose Metabolism	0.124096	0.554518	0.944813	0.159261	0.447008	0.892134	LDL
100015841	erucoylcarnitine (C22:1)*	Lipid	Fatty Acid Metabolism (Acyl Carnitine, Monounsaturated)	-0.597405	0.0522812	0.769949	-0.309091	0.355028	0.893668	TC
100010885	1-palmitoyl-galactosylglycerol (16:0)*	Lipid	Galactosyl Glycerolipids	0.17591	0.458175	0.976869	0.221053	0.348974	0.893668	TC
100000282	N-acetylglutamate	Amino Acid	Glutamate Metabolism	0.130632	0.507605	0.976869	0.183361	0.35032	0.893668	TC
1216	N-acetyl-beta-glucosaminylamine	Carbohydrate	Aminosugar Metabolism	-0.210377	0.28258	0.976869	-0.182266	0.353253	0.893668	TC
100022040	N-butyryl-lysine	Amino Acid	Lysine Metabolism	0.196159	0.317109	0.976869	0.181719	0.354725	0.893668	TC
100021760	N-acetyl-2-aminoadipate	Amino Acid	Lysine Metabolism	0.216417	0.278258	0.976869	0.184982	0.355634	0.893668	TC
803	mannose	Carbohydrate	Fructose, Mannose and Galactose Metabolism	0.248594	0.202097	0.976869	0.181171	0.356201	0.893668	TC
565	tryptophan	Amino Acid	Tryptophan Metabolism	-0.203902	0.297996	0.976869	-0.180624	0.357681	0.893668	TC
100005373	fructosyllysine	Amino Acid	Lysine Metabolism	0.119693	0.544073	0.976869	0.180624	0.357681	0.893668	TC
100020217	N,N,N-trimethyl-alanylproline betaine (TMAP)	Amino Acid	Urea cycle; Arginine and Proline Metabolism	0.16303	0.518042	0.976869	0.230134	0.358254	0.893668	TC
799	betaine	Amino Acid	Glycine, Serine and Threonine Metabolism	0.0601712	0.76101	0.990578	0.182266	0.353253	0.893668	TC
100001397	1,3,7-trimethylurate	Xenobiotics	Xanthine Metabolism	-0.0270224	0.89143	0.990581	0.180077	0.359164	0.893668	TC
100001425	5,6-dihydrouridine	Nucleotide	Pyrimidine Metabolism, Uracil containing	0.186642	0.341615	0.976869	0.179529	0.360651	0.893985	TC
100001452	isovalerylglycine	Amino Acid	Leucine, Isoleucine and Valine Metabolism	0.0749452	0.733963	0.989602	0.199605	0.361178	0.893985	TC
100000863	adipate (C6-DC)	Lipid	Fatty Acid, Dicarboxylate	0.209637	0.284317	0.976869	0.178435	0.363635	0.896042	TC
100000276	maltotriose	Carbohydrate	Glycogen Metabolism	0.14843	0.469283	0.976869	0.185641	0.363899	0.896042	TC
100001623	3-(2-hydroxyphenyl)propionate	Xenobiotics	Benzoate Metabolism	0.285668	0.423649	0.976869	0.321212	0.365468	0.897125	TC
100003169	isoleucylglycine	Peptide	Dipeptide	-0.180587	0.357782	0.976869	-0.17734	0.366634	0.897125	TC
100003258	2-O-methylascorbic acid	Cofactors and Vitamins	Ascorbate and Aldarate Metabolism	0.01313	0.958761	0.994169	0.226006	0.367178	0.897125	TC
35	S-1-pyrroline-5-carboxylate	Amino Acid	Glutamate Metabolism	0.237171	0.32824	0.976869	0.217544	0.37097	0.89965	TC
100001768	N6-carboxymethyllysine	Carbohydrate	Advanced Glycation End-product	0.188343	0.346805	0.976869	0.178877	0.372007	0.89965	TC
100021372	2-hydroxy-4-(methylthio)butanoic acid	Amino Acid	Methionine, Cysteine, SAM and Taurine Metabolism	0.116236	0.580052	0.980887	0.186923	0.370953	0.89965	TC
100021467	pentose acid*	Partially Characterized Molecules	Partially Characterized Molecules	0.114892	0.610663	0.981757	0.200452	0.371083	0.89965	TC
100001979	alpha-tocotrienol	Cofactors and Vitamins	Tocopherol Metabolism	-0.110771	0.574694	0.944813	-0.147803	0.452904	0.900112	LDL
100002417	2,3-dihydroxyisovalerate	Xenobiotics	Food Component/Plant	0.201523	0.303789	0.944813	0.147803	0.452904	0.900112	LDL
100019801	3-hydroxyoleoylcarnitine	Lipid	Fatty Acid Metabolism (Acyl Carnitine, Hydroxy)	0.126435	0.765448	0.944813	0.309524	0.455645	0.901777	LDL
100020502	sulfate of piperine metabolite C18H21NO3 (1)*	Xenobiotics	Food Component/Plant	-0.278676	0.503904	0.944813	-0.309524	0.455645	0.901777	LDL
100001253	N-acetylglutamine	Amino Acid	Glutamate Metabolism	-0.14021	0.476698	0.944813	-0.145888	0.458848	0.905144	LDL
100009050	PAHSA (16:0/OH-18:0)	Lipid	Fatty Acid Hydroxyl Fatty Acid	-0.170397	0.528079	0.944813	-0.198676	0.460733	0.905144	LDL
1082	N-acetylleucine	Amino Acid	Leucine, Isoleucine and Valine Metabolism	0.0895295	0.650507	0.944813	0.145066	0.461407	0.905144	LDL
100001888	alanylproline	Peptide	Dipeptide	-0.208089	0.287968	0.944813	-0.144519	0.463118	0.905144	LDL
100003070	enterolactone	Xenobiotics	Food Component/Plant	0.136426	0.488791	0.944813	0.143698	0.46569	0.905144	LDL
100000491	gamma-glutamylphenylalanine	Peptide	Gamma-glutamyl Amino Acid	-0.184412	0.399594	0.944813	-0.159624	0.466904	0.905144	LDL
100002814	(R)-salsolinol	Amino Acid	Tyrosine Metabolism	0.427753	0.217522	0.944813	0.260606	0.467089	0.905144	LDL
100003495	pinoresinol	Xenobiotics	Food Component/Plant	-0.276693	0.595552	0.944813	-0.371429	0.468478	0.905144	LDL
100002029	androstenediol (3beta,17beta) monosulfate (2)	Lipid	Androgenic Steroids	-0.354654	0.257989	0.944813	-0.230769	0.470532	0.905144	LDL
100001007	ribonate	Carbohydrate	Pentose Metabolism	0.0687973	0.727948	0.944813	0.142056	0.470857	0.905144	LDL
100001621	glycerophosphoinositol*	Lipid	Phospholipid Metabolism	0.224308	0.251171	0.944813	0.142056	0.470857	0.905144	LDL
100002945	(14 or 15)-methylpalmitate (a17:0 or i17:0)	Lipid	Fatty Acid, Branched	-0.205447	0.29427	0.944813	-0.142056	0.470857	0.905144	LDL
100022120	oxindolylalanine	Amino Acid	Tryptophan Metabolism	-0.205808	0.31314	0.944813	-0.147376	0.472479	0.905144	LDL
100001148	5-hydroxyhexanoate	Lipid	Fatty Acid, Monohydroxy	0.261213	0.217611	0.944813	0.153947	0.472622	0.905144	LDL
409	malate	Energy	TCA Cycle	0.0535474	0.786682	0.946768	0.142056	0.470857	0.905144	LDL
100020487	N-acetyl-isoputreanine	Amino Acid	Polyamine Metabolism	-0.052497	0.852596	0.968317	0.203571	0.466795	0.905144	LDL
100019968	lyxonate	Carbohydrate	Pentose Metabolism	0.0772174	0.696129	0.944813	0.140687	0.475185	0.908216	LDL
100000935	apigenin	Xenobiotics	Food Component/Plant	0.0869727	0.70776	0.944813	0.164339	0.476561	0.908954	LDL
100002008	5alpha-androstan-3alpha,17alpha-diol monosulfate	Lipid	Androgenic Steroids	0.141371	0.54103	0.944813	0.16369	0.478329	0.908954	LDL
100002313	oleanolate	Xenobiotics	Food Component/Plant	0.182975	0.513933	0.944813	0.198392	0.478447	0.908954	LDL
1123	chenodeoxycholate	Lipid	Primary Bile Acid Metabolism	-0.473771	0.282841	0.944813	-0.321429	0.482072	0.912184	LDL
100006372	gentisic acid-5-glucoside	Xenobiotics	Chemical	-0.548738	0.202102	0.944813	-0.321429	0.482072	0.912184	LDL
100015988	isohyodeoxycholate	Lipid	Secondary Bile Acid Metabolism	0.121933	0.7058	0.944813	0.224168	0.483666	0.913377	LDL
100002382	2-aminophenol	Xenobiotics	Food Component/Plant	-0.0267026	0.892708	0.990581	-0.172961	0.378774	0.913684	TC
100001452	isovalerylglycine	Amino Acid	Leucine, Isoleucine and Valine Metabolism	0.124955	0.569981	0.944813	0.1532	0.485249	0.914042	LDL
100010917	palmitoyl-oleoyl-glycerol (16:0/18:1) [2]*	Lipid	Diacylglycerol	-0.407051	0.276894	0.944813	-0.266667	0.487922	0.914042	LDL
100020417	N6,N6-dimethyllysine	Amino Acid	Lysine Metabolism	-0.0956079	0.672123	0.944813	-0.155888	0.488464	0.914042	LDL
826	xylose	Carbohydrate	Pentose Metabolism	0.0795648	0.693216	0.944813	0.139215	0.488599	0.914042	LDL
100004635	methionine sulfone	Amino Acid	Methionine, Cysteine, SAM and Taurine Metabolism	-0.170452	0.498898	0.944813	-0.174407	0.488839	0.914042	LDL
1025	pipecolate	Amino Acid	Lysine Metabolism	0.275519	0.164229	0.948354	0.175824	0.380356	0.915171	TC
100006438	citraconate/glutaconate	Energy	TCA Cycle	0.0803031	0.68459	0.944813	0.13576	0.490935	0.916154	LDL
1506	N-linoleoylglycine	Lipid	Fatty Acid Metabolism (Acyl Glycine)	-0.0342598	0.935813	0.990124	-0.285714	0.492726	0.917691	LDL
100001617	undecanedioate (C11-DC)	Lipid	Fatty Acid, Dicarboxylate	0.107811	0.585017	0.944813	0.133571	0.498018	0.92253	LDL
100002613	pantoate	Cofactors and Vitamins	Pantothenate and CoA Metabolism	0.153655	0.435008	0.944813	0.133023	0.499797	0.92253	LDL
1095	tryptamine	Amino Acid	Tryptophan Metabolism	0.0734676	0.745243	0.944813	0.151892	0.499815	0.92253	LDL
100021252	ginkgolic acid C15:1	Xenobiotics	Food Component/Plant	-0.360948	0.128953	0.944813	-0.164912	0.499881	0.92253	LDL
100000802	acetylcarnitine (C2)	Lipid	Fatty Acid Metabolism (Acyl Carnitine, Short Chain)	-0.140229	0.680898	0.944813	-0.227273	0.501536	0.92253	LDL
100021250	ginkgolic acid C13:0	Xenobiotics	Food Component/Plant	-0.161831	0.634511	0.944813	-0.227273	0.501536	0.92253	LDL
100001026	galactonate	Carbohydrate	Fructose, Mannose and Galactose Metabolism	0.134348	0.512901	0.944813	0.137459	0.503096	0.92253	LDL
267	choline phosphate	Lipid	Phospholipid Metabolism	-0.192256	0.403768	0.944813	-0.154596	0.503428	0.92253	LDL
100020727	(3'-5')-cytidylylcytidine*	Nucleotide	Dinucleotide	-0.168249	0.518606	0.944813	-0.17402	0.50415	0.92253	LDL
100001106	1,3-dimethylurate	Xenobiotics	Xanthine Metabolism	0.079135	0.694795	0.944813	0.132804	0.509028	0.92253	LDL
172	guanine	Nucleotide	Purine Metabolism, Guanine containing	-0.0853793	0.665758	0.944813	-0.130012	0.509637	0.92253	LDL
98	kynurenate	Amino Acid	Tryptophan Metabolism	0.093987	0.634279	0.944813	0.129739	0.510537	0.92253	LDL
297	sphingosine	Lipid	Sphingosines	-0.171959	0.381585	0.944813	-0.129739	0.510537	0.92253	LDL
100001614	hexadecanedioate (C16-DC)	Lipid	Fatty Acid, Dicarboxylate	-0.121689	0.537326	0.944813	-0.129739	0.510537	0.92253	LDL
100001359	aconitate [cis or trans]	Energy	TCA Cycle	0.106448	0.664482	0.944813	0.160597	0.511319	0.92253	LDL
504	serotonin	Amino Acid	Tryptophan Metabolism	0.0669553	0.745196	0.944813	-0.134382	0.512793	0.92253	LDL
100021471	N-isobutyryl-phenylalanine	Amino Acid	Phenylalanine Metabolism	-0.220616	0.490803	0.944813	-0.20979	0.512841	0.92253	LDL
100009237	2-acetamidobutanoate	Xenobiotics	Bacterial/Fungal	0.0690971	0.822526	0.962356	0.203297	0.505315	0.92253	LDL
100020993	cyclo(his-pro) (D,L)*	Peptide	Dipeptide	0.391671	0.337267	0.976869	0.357143	0.385121	0.92429	TC
1518	N-palmitoyl-sphingosine (d18:1/16:0)	Lipid	Ceramides	-0.142452	0.469607	0.976869	-0.170224	0.386478	0.925206	TC
100001287	epiandrosterone sulfate	Lipid	Androgenic Steroids	0.593382	0.0252925	0.769949	0.243956	0.400625	0.925305	TC
302	deoxycholate	Lipid	Secondary Bile Acid Metabolism	-0.28625	0.156285	0.948354	-0.176068	0.389584	0.925305	TC
100010879	1,2-dilinoleoyl-galactosylglycerol (18:2/18:2)*	Lipid	Galactosyl Glycerolipids	0.161391	0.473047	0.976869	0.192547	0.390627	0.925305	TC
100001950	bilirubin (E,E)*	Cofactors and Vitamins	Hemoglobin and Porphyrin Metabolism	0.166353	0.471099	0.976869	0.197403	0.391055	0.925305	TC
424	palmitate (16:0)	Lipid	Long Chain Saturated Fatty Acid	-0.141352	0.473079	0.976869	-0.168035	0.392706	0.925305	TC
100000983	3-hydroxypalmitate	Lipid	Fatty Acid, Monohydroxy	0.334206	0.517355	0.976869	0.428571	0.396501	0.925305	TC
100002129	pregnenolone sulfate	Lipid	Pregnenolone Steroids	0.559422	0.248403	0.976869	0.428571	0.396501	0.925305	TC
100003109	2-oxindole-3-acetate	Xenobiotics	Food Component/Plant	0.214913	0.291731	0.976869	0.173333	0.397107	0.925305	TC
100002102	N-acetyl-beta-alanine	Nucleotide	Pyrimidine Metabolism, Uracil containing	-0.189213	0.467022	0.976869	-0.218137	0.400295	0.925305	TC
100000802	acetylcarnitine (C2)	Lipid	Fatty Acid Metabolism (Acyl Carnitine, Short Chain)	-0.292386	0.382939	0.976869	-0.281818	0.401145	0.925305	TC
100004295	2-piperidinone	Xenobiotics	Food Component/Plant	-0.129214	0.512263	0.976869	-0.164204	0.403741	0.925305	TC
100022485	N-lactoyl valine	Amino Acid	Lactoyl Amino Acid	-0.243887	0.421986	0.976869	-0.252747	0.404774	0.925305	TC
100002125	11-ketoetiocholanolone sulfate	Lipid	Androgenic Steroids	0.297312	0.281854	0.976869	0.232143	0.405099	0.925305	TC
100001769	N6-carboxyethyllysine	Amino Acid	Lysine Metabolism	-0.229144	0.331154	0.976869	-0.196992	0.405152	0.925305	TC
192	N-acetylputrescine	Amino Acid	Polyamine Metabolism	0.204914	0.295552	0.976869	0.163656	0.405331	0.925305	TC
100021654	ala-leu-ala	Peptide	Polypeptide	0.180217	0.368375	0.976869	0.166667	0.406041	0.925305	TC
100001436	3-ketosphinganine	Lipid	Sphingolipid Synthesis	0.139574	0.606174	0.981757	0.223529	0.405298	0.925305	TC
100009413	4-acetamidobenzoate	Xenobiotics	Chemical	0.22037	0.674796	0.989602	0.428571	0.396501	0.925305	TC
100001615	octadecanedioate (C18-DC)	Lipid	Fatty Acid, Dicarboxylate	0.0372781	0.876008	0.990581	-0.198496	0.401504	0.925305	TC
100015642	N-(2-hydroxypalmitoyl)-sphingosine (d18:1/16:0(2OH))	Lipid	Ceramides	-0.035474	0.86056	0.990581	-0.167277	0.404299	0.925305	TC
74	guanosine-2',3'-cyclic monophosphate	Nucleotide	Purine Metabolism, Guanine containing	0.355172	0.233699	0.944813	0.197802	0.517131	0.926104	LDL
100001337	linolenate [alpha or gamma; (18:3n3 or 6)]	Lipid	Long Chain Polyunsaturated Fatty Acid (n3 and n6)	0.113929	0.563767	0.944813	0.127549	0.517759	0.926104	LDL
100021018	2-iminopiperidine	Xenobiotics	Chemical	0.0537537	0.798574	0.953461	0.135795	0.517487	0.926104	LDL
100001211	sebacate (C10-DC)	Lipid	Fatty Acid, Dicarboxylate	-0.0605026	0.759731	0.944813	-0.126454	0.521388	0.930794	LDL
100019886	valerylhistidine*	Peptide	Dipeptide	-0.0423062	0.871922	0.971241	0.166769	0.522345	0.930794	LDL
100003210	valylleucine	Peptide	Dipeptide	-0.121869	0.536721	0.976869	-0.162014	0.410124	0.932369	TC
144	4-hydroxyphenylacetate	Amino Acid	Phenylalanine Metabolism	-0.166874	0.435768	0.976869	-0.175652	0.411651	0.932799	TC
100015643	sphingadienine	Lipid	Sphingolipid Synthesis	-0.170572	0.414959	0.976869	-0.171538	0.412282	0.932799	TC
100001734	N6-acetyllysine	Amino Acid	Lysine Metabolism	0.0570978	0.772892	0.990578	0.16092	0.413337	0.93296	TC
100002107	palmitoyl sphingomyelin (d18:1/16:0)	Lipid	Sphingomyelins	-0.149259	0.476409	0.944813	-0.133487	0.524696	0.933231	LDL
100019966	3-hydroxyoleate*	Lipid	Fatty Acid, Monohydroxy	-0.210151	0.5121	0.976869	-0.258741	0.416775	0.934048	TC
100015735	ceramide (d18:1/14:0, d16:1/16:0)*	Lipid	Ceramides	-0.0975246	0.628436	0.984433	-0.163614	0.414813	0.934048	TC
182	quinolinate	Cofactors and Vitamins	Nicotinate and Nicotinamide Metabolism	0.0673784	0.797226	0.990581	0.210784	0.41675	0.934048	TC
100003518	alanyllysine	Peptide	Dipeptide	0.169749	0.487209	0.944813	0.154454	0.527813	0.934936	LDL
100004644	1-methylhypoxanthine	Nucleotide	Purine Metabolism, (Hypo)Xanthine/Inosine containing	-0.439916	0.132511	0.944813	-0.192308	0.529068	0.934936	LDL
100009392	1,2-dilinolenoyl-digalactosylglycerol (18:3/18:3)	Lipid	Galactosyl Glycerolipids	-0.288782	0.451064	0.944813	-0.24268	0.529241	0.934936	LDL
100002367	2R,3R-dihydroxybutyrate	Lipid	Fatty Acid, Dihydroxy	0.057782	0.770243	0.944813	0.123991	0.5296	0.934936	LDL
100021252	ginkgolic acid C15:1	Xenobiotics	Food Component/Plant	-0.415308	0.0770175	0.90139	-0.194737	0.424346	0.935995	TC
100005466	N-acetyltaurine	Amino Acid	Methionine, Cysteine, SAM and Taurine Metabolism	-0.20195	0.5082	0.976869	-0.241758	0.426176	0.935995	TC
100002008	5alpha-androstan-3alpha,17alpha-diol monosulfate	Lipid	Androgenic Steroids	0.167767	0.467283	0.976869	0.183117	0.426895	0.935995	TC
100003415	N6-methyllysine	Amino Acid	Lysine Metabolism	0.186028	0.352872	0.976869	0.159341	0.42727	0.935995	TC
100001262	gamma-glutamyl-epsilon-lysine	Peptide	Gamma-glutamyl Amino Acid	0.123145	0.540577	0.976869	0.15873	0.429066	0.935995	TC
100000036	3-methyl-2-oxovalerate	Amino Acid	Leucine, Isoleucine and Valine Metabolism	0.267301	0.241443	0.976869	0.181818	0.430238	0.935995	TC
100003641	valylglycine	Peptide	Dipeptide	-0.128018	0.516209	0.976869	-0.154899	0.431255	0.935995	TC
100004328	sphingomyelin (d18:1/14:0, d16:1/16:0)*	Lipid	Sphingomyelins	-0.26974	0.558551	0.976869	-0.357143	0.431611	0.935995	TC
100005946	2-keto-3-deoxy-gluconate	Xenobiotics	Food Component/Plant	0.153254	0.436223	0.976869	0.154351	0.432905	0.935995	TC
100000054	5-hydroxylysine	Amino Acid	Lysine Metabolism	0.277425	0.408836	0.976869	0.263636	0.433441	0.935995	TC
100001655	1-palmitoyl-GPI (16:0)	Lipid	Lysophospholipid	-0.139427	0.620189	0.984433	-0.221429	0.427714	0.935995	TC
100015732	N-pentadecanoyl-sphingosine (d18:1/15:0)*	Lipid	Ceramides	-0.0856119	0.73554	0.989602	-0.201238	0.423288	0.935995	TC
100021199	stigmastadienone	Lipid	Sterol	0.0645192	0.74918	0.989602	0.159951	0.425478	0.935995	TC
100001216	delta-tocopherol	Cofactors and Vitamins	Tocopherol Metabolism	0.0899752	0.66886	0.989602	0.164615	0.431677	0.935995	TC
100001510	phenol sulfate	Amino Acid	Tyrosine Metabolism	0.132619	0.697488	0.989602	0.263636	0.433441	0.935995	TC
100022482	N-lactoyl phenylalanine	Amino Acid	Lactoyl Amino Acid	0.0641556	0.765836	0.990578	0.171304	0.423503	0.935995	TC
100005372	1-(1-enyl-oleoyl)-GPE (P-18:1)*	Lipid	Lysoplasmalogen	0.209926	0.452692	0.976869	0.217857	0.435393	0.937713	TC
800	cysteine	Amino Acid	Methionine, Cysteine, SAM and Taurine Metabolism	0.0849228	0.667444	0.989602	0.153257	0.436215	0.937713	TC
1869	2-hydroxyhippurate (salicylurate)	Xenobiotics	Benzoate Metabolism	-0.518276	0.102419	0.948354	-0.245455	0.466922	0.938883	TC
100009030	lactosyl-N-palmitoyl-sphingosine (d18:1/16:0)	Lipid	Lactosylceramides (LCER)	-0.475284	0.165055	0.948354	-0.260606	0.467089	0.938883	TC
100001065	taurolithocholate	Lipid	Secondary Bile Acid Metabolism	-0.620462	0.188737	0.954656	-0.371429	0.468478	0.938883	TC
2054	ethylmalonate	Amino Acid	Leucine, Isoleucine and Valine Metabolism	0.196121	0.317206	0.976869	-0.152162	0.439538	0.938883	TC
100000269	glycerophosphorylcholine (GPC)	Lipid	Phospholipid Metabolism	-0.251987	0.214291	0.976869	-0.158291	0.439925	0.938883	TC
100000631	N-oleoyl-sphingosine (d18:1/18:1)*	Lipid	Ceramides	-0.162252	0.428416	0.976869	-0.157607	0.441928	0.938883	TC
100002744	8-hydroxyguanine	Nucleotide	Purine Metabolism, Guanine containing	0.148998	0.449218	0.976869	0.149973	0.446225	0.938883	TC
100001816	deoxymugineic acid	Xenobiotics	Food Component/Plant	-0.124667	0.561637	0.976869	-0.161739	0.450219	0.938883	TC
100001006	N-acetylglycine	Amino Acid	Glycine, Serine and Threonine Metabolism	0.164004	0.454606	0.976869	0.16502	0.451778	0.938883	TC
100002107	palmitoyl sphingomyelin (d18:1/16:0)	Lipid	Sphingomyelins	-0.151519	0.469681	0.976869	-0.156923	0.453794	0.938883	TC
480	proline	Amino Acid	Urea cycle; Arginine and Proline Metabolism	0.124834	0.526782	0.976869	0.147236	0.454661	0.938883	TC
100021488	feruloylquinate (4)	Xenobiotics	Food Component/Plant	0.133996	0.532479	0.976869	0.16	0.45517	0.938883	TC
100001596	2-methylmalonylcarnitine (C4-DC)	Lipid	Fatty Acid Metabolism (also BCAA Metabolism)	0.240759	0.565718	0.976869	0.309524	0.455645	0.938883	TC
100004499	6-oxopiperidine-2-carboxylate	Amino Acid	Lysine Metabolism	-0.209597	0.337127	0.976869	-0.163043	0.457288	0.938883	TC
100003434	imidazole propionate	Amino Acid	Histidine Metabolism	0.145118	0.461247	0.976869	0.146141	0.458058	0.938883	TC
100020849	tetrahydrocortisol sulfate (2)	Lipid	Corticosteroids	0.297549	0.281453	0.976869	0.207143	0.458843	0.938883	TC
100001789	sucralose	Xenobiotics	Food Component/Plant	0.316842	0.406123	0.976869	0.283333	0.46003	0.938883	TC
500	riboflavin (vitamin B2)	Cofactors and Vitamins	Riboflavin Metabolism	0.239661	0.219317	0.976869	0.144499	0.46318	0.938883	TC
100002067	pregnenediol sulfate (C21H34O5S)*	Lipid	Pregnenolone Steroids	-0.390651	0.234877	0.976869	-0.245455	0.466922	0.938883	TC
477	pristanate	Lipid	Fatty Acid, Branched	-0.376098	0.284114	0.976869	-0.260606	0.467089	0.938883	TC
100003493	tyrosol	Amino Acid	Tyrosine Metabolism	0.167852	0.443941	0.976869	0.158103	0.471216	0.938883	TC
100002023	5alpha-androstan-3beta,17beta-diol monosulfate (1)	Lipid	Androgenic Steroids	0.186899	0.41724	0.976869	0.166234	0.471422	0.938883	TC
100001790	glycylisoleucine	Peptide	Dipeptide	-0.10637	0.590076	0.980887	-0.145594	0.459762	0.938883	TC
891	margarate (17:0)	Lipid	Long Chain Saturated Fatty Acid	-0.104972	0.594997	0.980887	-0.145047	0.461469	0.938883	TC
100001485	gamma-glutamylisoleucine*	Peptide	Gamma-glutamyl Amino Acid	0.121687	0.599268	0.980887	0.168831	0.464423	0.938883	TC
100021065	lactobacillic acid	Xenobiotics	Bacterial/Fungal	0.10567	0.607421	0.981757	0.150769	0.462227	0.938883	TC
100009050	PAHSA (16:0/OH-18:0)	Lipid	Fatty Acid Hydroxyl Fatty Acid	-0.113552	0.675419	0.989602	-0.205882	0.444285	0.938883	TC
100022041	N,N-dimethyl-pro-pro	Peptide	Modified Peptides	0.106975	0.662915	0.989602	0.184211	0.450285	0.938883	TC
100010932	linolenoyl-linolenoyl-glycerol (18:3/18:3) [1]*	Lipid	Diacylglycerol	0.0799243	0.691897	0.989602	0.147131	0.463963	0.938883	TC
100004059	histidine betaine (hercynine)*	Xenobiotics	Food Component/Plant	0.0368914	0.892105	0.990581	0.205882	0.444285	0.938883	TC
100001579	2-hydroxypalmitate	Lipid	Fatty Acid, Monohydroxy	-0.0523119	0.791496	0.990581	-0.149425	0.447906	0.938883	TC
100021656	val-val-ala	Peptide	Polypeptide	0.0342472	0.862646	0.990581	0.148331	0.451276	0.938883	TC
880	adenine	Nucleotide	Purine Metabolism, Adenine containing	-0.0319513	0.871776	0.990581	-0.145594	0.459762	0.938883	TC
100001145	3-hydroxysebacate	Lipid	Fatty Acid, Monohydroxy	0.0536059	0.812713	0.990581	0.163185	0.468077	0.938883	TC
100002606	N-carbamoylsarcosine	Amino Acid	Creatine Metabolism	-0.0103361	0.965503	0.994169	0.171429	0.469886	0.938883	TC
100001606	cholesterol sulfate	Lipid	Sterol	0.0863769	0.66208	0.944813	0.122622	0.534188	0.939145	LDL
100001580	docosapentaenoate (n6 DPA; 22:5n6)	Lipid	Long Chain Polyunsaturated Fatty Acid (n3 and n6)	0.336552	0.460452	0.944813	0.285714	0.534509	0.939145	LDL
798	adenosine	Nucleotide	Purine Metabolism, Adenine containing	0.226958	0.350098	0.944813	0.151821	0.534956	0.939145	LDL
100000486	N6-formyllysine	Amino Acid	Lysine Metabolism	-0.322654	0.115699	0.948354	-0.14	0.504477	0.9392	TC
100002814	(R)-salsolinol	Amino Acid	Tyrosine Metabolism	0.490793	0.149767	0.948354	0.236364	0.510885	0.9392	TC
100002945	(14 or 15)-methylpalmitate (a17:0 or i17:0)	Lipid	Fatty Acid, Branched	-0.175228	0.37246	0.976869	-0.141215	0.473512	0.9392	TC
100000258	glycerol 3-phosphate	Lipid	Glycerolipid Metabolism	0.131581	0.504498	0.976869	0.14012	0.476983	0.9392	TC
229	arachidonate (20:4n6)	Lipid	Long Chain Polyunsaturated Fatty Acid (n3 and n6)	-0.114723	0.561035	0.976869	-0.139026	0.480466	0.9392	TC
482	lactate	Carbohydrate	Glycolysis, Gluconeogenesis, and Pyruvate Metabolism	0.136076	0.489918	0.976869	0.139026	0.480466	0.9392	TC
100005258	2,4-dihydroxyhydrocinnamate	Xenobiotics	Benzoate Metabolism	-0.4975	0.255934	0.976869	-0.321429	0.482072	0.9392	TC
100010934	diacylglycerol (14:0/18:1, 16:0/16:1) [1]*	Lipid	Diacylglycerol	0.450664	0.310194	0.976869	0.321429	0.482072	0.9392	TC
100001402	5-acetylamino-6-formylamino-3-methyluracil	Xenobiotics	Xanthine Metabolism	0.171508	0.392342	0.976869	0.138584	0.490593	0.9392	TC
1102	gamma-glutamyltyrosine	Peptide	Gamma-glutamyl Amino Acid	0.217329	0.436535	0.976869	0.192857	0.491049	0.9392	TC
512	taurine	Amino Acid	Methionine, Cysteine, SAM and Taurine Metabolism	-0.199912	0.307754	0.976869	-0.133552	0.498078	0.9392	TC
100004363	cyclo(pro-tyr)	Peptide	Dipeptide	0.168944	0.50276	0.976869	0.170279	0.499341	0.9392	TC
338	gluconate	Xenobiotics	Food Component/Plant	0.175075	0.372886	0.976869	0.13191	0.503423	0.9392	TC
100001657	glycolithocholate sulfate*	Lipid	Secondary Bile Acid Metabolism	-0.592483	0.292441	0.976869	-0.4	0.504632	0.9392	TC
100004509	S-allylcysteine	Xenobiotics	Food Component/Plant	0.666947	0.218836	0.976869	0.4	0.504632	0.9392	TC
100015839	dihomo-linoleoylcarnitine (C20:2)*	Lipid	Fatty Acid Metabolism (Acyl Carnitine, Polyunsaturated)	0.233953	0.350109	0.976869	0.168215	0.504633	0.9392	TC
100001314	gamma-glutamylthreonine	Peptide	Gamma-glutamyl Amino Acid	0.269992	0.236556	0.976869	0.153247	0.507204	0.9392	TC
439	stearate (18:0)	Lipid	Long Chain Saturated Fatty Acid	-0.131255	0.505565	0.976869	-0.130268	0.508797	0.9392	TC
100001086	N-(2-furoyl)glycine	Xenobiotics	Food Component/Plant	0.212541	0.38234	0.976869	0.161404	0.509171	0.9392	TC
100003542	histidylalanine	Peptide	Dipeptide	-0.356653	0.311717	0.976869	-0.236364	0.510885	0.9392	TC
100015846	nervonoylcarnitine (C24:1)*	Lipid	Fatty Acid Metabolism (Acyl Carnitine, Monounsaturated)	-0.273858	0.443878	0.976869	-0.236364	0.510885	0.9392	TC
100019978	octadecenedioate (C18:1-DC)	Lipid	Fatty Acid, Dicarboxylate	0.208542	0.51541	0.976869	0.20979	0.512841	0.9392	TC
1526	1-palmitoyl-2-oleoyl-GPE (16:0/18:1)	Lipid	Phosphatidylethanolamine (PE)	0.155942	0.499671	0.976869	0.148052	0.521874	0.9392	TC
100008932	phenylacetyltaurine	Peptide	Acetylated Peptides	-0.241972	0.404587	0.976869	-0.186813	0.522504	0.9392	TC
136	cholate	Lipid	Primary Bile Acid Metabolism	-0.172495	0.40964	0.976869	-0.133846	0.523572	0.9392	TC
100003001	1-(1-enyl-stearoyl)-GPE (P-18:0)*	Lipid	Lysoplasmalogen	-0.145501	0.478193	0.976869	-0.13094	0.523744	0.9392	TC
100009325	3-carboxyadipate	Lipid	Fatty Acid, Dicarboxylate	-0.140562	0.484362	0.976869	-0.126984	0.527929	0.9392	TC
100002912	tauroursodeoxycholate	Lipid	Secondary Bile Acid Metabolism	-0.349513	0.396078	0.976869	-0.261905	0.530923	0.9392	TC
100000292	protoporphyrin IX	Cofactors and Vitamins	Hemoglobin and Porphyrin Metabolism	-0.158944	0.419171	0.976869	-0.123153	0.532407	0.9392	TC
100000453	paraxanthine	Xenobiotics	Xanthine Metabolism	0.137037	0.513629	0.976869	0.13	0.535679	0.9392	TC
100001229	stearidonate (18:4n3)	Lipid	Long Chain Polyunsaturated Fatty Acid (n3 and n6)	-0.133087	0.56522	0.976869	-0.142857	0.536741	0.9392	TC
100002022	5alpha-androstan-3beta,17alpha-diol monosulfate (1)	Lipid	Androgenic Steroids	0.15879	0.491773	0.976869	0.142857	0.536741	0.9392	TC
100001581	N-methylleucine	Amino Acid	Leucine, Isoleucine and Valine Metabolism	-0.251153	0.366569	0.976869	-0.171429	0.541272	0.9392	TC
100021236	dehydrophytosphingosine*	Lipid	Sphingolipid Synthesis	-0.168203	0.421566	0.976869	-0.127692	0.543006	0.9392	TC
100020361	3-amino-2-piperidone	Amino Acid	Urea cycle; Arginine and Proline Metabolism	-0.126949	0.55444	0.976869	-0.130435	0.543526	0.9392	TC
100001990	taurocholenate sulfate*	Lipid	Secondary Bile Acid Metabolism	-0.438302	0.384648	0.976869	-0.314286	0.544093	0.9392	TC
100020840	linolenoyl ethanolamide	Lipid	Endocannabinoid	0.241146	0.531929	0.976869	0.233333	0.545699	0.9392	TC
100001258	glycylleucine	Peptide	Dipeptide	-0.124381	0.528295	0.976869	-0.118774	0.54719	0.9392	TC
1221	creatine	Amino Acid	Creatine Metabolism	-0.117224	0.55247	0.976869	-0.117679	0.550916	0.9392	TC
100008980	1-stearoyl-2-linoleoyl-GPC (18:0/18:2)*	Lipid	Phosphatidylcholine (PC)	0.153955	0.529163	0.976869	0.145614	0.55197	0.9392	TC
821	pseudouridine	Nucleotide	Pyrimidine Metabolism, Uracil containing	0.177802	0.365366	0.976869	0.116585	0.554653	0.9392	TC
100002749	S-methylcysteine	Amino Acid	Methionine, Cysteine, SAM and Taurine Metabolism	-0.340684	0.305255	0.976869	0.2	0.555445	0.9392	TC
100006370	3beta-hydroxy-5-cholestenoate	Lipid	Sterol	0.326541	0.357108	0.976869	0.212121	0.556306	0.9392	TC
2029	azelate (C9-DC)	Lipid	Fatty Acid, Dicarboxylate	0.119736	0.543927	0.976869	0.116037	0.556526	0.9392	TC
100002029	androstenediol (3beta,17beta) monosulfate (2)	Lipid	Androgenic Steroids	-0.287248	0.365318	0.976869	-0.188811	0.556737	0.9392	TC
100001401	methylurea	Amino Acid	Urea cycle; Arginine and Proline Metabolism	0.179436	0.37049	0.976869	0.117216	0.560388	0.9392	TC
100004111	4-methylcatechol sulfate	Xenobiotics	Benzoate Metabolism	-0.243644	0.401246	0.976869	-0.169231	0.563017	0.9392	TC
311	homocysteine	Amino Acid	Methionine, Cysteine, SAM and Taurine Metabolism	0.137673	0.48479	0.976869	0.112206	0.569717	0.9392	TC
100010872	1-linoleoyl-2-linolenoyl-digalactosylglycerol (18:2/18:3)*	Lipid	Galactosyl Glycerolipids	0.359795	0.381344	0.976869	0.238095	0.570156	0.9392	TC
100002254	stearoyl ethanolamide	Lipid	Endocannabinoid	-0.162172	0.409661	0.976869	-0.111111	0.573512	0.9392	TC
100002569	D-urobilin	Cofactors and Vitamins	Hemoglobin and Porphyrin Metabolism	0.112769	0.567769	0.978628	0.119869	0.543477	0.9392	TC
100008986	glutamyl-meso-diaminopimelate	Xenobiotics	Bacterial/Fungal	0.135823	0.579287	0.980887	0.168421	0.490672	0.9392	TC
100001890	alanylleucine	Peptide	Dipeptide	-0.107855	0.584866	0.980887	-0.13191	0.503423	0.9392	TC
1668	taurodeoxycholate	Lipid	Secondary Bile Acid Metabolism	-0.204244	0.571393	0.980887	-0.236364	0.510885	0.9392	TC
1239	2-hydroxystearate	Lipid	Fatty Acid, Monohydroxy	-0.123586	0.583733	0.980887	-0.143986	0.522641	0.9392	TC
100001126	gamma-glutamylvaline	Peptide	Gamma-glutamyl Amino Acid	-0.111807	0.594666	0.980887	-0.133077	0.525983	0.9392	TC
100021018	2-iminopiperidine	Xenobiotics	Chemical	0.113521	0.588991	0.980887	0.117692	0.575283	0.9392	TC
391	citrulline	Amino Acid	Urea cycle; Arginine and Proline Metabolism	0.095079	0.630328	0.984433	0.137931	0.483963	0.9392	TC
1134	urate	Nucleotide	Purine Metabolism, (Hypo)Xanthine/Inosine containing	0.0962636	0.626053	0.984433	0.1341	0.496302	0.9392	TC
100005805	1-palmitoyl-GPS (16:0)*	Lipid	Lysophospholipid	0.252512	0.629282	0.984433	0.314286	0.544093	0.9392	TC
100001568	1-myristoyl-GPE (14:0)	Lipid	Lysophospholipid	0.12451	0.622542	0.984433	0.147575	0.55897	0.9392	TC
[truncated: 819 more rows]

## Sheet: Supplementary TableS6-3
	Pearson correlation			Spearman correlation			Response
[truncated: 287 more rows]

[truncated: 1 more sheets: Supplementary TableS6-4]
