# Supplementary material for: Cholesterol-lowering effects of oats induced by microbially produced phenolic metabolites
Source: Research Square preprint supplement (doi:10.21203/rs.3.rs-4188074/v1), 2024-07-16
Supplement: Supplementary file 2 [file 4ce4ea07a0b61b8a8f93361f.xlsx]

## Sheet: Legend
The tables show detail information on the weight loadings (importance) of each selected feature in the different models performed
Supplementary Table	Approach	Aim
S3-1	sPLS-DA	To identify diet-induced changes in clinical markers discriminating OG from CG
S3-2	sPLS-DA	To identify diet-induced changes in microbial composition discriminating OG from CG
S3-3	sPLS-DA	To identify diet-induced changes in microbial pathways discriminating OG from CG
S3-4	sPLS-DA	To identify diet-induced changes in plasma metabolomic profile discriminating OG from CG
S3-5	sPLS-DA	To identify diet-induced changes in fecal metabolomic profile discriminating OG from CG
S3-6	DIABLO	To examine the correlations between changes in metabolic data, targeted plasma metabolomic pofile, global plasma and fecal metabolomic profiles as well as gut microbiota composition (model 1)
S3-7	DIABLO	To examine the correlations between changes in metabolic data, targeted plasma metabolomic pofile, global plasma and fecal metabolomic profiles as well as gut microbiota function (model 2)
Supplementary Table S3-4 to Table S3-7
		Data key & chemical annotation descriptions
Biochemical name		Name of the identified biochemical
	Biochemical name	Indicates a compound that has been confirmed based on an authentic chemical standard and we are highly confident in its identity. (Metabolomics Standards Initiative Tier 1 identification)
	Biochemical name*	Indicates a compound that has not been confirmed based on a standard, but we are confident in its identity. (Not Tier 1)
	Biochemical name**	Indicates a compound for which a standard is not available, but we are reasonably confident in its identity or the information provided. (Not Tier 1)
	Biochemical name (#) or [#]	Indicates a compound that is a structural isomer of another compound in the Metabolon spectral library. For example, a steroid that may be sulfated at one of several positions that are indistinguishable by the mass spectrometry data or a diacylglycerol for which more than one stereospecific molecule exists.
Super pathway		The general biochemical class assigned to the identified biochemical (e.g. lipid, amino acid, carbohydrate, etc.) intended for sorting compounds by broad biochemical classes
Sub-pathway		A more specific biochemical class assigned to the identified biochemical (e.g. TCA cycle, monoacylglycerols, etc.) intended for grouping/sorting compounds by biochemical pathway/class

## Sheet: Supplementary Table S3-1
Component	Selected feature	Group contribution assigned by the model	Importance	OG	CG	Change in OG compared with CG
1
	LDL-C	CG	-0.795214	-0.599806	0.67978	decrease
	TC	CG	-0.54801	-0.513576	0.582053	decrease
	DBP	CG	-0.25946	-0.412924	0.467981	decrease
2
	Uric acid	OG	0.39101	0.19122	-0.216716	increase
	Body weight	CG	-0.367822	-0.234472	0.265734	decrease
	BMI	CG	-0.367822	-0.234472	0.265734	decrease
	SBP	CG	-0.336167	-0.32242	0.365409	decrease
	Lipase	CG	-0.316513	-0.137858	0.156239	decrease
	FM	CG	-0.291098	-0.0563548	0.0638687	decrease
	Bilirubin	OG	0.270664	0.0827988	-0.0938387	increase
	DBP	CG	-0.241146	-0.412924	0.467981	decrease
	ALT	OG	0.211893	0.0813638	-0.0922123	increase
	Creatinine	CG	0.165633	-0.136094	0.15424	decrease
	Urea	CG	-0.162354	-0.273113	0.309528	decrease
	GGT	CG	0.103943	-0.166456	0.18865	decrease
	TG	OG	0.0936644	0.0588373	-0.0666822	increase
	HDL	CG	0.0867767	-0.252237	0.285868	decrease
	Pulse	OG	0.082155	0.151921	-0.172177	increase
	AST	CG	0.073226	-0.108673	0.123162	decrease
	WC	CG	-0.0586285	-0.138863	0.157378	decrease
	TC	CG	0.0572717	-0.513576	0.582053	decrease
	GFR	OG	-0.0505909	0.242917	-0.275306	increase

## Sheet: Supplementary Table S3-2
Component	Selected feature: genera	Group contribution assigned by the model	Importance	OG	CG	Change in OG compared with CG
1
	Erysipelotrichaceae UCG-003	OG	-1	0.607637	-0.810183	increase
2
	Fusicatenibacter	OG	-0.346789	0.348045	-0.46406	increase
	Methanobrevibacter	OG	-0.296396	0.139324	-0.185765	increase
	Marvinbryantia	CG	0.281929	-0.457745	0.610327	decrease
	Monoglobus	CG	0.27665	-0.120502	0.160669	decrease
	Clostridia vadinBB60 group	OG	-0.271797	0.0978343	-0.130446	increase
	Eubacterium xylanophilum group	OG	-0.256388	0.13479	-0.17972	increase
	Haemophilus	OG	-0.236176	0.304865	-0.406486	increase
	Intestinimonas	OG	-0.236085	0.373781	-0.498374	increase
	Parasutterella	OG	-0.222805	0.434392	-0.579189	increase
	Mitsuokella	OG	-0.196621	0.357095	-0.476127	increase
	Hydrogenoanaerobacterium	OG	-0.180332	0.228051	-0.304068	increase
	[Eggerthellaceae] uncultured	CG	0.171334	-0.0775048	0.10334	decrease
	Eggerthella	OG	-0.169855	0.420692	-0.560922	increase
	RF39	CG	-0.15267	-0.042088	0.0561173	decrease
	Lachnospiraceae NK4B4 group	CG	0.148541	-0.0553687	0.0738249	decrease
	Erysipelatoclostridium	CG	0.144331	-0.0347637	0.0463516	decrease
	[Ruminococcaceae] DTU089	CG	0.136753	-0.342774	0.457032	decrease
	[Oscillospiraceae] NK4A214 group	OG	-0.13405	0.0674175	-0.08989	increase
	Christensenellaceae R-7 group	CG	0.120726	-0.307759	0.410345	decrease
	[Oscillospiraceae] UCG-005	OG	-0.110775	0.0233567	-0.0311423	increase
	Alistipes	OG	-0.109539	0.163539	-0.218053	increase
	[Anaerovoracaceae] Family XIII UCG-001	CG	0.100634	-0.208538	0.278051	decrease
	[Barnesiellaceae] uncultured	OG	-0.0999258	0.045143	-0.0601907	increase
	Asteroleplasma	OG	-0.0903524	0.223693	-0.298258	increase
	Eubacterium hallii group	CG	0.0799921	-0.00413735	0.00551647	decrease
	Lachnospiraceae UCG-001	CG	0.0778962	-0.216162	0.288216	decrease
	Lactococcus	CG	0.0768149	-0.246529	0.328706	decrease
	[Erysipelotrichaceae] uncultured	OG	-0.0610587	0.219606	-0.292808	increase
	Lachnospiraceae ND3007 group	CG	0.0568936	-0.113622	0.151497	decrease
	Odoribacter	OG	-0.0530522	0.200082	-0.266776	increase
	Flavonifractor	OG	-0.0478008	0.0459024	-0.0612032	increase
	Dialister	CG	-0.0450975	-0.0270475	0.0360633	decrease
	Sellimonas	CG	0.0310979	-0.126964	0.169285	decrease
	Prevotellaceae UCG-001	CG	0.0265426	-0.124466	0.165954	decrease
	Eisenbergiella	CG	0.023372	-0.314179	0.418905	decrease
	[Puniceicoccaceae] uncultured	OG	-0.0208469	0.182333	-0.24311	increase
	[Oscillospiraceae] UCG-002	OG	-0.0154298	0.183303	-0.244405	increase
	Gastranaerophilales	CG	0.0145339	-0.0399741	0.0532988	decrease
	Paludicola	CG	0.00985736	-0.0618786	0.0825048	decrease
	Colidextribacter	OG	-0.0071145	0.15793	-0.210573	increase
	Eubacterium ventriosum group	OG	0.00243214	0.0734223	-0.0978964	increase

## Sheet: Supplementary Table S3-3
Component	Selected feature	Pathway description	Group contribution assigned by the model	Importance	OG	CG	Change in OG compared with CG
1
	ko04973	Carbohydrate digestion and absorption	CG	0.608503	-0.418572	0.558096	decrease
	ko00627	Aminobenzoate degradation	OG	-0.599591	0.416722	-0.55563	increase
	ko00450	Selenocompound metabolism	OG	-0.304619	0.355484	-0.473979	increase
	ko00626	Naphthalene degradation	CG	0.185418	-0.330738	0.440983	decrease
	ko02060	Phosphotransferase system (PTS)	OG	-0.178388	0.329278	-0.439037	increase
	ko00401	Novobiocin biosynthesis	OG	-0.168208	0.327165	-0.436219	increase
	ko04011	MAPK signaling pathway - yeast	OG	-0.167563	0.327031	-0.436041	increase
	ko00643	Styrene degradation	OG	-0.165829	0.326671	-0.435561	increase
	ko00072	Synthesis and degradation of ketone bodies	OG	-0.136753	0.320634	-0.427512	increase
	ko00920	Sulfur metabolism	OG	-0.0929944	0.31155	-0.4154	increase
2
	ko00410	beta-Alanine metabolism	CG	-0.783238	-0.0119859	0.0159811	decrease
	ko00630	Glyoxylate and dicarboxylate metabolism	CG	-0.54357	-0.157821	0.210427	decrease
	ko00040	Pentose and glucuronate interconversions	CG	-0.207236	-0.138686	0.184915	decrease
	ko00310	Lysine degradation	OG	-0.191584	0.124357	-0.16581	increase
	ko00330	Arginine and proline metabolism	OG	-0.106856	0.0802048	-0.10694	increase

## Sheet: Supplementary Table S3-4
Component	Selected feature: biochemical name	Super pathway	Sub-pathway	Group contribution assigned by the model	Importance	OG	CG	Change in OG compared with CG
1
	2-acetamidophenol sulfate	Xenobiotics	Food Component/Plant	OG	-0.362428	0.686054	-0.777528	increase
	2-aminophenol sulfate	Xenobiotics	Food Component/Plant	OG	-0.342377	0.673874	-0.763724	increase
	4-vinylphenol sulfate	Xenobiotics	Benzoate Metabolism	OG	-0.290427	0.642317	-0.727959	increase
	5-hydroxyindole sulfate	Amino Acid	Tryptophan Metabolism	OG	-0.26746	0.628365	-0.712147	increase
	4-hydroxyhippurate	Xenobiotics	Benzoate Metabolism	OG	-0.258702	0.623045	-0.706117	increase
	vanilloylglycine	Xenobiotics	Food Component/Plant	OG	-0.20791	0.592191	-0.67115	increase
	2-hydroxydecanoate	Lipid	Fatty Acid, Monohydroxy	OG	-0.190647	0.581705	-0.659265	increase
	2-hydroxyhippurate (salicylurate)	Xenobiotics	Benzoate Metabolism	OG	-0.173466	0.571268	-0.647437	increase
	2-aminoheptanoate	Lipid	Fatty Acid, Amino	OG	-0.108461	0.53178	-0.602684	increase
	1-oleyl-GPC (O-18:1)*	Lipid	Lysoplasmalogen	OG	-0.102211	0.527983	-0.598381	increase
	I-urobilinogen	Cofactors and Vitamins	Hemoglobin and Porphyrin Metabolism	OG	-0.0721769	0.509739	-0.577704	increase
	2-methoxyhydroquinone sulfate (1)	Xenobiotics	Benzoate Metabolism	OG	-0.0111011	0.472638	-0.535656	increase
	3-methoxycatechol sulfate (2)	Xenobiotics	Benzoate Metabolism	OG	-0.0108825	0.472505	-0.535506	increase
	sulfate of piperine metabolite C16H19NO3 (3)*	Xenobiotics	Food Component/Plant	CG	0.000137055	-0.465978	0.528108	decrease
	5-hydroxymethyl-2-furoylcarnitine*	Xenobiotics	Food Component/Plant	CG	0.00276223	-0.467572	0.529915	decrease
	methyl-4-hydroxybenzoate sulfate	Xenobiotics	Benzoate Metabolism	CG	0.0112471	-0.472726	0.535757	decrease
	tiglylcarnitine (C5:1-DC)	Amino Acid	Leucine, Isoleucine and Valine Metabolism	CG	0.0114701	-0.472862	0.53591	decrease
	N-(2-furoyl)glycine	Xenobiotics	Food Component/Plant	CG	0.0329284	-0.485897	0.550683	decrease
	phytanate	Xenobiotics	Food Component/Plant	CG	0.0330319	-0.48596	0.550754	decrease
	(2,4 or 2,5)-dimethylphenol sulfate	Xenobiotics	Food Component/Plant	CG	0.0676771	-0.507005	0.574606	decrease
	2S,3R-dihydroxybutyrate	Lipid	Fatty Acid, Dihydroxy	CG	0.073048	-0.510268	0.578304	decrease
	ethyl alpha-glucopyranoside	Xenobiotics	Food Component/Plant	CG	0.107624	-0.531271	0.602108	decrease
	galactonate	Carbohydrate	Fructose, Mannose and Galactose Metabolism	CG	0.126316	-0.542626	0.614976	decrease
	pentose acid*	Partially Characterized Molecules	Partially Characterized Molecules	CG	0.140014	-0.550947	0.624406	decrease
	N-acetyl-3-methylhistidine*	Amino Acid	Histidine Metabolism	CG	0.186677	-0.579293	0.656532	decrease
	behenoylcarnitine (C22)*	Lipid	Fatty Acid Metabolism (Acyl Carnitine, Long Chain Saturated)	CG	0.20099	-0.587987	0.666386	decrease
	3-methylhistidine	Amino Acid	Histidine Metabolism	CG	0.217992	-0.598316	0.678091	decrease
	arabonate/xylonate	Carbohydrate	Pentose Metabolism	CG	0.23324	-0.607578	0.688588	decrease
	pyrraline	Xenobiotics	Food Component/Plant	CG	0.258323	-0.622815	0.705857	decrease
	homostachydrine*	Xenobiotics	Food Component/Plant	CG	0.296465	-0.645985	0.732116	decrease
2
	gamma-glutamylvaline	Peptide	Gamma-glutamyl Amino Acid	CG	-0.339533	-0.0758697	0.0859857	decrease
	N-acetylglucosaminylasparagine	Carbohydrate	Aminosugar Metabolism	OG	-0.214329	0.0429582	-0.048686	increase
	3-hydroxyadipate	Lipid	Fatty Acid, Dicarboxylate	OG	-0.213407	0.234703	-0.265997	increase
	retinol (vitamin A)	Cofactors and Vitamins	Vitamin A Metabolism	OG	-0.211402	0.123072	-0.139481	increase
	suberoylcarnitine (C8-DC)	Lipid	Fatty Acid Metabolism (Acyl Carnitine, Dicarboxylate)	CG	-0.199621	-0.0641755	0.0727323	decrease
	alpha-hydroxyisocaproate	Amino Acid	Leucine, Isoleucine and Valine Metabolism	OG	-0.186318	0.0546334	-0.0619178	increase
	dodecanedioate (C12-DC)	Lipid	Fatty Acid, Dicarboxylate	OG	-0.180209	0.00658991	-0.00746856	increase
	1-pentadecanoyl-2-docosahexaenoyl-GPC (15:0/22:6)*	Lipid	Phosphatidylcholine (PC)	CG	-0.166187	-0.0162402	0.0184055	decrease
	octadecanedioylcarnitine (C18-DC)*	Lipid	Fatty Acid Metabolism (Acyl Carnitine, Dicarboxylate)	OG	-0.163028	0.0990212	-0.112224	increase
	stearamide (18:0)	Lipid	Fatty Acid, Amide	OG	-0.161353	0.0929882	-0.105387	increase
	sphingomyelin (d17:2/16:0, d18:2/15:0)*	Lipid	Sphingomyelins	OG	-0.151034	0.103778	-0.117615	increase
	butyrate/isobutyrate (4:0)	Lipid	Short Chain Fatty Acid	OG	-0.149901	0.374364	-0.424279	increase
	creatinine	Amino Acid	Creatine Metabolism	CG	-0.146823	-0.0342248	0.0387881	decrease
	docosahexaenoylcarnitine (C22:6)*	Lipid	Fatty Acid Metabolism (Acyl Carnitine, Polyunsaturated)	CG	-0.138708	-0.129044	0.14625	decrease
	sphingomyelin (d18:2/23:1)*	Lipid	Sphingomyelins	OG	-0.137787	0.00898186	-0.0101794	increase
	glycosyl ceramide (d18:2/24:1, d18:1/24:2)*	Lipid	Hexosylceramides (HCER)	OG	-0.135511	0.0229482	-0.026008	increase
	gamma-glutamylisoleucine*	Peptide	Gamma-glutamyl Amino Acid	CG	-0.128542	-0.101875	0.115458	decrease
	3-hydroxybutyroylglycine**	Lipid	Fatty Acid Metabolism (Acyl Glycine)	OG	-0.125608	0.247382	-0.280367	increase
	adipoylcarnitine (C6-DC)	Lipid	Fatty Acid Metabolism (Acyl Carnitine, Dicarboxylate)	CG	-0.122104	-0.133174	0.150931	decrease
	gamma-glutamyl-alpha-lysine	Peptide	Gamma-glutamyl Amino Acid	OG	-0.121363	0.0253462	-0.0287257	increase
	kynurenate	Amino Acid	Tryptophan Metabolism	OG	-0.114568	0.173918	-0.197107	increase
	phenylalanylhydroxyproline*	Peptide	Dipeptide	OG	-0.108188	0.165979	-0.188109	increase
	myristoylcarnitine (C14)	Lipid	Fatty Acid Metabolism (Acyl Carnitine, Long Chain Saturated)	CG	-0.107396	-0.0425257	0.0481958	decrease
	sphingomyelin (d18:2/21:0, d16:2/23:0)*	Lipid	Sphingomyelins	CG	-0.104817	-0.0629904	0.0713891	decrease
	ascorbic acid 2-sulfate	Cofactors and Vitamins	Ascorbate and Aldarate Metabolism	OG	-0.102349	0.0985297	-0.111667	increase
	N-acetylserine	Amino Acid	Glycine, Serine and Threonine Metabolism	CG	-0.100569	-0.0911623	0.103317	decrease
	N-acetylalanine	Amino Acid	Alanine and Aspartate Metabolism	CG	-0.0879712	-0.254244	0.288143	decrease
	succinoyltaurine	Amino Acid	Methionine, Cysteine, SAM and Taurine Metabolism	OG	-0.0876918	0.162786	-0.184491	increase
	malonylcarnitine	Lipid	Fatty Acid Synthesis	CG	-0.0876189	-0.0458797	0.051997	decrease
	gamma-glutamylleucine	Peptide	Gamma-glutamyl Amino Acid	CG	-0.0858302	-0.0226859	0.0257107	decrease
	(R)-3-hydroxybutyrylcarnitine	Lipid	Fatty Acid Metabolism (Acyl Carnitine, Hydroxy)	CG	-0.0857463	-0.107644	0.121996	decrease
	5alpha-androstan-3alpha,17beta-diol monosulfate (2)	Lipid	Androgenic Steroids	CG	-0.084743	-0.0351829	0.0398739	decrease
	sphingomyelin (d18:1/20:2, d18:2/20:1, d16:1/22:2)*	Lipid	Sphingomyelins	CG	-0.0842105	-0.0312575	0.0354251	decrease
	sphingomyelin (d18:2/23:0, d18:1/23:1, d17:1/24:1)*	Lipid	Sphingomyelins	CG	-0.0826455	-0.0273894	0.0310413	decrease
	3-methylglutaconate	Amino Acid	Leucine, Isoleucine and Valine Metabolism	CG	-0.080498	-0.112671	0.127694	decrease
	5-methylthioadenosine (MTA)	Amino Acid	Polyamine Metabolism	OG	-0.0797396	0.265744	-0.301176	increase
	N-acetylglycine	Amino Acid	Glycine, Serine and Threonine Metabolism	OG	-0.0784253	0.11782	-0.13353	increase
	hydroxyasparagine**	Amino Acid	Alanine and Aspartate Metabolism	OG	-0.077272	0.136783	-0.15502	increase
	1-palmitoyl-GPA (16:0)	Lipid	Lysophospholipid	OG	-0.0761162	0.0570679	-0.064677	increase
	4-methylhexanoylglutamine	Lipid	Fatty Acid Metabolism (Acyl Glutamine)	CG	-0.0735975	-0.127359	0.14434	decrease
	2-hydroxybutyrate/2-hydroxyisobutyrate	Amino Acid	Glutathione Metabolism	CG	-0.073519	-0.255708	0.289802	decrease
	1-(1-enyl-stearoyl)-2-docosahexaenoyl-GPC (P-18:0/22:6)*	Lipid	Plasmalogen	OG	-0.064947	0.187559	-0.212567	increase
	tricosanoyl sphingomyelin (d18:1/23:0)*	Lipid	Sphingomyelins	CG	-0.0634116	-0.115367	0.13075	decrease
	deoxycarnitine	Lipid	Carnitine Metabolism	CG	-0.0581557	-0.414104	0.469318	decrease
	glucuronate	Carbohydrate	Aminosugar Metabolism	CG	-0.0546028	-0.00222459	0.0025212	decrease
	1-linoleoyl-GPI (18:2)*	Lipid	Lysophospholipid	OG	-0.0537368	0.147251	-0.166884	increase
	octadecenedioylcarnitine (C18:1-DC)*	Lipid	Fatty Acid Metabolism (Acyl Carnitine, Dicarboxylate)	OG	-0.053567	0.122795	-0.139167	increase
	2'-O-methyluridine	Nucleotide	Pyrimidine Metabolism, Uracil containing	OG	-0.0524927	0.0996246	-0.112908	increase
	1-methylnicotinamide	Cofactors and Vitamins	Nicotinate and Nicotinamide Metabolism	CG	-0.0504584	-0.334608	0.379222	decrease
	1-docosahexaenoylglycerol (22:6)	Lipid	Monoacylglycerol	OG	-0.0494008	0.131991	-0.14959	increase
	(N(1) + N(8))-acetylspermidine	Amino Acid	Polyamine Metabolism	OG	-0.0492569	0.169712	-0.19234	increase
	3-aminoisobutyrate	Nucleotide	Pyrimidine Metabolism, Thymine containing	CG	-0.0444413	-0.253084	0.286828	decrease
	margaroylcarnitine (C17)*	Lipid	Fatty Acid Metabolism (Acyl Carnitine, Long Chain Saturated)	CG	-0.0423969	-0.112356	0.127337	decrease
	3-hydroxydecanoylcarnitine	Lipid	Fatty Acid Metabolism (Acyl Carnitine, Hydroxy)	CG	-0.0370367	-0.196835	0.22308	decrease
	taurochenodeoxycholic acid 3-sulfate	Lipid	Secondary Bile Acid Metabolism	CG	-0.0345142	-0.0696705	0.0789599	decrease
	sphingomyelin (d18:1/22:2, d18:2/22:1, d16:1/24:2)*	Lipid	Sphingomyelins	OG	-0.0333814	0.00230968	-0.00261764	increase
	N,N,N-trimethyl-5-aminovalerate	Amino Acid	Lysine Metabolism	CG	-0.0330818	-0.33321	0.377638	decrease
	1-arachidonoyl-GPI (20:4)*	Lipid	Lysophospholipid	OG	-0.0328136	0.136701	-0.154927	increase
	urea	Amino Acid	Urea cycle; Arginine and Proline Metabolism	CG	-0.0320593	-0.238784	0.270622	decrease
	acetylcarnitine (C2)	Lipid	Fatty Acid Metabolism (Acyl Carnitine, Short Chain)	CG	-0.0316135	-0.176435	0.19996	decrease
	nicotinamide	Cofactors and Vitamins	Nicotinate and Nicotinamide Metabolism	CG	-0.0266942	-0.140758	0.159526	decrease
	fibrinopeptide B (1-13)**	Peptide	Fibrinogen Cleavage Peptide	CG	-0.023966	-0.0142985	0.016205	decrease
	glutamine conjugate of C6H10O2 (2)*	Partially Characterized Molecules	Partially Characterized Molecules	CG	-0.0226065	-0.125747	0.142513	decrease
	3-methyl-2-oxobutyrate	Amino Acid	Leucine, Isoleucine and Valine Metabolism	OG	-0.0212896	0.335879	-0.380663	increase
	gamma-glutamylphenylalanine	Peptide	Gamma-glutamyl Amino Acid	OG	-0.0195506	0.206048	-0.233521	increase
	1-pentadecanoyl-2-arachidonoyl-GPC (15:0/20:4)*	Lipid	Phosphatidylcholine (PC)	CG	-0.0187037	-0.300025	0.340028	decrease
	1-stearoyl-2-dihomo-linolenoyl-GPI (18:0/20:3n3 or 6)*	Lipid	Phosphatidylinositol (PI)	OG	-0.0174829	0.296466	-0.335995	increase
	lignoceroyl sphingomyelin (d18:1/24:0)	Lipid	Sphingomyelins	CG	-0.0170713	-0.217212	0.246174	decrease
	laurylcarnitine (C12)	Lipid	Fatty Acid Metabolism (Acyl Carnitine, Medium Chain)	CG	-0.0162759	-0.1449	0.164221	decrease
	citrate	Energy	TCA Cycle	CG	-0.0147567	-0.00487247	0.00552214	decrease
	gluconate	Xenobiotics	Food Component/Plant	OG	-0.0144579	0.15931	-0.180551	increase
	8-methoxykynurenate	Amino Acid	Tryptophan Metabolism	OG	-0.0127745	0.303873	-0.34439	increase
	glycosyl ceramide (d18:1/23:1, d17:1/24:1)*	Lipid	Hexosylceramides (HCER)	CG	-0.0126781	-0.0872241	0.098854	decrease
	palmitoylcarnitine (C16)	Lipid	Fatty Acid Metabolism (Acyl Carnitine, Long Chain Saturated)	OG	-0.00974404	0.109393	-0.123979	increase
	hexanoylglutamine	Lipid	Fatty Acid Metabolism (Acyl Glutamine)	CG	-0.00852851	-0.142796	0.161835	decrease
	3-hydroxybutyrate (BHBA)	Lipid	Ketone Bodies	CG	-0.00581048	-0.0501403	0.0568257	decrease
	serine	Amino Acid	Glycine, Serine and Threonine Metabolism	OG	-0.00263771	0.196021	-0.222157	increase
	heptadecenamide (17:1)*	Lipid	Fatty Acid, Amide	CG	-0.00229035	-0.102511	0.116179	decrease
	acetoacetate	Lipid	Ketone Bodies	CG	-0.0021949	-0.0320166	0.0362855	decrease
	5,6-dihydrouracil	Nucleotide	Pyrimidine Metabolism, Uracil containing	OG	-0.00193836	0.257347	-0.29166	increase
	3-hydroxyhexanoate	Lipid	Fatty Acid, Monohydroxy	CG	-0.00184073	-0.194232	0.220129	decrease
	2S,3R-dihydroxybutyrate	Lipid	Fatty Acid, Dihydroxy	CG	-0.00173383	-0.510268	0.578304	decrease
	2-arachidonoyl-GPE (20:4)*	Lipid	Lysophospholipid	OG	0.0181277	0.183022	-0.207425	increase
	3-hydroxyhippurate sulfate	Xenobiotics	Benzoate Metabolism	OG	0.0379359	0.0661128	-0.0749278	increase
	3-acetylphenol sulfate	Xenobiotics	Chemical	CG	0.0404486	-0.174921	0.198244	decrease
	2-stearoyl-GPE (18:0)*	Lipid	Lysophospholipid	OG	0.0412236	0.0329012	-0.037288	increase
	2-hydroxyarachidate*	Lipid	Fatty Acid, Monohydroxy	CG	0.0582435	-0.246691	0.279583	decrease
	1-palmitoyl-2-gamma-linolenoyl-GPC (16:0/18:3n6)*	Lipid	Phosphatidylcholine (PC)	OG	0.0898438	0.240813	-0.272921	increase
	2-hydroxybehenate	Lipid	Fatty Acid, Monohydroxy	CG	0.092551	-0.221743	0.251309	decrease
	4-acetylphenol sulfate	Xenobiotics	Benzoate Metabolism	CG	0.0938265	-0.252568	0.286244	decrease
	androstenediol (3alpha, 17alpha) monosulfate (3)	Lipid	Androgenic Steroids	CG	0.0976331	-0.338725	0.383888	decrease
	3-phenylpropionate (hydrocinnamate)	Xenobiotics	Benzoate Metabolism	CG	0.117876	-0.180678	0.204769	decrease
	3-(3-hydroxyphenyl)propionate sulfate	Xenobiotics	Benzoate Metabolism	OG	0.168104	0.0316953	-0.0359213	increase
	3-hydroxyhippurate	Xenobiotics	Benzoate Metabolism	CG	0.186582	-0.024946	0.0282721	decrease
	indolepropionate	Amino Acid	Tryptophan Metabolism	CG	0.200083	-0.298237	0.338002	decrease

## Sheet: Supplementary Table S3-5
Component	Selected feature: biochemical name	Super pathway	Sub-pathway	Group contribution assigned by the model	Importance	OG	CG	Change in OG compared with CG
1
	indolepropionate	Amino Acid	Tryptophan Metabolism	CG	-0.238771	-0.602958	0.803943	decrease
	3-hydroxyphenylacetate	Amino Acid	Phenylalanine Metabolism	CG	-0.213833	-0.580496	0.773995	decrease
	agmatine	Amino Acid	Polyamine Metabolism	CG	-0.213272	-0.57999	0.77332	decrease
	N-acetyltryptophan	Amino Acid	Tryptophan Metabolism	CG	-0.210869	-0.577827	0.770436	decrease
	2-oxo-1-pyrrolidinepropionate	Xenobiotics	Chemical	CG	-0.208696	-0.57587	0.767826	decrease
	isocaproate (i6:0)	Lipid	Fatty Acid, Branched	CG	-0.191827	-0.560676	0.747568	decrease
	homostachydrine*	Xenobiotics	Food Component/Plant	CG	-0.190673	-0.559636	0.746181	decrease
	branched chain 14:0 dicarboxylic acid**	Lipid	Fatty Acid, Dicarboxylate	CG	-0.18946	-0.558544	0.744725	decrease
	1-margaroyl-GPE (17:0)*	Lipid	Lysophospholipid	CG	-0.152627	-0.525368	0.700491	decrease
	1-(1-enyl-palmitoyl)-GPE (P-16:0)*	Lipid	Lysoplasmalogen	CG	-0.139368	-0.513426	0.684568	decrease
	1-palmitoyl-GPE (16:0)	Lipid	Lysophospholipid	CG	-0.135747	-0.510164	0.680219	decrease
	3-ketosphinganine	Lipid	Sphingolipid Synthesis	CG	-0.135266	-0.509731	0.679642	decrease
	1-palmitoyl-2-palmitoleoyl-GPE (16:0/16:1)*	Lipid	Phosphatidylethanolamine (PE)	CG	-0.129218	-0.504284	0.672378	decrease
	1-myristoyl-GPE (14:0)	Lipid	Lysophospholipid	CG	-0.126431	-0.501774	0.669032	decrease
	N-acetyltyrosine	Amino Acid	Tyrosine Metabolism	CG	-0.125627	-0.50105	0.668067	decrease
	spermidine	Amino Acid	Polyamine Metabolism	CG	-0.123518	-0.49915	0.665533	decrease
	carotene diol (2)	Cofactors and Vitamins	Vitamin A Metabolism	CG	-0.119396	-0.495438	0.660584	decrease
	cyclo(pro-tyr)	Peptide	Dipeptide	CG	-0.107894	-0.485078	0.64677	decrease
	maltotriose	Carbohydrate	Glycogen Metabolism	CG	-0.100598	-0.478506	0.638008	decrease
	1,3-dimethylurate	Xenobiotics	Xanthine Metabolism	CG	-0.0997341	-0.477728	0.636971	decrease
	1-methyl-5-imidazolelactate	Amino Acid	Histidine Metabolism	CG	-0.098477	-0.476596	0.635461	decrease
	anserine	Amino Acid	Histidine Metabolism	CG	-0.0971492	-0.4754	0.633867	decrease
	alpha-tocopherol	Cofactors and Vitamins	Tocopherol Metabolism	CG	-0.0964851	-0.474802	0.633069	decrease
	thymidine	Nucleotide	Pyrimidine Metabolism, Thymine containing	CG	-0.0901676	-0.469112	0.625482	decrease
	glycerophosphoserine*	Lipid	Phospholipid Metabolism	CG	-0.0856038	-0.465001	0.620002	decrease
	N-carbamoylputrescine	Amino Acid	Polyamine Metabolism	CG	-0.0818492	-0.461619	0.615493	decrease
	2'-deoxyuridine	Nucleotide	Pyrimidine Metabolism, Uracil containing	CG	-0.0718282	-0.452594	0.603458	decrease
	glycerophosphoethanolamine	Lipid	Phospholipid Metabolism	CG	-0.0715866	-0.452376	0.603168	decrease
	3-carboxy-4-methyl-5-pentyl-2-furanpropionate (3-CMPFP)**	Lipid	Fatty Acid, Dicarboxylate	CG	-0.0669387	-0.44819	0.597586	decrease
	1-methyl-5-imidazoleacetate	Amino Acid	Histidine Metabolism	CG	-0.0572131	-0.43943	0.585907	decrease
	5-methyluridine (ribothymidine)	Nucleotide	Pyrimidine Metabolism, Uracil containing	CG	-0.0546934	-0.43716	0.582881	decrease
	pyrraline	Xenobiotics	Food Component/Plant	CG	-0.0541271	-0.43665	0.582201	decrease
	3-hydroxyphenylacetate sulfate	Amino Acid	Tyrosine Metabolism	CG	-0.051367	-0.434164	0.578886	decrease
	2'-deoxyinosine	Nucleotide	Purine Metabolism, (Hypo)Xanthine/Inosine containing	CG	-0.0473929	-0.430585	0.574113	decrease
	enterolactone sulfate	Xenobiotics	Food Component/Plant	CG	-0.0466086	-0.429879	0.573171	decrease
	astaxanthin	Cofactors and Vitamins	Vitamin A Metabolism	CG	-0.0430531	-0.426676	0.568902	decrease
	3-methylhistidine	Amino Acid	Histidine Metabolism	CG	-0.0427942	-0.426443	0.568591	decrease
	carotene diol (1)	Cofactors and Vitamins	Vitamin A Metabolism	CG	-0.0376982	-0.421853	0.562471	decrease
	1,3,7-trimethylurate	Xenobiotics	Xanthine Metabolism	CG	-0.0362226	-0.420524	0.560699	decrease
	caproate (6:0)	Lipid	Medium Chain Fatty Acid	CG	-0.0350439	-0.419462	0.559283	decrease
	3-hydroxystachydrine*	Xenobiotics	Food Component/Plant	CG	-0.0313324	-0.416119	0.554826	decrease
	phenylacetylaspartate	Peptide	Acetylated Peptides	CG	-0.0312552	-0.41605	0.554733	decrease
	4-hydroxycyclohexylcarboxylic acid	Xenobiotics	Food Component/Plant	CG	-0.0311888	-0.41599	0.554654	decrease
	3-indoleglyoxylic acid	Xenobiotics	Food Component/Plant	CG	-0.0307685	-0.415612	0.554149	decrease
	N-acetylpyrraline	Xenobiotics	Food Component/Plant	CG	-0.0271771	-0.412377	0.549836	decrease
	1-stearoyl-GPE (18:0)	Lipid	Lysophospholipid	CG	-0.025072	-0.410481	0.547308	decrease
	2-hydroxybutyrate/2-hydroxyisobutyrate	Amino Acid	Glutathione Metabolism	CG	-0.0242842	-0.409771	0.546362	decrease
	3-hydroxyhexanoate	Lipid	Fatty Acid, Monohydroxy	CG	-0.0241094	-0.409614	0.546152	decrease
	triethanolamine	Xenobiotics	Chemical	CG	-0.0237472	-0.409287	0.545717	decrease
	arginine	Amino Acid	Urea cycle; Arginine and Proline Metabolism	CG	-0.021335	-0.407115	0.54282	decrease
	4-methyl-2-oxopentanoate	Amino Acid	Leucine, Isoleucine and Valine Metabolism	CG	-0.0152878	-0.401668	0.535558	decrease
	1-palmitoyl-2-linoleoyl-galactosylglycerol (16:0/18:2)*	Lipid	Galactosyl Glycerolipids	CG	-0.0133245	-0.3999	0.5332	decrease
	beta-hydroxyisovalerate	Amino Acid	Leucine, Isoleucine and Valine Metabolism	CG	-0.0122302	-0.398914	0.531886	decrease
	5-methylhexanoate (i7:0)	Lipid	Fatty Acid, Branched	CG	-0.0105704	-0.397419	0.529892	decrease
	10-undecenoate (11:1n1)	Lipid	Medium Chain Fatty Acid	CG	-0.00755218	-0.394701	0.526268	decrease
	butyrate/isobutyrate (4:0)	Lipid	Short Chain Fatty Acid	CG	-0.00418813	-0.391671	0.522228	decrease
	valerate (5:0)	Lipid	Short Chain Fatty Acid	CG	-0.00320618	-0.390786	0.521049	decrease
	diacylglycerol (14:0/18:1, 16:0/16:1) [1]*	Lipid	Diacylglycerol	CG	-0.00295069	-0.390556	0.520742	decrease
	N,N,N-trimethyl-5-aminovalerate	Amino Acid	Lysine Metabolism	CG	-0.00168598	-0.389417	0.519223	decrease
	alpha-ketoglutaramate*	Amino Acid	Glutamate Metabolism	CG	-0.000599067	-0.388438	0.517918	decrease
	isobutyrylglycine	Amino Acid	Leucine, Isoleucine and Valine Metabolism	CG	-0.000323336	-0.38819	0.517587	decrease
	glycochenodeoxycholate	Lipid	Primary Bile Acid Metabolism	CG	-6.91285e-05	-0.387961	0.517281	decrease
	2-hydroxylignocerate*	Lipid	Fatty Acid, Monohydroxy	OG	0.00729955	0.394473	-0.525964	increase
	palmitoyl-oleoyl-glycerol (16:0/18:1) [2]*	Lipid	Diacylglycerol	OG	0.0143125	0.40079	-0.534386	increase
	alanylleucine	Peptide	Dipeptide	OG	0.0181423	0.404239	-0.538986	increase
	2-aminophenol	Xenobiotics	Food Component/Plant	OG	0.0189622	0.404978	-0.53997	increase
	tricarballylate	Energy	TCA Cycle	OG	0.021004	0.406817	-0.542422	increase
	glycylleucine	Peptide	Dipeptide	OG	0.0232386	0.408829	-0.545106	increase
	leucylalanine	Peptide	Dipeptide	OG	0.0272755	0.412465	-0.549954	increase
	4-hydroxyhippurate	Xenobiotics	Benzoate Metabolism	OG	0.0347674	0.419213	-0.558951	increase
	1-palmitoyl-2-linoleoyl-GPI (16:0/18:2)	Lipid	Phosphatidylinositol (PI)	OG	0.0415555	0.425327	-0.567103	increase
	4-acetamidobutanoate	Amino Acid	Polyamine Metabolism	OG	0.0445339	0.42801	-0.57068	increase
	phenylacetyltaurine	Peptide	Acetylated Peptides	OG	0.0558702	0.43822	-0.584294	increase
	1-stearoyl-2-linoleoyl-GPC (18:0/18:2)*	Lipid	Phosphatidylcholine (PC)	OG	0.0595959	0.441576	-0.588768	increase
	gamma-glutamylvaline	Peptide	Gamma-glutamyl Amino Acid	OG	0.0597011	0.441671	-0.588895	increase
	palmitoyl-linoleoyl-glycerol (16:0/18:2) [1]*	Lipid	Diacylglycerol	OG	0.0607626	0.442627	-0.590169	increase
	sphingadienine	Lipid	Sphingolipid Synthesis	OG	0.0734724	0.454075	-0.605433	increase
	linoleoyl ethanolamide	Lipid	Endocannabinoid	OG	0.0760577	0.456403	-0.608538	increase
	palmitoyl ethanolamide	Lipid	Endocannabinoid	OG	0.0861413	0.465485	-0.620647	increase
	3-hydroxypalmitate	Lipid	Fatty Acid, Monohydroxy	OG	0.0890893	0.468141	-0.624187	increase
	adenosine 5'-monophosphate (AMP)	Nucleotide	Purine Metabolism, Adenine containing	OG	0.0954284	0.47385	-0.6318	increase
	carboxysuccinate	Energy	TCA Cycle	OG	0.0989522	0.477024	-0.636032	increase
	1-oleoyl-2-linoleoyl-GPC (18:1/18:2)*	Lipid	Phosphatidylcholine (PC)	OG	0.112541	0.489263	-0.652351	increase
	LAHSA (18:2/OH-18:0)*	Lipid	Fatty Acid Hydroxyl Fatty Acid	OG	0.129373	0.504424	-0.672565	increase
	oleoyl ethanolamide	Lipid	Endocannabinoid	OG	0.130329	0.505285	-0.673713	increase
	N-palmitoylglycine	Lipid	Fatty Acid Metabolism (Acyl Glycine)	OG	0.151076	0.523971	-0.698628	increase
	phosphate	Energy	Oxidative Phosphorylation	OG	0.159794	0.531824	-0.709098	increase
	9,10-DiHOME	Lipid	Fatty Acid, Dihydroxy	OG	0.165515	0.536976	-0.715968	increase
	heptenedioate (C7:1-DC)*	Lipid	Fatty Acid, Dicarboxylate	OG	0.185681	0.555139	-0.740186	increase
	pyridoxate	Cofactors and Vitamins	Vitamin B6 Metabolism	OG	0.195934	0.564375	-0.7525	increase
	8-methoxykynurenate	Amino Acid	Tryptophan Metabolism	OG	0.3258	0.681344	-0.908458	increase
2
	malonylcarnitine	Lipid	Fatty Acid Synthesis	CG	-0.0959494	-0.200389	0.267185	decrease
	2-methylmalonylcarnitine (C4-DC)	Lipid	Fatty Acid Metabolism (also BCAA Metabolism)	OG	-0.0930475	0.100332	-0.133775	increase
	nervonoylcarnitine (C24:1)*	Lipid	Fatty Acid Metabolism (Acyl Carnitine, Monounsaturated)	OG	-0.0926937	0.159412	-0.21255	increase
	ceramide (d18:2/24:1, d18:1/24:2)*	Lipid	Ceramides	OG	-0.0857229	0.0790149	-0.105353	increase
	hyocholate	Lipid	Secondary Bile Acid Metabolism	CG	-0.0844526	-0.00794545	0.0105939	decrease
	2-acetamidobutanoate	Xenobiotics	Bacterial/Fungal	OG	-0.0798873	0.183112	-0.244149	increase
	5-hydroxylysine	Amino Acid	Lysine Metabolism	OG	-0.0794652	0.0042114	-0.0056152	increase
	N-formylmethionine	Amino Acid	Methionine, Cysteine, SAM and Taurine Metabolism	CG	-0.0789296	-0.2934	0.3912	decrease
	1-stearoyl-2-oleoyl-GPC (18:0/18:1)	Lipid	Phosphatidylcholine (PC)	CG	-0.0788826	-0.0200695	0.0267594	decrease
	biliverdin	Cofactors and Vitamins	Hemoglobin and Porphyrin Metabolism	CG	-0.078451	-0.114066	0.152088	decrease
	5-acetylamino-6-amino-3-methyluracil	Xenobiotics	Xanthine Metabolism	CG	-0.0778275	-0.0290893	0.0387858	decrease
	deoxycholic acid 3-sulfate	Lipid	Secondary Bile Acid Metabolism	CG	-0.0773732	-0.112466	0.149954	decrease
	margaroylcarnitine (C17)*	Lipid	Fatty Acid Metabolism (Acyl Carnitine, Long Chain Saturated)	OG	-0.0772469	0.0737768	-0.0983691	increase
	erucoylcarnitine (C22:1)*	Lipid	Fatty Acid Metabolism (Acyl Carnitine, Monounsaturated)	OG	-0.0768449	0.0282477	-0.0376636	increase
	3-dehydrodeoxycholate	Lipid	Secondary Bile Acid Metabolism	OG	-0.0761726	0.144755	-0.193007	increase
	ursocholate	Lipid	Secondary Bile Acid Metabolism	OG	-0.0759801	0.0458103	-0.0610804	increase
	6-hydroxynicotinate	Cofactors and Vitamins	Nicotinate and Nicotinamide Metabolism	OG	-0.0750465	0.150067	-0.200089	increase
	androstenediol (3beta,17beta) disulfate (1)	Lipid	Androgenic Steroids	OG	-0.0723511	0.00434488	-0.00579318	increase
	3-carboxy-4-methyl-5-pentyl-2-furanpropionate (3-CMPFP)**	Lipid	Fatty Acid, Dicarboxylate	CG	-0.0723034	-0.44819	0.597586	decrease
	(3'-5')-guanylyladenosine*	Nucleotide	Dinucleotide	CG	-0.0719294	-0.0467546	0.0623395	decrease
	isohyodeoxycholate	Lipid	Secondary Bile Acid Metabolism	CG	-0.0694966	-0.0807537	0.107672	decrease
	tetrahydrocortisol disulfate	Lipid	Corticosteroids	CG	-0.0693332	-0.26974	0.359653	decrease
	N-acetylalanine	Amino Acid	Alanine and Aspartate Metabolism	OG	-0.0686081	0.171052	-0.228069	increase
	creatine	Amino Acid	Creatine Metabolism	OG	-0.0683686	0.289087	-0.38545	increase
	ceramide (d18:1/17:0, d17:1/18:0)*	Lipid	Ceramides	CG	-0.0676714	-0.0863678	0.115157	decrease
	N,N-dimethyl-pro-pro	Peptide	Modified Peptides	CG	-0.0675177	-0.237685	0.316913	decrease
	behenoylcarnitine (C22)*	Lipid	Fatty Acid Metabolism (Acyl Carnitine, Long Chain Saturated)	OG	-0.0657441	0.0692022	-0.0922696	increase
	succinylcarnitine (C4-DC)	Energy	TCA Cycle	CG	-0.0648157	-0.289474	0.385966	decrease
	N-carbamoylsarcosine	Amino Acid	Creatine Metabolism	CG	-0.0647815	-0.180121	0.240162	decrease
	androstenediol (3beta,17beta) disulfate (2)	Lipid	Androgenic Steroids	OG	-0.0647302	0.0194061	-0.0258748	increase
	glyco-beta-muricholate**	Lipid	Primary Bile Acid Metabolism	OG	-0.0642153	0.0536729	-0.0715639	increase
	3-hydroxytridecanoate	Lipid	Fatty Acid, Monohydroxy	CG	-0.064093	-0.0774694	0.103293	decrease
	N-acetyl-S-allyl-cysteine	Xenobiotics	Food Component/Plant	CG	-0.0636907	-0.181991	0.242654	decrease
	linoleoylcarnitine (C18:2)*	Lipid	Fatty Acid Metabolism (Acyl Carnitine, Polyunsaturated)	OG	-0.0635818	0.116527	-0.15537	increase
	carnitine	Lipid	Carnitine Metabolism	OG	-0.0633018	0.150288	-0.200384	increase
	12-ketolithocholate	Lipid	Secondary Bile Acid Metabolism	OG	-0.0632373	0.124781	-0.166375	increase
	sphingomyelin (d17:1/16:0, d18:1/15:0, d16:1/17:0)*	Lipid	Sphingomyelins	OG	-0.0631097	0.361917	-0.482556	increase
	N-stearoyl-sphingosine (d18:1/18:0)*	Lipid	Ceramides	CG	-0.0623704	-0.111435	0.148579	decrease
	16alpha-hydroxy DHEA 3-sulfate	Lipid	Androgenic Steroids	CG	-0.0621302	-0.12852	0.17136	decrease
	1,2-dipalmitoyl-GPC (16:0/16:0)	Lipid	Phosphatidylcholine (PC)	CG	-0.0620023	-0.0852129	0.113617	decrease
	N-carbamoylalanine	Amino Acid	Alanine and Aspartate Metabolism	OG	-0.0618259	0.255545	-0.340726	increase
	bilirubin degradation product, C17H18N2O4 (3)**	Partially Characterized Molecules	Partially Characterized Molecules	CG	-0.0601334	-0.370111	0.493481	decrease
	dopamine	Amino Acid	Tyrosine Metabolism	CG	-0.0600114	-0.239284	0.319045	decrease
	3,4-dihydroxyphenylacetate sulfate	Amino Acid	Tyrosine Metabolism	CG	-0.0594218	-0.247923	0.330564	decrease
	lithocholate sulfate (1)	Lipid	Secondary Bile Acid Metabolism	OG	-0.0591617	0.0624236	-0.0832314	increase
	N-succinyl-isoleucine	Amino Acid	Leucine, Isoleucine and Valine Metabolism	OG	-0.0589566	0.145098	-0.193464	increase
	genistein	Xenobiotics	Food Component/Plant	CG	-0.0586712	-0.0668629	0.0891505	decrease
	1-methylguanidine	Amino Acid	Guanidino and Acetamido Metabolism	CG	-0.0576082	-0.052181	0.0695747	decrease
	cholesterol	Lipid	Sterol	CG	-0.0572171	-0.34484	0.459787	decrease
	estriol 3-sulfate	Lipid	Estrogenic Steroids	CG	-0.0572024	-0.0783913	0.104522	decrease
	bilirubin (Z,Z)	Cofactors and Vitamins	Hemoglobin and Porphyrin Metabolism	CG	-0.0570587	-0.199105	0.265473	decrease
	5alpha-pregnan-3beta,20alpha-diol disulfate	Lipid	Progestin Steroids	CG	-0.0567795	-0.00498477	0.00664636	decrease
	deoxycholate	Lipid	Secondary Bile Acid Metabolism	OG	-0.0567724	0.0884902	-0.117987	increase
	lithocholate	Lipid	Secondary Bile Acid Metabolism	CG	-0.0559287	-0.10563	0.140839	decrease
	androstenediol (3beta,17beta) monosulfate (1)	Lipid	Androgenic Steroids	OG	-0.0556467	0.298882	-0.39851	increase
	alpha-CEHC sulfate	Cofactors and Vitamins	Tocopherol Metabolism	CG	-0.0546144	-0.0605125	0.0806833	decrease
	5alpha-pregnan-3beta,20beta-diol monosulfate (1)	Lipid	Progestin Steroids	CG	-0.0545354	-0.0791662	0.105555	decrease
	beta-cryptoxanthin	Cofactors and Vitamins	Vitamin A Metabolism	CG	-0.054514	-0.345061	0.460081	decrease
	3beta-hydroxy-5-cholenoate	Lipid	Secondary Bile Acid Metabolism	CG	-0.0544397	-0.148833	0.198444	decrease
	dehydrolithocholate	Lipid	Secondary Bile Acid Metabolism	CG	-0.0539011	-0.125568	0.167424	decrease
	sucralose	Xenobiotics	Food Component/Plant	CG	-0.0536233	-0.159914	0.213219	decrease
	succinoyltaurine	Amino Acid	Methionine, Cysteine, SAM and Taurine Metabolism	OG	-0.053601	0.233674	-0.311566	increase
	linolenoylcarnitine (C18:3)*	Lipid	Fatty Acid Metabolism (Acyl Carnitine, Polyunsaturated)	CG	-0.0530097	-0.0202676	0.0270234	decrease
	5-hydroxypicolinic acid	Amino Acid	Tryptophan Metabolism	CG	-0.0529101	-0.377458	0.503277	decrease
	N-acetylproline	Amino Acid	Urea cycle; Arginine and Proline Metabolism	CG	-0.052808	-0.170984	0.227978	decrease
	N-acetylasparagine	Amino Acid	Alanine and Aspartate Metabolism	OG	-0.0524013	0.113634	-0.151512	increase
	glycosyl-N-stearoyl-sphingosine (d18:1/18:0)	Lipid	Hexosylceramides (HCER)	CG	-0.0520199	-0.0676931	0.0902575	decrease
	sebacate (C10-DC)	Lipid	Fatty Acid, Dicarboxylate	CG	-0.0518343	-0.0628942	0.083859	decrease
	lignoceroylcarnitine (C24)*	Lipid	Fatty Acid Metabolism (Acyl Carnitine, Long Chain Saturated)	OG	-0.0514574	0.0489697	-0.0652929	increase
	N-lactoyl leucine	Amino Acid	Lactoyl Amino Acid	CG	-0.0511958	-0.0604032	0.0805376	decrease
	anserine	Amino Acid	Histidine Metabolism	CG	-0.0510836	-0.4754	0.633867	decrease
	N6-carboxyethyllysine	Amino Acid	Lysine Metabolism	OG	-0.0507461	0.227632	-0.303509	increase
	xanthine	Nucleotide	Purine Metabolism, (Hypo)Xanthine/Inosine containing	OG	-0.0505444	0.00768601	-0.010248	increase
	1-stearoyl-GPS (18:0)*	Lipid	Lysophospholipid	CG	-0.0504712	-0.146654	0.195539	decrease
	N6-formyllysine	Amino Acid	Lysine Metabolism	OG	-0.0499645	0.154455	-0.205941	increase
	acetylcarnitine (C2)	Lipid	Fatty Acid Metabolism (Acyl Carnitine, Short Chain)	OG	-0.0495985	0.0791837	-0.105578	increase
	glycerophosphoserine*	Lipid	Phospholipid Metabolism	CG	-0.0491037	-0.465001	0.620002	decrease
	5alpha-pregnan-3beta,20alpha-diol monosulfate (2)	Lipid	Progestin Steroids	OG	-0.0485308	0.0520924	-0.0694565	increase
	arachidoylcarnitine (C20)*	Lipid	Fatty Acid Metabolism (Acyl Carnitine, Long Chain Saturated)	CG	-0.0484426	-0.15071	0.200946	decrease
	saccharopine	Amino Acid	Lysine Metabolism	CG	-0.0483698	-0.0590096	0.0786794	decrease
	2-oxoarginine*	Amino Acid	Urea cycle; Arginine and Proline Metabolism	CG	-0.0481719	-0.114677	0.152903	decrease
	vitamin D3 sulfate	Cofactors and Vitamins	Vitamin D Metabolism	CG	-0.0480535	-0.0510825	0.0681101	decrease
	dehydroepiandrosterone sulfate (DHEA-S)	Lipid	Androgenic Steroids	CG	-0.0477461	-0.087271	0.116361	decrease
	bilirubin (E,Z or Z,E)*	Cofactors and Vitamins	Hemoglobin and Porphyrin Metabolism	CG	-0.0475483	-0.353331	0.471108	decrease
	eicosenoylcarnitine (C20:1)*	Lipid	Fatty Acid Metabolism (Acyl Carnitine, Monounsaturated)	CG	-0.0473213	-0.126072	0.168096	decrease
	1-(1-enyl-stearoyl)-GPE (P-18:0)*	Lipid	Lysoplasmalogen	CG	-0.0472766	-0.114876	0.153168	decrease
	sarcosine	Amino Acid	Glycine, Serine and Threonine Metabolism	OG	-0.0471255	0.232786	-0.310381	increase
	nicotianamine	Xenobiotics	Food Component/Plant	OG	-0.0468833	0.368171	-0.490895	increase
	cysteine sulfinic acid	Amino Acid	Methionine, Cysteine, SAM and Taurine Metabolism	CG	-0.0467644	-0.235052	0.313403	decrease
	urate	Nucleotide	Purine Metabolism, (Hypo)Xanthine/Inosine containing	CG	-0.0464213	-0.0805981	0.107464	decrease
	bilirubin degradation product, C17H18N2O4 (2)**	Partially Characterized Molecules	Partially Characterized Molecules	CG	-0.0459892	-0.370082	0.493443	decrease
	furaneol sulfate	Xenobiotics	Food Component/Plant	CG	-0.0455303	-0.160596	0.214127	decrease
	17alpha-hydroxypregnenolone 3-sulfate	Lipid	Pregnenolone Steroids	CG	-0.0454994	-0.0572328	0.0763104	decrease
	1-palmitoyl-2-oleoyl-GPC (16:0/18:1)	Lipid	Phosphatidylcholine (PC)	OG	-0.0453354	0.228169	-0.304225	increase
	3-carboxy-4-methyl-5-propyl-2-furanpropanoate (CMPF)	Lipid	Fatty Acid, Dicarboxylate	CG	-0.045161	-0.0102612	0.0136816	decrease
	phenethylamine	Amino Acid	Phenylalanine Metabolism	OG	-0.0451341	0.0266536	-0.0355381	increase
	asparagine	Amino Acid	Alanine and Aspartate Metabolism	CG	-0.0450661	-0.175002	0.233336	decrease
	lanosterol	Lipid	Sterol	CG	-0.0447801	-0.235389	0.313852	decrease
	25-hydroxycholesterol sulfate	Lipid	Sterol	CG	-0.0447299	-0.258581	0.344775	decrease
	taurolithocholate 3-sulfate	Lipid	Secondary Bile Acid Metabolism	CG	-0.0447117	-0.0851183	0.113491	decrease
	1-palmitoyl-GPG (16:0)*	Lipid	Lysophospholipid	CG	-0.0445323	-0.0639815	0.0853087	decrease
	bilirubin (E,E)*	Cofactors and Vitamins	Hemoglobin and Porphyrin Metabolism	CG	-0.0439295	-0.244061	0.325415	decrease
	dimethylglycine	Amino Acid	Glycine, Serine and Threonine Metabolism	CG	-0.0438978	-0.255295	0.340394	decrease
	butyrylglutamine/isobutyrylglutamine	Amino Acid	Glutamate Metabolism	OG	-0.0438596	0.0649599	-0.0866132	increase
	diaminopimelate	Xenobiotics	Bacterial/Fungal	OG	-0.04379	0.0705223	-0.0940297	increase
	1-stearoyl-GPC (18:0)	Lipid	Lysophospholipid	CG	-0.0437421	-0.148714	0.198286	decrease
	cholate sulfate	Lipid	Primary Bile Acid Metabolism	CG	-0.043362	-0.28206	0.376081	decrease
	soyasaponin III	Xenobiotics	Food Component/Plant	CG	-0.0433264	-0.141737	0.188982	decrease
	cysteine s-sulfate	Amino Acid	Methionine, Cysteine, SAM and Taurine Metabolism	CG	-0.0431418	-0.108949	0.145266	decrease
	campesterol	Lipid	Sterol	CG	-0.0429963	-0.28035	0.3738	decrease
	isoursodeoxycholate	Lipid	Secondary Bile Acid Metabolism	CG	-0.0429259	-0.0873918	0.116522	decrease
	branched-chain, straight-chain, or cyclopropyl 10:1 fatty acid (1)*	Partially Characterized Molecules	Partially Characterized Molecules	CG	-0.0428851	-0.116157	0.154877	decrease
	isoursodeoxycholate sulfate (1)	Lipid	Secondary Bile Acid Metabolism	CG	-0.0427383	-0.118223	0.15763	decrease
	heptenedioate (C7:1-DC)*	Lipid	Fatty Acid, Dicarboxylate	OG	-0.0426874	0.555139	-0.740186	increase
	chenodeoxycholic acid sulfate (1)	Lipid	Primary Bile Acid Metabolism	OG	-0.0425959	0.0523673	-0.0698231	increase
	2-hydroxy-3-methylvalerate	Amino Acid	Leucine, Isoleucine and Valine Metabolism	CG	-0.0425634	-0.0717767	0.0957022	decrease
	cholesterol sulfate	Lipid	Sterol	CG	-0.042035	-0.291249	0.388332	decrease
	cysteine	Amino Acid	Methionine, Cysteine, SAM and Taurine Metabolism	CG	-0.0413907	-0.0696566	0.0928754	decrease
	bufotenine	Xenobiotics	Food Component/Plant	CG	-0.0413766	-0.11654	0.155387	decrease
	2,3-dihydroxyisovalerate	Xenobiotics	Food Component/Plant	CG	-0.0409991	-0.189749	0.252998	decrease
	(3'-5')-cytidylyladenosine	Nucleotide	Dinucleotide	OG	-0.0409211	0.133082	-0.177442	increase
	1-palmitoyl-GPC (16:0)	Lipid	Lysophospholipid	CG	-0.0405168	-0.100608	0.134143	decrease
	maltotetraose	Carbohydrate	Glycogen Metabolism	CG	-0.0405007	-0.340244	0.453658	decrease
	N-(2-furoyl)glycine	Xenobiotics	Food Component/Plant	CG	-0.0404855	-0.293105	0.390807	decrease
	isovalerylglycine	Amino Acid	Leucine, Isoleucine and Valine Metabolism	CG	-0.0403955	-0.235681	0.314242	decrease
	N-acetylglutamate	Amino Acid	Glutamate Metabolism	CG	-0.0403211	-0.191882	0.255842	decrease
	valerylhistidine*	Peptide	Dipeptide	CG	-0.0401737	-0.0756464	0.100862	decrease
	deoxycarnitine	Lipid	Carnitine Metabolism	OG	-0.0400659	0.244309	-0.325746	increase
	pregnenetriol disulfate*	Lipid	Pregnenolone Steroids	OG	-0.0397236	0.0538926	-0.0718569	increase
	equol	Xenobiotics	Food Component/Plant	CG	-0.0396531	-0.052044	0.0693921	decrease
	isoleucine	Amino Acid	Leucine, Isoleucine and Valine Metabolism	CG	-0.0395915	-0.210846	0.281128	decrease
	N6-acetyllysine	Amino Acid	Lysine Metabolism	CG	-0.0395762	-0.267974	0.357298	decrease
	1-(1-enyl-oleoyl)-GPE (P-18:1)*	Lipid	Lysoplasmalogen	CG	-0.0393045	-0.155917	0.207889	decrease
	1,3,7-trimethylurate	Xenobiotics	Xanthine Metabolism	CG	-0.0391654	-0.420524	0.560699	decrease
	nonenedioate (C9:1-DC)*	Lipid	Fatty Acid, Dicarboxylate	OG	-0.0384585	0.264268	-0.352357	increase
	lactosyl-N-palmitoyl-sphingosine (d18:1/16:0)	Lipid	Lactosylceramides (LCER)	CG	-0.0384423	-0.145535	0.194046	decrease
	tetrahydrocortisone	Lipid	Corticosteroids	OG	-0.0383575	0.280777	-0.374369	increase
	deoxycholic acid 12-sulfate*	Lipid	Secondary Bile Acid Metabolism	CG	-0.038346	-0.0128006	0.0170674	decrease
	suberate (C8-DC)	Lipid	Fatty Acid, Dicarboxylate	OG	-0.0381284	0.219781	-0.293042	increase
	4-hydroxyhippurate	Xenobiotics	Benzoate Metabolism	OG	-0.0381032	0.419213	-0.558951	increase
	S-methylcysteine	Amino Acid	Methionine, Cysteine, SAM and Taurine Metabolism	OG	-0.0379406	0.0651416	-0.0868555	increase
	lithocholic acid sulfate (2)	Lipid	Secondary Bile Acid Metabolism	CG	-0.0378722	-0.260769	0.347692	decrease
	phenylpyruvate	Amino Acid	Phenylalanine Metabolism	CG	-0.0377456	-0.219588	0.292784	decrease
	2,4-dihydroxybutyrate	Lipid	Fatty Acid, Dihydroxy	CG	-0.0373661	-0.100905	0.134539	decrease
	3-hydroxy-3-methylglutarate	Lipid	Mevalonate Metabolism	OG	-0.0373352	0.243099	-0.324132	increase
	picolinate	Amino Acid	Tryptophan Metabolism	CG	-0.0370161	-0.305626	0.407502	decrease
	taurine	Amino Acid	Methionine, Cysteine, SAM and Taurine Metabolism	OG	-0.0370041	0.148174	-0.197566	increase
	1-oleoyl-GPG (18:1)*	Lipid	Lysophospholipid	CG	-0.0368884	-0.149437	0.19925	decrease
	3-methylhistidine	Amino Acid	Histidine Metabolism	CG	-0.0367206	-0.426443	0.568591	decrease
	beta-sitosterol	Lipid	Sterol	OG	-0.0363928	0.0399983	-0.053331	increase
	hydroxy-N6,N6,N6-trimethyllysine*	Amino Acid	Lysine Metabolism	CG	-0.0363743	-0.0579385	0.0772513	decrease
	galacturonate	Xenobiotics	Food Component/Plant	OG	-0.0360794	0.106692	-0.142256	increase
	N-lactoyl valine	Amino Acid	Lactoyl Amino Acid	OG	-0.0360325	0.0698118	-0.0930824	increase
	N-succinyl-leucine	Amino Acid	Leucine, Isoleucine and Valine Metabolism	OG	-0.0357587	0.190411	-0.253882	increase
	biotin	Cofactors and Vitamins	Biotin Metabolism	OG	-0.0357344	0.15326	-0.204347	increase
	methyl glucopyranoside (alpha + beta)	Xenobiotics	Food Component/Plant	CG	-0.0356029	-0.00692694	0.00923592	decrease
	tetrahydrocortisol sulfate (2)	Lipid	Corticosteroids	CG	-0.0354775	-0.0443156	0.0590874	decrease
	(3'-5')-cytidylylcytidine*	Nucleotide	Dinucleotide	OG	-0.0349633	0.0357247	-0.0476329	increase
	pregnenetriol sulfate*	Lipid	Pregnenolone Steroids	OG	-0.0349394	0.0873819	-0.116509	increase
	digalacturonic acid	Xenobiotics	Food Component/Plant	CG	-0.0348518	-0.094627	0.126169	decrease
	N-glycolylneuraminate	Carbohydrate	Aminosugar Metabolism	OG	-0.0347177	0.0772779	-0.103037	increase
	21-hydroxypregnenolone disulfate	Lipid	Pregnenolone Steroids	OG	-0.0345631	0.0895862	-0.119448	increase
	N2,N5-diacetylornithine	Amino Acid	Urea cycle; Arginine and Proline Metabolism	CG	-0.0345114	-0.111005	0.148007	decrease
	glycodeoxycholate 3-sulfate	Lipid	Secondary Bile Acid Metabolism	CG	-0.0344728	-0.165726	0.220968	decrease
	1-methylurate	Xenobiotics	Xanthine Metabolism	CG	-0.0341045	-0.18782	0.250427	decrease
	indolin-2-one	Xenobiotics	Food Component/Plant	CG	-0.033917	-0.160349	0.213798	decrease
	carnosine	Amino Acid	Histidine Metabolism	OG	-0.0333612	0.0510864	-0.0681152	increase
	N-acetylglutamine	Amino Acid	Glutamate Metabolism	CG	-0.0331194	-0.112908	0.150544	decrease
	N-acetylglucosamine conjugate of C24H40O4 bile acid**	Partially Characterized Molecules	Partially Characterized Molecules	OG	-0.033006	0.266439	-0.355251	increase
	androsterone sulfate	Lipid	Androgenic Steroids	CG	-0.032969	-0.0927213	0.123628	decrease
	octadecanedioate (C18-DC)	Lipid	Fatty Acid, Dicarboxylate	CG	-0.0329419	-0.0573874	0.0765165	decrease
	5alpha-androstan-3alpha,17beta-diol monosulfate (2)	Lipid	Androgenic Steroids	OG	-0.0328493	0.384413	-0.51255	increase
	indole	Amino Acid	Tryptophan Metabolism	CG	-0.0327156	-0.0502612	0.0670149	decrease
	ergosterol	Lipid	Sterol	CG	-0.0326563	-0.257049	0.342733	decrease
	1-methyl-5-imidazolelactate	Amino Acid	Histidine Metabolism	CG	-0.0326114	-0.476596	0.635461	decrease
	glycosyl-N-palmitoyl-sphingosine (d18:1/16:0)	Lipid	Hexosylceramides (HCER)	CG	-0.0320491	-0.273711	0.364948	decrease
	7-ketodeoxycholate	Lipid	Secondary Bile Acid Metabolism	OG	-0.0319257	0.0914367	-0.121916	increase
	m-tyramine	Amino Acid	Tyrosine Metabolism	CG	-0.0316903	-0.228714	0.304951	decrease
	leucine	Amino Acid	Leucine, Isoleucine and Valine Metabolism	CG	-0.0312768	-0.102261	0.136347	decrease
	diacetylspermidine*	Amino Acid	Polyamine Metabolism	CG	-0.0312706	-0.190634	0.254179	decrease
	valylglutamine	Peptide	Dipeptide	OG	-0.0312391	0.353713	-0.471617	increase
	prolylalanine	Peptide	Dipeptide	OG	-0.031236	0.253394	-0.337859	increase
	cyclo(pro-sulfo-tyr)*	Peptide	Dipeptide	CG	-0.0310117	-0.17559	0.234119	decrease
	5alpha-pregnan-diol disulfate	Lipid	Progestin Steroids	OG	-0.030882	0.114141	-0.152188	increase
	2-isopropylmalate	Xenobiotics	Food Component/Plant	CG	-0.0307765	-0.231329	0.308439	decrease
	1,2,3-benzenetriol sulfate (2)	Xenobiotics	Chemical	CG	-0.0307318	-0.127231	0.169642	decrease
	isobutyrylglycine	Amino Acid	Leucine, Isoleucine and Valine Metabolism	CG	-0.0307298	-0.38819	0.517587	decrease
	isovalerate (i5:0)	Amino Acid	Leucine, Isoleucine and Valine Metabolism	CG	-0.030655	-0.371756	0.495675	decrease
	argininate*	Amino Acid	Urea cycle; Arginine and Proline Metabolism	CG	-0.0305622	-0.271875	0.3625	decrease
	glycolithocholate	Lipid	Secondary Bile Acid Metabolism	CG	-0.0304867	-0.171016	0.228022	decrease
	1,7-dimethylurate	Xenobiotics	Xanthine Metabolism	CG	-0.0302984	-0.0248182	0.0330909	decrease
	1-palmitoyl-2-linoleoyl-galactosylglycerol (16:0/18:2)*	Lipid	Galactosyl Glycerolipids	CG	-0.0302771	-0.3999	0.5332	decrease
	2-hydroxy-4-(methylthio)butanoic acid	Amino Acid	Methionine, Cysteine, SAM and Taurine Metabolism	CG	-0.0300013	-0.185535	0.24738	decrease
	dihomo-linoleoylcarnitine (C20:2)*	Lipid	Fatty Acid Metabolism (Acyl Carnitine, Polyunsaturated)	CG	-0.029794	-0.294128	0.392171	decrease
	cysteinylglycine	Amino Acid	Glutathione Metabolism	OG	-0.029171	0.146824	-0.195766	increase
	prolylproline	Peptide	Dipeptide	CG	-0.0291566	-0.00331115	0.00441487	decrease
	5-oxoproline	Amino Acid	Glutathione Metabolism	CG	-0.0290869	-0.120123	0.160165	decrease
	valerylglycine	Lipid	Fatty Acid Metabolism (Acyl Glycine)	CG	-0.0289298	-0.0431592	0.0575457	decrease
	7-methylurate	Xenobiotics	Xanthine Metabolism	CG	-0.0288333	-0.254289	0.339053	decrease
	allo-threonine	Amino Acid	Glycine, Serine and Threonine Metabolism	OG	-0.0287515	0.207829	-0.277105	increase
	glycocholenate sulfate*	Lipid	Secondary Bile Acid Metabolism	CG	-0.0286506	-0.15422	0.205627	decrease
	O-sulfo-tyrosine	Xenobiotics	Chemical	CG	-0.0286067	-0.0734376	0.0979168	decrease
	2-hydroxyadipate	Lipid	Fatty Acid, Dicarboxylate	OG	-0.0285088	0.226603	-0.302137	increase
	valerate (5:0)	Lipid	Short Chain Fatty Acid	CG	-0.0284814	-0.390786	0.521049	decrease
	p-hydroxybenzaldehyde	Xenobiotics	Benzoate Metabolism	OG	-0.0284091	0.134769	-0.179692	increase
	1-linoleoyl-2-linolenoyl-digalactosylglycerol (18:2/18:3)*	Lipid	Galactosyl Glycerolipids	OG	-0.0283969	0.205953	-0.274604	increase
	propionylglutamine	Amino Acid	Glutamate Metabolism	CG	-0.0283186	-0.079927	0.106569	decrease
	glycerophosphoglycerol	Lipid	Glycerolipid Metabolism	CG	-0.0282784	-0.173498	0.231331	decrease
	5alpha-pregnan-3beta,20alpha-diol monosulfate (1)	Lipid	Progestin Steroids	OG	-0.0281175	0.357179	-0.476239	increase
	lactosyl-N-stearoyl-sphingosine (d18:1/18:0)*	Lipid	Lactosylceramides (LCER)	CG	-0.0280861	-0.119449	0.159266	decrease
	catechol sulfate	Xenobiotics	Benzoate Metabolism	CG	-0.02799	-0.139426	0.185902	decrease
	N1-methyl-2-pyridone-5-carboxamide	Cofactors and Vitamins	Nicotinate and Nicotinamide Metabolism	CG	-0.0278322	-0.251041	0.334721	decrease
	gamma-glutamylphenylalanine	Peptide	Gamma-glutamyl Amino Acid	OG	-0.0276545	0.117558	-0.156743	increase
	N6,N6,N6-trimethyllysine	Amino Acid	Lysine Metabolism	OG	-0.0275236	0.062033	-0.0827106	increase
	5-aminovalerate	Amino Acid	Lysine Metabolism	CG	-0.0274645	-0.00255814	0.00341085	decrease
	(3'-5')-uridylylguanosine	Nucleotide	Dinucleotide	OG	-0.0274203	0.251997	-0.335996	increase
	N-acetyl-aspartyl-glutamate (NAAG)	Amino Acid	Glutamate Metabolism	OG	-0.027292	0.0814001	-0.108533	increase
	pyruvate	Carbohydrate	Glycolysis, Gluconeogenesis, and Pyruvate Metabolism	CG	-0.0271781	-0.16738	0.223173	decrease
	glycerate	Carbohydrate	Glycolysis, Gluconeogenesis, and Pyruvate Metabolism	CG	-0.0271564	-0.00070852	0.000944693	decrease
	N-acetyltaurine	Amino Acid	Methionine, Cysteine, SAM and Taurine Metabolism	CG	-0.0270646	-0.0376389	0.0501852	decrease
	branched chain 14:0 dicarboxylic acid**	Lipid	Fatty Acid, Dicarboxylate	CG	-0.0267865	-0.558544	0.744725	decrease
	palmitoyl dihydrosphingomyelin (d18:0/16:0)*	Lipid	Dihydrosphingomyelins	CG	-0.0264593	-0.148319	0.197758	decrease
	4-acetamidobutanoate	Amino Acid	Polyamine Metabolism	OG	-0.0263073	0.42801	-0.57068	increase
	palmitoylcarnitine (C16)	Lipid	Fatty Acid Metabolism (Acyl Carnitine, Long Chain Saturated)	OG	-0.0261072	0.0374713	-0.0499618	increase
	S-1-pyrroline-5-carboxylate	Amino Acid	Glutamate Metabolism	CG	-0.0260509	-0.31651	0.422013	decrease
	glycine	Amino Acid	Glycine, Serine and Threonine Metabolism	CG	-0.0258045	-0.207649	0.276865	decrease
	citraconate/glutaconate	Energy	TCA Cycle	CG	-0.0257107	-0.320927	0.427903	decrease
	1-oleoyl-GPC (18:1)	Lipid	Lysophospholipid	OG	-0.0257103	0.324567	-0.432756	increase
	alanyllysine	Peptide	Dipeptide	OG	-0.0256805	0.174001	-0.232002	increase
	pregnenediol disulfate (C21H34O8S2)*	Lipid	Pregnenolone Steroids	OG	-0.0254356	0.0219711	-0.0292948	increase
	glycoursodeoxycholate	Lipid	Secondary Bile Acid Metabolism	CG	-0.0253511	-0.114154	0.152205	decrease
	N-lactoyl phenylalanine	Amino Acid	Lactoyl Amino Acid	CG	-0.0251569	-0.148146	0.197528	decrease
	pregnenediol sulfate (C21H34O5S)*	Lipid	Pregnenolone Steroids	OG	-0.0250769	0.173357	-0.231142	increase
	3-methyladipate	Lipid	Fatty Acid, Dicarboxylate	OG	-0.0249114	0.279942	-0.373257	increase
	1-palmitoyl-2-linolenoyl-digalactosylglycerol (16:0/18:3)	Lipid	Galactosyl Glycerolipids	OG	-0.0249092	0.0105876	-0.0141168	increase
	tauroursodeoxycholate	Lipid	Secondary Bile Acid Metabolism	CG	-0.024484	-0.189482	0.252643	decrease
	eugenol sulfate	Xenobiotics	Food Component/Plant	CG	-0.0244128	-0.101185	0.134913	decrease
	ursodeoxycholate	Lipid	Secondary Bile Acid Metabolism	CG	-0.0242821	-0.0575012	0.0766683	decrease
	alpha-hydroxyisocaproate	Amino Acid	Leucine, Isoleucine and Valine Metabolism	CG	-0.0242671	-0.126199	0.168265	decrease
	4-ureidobutyrate	Nucleotide	Pyrimidine Metabolism, Uracil containing	OG	-0.0240847	0.0435009	-0.0580012	increase
	fucose	Carbohydrate	Aminosugar Metabolism	CG	-0.0240824	-0.321561	0.428748	decrease
	lysine	Amino Acid	Lysine Metabolism	CG	-0.0240368	-0.385487	0.513982	decrease
	phenylacetylaspartate	Peptide	Acetylated Peptides	CG	-0.0239564	-0.41605	0.554733	decrease
	erythrose	Xenobiotics	Food Component/Plant	OG	-0.0238595	0.167559	-0.223412	increase
	laurylcarnitine (C12)	Lipid	Fatty Acid Metabolism (Acyl Carnitine, Medium Chain)	CG	-0.0237544	-0.0243325	0.0324434	decrease
	2,3-dimethylsuccinate	Amino Acid	Leucine, Isoleucine and Valine Metabolism	CG	-0.0237071	-0.324389	0.432519	decrease
	dihydroferulic acid sulfate	Xenobiotics	Food Component/Plant	OG	-0.0236186	0.0107107	-0.014281	increase
	1-linoleoyl-GPC (18:2)	Lipid	Lysophospholipid	OG	-0.0234952	0.0247093	-0.0329457	increase
	biocytin	Cofactors and Vitamins	Biotin Metabolism	CG	-0.0234499	-0.283081	0.377441	decrease
	tryptophan	Amino Acid	Tryptophan Metabolism	OG	-0.023382	0.00392335	-0.00523113	increase
	pyroglutamylvaline	Peptide	Modified Peptides	OG	-0.0231253	0.0270587	-0.0360783	increase
	eicosanoylsphingosine (d20:1)*	Lipid	Sphingosines	OG	-0.0231107	0.137259	-0.183012	increase
	oleoylcarnitine (C18:1)	Lipid	Fatty Acid Metabolism (Acyl Carnitine, Monounsaturated)	OG	-0.022804	0.15786	-0.21048	increase
	methionine	Amino Acid	Methionine, Cysteine, SAM and Taurine Metabolism	CG	-0.0226867	-0.227212	0.30295	decrease
	5alpha-androstan-3beta,17beta-diol monosulfate (2)	Lipid	Androgenic Steroids	CG	-0.0225159	-0.0561956	0.0749275	decrease
	cholate	Lipid	Primary Bile Acid Metabolism	OG	-0.0222981	0.209044	-0.278726	increase
	gamma-CEHC sulfate	Cofactors and Vitamins	Tocopherol Metabolism	OG	-0.0222598	0.0961218	-0.128162	increase
	androstenediol (3beta,17beta) monosulfate (2)	Lipid	Androgenic Steroids	OG	-0.0222595	0.387899	-0.517198	increase
	2-piperidinone	Xenobiotics	Food Component/Plant	OG	-0.022204	0.117981	-0.157308	increase
	1-stearoyl-GPG (18:0)	Lipid	Lysophospholipid	OG	-0.0221442	0.170713	-0.227618	increase
	3-methylglutarate/2-methylglutarate	Lipid	Fatty Acid, Dicarboxylate	OG	-0.0220542	0.28385	-0.378466	increase
	N-pentadecanoyl-sphingosine (d18:1/15:0)*	Lipid	Ceramides	OG	-0.0219514	0.0293908	-0.0391878	increase
	4-hydroxyphenylacetate sulfate	Amino Acid	Tyrosine Metabolism	CG	-0.0218711	-0.154992	0.206656	decrease
	5alpha-androstan-3alpha,17beta-diol disulfate	Lipid	Androgenic Steroids	CG	-0.0215789	-0.0272019	0.0362691	decrease
	N-acetyl-3-methylhistidine*	Amino Acid	Histidine Metabolism	CG	-0.0215302	-0.356635	0.475513	decrease
	gamma-glutamylisoleucine*	Peptide	Gamma-glutamyl Amino Acid	OG	-0.0213955	0.138932	-0.185242	increase
	pyroglutamylalanine*	Peptide	Modified Peptides	OG	-0.0213564	0.00669938	-0.00893251	increase
	creatinine	Amino Acid	Creatine Metabolism	OG	-0.0213301	0.144229	-0.192305	increase
	1,3-dimethylurate	Xenobiotics	Xanthine Metabolism	CG	-0.0212081	-0.477728	0.636971	decrease
	gamma-glutamylhistidine	Peptide	Gamma-glutamyl Amino Acid	OG	-0.0210974	0.199741	-0.266321	increase
	3-methyl-2-oxobutyrate	Amino Acid	Leucine, Isoleucine and Valine Metabolism	CG	-0.0208559	-0.052978	0.0706373	decrease
	N-acetyl-1-methylhistidine*	Amino Acid	Histidine Metabolism	CG	-0.020755	-0.155715	0.20762	decrease
	valine	Amino Acid	Leucine, Isoleucine and Valine Metabolism	CG	-0.0205863	-0.0268561	0.0358081	decrease
	myristoylcarnitine (C14)	Lipid	Fatty Acid Metabolism (Acyl Carnitine, Long Chain Saturated)	CG	-0.0205165	-0.0222036	0.0296048	decrease
	deoxycholic acid glucuronide	Lipid	Secondary Bile Acid Metabolism	OG	-0.0204408	0.109624	-0.146166	increase
	taurocholenate sulfate*	Lipid	Secondary Bile Acid Metabolism	CG	-0.0203555	-0.144187	0.19225	decrease
	N-acetylmethionine	Amino Acid	Methionine, Cysteine, SAM and Taurine Metabolism	CG	-0.0203509	-0.192747	0.256995	decrease
	N-palmitoyl-heptadecasphingosine (d17:1/16:0)*	Lipid	Ceramides	CG	-0.0201589	-0.117213	0.156283	decrease
	gamma-glutamylcitrulline*	Peptide	Gamma-glutamyl Amino Acid	CG	-0.0200976	-0.0593873	0.0791831	decrease
	bilirubin degradation product, C16H18N2O5 (2)**	Partially Characterized Molecules	Partially Characterized Molecules	CG	-0.019995	-0.0919159	0.122555	decrease
	N-palmitoyl-sphingosine (d18:1/16:0)	Lipid	Ceramides	CG	-0.0198583	-0.0525371	0.0700495	decrease
	pipecolate	Amino Acid	Lysine Metabolism	CG	-0.0197917	-0.142374	0.189833	decrease
	palmitoyl sphingomyelin (d18:1/16:0)	Lipid	Sphingomyelins	CG	-0.0197113	-0.325141	0.433521	decrease
	N6-carboxymethyllysine	Carbohydrate	Advanced Glycation End-product	CG	-0.0196688	-0.0167573	0.022343	decrease
	coprostanol	Lipid	Sterol	CG	-0.0196177	-0.127187	0.169583	decrease
	dexpanthenol	Xenobiotics	Chemical	CG	-0.0195235	-0.0344848	0.0459797	decrease
	N-acetylpyrraline	Xenobiotics	Food Component/Plant	CG	-0.019355	-0.412377	0.549836	decrease
	phenylalanylglycine	Peptide	Dipeptide	OG	-0.019338	0.188707	-0.25161	increase
	alanine	Amino Acid	Alanine and Aspartate Metabolism	CG	-0.0191332	-0.0579786	0.0773048	decrease
	adenosine 5'-monophosphate (AMP)	Nucleotide	Purine Metabolism, Adenine containing	OG	-0.0189575	0.47385	-0.6318	increase
	piperine	Xenobiotics	Food Component/Plant	CG	-0.0187848	-0.056761	0.0756813	decrease
	adenosine-2',3'-cyclic monophosphate	Nucleotide	Purine Metabolism, Adenine containing	CG	-0.0187025	-0.0906407	0.120854	decrease
	taurodeoxycholic acid 3-sulfate	Lipid	Secondary Bile Acid Metabolism	CG	-0.0185871	-0.141737	0.188982	decrease
	7-ketolithocholate	Lipid	Secondary Bile Acid Metabolism	OG	-0.0185435	0.00942324	-0.0125643	increase
	5-dodecenoate (12:1n7)	Lipid	Medium Chain Fatty Acid	CG	-0.018485	-0.301836	0.402448	decrease
	quinolinate	Cofactors and Vitamins	Nicotinate and Nicotinamide Metabolism	OG	-0.0181653	0.207656	-0.276875	increase
	2-hydroxysebacate	Lipid	Fatty Acid, Dicarboxylate	OG	-0.0181257	0.253495	-0.337993	increase
	prolylglycine	Peptide	Dipeptide	OG	-0.0181189	0.0888128	-0.118417	increase
	myristoyl dihydrosphingomyelin (d18:0/14:0)*	Lipid	Dihydrosphingomyelins	CG	-0.0180745	-0.265035	0.353381	decrease
	pentadecanoate (15:0)	Lipid	Long Chain Saturated Fatty Acid	OG	-0.0180369	0.199237	-0.265649	increase
	cyclo(his-pro)	Peptide	Dipeptide	OG	-0.0180091	0.0118249	-0.0157665	increase
	1-palmitoyl-2-linoleoyl-digalactosylglycerol (16:0/18:2)*	Lipid	Galactosyl Glycerolipids	OG	-0.0179874	0.171354	-0.228472	increase
	myristoleate (14:1n5)	Lipid	Long Chain Monounsaturated Fatty Acid	CG	-0.0179874	-0.376998	0.502664	decrease
	1-stearoyl-2-linoleoyl-GPC (18:0/18:2)*	Lipid	Phosphatidylcholine (PC)	OG	-0.0177282	0.441576	-0.588768	increase
	N-methylproline	Amino Acid	Urea cycle; Arginine and Proline Metabolism	CG	-0.017625	-0.0968195	0.129093	decrease
	pregnenolone sulfate	Lipid	Pregnenolone Steroids	CG	-0.0175778	-0.147146	0.196195	decrease
	gamma-glutamylglutamine	Peptide	Gamma-glutamyl Amino Acid	OG	-0.017567	0.0404079	-0.0538772	increase
	L-urobilin	Cofactors and Vitamins	Hemoglobin and Porphyrin Metabolism	CG	-0.0174256	-0.278065	0.370753	decrease
	N,N,N-trimethyl-5-aminovalerate	Amino Acid	Lysine Metabolism	CG	-0.0173805	-0.389417	0.519223	decrease
	3-hydroxyphenylacetate sulfate	Amino Acid	Tyrosine Metabolism	CG	-0.0173737	-0.434164	0.578886	decrease
	sulfate of piperine metabolite C18H21NO3 (3)*	Xenobiotics	Food Component/Plant	OG	-0.0173049	0.0812498	-0.108333	increase
	N-methyl-GABA	Amino Acid	Glutamate Metabolism	CG	-0.0172261	-0.343871	0.458495	decrease
	betaine	Amino Acid	Glycine, Serine and Threonine Metabolism	OG	-0.0172207	0.217778	-0.290371	increase
	N-acetyltyrosine	Amino Acid	Tyrosine Metabolism	CG	-0.0171142	-0.50105	0.668067	decrease
	3-(4-hydroxyphenyl)propionate	Xenobiotics	Benzoate Metabolism	CG	-0.0170417	-0.0171854	0.0229138	decrease
	2-hydroxymyristate	Lipid	Fatty Acid, Monohydroxy	OG	-0.0169663	0.0132956	-0.0177275	increase
	dihydrocaffeate sulfate (2)	Xenobiotics	Food Component/Plant	CG	-0.0169517	-0.122033	0.16271	decrease
	solanidine	Xenobiotics	Food Component/Plant	CG	-0.0168364	-0.256476	0.341969	decrease
	thiamin (vitamin B1)	Cofactors and Vitamins	Thiamine Metabolism	CG	-0.0167933	-0.140993	0.18799	decrease
	cyclo(his-pro) (D,L)*	Peptide	Dipeptide	OG	-0.0166605	0.00636211	-0.00848281	increase
	ceramide (d18:1/20:0, d16:1/22:0, d20:1/18:0)*	Lipid	Ceramides	CG	-0.0165647	-0.0931226	0.124163	decrease
	(R)-salsolinol	Amino Acid	Tyrosine Metabolism	CG	-0.0163878	-0.294479	0.392639	decrease
	p-cresol	Xenobiotics	Benzoate Metabolism	CG	-0.016295	-0.0780061	0.104008	decrease
	N6-methyladenosine	Nucleotide	Purine Metabolism, Adenine containing	OG	-0.0162718	0.0773813	-0.103175	increase
	glycosyl-N-nervonoyl-sphingosine (d18:1/24:1)*	Lipid	Hexosylceramides (HCER)	CG	-0.0161239	-0.143225	0.190966	decrease
	gamma-glutamyl-2-aminobutyrate	Peptide	Gamma-glutamyl Amino Acid	OG	-0.0160409	0.118994	-0.158659	increase
	hydantoin-5-propionate	Amino Acid	Histidine Metabolism	OG	-0.0159541	0.256065	-0.341419	increase
	stearoylcarnitine (C18)	Lipid	Fatty Acid Metabolism (Acyl Carnitine, Long Chain Saturated)	CG	-0.0159043	-0.0863729	0.115164	decrease
	steviol	Xenobiotics	Food Component/Plant	OG	-0.0158645	0.118974	-0.158632	increase
	tetrahydrocortisol sulfate (1)	Lipid	Corticosteroids	CG	-0.0158549	-0.0464964	0.0619952	decrease
	pantothenate	Cofactors and Vitamins	Pantothenate and CoA Metabolism	CG	-0.0157542	-0.247461	0.329949	decrease
	I-urobilinogen	Cofactors and Vitamins	Hemoglobin and Porphyrin Metabolism	CG	-0.0157468	-0.00761996	0.0101599	decrease
	sulfate of piperine metabolite C16H19NO3 (1)*	Xenobiotics	Food Component/Plant	CG	-0.0156238	-0.0673635	0.089818	decrease
	2,4-dihydroxyhydrocinnamate	Xenobiotics	Benzoate Metabolism	OG	-0.0154963	0.0759883	-0.101318	increase
	heme	Cofactors and Vitamins	Hemoglobin and Porphyrin Metabolism	OG	-0.0154665	0.0380119	-0.0506826	increase
	N-acetylmuramate	Carbohydrate	Aminosugar Metabolism	CG	-0.0154471	-0.0629261	0.0839014	decrease
	glycodeoxycholate	Lipid	Secondary Bile Acid Metabolism	CG	-0.0149033	-0.342287	0.456382	decrease
	bilirubin degradation product, C17H18N2O4 (1)**	Partially Characterized Molecules	Partially Characterized Molecules	CG	-0.014842	-0.233417	0.311222	decrease
	epiandrosterone sulfate	Lipid	Androgenic Steroids	CG	-0.0148391	-0.0637299	0.0849733	decrease
	glycochenodeoxycholate	Lipid	Primary Bile Acid Metabolism	CG	-0.0147671	-0.387961	0.517281	decrease
	3-dehydrocholate	Lipid	Secondary Bile Acid Metabolism	CG	-0.0146694	-0.151784	0.202378	decrease
	glycerophosphorylcholine (GPC)	Lipid	Phospholipid Metabolism	OG	-0.0143252	0.233724	-0.311632	increase
	2R,3R-dihydroxybutyrate	Lipid	Fatty Acid, Dihydroxy	CG	-0.0142396	-0.109315	0.145753	decrease
	enterodiol	Xenobiotics	Food Component/Plant	OG	-0.0141701	0.162055	-0.216073	increase
	5alpha-androstan-3alpha,17alpha-diol disulfate	Lipid	Androgenic Steroids	CG	-0.014159	-0.233233	0.310978	decrease
	gamma-CEHC	Cofactors and Vitamins	Tocopherol Metabolism	CG	-0.014012	-0.12986	0.173147	decrease
	1-methyl-5-imidazoleacetate	Amino Acid	Histidine Metabolism	CG	-0.0140046	-0.43943	0.585907	decrease
	alpha-hydroxyisovalerate	Amino Acid	Leucine, Isoleucine and Valine Metabolism	CG	-0.0139802	-0.193685	0.258247	decrease
	glycylproline	Peptide	Dipeptide	CG	-0.0139716	-0.0574472	0.0765962	decrease
	ectoine	Xenobiotics	Chemical	CG	-0.0138663	-0.114189	0.152252	decrease
	mevalonate	Lipid	Mevalonate Metabolism	CG	-0.0138192	-0.152659	0.203546	decrease
	palmitoylcholine	Lipid	Fatty Acid Metabolism (Acyl Choline)	CG	-0.0137799	-0.050195	0.0669267	decrease
	diacetylchitobiose	Carbohydrate	Aminosugar Metabolism	OG	-0.0136285	0.162833	-0.21711	increase
	citrulline	Amino Acid	Urea cycle; Arginine and Proline Metabolism	OG	-0.0135855	0.0359208	-0.0478944	increase
	histidylalanine	Peptide	Dipeptide	OG	-0.013549	0.164712	-0.219616	increase
	5alpha-androstan-3beta,17alpha-diol disulfate	Lipid	Androgenic Steroids	CG	-0.0134464	-0.0526813	0.0702418	decrease
	spermidine	Amino Acid	Polyamine Metabolism	CG	-0.0134464	-0.49915	0.665533	decrease
	3,4-dihydroxybutyrate	Lipid	Fatty Acid, Dihydroxy	OG	-0.0133515	0.149717	-0.199622	increase
	pyrraline	Xenobiotics	Food Component/Plant	CG	-0.013285	-0.43665	0.582201	decrease
	N-acetylisoleucine	Amino Acid	Leucine, Isoleucine and Valine Metabolism	CG	-0.0132215	-0.211544	0.282058	decrease
	N-acetylvaline	Amino Acid	Leucine, Isoleucine and Valine Metabolism	OG	-0.013208	0.0163413	-0.0217883	increase
	epicatechin	Xenobiotics	Food Component/Plant	OG	-0.0131848	0.141737	-0.188982	increase
	pristanate	Lipid	Fatty Acid, Branched	CG	-0.0130953	-0.094053	0.125404	decrease
	naringenin	Xenobiotics	Food Component/Plant	CG	-0.0129975	-0.0698604	0.0931472	decrease
	tauroursodeoxycholic acid sulfate (2)	Lipid	Secondary Bile Acid Metabolism	CG	-0.012991	-0.222242	0.296323	decrease
	N-formylphenylalanine	Amino Acid	Tyrosine Metabolism	OG	-0.0126585	0.136518	-0.182024	increase
	N-methylphenylalanine	Amino Acid	Phenylalanine Metabolism	OG	-0.0124895	0.319562	-0.426082	increase
	diglycerol	Xenobiotics	Chemical	CG	-0.012486	-0.217959	0.290612	decrease
	butyrate/isobutyrate (4:0)	Lipid	Short Chain Fatty Acid	CG	-0.0123143	-0.391671	0.522228	decrease
	5alpha-androstan-3beta,17alpha-diol monosulfate (1)	Lipid	Androgenic Steroids	OG	-0.0121735	0.0532622	-0.0710163	increase
	paraxanthine	Xenobiotics	Xanthine Metabolism	OG	-0.0121346	0.038242	-0.0509893	increase
	carotene diol (3)	Cofactors and Vitamins	Vitamin A Metabolism	OG	-0.0121083	0.152221	-0.202962	increase
	3-indoxyl sulfate	Amino Acid	Tryptophan Metabolism	OG	-0.0121007	0.00500505	-0.0066734	increase
	beta-hydroxyisovalerate	Amino Acid	Leucine, Isoleucine and Valine Metabolism	CG	-0.0119158	-0.398914	0.531886	decrease
	phenylalanine	Amino Acid	Phenylalanine Metabolism	CG	-0.0117955	-0.130766	0.174354	decrease
	3-formylindole	Xenobiotics	Food Component/Plant	CG	-0.0117588	-0.278237	0.370983	decrease
	guanidinoacetate	Amino Acid	Creatine Metabolism	OG	-0.0117051	0.0600272	-0.0800362	increase
	1-margaroyl-GPE (17:0)*	Lipid	Lysophospholipid	CG	-0.0116181	-0.525368	0.700491	decrease
	tartarate	Xenobiotics	Food Component/Plant	CG	-0.0115643	-0.152574	0.203432	decrease
	3-(4-hydroxyphenyl)lactate	Amino Acid	Tyrosine Metabolism	OG	-0.0114634	0.142979	-0.190639	increase
	dimethylarginine (SDMA + ADMA)	Amino Acid	Urea cycle; Arginine and Proline Metabolism	OG	-0.011387	0.187322	-0.249763	increase
	3-methyl-2-oxovalerate	Amino Acid	Leucine, Isoleucine and Valine Metabolism	CG	-0.0113722	-0.323334	0.431112	decrease
	N-stearoyl-sphinganine (d18:0/18:0)*	Lipid	Dihydroceramides	OG	-0.0111912	0.224452	-0.299269	increase
	acesulfame	Xenobiotics	Food Component/Plant	CG	-0.0111874	-0.0306082	0.0408109	decrease
	cyclo(gly-pro)	Peptide	Dipeptide	CG	-0.0110271	-0.175287	0.233716	decrease
	tyrosine	Amino Acid	Tyrosine Metabolism	CG	-0.0109135	-0.21942	0.29256	decrease
	vanillate	Xenobiotics	Food Component/Plant	CG	-0.0109113	-0.0702217	0.0936289	decrease
	N-acetyl-isoputreanine	Amino Acid	Polyamine Metabolism	OG	-0.0108648	0.0430755	-0.057434	increase
	homoserine	Amino Acid	Glycine, Serine and Threonine Metabolism	CG	-0.0106483	-0.108884	0.145179	decrease
	butyrylglycine	Lipid	Fatty Acid Metabolism (also BCAA Metabolism)	CG	-0.0104448	-0.0247744	0.0330325	decrease
	gamma-glutamylleucine	Peptide	Gamma-glutamyl Amino Acid	CG	-0.0101957	-0.108404	0.144539	decrease
	trans-urocanate	Amino Acid	Histidine Metabolism	OG	-0.0101877	0.029678	-0.0395707	increase
	2-keto-3-deoxy-gluconate	Xenobiotics	Food Component/Plant	CG	-0.0101508	-0.313957	0.418609	decrease
	1-linoleoyl-GPE (18:2)*	Lipid	Lysophospholipid	OG	-0.0100732	0.117806	-0.157074	increase
	N2-acetyllysine	Amino Acid	Lysine Metabolism	CG	-0.0100725	-0.252965	0.337286	decrease
	imidazole lactate	Amino Acid	Histidine Metabolism	CG	-0.0100404	-0.195577	0.26077	decrease
	stearoyl ethanolamide	Lipid	Endocannabinoid	OG	-0.0100333	0.0787202	-0.10496	increase
	stachydrine	Xenobiotics	Food Component/Plant	CG	-0.00996737	-0.386224	0.514965	decrease
	glucose	Carbohydrate	Glycolysis, Gluconeogenesis, and Pyruvate Metabolism	CG	-0.00995364	-0.321703	0.428938	decrease
	methylurea	Amino Acid	Urea cycle; Arginine and Proline Metabolism	CG	-0.00989699	-0.270201	0.360268	decrease
	3-hydroxysebacate	Lipid	Fatty Acid, Monohydroxy	OG	-0.00979585	0.0580402	-0.0773869	increase
	1-margaroylglycerol (17:0)	Lipid	Monoacylglycerol	CG	-0.00972574	-0.18935	0.252467	decrease
	7-ketocholesterol	Lipid	Sterol	CG	-0.00962586	-0.239212	0.31895	decrease
	3-hydroxyadipate	Lipid	Fatty Acid, Dicarboxylate	OG	-0.00962543	0.103319	-0.137758	increase
	3-indoleglyoxylic acid	Xenobiotics	Food Component/Plant	CG	-0.00957244	-0.415612	0.554149	decrease
	pantetheine	Cofactors and Vitamins	Pantothenate and CoA Metabolism	CG	-0.00940325	-0.087279	0.116372	decrease
	alpha-ketoglutarate	Energy	TCA Cycle	CG	-0.00929887	-0.227674	0.303566	decrease
	2,8-quinolinediol sulfate	Xenobiotics	Food Component/Plant	CG	-0.00912739	-0.278981	0.371975	decrease
	2'-deoxyuridine	Nucleotide	Pyrimidine Metabolism, Uracil containing	CG	-0.00906202	-0.452594	0.603458	decrease
	malonate	Lipid	Fatty Acid Synthesis	CG	-0.00900852	-0.183832	0.24511	decrease
	N1,N12-diacetylspermine	Amino Acid	Polyamine Metabolism	OG	-0.0089816	0.0819135	-0.109218	increase
	12-dehydrocholate	Lipid	Secondary Bile Acid Metabolism	OG	-0.00897348	0.0884822	-0.117976	increase
	3-(3-hydroxyphenyl)propionate sulfate	Xenobiotics	Benzoate Metabolism	CG	-0.00894005	-0.290751	0.387667	decrease
	(3'-5')-uridylyluridine	Nucleotide	Dinucleotide	OG	-0.00886343	0.115066	-0.153421	increase
	N-acetylglycine	Amino Acid	Glycine, Serine and Threonine Metabolism	CG	-0.00873867	-0.0485673	0.0647564	decrease
	glutamine	Amino Acid	Glutamate Metabolism	OG	-0.00870888	0.0195456	-0.0260608	increase
	azelate (C9-DC)	Lipid	Fatty Acid, Dicarboxylate	OG	-0.00868656	0.121439	-0.161918	increase
	docosahexaenoylcarnitine (C22:6)*	Lipid	Fatty Acid Metabolism (Acyl Carnitine, Polyunsaturated)	CG	-0.0086235	-0.190799	0.254398	decrease
	galactosylglycerol	Lipid	Galactosyl Glycerolipids	OG	-0.00861082	0.0256757	-0.0342343	increase
	cystine	Amino Acid	Methionine, Cysteine, SAM and Taurine Metabolism	OG	-0.00860925	0.0640298	-0.0853731	increase
	3-methylxanthine	Xenobiotics	Xanthine Metabolism	CG	-0.00851272	-0.224142	0.298856	decrease
	dimethylmalonic acid	Lipid	Fatty Acid, Dicarboxylate	OG	-0.00849878	0.0652574	-0.0870098	increase
	phenylalanylalanine	Peptide	Dipeptide	CG	-0.00845867	-0.0444692	0.0592922	decrease
	eriodictyol	Xenobiotics	Food Component/Plant	CG	-0.00838494	-0.272017	0.362689	decrease
	N-acetyl-beta-glucosaminylamine	Carbohydrate	Aminosugar Metabolism	OG	-0.00822395	0.343128	-0.457504	increase
	3-hydroxyoctanoate	Lipid	Fatty Acid, Monohydroxy	CG	-0.00820438	-0.143473	0.191298	decrease
	ursolic acid	Xenobiotics	Food Component/Plant	CG	-0.00815411	-0.345074	0.460099	decrease
	homocitrulline	Amino Acid	Urea cycle; Arginine and Proline Metabolism	OG	-0.00812175	0.0127746	-0.0170328	increase
	homostachydrine*	Xenobiotics	Food Component/Plant	CG	-0.00790865	-0.559636	0.746181	decrease
	glucuronate	Carbohydrate	Aminosugar Metabolism	OG	-0.00783347	0.0426593	-0.0568791	increase
	2'-deoxyguanosine	Nucleotide	Purine Metabolism, Guanine containing	CG	-0.00780168	-0.376351	0.501801	decrease
	dehydrophytosphingosine*	Lipid	Sphingolipid Synthesis	OG	-0.00767137	0.0923087	-0.123078	increase
	phytanate	Xenobiotics	Food Component/Plant	CG	-0.00762888	-0.313929	0.418572	decrease
	serine	Amino Acid	Glycine, Serine and Threonine Metabolism	CG	-0.00759069	-0.214432	0.28591	decrease
	pinoresinol	Xenobiotics	Food Component/Plant	OG	-0.00756704	0.302403	-0.403203	increase
	1-methylhistamine	Amino Acid	Histidine Metabolism	OG	-0.0074498	0.0271391	-0.0361855	increase
	N-acetyl-2-aminoadipate	Amino Acid	Lysine Metabolism	CG	-0.00740244	-0.0582572	0.0776763	decrease
	2-aminoadipate	Amino Acid	Lysine Metabolism	OG	-0.00739985	0.15316	-0.204214	increase
	7-methylxanthine	Xenobiotics	Xanthine Metabolism	OG	-0.0073791	0.0832959	-0.111061	increase
	undecanoate (11:0)	Lipid	Medium Chain Fatty Acid	CG	-0.00734396	-0.384622	0.512829	decrease
	1-methylnicotinamide	Cofactors and Vitamins	Nicotinate and Nicotinamide Metabolism	CG	-0.00730462	-0.096031	0.128041	decrease
	dihydroorotate	Nucleotide	Pyrimidine Metabolism, Orotate containing	OG	-0.00725062	0.00428676	-0.00571568	increase
	phenol sulfate	Amino Acid	Tyrosine Metabolism	CG	-0.00724497	-0.0485252	0.0647002	decrease
	phenylacetyltaurine	Peptide	Acetylated Peptides	OG	-0.00704943	0.43822	-0.584294	increase
	theanine	Xenobiotics	Food Component/Plant	CG	-0.00697333	-0.259457	0.345943	decrease
	3-hydroxyhippurate	Xenobiotics	Benzoate Metabolism	OG	-0.00690002	0.0941968	-0.125596	increase
	uridine	Nucleotide	Pyrimidine Metabolism, Uracil containing	CG	-0.00678263	-0.350709	0.467612	decrease
	trimethylamine N-oxide	Lipid	Phospholipid Metabolism	CG	-0.00661572	-0.206137	0.27485	decrease
	N-methylpipecolate	Xenobiotics	Bacterial/Fungal	CG	-0.00661306	-0.272252	0.363002	decrease
	4-hydroxybenzoate	Xenobiotics	Benzoate Metabolism	OG	-0.00637171	0.0203486	-0.0271314	increase
	1,2-dilinoleoyl-digalactosylglycerol (18:2/18:2)*	Lipid	Galactosyl Glycerolipids	CG	-0.00632758	-0.0520145	0.0693526	decrease
	3-hydroxyvalerate	Lipid	Fatty Acid, Monohydroxy	OG	-0.00625358	0.118322	-0.157763	increase
	N-methylhydroxyproline**	Amino Acid	Urea cycle; Arginine and Proline Metabolism	CG	-0.00611085	-0.056817	0.0757561	decrease
	gamma-glutamyl-epsilon-lysine	Peptide	Gamma-glutamyl Amino Acid	CG	-0.00592323	-0.0224766	0.0299688	decrease
	leucylglutamine*	Peptide	Dipeptide	OG	-0.00582405	0.238968	-0.318624	increase
	(3'-5')-guanylylcytidine	Nucleotide	Dinucleotide	OG	-0.005683	0.128068	-0.170758	increase
	glycolithocholate sulfate*	Lipid	Secondary Bile Acid Metabolism	CG	-0.00558764	-0.31279	0.417053	decrease
	valylglycine	Peptide	Dipeptide	OG	-0.00557663	0.1216	-0.162133	increase
	palmitoyl-oleoyl-glycerol (16:0/18:1) [2]*	Lipid	Diacylglycerol	OG	-0.00553766	0.40079	-0.534386	increase
	N-acetylleucine	Amino Acid	Leucine, Isoleucine and Valine Metabolism	CG	-0.00540156	-0.0820513	0.109402	decrease
	taurocholate	Lipid	Primary Bile Acid Metabolism	CG	-0.00516449	-0.0632347	0.084313	decrease
	bilirubin degradation product, C17H20N2O5 (1)**	Partially Characterized Molecules	Partially Characterized Molecules	OG	-0.00511165	0.110291	-0.147055	increase
	histidine	Amino Acid	Histidine Metabolism	CG	-0.00507586	-0.0490138	0.0653518	decrease
	tryptamine	Amino Acid	Tryptophan Metabolism	CG	-0.00505311	-0.218645	0.291527	decrease
	3-sulfo-alanine	Amino Acid	Methionine, Cysteine, SAM and Taurine Metabolism	CG	-0.00492378	-0.177774	0.237033	decrease
	taurohyodeoxycholic acid	Lipid	Secondary Bile Acid Metabolism	CG	-0.0048982	-0.208358	0.277811	decrease
	citrate	Energy	TCA Cycle	OG	-0.00487896	0.00533763	-0.00711683	increase
	indolelactate	Amino Acid	Tryptophan Metabolism	CG	-0.00487733	-0.200024	0.266699	decrease
	oleoyl-oleoyl-glycerol (18:1/18:1) [1]*	Lipid	Diacylglycerol	OG	-0.00482156	0.311462	-0.415282	increase
	nicotinamide riboside	Cofactors and Vitamins	Nicotinate and Nicotinamide Metabolism	CG	-0.00481505	-0.0783695	0.104493	decrease
	3-methylglutaconate	Amino Acid	Leucine, Isoleucine and Valine Metabolism	OG	-0.00474685	0.124841	-0.166454	increase
	5alpha-androstan-3beta,17alpha-diol monosulfate (2)	Lipid	Androgenic Steroids	OG	-0.00473036	0.293518	-0.391357	increase
	N-acetyl-beta-alanine	Nucleotide	Pyrimidine Metabolism, Uracil containing	OG	-0.00466549	0.309953	-0.413271	increase
	carboxysuccinate	Energy	TCA Cycle	OG	-0.00463232	0.477024	-0.636032	increase
	(3'-5')-cytidylylguanosine	Nucleotide	Dinucleotide	CG	-0.00449947	-0.00678488	0.0090465	decrease
	N-acetyltryptophan	Amino Acid	Tryptophan Metabolism	CG	-0.00442248	-0.577827	0.770436	decrease
	N-acetylphenylalanine	Amino Acid	Phenylalanine Metabolism	CG	-0.00441914	-0.138691	0.184921	decrease
	9,10-DiHOME	Lipid	Fatty Acid, Dihydroxy	OG	-0.00405243	0.536976	-0.715968	increase
	putrescine	Amino Acid	Polyamine Metabolism	OG	-0.00399197	0.0950978	-0.126797	increase
	curcumin	Xenobiotics	Food Component/Plant	OG	-0.00397401	0.383443	-0.511258	increase
	N-acetylglucosamine/N-acetylgalactosamine	Carbohydrate	Aminosugar Metabolism	CG	-0.0039269	-0.112993	0.150657	decrease
	2,3-dihydroxy-5-methylthio-4-pentenoate (DMTPA)*	Amino Acid	Methionine, Cysteine, SAM and Taurine Metabolism	OG	-0.0039135	0.139896	-0.186529	increase
	N-palmitoylglycine	Lipid	Fatty Acid Metabolism (Acyl Glycine)	OG	-0.00387695	0.523971	-0.698628	increase
	glycocholate	Lipid	Primary Bile Acid Metabolism	CG	-0.00370802	-0.243458	0.32461	decrease
	threonine	Amino Acid	Glycine, Serine and Threonine Metabolism	CG	-0.00370063	-0.241202	0.321602	decrease
	cerotoylcarnitine (C26)*	Lipid	Fatty Acid Metabolism (Acyl Carnitine, Long Chain Saturated)	OG	-0.00348168	0.0247064	-0.0329419	increase
	1-linoleoyl-2-linolenoyl-galactosylglycerol (18:2/18:3)*	Lipid	Galactosyl Glycerolipids	OG	-0.00346335	0.0541262	-0.0721683	increase
	4-acetamidobenzoate	Xenobiotics	Chemical	OG	-0.00334357	0.0559536	-0.0746048	increase
	3-aminoisobutyrate	Nucleotide	Pyrimidine Metabolism, Thymine containing	CG	-0.00333993	-0.0907016	0.120936	decrease
	2-hydroxyhippurate (salicylurate)	Xenobiotics	Benzoate Metabolism	OG	-0.0033282	0.259742	-0.346323	increase
	secoisolariciresinol diglucoside	Xenobiotics	Food Component/Plant	OG	-0.00327682	0.0522599	-0.0696799	increase
	3-ureidoisobutyrate	Nucleotide	Pyrimidine Metabolism, Uracil containing	OG	-0.00326713	0.360219	-0.480292	increase
	8-hydroxyguanine	Nucleotide	Purine Metabolism, Guanine containing	CG	-0.00324881	-0.0951871	0.126916	decrease
	ribose	Carbohydrate	Pentose Metabolism	OG	-0.00317235	0.0049634	-0.00661787	increase
	narirutin (naringenin 7-O-rutinoside)	Xenobiotics	Food Component/Plant	CG	-0.00289233	-0.161561	0.215415	decrease
	4-methyl-2-oxopentanoate	Amino Acid	Leucine, Isoleucine and Valine Metabolism	CG	-0.00270106	-0.401668	0.535558	decrease
	2-hydroxyglutarate	Lipid	Fatty Acid, Dicarboxylate	CG	-0.00267808	-0.146936	0.195915	decrease
	lyxonate	Carbohydrate	Pentose Metabolism	CG	-0.00255093	-0.0235975	0.0314633	decrease
	oleoyl ethanolamide	Lipid	Endocannabinoid	OG	-0.0024817	0.505285	-0.673713	increase
	glycerophosphoethanolamine	Lipid	Phospholipid Metabolism	CG	-0.00206177	-0.452376	0.603168	decrease
	1-(1-enyl-palmitoyl)-GPE (P-16:0)*	Lipid	Lysoplasmalogen	CG	-0.00198448	-0.513426	0.684568	decrease
	3-hydroxyarachidate*	Lipid	Fatty Acid, Monohydroxy	OG	-0.00195893	0.0890509	-0.118735	increase
	ursodeoxycholate sulfate (1)	Lipid	Secondary Bile Acid Metabolism	OG	-0.00186079	0.149701	-0.199601	increase
	carboxymethylproline	Amino Acid	Urea cycle; Arginine and Proline Metabolism	CG	-0.00159638	-0.280654	0.374205	decrease
	8-methoxykynurenate	Amino Acid	Tryptophan Metabolism	OG	-0.00135978	0.681344	-0.908458	increase
	N6,N6-dimethyllysine	Amino Acid	Lysine Metabolism	OG	-0.00133179	0.272063	-0.362751	increase
	(3'-5')-adenylylguanosine*	Nucleotide	Dinucleotide	CG	-0.00125959	-0.0138728	0.0184971	decrease
	1-palmitoyl-2-linoleoyl-GPC (16:0/18:2)	Lipid	Phosphatidylcholine (PC)	OG	-0.00109775	0.114475	-0.152633	increase
	hesperidin (hesperetin 7-rutinoside)	Xenobiotics	Food Component/Plant	CG	-0.0010973	-0.21409	0.285454	decrease
	glutamate	Amino Acid	Glutamate Metabolism	CG	-0.00108908	-0.0261079	0.0348105	decrease
	1,2-dilinolenoyl-digalactosylglycerol (18:3/18:3)	Lipid	Galactosyl Glycerolipids	OG	-0.000987749	0.0204302	-0.0272403	increase
	1-palmitoyl-2-linoleoyl-GPI (16:0/18:2)	Lipid	Phosphatidylinositol (PI)	OG	-0.000953777	0.425327	-0.567103	increase
	5-(2-hydroxyethyl)-4-methylthiazole	Cofactors and Vitamins	Thiamine Metabolism	CG	-0.000932851	-0.364271	0.485694	decrease
	1-stearoyl-GPE (18:0)	Lipid	Lysophospholipid	CG	-0.00091953	-0.410481	0.547308	decrease
	gamma-glutamylglutamate	Peptide	Gamma-glutamyl Amino Acid	OG	-0.000823791	0.125247	-0.166995	increase
	7,12-diketolithocholate	Lipid	Secondary Bile Acid Metabolism	CG	-0.000736945	-0.0908945	0.121193	decrease
	proline	Amino Acid	Urea cycle; Arginine and Proline Metabolism	CG	-0.000700216	-0.242456	0.323275	decrease
	3-hydroxyoleoylcarnitine	Lipid	Fatty Acid Metabolism (Acyl Carnitine, Hydroxy)	CG	-0.000522569	-0.0355139	0.0473519	decrease
	3-hydroxypalmitate	Lipid	Fatty Acid, Monohydroxy	OG	-0.000375876	0.468141	-0.624187	increase
	N-acetylhistamine	Amino Acid	Histidine Metabolism	OG	-0.000306298	0.146828	-0.195771	increase
	S-allylcysteine	Xenobiotics	Food Component/Plant	OG	-0.000289967	0.21012	-0.28016	increase
	2-hydroxybutyrate/2-hydroxyisobutyrate	Amino Acid	Glutathione Metabolism	CG	-3.9638e-06	-0.409771	0.546362	decrease
	10-undecenoate (11:1n1)	Lipid	Medium Chain Fatty Acid	CG	0.000152743	-0.394701	0.526268	decrease
	3-hydroxymargarate	Lipid	Fatty Acid, Monohydroxy	OG	0.000192574	0.161906	-0.215875	increase
	1-linolenoyl-galactosylglycerol (18:3)*	Lipid	Galactosyl Glycerolipids	CG	0.000306088	-0.0665628	0.0887505	decrease
	tryptophylglycine	Peptide	Dipeptide	OG	0.000471974	0.181576	-0.242101	increase
	taurodeoxycholate	Lipid	Secondary Bile Acid Metabolism	CG	0.000473783	-0.276842	0.369123	decrease
	N-acetylglucosaminylasparagine	Carbohydrate	Aminosugar Metabolism	CG	0.000635223	-0.10584	0.14112	decrease
	3-hydroxysuberate	Lipid	Fatty Acid, Monohydroxy	OG	0.000664812	0.236504	-0.315338	increase
	2-methylcitrate/homocitrate	Energy	TCA Cycle	CG	0.000709819	-0.170052	0.226736	decrease
	trans-4-hydroxyproline	Amino Acid	Urea cycle; Arginine and Proline Metabolism	CG	0.000942914	-0.127039	0.169385	decrease
	apiin	Xenobiotics	Food Component/Plant	OG	0.00096462	0.157516	-0.210021	increase
	gamma-glutamylalanine	Peptide	Gamma-glutamyl Amino Acid	CG	0.000983541	-0.117441	0.156589	decrease
	itaconate	Energy	TCA Cycle	CG	0.00105008	-0.358836	0.478448	decrease
	5-acetylamino-6-formylamino-3-methyluracil	Xenobiotics	Xanthine Metabolism	CG	0.00108726	-0.238457	0.317943	decrease
	diosmetin	Xenobiotics	Food Component/Plant	OG	0.0013392	0.0445657	-0.0594209	increase
	hesperetin	Xenobiotics	Food Component/Plant	CG	0.00138254	-0.0910213	0.121362	decrease
	N-delta-acetylornithine	Amino Acid	Urea cycle; Arginine and Proline Metabolism	CG	0.00138611	-0.36996	0.49328	decrease
	2-hydroxyphenylacetate	Amino Acid	Phenylalanine Metabolism	OG	0.00140358	0.109183	-0.145578	increase
	protoporphyrin IX	Cofactors and Vitamins	Hemoglobin and Porphyrin Metabolism	OG	0.00152919	0.249886	-0.333182	increase
	adipate (C6-DC)	Lipid	Fatty Acid, Dicarboxylate	OG	0.00172005	0.118833	-0.158444	increase
	4-hydroxyglutamate	Amino Acid	Glutamate Metabolism	OG	0.00194368	0.0408369	-0.0544492	increase
	2-aminophenol sulfate	Xenobiotics	Food Component/Plant	OG	0.001944	0.203085	-0.270781	increase
	gamma-glutamyltyrosine	Peptide	Gamma-glutamyl Amino Acid	CG	0.00198501	-0.320847	0.427796	decrease
	(14 or 15)-methylpalmitate (a17:0 or i17:0)	Lipid	Fatty Acid, Branched	OG	0.00209799	0.0959686	-0.127958	increase
	N-acetylarginine	Amino Acid	Urea cycle; Arginine and Proline Metabolism	CG	0.00219083	-0.110288	0.147051	decrease
	linoleoyl ethanolamide	Lipid	Endocannabinoid	OG	0.00229166	0.456403	-0.608538	increase
	N-methyltaurine	Amino Acid	Methionine, Cysteine, SAM and Taurine Metabolism	OG	0.00229843	0.144796	-0.193061	increase
	3-hydroxystearate	Lipid	Fatty Acid, Monohydroxy	OG	0.00231516	0.148584	-0.198112	increase
	propionylglycine	Lipid	Fatty Acid Metabolism (also BCAA Metabolism)	OG	0.00243539	0.0882693	-0.117692	increase
	norvaline	Amino Acid	Urea cycle; Arginine and Proline Metabolism	CG	0.00247209	-0.00899945	0.0119993	decrease
	3-ureidopropionate	Nucleotide	Pyrimidine Metabolism, Uracil containing	CG	0.00257863	-0.0869023	0.11587	decrease
	androstenediol (3alpha, 17alpha) monosulfate (2)	Lipid	Androgenic Steroids	CG	0.00263668	-0.026999	0.0359986	decrease
	5-hydroxyindoleacetate	Amino Acid	Tryptophan Metabolism	OG	0.00271126	0.153626	-0.204834	increase
	lignoceroyl ethanolamide (24:0)*	Lipid	Endocannabinoid	CG	0.00278622	-0.0881023	0.11747	decrease
	ceramide (d18:2/16:0, d18:1/16:1, d16:1/18:1)*	Lipid	Ceramides	OG	0.00293467	0.100796	-0.134394	increase
	palmitoleate (16:1n7)	Lipid	Long Chain Monounsaturated Fatty Acid	OG	0.00298492	0.0836081	-0.111477	increase
	1-oleoyl-GPI (18:1)	Lipid	Lysophospholipid	OG	0.00317633	0.323951	-0.431934	increase
	1-palmitoyl-sulfoquinovopyranosyl-glycerol (16:0)*	Lipid	Monoacylglycerol	OG	0.00325122	0.0203197	-0.0270929	increase
	3-hydroxyhexanoate	Lipid	Fatty Acid, Monohydroxy	CG	0.00331195	-0.409614	0.546152	decrease
	2'-deoxycytidine 5'-monophosphate	Nucleotide	Pyrimidine Metabolism, Cytidine containing	OG	0.00335088	0.110276	-0.147035	increase
	glutamine_degradant*	Partially Characterized Molecules	Partially Characterized Molecules	OG	0.00336299	0.0708247	-0.0944329	increase
	2-acetamidophenol sulfate	Xenobiotics	Food Component/Plant	OG	0.00338784	0.128638	-0.171517	increase
	ornithine	Amino Acid	Urea cycle; Arginine and Proline Metabolism	CG	0.00349972	-0.093067	0.124089	decrease
	(15:2)-anacardic acid	Xenobiotics	Food Component/Plant	OG	0.00360305	0.174559	-0.232745	increase
	caffeine	Xenobiotics	Xanthine Metabolism	CG	0.0036033	-0.31109	0.414786	decrease
	oleoyl-linolenoyl-glycerol (18:1/18:3) [2]*	Lipid	Diacylglycerol	CG	0.0036592	-0.0718278	0.0957704	decrease
	4-hydroxybutyrate (GHB)	Lipid	Fatty Acid, Monohydroxy	OG	0.00367062	0.0576423	-0.0768564	increase
	1-(1-enyl-palmitoyl)-GPC (P-16:0)*	Lipid	Lysoplasmalogen	OG	0.00372556	0.143309	-0.191079	increase
	1,2-dilinolenoyl-galactosylglycerol (18:3/18:3)*	Lipid	Galactosyl Glycerolipids	CG	0.00376187	-0.00665694	0.00887592	decrease
	glutamyl-meso-diaminopimelate	Xenobiotics	Bacterial/Fungal	CG	0.00384418	-0.177362	0.236482	decrease
	agmatine	Amino Acid	Polyamine Metabolism	CG	0.00410191	-0.57999	0.77332	decrease
	1-palmityl-GPE (O-16:0)*	Lipid	Lysoplasmalogen	OG	0.00420067	0.141737	-0.188982	increase
	2-pyrrolidinone	Amino Acid	Glutamate Metabolism	CG	0.00421672	-0.143217	0.190956	decrease
	3-(2-hydroxyphenyl)propionate	Xenobiotics	Benzoate Metabolism	CG	0.00456256	-0.0876425	0.116857	decrease
	N-acetylcysteine	Amino Acid	Methionine, Cysteine, SAM and Taurine Metabolism	OG	0.00458713	0.188366	-0.251155	increase
	cyclo(pro-tyr)	Peptide	Dipeptide	CG	0.00460977	-0.485078	0.64677	decrease
	uracil	Nucleotide	Pyrimidine Metabolism, Uracil containing	CG	0.00472218	-0.197581	0.263442	decrease
	urolithin B	Xenobiotics	Bacterial/Fungal	CG	0.0047759	-0.091172	0.121563	decrease
	3-dehydroshikimate	Xenobiotics	Food Component/Plant	CG	0.00483663	-0.302623	0.403498	decrease
	gamma-glutamylthreonine	Peptide	Gamma-glutamyl Amino Acid	CG	0.00486767	-0.0233029	0.0310705	decrease
	ferulic acid 4-sulfate	Xenobiotics	Food Component/Plant	CG	0.0049449	-0.109589	0.146119	decrease
	histamine	Amino Acid	Histidine Metabolism	OG	0.00494801	0.0133729	-0.0178306	increase
	laurate (12:0)	Lipid	Medium Chain Fatty Acid	CG	0.00512869	-0.227653	0.303537	decrease
	2-methylserine	Amino Acid	Glycine, Serine and Threonine Metabolism	CG	0.00541641	-0.243667	0.32489	decrease
	dodecenedioate (C12:1-DC)*	Lipid	Fatty Acid, Dicarboxylate	CG	0.00561615	-0.0703067	0.0937423	decrease
	4-allylcatechol sulfate	Xenobiotics	Benzoate Metabolism	CG	0.00583757	-0.169765	0.226353	decrease
	undecanedioate (C11-DC)	Lipid	Fatty Acid, Dicarboxylate	CG	0.00584216	-0.127811	0.170414	decrease
	methylsuccinate	Amino Acid	Leucine, Isoleucine and Valine Metabolism	CG	0.00586301	-0.18022	0.240293	decrease
	palmitoyl-oleoyl-glycerol (16:0/18:1) [1]*	Lipid	Diacylglycerol	OG	0.00592154	0.213576	-0.284768	increase
	palmitoleoylcarnitine (C16:1)*	Lipid	Fatty Acid Metabolism (Acyl Carnitine, Monounsaturated)	CG	0.00605787	-0.0229004	0.0305339	decrease
	thymidine	Nucleotide	Pyrimidine Metabolism, Thymine containing	CG	0.00613348	-0.469112	0.625482	decrease
	diacylglycerol (14:0/18:1, 16:0/16:1) [1]*	Lipid	Diacylglycerol	CG	0.00630698	-0.390556	0.520742	decrease
	ginkgolic acid C15:1	Xenobiotics	Food Component/Plant	OG	0.00636848	0.207265	-0.276354	increase
	diethyl phosphate	Xenobiotics	Chemical	CG	0.00644007	-0.237031	0.316041	decrease
	N-formylanthranilic acid	Amino Acid	Tryptophan Metabolism	OG	0.00645525	0.176218	-0.234957	increase
	alpha-ketoglutaramate*	Amino Acid	Glutamate Metabolism	CG	0.00657382	-0.388438	0.517918	decrease
	butyrylputrescine/isobutyrylputrescine	Amino Acid	Polyamine Metabolism	OG	0.00657496	0.213007	-0.284009	increase
	N-acetylhistidine	Amino Acid	Histidine Metabolism	CG	0.00663487	-0.241535	0.322047	decrease
	ala-leu-ala	Peptide	Polypeptide	OG	0.00664694	0.0813532	-0.108471	increase
	1,2-dilinoleoyl-GPC (18:2/18:2)	Lipid	Phosphatidylcholine (PC)	OG	0.00665419	0.259199	-0.345599	increase
	calystegine A3	Xenobiotics	Food Component/Plant	OG	0.00688344	0.166885	-0.222513	increase
	dihydrocaffeate	Xenobiotics	Food Component/Plant	CG	0.00727904	-0.0948328	0.126444	decrease
	isoleucylglycine	Peptide	Dipeptide	OG	0.00734834	0.275628	-0.367504	increase
	2,4,6-trihydroxybenzoate	Xenobiotics	Benzoate Metabolism	CG	0.00745983	-0.0631814	0.0842419	decrease
	5-hydroxymethylfurfural	Xenobiotics	Food Component/Plant	CG	0.0074682	-0.367406	0.489875	decrease
	N-carbamoylputrescine	Amino Acid	Polyamine Metabolism	CG	0.0075926	-0.461619	0.615493	decrease
	2-iminopiperidine	Xenobiotics	Chemical	CG	0.00780027	-0.226417	0.30189	decrease
	N,N-dimethylalanine	Amino Acid	Alanine and Aspartate Metabolism	CG	0.00802403	-0.364403	0.48587	decrease
	indoleacetate	Amino Acid	Tryptophan Metabolism	OG	0.00808437	0.129144	-0.172192	increase
	1,2-dilinoleoyl-galactosylglycerol (18:2/18:2)*	Lipid	Galactosyl Glycerolipids	CG	0.00819242	-0.22278	0.29704	decrease
	pyridoxamine	Cofactors and Vitamins	Vitamin B6 Metabolism	CG	0.0081943	-0.250952	0.334603	decrease
	caprate (10:0)	Lipid	Medium Chain Fatty Acid	CG	0.00819907	-0.352011	0.469348	decrease
	cytidine 2',3'-cyclic monophosphate	Nucleotide	Pyrimidine Metabolism, Cytidine containing	CG	0.00821325	-0.099346	0.132461	decrease
	o-tyrosine	Amino Acid	Tyrosine Metabolism	OG	0.00825028	0.250927	-0.334569	increase
	3-hydroxymargaroylglycine	Lipid	Fatty Acid Metabolism (Acyl Glycine)	CG	0.0083921	-0.00298421	0.00397895	decrease
	1-myristoyl-GPE (14:0)	Lipid	Lysophospholipid	CG	0.00848505	-0.501774	0.669032	decrease
	nicotinate ribonucleoside	Cofactors and Vitamins	Nicotinate and Nicotinamide Metabolism	OG	0.00869248	0.133534	-0.178045	increase
	fructosyllysine	Amino Acid	Lysine Metabolism	CG	0.00880571	-0.332632	0.443509	decrease
	N-acetylthreonine	Amino Acid	Glycine, Serine and Threonine Metabolism	CG	0.0088852	-0.365932	0.487909	decrease
	N-myristoyltaurine*	Lipid	Endocannabinoid	OG	0.00902233	0.115458	-0.153944	increase
	N('1)-acetylspermidine	Amino Acid	Polyamine Metabolism	CG	0.00906892	-0.258902	0.345203	decrease
	isocitric lactone	Energy	TCA Cycle	CG	0.0091684	-0.206373	0.275164	decrease
	flavin adenine dinucleotide (FAD)	Cofactors and Vitamins	Riboflavin Metabolism	OG	0.00918683	0.0573332	-0.0764443	increase
	bilirubin degradation product, C16H18N2O5 (3)**	Partially Characterized Molecules	Partially Characterized Molecules	OG	0.00937962	0.265986	-0.354648	increase
	1-methyladenine	Nucleotide	Purine Metabolism, Adenine containing	OG	0.00963953	0.207142	-0.276189	increase
	4-hydroxycinnamate sulfate	Amino Acid	Tyrosine Metabolism	CG	0.00966073	-0.142163	0.189551	decrease
	valylleucine	Peptide	Dipeptide	OG	0.00966933	0.373623	-0.498164	increase
	docosapentaenoate (n6 DPA; 22:5n6)	Lipid	Long Chain Polyunsaturated Fatty Acid (n3 and n6)	OG	0.00968647	0.0202921	-0.0270562	increase
	dihydroferulate	Xenobiotics	Food Component/Plant	CG	0.00969605	-0.149565	0.19942	decrease
	levulinate (4-oxovalerate)	Xenobiotics	Food Component/Plant	CG	0.00992397	-0.0528008	0.0704011	decrease
	1,3-propanediol	Xenobiotics	Chemical	CG	0.0100707	-0.0731421	0.0975228	decrease
	nicotinamide adenine dinucleotide (NAD+)	Cofactors and Vitamins	Nicotinate and Nicotinamide Metabolism	OG	0.0102771	0.0636544	-0.0848726	increase
	tribuloside	Xenobiotics	Food Component/Plant	CG	0.0102799	-0.0561375	0.07485	decrease
	hexanoylglutamine	Lipid	Fatty Acid Metabolism (Acyl Glutamine)	CG	0.0102981	-0.21905	0.292067	decrease
	dodecanedioate (C12-DC)	Lipid	Fatty Acid, Dicarboxylate	CG	0.0103682	-0.349616	0.466154	decrease
	5,6-dihydrouridine	Nucleotide	Pyrimidine Metabolism, Uracil containing	CG	0.0107602	-0.0952365	0.126982	decrease
	1-palmitoyl-2-palmitoleoyl-GPE (16:0/16:1)*	Lipid	Phosphatidylethanolamine (PE)	CG	0.0108845	-0.504284	0.672378	decrease
	sphingosine	Lipid	Sphingosines	OG	0.0110607	0.194857	-0.259809	increase
	(3'-5')-uridylylcytidine*	Nucleotide	Dinucleotide	OG	0.0111794	0.103094	-0.137458	increase
	(3'-5')-adenylyluridine	Nucleotide	Dinucleotide	OG	0.0111954	0.114481	-0.152641	increase
	ala-ile-ala	Peptide	Polypeptide	CG	0.011244	-0.133269	0.177691	decrease
	1-palmitoyl-GPI (16:0)	Lipid	Lysophospholipid	OG	0.0112554	0.363151	-0.484201	increase
	lactate	Carbohydrate	Glycolysis, Gluconeogenesis, and Pyruvate Metabolism	OG	0.0112682	0.180975	-0.2413	increase
	digalactosylglycerol*	Lipid	Galactosyl Glycerolipids	CG	0.0113843	-0.246206	0.328275	decrease
	pyridoxate	Cofactors and Vitamins	Vitamin B6 Metabolism	OG	0.0115195	0.564375	-0.7525	increase
	astaxanthin	Cofactors and Vitamins	Vitamin A Metabolism	CG	0.0115282	-0.426676	0.568902	decrease
	sedoheptulose	Carbohydrate	Pentose Metabolism	CG	0.0115665	-0.032944	0.0439253	decrease
	N-methylglutamate	Amino Acid	Glutamate Metabolism	CG	0.0117298	-0.362295	0.483061	decrease
	kynurenate	Amino Acid	Tryptophan Metabolism	CG	0.0118868	-0.0359629	0.0479506	decrease
	1-linolenoyl-2-hexadecatrienoyl-galactosylglycerol (18:3/16:3)	Lipid	Galactosyl Glycerolipids	OG	0.0120897	0.175957	-0.234609	increase
	arachidonate (20:4n6)	Lipid	Long Chain Polyunsaturated Fatty Acid (n3 and n6)	CG	0.0122951	-0.0240001	0.0320002	decrease
	tridecenedioate (C13:1-DC)*	Lipid	Fatty Acid, Dicarboxylate	CG	0.0123548	-0.254345	0.339126	decrease
	undecenoylcarnitine (C11:1)	Lipid	Fatty Acid Metabolism (Acyl Carnitine, Monounsaturated)	OG	0.0123708	0.326198	-0.434931	increase
	5-hydroxyhexanoate	Lipid	Fatty Acid, Monohydroxy	CG	0.0125151	-0.219273	0.292364	decrease
	pterin	Cofactors and Vitamins	Pterin Metabolism	OG	0.0126578	0.168519	-0.224692	increase
	guanine	Nucleotide	Purine Metabolism, Guanine containing	OG	0.0126887	0.260751	-0.347668	increase
	carboxyethyl-GABA	Amino Acid	Glutamate Metabolism	OG	0.0127823	0.146555	-0.195407	increase
	chenodeoxycholate	Lipid	Primary Bile Acid Metabolism	CG	0.0129778	-0.0360857	0.0481143	decrease
	N-methylhydantoin	Amino Acid	Creatine Metabolism	CG	0.0130196	-0.257351	0.343135	decrease
	3-hydroxybutyrate (BHBA)	Lipid	Ketone Bodies	OG	0.0130322	0.209071	-0.278761	increase
	3-(3-hydroxyphenyl)propionate	Xenobiotics	Benzoate Metabolism	CG	0.0130346	-0.266424	0.355232	decrease
	N-palmitoyl-sphingadienine (d18:2/16:0)*	Lipid	Ceramides	CG	0.0131676	-0.0820108	0.109348	decrease
	2-hydroxypalmitate	Lipid	Fatty Acid, Monohydroxy	OG	0.0133785	0.0366791	-0.0489055	increase
	xanthurenate	Amino Acid	Tryptophan Metabolism	CG	0.013505	-0.166534	0.222045	decrease
	1-linoleoyl-GPI (18:2)*	Lipid	Lysophospholipid	OG	0.0138747	0.333394	-0.444525	increase
	9,10-DiHOME sulfate	Lipid	Fatty Acid, Dihydroxy	CG	0.0139117	-0.0379826	0.0506434	decrease
	dihomo-linolenate (20:3n3 or n6)	Lipid	Long Chain Polyunsaturated Fatty Acid (n3 and n6)	CG	0.0140693	-0.183923	0.24523	decrease
	N6-methyllysine	Amino Acid	Lysine Metabolism	OG	0.0142124	0.116342	-0.155122	increase
	N-palmitoyl-sphinganine (d18:0/16:0)	Lipid	Dihydroceramides	CG	0.0142402	-0.0336305	0.0448407	decrease
	N6-carbamoylthreonyladenosine	Nucleotide	Purine Metabolism, Adenine containing	CG	0.0143244	-0.340719	0.454292	decrease
	N-acetylneuraminate	Carbohydrate	Aminosugar Metabolism	CG	0.0145468	-0.0110816	0.0147755	decrease
	chrysoeriol (3'-O-methylluteolin)	Xenobiotics	Food Component/Plant	CG	0.0147976	-0.0932994	0.124399	decrease
	sphingomyelin (d18:1/17:0, d17:1/18:0, d19:1/16:0)	Lipid	Sphingomyelins	CG	0.0150313	-0.0062606	0.00834747	decrease
	ascorbic acid 2-sulfate	Cofactors and Vitamins	Ascorbate and Aldarate Metabolism	OG	0.0150594	0.152591	-0.203454	increase
	1-myristoyl-GPI (14:0)*	Lipid	Lysophospholipid	OG	0.0151079	0.211878	-0.282504	increase
	N-acetylmethionine sulfoxide	Amino Acid	Methionine, Cysteine, SAM and Taurine Metabolism	OG	0.0151206	0.158504	-0.211339	increase
	apigenin	Xenobiotics	Food Component/Plant	OG	0.0151533	0.131085	-0.17478	increase
	arabonate/xylonate	Carbohydrate	Pentose Metabolism	CG	0.0152936	-0.188262	0.251016	decrease
	N-butyryl-leucine	Amino Acid	Leucine, Isoleucine and Valine Metabolism	CG	0.0153814	-0.00706407	0.00941876	decrease
	daidzein	Xenobiotics	Food Component/Plant	CG	0.0155655	-0.122624	0.163499	decrease
	pheophytin A	Xenobiotics	Food Component/Plant	CG	0.0155867	-0.30493	0.406574	decrease
	cis-urocanate	Amino Acid	Histidine Metabolism	OG	0.0156122	0.101352	-0.135136	increase
	phenyllactate (PLA)	Amino Acid	Phenylalanine Metabolism	CG	0.015621	-0.101428	0.135238	decrease
	gamma-tocopherol/beta-tocopherol	Cofactors and Vitamins	Tocopherol Metabolism	CG	0.0158286	-0.211986	0.282648	decrease
	gentisate	Amino Acid	Tyrosine Metabolism	CG	0.0158347	-0.0927419	0.123656	decrease
	10-nonadecenoate (19:1n9)	Lipid	Long Chain Monounsaturated Fatty Acid	OG	0.0158378	0.0709062	-0.0945416	increase
	gamma-tocotrienol	Cofactors and Vitamins	Tocopherol Metabolism	CG	0.0159439	-0.237562	0.316749	decrease
	rosmarinate	Xenobiotics	Food Component/Plant	OG	0.0161864	0.292055	-0.389406	increase
	4-ethylcatechol sulfate	Xenobiotics	Benzoate Metabolism	CG	0.0164798	-0.266255	0.355007	decrease
	hexanoylglycine	Lipid	Fatty Acid Metabolism (Acyl Glycine)	OG	0.0164859	0.123938	-0.165251	increase
	4-imidazoleacetate	Amino Acid	Histidine Metabolism	CG	0.0165526	-0.18088	0.241173	decrease
	succinate	Energy	TCA Cycle	CG	0.0166784	-0.343483	0.457978	decrease
	glutaminylleucine	Peptide	Dipeptide	OG	0.0167238	0.162255	-0.216339	increase
	thymine	Nucleotide	Pyrimidine Metabolism, Thymine containing	CG	0.0169901	-0.336509	0.448678	decrease
	pantoate	Cofactors and Vitamins	Pantothenate and CoA Metabolism	CG	0.0170228	-0.0827921	0.110389	decrease
	3-phenylpropionate (hydrocinnamate)	Xenobiotics	Benzoate Metabolism	CG	0.0171322	-0.366097	0.48813	decrease
	alpha-tocopherol	Cofactors and Vitamins	Tocopherol Metabolism	CG	0.0173349	-0.474802	0.633069	decrease
	secoisolariciresinol	Xenobiotics	Food Component/Plant	OG	0.0173516	0.10661	-0.142147	increase
	N-acetylcitrulline	Amino Acid	Urea cycle; Arginine and Proline Metabolism	OG	0.0174055	0.0191793	-0.0255725	increase
	cadaverine	Amino Acid	Lysine Metabolism	OG	0.0174193	0.0678592	-0.090479	increase
	pseudouridine	Nucleotide	Pyrimidine Metabolism, Uracil containing	OG	0.0175355	0.100194	-0.133592	increase
	fumarate	Energy	TCA Cycle	OG	0.0175627	0.144441	-0.192589	increase
	1-palmitoylglycerol (16:0)	Lipid	Monoacylglycerol	CG	0.0175851	-0.0665229	0.0886973	decrease
	ciliatine (2-aminoethylphosphonate)	Xenobiotics	Food Component/Plant	OG	0.0175988	0.208888	-0.278517	increase
	p-cresol sulfate	Xenobiotics	Benzoate Metabolism	CG	0.0177156	-0.180875	0.241167	decrease
	indolepropionate	Amino Acid	Tryptophan Metabolism	CG	0.017821	-0.602958	0.803943	decrease
	sucrose	Carbohydrate	Disaccharides and Oligosaccharides	OG	0.017838	0.253529	-0.338039	increase
	phenylacetylglutamine	Peptide	Acetylated Peptides	OG	0.0179002	0.21621	-0.28828	increase
	leucylglycine	Peptide	Dipeptide	OG	0.0179251	0.161682	-0.215576	increase
	nicotinamide	Cofactors and Vitamins	Nicotinate and Nicotinamide Metabolism	OG	0.017967	0.0925848	-0.123446	increase
	N-carbamoylaspartate	Nucleotide	Pyrimidine Metabolism, Orotate containing	OG	0.0180165	0.0409316	-0.0545755	increase
	1,2-dipalmitoyl-GPE (16:0/16:0)*	Lipid	Phosphatidylethanolamine (PE)	CG	0.018082	-0.159899	0.213199	decrease
	hexadecadienoate (16:2n6)	Lipid	Long Chain Polyunsaturated Fatty Acid (n3 and n6)	OG	0.0180868	0.0469839	-0.0626453	increase
	palmitoyl-linoleoyl-glycerol (16:0/18:2) [1]*	Lipid	Diacylglycerol	OG	0.0181993	0.442627	-0.590169	increase
	3,7-dimethylurate	Xenobiotics	Xanthine Metabolism	CG	0.0182114	-0.0021389	0.00285186	decrease
	docosapentaenoate (n3 DPA; 22:5n3)	Lipid	Long Chain Polyunsaturated Fatty Acid (n3 and n6)	CG	0.0184745	-0.192081	0.256108	decrease
	N2,N6-diacetyllysine	Amino Acid	Lysine Metabolism	CG	0.0185455	-0.173044	0.230725	decrease
	beta-guanidinopropanoate	Xenobiotics	Food Component/Plant	CG	0.0185692	-0.011576	0.0154347	decrease
	ponciretin	Xenobiotics	Food Component/Plant	CG	0.0185843	-0.248725	0.331633	decrease
	N-acetylputrescine	Amino Acid	Polyamine Metabolism	CG	0.0186783	-0.0196503	0.0262004	decrease
	uridine-2',3'-cyclic monophosphate	Nucleotide	Pyrimidine Metabolism, Uracil containing	OG	0.0187254	0.0367618	-0.0490158	increase
	arginine	Amino Acid	Urea cycle; Arginine and Proline Metabolism	CG	0.0187322	-0.407115	0.54282	decrease
	N-palmitoyl-phytosphingosine (t18:0/16:0)	Lipid	Dihydroceramides	CG	0.0187459	-0.016365	0.02182	decrease
	10-heptadecenoate (17:1n7)	Lipid	Long Chain Monounsaturated Fatty Acid	OG	0.0188327	0.208342	-0.277789	increase
	acetylcholine	Lipid	Neurotransmitter	CG	0.0189231	-0.331811	0.442415	decrease
	arabinose	Carbohydrate	Pentose Metabolism	OG	0.0190319	0.123998	-0.165331	increase
	N2,N2-dimethylguanine	Nucleotide	Purine Metabolism, Guanine containing	CG	0.0190956	-0.276515	0.368687	decrease
	myristate (14:0)	Lipid	Long Chain Saturated Fatty Acid	OG	0.0191329	0.0142404	-0.0189872	increase
	1-methyl-beta-carboline-3-carboxylic acid	Xenobiotics	Food Component/Plant	CG	0.0193289	-0.332898	0.443864	decrease
	(12 or 13)-methylmyristate (a15:0 or i15:0)	Lipid	Fatty Acid, Branched	OG	0.0197048	0.0872937	-0.116392	increase
	orotate	Nucleotide	Pyrimidine Metabolism, Orotate containing	OG	0.0197348	0.192368	-0.256491	increase
	N-oleoyltaurine	Lipid	Endocannabinoid	OG	0.019929	0.147668	-0.19689	increase
	isovalerylphenylalanine	Amino Acid	Tyrosine Metabolism	OG	0.0199597	0.360834	-0.481112	increase
	2-oxo-1-pyrrolidinepropionate	Xenobiotics	Chemical	CG	0.0199645	-0.57587	0.767826	decrease
	methylmalonate (MMA)	Lipid	Fatty Acid Metabolism (also BCAA Metabolism)	OG	0.0199777	0.0788507	-0.105134	increase
	hypoxanthine	Nucleotide	Purine Metabolism, (Hypo)Xanthine/Inosine containing	OG	0.0202074	0.000935968	-0.00124796	increase
	syringaldehyde	Xenobiotics	Food Component/Plant	CG	0.0202908	-0.348481	0.464641	decrease
	guanosine-2',3'-cyclic monophosphate	Nucleotide	Purine Metabolism, Guanine containing	OG	0.0204518	0.0532087	-0.070945	increase
	1-linoleoyl-GPG (18:2)*	Lipid	Lysophospholipid	OG	0.0204837	0.0851377	-0.113517	increase
	3-hydroxyoleate*	Lipid	Fatty Acid, Monohydroxy	OG	0.0208446	0.267476	-0.356634	increase
	heptadecasphingosine (d17:1)	Lipid	Sphingosines	CG	0.0208589	-0.0509618	0.0679491	decrease
	maltotriose	Carbohydrate	Glycogen Metabolism	CG	0.0208615	-0.478506	0.638008	decrease
	1-methylxanthine	Xenobiotics	Xanthine Metabolism	OG	0.0210993	0.22617	-0.30156	increase
	3-hydroxyphenylacetate	Amino Acid	Phenylalanine Metabolism	CG	0.0211222	-0.580496	0.773995	decrease
	p-aminobenzoate (PABA)	Xenobiotics	Benzoate Metabolism	OG	0.0212208	0.285554	-0.380738	increase
	stigmastadienone	Lipid	Sterol	CG	0.0213899	-0.005801	0.00773466	decrease
	3,4-dihydroxyphenylacetate	Amino Acid	Tyrosine Metabolism	OG	0.021571	0.0421385	-0.0561846	increase
	galactonate	Carbohydrate	Fructose, Mannose and Galactose Metabolism	OG	0.0220153	0.230957	-0.307943	increase
	4-hydroxyphenylacetate	Amino Acid	Phenylalanine Metabolism	OG	0.0221165	0.059103	-0.078804	increase
	N,N-dimethyl-5-aminovalerate	Amino Acid	Lysine Metabolism	CG	0.0221169	-0.161435	0.215247	decrease
	5-methylthioadenosine (MTA)	Amino Acid	Polyamine Metabolism	CG	0.0221254	-0.230878	0.307837	decrease
	D-urobilin	Cofactors and Vitamins	Hemoglobin and Porphyrin Metabolism	CG	0.0223906	-0.209228	0.278971	decrease
	11-ketoetiocholanolone sulfate	Lipid	Androgenic Steroids	CG	0.022406	-0.161982	0.215976	decrease
	octadecenedioate (C18:1-DC)	Lipid	Fatty Acid, Dicarboxylate	CG	0.0224796	-0.0947136	0.126285	decrease
	valerylphenylalanine	Amino Acid	Phenylalanine Metabolism	CG	0.0225177	-0.00472871	0.00630495	decrease
	(15:0)-anacardic acid	Xenobiotics	Food Component/Plant	CG	0.0225328	-0.0696564	0.0928751	decrease
	triethanolamine	Xenobiotics	Chemical	CG	0.0225464	-0.409287	0.545717	decrease
	alpha-tocotrienol	Cofactors and Vitamins	Tocopherol Metabolism	OG	0.022599	0.283551	-0.378068	increase
	hexadecasphingosine (d16:1)*	Lipid	Sphingosines	OG	0.0226592	0.179892	-0.239856	increase
	cytosine	Nucleotide	Pyrimidine Metabolism, Cytidine containing	OG	0.0227174	0.0401131	-0.0534842	increase
	sphingomyelin (d18:1/14:0, d16:1/16:0)*	Lipid	Sphingomyelins	CG	0.0227479	-0.263615	0.351487	decrease
	4-guanidinobutanoate	Amino Acid	Guanidino and Acetamido Metabolism	CG	0.0227826	-0.1903	0.253734	decrease
	alpha-glutamylglutamate	Peptide	Dipeptide	OG	0.0227987	0.0524264	-0.0699018	increase
	2,3-dihydroxy-2-methylbutyrate	Amino Acid	Leucine, Isoleucine and Valine Metabolism	CG	0.022812	-0.213863	0.285151	decrease
	N-butyryl-phenylalanine	Amino Acid	Phenylalanine Metabolism	OG	0.0228248	0.102649	-0.136865	increase
	stearate (18:0)	Lipid	Long Chain Saturated Fatty Acid	OG	0.0228759	0.151199	-0.201599	increase
	diethanolamine	Xenobiotics	Chemical	CG	0.0229154	-0.194502	0.259336	decrease
	maltose	Carbohydrate	Glycogen Metabolism	CG	0.0229173	-0.309102	0.412136	decrease
	guanosine	Nucleotide	Purine Metabolism, Guanine containing	CG	0.0231034	-0.258218	0.344291	decrease
	2-methyl-proline	Amino Acid	Urea cycle; Arginine and Proline Metabolism	CG	0.0231946	-0.320916	0.427888	decrease
	kynurenine	Amino Acid	Tryptophan Metabolism	OG	0.023254	0.17872	-0.238294	increase
	heptanoate (7:0)	Lipid	Medium Chain Fatty Acid	CG	0.023309	-0.376504	0.502005	decrease
	1-palmitoyl-2-linoleoyl-GPE (16:0/18:2)	Lipid	Phosphatidylethanolamine (PE)	CG	0.0233469	-0.290169	0.386892	decrease
	1-linoleoyl-2-linolenoyl-GPC (18:2/18:3)*	Lipid	Phosphatidylcholine (PC)	OG	0.0233895	0.0521141	-0.0694855	increase
	stearidonate (18:4n3)	Lipid	Long Chain Polyunsaturated Fatty Acid (n3 and n6)	OG	0.0234787	0.294469	-0.392626	increase
	trizma acetate	Xenobiotics	Chemical	CG	0.0236058	-0.385197	0.513596	decrease
	alanylleucine	Peptide	Dipeptide	OG	0.0236343	0.404239	-0.538986	increase
	glycerol	Lipid	Glycerolipid Metabolism	OG	0.0237232	0.157465	-0.209953	increase
	hexanoyltaurine	Lipid	Endocannabinoid	CG	0.0237374	-0.120065	0.160087	decrease
	hexadecanedioate (C16-DC)	Lipid	Fatty Acid, Dicarboxylate	CG	0.0239201	-0.046568	0.0620906	decrease
	N-palmitoyltaurine	Lipid	Endocannabinoid	OG	0.0240225	0.163032	-0.217376	increase
	(16 or 17)-methylstearate (a19:0 or i19:0)	Lipid	Fatty Acid, Branched	OG	0.0243703	0.0472606	-0.0630141	increase
	glycylleucine	Peptide	Dipeptide	OG	0.0243822	0.408829	-0.545106	increase
	pentose acid*	Partially Characterized Molecules	Partially Characterized Molecules	CG	0.0245536	-0.156999	0.209332	decrease
	sulfate*	Xenobiotics	Chemical	CG	0.0246743	-0.250122	0.333496	decrease
	saccharin	Xenobiotics	Food Component/Plant	CG	0.0250577	-0.204184	0.272246	decrease
	eicosapentaenoate (EPA; 20:5n3)	Lipid	Long Chain Polyunsaturated Fatty Acid (n3 and n6)	CG	0.0250742	-0.0739092	0.0985455	decrease
	2-aminoheptanoate	Lipid	Fatty Acid, Amino	OG	0.0252607	0.1994	-0.265867	increase
	2-hydroxylignocerate*	Lipid	Fatty Acid, Monohydroxy	OG	0.0253006	0.394473	-0.525964	increase
	heptadecatrienoate (17:3)*	Lipid	Long Chain Polyunsaturated Fatty Acid (n3 and n6)	CG	0.0259273	-0.0487921	0.0650562	decrease
	2-aminophenol	Xenobiotics	Food Component/Plant	OG	0.0259626	0.404978	-0.53997	increase
	urolithin A	Xenobiotics	Bacterial/Fungal	OG	0.0261702	0.155798	-0.207731	increase
	syringic acid	Xenobiotics	Food Component/Plant	CG	0.0262414	-0.004622	0.00616267	decrease
	enterolactone	Xenobiotics	Food Component/Plant	CG	0.0262479	-0.232705	0.310273	decrease
	caproate (6:0)	Lipid	Medium Chain Fatty Acid	CG	0.0262997	-0.419462	0.559283	decrease
	theobromine	Xenobiotics	Xanthine Metabolism	CG	0.0263228	-0.0644186	0.0858914	decrease
	sinapate	Xenobiotics	Food Component/Plant	OG	0.0264369	0.259139	-0.345518	increase
	N-methyltryptophan	Amino Acid	Tryptophan Metabolism	CG	0.0264483	-0.23856	0.31808	decrease
	hydroxymethylpyrimidine	Cofactors and Vitamins	Thiamine Metabolism	CG	0.0266528	-0.205225	0.273633	decrease
	(S)-a-amino-omega-caprolactam	Xenobiotics	Food Component/Plant	CG	0.0266546	-0.197854	0.263805	decrease
	3beta-hydroxy-5-cholestenoate	Lipid	Sterol	CG	0.0267026	-0.281818	0.375757	decrease
	sphingadienine	Lipid	Sphingolipid Synthesis	OG	0.0268402	0.454075	-0.605433	increase
	malate	Energy	TCA Cycle	OG	0.0269512	0.138904	-0.185205	increase
	beta-alanine	Nucleotide	Pyrimidine Metabolism, Uracil containing	CG	0.0269682	-0.384372	0.512496	decrease
	choline	Lipid	Phospholipid Metabolism	OG	0.0269798	0.361391	-0.481854	increase
	isoxanthohumol	Xenobiotics	Food Component/Plant	CG	0.0273336	-0.200248	0.266998	decrease
	fructose	Carbohydrate	Fructose, Mannose and Galactose Metabolism	OG	0.0278189	0.129329	-0.172439	increase
	2'-O-methyluridine	Nucleotide	Pyrimidine Metabolism, Uracil containing	OG	0.0278762	0.106033	-0.141377	increase
	margarate (17:0)	Lipid	Long Chain Saturated Fatty Acid	OG	0.0279354	0.0600288	-0.0800384	increase
	lysylleucine	Peptide	Dipeptide	OG	0.0280738	0.150849	-0.201133	increase
	carotene diol (1)	Cofactors and Vitamins	Vitamin A Metabolism	CG	0.0282327	-0.421853	0.562471	decrease
	3-amino-2-piperidone	Amino Acid	Urea cycle; Arginine and Proline Metabolism	OG	0.0283256	0.0343599	-0.0458131	increase
	3,4-dihydroxybenzoate	Xenobiotics	Benzoate Metabolism	CG	0.0284346	-0.128732	0.171643	decrease
	nonadecanoate (19:0)	Lipid	Long Chain Saturated Fatty Acid	CG	0.0285164	-0.0124619	0.0166159	decrease
	phytosphingosine	Lipid	Sphingolipid Synthesis	CG	0.0286099	-0.010169	0.0135586	decrease
	threonate	Cofactors and Vitamins	Ascorbate and Aldarate Metabolism	CG	0.0286346	-0.105739	0.140985	decrease
	5-methyluridine (ribothymidine)	Nucleotide	Pyrimidine Metabolism, Uracil containing	CG	0.0287504	-0.43716	0.582881	decrease
	docosahexaenoate (DHA; 22:6n3)	Lipid	Long Chain Polyunsaturated Fatty Acid (n3 and n6)	OG	0.0290978	0.0146496	-0.0195328	increase
	1-palmitoyl-2-oleoyl-GPE (16:0/18:1)	Lipid	Phosphatidylethanolamine (PE)	CG	0.0292298	-0.314699	0.419599	decrease
	leucylalanine	Peptide	Dipeptide	OG	0.0297573	0.412465	-0.549954	increase
	2,8-quinolinediol	Xenobiotics	Food Component/Plant	CG	0.0298554	-0.307881	0.410508	decrease
	N-isobutyryl-phenylalanine	Amino Acid	Phenylalanine Metabolism	OG	0.0298625	0.140559	-0.187412	increase
	gluconate	Xenobiotics	Food Component/Plant	OG	0.0299261	0.0749059	-0.0998746	increase
	palmitate (16:0)	Lipid	Long Chain Saturated Fatty Acid	OG	0.0300644	0.245744	-0.327658	increase
	N-acetylserotonin	Amino Acid	Tryptophan Metabolism	CG	0.030076	-0.254779	0.339705	decrease
	5-methylhexanoate (i7:0)	Lipid	Fatty Acid, Branched	CG	0.0302338	-0.397419	0.529892	decrease
	2-hydroxybehenate	Lipid	Fatty Acid, Monohydroxy	OG	0.0305356	0.210684	-0.280912	increase
	valeryltryptophan*	Amino Acid	Tryptophan Metabolism	OG	0.030537	0.0830558	-0.110741	increase
	arabitol/xylitol	Carbohydrate	Pentose Metabolism	CG	0.0307132	-0.00383586	0.00511447	decrease
	enterolactone sulfate	Xenobiotics	Food Component/Plant	CG	0.0309605	-0.429879	0.573171	decrease
	3-carboxyadipate	Lipid	Fatty Acid, Dicarboxylate	OG	0.0310817	0.0973011	-0.129735	increase
	21-hydroxypregnanolone monosulfate (1)	Lipid	Pregnenolone Steroids	CG	0.0311509	-0.0611733	0.0815644	decrease
	2-hydroxyarachidate*	Lipid	Fatty Acid, Monohydroxy	OG	0.0312048	0.252264	-0.336353	increase
	guanidinosuccinate	Amino Acid	Guanidino and Acetamido Metabolism	OG	0.031396	0.245079	-0.326772	increase
	LAHSA (18:2/OH-18:0)*	Lipid	Fatty Acid Hydroxyl Fatty Acid	OG	0.0317052	0.504424	-0.672565	increase
	quinate	Xenobiotics	Food Component/Plant	CG	0.0319406	-0.365241	0.486988	decrease
	2-oxindole-3-acetate	Xenobiotics	Food Component/Plant	CG	0.0319744	-0.241024	0.321366	decrease
	carotene diol (2)	Cofactors and Vitamins	Vitamin A Metabolism	CG	0.0321917	-0.495438	0.660584	decrease
	tetradecadienoate (14:2)*	Lipid	Long Chain Polyunsaturated Fatty Acid (n3 and n6)	OG	0.0323934	0.0853951	-0.11386	increase
	1-palmitoyl-galactosylglycerol (16:0)*	Lipid	Galactosyl Glycerolipids	CG	0.0324725	-0.123084	0.164111	decrease
	N,N,N-trimethyl-alanylproline betaine (TMAP)	Amino Acid	Urea cycle; Arginine and Proline Metabolism	CG	0.0327142	-0.229011	0.305348	decrease
	3-ketosphinganine	Lipid	Sphingolipid Synthesis	CG	0.032864	-0.509731	0.679642	decrease
	N-carboxymethylalanine	Xenobiotics	Food Component/Plant	CG	0.0329127	-0.17822	0.237626	decrease
	ceramide (d18:1/14:0, d16:1/16:0)*	Lipid	Ceramides	CG	0.0331709	-0.0312739	0.0416986	decrease
	12,13-DiHOME	Lipid	Fatty Acid, Dihydroxy	OG	0.033365	0.155582	-0.207443	increase
	valine betaine	Amino Acid	Leucine, Isoleucine and Valine Metabolism	CG	0.0335361	-0.34661	0.462147	decrease
	inosine	Nucleotide	Purine Metabolism, (Hypo)Xanthine/Inosine containing	CG	0.0339556	-0.369757	0.493009	decrease
	linolenoyl-linolenoyl-glycerol (18:3/18:3) [2]*	Lipid	Diacylglycerol	CG	0.0343604	-0.058955	0.0786066	decrease
	riboflavin (vitamin B2)	Cofactors and Vitamins	Riboflavin Metabolism	CG	0.0346058	-0.238596	0.318127	decrease
	N-methylleucine	Amino Acid	Leucine, Isoleucine and Valine Metabolism	CG	0.0346431	-0.118436	0.157914	decrease
	3-hydroxy-2-ethylpropionate	Amino Acid	Leucine, Isoleucine and Valine Metabolism	CG	0.0346973	-0.201158	0.268211	decrease
	isourolithin A	Xenobiotics	Bacterial/Fungal	CG	0.0347188	-0.151939	0.202585	decrease
	linoleate (18:2n6)	Lipid	Long Chain Polyunsaturated Fatty Acid (n3 and n6)	OG	0.0348758	0.362126	-0.482835	increase
	N2-acetyl,N6-methyllysine	Amino Acid	Lysine Metabolism	OG	0.0348821	0.102684	-0.136912	increase
	1-linolenoyl-sulfoquinovopyranosyl-glycerol (18:3)*	Lipid	Monoacylglycerol	OG	0.0348947	0.0446792	-0.0595723	increase
	arachidoyl ethanolamide (20:0)*	Lipid	Endocannabinoid	CG	0.0349309	-0.232164	0.309552	decrease
	formiminoglutamate	Amino Acid	Histidine Metabolism	OG	0.0349993	0.0401773	-0.0535698	increase
	OAHSA (18:1/OH-18:0)	Lipid	Fatty Acid Hydroxyl Fatty Acid	OG	0.03509	0.375929	-0.501238	increase
	oleate/vaccenate (18:1)	Lipid	Long Chain Monounsaturated Fatty Acid	OG	0.0351112	0.342214	-0.456285	increase
	3,5-dihydroxybenzoic acid	Xenobiotics	Benzoate Metabolism	CG	0.0352679	-0.377934	0.503912	decrease
	palmitoyl-linolenoyl-glycerol (16:0/18:3) [2]*	Lipid	Diacylglycerol	CG	0.0353347	-0.0357342	0.0476456	decrease
	oleoyl-linoleoyl-glycerol (18:1/18:2) [2]	Lipid	Diacylglycerol	OG	0.0354283	0.277544	-0.370058	increase
	erythronate*	Carbohydrate	Aminosugar Metabolism	OG	0.0354789	0.0513821	-0.0685095	increase
	xylose	Carbohydrate	Pentose Metabolism	CG	0.0355978	-0.134442	0.179256	decrease
	nicotinic acid mononucleotide (NaMN)	Cofactors and Vitamins	Nicotinate and Nicotinamide Metabolism	CG	0.0360121	-0.0649823	0.086643	decrease
	histidine betaine (hercynine)*	Xenobiotics	Food Component/Plant	CG	0.0365848	-0.0448504	0.0598006	decrease
	methionine sulfoxide	Amino Acid	Methionine, Cysteine, SAM and Taurine Metabolism	OG	0.0367173	0.224182	-0.29891	increase
	2'-O-methylcytidine	Nucleotide	Pyrimidine Metabolism, Cytidine containing	OG	0.0369275	0.0426196	-0.0568261	increase
	deoxymugineic acid	Xenobiotics	Food Component/Plant	OG	0.0369976	0.161015	-0.214687	increase
	feruloylquinate (4)	Xenobiotics	Food Component/Plant	CG	0.0372182	-0.362294	0.483059	decrease
	tyrosol	Amino Acid	Tyrosine Metabolism	OG	0.0375961	0.0649468	-0.0865958	increase
	cytidine	Nucleotide	Pyrimidine Metabolism, Cytidine containing	CG	0.0376651	-0.019665	0.02622	decrease
	aconitate [cis or trans]	Energy	TCA Cycle	CG	0.0377993	-0.0357059	0.0476079	decrease
	taurochenodeoxycholate	Lipid	Primary Bile Acid Metabolism	CG	0.0380231	-0.321425	0.428567	decrease
	lysylalanine	Peptide	Dipeptide	OG	0.0387526	0.30696	-0.409279	increase
	N-stearoyltaurine	Lipid	Endocannabinoid	CG	0.0388249	-0.0981787	0.130905	decrease
	2-methylbutyrylphenylalanine	Xenobiotics	Benzoate Metabolism	OG	0.0388851	0.35003	-0.466706	increase
	benzoate	Xenobiotics	Benzoate Metabolism	CG	0.0390947	-0.332116	0.442822	decrease
	piperidine	Xenobiotics	Food Component/Plant	CG	0.0393163	-0.0634993	0.0846657	decrease
	1-palmitoyl-GPE (16:0)	Lipid	Lysophospholipid	CG	0.0394608	-0.510164	0.680219	decrease
	tricarballylate	Energy	TCA Cycle	OG	0.03949	0.406817	-0.542422	increase
	mannose	Carbohydrate	Fructose, Mannose and Galactose Metabolism	CG	0.0395472	-0.00353962	0.00471949	decrease
	N-alpha-acetylornithine	Amino Acid	Urea cycle; Arginine and Proline Metabolism	OG	0.0399308	0.00912303	-0.012164	increase
	tryptophan betaine	Amino Acid	Tryptophan Metabolism	CG	0.0399847	-0.372748	0.496997	decrease
	4-hydroxycyclohexylcarboxylic acid	Xenobiotics	Food Component/Plant	CG	0.0400128	-0.41599	0.554654	decrease
	2-palmitoyl-galactosylglycerol (16:0)*	Lipid	Galactosyl Glycerolipids	CG	0.0400559	-0.0556787	0.0742383	decrease
	palmitoyl-linoleoyl-glycerol (16:0/18:2) [2]*	Lipid	Diacylglycerol	OG	0.0407116	0.151214	-0.201619	increase
	1-methyl-4-imidazoleacetate	Amino Acid	Histidine Metabolism	CG	0.0407674	-0.256398	0.341864	decrease
	N-acetylsphingosine	Lipid	Sphingosines	OG	0.0407705	0.281262	-0.375016	increase
	flavin mononucleotide (FMN)	Cofactors and Vitamins	Riboflavin Metabolism	OG	0.0408126	0.186358	-0.248477	increase
	N-linoleoyltaurine*	Lipid	Endocannabinoid	OG	0.0412657	0.272956	-0.363942	increase
	adenine	Nucleotide	Purine Metabolism, Adenine containing	OG	0.0413162	0.109009	-0.145345	increase
	ethylmalonate	Amino Acid	Leucine, Isoleucine and Valine Metabolism	OG	0.04149	0.306936	-0.409248	increase
	carboxymethylarginine	Amino Acid	Urea cycle; Arginine and Proline Metabolism	CG	0.0415077	-0.05232	0.0697599	decrease
	lactobacillic acid	Xenobiotics	Bacterial/Fungal	CG	0.041681	-0.05353	0.0713734	decrease
	2'-deoxyadenosine	Nucleotide	Purine Metabolism, Adenine containing	CG	0.0420025	-0.303894	0.405192	decrease
	oleoyl-linoleoyl-glycerol (18:1/18:2) [1]	Lipid	Diacylglycerol	OG	0.0421753	0.318952	-0.42527	increase
	2-hydroxystearate	Lipid	Fatty Acid, Monohydroxy	CG	0.0423045	-0.206444	0.275259	decrease
	adenosine	Nucleotide	Purine Metabolism, Adenine containing	CG	0.0427015	-0.125482	0.167309	decrease
	pheophorbide A	Xenobiotics	Food Component/Plant	CG	0.0427385	-0.355415	0.473887	decrease
	4-hydroxycinnamate	Xenobiotics	Food Component/Plant	CG	0.0427386	-0.0798181	0.106424	decrease
	mannitol/sorbitol	Carbohydrate	Fructose, Mannose and Galactose Metabolism	CG	0.0432308	-0.0910703	0.121427	decrease
	sphinganine	Lipid	Sphingolipid Synthesis	OG	0.0436185	0.101133	-0.134843	increase
	arachidate (20:0)	Lipid	Long Chain Saturated Fatty Acid	OG	0.0440902	0.0937094	-0.124946	increase
	7-methylguanine	Nucleotide	Purine Metabolism, Guanine containing	CG	0.0444829	-0.0785362	0.104715	decrease
	homocysteine	Amino Acid	Methionine, Cysteine, SAM and Taurine Metabolism	CG	0.0451033	-0.261989	0.349318	decrease
	delta-tocopherol	Cofactors and Vitamins	Tocopherol Metabolism	CG	0.0452776	-0.058449	0.077932	decrease
	pyridoxal	Cofactors and Vitamins	Vitamin B6 Metabolism	CG	0.0458026	-0.135092	0.180122	decrease
	thymidine 5'-monophosphate	Nucleotide	Pyrimidine Metabolism, Thymine containing	OG	0.0462735	0.202265	-0.269687	increase
	eicosenoate (20:1)	Lipid	Long Chain Monounsaturated Fatty Acid	OG	0.0462899	0.30058	-0.400773	increase
	behenoyl ethanolamide (22:0)*	Lipid	Endocannabinoid	CG	0.0465564	-0.106186	0.141582	decrease
	lactobionate	Carbohydrate	Disaccharides and Oligosaccharides	CG	0.0468276	-0.329779	0.439706	decrease
	N-butyryl-lysine	Amino Acid	Lysine Metabolism	CG	0.047095	-0.0822778	0.109704	decrease
	6-oxolithocholate	Lipid	Secondary Bile Acid Metabolism	CG	0.0472135	-0.0974829	0.129977	decrease
	3-hydroxypropanoate	Lipid	Fatty Acid, Monohydroxy	OG	0.0481044	0.0425629	-0.0567505	increase
	phosphate	Energy	Oxidative Phosphorylation	OG	0.0482238	0.531824	-0.709098	increase
	delta-CEHC	Cofactors and Vitamins	Tocopherol Metabolism	CG	0.0484211	-0.167664	0.223552	decrease
	caffeate	Xenobiotics	Food Component/Plant	OG	0.0489116	0.0606547	-0.0808729	increase
	gentisic acid-5-glucoside	Xenobiotics	Chemical	OG	0.0490625	0.093016	-0.124021	increase
	oleanolate	Xenobiotics	Food Component/Plant	OG	0.0493496	0.0176282	-0.0235043	increase
	ribitol	Carbohydrate	Pentose Metabolism	CG	0.0494416	-0.143198	0.190931	decrease
	diacylglycerol (16:1/18:2 [2], 16:0/18:3 [1])*	Lipid	Diacylglycerol	OG	0.0498318	0.0535673	-0.0714231	increase
	val-val-ala	Peptide	Polypeptide	OG	0.0501129	0.00975137	-0.0130018	increase
	bilirubin degradation product, C16H18N2O5 (4)**	Partially Characterized Molecules	Partially Characterized Molecules	OG	0.0505887	0.16082	-0.214427	increase
	ribulose/xylulose	Carbohydrate	Pentose Metabolism	OG	0.0510404	0.0760307	-0.101374	increase
	linoleoyl-linolenoyl-glycerol (18:2/18:3) [1]*	Lipid	Diacylglycerol	CG	0.0511267	-0.109573	0.146097	decrease
	hypericine	Xenobiotics	Food Component/Plant	CG	0.0512796	-0.199387	0.26585	decrease
	dihomo-linoleate (20:2n6)	Lipid	Long Chain Polyunsaturated Fatty Acid (n3 and n6)	CG	0.0513478	-0.103483	0.137977	decrease
	N-acetylhomocitrulline	Amino Acid	Urea cycle; Arginine and Proline Metabolism	OG	0.0515254	0.124792	-0.16639	increase
	erucate (22:1n9)	Lipid	Long Chain Monounsaturated Fatty Acid	OG	0.0517063	0.135461	-0.180614	increase
	2-hydroxydecanoate	Lipid	Fatty Acid, Monohydroxy	CG	0.0517276	-0.181065	0.24142	decrease
	glutamate, gamma-methyl ester	Amino Acid	Glutamate Metabolism	CG	0.0517338	-0.230188	0.306918	decrease
	glycerophosphoinositol*	Lipid	Phospholipid Metabolism	OG	0.0523153	0.195359	-0.260479	increase
	methylphosphate	Nucleotide	Purine and Pyrimidine Metabolism	OG	0.0528031	0.314388	-0.419183	increase
	hexadecasphinganine (d16:0)*	Lipid	Sphingolipid Synthesis	OG	0.0532228	0.0442306	-0.0589741	increase
	13-HODE + 9-HODE	Lipid	Fatty Acid, Monohydroxy	OG	0.0534549	0.379584	-0.506112	increase
	linolenoyl-linolenoyl-glycerol (18:3/18:3) [1]*	Lipid	Diacylglycerol	OG	0.0536736	0.0862839	-0.115045	increase
	N1-methyladenosine	Nucleotide	Purine Metabolism, Adenine containing	CG	0.0541865	-0.0976678	0.130224	decrease
	linolenate [alpha or gamma; (18:3n3 or 6)]	Lipid	Long Chain Polyunsaturated Fatty Acid (n3 and n6)	OG	0.0544112	0.145671	-0.194229	increase
	PAHSA (16:0/OH-18:0)	Lipid	Fatty Acid Hydroxyl Fatty Acid	OG	0.0545879	0.301836	-0.402448	increase
	mannonate*	Xenobiotics	Food Component/Plant	OG	0.0554832	0.17995	-0.239934	increase
	caprylate (8:0)	Lipid	Medium Chain Fatty Acid	CG	0.0556984	-0.358271	0.477695	decrease
	serotonin	Amino Acid	Tryptophan Metabolism	OG	0.0558185	0.0384396	-0.0512528	increase
	1-linolenoylglycerol (18:3)	Lipid	Monoacylglycerol	CG	0.0561505	-0.0381929	0.0509238	decrease
	imidazole propionate	Amino Acid	Histidine Metabolism	OG	0.0569947	0.0514598	-0.0686131	increase
	2-oleoylglycerol (18:1)	Lipid	Monoacylglycerol	OG	0.0578297	0.107615	-0.143487	increase
	phenylacetylphenylalanine	Peptide	Acetylated Peptides	OG	0.058415	0.204125	-0.272167	increase
	glucose 6-phosphate	Carbohydrate	Glycolysis, Gluconeogenesis, and Pyruvate Metabolism	OG	0.059767	0.296902	-0.395869	increase
	1-linoleoylglycerol (18:2)	Lipid	Monoacylglycerol	CG	0.0598754	-0.0453846	0.0605128	decrease
	ferulate	Xenobiotics	Food Component/Plant	CG	0.060255	-0.154687	0.20625	decrease
	2'-deoxycytidine	Nucleotide	Pyrimidine Metabolism, Cytidine containing	CG	0.0604289	-0.0445783	0.0594377	decrease
	2-hydroxyheptanoate*	Lipid	Fatty Acid, Monohydroxy	CG	0.0614198	-0.0166689	0.0222252	decrease
	indoleacrylate	Amino Acid	Tryptophan Metabolism	CG	0.0623058	-0.276001	0.368001	decrease
	N-linoleoylglycine	Lipid	Fatty Acid Metabolism (Acyl Glycine)	OG	0.0629085	0.352036	-0.469381	increase
	gulonate*	Cofactors and Vitamins	Ascorbate and Aldarate Metabolism	CG	0.0643633	-0.0559429	0.0745905	decrease
	caffeic acid sulfate	Xenobiotics	Food Component/Plant	CG	0.0645066	-0.0633344	0.0844458	decrease
	3-hydroxydecanoylcarnitine	Lipid	Fatty Acid Metabolism (Acyl Carnitine, Hydroxy)	CG	0.0647479	-0.210708	0.280944	decrease
	beta-hydroxyisovaleroylcarnitine	Amino Acid	Leucine, Isoleucine and Valine Metabolism	OG	0.0653244	0.116054	-0.154738	increase
	linoleoyl-linoleoyl-glycerol (18:2/18:2) [2]*	Lipid	Diacylglycerol	CG	0.0653752	-0.0408584	0.0544779	decrease
	myo-inositol	Lipid	Inositol Metabolism	OG	0.0663677	0.194548	-0.259398	increase
	glycyrrhetinate	Xenobiotics	Food Component/Plant	CG	0.0672029	-0.201776	0.269035	decrease
	linoleoyl-linolenoyl-glycerol (18:2/18:3) [2]*	Lipid	Diacylglycerol	CG	0.0702463	-0.158613	0.211484	decrease
	formononetin	Xenobiotics	Food Component/Plant	CG	0.0708659	-0.171808	0.229078	decrease
	glutarate (C5-DC)	Lipid	Fatty Acid, Dicarboxylate	CG	0.0708926	-0.265962	0.354616	decrease
	methionine sulfone	Amino Acid	Methionine, Cysteine, SAM and Taurine Metabolism	CG	0.0720013	-0.245719	0.327625	decrease
	1-oleoylglycerol (18:1)	Lipid	Monoacylglycerol	OG	0.072054	0.0852498	-0.113666	increase
	oxalate (ethanedioate)	Cofactors and Vitamins	Ascorbate and Aldarate Metabolism	OG	0.0721337	0.0502154	-0.0669539	increase
	7-hydroxycholesterol (alpha or beta)	Lipid	Sterol	OG	0.0723144	0.0912645	-0.121686	increase
	glycerol 3-phosphate	Lipid	Glycerolipid Metabolism	OG	0.0837946	0.154585	-0.206113	increase
	linoleoyl-linoleoyl-glycerol (18:2/18:2) [1]*	Lipid	Diacylglycerol	CG	0.0865097	-0.0966987	0.128932	decrease

## Sheet: Supplementary Table S3-6
Component	Data set	Selected feature	Group contribution assigned by the model	Importance	OG	CG
1	Targeted plasma profile
		FA	OG	-1	0.286156	-0.642989
	Metabolic data
		LDL	CG	0.823641	-0.656983	0.673794
		TC	CG	0.537516	-0.410137	0.544758
		DBP	CG	0.180809	-0.310777	0.274489
	Microbiome genera
		Erysipelotrichaceae_UCG-003	OG	-0.792521	0.520069	-0.884108
		Marvinbryantia	CG	0.501407	-0.22675	0.500172
		Eggerthella	OG	-0.338492	-0.0310054	-0.354307
		Intestinimonas	OG	-0.0769709	0.165927	-0.290408
	Global plasma metabolomic profile
		4-vinylphenol sulfate	OG	-0.435331	0.480987	-0.848769
		2-acetamidophenol sulfate	OG	-0.387515	0.556895	-0.862477
		homostachydrine*	CG	0.361142	-0.769095	1.13961
		4-hydroxyhippurate	OG	-0.340871	0.620953	-0.783574
		vanilloylglycine	OG	-0.324693	0.419527	-0.702029
		2-aminophenol sulfate	OG	-0.311504	0.411337	-0.880846
		3-methylhistidine	CG	0.275451	-0.637161	1.04608
		I-urobilinogen	OG	-0.243217	0.616199	-1.067
		2-methoxyhydroquinone sulfate (1)	OG	-0.185032	0.566514	-0.364569
		3-methoxycatechol sulfate (2)	OG	-0.143103	0.43787	-0.653638
		2S,3R-dihydroxybutyrate	CG	0.11235	-0.626495	1.03164
		2-aminoheptanoate	OG	-0.0921778	0.616662	-0.789601
		1-methyl-5-imidazolelactate	CG	0.0152219	-0.398409	0.795158
		N-acetyl-3-methylhistidine*	CG	0.0119789	-0.562127	0.778913
		N-acetyl-1-methylhistidine*	CG	0.00211207	-0.405845	0.759667
	Global fecal metabolomic profile
		8-methoxykynurenate	OG	-0.556651	0.954956	-1.03728
		isocaproate (i6:0)	CG	0.429936	-0.475623	0.728114
		9,10-DiHOME	OG	-0.33487	0.572872	-0.753022
		oleoyl ethanolamide	OG	-0.320801	0.763011	-0.543231
		linoleoyl ethanolamide	OG	-0.244872	0.280656	-0.562644
		branched chain 14:0 dicarboxylic acid**	CG	0.220897	-0.520119	1.14812
		palmitoyl ethanolamide	OG	-0.184657	0.330319	-0.37277
		2-oxo-1-pyrrolidinepropionate	CG	0.184458	-0.54429	1.04705
		1-methyl-5-imidazolelactate	CG	0.172566	-0.304701	0.619686
		agmatine	CG	0.169143	-0.446206	0.534339
		N-carbamoylputrescine	CG	0.15736	-0.549405	0.6158
		N-acetyltryptophan	CG	0.132513	-0.750573	1.18388
		3-hydroxyphenylacetate	CG	0.0946953	-0.427654	0.777195
		LAHSA (18:2/OH-18:0)*	OG	-0.0455928	0.349131	-0.342167
		homostachydrine*	CG	0.0400872	-0.26642	0.679423
2	Targeted plasma profile
		DHFA	OG	1	-0.109712	-0.604387
	Metabobic data
		Bilirubin	CG	0.441632	-0.301894	-0.273802
		Uric acid	CG	0.436905	-0.198388	-0.194403
		NEFAs	OG	0.36872	-0.0580372	-0.155306
		Body weight	CG	-0.29228	-0.317204	0.151794
		BMI	CG	-0.29228	-0.317204	0.151794
		SBP	CG	-0.290022	-0.0843879	0.277341
		DBP	CG	-0.253423	-0.310777	0.274489
		Creatinine	CG	0.236308	-0.0899065	0.155121
		Lipase	CG	-0.213067	-0.0903422	0.108659
		GFR	OG	-0.189171	0.111874	-0.149529
		Pulse	CG	0.142292	-0.130518	0.19831
		ALT	OG	0.0373918	0.18109	-0.247486
		Glucose	CG	0.0152485	-0.0214504	0.595971
		FM	OG	-0.00470865	0.271602	-0.158239
		HbA1c	OG	0.0022929	-0.137264	-0.154064
	Microbiome genera
		[Erysipelotrichaceae] uncultured	OG	1	0.113036	-0.18713
	Global plasma metabolomic profile
		palmitoleoylcarnitine (C16:1)*	OG	0.436397	-0.0323194	-0.0709624
		bilirubin (Z,Z)	OG	0.419792	-0.0999201	-0.387569
		biliverdin	OG	0.399941	0.0966716	-0.0389104
		palmitoylcarnitine (C16)	OG	0.357324	-0.00504329	-0.095207
		3-hydroxyoleoylcarnitine	CG	0.335129	-0.153652	0.0685955
		eicosenoylcarnitine (C20:1)*	OG	0.310257	0.0977301	-0.141423
		oleoylcarnitine (C18:1)	OG	0.212754	0.0507108	-0.0867751
		myristoleoylcarnitine (C14:1)*	CG	0.204145	-0.298166	-0.0565658
		vanillylmandelate (VMA)	OG	0.188932	0.132398	0.0424061
		tetradecadienedioate (C14:2-DC)*	OG	0.074704	0.00688454	-0.132333
		1-adrenoyl-GPC (22:4)*	OG	0.0680389	0.18125	-0.582691
		dihomo-linoleate (20:2n6)	CG	0.0509146	-0.0293465	0.154769
		laurylcarnitine (C12)	CG	0.0315072	-0.295538	0.135421
		margarate (17:0)	CG	0.0263967	-0.104611	0.0419437
		eicosenoate (20:1)	CG	0.00141328	-0.0418868	0.352067
	Global fecal metabolomic profile
		carboxymethylarginine	tie	-0.530939	0.120075	0.120075
		galactosylglycerol	OG	-0.488905	-0.0379081	-0.163617
		2-hydroxydecanoate	CG	-0.450971	-0.325003	0.270741
		fructosyllysine	CG	-0.277659	-0.596159	0.170404
		asparagine	CG	-0.235199	-0.323142	0.202514
		cyclo(pro-sulfo-tyr)*	tie	-0.209081	0.263101	0.263101
		palmitoylcarnitine (C16)	OG	-0.191267	0.323556	0.222724
		dihomo-linoleate (20:2n6)	CG	-0.156745	0.106431	0.192126
		prolylproline	CG	-0.115275	-0.195442	0.0520432
		docosapentaenoate (n3 DPA; 22:5n3)	CG	-0.105925	0.00125391	0.171748
		gulonate*	CG	-0.0944608	-0.00797308	0.266959
		hexanoyltaurine	tie	-0.0675809	0.317464	0.317464
		stearoylcarnitine (C18)	CG	-0.0167455	-0.0722453	0.610068
		delta-CEHC	tie	-0.0118462	0.0511973	0.0511973
		4-allylcatechol sulfate	tie	-0.000996781	-0.153335	-0.153335

## Sheet: Supplementary Table S3-7
Component	Data set	Selected feature	Group contribution assigned by the model	Importance	OG	CG
1	Targeted plasma profile
		FA	OG	-1	0.286156	-0.642989
	Metabolic data
		LDL	CG	1	-0.656983	0.673794
	KEGG pathway
		Naphthalene degradation	CG	0.71833	-0.29497	0.30481
		CH-DA	CG	0.469195	-0.390375	0.354685
		Novobiocin biosynthesis	OG	-0.358399	0.343599	-0.167275
		Aminobenzoate degradation	OG	-0.320502	0.275863	-0.44832
		Nitrogen metabolism	OG	-0.180796	0.111562	-0.117389
	Global plasma metabolomic profile
		4-vinylphenol sulfate	OG	-0.45609	0.480987	-0.848769
		homostachydrine*	CG	0.418265	-0.769095	1.13961
		2-acetamidophenol sulfate	OG	-0.394379	0.556895	-0.862477
		2-aminophenol sulfate	OG	-0.35398	0.411337	-0.880846
		3-methylhistidine	CG	0.273617	-0.637161	1.04608
		vanilloylglycine	OG	-0.266805	0.419527	-0.702029
		I-urobilinogen	OG	-0.249394	0.616199	-1.067
		4-hydroxyhippurate	OG	-0.238973	0.620953	-0.783574
		2-methoxyhydroquinone sulfate (1)	OG	-0.150532	0.566514	-0.364569
		2S,3R-dihydroxybutyrate	CG	0.148527	-0.626495	1.03164
		3-methoxycatechol sulfate (2)	OG	-0.144294	0.43787	-0.653638
		propionylcarnitine (C3)	CG	0.0525885	-0.260435	0.260376
		carotene diol (1)	CG	0.0374439	-0.35337	0.643596
		2-hydroxyhippurate (salicylurate)	OG	-0.0324294	0.63665	-0.70271
		2-aminoheptanoate	OG	-0.00911434	0.616662	-0.789601
	Global fecal metabolomic profile
		8-methoxykynurenate	OG	-0.583737	0.954956	-1.03728
		9,10-DiHOME	OG	-0.436854	0.572872	-0.753022
		isocaproate (i6:0)	CG	0.385018	-0.475623	0.728114
		oleoyl ethanolamide	OG	-0.308293	0.763011	-0.543231
		branched chain 14:0 dicarboxylic acid**	CG	0.287233	-0.520119	1.14812
		N-palmitoylglycine	OG	-0.183189	0.429863	-0.833477
		linoleoyl ethanolamide	OG	-0.182163	0.280656	-0.562644
		2-oxo-1-pyrrolidinepropionate	CG	0.159318	-0.54429	1.04705
		homostachydrine*	CG	0.148327	-0.26642	0.679423
		palmitoyl ethanolamide	OG	-0.135955	0.330319	-0.37277
		N-carbamoylputrescine	CG	0.0609249	-0.549405	0.6158
		indolepropionate	CG	0.0537033	-0.565695	0.930373
		agmatine	CG	0.0536195	-0.446206	0.534339
		3-hydroxyphenylacetate	CG	0.0230338	-0.427654	0.777195
		carotene diol (2)	CG	0.00365456	-0.678098	0.466043
2	Targeted plasma profile
		DHFA	OG	1	-0.109712	-0.604387
	Metabobic data
		Bilirubin	CG	0.940928	-0.301894	-0.273802
		NEFAs	OG	0.286014	-0.0580372	-0.155306
		Uric acid	CG	0.181245	-0.198388	-0.194403
	KEGG pathway
		Aminobenzoate degradation	OG	0.950713	0.275863	-0.44832
		Riboflavin metabolism	CG	-0.310072	-0.118591	0.210631
	Global plasma metabolomic profile
		bilirubin (Z,Z)	OG	0.5442	-0.0999201	-0.387569
		palmitoleoylcarnitine (C16:1)*	OG	0.360807	-0.0323194	-0.0709624
		biliverdin	OG	0.342243	0.0966716	-0.0389104
		phenylalanine	OG	0.264904	0.18714	0.104051
		branched-chain, straight-chain, or cyclopropyl 12:1 fatty acid*	OG	0.255347	0.0410053	-0.280929
		bilirubin (E,Z or Z,E)*	CG	0.250013	-0.0777583	0.25676
		oleoylcarnitine (C18:1)	OG	0.247862	0.0507108	-0.0867751
		eicosenoylcarnitine (C20:1)*	OG	0.243498	0.0977301	-0.141423
		myristoleoylcarnitine (C14:1)*	CG	0.196008	-0.298166	-0.0565658
		dodecadienoate (12:2)*	OG	0.175078	0.311694	-0.168146
		dihomo-linoleate (20:2n6)	CG	0.164913	-0.0293465	0.154769
		vanillylmandelate (VMA)	OG	0.129327	0.132398	0.0424061
		tetradecadienedioate (C14:2-DC)*	OG	0.111301	0.00688454	-0.132333
		palmitoylcarnitine (C16)	OG	0.104102	-0.00504329	-0.095207
		hydantoin-5-propionate	CG	0.0413177	-0.482187	0.366949
	Global fecal metabolomic profile
		fructosyllysine	CG	-0.521393	-0.596159	0.170404
		docosapentaenoate (n3 DPA; 22:5n3)	CG	-0.501981	0.00125391	0.171748
		galactosylglycerol	OG	-0.368471	-0.0379081	-0.163617
		palmitoylcarnitine (C16)	OG	-0.31258	0.323556	0.222724
		dihomo-linolenate (20:3n3 or n6)	OG	-0.291588	-0.00133429	-0.140965
		asparagine	CG	-0.222602	-0.323142	0.202514
		carboxymethylarginine	tie	-0.195314	0.120075	0.120075
		dihomo-linoleate (20:2n6)	CG	-0.189677	0.106431	0.192126
		hexanoyltaurine	tie	-0.149999	0.317464	0.317464
		N-stearoyltaurine	tie	-0.0591198	0.325371	0.325371
		oleoylcarnitine (C18:1)	OG	-0.058033	0.498808	0.0510124
		taurolithocholate	tie	-0.0546996	0.172167	0.172167
		delta-CEHC	tie	-0.028841	0.0511973	0.0511973
		2S,3R-dihydroxybutyrate	CG	-0.0256397	-0.126985	0.209198
		cyclo(pro-sulfo-tyr)*	tie	-0.0119229	0.263101	0.263101
