# Supplementary material for: Cholesterol-lowering effects of oats induced by microbially produced phenolic metabolites
Source: Research Square preprint supplement (doi:10.21203/rs.3.rs-4188074/v1), 2024-07-16
Supplement: Supplementary file 3 [file 69dc4bd2408463c68d4c8ef8.xlsx]

## Sheet: Supplementary Table S2-1
Supplementary Table S2-1: Plasma ferulic and dihydroferulic acid levels pre- and post-intervention
		Within-group comparison1				Between-group comparison2
		Pre	Post	∆	P	β	95 % CI	P
DHFA	CG	1.50 ± 0.33	1.76 ± 0.33	0.25 ± 0.24	0.302	1.404	0.61, 2.20	0.001**
	OG	1.80 ± 0.37	3.09 ± 0.26	1.29 ± 0.39	0.005**
FA	CG	10.83 ± 0.21	10.90 ± 0.24	0.07 ± 0.11	0.533	0.71	0.26, 1.16	0.003**
	OG	10.77 ± 0.15	11.50 ± 0.13	0.73 ± 0.16	<0.001***
1Natural log-transformed data are presented as mean ± SEM (n = 32). ∆: log fold change. P-value refers to paired student's t-test. 2Data are presented as β estimate and 95 % confidence interval (CI). P-value refers to linear regression model with control group (CG) as the reference adjusted for pre-intervention concentration of the end point, BMI, age and sex. Model was performed with natural log…

## Sheet: Supplementary Table S2-2
Supplementary Table S2-2: Fasting clinical markers pre- and post-intervention
		Within-group comparison1					Between-group comparison2
		Pre	Post	∆	P	Padj.3		β	95 % CI	P	Padj.3
Anthropometrics
BW, kg	CG	97.30 ± 3.31	95.62 ± 3.12	-1.68 ± 0.34	< 0.001***	0.008**	M1	-0.542	-1.107 to 0.012	0.091	0.456
	OG	91.17 ± 2.71	89.23 ± 2.64	-1.94 ± 0.16	< 0.001***	0.008**	M2	-0.536	-1.201 to 0.109	0.133	0.57
BMI, kg/m²	CG	32.78 ± 0.93	32.22 ± 0.89	-0.56 ± 0.11	< 0.001***	0.008**	M1	-0.178	-0.363 to 0.022	0.097	0.456
	OG	31.30 ± 0.71	30.63 ± 0.69	-0.67 ± 0.05	< 0.001***	0.008**	M2	-0.19	-0.392 to 0.024	0.095	0.57
WC, cm	CG	110.96 ± 2.27	110.47 ± 2.07	-0.49 ± 0.43	0.273	>0.999	M1	-1.03	-1.967 to -0.063	0.061	0.427
	OG	102.84 ± 2.02	101.94 ± 1.96	-0.90 ± 0.40	0.042*	0.156	M2	-1.12	-2.600 to -0.098	0.128	0.57
WHtR	CG	0.63 (0.09)	0.64 (0.09)	-0.00 (0.01)	0.269	>0.999	M1	-0.005	-0.012 to 0.001	0.1	0.456
	OG	0.59 (0.06)	0.57 (0.07)	-0.01 (0.01)	0.039*	0.156	M2	-0.007	-0.015 to -0.001	0.104	0.57
Body fat, %	CG	39.29 ± 1.45	39.37 ± 1.44	0.1 ± 0.2	0.618	>0.999	M1	-0.02	-0.611 to 0.553	0.945	>0.999
	OG	39.44 ± 1.75	39.51 ± 1.86	0.1 ± 0.2	0.753	0.753	M2	0.132	-0.450 to 0.691	0.663	>0.999
REE, kcal/d	CG	1896 ± 74	1870 ± 72	-26 ± 35	0.478	>0.999	M1	-26.25	-105.716 to 48.172	0.512	>0.999
	OG	1738 ± 59	1713 ± 50	-25 ± 22	0.277	0.554	M2	-21.604	-108.163 to 81.324	0.573	>0.999
SBP, mmHg	CG	148.52 ± 4.72	142.47 ± 5.14	-6.06 ± 2.17	0.014*	0.084	M1	-5.849	-12.093 to 0.810	0.076	0.456
	OG	138.71 ± 2.35	127.44 ± 2.47	-11.26 ± 1.77	< 0.001***	0.008**	M2	-7.18	-14.957 to 2.029	0.056	0.392
DBP, mmHg	CG	93.90 ± 4.19	90.87 ± 3.80	-3.03 ± 1.17	0.021*	0.105	M1	-4.838	-8.465 to -1.012	0.009**	0.072
	OG	93.82 ± 1.74	85.96 ± 2.09	-7.86 ± 1.35	< 0.001***	0.008**	M2	-4.404	-8.627 to 0.310	0.027*	0.216
Lipid metabolism
TC, mg/dL	CG	205.27 ± 7.89	204.00 ± 6.87	-1.27 ± 2.78	0.655	>0.999	M1	-13.492	-21.783 to -5.410	0.004**	0.04*
	OG	238.76 ± 14.74	218.12 ± 12.55	-20.65 ± 3.99	< 0.001***	0.011*	M2	-15.581	-23.647 to -7.405	0.004**	0.04*
LDL, mg/dL	CG	135.87 ± 7.38	138.93 ± 6.27	3.07 ± 2.53	0.245	>0.999	M1	-15.65	-23.900 to -7.935	<0.001***	0.011*
	OG	168.94 ± 12.15	151.53 ± 10.95	-17.41 ± 3.32	< 0.001***	0.011*	M2	-16.197	-23.044 to -10.278	<0.001***	0.011*
HDL, mg/dL	CG	48.87 ± 2.04	46.60 ± 1.93	-2.27 ± 0.66	0.004**	0.04*	M1	-2.083	-4.580 to 0.038	0.125	>0.999
	OG	51.47 ± 2.75	46.88 ± 2.75	-4.59 ± 1.15	0.001**	0.011*	M2	-2.984	-5.201 to -1.261	0.028*	0.252
TG, mg/dL	CG	153 (97)	123 (85)	-11 (58)	0.137	0.959	M1	4.289	-26.814 to 39.086	0.784	>0.999
	OG	152 (49)	141 (100)	-1 (47)	0.336	0.912	M2	-0.777	-32.565 to 44.919	0.967	>0.999
Lipase, U/L	CG	35 (17)	31 (11)	-2 (9)	0.429	>0.999	M1	-1.943	-6.985 to 3.099	0.437	>0.999
	OG	34 (12)	31 (10)	-3 (7)	0.029*	0.145	M2	-1.356	-6.868 to 4.156	0.617	>0.999
NEFAs, mmol/L	CG	0.674 (0.540)	0.864 (0.270)	0.224 (0.510)	0.156	0.959	M1	-0.114	-0.303 to 0.113	0.222	>0.999
	OG	0.704 (0.290)	0.742 (0.260)	0.053 (0.350)	0.298	0.912	M2	-0.138	-0.381 to 0.112	0.214	>0.999
Bilirubin, mg/dL	CG	0.58 (0.18)	0.77 (0.43)	0.18 (0.34)	< 0.001***	0.011**	M1	0.043	-0.096 to 0.163	0.512	>0.999
	OG	0.51 (0.41)	0.79 (0.70)	0.23 (0.31)	< 0.001***	0.011**	M2	0.032	-0.105 to 0.145	0.646	>0.999
γ-GT, U/L	CG	38.0 (68.0)	36.0 (54.0)	-2.0 (8.0)	0.331	>0.999	M1	-0.779	-3.346 to 2.387	0.839	>0.999
	OG	29.0 (26.0)	27.0 (28.0)	-2.0 (2.0)	0.017*	0.102	M2	-0.548	-3.651 to 3.697	0.391	>0.999
ALT, U/L	CG	35.0 (18.0)	32.0 (20.0)	0.0 (6.0)	0.848	>0.999	M1	0.457	-3.819 to 4.534	0.663	>0.999
	OG	27.0 (12.0)	25.0 (16.0)	1.0 (8.0)	0.247	0.912	M2	-0.051	-6.140 go 5.436	0.52	>0.999
AST, U/L	CG	30.0 (13.0)	30.0 (15.0)	2.0 (11.0)	0.064	0.512	M1	-3.119	-7.736 to 1.498	0.178	>0.999
	OG	19.0 (9.5)	22.0 (9.0)	2.0 (8.0)	0.228	0.912	M2	-3.657	-8.228 to 0.915	0.112	0.896
FLI	CG	89.39 (17.88)	85.33 (14.26)	-1.61 (5.02)	0.047*	0.423	M1	-1.974	-5.526 to 1.578	0.265	>0.999
	OG	78.35 (32.65)	75.84 (42.49)	-2.47 (6.61)	0.006**	0.042*	M2	-1.79	-5.037 to 1.457	0.268	>0.999
Glucose metabolism
Glucose, mg/dL	CG	99.47 ± 2.69	97.67 ± 2.94	-1.80 ± 2.25	0.438	0.876	M1	-2.962	-7.781 to 1.487	0.232	>0.999
	OG	98.00 ± 2.39	93.59 ± 2.16	-4.41 ± 1.23	0.002**	0.01*	M2	-3.53	-9.000 to 2.122	0.235	>0.999
Insulin, mU/L	CG	18.40 (10.60)	11.90 (9.30)	-4.00 (9.80)	0.006**	0.036*	M1	0.167	-2.835 to 2.843	0.912	>0.999
	OG	14.10 (11.65)	12.10 (10.25)	-3.60 (7.30)	<0.001***	0.008**	M2	-0.117	-3.272 to 2.277	0.944	>0.999
HOMA-IR	CG	4.07 (2.29)	3.09 (3.10)	-0.94 (2.75)	0.004**	0.032*	M1	-0.083	-0.913 to 0.599	0.819	>0.999
	OG	3.31 (3.74)	2.92 (2.65)	-0.69 (1.84)	0.001***	0.008**	M2	-0.178	-1.033 to 0.508	0.678	>0.999
HbA1c, %	CG	5.6 (0.3)	5.5 (0.4)	-0.1 (0.3)	0.199	0.597	M1	0.009	-0.103 to 0.121	0.87	>0.999
	OG	5.5 (0.5)	5.4 (0.5)	-0.1 (0.3)	0.071	0.276	M2	0.033	-0.078 to 0.143	0.612	>0.999
TyG	CG	8.93 ± 0.11	8.81 ± 0.12	-0.12 ± 0.08	0.148	0.592	M1	0.005	-0.216 to 0.281	0.97	>0.999
	OG	8.91 ± 0.08	8.80 ± 0.10	-0.12 ± 0.07	0.134	0.276	M2	-0.024	-0.248 to 0.285	0.847	>0.999
HOMA-β	CG	193.66 (175.31)	129.82 (135.04)	-26.72 (109.40)	0.029*	0.145	M1	14.115	-17.856 to 40.732	0.377	>0.999
	OG	158.63 (66.10)	137.14 (77.61)	-20.27 (67.80)	0.069	0.276	M2	16.617	-15.220 to 40.025	0.362	>0.999
QUICKI	CG	0.311 ± 0.005	0.325 ± 0.006	0.014 ± 0.004	0.004**	0.032*	M1	0	-0.011 to 0.012	0.943	>0.999
	OG	0.319 ± 0.007	0.335 ± 0.008	0.015 ± 0.00	<0.001***	0.008**	M2	0.001	-0.012 to 0.014	0.876	>0.999
hsCRP, mg/dL	CG	1.81 (3.43)	2.19 (2.45)	0.31 (0.99)	0.498	0.876	M1	-1.151	-2.821 to 0.545	0.969	>0.999
	OG	2.29 (2.86)	2.00 (3.45)	-0.40 (1.10)	0.175	0.276	M2	-1.147	-3.257 to 0.866	0.932	>0.999
Kidney function
Creatinine, mg/dL	CG	0.84 (0.19)	0.80 (0.20)	0.02 (0.14)	0.364	0.597	M1	-0.035	-0.100 to 0.035	0.299	0.777
	OG	0.80 (0.26)	0.82 (0.29)	-0.01 (0.11)	0.64	>.0.999	M2	-0.027	-0.094 to 0.050	0.423	>0.999
GFR, mL/min	CG	88.19 ± 2.51	85.21 ± 2.86	-2.98 ± 2.21	0.199	0.597	M1	2.999	-1.660 to 7.270	0.259	0.777
	OG	85.01 ± 4.09	85.80 ± 3.48	0.79 ± 1.85	0.678	>.0.999	M2	2.943	-2.416 to 7.495	0.3	>0.999
Urea, mg/dL	CG	30.70 (13.70)	25.10 (9.30)	-5.0 (9.0)	0.008**	0.032*	M1	-2.897	-6.648 to 0.567	0.174	0.696
	OG	29.80 (11.50)	22.10 (5.90)	-8.5 (10.4)	< 0.001***	0.004**	M2	-1.816	-5.812 to 2.161	0.386	>0.999
Uric acid, mg/dL	CG	6.27 ± 0.30	6.47 ± 0.33	0.21 ± 0.18	0.258	0.597	M1	0.241	-0251 to 0.772	0.356	0.777
	OG	5.88 ± 0.33	6.35 ± 0.36	0.47 ± 0.18	0.021*	0.063	M2	0.314	-0.162 to 0.766	0.251	>0.999
Data are shown as mean ± SEM or median (IQR) depending on data distribution. n = 32 (REE: n = 30). Absolute change (∆) calculated as pre-intervention value subtracted from post-intervention value. 1P-value refers to paired student's t-test (or Wilcoxon test). 2P-value refers to linear regression model adjusted for pre-intervention value (M1) and additionally adjusted for BMI, age and sex (M2). 3P…

## Sheet: Supplementary Table S2-3
Supplementary Table S2-3: Postprandial clinical markers pre- and post-intervention
		Within-group comparison1					Between-group comparison2
		Pre	Post	∆	P	Padj.3		β	95 % CI	P	Padj.3
AUC
TG, mg * dL-1 * min	CG	17,471.50 (11,759.50)	14,280.00 (8927.25)	-1282.00 (4255.75)	0.051	0.255	M1	205.146	-2,380.402 to 3,438.193	0.904	>0.999
	OG	18,780.00 (5303.00)	15,870.00 (11,347.50)	-795.00 (4969.00)	0.214	0.576	M2	-38.749	-2,716.909 to 3,599.888	0.974	>0.999
NEFAs, mmol* L-1 * min	CG	37.17 (30.00)	52.79 (22.03)	7.72 (23.57)	0.404	0.808	M1	-1.438	-10.527 to 9.822	0.807	>0.999
	OG	38.64 (12.32)	45.47 (13.89)	5.69 (12.49)	0.003**	0.018*	M2	-0.515	-9.046 to 10.710	0.909	>0.999
Glucose, mg * dL-1 * min	CG	24,692.4 ± 1,450.1	22,633.6 ± 680.8	-2,595.1 ± 1,117.4	0.072	0.288	M1	-771.266	-2,347.044 to 617.108	0.341	>0.999
	OG	23,636.4 ± 1,527.2	21,223.5 ± 1,244.1	-2,412.9 ± 575.5	<0.001***	0.01**	M2	-1102.01	-2,377.032 to 136.705	0.112	>0.999
Insulin, mU * L-1 * min	CG	17,546.0 (11,521.0)	14,963.0 (9,775.0)	-3,035.0 (6,247.5)	0.012*	0.088	M1	-1478.48	-3,599.554 to 677.206	0.202	>0.999
	OG	18,087.0 (13,002.0)	11,959.0 (9,298.5)	-4,112.0 (5,003.0)	<0.001***	0.01**	M2	-1798.82	-4,036.841 to 400.937	0.158	>0.999
Indices
Disposition index	CG	2.11 (2.52)	2.83 (4.24)	0.71 (1.49)	<0.001***	0.01**	M1	-0.002	-0.856 to 0.667	0.906	>0.999
	OG	2.78 (4.46)	4.29 (4.59)	0.64 (1.30)	0.068	0.272	M2	0.167	-0.722 to 0.846	0.81	>0.999
Insulinogenic index	CG	1.27 (1.94)	1.33 (2.53)	0.15 (0.72)	0.578	0.808	M1	-0.276	-0.717 to 0.031	0.635	>0.999
	OG	1.15 (1.10)	1.00 (0.72)	0.01 (0.45)	0.202	0.576	M2	-0.22	-0.671 to 0.082	0.907	>0.999
OGIS	CG	339.02 ± 21.10	379.38 ± 16.91	40.36 ± 13.56	0.011*	0.088	M1	16.803	-14.100 to 49.935	0.317	>0.999
	OG	379.43 ± 18.59	426.40 ± 19.66	46.96 ± 11.67	<0.001***	0.01**	M2	22.134	-9.082 to 52.250	0.191	>0.999
Insulin sensitivity index	CG	1.96 (0.78)	2.29 (1.71)	0.47 (1.06)	0.009**	0.081	M1	0.27	-0.286 to 0.811	0.583	>0.999
	OG	2.65 (2.82)	3.27 (3.43)	0.62 (1.20)	<0.001***	0.01**	M2	0.317	-0.336 to 0.922	0.599	>0.999
Data are shown as mean ± SEM or median (IQR) depending on data distribution. CG: n = 14, OG: n = 17 (AUC NEFAs: n = 16). Absolute change (∆) calculated as pre-intervention value subtracted from post-intervention value. 1P-value refers to paired student`s t-test (or Wilcoxon test). 2P-value refers to linear regression model adjusted for pre-intervention value (M1) and additionally adjusted for BMI…
