# Supplementary material for: Cholesterol-lowering effects of oats induced by microbially produced phenolic metabolites
Source: Research Square preprint supplement (doi:10.21203/rs.3.rs-4188074/v1), 2024-07-16
Supplement: Supplementary file 4 [file 90db2c078534eb466b7b7773.xlsx]

## Sheet: Legend
The tables show the correlation matrices of the DIABLO models
Supplementary Table
S5-1	Model 1	To examine the correlations between changes in metabolic data, targeted plasma metabolomic pofile, global plasma and fecal metabolomic profiles as well as gut microbiota composition
S5-2	Model 2	To examine the correlations between changes in metabolic data, targeted plasma metabolomic pofile, global plasma and fecal metabolomic profiles as well as gut microbiota function
		Data key & chemical annotation descriptions
Biochemical name		Name of the identified biochemical
	Biochemical name	Indicates a compound that has been confirmed based on an authentic chemical standard and we are highly confident in its identity. (Metabolomics Standards Initiative Tier 1 identification)
	Biochemical name*	Indicates a compound that has not been confirmed based on a standard, but we are confident in its identity. (Not Tier 1)
	Biochemical name**	Indicates a compound for which a standard is not available, but we are reasonably confident in its identity or the information provided. (Not Tier 1)
	Biochemical name (#) or [#]	Indicates a compound that is a structural isomer of another compound in the Metabolon spectral library. For example, a steroid that may be sulfated at one of several positions that are indistinguishable by the mass spectrometry data or a diacylglycerol for which more than one stereospecific molecule exists.
Super pathway		The general biochemical class assigned to the identified biochemical (e.g. lipid, amino acid, carbohydrate, etc.) intended for sorting compounds by broad biochemical classes
Sub-pathway		A more specific biochemical class assigned to the identified biochemical (e.g. TCA cycle, monoacylglycerols, etc.) intended for grouping/sorting compounds by biochemical pathway/class

## Sheet: Supplementary Table S5-1
Data set	Selected feature	Super pathway	Sub-pathway	DHFA	FA	LDL	TC	DBP	SBP	Pulse	Body weight	BMI	FM	Creatinine	GFR	Bilirubin	Uric acid	ALT	Lipase	Glucose	HbA1c	NEFAs	Eggerthella	Erysipelotrichaceae_UCG-003	[Erysipelotrichaceae] uncultured	Marvinbryantia	Intestinimonas	plasma_biliverdin	plasma_margarate (17:0)	plasma_bilirubin (Z,Z)	plasma_vanillylmandelate (VMA)	plasma_dihomo-linoleate (20:2n6)	plasma_3-methylhistidine	plasma_palmitoylcarnitine (C16)	plasma_I-urobilinogen	plasma_eicosenoate (20:1)	plasma_laurylcarnitine (C12)	plasma_4-hydroxyhippurate	plasma_oleoylcarnitine (C18:1)	plasma_homostachydrine*	plasma_4-vinylphenol sulfate	plasma_N-acetyl-3-methylhistidine*	plasma_2S,3R-dihydroxybutyrate	plasma_1-adrenoyl-GPC (22:4)*	plasma_N-acetyl-1-methylhistidine*	plasma_2-aminophenol sulfate	plasma_2-aminoheptanoate	plasma_myristoleoylcarnitine (C14:1)*	plasma_2-acetamidophenol sulfate
Targeted metabolomic profile	DHFA	x	x	1	0.868236	-0.825049	-0.762007	-0.572207	-0.390821	0.266077	-0.187087	-0.187087	0.293429	-0.107116	0.240654	0.0826081	0.224531	-0.00862883	0.0108119	-0.150845	0.101189	0.100567	0.598032	0.731123	0.649525	-0.693402	0.426948	0.25882	0.142629	0.286155	0.415469	0.119151	-0.606782	0.251721	0.722775	0.121452	0.0934879	0.718375	0.284331	-0.658795	0.685402	-0.603847	-0.461706	0.200521	-0.384463	0.798557	0.490198	0.12975	0.794814
	FA	x	x	0.868236	1	-0.973607	-0.944641	-0.353536	-0.0839952	0.117343	0.160499	0.160499	0.366327	-0.449947	0.529737	-0.301046	-0.192726	-0.0509593	0.211288	-0.213523	0.0878568	-0.217357	0.710755	0.853621	0.186696	-0.759614	0.530497	-0.19708	-0.291123	-0.156138	0.0391076	-0.302339	-0.77214	-0.197138	0.802132	-0.255556	-0.36365	0.822492	-0.181108	-0.685432	0.829774	-0.664702	-0.740144	-0.122176	-0.565814	0.814707	0.617494	-0.355167	0.868423
Metabolic data	LDL	x	x	-0.825049	-0.973607	0.94958	0.924499	0.322361	0.0556004	-0.100724	-0.183145	-0.183145	-0.358686	0.461421	-0.533813	0.321427	0.219908	0.0525472	-0.219928	0.210733	-0.0834869	0.235443	-0.693567	-0.831917	-0.14163	0.736776	-0.519266	0.227282	0.315999	0.186745	-0.00665842	0.325788	0.757	0.226758	-0.778793	0.277084	0.387751	-0.800433	0.212691	0.662098	-0.81076	0.644958	0.735507	0.144199	0.559676	-0.785695	-0.604979	0.381871	-0.842142
	TC	x	x	-0.762007	-0.944641	0.924499	0.90609	0.27129	0.0042337	-0.0720507	-0.228745	-0.228745	-0.351866	0.492034	-0.552223	0.365657	0.274645	0.0565535	-0.240382	0.209865	-0.0771078	0.273677	-0.675914	-0.808733	-0.0611919	0.709558	-0.509079	0.287754	0.368429	0.247138	0.0532013	0.375779	0.744427	0.286143	-0.751504	0.322531	0.440209	-0.775953	0.275417	0.632442	-0.792118	0.62159	0.741916	0.187855	0.559726	-0.748057	-0.594163	0.439023	-0.810703
	DBP	x	x	-0.572207	-0.353536	0.322361	0.27129	0.41081	0.372239	-0.218412	0.295008	0.295008	-0.102971	-0.146458	0.0490053	-0.264229	-0.354112	-0.0203616	0.111325	0.0382657	-0.0579005	-0.234873	-0.230728	-0.290988	-0.591228	0.305056	-0.151292	-0.393594	-0.323129	-0.39922	-0.424924	-0.304359	0.204428	-0.385978	-0.311959	-0.279609	-0.31239	-0.295368	-0.411788	0.31094	-0.2556	0.263797	0.0667253	-0.287178	0.084957	-0.386299	-0.168812	-0.346526	-0.351002
	SBP	x	x	-0.390821	-0.0839952	0.0556004	0.0042337	0.372239	0.417575	-0.221894	0.408073	0.408073	0.00103531	-0.328369	0.238681	-0.418929	-0.489852	-0.041713	0.205191	-0.0266741	-0.0395459	-0.355318	-0.0350729	-0.0587596	-0.645134	0.107553	-0.00110725	-0.538649	-0.486146	-0.531483	-0.495963	-0.467462	-0.0172987	-0.529541	-0.101384	-0.421908	-0.497914	-0.0745841	-0.555028	0.139805	-0.0244503	0.0903486	-0.171459	-0.38567	-0.0903897	-0.186204	0.00744949	-0.535942	-0.125655
	Pulse	x	x	0.266077	0.117343	-0.100724	-0.0720507	-0.218412	-0.221894	0.123289	-0.198904	-0.198904	0.0265581	0.136329	-0.0841029	0.194117	0.238761	0.0177764	-0.0903568	-0.00201432	0.0269236	0.167451	0.0706817	0.0934822	0.347027	-0.111732	0.0398065	0.263643	0.229569	0.262969	0.259063	0.219089	-0.0481711	0.258934	0.11169	0.19902	0.230283	0.0993535	0.273284	-0.122904	0.0739975	-0.0958263	0.0338207	0.190167	0.00484067	0.156431	0.041821	0.250553	0.129129
	Body weight	x	x	-0.187087	0.160499	-0.183145	-0.228745	0.295008	0.408073	-0.198904	0.458644	0.458644	0.091455	-0.44822	0.37581	-0.504473	-0.550574	-0.0554085	0.262842	-0.0800784	-0.0189299	-0.418502	0.139365	0.150294	-0.616407	-0.0769923	0.129764	-0.601757	-0.571048	-0.584296	-0.499644	-0.554629	-0.208291	-0.592419	0.0938192	-0.496307	-0.601028	0.126363	-0.614635	-0.0255689	0.179641	-0.0712397	-0.358699	-0.426184	-0.232435	0.00982226	0.160018	-0.637986	0.0852525
	BMI	x	x	-0.187087	0.160499	-0.183145	-0.228745	0.295008	0.408073	-0.198904	0.458644	0.458644	0.091455	-0.44822	0.37581	-0.504473	-0.550574	-0.0554085	0.262842	-0.0800784	-0.0189299	-0.418502	0.139365	0.150294	-0.616407	-0.0769923	0.129764	-0.601757	-0.571048	-0.584296	-0.499644	-0.554629	-0.208291	-0.592419	0.0938192	-0.496307	-0.601028	0.126363	-0.614635	-0.0255689	0.179641	-0.0712397	-0.358699	-0.426184	-0.232435	0.00982226	0.160018	-0.637986	0.0852525
	FM	x	x	0.293429	0.366327	-0.358686	-0.351866	-0.102971	0.00103531	0.0265581	0.091455	0.091455	0.136659	-0.193196	0.215996	-0.144697	-0.109806	-0.0222311	0.0946726	-0.0816754	0.0296922	-0.108567	0.262276	0.313707	0.0196251	-0.274877	0.197701	-0.11521	-0.146205	-0.0993902	-0.0238441	-0.148939	-0.28922	-0.114526	0.291207	-0.127967	-0.174157	0.300874	-0.110524	-0.244721	0.307474	-0.240824	-0.289235	-0.075431	-0.217958	0.289324	0.2308	-0.17394	0.314043
	Creatinine	x	x	-0.107116	-0.449947	0.461421	0.492034	-0.146458	-0.328369	0.136329	-0.44822	-0.44822	-0.193196	0.52905	-0.490932	0.531672	0.538078	0.0639526	-0.293917	0.135863	-0.0108403	0.431009	-0.341768	-0.395627	0.477435	0.302764	-0.277452	0.583887	0.586418	0.556007	0.421847	0.575639	0.4207	0.575794	-0.330583	0.510453	0.63498	-0.365173	0.590113	0.235061	-0.413712	0.268294	0.541409	0.408124	0.3776	-0.261529	-0.330746	0.664448	-0.343728
	GFR	x	x	0.240654	0.529737	-0.533813	-0.552223	0.0490053	0.238681	-0.0841029	0.37581	0.37581	0.215996	-0.490932	0.475955	-0.465894	-0.45116	-0.0587211	0.265709	-0.143882	0.0243527	-0.372834	0.393501	0.461121	-0.335296	-0.372217	0.310997	-0.487378	-0.506429	-0.458375	-0.319132	-0.500132	-0.465701	-0.48113	0.40146	-0.441216	-0.557169	0.431911	-0.48929	-0.306375	0.470773	-0.328308	-0.553237	-0.337835	-0.394866	0.350341	0.368025	-0.578416	0.423675
	Bilirubin	x	x	0.0826081	-0.301046	0.321427	0.365657	-0.264229	-0.418929	0.194117	-0.504473	-0.504473	-0.144697	0.531672	-0.465894	0.571305	0.605596	0.0651096	-0.304844	0.112551	0.00835764	0.469673	-0.240618	-0.270981	0.624915	0.181338	-0.206722	0.660104	0.640151	0.636304	0.521345	0.624329	0.321348	0.650272	-0.204678	0.5567	0.68131	-0.241657	0.671567	0.117364	-0.298761	0.162756	0.47562	0.465212	0.319571	-0.117825	-0.250079	0.719135	-0.204396
	Uric acid	x	x	0.224531	-0.192726	0.219908	0.274645	-0.354112	-0.489852	0.238761	-0.550574	-0.550574	-0.109806	0.538078	-0.45116	0.605596	0.660931	0.0665164	-0.315532	0.0961402	0.0227186	0.50239	-0.167338	-0.180466	0.739934	0.0924682	-0.155803	0.722371	0.685514	0.701408	0.599779	0.665805	0.250082	0.711162	-0.11267	0.595791	0.721506	-0.151737	0.737829	0.0307341	-0.215694	0.085557	0.430633	0.511606	0.279053	-0.0118393	-0.192125	0.765871	-0.10239
	ALT	x	x	-0.00862883	-0.0509593	0.0525472	0.0565535	-0.0203616	-0.041713	0.0177764	-0.0554085	-0.0554085	-0.0222311	0.0639526	-0.0587211	0.0651096	0.0665164	0.0077498	-0.0357444	0.0158789	-0.000873305	0.0529306	-0.0389787	-0.0449497	0.061008	0.0338078	-0.0319019	0.0722462	0.0720414	0.0689717	0.0532053	0.0706252	0.0485521	0.0712293	-0.0370659	0.0626971	0.0777381	-0.0412975	0.073117	0.0257161	-0.047354	0.0300056	0.063892	0.050585	0.0442851	-0.028322	-0.0381126	0.0814867	-0.0383485
	Lipase	x	x	0.0108119	0.211288	-0.219928	-0.240382	0.111325	0.205191	-0.0903568	0.262842	0.262842	0.0946726	-0.293917	0.265709	-0.304844	-0.315532	-0.0357444	0.165712	-0.0693405	0.0010948	-0.2488	0.163548	0.187388	-0.302385	-0.136739	0.135685	-0.34315	-0.338798	-0.328741	-0.259292	-0.331533	-0.207759	-0.338219	0.151012	-0.294775	-0.363821	0.170797	-0.347942	-0.100167	0.199893	-0.121699	-0.283258	-0.24083	-0.194447	0.10818	0.162682	-0.382294	0.154862
	Glucose	x	x	-0.150845	-0.213523	0.210733	0.209865	0.0382657	-0.0266741	-0.00201432	-0.0800784	-0.0800784	-0.0816754	0.135863	-0.143882	0.112551	0.0961402	0.0158789	-0.0693405	0.0504397	-0.0152641	0.0870054	-0.154439	-0.183674	0.0285353	0.157441	-0.117995	0.102412	0.117646	0.0925178	0.0451864	0.118113	0.173797	0.101435	-0.167578	0.102746	0.135073	-0.175024	0.100636	0.13742	-0.182093	0.138179	0.183425	0.0691113	0.135801	-0.161161	-0.138295	0.137316	-0.179701
	HbA1c	x	x	0.101189	0.0878568	-0.0834869	-0.0771078	-0.0579005	-0.0395459	0.0269236	-0.0189299	-0.0189299	0.0296922	-0.0108403	0.0243527	0.00835764	0.0227186	-0.000873305	0.0010948	-0.0152641	0.0102392	0.0101752	0.060515	0.0739825	0.0657234	-0.0701653	0.0432031	0.0261881	0.014431	0.0289542	0.0420397	0.0120553	-0.0614006	0.0254698	0.0731375	0.0122882	0.00945829	0.0726923	0.0287696	-0.0666632	0.069356	-0.0611032	-0.0467208	0.0202894	-0.0389043	0.0808056	0.0496033	0.0131275	0.0804271
	NEFAs	x	x	0.100567	-0.217357	0.235443	0.273677	-0.234873	-0.355318	0.167451	-0.418502	-0.418502	-0.108567	0.431009	-0.372834	0.469673	0.50239	0.0529306	-0.2488	0.0870054	0.0101752	0.3872	-0.176899	-0.197317	0.532226	0.125296	-0.154849	0.548074	0.527926	0.529525	0.43984	0.514218	0.242592	0.539803	-0.143402	0.459019	0.559942	-0.173771	0.558287	0.074152	-0.221532	0.113068	0.373478	0.386857	0.248488	-0.0699094	-0.188195	0.592056	-0.14079
Microbiome composition (genera)	Eggerthella	x	x	0.598032	0.710755	-0.693567	-0.675914	-0.230728	-0.0350729	0.0706817	0.139365	0.139365	0.262276	-0.341768	0.393501	-0.240618	-0.167338	-0.0389787	0.163548	-0.154439	0.060515	-0.176899	0.50665	0.607492	0.0949345	-0.537275	0.37966	-0.173382	-0.237548	-0.143646	-0.00175988	-0.244456	-0.553731	-0.172877	0.568079	-0.208236	-0.290168	0.58426	-0.162932	-0.482241	0.59248	-0.47037	-0.540076	-0.110589	-0.410429	0.571992	0.442445	-0.286377	0.614074
	Erysipelotrichaceae_UCG-003	x	x	0.731123	0.853621	-0.831917	-0.808733	-0.290988	-0.0587596	0.0934822	0.150294	0.150294	0.313707	-0.395627	0.461121	-0.270981	-0.180466	-0.0449497	0.187388	-0.183674	0.0739825	-0.197317	0.607492	0.729077	0.139526	-0.647043	0.454213	-0.185733	-0.264604	-0.15045	0.0178528	-0.273619	-0.661705	-0.185495	0.683645	-0.232124	-0.327077	0.701923	-0.172573	-0.582507	0.709739	-0.566316	-0.639167	-0.116772	-0.487338	0.691739	0.528976	-0.321012	0.739642
	[Erysipelotrichaceae] uncultured	x	x	0.649525	0.186696	-0.14163	-0.0611919	-0.591228	-0.645134	0.347027	-0.616407	-0.616407	0.0196251	0.477435	-0.335296	0.624915	0.739934	0.061008	-0.302385	0.0285353	0.0657234	0.532226	0.0949345	0.139526	1	-0.208898	0.0324167	0.814502	0.728554	0.805886	0.762729	0.699256	-0.0181874	0.800534	0.2019	0.632116	0.742397	0.161988	0.84054	-0.254055	0.0855387	-0.177022	0.22004	0.584277	0.105831	0.332684	0.0243342	0.801198	0.242955
	Marvinbryantia	x	x	-0.693402	-0.759614	0.736776	0.709558	0.305056	0.107553	-0.111732	-0.0769923	-0.0769923	-0.274877	0.302764	-0.372217	0.181338	0.0924682	0.0338078	-0.136739	0.157441	-0.0701653	0.125296	-0.537275	-0.647043	-0.208898	0.581676	-0.398342	0.0905365	0.166726	0.0605665	-0.0822117	0.177137	0.577773	0.0915505	-0.612935	0.146873	0.219915	-0.625362	0.0768015	0.529428	-0.625486	0.508596	0.537326	0.0506116	0.415103	-0.631414	-0.462736	0.209495	-0.665284
	Intestinimonas	x	x	0.426948	0.530497	-0.519266	-0.509079	-0.151292	-0.00110725	0.0398065	0.129764	0.129764	0.197701	-0.277452	0.310997	-0.206722	-0.155803	-0.0319019	0.135685	-0.117995	0.0432031	-0.154849	0.37966	0.454213	0.0324167	-0.398342	0.286026	-0.163316	-0.208484	-0.140474	-0.0314016	-0.212557	-0.418314	-0.162383	0.421929	-0.182501	-0.24885	0.435747	-0.156435	-0.354915	0.444982	-0.348969	-0.417372	-0.106722	-0.31476	0.419734	0.333857	-0.2483	0.455116
Global plasma metabolomic profile	plasma_biliverdin	Cofactors and Vitamins	Hemoglobin and Porphyrin Metabolism	0.25882	-0.19708	0.227282	0.287754	-0.393594	-0.538649	0.263643	-0.601757	-0.601757	-0.11521	0.583887	-0.487378	0.660104	0.722371	0.0722462	-0.34315	0.102412	0.0261881	0.548074	-0.173382	-0.185733	0.814502	0.0905365	-0.163316	0.789717	0.747928	0.767307	0.65861	0.726144	0.263283	0.777418	-0.11209	0.65	0.786375	-0.15466	0.806907	0.0238709	-0.224725	0.0843177	0.461834	0.559553	0.298033	-0.00128285	-0.201917	0.835172	-0.099859
	plasma_margarate (17:0)	Lipid	Long Chain Saturated Fatty Acid	0.142629	-0.291123	0.315999	0.368429	-0.323129	-0.486146	0.229569	-0.571048	-0.571048	-0.146205	0.586418	-0.506429	0.640151	0.685514	0.0720414	-0.338798	0.117646	0.014431	0.527926	-0.237548	-0.264604	0.728554	0.166726	-0.208484	0.747928	0.71983	0.72282	0.601402	0.701027	0.326971	0.736624	-0.19122	0.62586	0.763157	-0.232607	0.761982	0.0972653	-0.297843	0.150578	0.506055	0.528024	0.336259	-0.0906961	-0.253543	0.807101	-0.187255
	plasma_bilirubin (Z,Z)	Cofactors and Vitamins	Hemoglobin and Porphyrin Metabolism	0.286155	-0.156138	0.186745	0.247138	-0.39922	-0.531483	0.262969	-0.584296	-0.584296	-0.0993902	0.556007	-0.458375	0.636304	0.701408	0.0689717	-0.328741	0.0925178	0.0289542	0.529525	-0.143646	-0.15045	0.805886	0.0605665	-0.140474	0.767307	0.72282	0.746846	0.647484	0.701034	0.229547	0.755241	-0.0801276	0.628084	0.757836	-0.121127	0.784762	-0.00206781	-0.189584	0.0579951	0.425496	0.544323	0.271304	0.0290305	-0.175103	0.806015	-0.0656658
	plasma_vanillylmandelate (VMA)	Amino Acid	Tyrosine Metabolism	0.415469	0.0391076	-0.00665842	0.0532013	-0.424924	-0.495963	0.259063	-0.499644	-0.499644	-0.0238441	0.421847	-0.319132	0.521345	0.599779	0.0532053	-0.259292	0.0451864	0.0420397	0.43984	-0.00175988	0.0178528	0.762729	-0.0822117	-0.0314016	0.65861	0.601402	0.647484	0.592809	0.579671	0.0684001	0.647683	0.072184	0.522113	0.619999	0.0387649	0.677281	-0.125495	-0.0218517	-0.0674197	0.251439	0.470394	0.143389	0.173204	-0.0470384	0.665116	0.0972233
	plasma_dihomo-linoleate (20:2n6)	Lipid	Long Chain Polyunsaturated Fatty Acid (n3 and n6)	0.119151	-0.302339	0.325788	0.375779	-0.304359	-0.467462	0.219089	-0.554629	-0.554629	-0.148939	0.575639	-0.500132	0.624329	0.665805	0.0706252	-0.331533	0.118113	0.0120553	0.514218	-0.244456	-0.273619	0.699256	0.177137	-0.212557	0.726144	0.701027	0.701034	0.579671	0.683118	0.332081	0.715233	-0.201687	0.609565	0.744396	-0.24207	0.739368	0.108508	-0.305195	0.159526	0.50426	0.512283	0.336645	-0.104924	-0.257906	0.786632	-0.199274
	plasma_3-methylhistidine	Amino Acid	Histidine Metabolism	-0.606782	-0.77214	0.757	0.744427	0.204428	-0.0172987	-0.0481711	-0.208291	-0.208291	-0.28922	0.4207	-0.465701	0.321348	0.250082	0.0485521	-0.207759	0.173797	-0.0614006	0.242592	-0.553731	-0.661705	-0.0181874	0.577773	-0.418314	0.263283	0.326971	0.229547	0.0684001	0.332081	0.612642	0.261506	-0.612553	0.286055	0.386546	-0.633979	0.253959	0.512793	-0.649757	0.506336	0.618249	0.173572	0.464488	-0.605499	-0.488663	0.387464	-0.659995
	plasma_palmitoylcarnitine (C16)	Lipid	Fatty Acid Metabolism (Acyl Carnitine, Long Chain Saturated)	0.251721	-0.197138	0.226758	0.286143	-0.385978	-0.529541	0.258934	-0.592419	-0.592419	-0.114526	0.575794	-0.48113	0.650272	0.711162	0.0712293	-0.338219	0.101435	0.0254698	0.539803	-0.172877	-0.185495	0.800534	0.0915505	-0.162383	0.777418	0.736624	0.755241	0.647683	0.715233	0.261506	0.765321	-0.11289	0.640184	0.774679	-0.154829	0.794273	0.0257339	-0.22377	0.0851215	0.456696	0.550781	0.295007	-0.00394137	-0.200637	0.822647	-0.101078
	plasma_I-urobilinogen	Cofactors and Vitamins	Hemoglobin and Porphyrin Metabolism	0.722775	0.802132	-0.778793	-0.751504	-0.311959	-0.101384	0.11169	0.0938192	0.0938192	0.291207	-0.330583	0.40146	-0.204678	-0.11267	-0.0370659	0.151012	-0.167578	0.0731375	-0.143402	0.568079	0.683645	0.2019	-0.612935	0.421929	-0.11209	-0.19122	-0.0801276	0.072184	-0.201687	-0.612553	-0.11289	0.646233	-0.16826	-0.247916	0.660202	-0.0980327	-0.556619	0.66184	-0.536039	-0.574339	-0.0652011	-0.442433	0.663259	0.490398	-0.238021	0.700957
	plasma_eicosenoate (20:1)	Lipid	Long Chain Monounsaturated Fatty Acid	0.121452	-0.255556	0.277084	0.322531	-0.279609	-0.421908	0.19902	-0.496307	-0.496307	-0.127967	0.510453	-0.441216	0.5567	0.595791	0.0626971	-0.294775	0.102746	0.0122882	0.459019	-0.208236	-0.232124	0.632116	0.146873	-0.182501	0.65	0.62586	0.628084	0.522113	0.609565	0.286055	0.640184	-0.16826	0.544165	0.663683	-0.204254	0.662159	0.086353	-0.260922	0.132589	0.441472	0.458842	0.29355	-0.0810058	-0.221867	0.701818	-0.165
	plasma_laurylcarnitine (C12)	Lipid	Fatty Acid Metabolism (Acyl Carnitine, Medium Chain)	0.0934879	-0.36365	0.387751	0.440209	-0.31239	-0.497914	0.230283	-0.601028	-0.601028	-0.174157	0.63498	-0.557169	0.68131	0.721506	0.0777381	-0.363821	0.135073	0.00945829	0.559942	-0.290168	-0.327077	0.742397	0.219915	-0.24885	0.786375	0.763157	0.757836	0.619999	0.744396	0.386546	0.774679	-0.247916	0.663683	0.812521	-0.29202	0.799924	0.1434	-0.359993	0.197286	0.569899	0.55411	0.383295	-0.144661	-0.300908	0.857473	-0.247946
	plasma_4-hydroxyhippurate	Xenobiotics	Benzoate Metabolism	0.718375	0.822492	-0.800433	-0.775953	-0.295368	-0.0745841	0.0993535	0.126363	0.126363	0.300874	-0.365173	0.431911	-0.241657	-0.151737	-0.0412975	0.170797	-0.175024	0.0726923	-0.173771	0.58426	0.701923	0.161988	-0.625362	0.435747	-0.15466	-0.232607	-0.121127	0.0387649	-0.24207	-0.633979	-0.154829	0.660202	-0.204254	-0.29202	0.676566	-0.141322	-0.564864	0.681876	-0.547175	-0.605633	-0.0951851	-0.46353	0.671667	0.507089	-0.284543	0.714977
	plasma_oleoylcarnitine (C18:1)	Lipid	Fatty Acid Metabolism (Acyl Carnitine, Monounsaturated)	0.284331	-0.181108	0.212691	0.275417	-0.411788	-0.555028	0.273284	-0.614635	-0.614635	-0.110524	0.590113	-0.48929	0.671567	0.737829	0.073117	-0.347942	0.100636	0.0287696	0.558287	-0.162932	-0.172573	0.84054	0.0768015	-0.156435	0.806907	0.761982	0.784762	0.677281	0.739368	0.253959	0.794273	-0.0980327	0.662159	0.799924	-0.141322	0.824902	0.00991111	-0.21313	0.0724368	0.45857	0.572104	0.294047	0.0160435	-0.194227	0.850223	-0.0840579
	plasma_homostachydrine*	Xenobiotics	Food Component/Plant	-0.658795	-0.685432	0.662098	0.632442	0.31094	0.139805	-0.122904	-0.0255689	-0.0255689	-0.244721	0.235061	-0.306375	0.117364	0.0307341	0.0257161	-0.100167	0.13742	-0.0666632	0.074152	-0.482241	-0.582507	-0.254055	0.529428	-0.354915	0.0238709	0.0972653	-0.00206781	-0.125495	0.108508	0.512793	0.0257339	-0.556619	0.086353	0.1434	-0.564864	0.00991111	0.48629	-0.559691	0.462523	0.46052	0.00443285	0.360201	-0.582018	-0.411369	0.130111	-0.605804
	plasma_4-vinylphenol sulfate	Xenobiotics	Benzoate Metabolism	0.685402	0.829774	-0.81076	-0.792118	-0.2556	-0.0244503	0.0739975	0.179641	0.179641	0.307474	-0.413712	0.470773	-0.298761	-0.215694	-0.047354	0.199893	-0.182093	0.069356	-0.221532	0.59248	0.709739	0.0855387	-0.625486	0.444982	-0.224725	-0.297843	-0.189584	-0.0218517	-0.305195	-0.649757	-0.22377	0.66184	-0.260922	-0.359993	0.681876	-0.21313	-0.559691	0.693512	-0.547749	-0.639902	-0.145017	-0.484699	0.663042	0.518918	-0.357067	0.714785
	plasma_N-acetyl-3-methylhistidine*	Amino Acid	Histidine Metabolism	-0.603847	-0.664702	0.644958	0.62159	0.263797	0.0903486	-0.0958263	-0.0712397	-0.0712397	-0.240824	0.268294	-0.328308	0.162756	0.085557	0.0300056	-0.121699	0.138179	-0.0611032	0.113068	-0.47037	-0.566316	-0.177022	0.508596	-0.348969	0.0843177	0.150578	0.0579951	-0.0674197	0.159526	0.506336	0.0851215	-0.536039	0.132589	0.197286	-0.547175	0.0724368	0.462523	-0.547749	0.444732	0.472332	0.0479202	0.364502	-0.55144	-0.405462	0.18851	-0.581675
	plasma_2S,3R-dihydroxybutyrate	Lipid	Fatty Acid, Dihydroxy	-0.461706	-0.740144	0.735507	0.741916	0.0667253	-0.171459	0.0338207	-0.358699	-0.358699	-0.289235	0.541409	-0.553237	0.47562	0.430633	0.063892	-0.283258	0.183425	-0.0467208	0.373478	-0.540076	-0.639167	0.22004	0.537326	-0.417372	0.461834	0.506055	0.425496	0.251439	0.50426	0.618249	0.456696	-0.574339	0.441472	0.569899	-0.605633	0.45857	0.46052	-0.639902	0.472332	0.68077	0.315753	0.497272	-0.535976	-0.490791	0.584858	-0.612759
	plasma_1-adrenoyl-GPC (22:4)*	Lipid	Lysophospholipid	0.200521	-0.122176	0.144199	0.187855	-0.287178	-0.38567	0.190167	-0.426184	-0.426184	-0.075431	0.408124	-0.337835	0.465212	0.511606	0.050585	-0.24083	0.0691113	0.0202894	0.386857	-0.110589	-0.116772	0.584277	0.0506116	-0.106722	0.559553	0.528024	0.544323	0.470394	0.512283	0.173572	0.550781	-0.0652011	0.458842	0.55411	-0.0951851	0.572104	0.00443285	-0.145017	0.0479202	0.315753	0.396791	0.202144	0.01405	-0.132651	0.589064	-0.0552612
	plasma_N-acetyl-1-methylhistidine*	Amino Acid	Histidine Metabolism	-0.384463	-0.565814	0.559676	0.559726	0.084957	-0.0903897	0.00484067	-0.232435	-0.232435	-0.217958	0.3776	-0.394866	0.319571	0.279053	0.0442851	-0.194447	0.135801	-0.0389043	0.248488	-0.410429	-0.487338	0.105831	0.415103	-0.31476	0.298033	0.336259	0.271304	0.143389	0.336645	0.464488	0.295007	-0.442433	0.29355	0.383295	-0.46353	0.294047	0.360201	-0.484699	0.364502	0.497272	0.202144	0.366479	-0.421407	-0.369314	0.391032	-0.473657
	plasma_2-aminophenol sulfate	Xenobiotics	Food Component/Plant	0.798557	0.814707	-0.785695	-0.748057	-0.386299	-0.186204	0.156431	0.00982226	0.00982226	0.289324	-0.261529	0.350341	-0.117825	-0.0118393	-0.028322	0.10818	-0.161161	0.0808056	-0.0699094	0.571992	0.691739	0.332684	-0.631414	0.419734	-0.00128285	-0.0906961	0.0290305	0.173204	-0.104924	-0.605499	-0.00394137	0.663259	-0.0810058	-0.144661	0.671667	0.0160435	-0.582018	0.663042	-0.55144	-0.535976	0.01405	-0.421407	0.697535	0.48606	-0.127044	0.722633
	plasma_2-aminoheptanoate	Lipid	Fatty Acid, Amino	0.490198	0.617494	-0.604979	-0.594163	-0.168812	0.00744949	0.041821	0.160018	0.160018	0.2308	-0.330746	0.368025	-0.250079	-0.192125	-0.0381126	0.162682	-0.138295	0.0496033	-0.188195	0.442445	0.528976	0.0243342	-0.462736	0.333857	-0.201917	-0.253543	-0.175103	-0.0470384	-0.257906	-0.488663	-0.200637	0.490398	-0.221867	-0.300908	0.507089	-0.194227	-0.411369	0.518918	-0.405462	-0.490791	-0.132651	-0.369314	0.48606	0.389869	-0.301062	0.52863
	plasma_myristoleoylcarnitine (C14:1)*	Lipid	Fatty Acid Metabolism (Acyl Carnitine, Monounsaturated)	0.12975	-0.355167	0.381871	0.439023	-0.346526	-0.535942	0.250553	-0.637986	-0.637986	-0.17394	0.664448	-0.578416	0.719135	0.765871	0.0814867	-0.382294	0.137316	0.0131275	0.592056	-0.286377	-0.321012	0.801198	0.209495	-0.2483	0.835172	0.807101	0.806015	0.665116	0.786632	0.387464	0.822647	-0.238021	0.701818	0.857473	-0.284543	0.850223	0.130111	-0.357067	0.18851	0.584858	0.589064	0.391032	-0.127044	-0.301062	0.90589	-0.235788
	plasma_2-acetamidophenol sulfate	Xenobiotics	Food Component/Plant	0.794814	0.868423	-0.842142	-0.810703	-0.351002	-0.125655	0.129129	0.0852525	0.0852525	0.314043	-0.343728	0.423675	-0.204396	-0.10239	-0.0383485	0.154862	-0.179701	0.0804271	-0.14079	0.614074	0.739642	0.242955	-0.665284	0.455116	-0.099859	-0.187255	-0.0656658	0.0972233	-0.199274	-0.659995	-0.101078	0.700957	-0.165	-0.247946	0.714977	-0.0840579	-0.605804	0.714785	-0.581675	-0.612759	-0.0552612	-0.473657	0.722633	0.52863	-0.235788	0.760927
	plasma_3-methoxycatechol sulfate (2)	Xenobiotics	Benzoate Metabolism	0.697538	0.780588	-0.758356	-0.732697	-0.297305	-0.0911396	0.104806	0.0990225	0.0990225	0.283969	-0.328413	0.395865	-0.20732	-0.118915	-0.036913	0.151041	-0.163895	0.0705839	-0.146394	0.553273	0.66552	0.184946	-0.595671	0.411393	-0.119251	-0.195438	-0.0879529	0.0612191	-0.205299	-0.597606	-0.119863	0.628253	-0.171863	-0.25094	0.64237	-0.105847	-0.540163	0.644894	-0.521009	-0.563193	-0.0707037	-0.433077	0.643288	0.478313	-0.241993	0.681165
	plasma_palmitoleoylcarnitine (C16:1)*	Lipid	Fatty Acid Metabolism (Acyl Carnitine, Monounsaturated)	0.274736	-0.224501	0.257251	0.323042	-0.426704	-0.587644	0.286921	-0.658835	-0.658835	-0.129229	0.641981	-0.53729	0.723868	0.79089	0.0793909	-0.376802	0.113841	0.0277985	0.600716	-0.195949	-0.210757	0.888039	0.105899	-0.183293	0.864499	0.819716	0.839641	0.719102	0.796021	0.294721	0.851065	-0.129835	0.712411	0.862383	-0.176526	0.88313	0.0323904	-0.253132	0.0982312	0.511323	0.612378	0.330782	-0.00890613	-0.226261	0.91561	-0.117085
	plasma_eicosenoylcarnitine (C20:1)*	Lipid	Fatty Acid Metabolism (Acyl Carnitine, Monounsaturated)	0.275627	-0.17003	0.200396	0.260623	-0.39596	-0.532296	0.262362	-0.588558	-0.588558	-0.104632	0.564023	-0.4671	0.642628	0.706526	0.0699014	-0.332751	0.0956991	0.0278889	0.534346	-0.153639	-0.16237	0.806327	0.0709079	-0.148053	0.772722	0.729326	0.751641	0.649317	0.707611	0.24067	0.760613	-0.0911066	0.633772	0.765436	-0.132527	0.790027	0.0070575	-0.201329	0.0670625	0.436904	0.547929	0.27983	0.0182808	-0.183967	0.813678	-0.0774755
	plasma_3-hydroxyoleoylcarnitine	Lipid	Fatty Acid Metabolism (Acyl Carnitine, Hydroxy)	0.234097	-0.253589	0.284305	0.346886	-0.399844	-0.565335	0.273247	-0.643104	-0.643104	-0.138346	0.63735	-0.538996	0.711129	0.772008	0.0786475	-0.37216	0.117894	0.0236863	0.588961	-0.215432	-0.234961	0.852148	0.130112	-0.196621	0.843365	0.803475	0.817829	0.694123	0.780966	0.313206	0.830372	-0.154814	0.69839	0.847388	-0.200717	0.860803	0.0563079	-0.27508	0.119237	0.521547	0.596773	0.340566	-0.0383039	-0.241353	0.898562	-0.144897
	plasma_tetradecadienedioate (C14:2-DC)*	Lipid	Fatty Acid, Dicarboxylate	0.130544	-0.289748	0.313567	0.363993	-0.309306	-0.469114	0.220873	-0.553219	-0.553219	-0.144373	0.570504	-0.493872	0.621182	0.664111	0.0700501	-0.329195	0.115489	0.0132081	0.512022	-0.235542	-0.26289	0.702517	0.167509	-0.20594	0.724466	0.698101	0.699856	0.580876	0.680024	0.322478	0.713541	-0.191538	0.606989	0.740582	-0.231706	0.737913	0.0997582	-0.294813	0.151107	0.495279	0.511318	0.32972	-0.0944959	-0.250217	0.782979	-0.188263
	plasma_vanilloylglycine	Xenobiotics	Food Component/Plant	0.683959	0.809338	-0.789521	-0.768962	-0.265939	-0.0437831	0.0824716	0.154746	0.154746	0.298357	-0.385742	0.445427	-0.269831	-0.185808	-0.0439543	0.184144	-0.175442	0.0692099	-0.197936	0.576693	0.691631	0.113998	-0.612206	0.431912	-0.19223	-0.265713	-0.158469	0.00261111	-0.273746	-0.629765	-0.19174	0.647192	-0.232965	-0.325465	0.66535	-0.18019	-0.5499	0.674235	-0.535935	-0.612797	-0.122219	-0.466065	0.652432	0.503258	-0.320799	0.699741
	plasma_1-methyl-5-imidazolelactate	Amino Acid	Histidine Metabolism	-0.384971	-0.60818	0.60391	0.608317	0.0608471	-0.133676	0.0240651	-0.287338	-0.287338	-0.237107	0.438445	-0.449622	0.383015	0.344962	0.0516923	-0.228837	0.149938	-0.0389559	0.300325	-0.443351	-0.524979	0.169749	0.442292	-0.342194	0.369736	0.406857	0.340064	0.197952	0.405694	0.506575	0.365675	-0.472535	0.35497	0.459004	-0.497748	0.36679	0.379857	-0.525016	0.388724	0.555288	0.2525	0.406188	-0.442484	-0.402243	0.47064	-0.504434
	plasma_2-methoxyhydroquinone sulfate (1)	Xenobiotics	Benzoate Metabolism	0.627122	0.799547	-0.783968	-0.771132	-0.210394	0.0194581	0.0490827	0.217271	0.217271	0.299606	-0.437011	0.483297	-0.334426	-0.260863	-0.0504485	0.215973	-0.180134	0.0634588	-0.252609	0.573478	0.68524	0.0164633	-0.598116	0.433325	-0.274718	-0.340498	-0.239745	-0.0726826	-0.345723	-0.634696	-0.272843	0.634166	-0.297877	-0.402255	0.65646	-0.26512	-0.530685	0.67299	-0.524178	-0.641073	-0.181224	-0.481494	0.626547	0.50623	-0.403346	0.683223
Global fecal metabolomic profile	feces_3-hydroxyphenylacetate	Amino Acid	Phenylalanine Metabolism	-0.693163	-0.665396	0.638328	0.601284	0.359635	0.20497	-0.155081	0.0462913	0.0462913	-0.232202	0.166422	-0.249649	0.038998	-0.0555293	0.0172056	-0.0596307	0.125878	-0.0701408	0.00896526	-0.46399	-0.563297	-0.352812	0.521332	-0.337211	-0.0704852	0.00828805	-0.0938768	-0.204938	0.0221947	0.483945	-0.0671411	-0.546086	0.00903519	0.0500619	-0.54928	-0.0865736	0.485947	-0.535697	0.454825	0.407647	-0.0624874	0.326407	-0.584872	-0.389338	0.030866	-0.596988
	feces_9,10-DiHOME	Lipid	Fatty Acid, Dihydroxy	0.562359	0.787685	-0.776905	-0.772797	-0.147513	0.0907882	0.0113626	0.287592	0.287592	0.30071	-0.494408	0.52553	-0.406962	-0.345277	-0.0577241	0.251662	-0.185244	0.0569057	-0.314035	0.569267	0.677332	-0.0935945	-0.581611	0.434477	-0.367502	-0.424525	-0.331199	-0.157556	-0.426578	-0.639613	-0.364068	0.618825	-0.370808	-0.488482	0.645762	-0.36067	-0.508466	0.6709	-0.51038	-0.672321	-0.247609	-0.498412	0.596706	0.509069	-0.496067	0.663891
	feces_asparagine	Amino Acid	Alanine and Aspartate Metabolism	-0.478531	-0.183984	0.152876	0.0984749	0.408554	0.427132	-0.234225	0.393214	0.393214	-0.0355034	-0.284412	0.186512	-0.390081	-0.47201	-0.0367474	0.184693	-0.00545011	-0.0484213	-0.334639	-0.106071	-0.144075	-0.665578	0.183629	-0.0540281	-0.520509	-0.458478	-0.517408	-0.501263	-0.438622	0.0596746	-0.511371	-0.181683	-0.397606	-0.463044	-0.156839	-0.538528	0.208572	-0.10729	0.156908	-0.098112	-0.374571	-0.0342039	-0.267997	-0.0541254	-0.502026	-0.212636
	feces_oleoyl ethanolamide	Lipid	Endocannabinoid	0.592599	0.781721	-0.768181	-0.758794	-0.183569	0.0455519	0.0342866	0.239668	0.239668	0.294981	-0.450929	0.490821	-0.355675	-0.287748	-0.0522959	0.225564	-0.179001	0.0599655	-0.271117	0.562284	0.670799	-0.0245787	-0.581955	0.426472	-0.30447	-0.365902	-0.269592	-0.102899	-0.369864	-0.625855	-0.302049	0.617831	-0.319887	-0.427436	0.64147	-0.296058	-0.51354	0.66091	-0.510261	-0.641877	-0.202768	-0.479671	0.604969	0.498777	-0.430914	0.664585
	feces_dihomo-linoleate (20:2n6)	Lipid	Long Chain Polyunsaturated Fatty Acid (n3 and n6)	-0.157143	0.083862	-0.100585	-0.133553	0.218138	0.289914	-0.143542	0.318399	0.318399	0.0537277	-0.302604	0.249266	-0.346579	-0.382217	-0.0375438	0.178986	-0.0501754	-0.0159003	-0.288461	0.0774198	0.0809471	-0.439671	-0.0320558	0.0759203	-0.418145	-0.393767	-0.40704	-0.35311	-0.381873	-0.124182	-0.411565	0.0426677	-0.342155	-0.412768	0.0649981	-0.427683	0.00200272	0.102317	-0.0307748	-0.231069	-0.296652	-0.147214	-0.01687	0.0946917	-0.43905	0.0346973
	feces_palmitoyl ethanolamide	Lipid	Endocannabinoid	0.543029	0.75707	-0.7465	-0.742163	-0.144503	0.0839958	0.0126067	0.273062	0.273062	0.288769	-0.472281	0.502852	-0.387613	-0.327834	-0.0551148	0.240108	-0.17769	0.0549497	-0.298859	0.546945	0.650903	-0.0849525	-0.559353	0.417245	-0.348804	-0.403966	-0.313996	-0.147516	-0.406079	-0.6141	-0.345576	0.595044	-0.352871	-0.465295	0.620707	-0.342119	-0.489357	0.644464	-0.490817	-0.644332	-0.234837	-0.477943	0.57445	0.488811	-0.472288	0.638507
	feces_agmatine	Amino Acid	Polyamine Metabolism	-0.792303	-0.730043	0.697727	0.652189	0.428836	0.265943	-0.191355	0.0929516	0.0929516	-0.251581	0.145968	-0.245582	-0.00164259	-0.111537	0.0142771	-0.0431263	0.133646	-0.0801725	-0.0275279	-0.506606	-0.61673	-0.450046	0.576357	-0.365627	-0.132863	-0.0419757	-0.157467	-0.274125	-0.0249434	0.522745	-0.128284	-0.602542	-0.0344322	0.0020704	-0.603195	-0.152019	0.541383	-0.583217	0.502466	0.423885	-0.108159	0.344325	-0.653474	-0.421231	-0.0227227	-0.66026
	feces_palmitoylcarnitine (C16)	Lipid	Fatty Acid Metabolism (Acyl Carnitine, Long Chain Saturated)	-0.145502	0.204917	-0.226142	-0.26999	0.276051	0.400442	-0.191678	0.461769	0.461769	0.107424	-0.464728	0.39665	-0.513625	-0.554328	-0.0572351	0.270109	-0.0891389	-0.014722	-0.424608	0.170701	0.188087	-0.602135	-0.111148	0.152915	-0.605237	-0.57913	-0.586058	-0.493227	-0.563377	-0.241807	-0.595988	0.129771	-0.503447	-0.612161	0.162948	-0.617263	-0.0567954	0.216068	-0.101092	-0.389356	-0.42785	-0.256257	0.0471284	0.186882	-0.648388	0.124327
	feces_isocaproate (i6:0)	Lipid	Fatty Acid, Branched	-0.610718	-0.742696	0.725903	0.709642	0.225807	0.0183255	-0.0643937	-0.164444	-0.164444	-0.275482	0.373471	-0.423824	0.271259	0.197445	0.0427833	-0.180849	0.16337	-0.0617988	0.201523	-0.530518	-0.635369	-0.0711051	0.559467	-0.398661	0.205955	0.271014	0.17441	0.0238297	0.27744	0.582282	0.205021	-0.59209	0.237384	0.326796	-0.610271	0.195707	0.500242	-0.621126	0.489967	0.574775	0.133231	0.435029	-0.59244	-0.464976	0.3245	-0.639317
	feces_docosapentaenoate (n3 DPA; 22:5n3)	Lipid	Long Chain Polyunsaturated Fatty Acid (n3 and n6)	-0.325429	-0.0559871	0.0317139	-0.0125188	0.318077	0.36218	-0.191211	0.3581	0.3581	0.00718594	-0.29366	0.216929	-0.369964	-0.429866	-0.0371976	0.182303	-0.0268906	-0.032929	-0.313137	-0.018348	-0.0365233	-0.558575	0.0806251	0.00813658	-0.472432	-0.428326	-0.46549	-0.43121	-0.412249	-0.0283097	-0.464502	-0.0745232	-0.371778	-0.439817	-0.0508372	-0.48642	0.109983	-0.00705618	0.0672717	-0.162002	-0.337934	-0.0884172	-0.148168	0.0170802	-0.472787	-0.0945216
	feces_N-acetyltryptophan	Amino Acid	Tryptophan Metabolism	-0.704571	-0.636567	0.607259	0.565441	0.388707	0.249604	-0.176002	0.0992383	0.0992383	-0.217996	0.111479	-0.201919	-0.0205983	-0.119089	0.0104646	-0.0279855	0.114609	-0.0712949	-0.0401214	-0.440677	-0.537204	-0.41958	0.504448	-0.316937	-0.139806	-0.0586313	-0.160802	-0.260283	-0.0430143	0.452268	-0.13542	-0.526859	-0.0491532	-0.0209955	-0.526198	-0.157158	0.475612	-0.506589	0.439619	0.35953	-0.111393	0.294287	-0.574884	-0.364737	-0.0442241	-0.577994
	feces_stearoylcarnitine (C18)	Lipid	Fatty Acid Metabolism (Acyl Carnitine, Long Chain Saturated)	-0.268049	0.0473408	-0.0715494	-0.117766	0.316387	0.395255	-0.200652	0.41756	0.41756	0.0482726	-0.377394	0.300467	-0.446252	-0.501249	-0.0471411	0.22681	-0.0534907	-0.0271226	-0.373592	0.0575976	0.0529957	-0.603306	0.00658553	0.0673712	-0.549265	-0.510341	-0.537014	-0.477279	-0.493617	-0.116449	-0.540416	0.00490039	-0.44328	-0.531142	0.0335898	-0.563133	0.0475221	0.0832847	0.00210011	-0.262242	-0.390829	-0.160909	-0.0759647	0.0869176	-0.567031	-0.0101507
	feces_homostachydrine*	Xenobiotics	Food Component/Plant	-0.655546	-0.716141	0.694459	0.668518	0.289566	0.103758	-0.106557	-0.0701626	-0.0701626	-0.258963	0.283332	-0.349287	0.168406	0.0842671	0.0316086	-0.127632	0.148174	-0.0663346	0.115977	-0.506385	-0.609938	-0.200561	0.548638	-0.375295	0.0821633	0.154249	0.0539695	-0.0803389	0.164166	0.544235	0.0831716	-0.578052	0.135919	0.204292	-0.589604	0.0691279	0.499601	-0.589429	0.479687	0.505231	0.045439	0.390553	-0.595955	-0.435912	0.194253	-0.627512
	feces_gulonate*	Cofactors and Vitamins	Ascorbate and Aldarate Metabolism	-0.100656	0.244515	-0.263833	-0.304923	0.250774	0.383601	-0.18005	0.454246	0.454246	0.120883	-0.47049	0.408303	-0.510921	-0.545299	-0.0577388	0.271136	-0.0961254	-0.010184	-0.420916	0.198035	0.221463	-0.574019	-0.142668	0.172491	-0.594762	-0.573847	-0.574311	-0.475458	-0.559123	-0.269678	-0.585815	0.162654	-0.498969	-0.609162	0.195698	-0.60566	-0.0866445	0.247436	-0.12855	-0.410972	-0.419652	-0.274122	0.0832667	0.209381	-0.643825	0.16045
	feces_galactosylglycerol	Lipid	Galactosyl Glycerolipids	-0.256602	0.149095	-0.17695	-0.232057	0.363276	0.486014	-0.240005	0.535866	0.535866	0.0932415	-0.511754	0.422871	-0.584342	-0.643272	-0.0634523	0.302239	-0.0860086	-0.0259639	-0.486078	0.135877	0.142985	-0.736575	-0.0601251	0.131862	-0.703624	-0.663479	-0.684642	-0.59248	-0.643605	-0.214891	-0.692579	0.0782938	-0.576537	-0.69598	0.115951	-0.719504	-0.00233112	0.178663	-0.0571863	-0.394069	-0.499038	-0.251845	-0.0215545	0.164099	-0.740033	0.0654636
	feces_2-oxo-1-pyrrolidinepropionate	Xenobiotics	Chemical	-0.573514	-0.660606	0.643175	0.624047	0.233496	0.0554255	-0.0774851	-0.106091	-0.106091	-0.242002	0.297293	-0.34999	0.19894	0.127393	0.033671	-0.139612	0.141062	-0.0580339	0.143644	-0.469533	-0.563909	-0.123237	0.501799	-0.350456	0.130276	0.192395	0.103228	-0.02576	0.199802	0.510093	0.130313	-0.529888	0.168889	0.240309	-0.543342	0.119728	0.452788	-0.548161	0.439101	0.488979	0.08077	0.373801	-0.538183	-0.407929	0.234711	-0.573678
	feces_prolylproline	Peptide	Dipeptide	-0.180669	0.11589	-0.135995	-0.175937	0.262128	0.353514	-0.174023	0.391612	0.391612	0.0705961	-0.376143	0.311959	-0.427952	-0.470105	-0.0466029	0.221753	-0.0642175	-0.0182807	-0.355748	0.10416	0.110376	-0.535335	-0.0493198	0.0999275	-0.514111	-0.485542	-0.499983	-0.431415	-0.471143	-0.162178	-0.506063	0.0628665	-0.421935	-0.50975	0.0904526	-0.525565	-0.00667125	0.136199	-0.0464899	-0.2925	-0.3645	-0.187606	-0.00979463	0.124047	-0.541786	0.053999
	feces_2-hydroxydecanoate	Lipid	Fatty Acid, Monohydroxy	-0.37479	-0.0309278	0.00145951	-0.0529947	0.385851	0.451916	-0.235707	0.456431	0.456431	0.0234812	-0.386852	0.293555	-0.476888	-0.547906	-0.0487641	0.237473	-0.0422212	-0.0379236	-0.402159	0.00497251	-0.0122371	-0.694716	0.0713772	0.0311515	-0.601579	-0.549852	-0.591239	-0.540451	-0.530086	-0.0660386	-0.591615	-0.0620306	-0.477373	-0.567156	-0.0314563	-0.618532	0.111203	0.0238599	0.0583368	-0.232816	-0.429573	-0.13345	-0.1541	0.0458242	-0.608261	-0.0845522
	feces_fructosyllysine	Amino Acid	Lysine Metabolism	-0.53872	-0.20417	0.169017	0.107464	0.461661	0.483919	-0.26505	0.446547	0.446547	-0.0386301	-0.324468	0.213821	-0.443618	-0.53603	-0.0418911	0.210346	-0.00712632	-0.0545116	-0.380385	-0.117114	-0.159571	-0.75382	0.204835	-0.0589059	-0.59104	-0.521124	-0.587341	-0.568171	-0.498661	0.0642365	-0.580678	-0.20244	-0.451948	-0.526622	-0.174181	-0.611398	0.233445	-0.117969	0.174959	-0.114524	-0.425239	-0.0412902	-0.300249	-0.0586304	-0.570784	-0.237241
	feces_linoleoyl ethanolamide	Lipid	Endocannabinoid	0.563729	0.783299	-0.772207	-0.767429	-0.151542	0.0844696	0.0143019	0.280021	0.280021	0.298585	-0.48647	0.518593	-0.398405	-0.336188	-0.0567513	0.247104	-0.183581	0.0570443	-0.306996	0.565748	0.673377	-0.0841601	-0.578991	0.431442	-0.357594	-0.414931	-0.321642	-0.149703	-0.417223	-0.634888	-0.354307	0.615861	-0.362465	-0.478278	0.642244	-0.350587	-0.506799	0.666523	-0.508026	-0.665268	-0.240624	-0.493683	0.595051	0.505394	-0.485293	0.66094
	feces_LAHSA (18:2/OH-18:0)*	Lipid	Fatty Acid Hydroxyl Fatty Acid	0.499866	0.704831	-0.695459	-0.692297	-0.128397	0.0855523	0.00793928	0.26177	0.26177	0.269413	-0.44625	0.473226	-0.368822	-0.314276	-0.0521355	0.227533	-0.166228	0.0505819	-0.284928	0.509646	0.606221	-0.090364	-0.519973	0.389232	-0.33468	-0.385236	-0.302083	-0.146161	-0.386886	-0.573197	-0.331511	0.553375	-0.336463	-0.442653	0.577778	-0.328725	-0.454118	0.600805	-0.456332	-0.604056	-0.225724	-0.447434	0.532703	0.456144	-0.449832	0.593504
	feces_8-methoxykynurenate	Amino Acid	Tryptophan Metabolism	0.841698	0.843114	-0.811831	-0.770526	-0.416252	-0.212451	0.172088	-0.0101207	-0.0101207	0.297882	-0.253028	0.34893	-0.100557	0.0120989	-0.0270963	0.101225	-0.164634	0.085171	-0.0543703	0.590751	0.715236	0.374574	-0.655536	0.432278	0.0253892	-0.0692881	0.0562492	0.202951	-0.0848663	-0.622659	0.0221999	0.688022	-0.0624949	-0.124275	0.695352	0.0440433	-0.606269	0.683984	-0.572329	-0.543422	0.0335924	-0.429464	0.727524	0.500153	-0.104249	0.750366
	feces_delta-CEHC	Cofactors and Vitamins	Tocopherol Metabolism	-0.179616	0.0669099	-0.0847189	-0.119372	0.232487	0.301352	-0.150703	0.325962	0.325962	0.0482935	-0.303909	0.247194	-0.352311	-0.391294	-0.0378019	0.180842	-0.0476439	-0.0181743	-0.29389	0.0659718	0.0667922	-0.45819	-0.0181116	0.0679873	-0.428347	-0.401287	-0.417678	-0.365791	-0.38877	-0.113096	-0.421545	0.0282404	-0.348638	-0.419494	0.0509211	-0.438523	0.0156281	0.0893541	-0.0186648	-0.224221	-0.304239	-0.140987	-0.0335538	0.0856709	-0.44683	0.01869
	feces_4-allylcatechol sulfate	Xenobiotics	Benzoate Metabolism	-0.339929	-0.0672004	0.0422389	-0.003052	0.327175	0.369274	-0.195704	0.362618	0.362618	0.00355488	-0.294102	0.215233	-0.373246	-0.435289	-0.0373154	0.183275	-0.0251649	-0.0343962	-0.316298	-0.0259489	-0.0459013	-0.570102	0.0897986	0.00283919	-0.478543	-0.432714	-0.471901	-0.439032	-0.416245	-0.0208828	-0.470476	-0.0840274	-0.375557	-0.44366	-0.0601425	-0.492936	0.118901	-0.0156826	0.0752425	-0.157204	-0.342498	-0.0841395	-0.159069	0.011045	-0.477284	-0.10505
	feces_cyclo(pro-sulfo-tyr)*	Peptide	Dipeptide	-0.426181	-0.114962	0.0850517	0.0314836	0.392317	0.431119	-0.23118	0.41434	0.41434	-0.00946068	-0.324196	0.229825	-0.421448	-0.497374	-0.041361	0.204591	-0.0212512	-0.0431239	-0.358546	-0.0564259	-0.0848482	-0.667695	0.132242	-0.0163765	-0.547346	-0.490742	-0.541165	-0.510307	-0.471237	0.00442175	-0.537994	-0.127129	-0.425813	-0.500739	-0.1002	-0.56462	0.163223	-0.0489393	0.111852	-0.154767	-0.392441	-0.0765448	-0.214572	-0.0100909	-0.540026	-0.153952
	feces_carboxymethylarginine	Amino Acid	Urea cycle; Arginine and Proline Metabolism	-0.276867	0.108562	-0.136259	-0.190241	0.361521	0.470142	-0.234805	0.509567	0.509567	0.0769	-0.476323	0.388103	-0.551281	-0.6117	-0.0592272	0.283207	-0.0752594	-0.0280146	-0.459727	0.105912	0.107778	-0.714586	-0.0313904	0.10832	-0.669566	-0.627704	-0.652742	-0.570932	-0.608208	-0.179737	-0.658946	0.0473783	-0.54536	-0.656427	0.0828721	-0.685388	0.0215899	0.142906	-0.031865	-0.3531	-0.475495	-0.222435	-0.0490465	0.136285	-0.699071	0.0327395
	feces_hexanoyltaurine	Lipid	Endocannabinoid	-0.145753	0.113952	-0.131094	-0.165459	0.223378	0.306416	-0.149839	0.342769	0.342769	0.0662247	-0.333116	0.278332	-0.376228	-0.411473	-0.0412091	0.195677	-0.0586681	-0.0147477	-0.312318	0.099948	0.107232	-0.463231	-0.0528846	0.0938971	-0.44981	-0.426195	-0.436983	-0.37477	-0.413816	-0.151223	-0.442811	0.0652275	-0.370396	-0.448206	0.089492	-0.459565	-0.0148102	0.129382	-0.0491757	-0.264169	-0.318681	-0.170632	0.00218538	0.116022	-0.475963	0.0583848
	feces_branched chain 14:0 dicarboxylic acid**	Lipid	Fatty Acid, Dicarboxylate	-0.708473	-0.783366	0.760359	0.733307	0.307471	0.102379	-0.110816	-0.0881668	-0.0881668	-0.284134	0.319846	-0.389745	0.196247	0.105884	0.0358215	-0.145651	0.163292	-0.0716903	0.136983	-0.554587	-0.667545	-0.20234	0.598955	-0.411701	0.104914	0.182558	0.0737863	-0.0745362	0.192926	0.597548	0.10577	-0.631394	0.160687	0.237782	-0.644802	0.0910622	0.544272	-0.645986	0.523781	0.558986	0.0604283	0.430951	-0.648708	-0.478439	0.227812	-0.68499
	feces_1-methyl-5-imidazolelactate	Amino Acid	Histidine Metabolism	-0.667572	-0.672165	0.647509	0.615113	0.32812	0.164901	-0.134885	0.00347535	0.00347535	-0.23783	0.205714	-0.281267	0.0850086	-0.00413186	0.0221035	-0.0831294	0.131739	-0.0675513	0.0474167	-0.471239	-0.570356	-0.291767	0.522143	-0.345103	-0.0141917	0.0608028	-0.0389102	-0.156432	0.0730291	0.497304	-0.0117483	-0.548149	0.0546545	0.104835	-0.554302	-0.0288997	0.482446	-0.545793	0.455908	0.435784	-0.0224671	0.343889	-0.578728	-0.399389	0.0892761	-0.597648
	feces_N-carbamoylputrescine	Amino Acid	Polyamine Metabolism	-0.480152	-0.57719	0.563684	0.550195	0.181445	0.0213823	-0.0537321	-0.120466	-0.120466	-0.213539	0.283876	-0.324451	0.203084	0.144644	0.0324492	-0.13667	0.126188	-0.0485867	0.150117	-0.411866	-0.493555	-0.0662083	0.435553	-0.309065	0.150402	0.201738	0.126071	0.00994978	0.207041	0.451095	0.149835	-0.460737	0.176772	0.244779	-0.474371	0.142176	0.390196	-0.481924	0.381381	0.442625	0.0966545	0.335686	-0.462466	-0.360327	0.242346	-0.497765
[truncated: 38 more columns]

## Sheet: Supplementary Table S5-2
Data set	Selected feature	Super pathway	Sub-pathway	DHFA	FA	LDL	Bilirubin	Uric acid	NEFAs	ko00740_Riboflavin metabolism	ko04973_Carbohydrate digestion and absorption	ko00627_Aminobenzoate degradation	ko00626_Naphthalene degradation	ko00401_Novobiocin biosynthesis	ko00910_Nitrogen metabolism	plasma_biliverdin	plasma_phenylalanine	plasma_bilirubin (Z,Z)	plasma_vanillylmandelate (VMA)	plasma_dihomo-linoleate (20:2n6)	plasma_2-hydroxyhippurate (salicylurate)	plasma_3-methylhistidine	plasma_palmitoylcarnitine (C16)	plasma_propionylcarnitine (C3)	plasma_I-urobilinogen	plasma_4-hydroxyhippurate	plasma_oleoylcarnitine (C18:1)	plasma_homostachydrine*	plasma_4-vinylphenol sulfate	plasma_bilirubin (E,Z or Z,E)*	plasma_2S,3R-dihydroxybutyrate	plasma_hydantoin-5-propionate	plasma_2-aminophenol sulfate	plasma_2-aminoheptanoate	plasma_myristoleoylcarnitine (C14:1)*	plasma_2-acetamidophenol sulfate	plasma_3-methoxycatechol sulfate (2)	plasma_palmitoleoylcarnitine (C16:1)*	plasma_eicosenoylcarnitine (C20:1)*	plasma_carotene diol (1)	plasma_dodecadienoate (12:2)*	plasma_tetradecadienedioate (C14:2-DC)*	plasma_vanilloylglycine	plasma_branched-chain, straight-chain, or cyclopropyl 12:1 fatty acid*	plasma_2-methoxyhydroquinone sulfate (1)	feces_3-hydroxyphenylacetate	feces_9,10-DiHOME	feces_asparagine	feces_oleoyl ethanolamide
Targeted metabolomics profile	DHFA	x	x	1	0.868236	-0.868236	0.164294	0.120823	0.0529319	-0.202248	-0.536995	0.728971	-0.747664	0.370022	0.396972	0.261373	0.162846	0.31825	0.410842	0.120458	0.599261	-0.631275	0.228002	-0.340865	0.707851	0.733336	0.266593	-0.668163	0.679207	0.284808	-0.483333	0.0676515	0.789179	0.472842	0.114215	0.790245	0.687027	0.259071	0.264576	-0.514549	0.275485	0.129478	0.665114	0.233036	0.619412	-0.683807	0.599052	-0.414184	0.54634
	FA	x	x	0.868236	1	-1	-0.330595	-0.2064	-0.294999	0.261222	-0.648811	0.300448	-0.918159	0.681524	0.601533	-0.198932	-0.216971	-0.154814	0.0286877	-0.301703	0.574029	-0.774123	-0.181978	-0.58328	0.808739	0.801033	-0.17796	-0.69706	0.845745	-0.0861451	-0.741431	-0.288649	0.819608	0.599902	-0.353609	0.869502	0.764442	-0.217148	-0.160278	-0.59212	-0.130806	-0.289386	0.792592	-0.166741	0.785353	-0.631863	0.826414	-0.137813	0.775239
Metabolic data	LDL	x	x	-0.868236	-1	1	0.330595	0.2064	0.294999	-0.261222	0.648811	-0.300448	0.918159	-0.681524	-0.601533	0.198932	0.216971	0.154814	-0.0286877	0.301703	-0.574029	0.774123	0.181978	0.58328	-0.808739	-0.801033	0.17796	0.69706	-0.845745	0.0861451	0.741431	0.288649	-0.819608	-0.599902	0.353609	-0.869502	-0.764442	0.217148	0.160278	0.59212	0.130806	0.289386	-0.792592	0.166741	-0.785353	0.631863	-0.826414	0.137813	-0.775239
	Bilirubin	x	x	0.164294	-0.330595	0.330595	0.936769	0.61831	0.664165	-0.87299	0.26276	0.758921	0.394319	-0.63178	-0.428593	0.861643	0.715679	0.881109	0.698098	0.800856	-0.00483506	0.330809	0.767865	0.496371	-0.25696	-0.195422	0.830895	0.11503	-0.380619	0.687782	0.539201	0.678945	-0.128747	-0.286354	0.889196	-0.22271	-0.209981	0.89244	0.793204	0.194928	0.756549	0.793716	-0.304275	0.747803	-0.37415	-0.0389897	-0.490414	-0.494438	-0.488676
	Uric acid	x	x	0.120823	-0.2064	0.2064	0.61831	0.40827	0.437568	-0.576839	0.166	0.508519	0.249855	-0.410873	-0.276871	0.570129	0.472857	0.583659	0.464453	0.528346	0.00445906	0.209561	0.508016	0.322172	-0.160007	-0.119202	0.549969	0.0671496	-0.241716	0.45606	0.34853	0.447479	-0.0746299	-0.182339	0.586377	-0.136426	-0.129369	0.590358	0.52515	0.121665	0.501177	0.523764	-0.191676	0.494883	-0.238223	-0.0343652	-0.314962	-0.330526	-0.314491
	NEFAs	x	x	0.0529319	-0.294999	0.294999	0.664165	0.437568	0.475048	-0.61573	0.224451	0.499079	0.333021	-0.479393	-0.334766	0.603686	0.50497	0.613988	0.476075	0.569111	-0.0426976	0.279647	0.538305	0.379926	-0.231452	-0.188784	0.581191	0.126598	-0.318671	0.47689	0.420107	0.484733	-0.1444	-0.237252	0.633166	-0.212168	-0.196242	0.626025	0.554168	0.17411	0.527045	0.563377	-0.262745	0.523521	-0.310097	0.0166556	-0.39253	-0.329125	-0.387828
KEGG pathways	ko00740_Riboflavin metabolism	x	x	-0.202248	0.261222	-0.261222	-0.87299	-0.576839	-0.61573	0.816039	-0.215368	-0.7374	-0.326143	0.564437	0.375523	-0.808557	-0.668842	-0.829403	-0.665161	-0.745318	-0.0258582	-0.273409	-0.720308	-0.440924	0.201369	0.143278	-0.78044	-0.0723698	0.316961	-0.649262	-0.47325	-0.630117	0.0789078	0.240392	-0.826544	0.165586	0.159059	-0.836868	-0.745548	-0.153891	-0.712265	-0.739184	0.247206	-0.702044	0.314015	0.0705881	0.422362	0.477343	0.423425
	ko04973_Carbohydrate digestion and absorption	x	x	-0.536995	-0.648811	0.648811	0.26276	0.166	0.224451	-0.215368	0.423772	-0.144873	0.601007	-0.46589	-0.403682	0.175493	0.178335	0.148855	0.0226601	0.236644	-0.361649	0.506628	0.159349	0.396144	-0.524112	-0.515672	0.160496	0.445528	-0.554622	0.0943488	0.498203	0.221315	-0.523476	-0.394358	0.274473	-0.560366	-0.493486	0.188756	0.147167	0.384126	0.126476	0.228474	-0.516707	0.148587	-0.516226	0.395501	-0.548857	0.0579168	-0.516539
	ko00627_Aminobenzoate degradation	x	x	0.728971	0.300448	-0.300448	0.758921	0.508519	0.499079	-0.7374	-0.144873	0.980432	-0.181702	-0.216825	-0.0575424	0.765704	0.602708	0.814276	0.742514	0.63654	0.364279	-0.154911	0.679347	0.139583	0.253776	0.312644	0.747305	-0.329137	0.149326	0.657938	0.0822633	0.518494	0.393749	0.0889354	0.694773	0.32839	0.274004	0.785928	0.719588	-0.178756	0.70053	0.637059	0.194313	0.668341	0.117183	-0.44694	0.023011	-0.601484	-0.00810895
	ko00626_Naphthalene degradation	x	x	-0.747664	-0.918159	0.918159	0.394319	0.249855	0.333021	-0.326143	0.601007	-0.181702	0.852975	-0.67034	-0.577506	0.269965	0.269861	0.233194	0.0512875	0.353929	-0.506761	0.718983	0.244725	0.568845	-0.74141	-0.727863	0.248097	0.62735	-0.787611	0.151426	0.713015	0.329042	-0.736928	-0.560462	0.409396	-0.791238	-0.69719	0.289408	0.228368	0.54357	0.198356	0.342284	-0.732361	0.229087	-0.733642	0.552956	-0.782609	0.0672921	-0.737287
	ko00401_Novobiocin biosynthesis	x	x	0.370022	0.681524	-0.681524	-0.63178	-0.410873	-0.479393	0.564437	-0.46589	-0.216825	-0.67034	0.664141	0.522806	-0.526526	-0.464191	-0.513185	-0.328026	-0.550018	0.30037	-0.564369	-0.47166	-0.546624	0.546064	0.511835	-0.500535	-0.418369	0.626019	-0.382572	-0.649764	-0.483356	0.488725	0.452089	-0.620358	0.560783	0.499991	-0.551111	-0.472842	-0.403139	-0.439536	-0.540117	0.560924	-0.453895	0.59149	-0.308867	0.669917	0.171334	0.642496
	ko00910_Nitrogen metabolism	x	x	0.396972	0.601533	-0.601533	-0.428593	-0.276871	-0.334766	0.375523	-0.403682	-0.0575424	-0.577506	0.522806	0.425621	-0.34062	-0.309293	-0.323535	-0.179187	-0.376132	0.293954	-0.486451	-0.305943	-0.435133	0.483595	0.462582	-0.321393	-0.387263	0.53679	-0.234859	-0.527642	-0.335632	0.45354	0.3853	-0.427117	0.50506	0.447972	-0.358456	-0.301916	-0.355951	-0.276716	-0.367871	0.4885	-0.292606	0.504209	-0.311269	0.557418	0.0670184	0.530848
Global plasma metabolomic profile	plasma_biliverdin	Cofactors and Vitamins	Hemoglobin and Porphyrin Metabolism	0.261373	-0.198932	0.198932	0.861643	0.570129	0.603686	-0.808557	0.175493	0.765704	0.269965	-0.526526	-0.34062	0.805058	0.662521	0.829032	0.674854	0.734359	0.0636806	0.226026	0.71688	0.407983	-0.150877	-0.0926064	0.777981	0.0276605	-0.265409	0.651263	0.430352	0.618657	-0.0262657	-0.204008	0.813147	-0.110702	-0.110964	0.832511	0.743834	0.116999	0.712087	0.728958	-0.198307	0.699398	-0.266375	-0.112716	-0.373312	-0.491961	-0.377732
	plasma_phenylalanine	Amino Acid	Phenylalanine Metabolism	0.162846	-0.216971	0.216971	0.715679	0.472857	0.50497	-0.668842	0.178335	0.602708	0.269861	-0.464191	-0.309293	0.662521	0.548204	0.679448	0.544423	0.611074	0.0193709	0.226241	0.590226	0.362774	-0.167376	-0.119797	0.639438	0.0614254	-0.262118	0.531767	0.389732	0.516728	-0.0671612	-0.198667	0.67773	-0.138274	-0.132601	0.685754	0.61082	0.127832	0.583482	0.606015	-0.204848	0.575228	-0.259517	-0.0558065	-0.34834	-0.39033	-0.34905
	plasma_bilirubin (Z,Z)	Cofactors and Vitamins	Hemoglobin and Porphyrin Metabolism	0.31825	-0.154814	0.154814	0.881109	0.583659	0.613988	-0.829403	0.148855	0.814276	0.233194	-0.513185	-0.323535	0.829032	0.679448	0.856354	0.705237	0.749899	0.0966158	0.194955	0.737974	0.39474	-0.114769	-0.0544108	0.801901	-0.00784172	-0.232253	0.674593	0.409744	0.629934	0.0157458	-0.181164	0.829326	-0.069677	-0.07548	0.856701	0.767223	0.0908419	0.735669	0.744916	-0.165078	0.720545	-0.236439	-0.150793	-0.34579	-0.520262	-0.353093
	plasma_vanillylmandelate (VMA)	Amino Acid	Tyrosine Metabolism	0.410842	0.0286877	-0.0286877	0.698098	0.464453	0.476075	-0.665161	0.0226601	0.742514	0.0512875	-0.328026	-0.179187	0.674854	0.544423	0.705237	0.605883	0.590874	0.174608	0.0418294	0.599944	0.242828	0.0320982	0.0823201	0.655092	-0.118689	-0.0621209	0.561304	0.230208	0.490691	0.145119	-0.0580656	0.650252	0.0803058	0.0584773	0.695517	0.628368	-0.0176914	0.606201	0.588604	-0.0133895	0.587533	-0.0753939	-0.230091	-0.162027	-0.46571	-0.176476
	plasma_dihomo-linoleate (20:2n6)	Lipid	Long Chain Polyunsaturated Fatty Acid (n3 and n6)	0.120458	-0.301703	0.301703	0.800856	0.528346	0.569111	-0.745318	0.236644	0.63654	0.353929	-0.550018	-0.376132	0.734359	0.611074	0.749899	0.590874	0.685073	-0.0164913	0.297007	0.654535	0.433165	-0.235183	-0.182876	0.707853	0.112515	-0.340757	0.584612	0.47287	0.581497	-0.126783	-0.255579	0.761044	-0.207475	-0.194421	0.760846	0.675536	0.177946	0.643842	0.678758	-0.274924	0.637208	-0.333972	-0.0193922	-0.433368	-0.415957	-0.430791
	plasma_2-hydroxyhippurate (salicylurate)	Xenobiotics	Benzoate Metabolism	0.599261	0.574029	-0.574029	-0.00483506	0.00445906	-0.0426976	-0.0258582	-0.361649	0.364279	-0.506761	0.30037	0.293954	0.0636806	0.0193709	0.0966158	0.174608	-0.0164913	0.370841	-0.427632	0.053707	-0.26698	0.466565	0.475326	0.0703971	-0.425927	0.462905	0.0979003	-0.359876	-0.0352802	0.502262	0.324687	-0.0303786	0.513589	0.448364	0.0587614	0.0734297	-0.340078	0.0843324	-0.0101069	0.445529	0.0590956	0.425222	-0.418107	0.425841	-0.199795	0.393073
	plasma_3-methylhistidine	Amino Acid	Histidine Metabolism	-0.631275	-0.774123	0.774123	0.330809	0.209561	0.279647	-0.273409	0.506628	-0.154911	0.718983	-0.564369	-0.486451	0.226026	0.226241	0.194955	0.0418294	0.297007	-0.427632	0.606043	0.204921	0.479001	-0.625122	-0.613818	0.207635	0.529165	-0.663853	0.126355	0.600574	0.276259	-0.621607	-0.472364	0.34363	-0.667242	-0.587904	0.242369	0.191065	0.458299	0.165815	0.287194	-0.617387	0.191766	-0.618324	0.466706	-0.659403	0.0578135	-0.621161
	plasma_palmitoylcarnitine (C16)	Lipid	Fatty Acid Metabolism (Acyl Carnitine, Long Chain Saturated)	0.228002	-0.181978	0.181978	0.767865	0.508016	0.538305	-0.720308	0.159349	0.679347	0.244725	-0.47166	-0.305943	0.71688	0.590226	0.737974	0.599944	0.654535	0.053707	0.204921	0.638384	0.365749	-0.138274	-0.0864197	0.692696	0.0281403	-0.240305	0.579549	0.386445	0.551586	-0.0275231	-0.184457	0.724859	-0.102859	-0.102558	0.741384	0.662242	0.107048	0.633862	0.64967	-0.180368	0.622761	-0.240858	-0.0970161	-0.336156	-0.436758	-0.339826
	plasma_propionylcarnitine (C3)	Lipid	Fatty Acid Metabolism (also BCAA Metabolism)	-0.340865	-0.58328	0.58328	0.496371	0.322172	0.379926	-0.440924	0.396144	0.139583	0.568845	-0.546624	-0.435133	0.407983	0.362774	0.39474	0.242828	0.433165	-0.26698	0.479001	0.365749	0.451563	-0.467905	-0.441771	0.387014	0.364244	-0.530364	0.292097	0.540342	0.382414	-0.425894	-0.382203	0.489552	-0.483414	-0.430206	0.427696	0.365019	0.34507	0.337957	0.424856	-0.477802	0.35135	-0.500089	0.277624	-0.561709	-0.117703	-0.537427
	plasma_I-urobilinogen	Cofactors and Vitamins	Hemoglobin and Porphyrin Metabolism	0.707851	0.808739	-0.808739	-0.25696	-0.160007	-0.231452	0.201369	-0.524112	0.253776	-0.74141	0.546064	0.483595	-0.150877	-0.167376	-0.114769	0.0320982	-0.235183	0.466565	-0.625122	-0.138274	-0.467905	0.65419	0.6487	-0.134215	-0.565191	0.682717	-0.0613786	-0.595926	-0.226105	0.664637	0.484057	-0.276266	0.704014	0.618772	-0.165297	-0.120315	-0.478881	-0.096819	-0.22526	0.640469	-0.12614	0.633706	-0.51413	0.665622	-0.118245	0.624044
	plasma_4-hydroxyhippurate	Xenobiotics	Benzoate Metabolism	0.733336	0.801033	-0.801033	-0.195422	-0.119202	-0.188784	0.143278	-0.515672	0.312644	-0.727863	0.511835	0.462582	-0.0926064	-0.119797	-0.0544108	0.0823201	-0.182876	0.475326	-0.613818	-0.0864197	-0.441771	0.6487	0.647474	-0.0778039	-0.568047	0.668998	-0.0137137	-0.569247	-0.182282	0.66846	0.473159	-0.218485	0.701929	0.615928	-0.10512	-0.0663108	-0.474377	-0.0449602	-0.173267	0.63135	-0.0754742	0.619491	-0.526932	0.64377	-0.155679	0.601503
	plasma_oleoylcarnitine (C18:1)	Lipid	Fatty Acid Metabolism (Acyl Carnitine, Monounsaturated)	0.266593	-0.17796	0.17796	0.830895	0.549969	0.581191	-0.78044	0.160496	0.747305	0.248097	-0.500535	-0.321393	0.777981	0.639438	0.801901	0.655092	0.707853	0.0703971	0.207635	0.692696	0.387014	-0.134215	-0.0778039	0.752029	0.016363	-0.244764	0.630481	0.406339	0.59581	-0.0131693	-0.188893	0.783504	-0.0943295	-0.0961622	0.804339	0.71917	0.104605	0.688815	0.702799	-0.180469	0.675966	-0.246609	-0.118834	-0.349729	-0.479311	-0.354785
	plasma_homostachydrine*	Xenobiotics	Food Component/Plant	-0.668163	-0.69706	0.69706	0.11503	0.0671496	0.126598	-0.0723698	0.445528	-0.329137	0.62735	-0.418369	-0.387263	0.0276605	0.0614254	-0.00784172	-0.118689	0.112515	-0.425927	0.529165	0.0281403	0.364244	-0.565191	-0.568047	0.016363	0.50199	-0.575445	-0.0319098	0.475803	0.119818	-0.591151	-0.405889	0.138769	-0.615125	-0.538823	0.0369024	0.00847946	0.412858	-0.00831024	0.104357	-0.546592	0.0196147	-0.531466	0.47502	-0.545765	0.171382	-0.507975
	plasma_4-vinylphenol sulfate	Xenobiotics	Benzoate Metabolism	0.679207	0.845745	-0.845745	-0.380619	-0.241716	-0.318671	0.316961	-0.554622	0.149326	-0.787611	0.626019	0.53679	-0.265409	-0.262118	-0.232253	-0.0621209	-0.340757	0.462905	-0.663853	-0.240305	-0.530364	0.682717	0.668998	-0.244764	-0.575445	0.727618	-0.153346	-0.662965	-0.315361	0.675818	0.518111	-0.393347	0.727473	0.641306	-0.283839	-0.225922	-0.500682	-0.197711	-0.329966	0.675489	-0.225584	0.67819	-0.504134	0.725453	-0.0506304	0.684025
	plasma_bilirubin (E,Z or Z,E)*	Cofactors and Vitamins	Hemoglobin and Porphyrin Metabolism	0.284808	-0.0861451	0.0861451	0.687782	0.45606	0.47689	-0.649262	0.0943488	0.657938	0.151426	-0.382572	-0.234859	0.651263	0.531767	0.674593	0.561304	0.584612	0.0979003	0.126355	0.579549	0.292097	-0.0613786	-0.0137137	0.630481	-0.0319098	-0.153346	0.532729	0.298189	0.489792	0.0427037	-0.121818	0.645798	-0.0233189	-0.0317993	0.672572	0.603585	0.0503515	0.579603	0.581107	-0.10194	0.566265	-0.158897	-0.14307	-0.244254	-0.418379	-0.25194
	plasma_2S,3R-dihydroxybutyrate	Lipid	Fatty Acid, Dihydroxy	-0.483333	-0.741431	0.741431	0.539201	0.34853	0.420107	-0.47325	0.498203	0.0822633	0.713015	-0.649764	-0.527642	0.430352	0.389732	0.409744	0.230208	0.47287	-0.359876	0.600574	0.386445	0.540342	-0.595926	-0.569247	0.406339	0.475803	-0.662965	0.298189	0.65424	0.421398	-0.55714	-0.476072	0.536653	-0.621665	-0.551591	0.452663	0.381911	0.438723	0.350495	0.462648	-0.602668	0.369808	-0.622985	0.380385	-0.689925	-0.0897387	-0.657377
	plasma_hydantoin-5-propionate	Amino Acid	Histidine Metabolism	0.0676515	-0.288649	0.288649	0.678945	0.447479	0.484733	-0.630117	0.221315	0.518494	0.329042	-0.483356	-0.335632	0.618657	0.516728	0.629934	0.490691	0.581497	-0.0352802	0.276259	0.551586	0.382414	-0.226105	-0.182282	0.59581	0.119818	-0.315361	0.489792	0.421398	0.494803	-0.136295	-0.235238	0.646675	-0.205326	-0.190516	0.641386	0.56825	0.170334	0.540765	0.575779	-0.258574	0.536592	-0.307446	0.00758702	-0.391713	-0.341015	-0.387646
	plasma_2-aminophenol sulfate	Xenobiotics	Food Component/Plant	0.789179	0.819608	-0.819608	-0.128747	-0.0746299	-0.1444	0.0789078	-0.523476	0.393749	-0.736928	0.488725	0.45354	-0.0262657	-0.0671612	0.0157458	0.145119	-0.126783	0.502262	-0.621607	-0.0275231	-0.425894	0.664637	0.66846	-0.0131693	-0.591151	0.675818	0.0427037	-0.55714	-0.136295	0.696198	0.476555	-0.157093	0.723777	0.633888	-0.0369376	-0.00415012	-0.485448	0.0153797	-0.117216	0.642354	-0.0176168	0.624001	-0.560481	0.640006	-0.205758	0.595454
	plasma_2-aminoheptanoate	Lipid	Fatty Acid, Amino	0.472842	0.599902	-0.599902	-0.286354	-0.182339	-0.237252	0.240392	-0.394358	0.0889354	-0.560462	0.452089	0.3853	-0.204008	-0.198667	-0.181164	-0.0580656	-0.255579	0.324687	-0.472364	-0.184457	-0.382203	0.484057	0.473159	-0.188893	-0.405889	0.518111	-0.121818	-0.476072	-0.235238	0.476555	0.369247	-0.29429	0.514728	0.454043	-0.217572	-0.174898	-0.355126	-0.154355	-0.247864	0.479972	-0.173718	0.483317	-0.352685	0.518874	-0.0252271	0.489789
	plasma_myristoleoylcarnitine (C14:1)*	Lipid	Fatty Acid Metabolism (Acyl Carnitine, Monounsaturated)	0.114215	-0.353609	0.353609	0.889196	0.586377	0.633166	-0.826544	0.274473	0.694773	0.409396	-0.620358	-0.427117	0.813147	0.67773	0.829326	0.650252	0.761044	-0.0303786	0.34363	0.724859	0.489552	-0.276266	-0.218485	0.783504	0.138769	-0.393347	0.645798	0.536653	0.646675	-0.157093	-0.29429	0.845832	-0.247038	-0.230424	0.842711	0.74753	0.20861	0.711991	0.753826	-0.319699	0.705448	-0.384588	-0.00791753	-0.494949	-0.455255	-0.49102
	plasma_2-acetamidophenol sulfate	Xenobiotics	Food Component/Plant	0.790245	0.869502	-0.869502	-0.22271	-0.136426	-0.212168	0.165586	-0.560366	0.32839	-0.791238	0.560783	0.50506	-0.110702	-0.138274	-0.069677	0.0803058	-0.207475	0.513589	-0.667242	-0.102859	-0.483414	0.704014	0.701929	-0.0943295	-0.615125	0.727473	-0.0233189	-0.621665	-0.205326	0.723777	0.514728	-0.247038	0.761099	0.668028	-0.124602	-0.0814467	-0.514914	-0.0579269	-0.197006	0.685855	-0.0907854	0.673906	-0.568801	0.701574	-0.162078	0.655889
	plasma_3-methoxycatechol sulfate (2)	Xenobiotics	Benzoate Metabolism	0.687027	0.764442	-0.764442	-0.209981	-0.129369	-0.196242	0.159059	-0.493486	0.274004	-0.69719	0.499991	0.447972	-0.110964	-0.132601	-0.07548	0.0584773	-0.194421	0.448364	-0.587904	-0.102558	-0.430206	0.618772	0.615928	-0.0961622	-0.538823	0.641306	-0.0317993	-0.551591	-0.190516	0.633888	0.454043	-0.230424	0.668028	0.586579	-0.12361	-0.0842903	-0.452684	-0.0631511	-0.185164	0.603709	-0.0916859	0.594442	-0.495826	0.620527	-0.133241	0.580622
	plasma_palmitoleoylcarnitine (C16:1)*	Lipid	Fatty Acid Metabolism (Acyl Carnitine, Monounsaturated)	0.259071	-0.217148	0.217148	0.89244	0.590358	0.626025	-0.836868	0.188756	0.785928	0.289408	-0.551111	-0.358456	0.832511	0.685754	0.856701	0.695517	0.760846	0.0587614	0.242369	0.741384	0.427696	-0.165297	-0.10512	0.804339	0.0369024	-0.283839	0.672572	0.452663	0.641386	-0.0369376	-0.217572	0.842711	-0.124602	-0.12361	0.861037	0.768917	0.12776	0.735826	0.755129	-0.21401	0.723174	-0.28411	-0.108628	-0.394869	-0.505619	-0.398811
	plasma_eicosenoylcarnitine (C20:1)*	Lipid	Fatty Acid Metabolism (Acyl Carnitine, Monounsaturated)	0.264576	-0.160278	0.160278	0.793204	0.52515	0.554168	-0.745548	0.147167	0.719588	0.228368	-0.472842	-0.301916	0.743834	0.61082	0.767223	0.628368	0.675536	0.0734297	0.191065	0.662242	0.365019	-0.120315	-0.0663108	0.71917	0.00847946	-0.225922	0.603585	0.381911	0.56825	-0.00415012	-0.174898	0.74753	-0.0814467	-0.0842903	0.768917	0.687849	0.0941665	0.659051	0.670818	-0.164828	0.64636	-0.228315	-0.120467	-0.326757	-0.460966	-0.332134
	plasma_carotene diol (1)	Cofactors and Vitamins	Vitamin A Metabolism	-0.514549	-0.59212	0.59212	0.194928	0.121665	0.17411	-0.153891	0.384126	-0.178756	0.54357	-0.403139	-0.355951	0.116999	0.127832	0.0908419	-0.0176914	0.177946	-0.340078	0.458299	0.107048	0.34507	-0.478881	-0.474377	0.104605	0.412858	-0.500682	0.0503515	0.438723	0.170334	-0.485448	-0.355126	0.20861	-0.514914	-0.452684	0.12776	0.0941665	0.350607	0.0767426	0.170656	-0.469268	0.0980404	-0.46491	0.374386	-0.48912	0.0821397	-0.458803
	plasma_dodecadienoate (12:2)*	Lipid	Fatty Acid, Dicarboxylate	0.275485	-0.130806	0.130806	0.756549	0.501177	0.527045	-0.712265	0.126476	0.70053	0.198356	-0.439536	-0.276716	0.712087	0.583482	0.735669	0.606201	0.643842	0.0843324	0.165815	0.633862	0.337957	-0.096819	-0.0449602	0.688815	-0.00831024	-0.197711	0.579603	0.350495	0.540765	0.0153797	-0.154355	0.711991	-0.0579269	-0.0631511	0.735826	0.659051	0.0767426	0.631996	0.639587	-0.140096	0.618917	-0.201445	-0.131027	-0.295337	-0.447465	-0.301729
	plasma_tetradecadienedioate (C14:2-DC)*	Lipid	Fatty Acid, Dicarboxylate	0.129478	-0.289386	0.289386	0.793716	0.523764	0.563377	-0.739184	0.228474	0.637059	0.342284	-0.540117	-0.367871	0.728958	0.606015	0.744916	0.588604	0.678758	-0.0101069	0.287194	0.64967	0.424856	-0.22526	-0.173267	0.702799	0.104357	-0.329966	0.581107	0.462648	0.575779	-0.117216	-0.247864	0.753826	-0.197006	-0.185164	0.755129	0.670818	0.170656	0.639587	0.672606	-0.265005	0.632586	-0.323875	-0.0262556	-0.422385	-0.415653	-0.420381
	plasma_vanilloylglycine	Xenobiotics	Food Component/Plant	0.665114	0.792592	-0.792592	-0.304275	-0.191676	-0.262745	0.247206	-0.516707	0.194313	-0.732361	0.560924	0.4885	-0.198307	-0.204848	-0.165078	-0.0133895	-0.274924	0.445529	-0.617387	-0.180368	-0.477802	0.640469	0.63135	-0.180469	-0.546592	0.675489	-0.10194	-0.602668	-0.258574	0.642354	0.479972	-0.319699	0.685855	0.603709	-0.21401	-0.164828	-0.469268	-0.140096	-0.265005	0.63036	-0.167524	0.628312	-0.488154	0.6661	-0.0816587	0.626313
	plasma_branched-chain, straight-chain, or cyclopropyl 12:1 fatty acid*	Partially Characterized Molecules	Partially Characterized Molecules	0.233036	-0.166741	0.166741	0.747803	0.494883	0.523521	-0.702044	0.148587	0.668341	0.229087	-0.453895	-0.292606	0.699398	0.575228	0.720545	0.587533	0.637208	0.0590956	0.191766	0.622761	0.35135	-0.12614	-0.0754742	0.675966	0.0196147	-0.225584	0.566265	0.369808	0.536592	-0.0176168	-0.173718	0.705448	-0.0907854	-0.0916859	0.723174	0.64636	0.0980404	0.618917	0.632586	-0.167524	0.607644	-0.226812	-0.102143	-0.31962	-0.429053	-0.323794
	plasma_2-methoxyhydroquinone sulfate (1)	Xenobiotics	Benzoate Metabolism	0.619412	0.785353	-0.785353	-0.37415	-0.238223	-0.310097	0.314015	-0.516226	0.117183	-0.733642	0.59149	0.504209	-0.266375	-0.259517	-0.236439	-0.0753939	-0.333972	0.425222	-0.618324	-0.240858	-0.500089	0.633706	0.619491	-0.246609	-0.531466	0.67819	-0.158897	-0.622985	-0.307446	0.624001	0.483317	-0.384588	0.673906	0.594442	-0.28411	-0.228315	-0.46491	-0.201445	-0.323875	0.628312	-0.226812	0.632628	-0.461931	0.679087	-0.0335004	0.640997
Global fecal metabolomic profile	feces_3-hydroxyphenylacetate	Amino Acid	Phenylalanine Metabolism	-0.683807	-0.631863	0.631863	-0.0389897	-0.0343652	0.0166556	0.0705881	0.395501	-0.44694	0.552956	-0.308867	-0.311269	-0.112716	-0.0558065	-0.150793	-0.230091	-0.0193922	-0.418107	0.466706	-0.0970161	0.277624	-0.51413	-0.526932	-0.118834	0.47502	-0.504134	-0.14307	0.380385	0.00758702	-0.560481	-0.352685	-0.00791753	-0.568801	-0.495826	-0.108628	-0.120467	0.374386	-0.131027	-0.0262556	-0.488154	-0.102143	-0.461931	0.473507	-0.457114	0.248842	-0.420231
	feces_9,10-DiHOME	Lipid	Fatty Acid, Dihydroxy	0.599052	0.826414	-0.826414	-0.490414	-0.314962	-0.39253	0.422362	-0.548857	0.023011	-0.782609	0.669917	0.557418	-0.373312	-0.34834	-0.34579	-0.162027	-0.433368	0.425841	-0.659403	-0.336156	-0.561709	0.665622	0.64377	-0.349729	-0.545765	0.725453	-0.244254	-0.689925	-0.391713	0.640006	0.518874	-0.494949	0.701574	0.620527	-0.394869	-0.326757	-0.48912	-0.295337	-0.422385	0.6661	-0.31962	0.679087	-0.457114	0.739976	0.0278548	0.701668
	feces_asparagine	Amino Acid	Alanine and Aspartate Metabolism	-0.414184	-0.137813	0.137813	-0.494438	-0.330526	-0.329125	0.477343	0.0579168	-0.601484	0.0672921	0.171334	0.0670184	-0.491961	-0.39033	-0.520262	-0.46571	-0.415957	-0.199795	0.0578135	-0.436758	-0.117703	-0.118245	-0.155679	-0.479311	0.171382	-0.0506304	-0.418379	-0.0897387	-0.341015	-0.205758	-0.0252271	-0.455255	-0.162078	-0.133241	-0.505619	-0.460966	0.0821397	-0.447465	-0.415653	-0.0816587	-0.429053	-0.0335004	0.248842	0.0278548	0.371386	0.0448136
	feces_oleoyl ethanolamide	Lipid	Endocannabinoid	0.54634	0.775239	-0.775239	-0.488676	-0.314491	-0.387828	0.423425	-0.516539	-0.00810895	-0.737287	0.642496	0.530848	-0.377732	-0.34905	-0.353093	-0.176476	-0.430791	0.393073	-0.621161	-0.339826	-0.537427	0.624044	0.601503	-0.354785	-0.507975	0.684025	-0.25194	-0.657377	-0.387646	0.595454	0.489789	-0.49102	0.655889	0.580622	-0.398811	-0.332134	-0.458803	-0.301729	-0.420381	0.626313	-0.323794	0.640997	-0.420231	0.701668	0.0448136	0.666258
	feces_dihomo-linoleate (20:2n6)	Lipid	Long Chain Polyunsaturated Fatty Acid (n3 and n6)	-0.212205	0.129609	-0.129609	-0.638227	-0.422537	-0.445938	0.599847	-0.11882	-0.578578	-0.184319	0.380793	0.243257	-0.598426	-0.491451	-0.617208	-0.505395	-0.543563	-0.0586641	-0.154216	-0.532787	-0.294	0.0973334	0.0538906	-0.578573	-0.0073031	0.182302	-0.485541	-0.307696	-0.45726	0.00390576	0.141091	-0.601506	0.0661123	0.0683267	-0.618613	-0.553368	-0.076151	-0.530185	-0.53976	0.133125	-0.520002	0.184185	0.0964575	0.263393	0.370673	0.267682
	feces_palmitoyl ethanolamide	Lipid	Endocannabinoid	0.529425	0.758121	-0.758121	-0.486781	-0.313459	-0.385356	0.422531	-0.505652	-0.0171558	-0.721983	0.632678	0.521596	-0.377947	-0.348265	-0.354217	-0.180185	-0.428815	0.382405	-0.60825	-0.33993	-0.528823	0.610152	0.587475	-0.355251	-0.495518	0.670007	-0.253464	-0.646022	-0.385359	0.580777	0.47992	-0.48848	0.640711	0.567342	-0.398827	-0.332757	-0.448663	-0.302734	-0.418602	0.612938	-0.32409	0.628074	-0.408287	0.688509	0.0496289	0.654044
	feces_agmatine	Amino Acid	Polyamine Metabolism	-0.757043	-0.674952	0.674952	-0.0904281	-0.0691355	-0.0156119	0.121773	0.419626	-0.528012	0.585312	-0.305967	-0.318952	-0.167319	-0.0975728	-0.21	-0.287494	-0.0620452	-0.457521	0.494117	-0.145351	0.278662	-0.549803	-0.566955	-0.172451	0.514217	-0.532557	-0.191692	0.388988	-0.0262939	-0.607085	-0.371546	-0.0539841	-0.611405	-0.532157	-0.164413	-0.172318	0.399965	-0.182011	-0.0691957	-0.518952	-0.149942	-0.486681	0.520409	-0.475482	0.297644	-0.435188
	feces_palmitoylcarnitine (C16)	Lipid	Fatty Acid Metabolism (Acyl Carnitine, Long Chain Saturated)	-0.163481	0.217155	-0.217155	-0.717198	-0.473864	-0.506023	0.670275	-0.178539	-0.604164	-0.270189	0.465032	0.309808	-0.66396	-0.549379	-0.680938	-0.545664	-0.612365	-0.0195912	-0.226515	-0.591506	-0.363416	0.167506	0.119822	-0.640831	-0.0613502	0.262451	-0.532944	-0.390386	-0.517809	0.0670613	0.198933	-0.679155	0.13832	0.132667	-0.687239	-0.612153	-0.127939	-0.584762	-0.607298	0.205068	-0.576478	0.259863	0.056127	0.348875	0.391256	0.349602
	feces_isocaproate (i6:0)	Lipid	Fatty Acid, Branched	-0.66992	-0.734142	0.734142	0.183095	0.111901	0.175753	-0.135108	0.472843	-0.282396	0.667519	-0.471054	-0.425062	0.0887125	0.1129	0.0538708	-0.0720323	0.170987	-0.434741	0.562921	0.0826171	0.406345	-0.594479	-0.593071	0.0750313	0.520055	-0.61362	0.0157491	0.52313	0.169875	-0.611953	-0.434071	0.203966	-0.643001	-0.564288	0.100301	0.0643443	0.434759	0.0446467	0.162166	-0.578832	0.0725132	-0.568311	0.481734	-0.591058	0.140074	-0.552395
	feces_taurolithocholate	Lipid	Secondary Bile Acid Metabolism	-0.244494	-0.0241064	0.0241064	-0.401918	-0.267502	-0.273572	0.383358	-0.00826806	-0.432373	-0.0228344	0.184915	0.0992946	-0.389439	-0.313748	-0.40737	-0.35119	-0.340022	-0.105445	-0.0184341	-0.346172	-0.136297	-0.0246499	-0.0536846	-0.378149	0.0739738	0.0296522	-0.324507	-0.127802	-0.282086	-0.0902018	0.029144	-0.374029	-0.0530305	-0.039599	-0.401273	-0.3628	0.0146822	-0.35018	-0.338799	0.00182113	-0.339097	0.0377932	0.138019	0.0876705	0.270808	0.0964235
	feces_indolepropionate	Amino Acid	Tryptophan Metabolism	-0.725069	-0.626594	0.626594	-0.12477	-0.0913186	-0.0424469	0.151855	0.387181	-0.532521	0.538898	-0.263994	-0.284768	-0.194594	-0.122349	-0.235897	-0.301802	-0.0921873	-0.433865	0.455021	-0.16985	0.243723	-0.510925	-0.529758	-0.198183	0.483069	-0.489417	-0.210483	0.34661	-0.0531963	-0.570605	-0.340584	-0.0882153	-0.570794	-0.496139	-0.193118	-0.196488	0.371349	-0.20416	-0.0986742	-0.479687	-0.17337	-0.446163	0.495352	-0.4307	0.302958	-0.392545
	feces_docosapentaenoate (n3 DPA; 22:5n3)	Lipid	Long Chain Polyunsaturated Fatty Acid (n3 and n6)	-0.393092	0.017907	-0.017907	-0.75513	-0.501743	-0.518326	0.716906	-0.0553193	-0.77169	-0.0986357	0.38023	0.218772	-0.724161	-0.586927	-0.754201	-0.640142	-0.640202	-0.157165	-0.0816667	-0.644025	-0.285275	0.00506129	-0.0484872	-0.702224	0.0920159	0.10661	-0.598485	-0.279549	-0.533496	-0.114084	0.0904463	-0.705579	-0.0430486	-0.0250085	-0.746919	-0.673074	-0.00985679	-0.648179	-0.637204	0.0524455	-0.630148	0.117748	0.21312	0.21146	0.486454	0.224288
	feces_oleoylcarnitine (C18:1)	Lipid	Fatty Acid Metabolism (Acyl Carnitine, Monounsaturated)	0.0271491	0.3711	-0.3711	-0.663641	-0.436203	-0.479911	0.611195	-0.272328	-0.449578	-0.400076	0.518642	0.373413	-0.594123	-0.501496	-0.600012	-0.451931	-0.570311	0.0921214	-0.336234	-0.530189	-0.414893	0.293321	0.251897	-0.570772	-0.183227	0.379897	-0.462984	-0.467403	-0.488589	0.211187	0.280173	-0.636107	0.280347	0.255743	-0.61708	-0.543392	-0.219197	-0.514861	-0.563735	0.321751	-0.514712	0.366309	-0.0724342	0.44868	0.301878	0.439612
	feces_homostachydrine*	Xenobiotics	Food Component/Plant	-0.706555	-0.742476	0.742476	0.131949	0.0777898	0.141301	-0.0860443	0.475106	-0.340806	0.669258	-0.450257	-0.415111	0.0385275	0.0727618	0.00109995	-0.118363	0.127831	-0.451571	0.564494	0.0380342	0.391433	-0.601897	-0.604267	0.0262227	0.533382	-0.614088	-0.0264796	0.510152	0.134271	-0.628047	-0.433337	0.156606	-0.654465	-0.573443	0.0486536	0.0174627	0.439748	-0.00072738	0.119107	-0.582685	0.0287821	-0.567397	0.503146	-0.583797	0.176397	-0.543718
	feces_dihomo-linolenate (20:3n3 or n6)	Lipid	Long Chain Polyunsaturated Fatty Acid (n3 and n6)	-0.357399	0.0248864	-0.0248864	-0.703107	-0.467066	-0.483181	0.66708	-0.0566786	-0.713243	-0.0990834	0.358298	0.207887	-0.673294	-0.546161	-0.700791	-0.593484	-0.596274	-0.141016	-0.0821527	-0.598829	-0.269417	0.011389	-0.0383401	-0.652774	0.079573	0.10588	-0.555798	-0.265415	-0.497198	-0.0990261	0.0888534	-0.65734	-0.0327292	-0.016867	-0.694553	-0.625592	-0.0140436	-0.602258	-0.593392	0.0552033	-0.585832	0.115711	0.192435	0.202967	0.450038	0.214441
	feces_2S,3R-dihydroxybutyrate	Lipid	Fatty Acid, Dihydroxy	-0.414216	-0.173208	0.173208	-0.426452	-0.285805	-0.280141	0.414592	0.0841646	-0.553742	0.105965	0.119564	0.0301011	-0.430785	-0.338849	-0.458332	-0.418597	-0.35759	-0.207533	0.0903075	-0.382179	-0.0764107	-0.146163	-0.179311	-0.420497	0.188204	-0.087437	-0.370484	-0.0434921	-0.291108	-0.225095	-0.0524484	-0.390209	-0.188451	-0.157392	-0.442113	-0.404944	0.103042	-0.394316	-0.35793	-0.112586	-0.376035	-0.0690873	0.254346	-0.0161704	0.339534	0.00156726
	feces_galactosylglycerol	Lipid	Galactosyl Glycerolipids	-0.163469	0.196892	-0.196892	-0.678222	-0.448225	-0.477943	0.634299	-0.16351	-0.576775	-0.248044	0.435368	0.288658	-0.628885	-0.519864	-0.645429	-0.518645	-0.578904	-0.024009	-0.207908	-0.560214	-0.339757	0.151525	0.106298	-0.60711	-0.0517276	0.241373	-0.505481	-0.363891	-0.4892	0.0560008	0.183343	-0.641866	0.123226	0.118844	-0.650829	-0.580032	-0.115973	-0.554288	-0.574206	0.18736	-0.546081	0.239483	0.0592615	0.323657	0.372985	0.324828
	feces_N-stearoyltaurine	Lipid	Endocannabinoid	-0.187866	0.0405183	-0.0405183	-0.422333	-0.28021	-0.291985	0.399337	-0.0501419	-0.411971	-0.082066	0.228492	0.137905	-0.401382	-0.327031	-0.416422	-0.348524	-0.358714	-0.0681363	-0.0683756	-0.35712	-0.173643	0.0276267	-0.0018384	-0.388763	0.0287941	0.0841923	-0.329317	-0.17538	-0.30007	-0.0370716	0.0678114	-0.395995	0.00323512	0.0098519	-0.414364	-0.372309	-0.0235844	-0.357814	-0.356699	0.0529937	-0.349077	0.088415	0.0969001	0.140828	0.261282	0.146256
	feces_2-oxo-1-pyrrolidinepropionate	Xenobiotics	Chemical	-0.602932	-0.652947	0.652947	0.14982	0.0908667	0.147395	-0.107783	0.419787	-0.264673	0.592264	-0.412558	-0.374435	0.0663736	0.0902774	0.0348493	-0.0752034	0.14104	-0.38957	0.499484	0.0623402	0.356626	-0.528894	-0.52857	0.0545803	0.464354	-0.544164	0.00362948	0.460644	0.141902	-0.54651	-0.384678	0.169251	-0.572905	-0.502551	0.0762902	0.0455765	0.386689	0.0284811	0.133243	-0.514149	0.0535902	-0.503654	0.432356	-0.522269	0.133082	-0.487643
	feces_N-palmitoylglycine	Lipid	Fatty Acid Metabolism (Acyl Glycine)	0.515978	0.75835	-0.75835	-0.511876	-0.330139	-0.402556	0.446376	-0.50726	-0.0430368	-0.724938	0.645125	0.52868	-0.402056	-0.367785	-0.379347	-0.201573	-0.450083	0.376945	-0.610692	-0.36137	-0.538135	0.610024	0.585561	-0.378636	-0.492188	0.673255	-0.273418	-0.655085	-0.403068	0.576665	0.48272	-0.511912	0.638953	0.566225	-0.42369	-0.355175	-0.448774	-0.324332	-0.439775	0.614397	-0.345072	0.631717	-0.400937	0.695266	0.0659246	0.661249
	feces_fructosyllysine	Amino Acid	Lysine Metabolism	-0.551657	-0.151733	0.151733	-0.719723	-0.480473	-0.482441	0.692246	0.0535393	-0.844102	0.0548528	0.274772	0.122467	-0.7103	-0.56621	-0.748675	-0.662688	-0.606539	-0.259164	0.0477845	-0.630837	-0.193912	-0.132393	-0.186109	-0.691325	0.213149	-0.0343383	-0.600345	-0.16112	-0.499109	-0.256676	-0.00912165	-0.66489	-0.192169	-0.155757	-0.730587	-0.664379	0.0906113	-0.643812	-0.605554	-0.0809546	-0.619169	-0.0126182	0.326503	0.0766944	0.523325	0.0985828
	feces_linoleoyl ethanolamide	Lipid	Endocannabinoid	0.560392	0.7816	-0.7816	-0.475141	-0.305408	-0.378996	0.410221	-0.519754	0.0100214	-0.741412	0.63915	0.530333	-0.363957	-0.33826	-0.338393	-0.162921	-0.41946	0.400219	-0.62467	-0.327609	-0.535401	0.629385	0.60791	-0.341327	-0.51459	0.687496	-0.240028	-0.656535	-0.378455	0.603355	0.491941	-0.478675	0.662644	0.586292	-0.384684	-0.319165	-0.462585	-0.289081	-0.40903	0.630557	-0.311764	0.643828	-0.428935	0.70282	0.0337321	0.666797
	feces_carotene diol (2)	Cofactors and Vitamins	Vitamin A Metabolism	-0.516227	-0.496506	0.496506	0.00803865	-0.00129316	0.0395722	0.0186998	0.313033	-0.311083	0.438745	-0.261699	-0.255326	-0.0513712	-0.0137536	-0.0796998	-0.147729	0.0175318	-0.319897	0.370229	-0.0431555	0.232339	-0.403507	-0.410809	-0.0572916	0.367867	-0.40086	-0.081606	0.312645	0.0332352	-0.433768	-0.281248	0.0298753	-0.443926	-0.387613	-0.0470008	-0.0600631	0.294147	-0.0696188	0.0119953	-0.385556	-0.0478864	-0.368329	0.360486	-0.369343	0.170296	-0.341071
	feces_8-methoxykynurenate	Amino Acid	Tryptophan Metabolism	0.891723	0.846981	-0.846981	0.00663664	0.0157337	-0.0535705	-0.0512449	-0.532811	0.551777	-0.746216	0.436433	0.429908	0.107206	0.0392984	0.156369	0.26941	-0.0126652	0.550255	-0.629726	0.0910225	-0.388879	0.688592	0.702499	0.11672	-0.630377	0.681337	0.155424	-0.526104	-0.0423453	0.743456	0.477611	-0.0319713	0.758879	0.662274	0.10036	0.120664	-0.5018	0.136304	-0.00329601	0.656676	0.0987233	0.625511	-0.621044	0.624716	-0.303784	0.576113
	feces_delta-CEHC	Cofactors and Vitamins	Tocopherol Metabolism	-0.189885	0.123056	-0.123056	-0.584706	-0.387046	-0.408839	0.549316	-0.111573	-0.527283	-0.172668	0.3511	0.225057	-0.547729	-0.450065	-0.564687	-0.46167	-0.498074	-0.0509486	-0.144495	-0.487674	-0.271339	0.0926792	0.0529479	-0.529492	-0.00989781	0.17049	-0.44406	-0.284586	-0.419155	0.00736042	0.131697	-0.551259	0.0644322	0.0659696	-0.566259	-0.506379	-0.0723218	-0.485059	-0.494542	0.125309	-0.475921	0.171931	0.0852146	0.244497	0.338063	0.24818
	feces_cyclo(pro-sulfo-tyr)*	Peptide	Dipeptide	-0.323647	-0.0956411	0.0956411	-0.409519	-0.273511	-0.273868	0.394379	0.0363217	-0.486277	0.0394175	0.151513	0.0649399	-0.405265	-0.322546	-0.427638	-0.379964	-0.344917	-0.153492	0.0341144	-0.359881	-0.106036	-0.0828957	-0.113607	-0.394575	0.128196	-0.0270329	-0.343243	-0.0858707	-0.283474	-0.154203	-0.0104453	-0.3779	-0.117675	-0.0958972	-0.416731	-0.379289	0.0570705	-0.367761	-0.344459	-0.0532812	-0.353328	-0.0140621	0.19258	0.036756	0.30106	0.0497431
	feces_carboxymethylarginine	Amino Acid	Urea cycle; Arginine and Proline Metabolism	-0.158991	0.112522	-0.112522	-0.507813	-0.336071	-0.355461	0.476777	-0.100456	-0.454308	-0.154943	0.307861	0.19834	-0.475027	-0.39065	-0.489428	-0.399198	-0.432696	-0.0405887	-0.129697	-0.422972	-0.238266	0.085083	0.0506663	-0.459123	-0.0127941	0.152618	-0.384661	-0.250685	-0.364346	0.0113431	0.117568	-0.479019	0.0610165	0.0617086	-0.491167	-0.439022	-0.0661576	-0.4204	-0.429565	0.113212	-0.412713	0.153499	0.0698797	0.216522	0.291608	0.219397
	feces_hexanoyltaurine	Lipid	Endocannabinoid	-0.176656	0.158858	-0.158858	-0.629281	-0.416199	-0.441819	0.589791	-0.136711	-0.550482	-0.209133	0.391582	0.255683	-0.58634	-0.48331	-0.603065	-0.488638	-0.536615	-0.0377137	-0.175174	-0.522189	-0.304231	0.121223	0.0788815	-0.566409	-0.0302881	0.204766	-0.473228	-0.322766	-0.452575	0.0310781	0.156658	-0.594474	0.0930011	0.0916476	-0.606502	-0.541403	-0.0934887	-0.517963	-0.53252	0.155358	-0.509296	0.204579	0.0723994	0.282679	0.354494	0.28513
	feces_branched chain 14:0 dicarboxylic acid**	Lipid	Fatty Acid, Dicarboxylate	-0.751418	-0.80946	0.80946	0.178469	0.107819	0.177753	-0.126715	0.519988	-0.335649	0.733434	-0.507882	-0.462171	0.0752976	0.106265	0.035918	-0.0994407	0.168694	-0.484574	0.618554	0.0710713	0.439445	-0.655763	-0.655879	0.0608865	0.576674	-0.673715	-0.00128762	0.56848	0.170795	-0.678758	-0.476114	0.203042	-0.710801	-0.623389	0.0873738	0.050004	0.479386	0.029047	0.159054	-0.637021	0.0603559	-0.623377	0.538169	-0.645552	0.169721	-0.602493
	feces_N-carbamoylputrescine	Amino Acid	Polyamine Metabolism	-0.467176	-0.519421	0.519421	0.142023	0.0874681	0.132894	-0.107455	0.335274	-0.186858	0.473653	-0.339411	-0.304205	0.0747686	0.0895906	0.0506308	-0.0402933	0.13155	-0.304799	0.399408	0.0691262	0.292075	-0.420449	-0.418563	0.0647297	0.366209	-0.435672	0.0210857	0.374561	0.12899	-0.430825	-0.308442	0.155957	-0.45396	-0.398601	0.0833411	0.0566882	0.307589	0.0423459	0.125263	-0.410173	0.0617509	-0.403819	0.337098	-0.421462	0.0909613	-0.394335
[truncated: 26 more columns]
