# Supplementary material for: Cholesterol-lowering effects of oats induced by microbially produced phenolic metabolites
Source: Research Square preprint supplement (doi:10.21203/rs.3.rs-4188074/v1), 2024-07-16
Supplement: Supplementary file 5 [file b8a19866b4c6901b4bdc4b01.xlsx]

## Sheet: Legend
The tables show detail information on the performed linear regression models adjusted for baseline value, age, sex and BMI for plasma and fecal metabolites
Supplementary Table
S4-1	Plasma metabolites
S4-2	Fecal metabolites
		Data key & chemical annotation descriptions
CHEM ID		Unique identifier for each biochemical.
Biochemical name		Name of the identified biochemical
	Biochemical name	Indicates a compound that has been confirmed based on an authentic chemical standard and we are highly confident in its identity. (Metabolomics Standards Initiative Tier 1 identification)
	Biochemical name*	Indicates a compound that has not been confirmed based on a standard, but we are confident in its identity. (Not Tier 1)
	Biochemical name**	Indicates a compound for which a standard is not available, but we are reasonably confident in its identity or the information provided. (Not Tier 1)
	Biochemical name (#) or [#]	Indicates a compound that is a structural isomer of another compound in the Metabolon spectral library. For example, a steroid that may be sulfated at one of several positions that are indistinguishable by the mass spectrometry data or a diacylglycerol for which more than one stereospecific molecule exists.
Super pathway		The general biochemical class assigned to the identified biochemical (e.g. lipid, amino acid, carbohydrate, etc.) intended for sorting compounds by broad biochemical classes
Sub-pathway		A more specific biochemical class assigned to the identified biochemical (e.g. TCA cycle, monoacylglycerols, etc.) intended for grouping/sorting compounds by biochemical pathway/class

## Sheet: Supplementary Table S4-1
CHEM_ID	Biochemical name	Super pathway	Sub-pathway	β-estimate	95 % CI	P-value	q-value
100004322	2-aminophenol sulfate	Xenobiotics	Food Component/Plant	2.51336	1.953, 3.073	0	1e-06
100006190	2-acetamidophenol sulfate	Xenobiotics	Food Component/Plant	2.8202	2.115, 3.526	0	5e-06
100004089	2-hydroxydecanoate	Lipid	Fatty Acid, Monohydroxy	0.900089	0.661, 1.139	0	1e-05
100021363	vanilloylglycine	Xenobiotics	Food Component/Plant	1.44133	0.994, 1.889	0	0.000122
100001755	4-vinylphenol sulfate	Xenobiotics	Benzoate Metabolism	1.20986	0.826, 1.594	1e-06	0.000142
100009042	5-hydroxyindole sulfate	Amino Acid	Tryptophan Metabolism	1.94094	1.299, 2.582	1e-06	0.00023
100004542	2-aminoheptanoate	Lipid	Fatty Acid, Amino	0.503828	0.331, 0.677	2e-06	0.000354
1869	2-hydroxyhippurate (salicylurate)	Xenobiotics	Benzoate Metabolism	1.17026	0.756, 1.584	4e-06	0.000508
100001767	pyrraline	Xenobiotics	Food Component/Plant	-1.78648	-2.426, -1.147	4e-06	0.000541
100001423	4-hydroxyhippurate	Xenobiotics	Benzoate Metabolism	0.710183	0.438, 0.982	1.2e-05	0.001209
100015832	behenoylcarnitine (C22)*	Lipid	Fatty Acid Metabolism (Acyl Carnitine, Long Chain Saturated)	-0.357687	-0.494, -0.221	1.1e-05	0.001209
100015965	ethyl alpha-glucopyranoside	Xenobiotics	Food Component/Plant	-1.91675	-2.679, -1.154	2e-05	0.001877
100002204	N-acetyl-3-methylhistidine*	Amino Acid	Histidine Metabolism	-1.36099	-1.921, -0.801	3.1e-05	0.002721
100000042	3-methylhistidine	Amino Acid	Histidine Metabolism	-1.6531	-2.345, -0.961	4e-05	0.003186
1143	butyrate/isobutyrate (4:0)	Lipid	Short Chain Fatty Acid	0.840005	0.477, 1.203	5.9e-05	0.004448
466	phytanate	Xenobiotics	Food Component/Plant	-0.57009	-0.822, -0.318	7.9e-05	0.005555
100001597	tiglylcarnitine (C5:1-DC)	Amino Acid	Leucine, Isoleucine and Valine Metabolism	-0.352965	-0.51, -0.196	8.5e-05	0.005615
100006376	3-methoxycatechol sulfate (2)	Xenobiotics	Benzoate Metabolism	1.50786	0.833, 2.183	9.3e-05	0.005809
100006115	arabonate/xylonate	Carbohydrate	Pentose Metabolism	-0.377688	-0.548, -0.207	0.000103	0.006114
100022517	1-oleyl-GPC (O-18:1)*	Lipid	Lysoplasmalogen	0.215645	0.118, 0.314	0.000114	0.006412
100021839	2-methoxyhydroquinone sulfate (1)	Xenobiotics	Benzoate Metabolism	1.94411	1.004, 2.884	0.000231	0.012408
100001550	homostachydrine*	Xenobiotics	Food Component/Plant	-0.414778	-0.619, -0.211	0.000284	0.014525
1342	3-methoxytyrosine	Amino Acid	Tyrosine Metabolism	0.159243	0.078, 0.241	0.000421	0.020615
100001567	1-palmitoyl-GPE (16:0)	Lipid	Lysophospholipid	0.236489	0.114, 0.359	0.000493	0.023142
100001226	I-urobilinogen	Cofactors and Vitamins	Hemoglobin and Porphyrin Metabolism	1.54489	0.738, 2.351	0.000532	0.024001
100006262	4-methoxyphenol sulfate	Amino Acid	Tyrosine Metabolism	1.5431	0.721, 2.365	0.000655	0.028393
100001989	glycocholenate sulfate*	Lipid	Secondary Bile Acid Metabolism	0.622277	0.281, 0.964	0.000886	0.036996
100020519	(2,4 or 2,5)-dimethylphenol sulfate	Xenobiotics	Food Component/Plant	-1.03746	-1.623, -0.452	0.001158	0.040797
100009337	caffeic acid sulfate	Xenobiotics	Food Component/Plant	0.894767	0.39, 1.399	0.001142	0.040797
100001859	chiro-inositol	Lipid	Inositol Metabolism	-0.274741	-0.429, -0.12	0.001129	0.040797
100001026	galactonate	Carbohydrate	Fructose, Mannose and Galactose Metabolism	-0.793526	-1.241, -0.346	0.001153	0.040797
100006679	phenol glucuronide	Amino Acid	Tyrosine Metabolism	0.935446	0.412, 1.459	0.001059	0.040797
100005352	1-eicosenoyl-GPC (20:1)*	Lipid	Lysophospholipid	0.230253	0.099, 0.361	0.001233	0.042114
100021467	pentose acid*	Partially Characterized Molecules	Partially Characterized Molecules	-0.479145	-0.758, -0.201	0.001509	0.05003
100000611	1-palmityl-GPC (O-16:0)	Lipid	Lysoplasmalogen	0.220706	0.092, 0.35	0.001609	0.051812
100006116	methyl-4-hydroxybenzoate sulfate	Xenobiotics	Benzoate Metabolism	-1.45325	-2.311, -0.595	0.001739	0.054452
100021012	5-hydroxymethyl-2-furoylcarnitine*	Xenobiotics	Food Component/Plant	-0.714361	-1.148, -0.281	0.002227	0.067843
100002910	1-methyl-5-imidazoleacetate	Amino Acid	Histidine Metabolism	-1.96145	-3.166, -0.757	0.002455	0.072805
100002284	2S,3R-dihydroxybutyrate	Lipid	Fatty Acid, Dihydroxy	-0.26586	-0.43, -0.102	0.002571	0.074284
100004634	3-methoxytyramine sulfate	Amino Acid	Tyrosine Metabolism	-0.510562	-0.831, -0.19	0.002924	0.080365
100001756	4-ethylphenylsulfate	Xenobiotics	Benzoate Metabolism	-0.776481	-1.262, -0.291	0.002853	0.080365
100000841	oxalate (ethanedioate)	Cofactors and Vitamins	Ascorbate and Aldarate Metabolism	-0.175492	-0.286, -0.065	0.003026	0.081188
100001990	taurocholenate sulfate*	Lipid	Secondary Bile Acid Metabolism	1.16091	0.427, 1.895	0.003121	0.081809
100021840	2-methoxyhydroquinone sulfate (2)	Xenobiotics	Benzoate Metabolism	1.17536	0.422, 1.929	0.003498	0.087596
100015744	ceramide (d18:2/24:1, d18:1/24:2)*	Lipid	Ceramides	0.123307	0.044, 0.202	0.003449	0.087596
100020743	1-nonadecenoyl-GPC (19:1)*	Lipid	Lysophospholipid	0.358855	0.127, 0.59	0.003664	0.089768
100006260	6-hydroxyindole sulfate	Xenobiotics	Chemical	0.523177	0.178, 0.868	0.004356	0.104067
100003185	leucylglycine	Peptide	Dipeptide	0.711025	0.241, 1.181	0.004432	0.104067
100003169	isoleucylglycine	Peptide	Dipeptide	0.415114	0.139, 0.691	0.004634	0.106592
100001510	phenol sulfate	Amino Acid	Tyrosine Metabolism	0.537445	0.179, 0.896	0.004793	0.108034
100003892	lanthionine	Amino Acid	Methionine, Cysteine, SAM and Taurine Metabolism	0.607603	0.197, 1.018	0.005277	0.116615
100005389	ferulic acid 4-sulfate	Xenobiotics	Food Component/Plant	0.976195	0.31, 1.643	0.005684	0.116774
339	glutarate (C5-DC)	Lipid	Fatty Acid, Dicarboxylate	0.29559	0.094, 0.497	0.005649	0.116774
340	glycine	Amino Acid	Glycine, Serine and Threonine Metabolism	0.080336	0.025, 0.135	0.005699	0.116774
100010941	linoleoyl-linoleoyl-glycerol (18:2/18:2) [1]*	Lipid	Diacylglycerol	0.312982	0.099, 0.527	0.005687	0.116774
100004182	3beta-hydroxy-5-cholenoate	Lipid	Secondary Bile Acid Metabolism	0.637553	0.196, 1.079	0.006261	0.124213
100015834	lignoceroylcarnitine (C24)*	Lipid	Fatty Acid Metabolism (Acyl Carnitine, Long Chain Saturated)	-0.113924	-0.193, -0.035	0.006521	0.124213
100003695	mannonate*	Xenobiotics	Food Component/Plant	-0.089486	-0.152, -0.027	0.006613	0.124213
100001086	N-(2-furoyl)glycine	Xenobiotics	Food Component/Plant	-0.637694	-1.08, -0.195	0.006354	0.124213
100021472	N-succinyl-phenylalanine	Amino Acid	Phenylalanine Metabolism	0.558338	0.171, 0.946	0.00642	0.124213
136	cholate	Lipid	Primary Bile Acid Metabolism	1.07132	0.321, 1.822	0.00682	0.126002
100015966	carotene diol (1)	Cofactors and Vitamins	Vitamin A Metabolism	-0.152421	-0.261, -0.044	0.007501	0.130055
803	mannose	Carbohydrate	Fructose, Mannose and Galactose Metabolism	-0.138107	-0.236, -0.04	0.007395	0.130055
100002183	S-methylmethionine	Amino Acid	Methionine, Cysteine, SAM and Taurine Metabolism	-1.29244	-2.209, -0.376	0.00744	0.130055
100020497	sulfate of piperine metabolite C16H19NO3 (3)*	Xenobiotics	Food Component/Plant	-0.64092	-1.093, -0.188	0.00722	0.130055
100002026	androstenediol (3alpha, 17alpha) monosulfate (2)	Lipid	Androgenic Steroids	-0.309439	-0.533, -0.086	0.008504	0.145221
100003151	linoleoylcarnitine (C18:2)*	Lipid	Fatty Acid Metabolism (Acyl Carnitine, Polyunsaturated)	0.146921	0.039, 0.255	0.009401	0.158141
100002015	5alpha-pregnan-diol disulfate	Lipid	Progestin Steroids	1.08708	0.277, 1.897	0.010416	0.172623
100004523	N-delta-acetylornithine	Amino Acid	Urea cycle; Arginine and Proline Metabolism	-0.500089	-0.874, -0.127	0.01058	0.172802
888	caprate (10:0)	Lipid	Medium Chain Fatty Acid	-0.169189	-0.296, -0.042	0.01106	0.178067
100019968	lyxonate	Carbohydrate	Pentose Metabolism	-0.358865	-0.635, -0.083	0.012836	0.203742
207	adenosine 3',5'-cyclic monophosphate (cAMP)	Nucleotide	Purine Metabolism, Adenine containing	0.561593	0.127, 0.996	0.013228	0.207035
100001022	threonate	Cofactors and Vitamins	Ascorbate and Aldarate Metabolism	-0.155296	-0.276, -0.035	0.01341	0.207035
100001925	cyclo(leu-pro)	Peptide	Dipeptide	-0.659016	-1.171, -0.147	0.013594	0.20704
111	3-hydroxyisobutyrate	Amino Acid	Leucine, Isoleucine and Valine Metabolism	-0.428252	-0.764, -0.093	0.014223	0.213727
100002417	2,3-dihydroxyisovalerate	Xenobiotics	Food Component/Plant	-0.880825	-1.58, -0.181	0.01549	0.224629
100000551	4-methyl-2-oxopentanoate	Amino Acid	Leucine, Isoleucine and Valine Metabolism	0.132164	0.027, 0.237	0.015746	0.224629
100002952	docosadioate (C22-DC)	Lipid	Fatty Acid, Dicarboxylate	0.689165	0.142, 1.236	0.015469	0.224629
100009038	myristoyl dihydrosphingomyelin (d18:0/14:0)*	Lipid	Dihydrosphingomyelins	-0.134807	-0.242, -0.028	0.015612	0.224629
100021478	1-methyl-5-imidazolelactate	Amino Acid	Histidine Metabolism	-0.788392	-1.425, -0.152	0.017105	0.237784
100009328	furaneol sulfate	Xenobiotics	Food Component/Plant	-0.460387	-0.834, -0.087	0.017512	0.237784
2051	methylsuccinate	Amino Acid	Leucine, Isoleucine and Valine Metabolism	0.222952	0.042, 0.404	0.017509	0.237784
100004056	N-methyltaurine	Amino Acid	Methionine, Cysteine, SAM and Taurine Metabolism	-0.770634	-1.395, -0.146	0.017492	0.237784
381	2-aminoadipate	Amino Acid	Lysine Metabolism	-0.29242	-0.53, -0.055	0.017791	0.238699
100001461	1-stearoyl-GPE (18:0)	Lipid	Lysophospholipid	0.153817	0.028, 0.279	0.018096	0.239337
100001129	O-acetylhomoserine	Amino Acid	Glycine, Serine and Threonine Metabolism	-0.515189	-0.936, -0.094	0.018264	0.239337
100002544	4-hydroxyglutamate	Amino Acid	Glutamate Metabolism	-0.443763	-0.808, -0.079	0.018856	0.244259
100009184	1-stearoyl-2-dihomo-linolenoyl-GPI (18:0/20:3n3 or 6)*	Lipid	Phosphatidylinositol (PI)	0.122676	0.022, 0.224	0.019212	0.246044
100001569	1-oleoyl-GPE (18:1)	Lipid	Lysophospholipid	0.199923	0.034, 0.366	0.020164	0.24764
100019966	3-hydroxyoleate*	Lipid	Fatty Acid, Monohydroxy	-0.271986	-0.497, -0.047	0.019685	0.24764
100001300	alpha-hydroxyisovalerate	Amino Acid	Leucine, Isoleucine and Valine Metabolism	-0.134651	-0.246, -0.023	0.019783	0.24764
100001617	undecanedioate (C11-DC)	Lipid	Fatty Acid, Dicarboxylate	0.197855	0.033, 0.362	0.020216	0.24764
100001609	7alpha-hydroxy-3-oxo-4-cholestenoate (7-Hoca)	Lipid	Sterol	0.214355	0.035, 0.394	0.021043	0.249641
100001294	gamma-glutamylglycine	Peptide	Gamma-glutamyl Amino Acid	0.14574	0.024, 0.268	0.020912	0.249641
100001613	tetradecanedioate (C14-DC)	Lipid	Fatty Acid, Dicarboxylate	0.69532	0.114, 1.276	0.020794	0.249641
100000665	docosahexaenoate (DHA; 22:6n3)	Lipid	Long Chain Polyunsaturated Fatty Acid (n3 and n6)	-0.256372	-0.472, -0.041	0.021447	0.251776
100001386	heme	Cofactors and Vitamins	Hemoglobin and Porphyrin Metabolism	-0.551185	-1.015, -0.087	0.02169	0.252008
100001570	1-linoleoyl-GPE (18:2)*	Lipid	Lysophospholipid	0.193088	0.03, 0.356	0.022103	0.254185
100001662	deoxycarnitine	Lipid	Carnitine Metabolism	-0.101173	-0.187, -0.015	0.022554	0.256749
1528	1-palmitoyl-2-linoleoyl-GPI (16:0/18:2)	Lipid	Phosphatidylinositol (PI)	0.144696	0.021, 0.268	0.023112	0.260472
100004112	3-methyl catechol sulfate (1)	Xenobiotics	Benzoate Metabolism	-0.938882	-1.746, -0.132	0.02422	0.27026
1052	glycerate	Carbohydrate	Glycolysis, Gluconeogenesis, and Pyruvate Metabolism	-0.056188	-0.105, -0.008	0.025111	0.277449
893	arachidate (20:0)	Lipid	Long Chain Saturated Fatty Acid	-0.354461	-0.663, -0.046	0.025981	0.278865
100005373	fructosyllysine	Amino Acid	Lysine Metabolism	-0.178496	-0.334, -0.023	0.02567	0.278865
100020208	perfluorooctanoate (PFOA)	Xenobiotics	Chemical	-0.119756	-0.224, -0.016	0.025896	0.278865
100001334	N-acetylproline	Amino Acid	Urea cycle; Arginine and Proline Metabolism	-0.683509	-1.287, -0.08	0.027933	0.296986
100008989	1-palmitoyl-2-eicosapentaenoyl-GPC (16:0/20:5)*	Lipid	Phosphatidylcholine (PC)	-0.15903	-0.301, -0.017	0.029447	0.298978
1125	5,6-dihydrouracil	Nucleotide	Pyrimidine Metabolism, Uracil containing	0.339019	0.038, 0.64	0.028557	0.298978
100001502	gamma-glutamyl-2-aminobutyrate	Peptide	Gamma-glutamyl Amino Acid	-0.306582	-0.579, -0.034	0.028834	0.298978
100020823	lithocholate sulfate (1)	Lipid	Secondary Bile Acid Metabolism	0.870224	0.096, 1.644	0.028939	0.298978
100006256	syringol sulfate	Xenobiotics	Food Component/Plant	-0.135451	-0.256, -0.015	0.029388	0.298978
197	S-adenosylhomocysteine (SAH)	Amino Acid	Methionine, Cysteine, SAM and Taurine Metabolism	0.193437	0.02, 0.367	0.030082	0.3027
100000936	3-methyl-2-oxobutyrate	Amino Acid	Leucine, Isoleucine and Valine Metabolism	0.105019	0.01, 0.2	0.031066	0.308036
100000008	benzoate	Xenobiotics	Benzoate Metabolism	0.225747	0.022, 0.429	0.031159	0.308036
100004541	acisoga	Amino Acid	Polyamine Metabolism	0.21761	0.021, 0.415	0.031587	0.308618
849	caffeine	Xenobiotics	Xanthine Metabolism	-0.832929	-1.588, -0.078	0.031766	0.308618
100004295	2-piperidinone	Xenobiotics	Food Component/Plant	0.760353	0.07, 1.451	0.032168	0.309859
2050	eicosapentaenoate (EPA; 20:5n3)	Lipid	Long Chain Polyunsaturated Fatty Acid (n3 and n6)	-0.30837	-0.591, -0.026	0.033387	0.318877
100002344	(12 or 13)-methylmyristate (a15:0 or i15:0)	Lipid	Fatty Acid, Branched	-0.297504	-0.57, -0.025	0.033759	0.319722
100009153	1-stearoyl-2-meadoyl-GPC (18:0/20:3n9)*	Lipid	Phosphatidylcholine (PC)	-0.189479	-0.364, -0.015	0.034496	0.320365
100006619	4-hydroxyphenylacetoylcarnitine	Amino Acid	Tyrosine Metabolism	0.391822	0.031, 0.752	0.034272	0.320365
100019982	octadecadienedioate (C18:2-DC)*	Lipid	Fatty Acid, Dicarboxylate	0.437973	0.034, 0.842	0.03468	0.320365
344	guanidinoacetate	Amino Acid	Creatine Metabolism	0.083887	0.006, 0.162	0.035216	0.322668
100020824	lithocholic acid sulfate (2)	Lipid	Secondary Bile Acid Metabolism	0.653255	0.047, 1.26	0.035803	0.32404
100001740	mannitol/sorbitol	Carbohydrate	Fructose, Mannose and Galactose Metabolism	-0.575844	-1.111, -0.041	0.035941	0.32404
100003397	trimethylamine N-oxide	Lipid	Phospholipid Metabolism	0.321466	0.021, 0.621	0.036651	0.327821
100010952	1-stearoyl-2-docosapentaenoyl-GPI (18:0/22:5n3)*	Lipid	Phosphatidylinositol (PI)	0.12526	0.008, 0.243	0.037571	0.328815
112	3-hydroxy-3-methylglutarate	Lipid	Mevalonate Metabolism	-0.143627	-0.279, -0.008	0.038091	0.328815
100000007	carnitine	Lipid	Carnitine Metabolism	-0.200959	-0.389, -0.013	0.037188	0.328815
273	cortisone	Lipid	Corticosteroids	-0.212384	-0.412, -0.012	0.038221	0.328815
100001580	docosapentaenoate (n6 DPA; 22:5n6)	Lipid	Long Chain Polyunsaturated Fatty Acid (n3 and n6)	-0.348345	-0.676, -0.021	0.037816	0.328815
100002060	1-docosahexaenoyl-GPE (22:6)*	Lipid	Lysophospholipid	0.111332	0.006, 0.217	0.039467	0.335134
100008998	gamma-tocopherol/beta-tocopherol	Cofactors and Vitamins	Tocopherol Metabolism	-0.169282	-0.33, -0.009	0.03955	0.335134
100000447	gentisate	Amino Acid	Tyrosine Metabolism	0.528413	0.024, 1.033	0.040725	0.342513
100015727	ceramide (d16:1/24:1, d18:1/22:1)*	Lipid	Ceramides	0.244417	0.011, 0.478	0.041031	0.342534
100001272	1-oleoyl-GPC (18:1)	Lipid	Lysophospholipid	0.094447	0.004, 0.185	0.041591	0.344505
100001809	2-ethylphenylsulfate	Xenobiotics	Benzoate Metabolism	-0.43572	-0.856, -0.016	0.042511	0.344505
100008928	2-hydroxybutyrate/2-hydroxyisobutyrate	Amino Acid	Glutathione Metabolism	-0.172897	-0.34, -0.006	0.043364	0.344505
100020378	2-hydroxysebacate	Lipid	Fatty Acid, Dicarboxylate	0.487285	0.018, 0.956	0.042299	0.344505
100020409	ascorbic acid 3-sulfate*	Cofactors and Vitamins	Ascorbate and Aldarate Metabolism	-0.096315	-0.189, -0.003	0.043195	0.344505
100000453	paraxanthine	Xenobiotics	Xanthine Metabolism	-0.827412	-1.625, -0.03	0.042484	0.344505
100009364	phosphatidylcholine (18:0/20:2, 20:0/18:2)*	Lipid	Phosphatidylcholine (PC)	-0.106821	-0.21, -0.003	0.043407	0.344505
100001999	21-hydroxypregnenolone disulfate	Lipid	Pregnenolone Steroids	0.486254	0.012, 0.96	0.044788	0.350797
100019972	dodecenedioate (C12:1-DC)*	Lipid	Fatty Acid, Dicarboxylate	0.451043	0.011, 0.892	0.045134	0.350797
100015962	N,N,N-trimethyl-5-aminovalerate	Amino Acid	Lysine Metabolism	-0.068549	-0.135, -0.002	0.044995	0.350797
100009147	1-stearyl-GPC (O-18:0)*	Lipid	Lysoplasmalogen	0.253432	0.005, 0.502	0.045839	0.35363
241	phenylpyruvate	Amino Acid	Phenylalanine Metabolism	0.26869	0.005, 0.532	0.046126	0.35363
100001765	3-methyladipate	Lipid	Fatty Acid, Dicarboxylate	0.245471	0.004, 0.487	0.046631	0.355091
100002876	1-(1-enyl-oleoyl)-GPC (P-18:1)*	Lipid	Lysoplasmalogen	0.14103	0.001, 0.281	0.049044	0.357863
100001106	1,3-dimethylurate	Xenobiotics	Xanthine Metabolism	-0.49079	-0.979, -0.003	0.04883	0.357863
100001149	3-methylcrotonylglycine	Amino Acid	Leucine, Isoleucine and Valine Metabolism	0.322505	0.002, 0.643	0.048978	0.357863
100002017	5alpha-androstan-3alpha,17beta-diol disulfate	Lipid	Androgenic Steroids	0.907708	0.008, 1.807	0.048108	0.357863
100001411	beta-guanidinopropanoate	Xenobiotics	Food Component/Plant	-0.387854	-0.771, -0.004	0.047695	0.357863
100015623	lactosyl-N-behenoyl-sphingosine (d18:1/22:0)*	Lipid	Lactosylceramides (LCER)	0.14546	0.001, 0.29	0.049218	0.357863
100006129	vanillactate	Amino Acid	Tyrosine Metabolism	0.467072	0.002, 0.932	0.049101	0.357863
100022484	N-lactoyl tyrosine	Amino Acid	Lactoyl Amino Acid	-0.32469	-0.65, 0.0	0.050132	0.359866
100021131	undecenoylcarnitine (C11:1)	Lipid	Fatty Acid Metabolism (Acyl Carnitine, Monounsaturated)	-0.221797	-0.443, -0.0	0.049901	0.359866
100009009	1-(1-enyl-palmitoyl)-2-linoleoyl-GPC (P-16:0/18:2)*	Lipid	Plasmalogen	-0.115939	-0.234, 0.002	0.05326	0.363402
100005402	11-ketoetiocholanolone glucuronide	Lipid	Androgenic Steroids	-0.494043	-0.999, 0.011	0.054932	0.363402
100001571	1-arachidonoyl-GPE (20:4n6)*	Lipid	Lysophospholipid	0.089012	-0.002, 0.18	0.054497	0.363402
100001566	1-docosahexaenoyl-GPC (22:6)*	Lipid	Lysophospholipid	0.131163	-0.001, 0.263	0.051401	0.363402
100009139	1-myristoyl-2-arachidonoyl-GPC (14:0/20:4)*	Lipid	Phosphatidylcholine (PC)	-0.165718	-0.333, 0.001	0.051784	0.363402
100001462	1-stearoyl-GPG (18:0)	Lipid	Lysophospholipid	0.387978	-0.005, 0.781	0.052537	0.363402
100002470	2-arachidonoyl-GPI (20:4)*	Lipid	Lysophospholipid	0.382809	-0.01, 0.776	0.05592	0.363402
100001579	2-hydroxypalmitate	Lipid	Fatty Acid, Monohydroxy	-0.1432	-0.289, 0.002	0.053559	0.363402
100020973	5-hydroxy-2-methylpyridine sulfate	Xenobiotics	Chemical	-0.554638	-1.123, 0.014	0.055326	0.363402
1105	alpha-tocopherol	Cofactors and Vitamins	Tocopherol Metabolism	0.141839	-0.001, 0.285	0.051881	0.363402
100020272	dihydroferulic acid sulfate	Xenobiotics	Food Component/Plant	0.770039	-0.02, 1.56	0.055781	0.363402
100001198	myristoleate (14:1n5)	Lipid	Long Chain Monounsaturated Fatty Acid	-0.358146	-0.723, 0.007	0.054022	0.363402
100001469	N1-methyl-4-pyridone-3-carboxamide	Cofactors and Vitamins	Nicotinate and Nicotinamide Metabolism	0.35667	-0.007, 0.721	0.054381	0.363402
100001806	o-cresol sulfate	Xenobiotics	Benzoate Metabolism	-0.566199	-1.146, 0.014	0.055256	0.363402
100021103	pregnenetriol sulfate*	Lipid	Pregnenolone Steroids	0.372937	-0.005, 0.75	0.05267	0.363402
100001948	succinylcarnitine (C4-DC)	Energy	TCA Cycle	0.167532	-0.005, 0.34	0.056106	0.363402
1094	thyroxine	Amino Acid	Tyrosine Metabolism	-0.072073	-0.146, 0.002	0.055233	0.363402
100004299	N-acetyl-1-methylhistidine*	Amino Acid	Histidine Metabolism	-0.339606	-0.689, 0.01	0.056498	0.363845
100006369	N-carbamoylalanine	Amino Acid	Alanine and Aspartate Metabolism	-0.330178	-0.671, 0.011	0.057327	0.367089
100015593	1-stearoyl-2-docosapentaenoyl-GPE (18:0/22:5n6)*	Lipid	Phosphatidylethanolamine (PE)	-0.173468	-0.353, 0.006	0.057688	0.367313
100006203	acesulfame	Xenobiotics	Food Component/Plant	-0.348641	-0.71, 0.013	0.058087	0.367779
100001624	3-(3-hydroxyphenyl)propionate	Xenobiotics	Benzoate Metabolism	1.19309	-0.05, 2.436	0.059223	0.371395
100005818	N-acetyl-S-allyl-cysteine	Xenobiotics	Food Component/Plant	-0.06877	-0.14, 0.003	0.059318	0.371395
100009002	1-(1-enyl-palmitoyl)-2-arachidonoyl-GPE (P-16:0/20:4)*	Lipid	Plasmalogen	-0.18213	-0.373, 0.009	0.061088	0.380367
100001197	10-undecenoate (11:1n1)	Lipid	Medium Chain Fatty Acid	-0.225113	-0.463, 0.013	0.062685	0.381999
100000467	3-indoxyl sulfate	Amino Acid	Tryptophan Metabolism	0.258468	-0.015, 0.531	0.062553	0.381999
100001586	gulonate*	Cofactors and Vitamins	Ascorbate and Aldarate Metabolism	-0.13466	-0.277, 0.007	0.062123	0.381999
100001229	stearidonate (18:4n3)	Lipid	Long Chain Polyunsaturated Fatty Acid (n3 and n6)	-0.245007	-0.504, 0.014	0.062706	0.381999
100020851	3-ethylcatechol sulfate (1)	Xenobiotics	Food Component/Plant	-0.615432	-1.267, 0.036	0.06305	0.382031
100015632	N-stearoyl-sphingadienine (d18:2/18:0)*	Lipid	Ceramides	0.244568	-0.015, 0.504	0.063507	0.382741
100001651	2-oleoyl-GPE (18:1)*	Lipid	Lysophospholipid	0.535079	-0.036, 1.106	0.064965	0.385151
100002027	androstenediol (3alpha, 17alpha) monosulfate (3)	Lipid	Androgenic Steroids	-0.177777	-0.368, 0.012	0.065138	0.385151
229	arachidonate (20:4n6)	Lipid	Long Chain Polyunsaturated Fatty Acid (n3 and n6)	-0.190132	-0.393, 0.013	0.065274	0.385151
100022006	bilirubin degradation product, C17H18N2O4 (2)**	Partially Characterized Molecules	Partially Characterized Molecules	0.675762	-0.045, 1.396	0.064876	0.385151
1488	arachidonoyl ethanolamide	Lipid	Endocannabinoid	-0.2219	-0.459, 0.015	0.06564	0.385293
100001083	indolepropionate	Amino Acid	Tryptophan Metabolism	-0.445952	-0.923, 0.032	0.065993	0.385357
100004227	2-aminooctanoate	Lipid	Fatty Acid, Amino	0.20418	-0.016, 0.424	0.067523	0.389177
100000011	phenylacetate	Amino Acid	Phenylalanine Metabolism	0.414894	-0.032, 0.862	0.067602	0.389177
100001757	thymol sulfate	Xenobiotics	Food Component/Plant	-1.09371	-2.273, 0.085	0.067683	0.389177
100002868	1-behenoyl-GPC (22:0)	Lipid	Lysophospholipid	0.221987	-0.018, 0.462	0.068844	0.392016
100009227	1-linoleoyl-GPG (18:2)*	Lipid	Lysophospholipid	0.175857	-0.015, 0.366	0.068872	0.392016
100008904	1-stearoyl-2-oleoyl-GPC (18:0/18:1)	Lipid	Phosphatidylcholine (PC)	-0.124122	-0.259, 0.01	0.069232	0.392081
100021105	eicosenedioate (C20:1-DC)*	Lipid	Fatty Acid, Dicarboxylate	0.615084	-0.054, 1.284	0.070152	0.392433
1137	oleoyl ethanolamide	Lipid	Endocannabinoid	-0.412373	-0.861, 0.036	0.069913	0.392433
100003674	prolylglycine	Peptide	Dipeptide	0.323041	-0.029, 0.675	0.070338	0.392433
100001211	sebacate (C10-DC)	Lipid	Fatty Acid, Dicarboxylate	0.409146	-0.037, 0.855	0.070712	0.392575
100020487	N-acetyl-isoputreanine	Amino Acid	Polyamine Metabolism	0.119634	-0.011, 0.25	0.07141	0.394507
100015840	dihomo-linolenoylcarnitine (C20:3n3 or 6)*	Lipid	Fatty Acid Metabolism (Acyl Carnitine, Polyunsaturated)	0.086441	-0.008, 0.181	0.07188	0.394553
100001577	N-acetylcitrulline	Amino Acid	Urea cycle; Arginine and Proline Metabolism	-0.354599	-0.743, 0.034	0.072119	0.394553
100001400	1-methylurate	Xenobiotics	Xanthine Metabolism	-0.445284	-0.937, 0.046	0.074091	0.401444
100006125	vanillic alcohol sulfate	Amino Acid	Tyrosine Metabolism	0.66277	-0.069, 1.394	0.073947	0.401444
100001987	5alpha-androstan-3beta,17beta-diol disulfate	Lipid	Androgenic Steroids	0.373318	-0.04, 0.787	0.074765	0.401863
100001162	propionylcarnitine (C3)	Lipid	Fatty Acid Metabolism (also BCAA Metabolism)	-0.117159	-0.247, 0.013	0.074881	0.401863
100001658	taurolithocholate 3-sulfate	Lipid	Secondary Bile Acid Metabolism	-0.768634	-1.626, 0.089	0.07691	0.410793
100002927	S-methylcysteine sulfoxide	Amino Acid	Methionine, Cysteine, SAM and Taurine Metabolism	-0.266312	-0.564, 0.032	0.077603	0.412541
100001562	2-palmitoyl-GPC (16:0)*	Lipid	Lysophospholipid	0.147516	-0.018, 0.313	0.078524	0.415475
100000269	glycerophosphorylcholine (GPC)	Lipid	Phospholipid Metabolism	0.115618	-0.015, 0.246	0.07942	0.418255
144	4-hydroxyphenylacetate	Amino Acid	Phenylalanine Metabolism	0.180562	-0.023, 0.385	0.080392	0.421401
100001405	1-methylxanthine	Xenobiotics	Xanthine Metabolism	-0.815428	-1.739, 0.109	0.081321	0.421561
100001596	2-methylmalonylcarnitine (C4-DC)	Lipid	Fatty Acid Metabolism (also BCAA Metabolism)	0.224201	-0.029, 0.478	0.08083	0.421561
100001310	nicotinamide riboside	Cofactors and Vitamins	Nicotinate and Nicotinamide Metabolism	-0.47316	-1.01, 0.063	0.081544	0.421561
100001611	3beta,7alpha-dihydroxy-5-cholestenoate	Lipid	Sterol	1.08411	-0.155, 2.323	0.083837	0.426161
100002007	5alpha-androstan-3alpha,17alpha-diol disulfate	Lipid	Androgenic Steroids	0.143638	-0.021, 0.308	0.083947	0.426161
1025	pipecolate	Amino Acid	Lysine Metabolism	-0.189534	-0.406, 0.027	0.083497	0.426161
100002106	sphingomyelin (d18:1/18:1, d18:2/18:0)	Lipid	Sphingomyelins	0.11734	-0.017, 0.251	0.083709	0.426161
100016019	1-palmitoyl-2-pentadecanoyl-GPC (16:0/15:0)*	Lipid	Phosphatidylcholine (PC)	-0.093877	-0.202, 0.014	0.085297	0.428035
100020004	3-carboxy-4-methyl-5-pentyl-2-furanpropionate (3-CMPFP)**	Lipid	Fatty Acid, Dicarboxylate	0.180428	-0.027, 0.388	0.086215	0.428035
100021760	N-acetyl-2-aminoadipate	Amino Acid	Lysine Metabolism	0.169747	-0.025, 0.365	0.085519	0.428035
980	pentadecanoate (15:0)	Lipid	Long Chain Saturated Fatty Acid	-0.19926	-0.428, 0.03	0.085667	0.428035
935	sucrose	Carbohydrate	Disaccharides and Oligosaccharides	0.717259	-0.109, 1.543	0.086074	0.428035
100001397	1,3,7-trimethylurate	Xenobiotics	Xanthine Metabolism	-0.608961	-1.312, 0.094	0.086679	0.428451
235	2-hydroxyphenylacetate	Amino Acid	Phenylalanine Metabolism	0.355283	-0.059, 0.769	0.08972	0.441546
100009209	1-palmitoyl-2-eicosapentaenoyl-GPE (16:0/20:5)*	Lipid	Phosphatidylethanolamine (PE)	-0.208311	-0.452, 0.035	0.090362	0.44185
100020276	sphingomyelin (d17:1/14:0, d16:1/15:0)*	Lipid	Sphingomyelins	-0.054369	-0.118, 0.009	0.090565	0.44185
100000265	kynurenine	Amino Acid	Tryptophan Metabolism	0.071959	-0.012, 0.156	0.091601	0.444977
100001776	2-linoleoyl-GPE (18:2)*	Lipid	Lysophospholipid	0.282859	-0.051, 0.617	0.093427	0.4519
100020211	3-hydroxybutyroylglycine**	Lipid	Fatty Acid Metabolism (Acyl Glycine)	0.353471	-0.066, 0.773	0.095455	0.455944
100010850	4-hydroxyphenylacetylglutamine	Peptide	Acetylated Peptides	0.3813	-0.072, 0.835	0.095882	0.455944
100001073	androsterone sulfate	Lipid	Androgenic Steroids	-0.169438	-0.37, 0.032	0.095073	0.455944
100001739	dihomo-linolenate (20:3n3 or n6)	Lipid	Long Chain Polyunsaturated Fatty Acid (n3 and n6)	-0.182083	-0.399, 0.034	0.095755	0.455944
100004601	1H-indole-7-acetic acid	Xenobiotics	Bacterial/Fungal	-0.338559	-0.742, 0.065	0.096501	0.456962
100005717	1-palmitoyl-GPG (16:0)*	Lipid	Lysophospholipid	0.141582	-0.028, 0.311	0.097724	0.457014
100022005	bilirubin degradation product, C17H18N2O4 (1)**	Partially Characterized Molecules	Partially Characterized Molecules	0.435153	-0.085, 0.956	0.097729	0.457014
100015785	nisinate (24:6n3)	Lipid	Long Chain Polyunsaturated Fatty Acid (n3 and n6)	-0.392531	-0.861, 0.076	0.097049	0.457014
100009005	1-(1-enyl-palmitoyl)-2-oleoyl-GPE (P-16:0/18:1)*	Lipid	Plasmalogen	-0.110723	-0.246, 0.025	0.105059	0.45745
100000672	1-myristoyl-2-palmitoyl-GPC (14:0/16:0)	Lipid	Phosphatidylcholine (PC)	-0.127735	-0.283, 0.027	0.102735	0.45745
100008980	1-stearoyl-2-linoleoyl-GPC (18:0/18:2)*	Lipid	Phosphatidylcholine (PC)	-0.088783	-0.196, 0.019	0.102058	0.45745
100002914	3-(4-hydroxyphenyl)propionate	Xenobiotics	Benzoate Metabolism	0.570846	-0.121, 1.262	0.101803	0.45745
314	behenate (22:0)*	Lipid	Long Chain Saturated Fatty Acid	0.273496	-0.057, 0.604	0.101311	0.45745
100022007	bilirubin degradation product, C17H18N2O4 (3)**	Partially Characterized Molecules	Partially Characterized Molecules	0.414787	-0.088, 0.918	0.102285	0.45745
100001606	cholesterol sulfate	Lipid	Sterol	-0.056116	-0.124, 0.012	0.101337	0.45745
100001181	docosapentaenoate (n3 DPA; 22:5n3)	Lipid	Long Chain Polyunsaturated Fatty Acid (n3 and n6)	-0.2302	-0.511, 0.051	0.104564	0.45745
100000846	erythritol	Xenobiotics	Food Component/Plant	-0.170775	-0.379, 0.038	0.104639	0.45745
100006271	ethylparaben sulfate	Xenobiotics	Chemical	-0.68209	-1.51, 0.146	0.102543	0.45745
100001614	hexadecanedioate (C16-DC)	Lipid	Fatty Acid, Dicarboxylate	0.358932	-0.076, 0.794	0.101877	0.45745
100001034	indoleacetate	Amino Acid	Tryptophan Metabolism	0.159392	-0.032, 0.351	0.098936	0.45745
519	myristate (14:0)	Lipid	Long Chain Saturated Fatty Acid	-0.230166	-0.512, 0.051	0.105128	0.45745
100020215	N-methylhydroxyproline**	Amino Acid	Urea cycle; Arginine and Proline Metabolism	-0.409269	-0.908, 0.09	0.103876	0.45745
100019978	octadecenedioate (C18:1-DC)	Lipid	Fatty Acid, Dicarboxylate	0.418019	-0.093, 0.929	0.104631	0.45745
100005996	octadecenedioylcarnitine (C18:1-DC)*	Lipid	Fatty Acid Metabolism (Acyl Carnitine, Dicarboxylate)	0.183729	-0.041, 0.408	0.104571	0.45745
100003588	phenylalanylglycine	Peptide	Dipeptide	0.253405	-0.051, 0.558	0.099574	0.45745
100005985	sphingomyelin (d18:2/14:0, d18:1/14:1)*	Lipid	Sphingomyelins	-0.046822	-0.104, 0.01	0.104229	0.45745
100020842	N,N-dimethyl-5-aminovalerate	Amino Acid	Lysine Metabolism	-0.477831	-1.065, 0.109	0.106373	0.461085
100002008	5alpha-androstan-3alpha,17alpha-diol monosulfate	Lipid	Androgenic Steroids	0.278208	-0.065, 0.621	0.107747	0.465251
100003472	(15:2)-anacardic acid	Xenobiotics	Food Component/Plant	0.214898	-0.051, 0.481	0.10924	0.467694
100009015	1-(1-enyl-stearoyl)-2-docosahexaenoyl-GPC (P-18:0/22:6)*	Lipid	Plasmalogen	0.053054	-0.013, 0.119	0.109451	0.467694
100020578	4-allylcatechol sulfate	Xenobiotics	Benzoate Metabolism	0.454033	-0.109, 1.017	0.109557	0.467694
100004321	2,8-quinolinediol sulfate	Xenobiotics	Food Component/Plant	-0.055302	-0.124, 0.014	0.111419	0.473844
100006430	arabitol/xylitol	Carbohydrate	Pentose Metabolism	-0.126694	-0.286, 0.032	0.113496	0.480865
1123	chenodeoxycholate	Lipid	Primary Bile Acid Metabolism	0.484365	-0.124, 1.093	0.113984	0.481126
100020360	8-methoxykynurenate	Amino Acid	Tryptophan Metabolism	0.202095	-0.052, 0.457	0.114813	0.482816
100002869	1-erucoyl-GPC (22:1)*	Lipid	Lysophospholipid	0.232059	-0.061, 0.525	0.115673	0.484621
100021210	urolithin B glucuronide	Xenobiotics	Bacterial/Fungal	-0.136395	-0.309, 0.036	0.116846	0.487723
100004575	N2,N5-diacetylornithine	Amino Acid	Urea cycle; Arginine and Proline Metabolism	-0.313983	-0.713, 0.085	0.117991	0.490684
100000656	1-stearoyl-GPI (18:0)	Lipid	Lysophospholipid	0.211009	-0.058, 0.48	0.119302	0.490705
100020975	3-hydroxy-2-methylpyridine sulfate	Xenobiotics	Chemical	-0.506665	-1.152, 0.138	0.118635	0.490705
1087	erucate (22:1n9)	Lipid	Long Chain Monounsaturated Fatty Acid	-0.282804	-0.643, 0.078	0.119125	0.490705
100020542	11beta-hydroxyetiocholanolone glucuronide*	Lipid	Androgenic Steroids	0.422778	-0.118, 0.964	0.120363	0.493268
100009122	1-pentadecanoyl-2-arachidonoyl-GPC (15:0/20:4)*	Lipid	Phosphatidylcholine (PC)	-0.080523	-0.184, 0.023	0.121748	0.497138
100009205	1-palmitoyl-2-stearoyl-GPE (16:0/18:0)*	Lipid	Phosphatidylethanolamine (PE)	0.260051	-0.076, 0.596	0.123717	0.49815
100001402	5-acetylamino-6-formylamino-3-methyluracil	Xenobiotics	Xanthine Metabolism	-0.514858	-1.178, 0.149	0.123059	0.49815
100006438	citraconate/glutaconate	Energy	TCA Cycle	-0.331668	-0.76, 0.097	0.123764	0.49815
100015640	N-palmitoylserine	Lipid	Endocannabinoid	0.393911	-0.114, 0.902	0.123285	0.49815
100021712	deoxycholic acid 12-sulfate*	Lipid	Secondary Bile Acid Metabolism	0.704029	-0.209, 1.617	0.125393	0.50291
100021711	decadienedioic acid (C10:2-DC)**	Lipid	Fatty Acid, Dicarboxylate	0.298738	-0.09, 0.687	0.126071	0.503836
100001618	1-myristoylglycerol (14:0)	Lipid	Monoacylglycerol	-0.170985	-0.396, 0.054	0.130025	0.510584
100000861	2,3-dihydroxypyridine	Xenobiotics	Food Component/Plant	-0.707225	-1.634, 0.219	0.128909	0.510584
100003258	2-O-methylascorbic acid	Cofactors and Vitamins	Ascorbate and Aldarate Metabolism	-0.116238	-0.269, 0.036	0.129395	0.510584
100000776	palmitoylcarnitine (C16)	Lipid	Fatty Acid Metabolism (Acyl Carnitine, Long Chain Saturated)	0.068671	-0.021, 0.159	0.129231	0.510584
480	proline	Amino Acid	Urea cycle; Arginine and Proline Metabolism	-0.092265	-0.213, 0.029	0.129573	0.510584
100002945	(14 or 15)-methylpalmitate (a17:0 or i17:0)	Lipid	Fatty Acid, Branched	-0.187452	-0.435, 0.06	0.131903	0.513172
100021162	palmitoyl-sphingosine-phosphoethanolamine (d18:1/16:0)	Lipid	Ceramide PEs	0.08051	-0.026, 0.187	0.131649	0.513172
100001167	pro-hydroxy-pro	Amino Acid	Urea cycle; Arginine and Proline Metabolism	0.18801	-0.06, 0.436	0.13205	0.513172
100009014	1-(1-enyl-palmitoyl)-2-arachidonoyl-GPC (P-16:0/20:4)*	Lipid	Plasmalogen	-0.098626	-0.23, 0.033	0.135198	0.514757
100015837	arachidonoylcarnitine (C20:4)	Lipid	Fatty Acid Metabolism (Acyl Carnitine, Polyunsaturated)	0.081862	-0.027, 0.191	0.134	0.514757
100001327	HWESASXX*	Peptide	Polypeptide	0.402389	-0.133, 0.938	0.134907	0.514757
405	lithocholate	Lipid	Secondary Bile Acid Metabolism	0.386975	-0.128, 0.902	0.134884	0.514757
533	urea	Amino Acid	Urea cycle; Arginine and Proline Metabolism	-0.123305	-0.287, 0.04	0.133892	0.514757
566	valine	Amino Acid	Leucine, Isoleucine and Valine Metabolism	-0.070778	-0.165, 0.023	0.13305	0.514757
100020504	sulfate of piperine metabolite C18H21NO3 (3)*	Xenobiotics	Food Component/Plant	0.498739	-0.167, 1.165	0.135926	0.515788
100001620	glycerophosphoethanolamine	Lipid	Phospholipid Metabolism	0.139101	-0.047, 0.325	0.137271	0.519143
561	glutamate	Amino Acid	Glutamate Metabolism	0.133637	-0.047, 0.314	0.139643	0.522848
342	glycocholate	Lipid	Primary Bile Acid Metabolism	0.424381	-0.148, 0.996	0.139582	0.522848
100002749	S-methylcysteine	Amino Acid	Methionine, Cysteine, SAM and Taurine Metabolism	-0.153611	-0.361, 0.053	0.139294	0.522848
100003000	1-(1-enyl-palmitoyl)-GPE (P-16:0)*	Lipid	Lysoplasmalogen	0.166977	-0.058, 0.392	0.140246	0.523367
1518	N-palmitoyl-sphingosine (d18:1/16:0)	Lipid	Ceramides	0.137916	-0.049, 0.325	0.141351	0.52575
100020781	1-nisinoyl-GPC (24:6)*	Lipid	Lysophospholipid	-0.190555	-0.449, 0.068	0.142365	0.526362
100001674	2-arachidonoyl-GPE (20:4)*	Lipid	Lysophospholipid	0.341257	-0.123, 0.806	0.143383	0.526362
100003429	equol sulfate	Xenobiotics	Food Component/Plant	-0.013493	-0.032, 0.005	0.143351	0.526362
100015787	sphingomyelin (d18:1/19:0, d19:1/18:0)*	Lipid	Sphingomyelins	-0.062806	-0.148, 0.023	0.142495	0.526362
100009225	1-(1-enyl-stearoyl)-2-linoleoyl-GPE (P-18:0/18:2)*	Lipid	Plasmalogen	-0.167937	-0.397, 0.061	0.144464	0.528606
100021502	(2 or 3)-decenoate (10:1n7 or n8)	Lipid	Medium Chain Fatty Acid	0.412697	-0.155, 0.98	0.147326	0.529089
100008994	1-stearoyl-2-linoleoyl-GPI (18:0/18:2)	Lipid	Phosphatidylinositol (PI)	0.073374	-0.027, 0.174	0.146413	0.529089
249	carnosine	Amino Acid	Histidine Metabolism	-0.317478	-0.755, 0.12	0.147882	0.529089
100009333	docosahexaenoylcholine	Lipid	Fatty Acid Metabolism (Acyl Choline)	0.255564	-0.095, 0.607	0.146768	0.529089
100006056	N-formylphenylalanine	Amino Acid	Tyrosine Metabolism	-0.25642	-0.607, 0.095	0.145545	0.529089
100005998	octadecanedioylcarnitine (C18-DC)*	Lipid	Fatty Acid Metabolism (Acyl Carnitine, Dicarboxylate)	0.107409	-0.04, 0.255	0.147537	0.529089
100001267	piperine	Xenobiotics	Food Component/Plant	-0.390223	-0.926, 0.146	0.146738	0.529089
100005376	1-eicosenoyl-GPE (20:1)*	Lipid	Lysophospholipid	0.980587	-0.382, 2.343	0.15144	0.540103
100001337	linolenate [alpha or gamma; (18:3n3 or 6)]	Lipid	Long Chain Polyunsaturated Fatty Acid (n3 and n6)	-0.250839	-0.601, 0.099	0.153142	0.544451
100001399	1,7-dimethylurate	Xenobiotics	Xanthine Metabolism	-0.522735	-1.258, 0.212	0.155926	0.545694
100001277	10-nonadecenoate (19:1n9)	Lipid	Long Chain Monounsaturated Fatty Acid	-0.206661	-0.499, 0.085	0.158169	0.545694
100002173	1-pentadecanoyl-GPC (15:0)*	Lipid	Lysophospholipid	0.083028	-0.034, 0.2	0.15743	0.545694
100020410	3-hydroxyhippurate sulfate	Xenobiotics	Benzoate Metabolism	0.753782	-0.306, 1.814	0.156153	0.545694
100006098	3-hydroxypyridine sulfate	Xenobiotics	Chemical	-0.374015	-0.904, 0.156	0.159302	0.545694
1218	acetoacetate	Lipid	Ketone Bodies	-0.350652	-0.845, 0.144	0.157015	0.545694
181	laurate (12:0)	Lipid	Medium Chain Fatty Acid	-0.179545	-0.434, 0.075	0.159064	0.545694
1104	methyl indole-3-acetate	Xenobiotics	Food Component/Plant	0.208783	-0.087, 0.504	0.158522	0.545694
100020204	N-acetyl-2-aminooctanoate*	Lipid	Fatty Acid, Amino	0.218055	-0.087, 0.524	0.154611	0.545694
100006620	nonanoylcarnitine (C9)	Lipid	Fatty Acid Metabolism (Acyl Carnitine, Medium Chain)	-0.165646	-0.399, 0.067	0.155961	0.545694
100006264	propyl 4-hydroxybenzoate sulfate	Xenobiotics	Benzoate Metabolism	-0.207506	-0.502, 0.087	0.159104	0.545694
100001092	trigonelline (N'-methylnicotinate)	Cofactors and Vitamins	Nicotinate and Nicotinamide Metabolism	0.305258	-0.126, 0.736	0.157484	0.545694
100009069	1-(1-enyl-palmitoyl)-2-linoleoyl-GPE (P-16:0/18:2)*	Lipid	Plasmalogen	-0.120715	-0.293, 0.052	0.162383	0.548263
100001445	1-palmitoyl-GPA (16:0)	Lipid	Lysophospholipid	0.319398	-0.137, 0.776	0.162541	0.548263
100015833	arachidoylcarnitine (C20)*	Lipid	Fatty Acid Metabolism (Acyl Carnitine, Long Chain Saturated)	-0.074981	-0.182, 0.032	0.16198	0.548263
100021252	ginkgolic acid C15:1	Xenobiotics	Food Component/Plant	-0.22526	-0.548, 0.097	0.163457	0.548263
100000765	levulinate (4-oxovalerate)	Xenobiotics	Food Component/Plant	0.193779	-0.084, 0.471	0.163232	0.548263
100001467	N2-methylguanosine	Nucleotide	Purine Metabolism, Guanine containing	0.329783	-0.141, 0.8	0.161774	0.548263
100001006	N-acetylglycine	Amino Acid	Glycine, Serine and Threonine Metabolism	0.193828	-0.082, 0.47	0.1608	0.548263
100020819	glycoursodeoxycholic acid sulfate (1)	Lipid	Secondary Bile Acid Metabolism	0.828644	-0.363, 2.021	0.165196	0.550818
922	N-stearoyl-sphinganine (d18:0/18:0)*	Lipid	Dihydroceramides	-0.150188	-0.366, 0.066	0.164752	0.550818
100009141	1-stearoyl-2-docosapentaenoyl-GPC (18:0/22:5n3)*	Lipid	Phosphatidylcholine (PC)	0.073973	-0.033, 0.181	0.167119	0.554579
100004396	3-hydroxyadipate	Lipid	Fatty Acid, Dicarboxylate	0.238025	-0.106, 0.582	0.167554	0.554579
100000096	4-guanidinobutanoate	Amino Acid	Guanidino and Acetamido Metabolism	-0.221278	-0.542, 0.099	0.167801	0.554579
100020541	11beta-hydroxyandrosterone glucuronide	Lipid	Androgenic Steroids	-0.175057	-0.432, 0.082	0.174203	0.559611
100020372	3-indoleglyoxylic acid	Xenobiotics	Food Component/Plant	0.176296	-0.081, 0.434	0.171435	0.559611
179	9,10-DiHOME	Lipid	Fatty Acid, Dihydroxy	0.14621	-0.067, 0.359	0.170467	0.559611
100003473	alliin	Xenobiotics	Food Component/Plant	-0.580749	-1.429, 0.268	0.171702	0.559611
100015839	dihomo-linoleoylcarnitine (C20:2)*	Lipid	Fatty Acid Metabolism (Acyl Carnitine, Polyunsaturated)	0.082622	-0.039, 0.204	0.173304	0.559611
100001657	glycolithocholate sulfate*	Lipid	Secondary Bile Acid Metabolism	0.917217	-0.418, 2.253	0.170211	0.559611
891	margarate (17:0)	Lipid	Long Chain Saturated Fatty Acid	-0.140791	-0.348, 0.066	0.174289	0.559611
363	myo-inositol	Lipid	Inositol Metabolism	-0.074953	-0.185, 0.035	0.173018	0.559611
100001253	N-acetylglutamine	Amino Acid	Glutamate Metabolism	-0.094228	-0.232, 0.044	0.172542	0.559611
100003240	N-stearoyltaurine	Lipid	Endocannabinoid	0.190626	-0.09, 0.471	0.174191	0.559611
100001635	ectoine	Xenobiotics	Chemical	-0.289958	-0.719, 0.139	0.17654	0.565229
100002875	1-(1-enyl-palmitoyl)-GPC (P-16:0)*	Lipid	Lysoplasmalogen	0.108428	-0.053, 0.27	0.179255	0.570678
100000870	saccharin	Xenobiotics	Food Component/Plant	-0.442749	-1.101, 0.216	0.179107	0.570678
100001208	1-methyl-4-imidazoleacetate	Amino Acid	Histidine Metabolism	-0.138975	-0.346, 0.068	0.180572	0.571336
100001856	1-stearoyl-2-oleoyl-GPE (18:0/18:1)	Lipid	Phosphatidylethanolamine (PE)	-0.195154	-0.486, 0.096	0.180312	0.571336
100001232	5-dodecenoate (12:1n7)	Lipid	Medium Chain Fatty Acid	-0.163943	-0.409, 0.081	0.180982	0.571336
100001553	1-dihomo-linoleoyl-GPC (20:2)*	Lipid	Lysophospholipid	0.084391	-0.042, 0.211	0.181824	0.57239
100003001	1-(1-enyl-stearoyl)-GPE (P-18:0)*	Lipid	Lysoplasmalogen	0.15762	-0.08, 0.395	0.184227	0.576731
100008903	1,2-dilinoleoyl-GPC (18:2/18:2)	Lipid	Phosphatidylcholine (PC)	0.093195	-0.047, 0.233	0.183744	0.576731
100019892	2-hydroxyarachidate*	Lipid	Fatty Acid, Monohydroxy	-0.16321	-0.411, 0.085	0.187733	0.578074
254	3-hydroxybutyrate (BHBA)	Lipid	Ketone Bodies	-0.363523	-0.912, 0.185	0.185256	0.578074
100001064	glycolithocholate	Lipid	Secondary Bile Acid Metabolism	0.542618	-0.277, 1.363	0.185761	0.578074
100001468	N1-methyl-2-pyridone-5-carboxamide	Cofactors and Vitamins	Nicotinate and Nicotinamide Metabolism	-0.125713	-0.316, 0.065	0.186428	0.578074
100006191	p-cresol glucuronide*	Amino Acid	Tyrosine Metabolism	0.454222	-0.235, 1.144	0.187623	0.578074
477	pristanate	Lipid	Fatty Acid, Branched	-0.250103	-0.629, 0.129	0.186928	0.578074
100009078	1-oleoyl-2-linoleoyl-GPE (18:1/18:2)*	Lipid	Phosphatidylethanolamine (PE)	0.225728	-0.118, 0.57	0.189541	0.578896
100009394	hexadecadienoate (16:2n6)	Lipid	Long Chain Polyunsaturated Fatty Acid (n3 and n6)	-0.168079	-0.424, 0.088	0.189527	0.578896
1161	tigloylglycine	Amino Acid	Leucine, Isoleucine and Valine Metabolism	0.284389	-0.148, 0.717	0.188776	0.578896
100008999	1-(1-enyl-stearoyl)-2-arachidonoyl-GPE (P-18:0/20:4)*	Lipid	Plasmalogen	-0.112165	-0.285, 0.06	0.193097	0.587452
100000943	2-oleoylglycerol (18:1)	Lipid	Monoacylglycerol	0.642666	-0.347, 1.632	0.193906	0.587452
100005383	N-methylpipecolate	Xenobiotics	Bacterial/Fungal	-0.155785	-0.395, 0.084	0.193478	0.587452
100010962	1-palmityl-GPE (O-16:0)*	Lipid	Lysoplasmalogen	0.214206	-0.117, 0.545	0.195733	0.589534
100008992	1-stearoyl-2-docosahexaenoyl-GPE (18:0/22:6)*	Lipid	Phosphatidylethanolamine (PE)	-0.162855	-0.415, 0.089	0.196162	0.589534
100009027	sphingomyelin (d18:0/18:0, d19:0/17:0)*	Lipid	Dihydrosphingomyelins	-0.109659	-0.279, 0.06	0.195487	0.589534
100005418	17alpha-hydroxypregnanolone glucuronide	Lipid	Pregnenolone Steroids	0.294241	-0.163, 0.752	0.197923	0.591221
100021372	2-hydroxy-4-(methylthio)butanoic acid	Amino Acid	Methionine, Cysteine, SAM and Taurine Metabolism	0.092002	-0.051, 0.235	0.198878	0.591221
100020407	enterolactone sulfate	Xenobiotics	Food Component/Plant	0.383246	-0.215, 0.981	0.199471	0.591221
100002568	L-urobilin	Cofactors and Vitamins	Hemoglobin and Porphyrin Metabolism	0.597641	-0.336, 1.531	0.199872	0.591221
100001956	N-methylproline	Amino Acid	Urea cycle; Arginine and Proline Metabolism	-0.326717	-0.837, 0.183	0.199584	0.591221
1111	vanillylmandelate (VMA)	Amino Acid	Tyrosine Metabolism	0.177324	-0.099, 0.454	0.198826	0.591221
100001436	3-ketosphinganine	Lipid	Sphingolipid Synthesis	0.124172	-0.07, 0.318	0.200834	0.592514
1239	2-hydroxystearate	Lipid	Fatty Acid, Monohydroxy	0.776017	-0.44, 1.992	0.201519	0.592981
100000445	theobromine	Xenobiotics	Xanthine Metabolism	-0.460332	-1.184, 0.263	0.202577	0.594543
100000657	1,2-dipalmitoyl-GPC (16:0/16:0)	Lipid	Phosphatidylcholine (PC)	0.214502	-0.126, 0.555	0.206976	0.595254
100001395	1-linoleoyl-GPC (18:2)	Lipid	Lysophospholipid	0.0841	-0.049, 0.217	0.204675	0.595254
100001784	1-palmitoleoyl-GPE (16:1)*	Lipid	Lysophospholipid	0.175605	-0.102, 0.454	0.206078	0.595254
100020853	4-acetylcatechol sulfate (1)	Xenobiotics	Food Component/Plant	-0.290931	-0.752, 0.17	0.206274	0.595254
100020550	deoxycholic acid glucuronide	Lipid	Secondary Bile Acid Metabolism	0.264224	-0.155, 0.684	0.207045	0.595254
100015731	N-palmitoyl-heptadecasphingosine (d17:1/16:0)*	Lipid	Ceramides	0.052812	-0.031, 0.136	0.205647	0.595254
100002989	oleoyl-linoleoyl-glycerol (18:1/18:2) [1]	Lipid	Diacylglycerol	0.143558	-0.083, 0.371	0.205389	0.595254
100021921	succinamic acid	Xenobiotics	Chemical	0.167686	-0.097, 0.432	0.203999	0.595254
100003260	carboxyethyl-GABA	Amino Acid	Glutamate Metabolism	-0.157139	-0.408, 0.093	0.209099	0.599629
424	palmitate (16:0)	Lipid	Long Chain Saturated Fatty Acid	-0.099153	-0.258, 0.059	0.210274	0.60147
100009026	behenoyl dihydrosphingomyelin (d18:0/22:0)*	Lipid	Dihydrosphingomyelins	-0.062588	-0.163, 0.038	0.211928	0.604666
100009271	(S)-3-hydroxybutyrylcarnitine	Lipid	Fatty Acid Metabolism (Acyl Carnitine, Hydroxy)	-0.172842	-0.451, 0.106	0.213699	0.608029
100002152	andro steroid monosulfate C19H28O6S (1)*	Lipid	Androgenic Steroids	0.356885	-0.219, 0.933	0.214186	0.608029
100009028	N-palmitoyl-sphinganine (d18:0/16:0)	Lipid	Dihydroceramides	-0.088165	-0.231, 0.054	0.214845	0.608368
212	5-methylthioadenosine (MTA)	Amino Acid	Polyamine Metabolism	0.054424	-0.034, 0.143	0.216552	0.610538
100002154	ergothioneine	Xenobiotics	Food Component/Plant	0.07939	-0.049, 0.208	0.216695	0.610538
100008919	1-(1-enyl-stearoyl)-2-oleoyl-GPE (P-18:0/18:1)	Lipid	Plasmalogen	-0.1007	-0.265, 0.063	0.218118	0.611573
100006126	4-vinylguaiacol sulfate	Xenobiotics	Food Component/Plant	0.375145	-0.238, 0.988	0.219776	0.611573
100009329	ascorbic acid 2-sulfate	Cofactors and Vitamins	Ascorbate and Aldarate Metabolism	0.066281	-0.042, 0.174	0.219422	0.611573
1256	choline	Lipid	Phospholipid Metabolism	0.058083	-0.037, 0.153	0.219734	0.611573
100003641	valylglycine	Peptide	Dipeptide	0.196169	-0.123, 0.516	0.218381	0.611573
100001481	1-docosahexaenoylglycerol (22:6)	Lipid	Monoacylglycerol	0.436519	-0.279, 1.152	0.22118	0.613965
100015755	ceramide (d18:1/20:0, d16:1/22:0, d20:1/18:0)*	Lipid	Ceramides	0.046618	-0.03, 0.123	0.223857	0.61987
100015618	palmitoyl-docosahexaenoyl-glycerol (16:0/22:6) [1]*	Lipid	Diacylglycerol	-0.567929	-1.506, 0.37	0.224883	0.621184
100009343	1-linoleoyl-2-linolenoyl-GPC (18:2/18:3)*	Lipid	Phosphatidylcholine (PC)	-0.181594	-0.483, 0.12	0.226828	0.623262
100009146	1-stearoyl-2-adrenoyl-GPC (18:0/22:4)*	Lipid	Phosphatidylcholine (PC)	-0.052682	-0.14, 0.035	0.228961	0.623262
100003008	2-stearoyl-GPI (18:0)*	Lipid	Lysophospholipid	0.207592	-0.138, 0.553	0.228405	0.623262
100020491	glucuronide of piperine metabolite C17H21NO3 (3)*	Xenobiotics	Food Component/Plant	-0.524194	-1.394, 0.346	0.226846	0.623262
100021331	metabolonic lactone sulfate	Partially Characterized Molecules	Partially Characterized Molecules	0.128469	-0.085, 0.342	0.227917	0.623262
452	palmitoleate (16:1n7)	Lipid	Long Chain Monounsaturated Fatty Acid	-0.22295	-0.594, 0.148	0.228148	0.623262
100001121	pyridoxate	Cofactors and Vitamins	Vitamin B6 Metabolism	0.086538	-0.058, 0.231	0.229507	0.623262
100001872	1-stearoyl-2-arachidonoyl-GPS (18:0/20:4)	Lipid	Phosphatidylserine (PS)	0.653713	-0.441, 1.748	0.230927	0.625613
100001594	beta-hydroxyisovaleroylcarnitine	Amino Acid	Leucine, Isoleucine and Valine Metabolism	-0.06029	-0.162, 0.041	0.233899	0.63126
358	hypotaurine	Amino Acid	Methionine, Cysteine, SAM and Taurine Metabolism	0.41236	-0.284, 1.108	0.234692	0.63126
535	uridine	Nucleotide	Pyrimidine Metabolism, Uracil containing	0.087966	-0.06, 0.236	0.234291	0.63126
100001278	10-heptadecenoate (17:1n7)	Lipid	Long Chain Monounsaturated Fatty Acid	-0.189528	-0.513, 0.134	0.239313	0.632448
100001271	1-stearoyl-GPC (18:0)	Lipid	Lysophospholipid	0.061284	-0.043, 0.166	0.238885	0.632448
231	arginine	Amino Acid	Urea cycle; Arginine and Proline Metabolism	0.052704	-0.037, 0.143	0.239045	0.632448
100009259	glycocholate glucuronide (1)	Lipid	Primary Bile Acid Metabolism	0.174014	-0.123, 0.471	0.239623	0.632448
100000900	iminodiacetate (IDA)	Xenobiotics	Chemical	-0.031714	-0.086, 0.022	0.239427	0.632448
100021261	leucylhydroxyproline*	Peptide	Dipeptide Derivative	0.09437	-0.066, 0.255	0.238188	0.632448
100004046	N-acetylcarnosine	Amino Acid	Histidine Metabolism	-0.125505	-0.338, 0.087	0.236462	0.632448
100019884	trans-2-hexenoylglycine	Lipid	Fatty Acid Metabolism (Acyl Glycine)	0.319766	-0.224, 0.864	0.238376	0.632448
100001511	1-palmitoleoyl-GPC (16:1)*	Lipid	Lysophospholipid	0.092648	-0.067, 0.252	0.243289	0.635185
100015586	1-palmityl-2-palmitoyl-GPC (O-16:0/16:0)*	Lipid	Plasmalogen	0.059884	-0.044, 0.163	0.245732	0.635185
100001398	3,7-dimethylurate	Xenobiotics	Xanthine Metabolism	0.453599	-0.328, 1.236	0.244329	0.635185
100002028	androstenediol (3beta,17beta) monosulfate (1)	Lipid	Androgenic Steroids	-0.185719	-0.505, 0.134	0.242968	0.635185
331	gamma-glutamylglutamate	Peptide	Gamma-glutamyl Amino Acid	0.151968	-0.11, 0.414	0.244504	0.635185
100020479	indoleacetoylcarnitine*	Amino Acid	Tryptophan Metabolism	0.184625	-0.134, 0.503	0.244818	0.635185
362	inosine 5'-monophosphate (IMP)	Nucleotide	Purine Metabolism, (Hypo)Xanthine/Inosine containing	0.270647	-0.197, 0.738	0.245235	0.635185
100022041	N,N-dimethyl-pro-pro	Peptide	Modified Peptides	0.067996	-0.049, 0.185	0.244631	0.635185
1023	sarcosine	Amino Acid	Glycine, Serine and Threonine Metabolism	-0.082716	-0.225, 0.06	0.244576	0.635185
100000939	1,6-anhydroglucose	Xenobiotics	Food Component/Plant	-0.26281	-0.721, 0.196	0.249714	0.639833
100008985	1-palmitoyl-2-dihomo-linolenoyl-GPC (16:0/20:3n3 or 6)*	Lipid	Phosphatidylcholine (PC)	-0.051665	-0.142, 0.038	0.249802	0.639833
100003434	imidazole propionate	Amino Acid	Histidine Metabolism	0.14062	-0.105, 0.386	0.249649	0.639833
100000016	suberate (C8-DC)	Lipid	Fatty Acid, Dicarboxylate	0.252989	-0.188, 0.694	0.249407	0.639833
100000781	hexanoylcarnitine (C6)	Lipid	Fatty Acid Metabolism (Acyl Carnitine, Medium Chain)	-0.129807	-0.357, 0.097	0.250854	0.64107
100001404	indolebutyrate	Amino Acid	Tryptophan Metabolism	-0.150021	-0.413, 0.113	0.251476	0.641207
100009376	1-(1-enyl-oleoyl)-2-docosahexaenoyl-GPE (P-18:1/22:6)*	Lipid	Plasmalogen	-0.106553	-0.296, 0.083	0.259419	0.641955
100002877	1-(1-enyl-stearoyl)-GPC (P-18:0)*	Lipid	Lysoplasmalogen	0.139026	-0.108, 0.386	0.25809	0.641955
100001155	2-methylbutyrylglycine	Amino Acid	Leucine, Isoleucine and Valine Metabolism	0.466903	-0.362, 1.296	0.258137	0.641955
798	adenosine	Nucleotide	Purine Metabolism, Adenine containing	-0.094881	-0.264, 0.074	0.25914	0.641955
100003271	beta-citrylglutamate	Amino Acid	Glutamate Metabolism	0.138325	-0.108, 0.384	0.258488	0.641955
1090	bilirubin (Z,Z)	Cofactors and Vitamins	Hemoglobin and Porphyrin Metabolism	0.087	-0.068, 0.242	0.259415	0.641955
926	caproate (6:0)	Lipid	Medium Chain Fatty Acid	0.149635	-0.115, 0.415	0.256702	0.641955
1231	dihomo-linoleate (20:2n6)	Lipid	Long Chain Polyunsaturated Fatty Acid (n3 and n6)	-0.156625	-0.433, 0.12	0.255407	0.641955
100021726	GlcNAc sulfate conjugate of C21H34O2 steroid**	Partially Characterized Molecules	Partially Characterized Molecules	0.296619	-0.224, 0.817	0.252376	0.641955
100001593	glutarylcarnitine (C5-DC)	Amino Acid	Lysine Metabolism	0.071164	-0.055, 0.197	0.255966	0.641955
100003179	leucylalanine	Peptide	Dipeptide	0.153017	-0.118, 0.424	0.257338	0.641955
818	malonate	Lipid	Fatty Acid Synthesis	0.166952	-0.131, 0.465	0.259744	0.641955
1547	N-stearoyl-sphingosine (d18:1/18:0)*	Lipid	Ceramides	0.043476	-0.034, 0.121	0.257767	0.641955
498	retinol (vitamin A)	Cofactors and Vitamins	Vitamin A Metabolism	0.042224	-0.032, 0.117	0.256275	0.641955
100000491	gamma-glutamylphenylalanine	Peptide	Gamma-glutamyl Amino Acid	0.068756	-0.054, 0.192	0.261663	0.64247
100000963	homocitrulline	Amino Acid	Urea cycle; Arginine and Proline Metabolism	0.204411	-0.161, 0.57	0.26113	0.64247
100021530	S-carboxyethylcysteine	Amino Acid	Methionine, Cysteine, SAM and Taurine Metabolism	-0.144971	-0.404, 0.114	0.261636	0.64247
100001417	phenylacetylglutamine	Peptide	Acetylated Peptides	0.207758	-0.165, 0.581	0.263272	0.645016
100002241	7-methylurate	Xenobiotics	Xanthine Metabolism	0.151674	-0.122, 0.425	0.265405	0.648833
100019831	3-hydroxyphenylacetoylglutamine	Peptide	Acetylated Peptides	-0.255467	-0.717, 0.206	0.266459	0.649853
100002105	stearamide (18:0)	Lipid	Fatty Acid, Amide	0.089268	-0.072, 0.251	0.266976	0.649853
100001777	1-oleoyl-GPI (18:1)	Lipid	Lysophospholipid	-0.180527	-0.512, 0.151	0.273413	0.653352
100001263	1-palmitoyl-GPC (16:0)	Lipid	Lysophospholipid	0.088157	-0.072, 0.249	0.269448	0.653352
100000616	1-stearoyl-2-arachidonoyl-GPI (18:0/20:4)	Lipid	Phosphatidylinositol (PI)	0.059153	-0.049, 0.167	0.272388	0.653352
100009215	1-stearoyl-2-dihomo-linolenoyl-GPE (18:0/20:3n3 or 6)*	Lipid	Phosphatidylethanolamine (PE)	-0.116866	-0.33, 0.097	0.271162	0.653352
100005391	3-(3-hydroxyphenyl)propionate sulfate	Xenobiotics	Benzoate Metabolism	0.53412	-0.452, 1.52	0.276178	0.653352
100021990	3-hydroxyoctanoylcarnitine (1)	Lipid	Fatty Acid Metabolism (Acyl Carnitine, Hydroxy)	-0.128879	-0.367, 0.109	0.275787	0.653352
100001251	decanoylcarnitine (C10)	Lipid	Fatty Acid Metabolism (Acyl Carnitine, Medium Chain)	-0.135769	-0.386, 0.114	0.275404	0.653352
100001320	erythronate*	Carbohydrate	Aminosugar Metabolism	-0.033987	-0.096, 0.028	0.27001	0.653352
100000258	glycerol 3-phosphate	Lipid	Glycerolipid Metabolism	-0.138843	-0.395, 0.118	0.276529	0.653352
100020513	N-acetylhomocitrulline	Amino Acid	Urea cycle; Arginine and Proline Metabolism	0.164717	-0.138, 0.468	0.274451	0.653352
100022479	N-lactoyl isoleucine	Amino Acid	Lactoyl Amino Acid	-0.313954	-0.892, 0.264	0.275192	0.653352
100009331	oleoylcholine	Lipid	Fatty Acid Metabolism (Acyl Choline)	0.210081	-0.177, 0.598	0.275734	0.653352
100009233	palmitoylcholine	Lipid	Fatty Acid Metabolism (Acyl Choline)	0.216928	-0.181, 0.615	0.273452	0.653352
100000015	xanthurenate	Amino Acid	Tryptophan Metabolism	-0.185998	-0.528, 0.156	0.274368	0.653352
503	serine	Amino Acid	Glycine, Serine and Threonine Metabolism	0.045342	-0.039, 0.13	0.278821	0.657387
100001051	1-methylhistidine	Amino Acid	Histidine Metabolism	-0.149917	-0.431, 0.131	0.284019	0.657903
100020536	4-ethylcatechol sulfate	Xenobiotics	Benzoate Metabolism	-0.341383	-0.981, 0.298	0.28298	0.657903
100001322	fibrinopeptide A*	Peptide	Fibrinogen Cleavage Peptide	-0.438226	-1.261, 0.385	0.284294	0.657903
100015797	heneicosapentaenoate (21:5n3)	Lipid	Long Chain Polyunsaturated Fatty Acid (n3 and n6)	-0.311241	-0.895, 0.272	0.283414	0.657903
925	heptanoate (7:0)	Lipid	Medium Chain Fatty Acid	0.046986	-0.041, 0.135	0.281689	0.657903
100004318	indolin-2-one	Xenobiotics	Food Component/Plant	0.162658	-0.141, 0.467	0.281978	0.657903
100009053	palmitoleoyl-oleoyl-glycerol (16:1/18:1) [1]*	Lipid	Diacylglycerol	0.27579	-0.24, 0.791	0.281886	0.657903
100006108	phenylacetylcarnitine	Peptide	Acetylated Peptides	0.267043	-0.232, 0.766	0.281671	0.657903
100006282	umbelliferone sulfate	Xenobiotics	Food Component/Plant	0.419224	-0.363, 1.201	0.28091	0.657903
100015590	1-stearyl-2-linoleoyl-GPC (O-18:0/18:2)*	Lipid	Plasmalogen	-0.125822	-0.363, 0.111	0.285847	0.658792
100015745	glycosyl ceramide (d18:2/24:1, d18:1/24:2)*	Lipid	Hexosylceramides (HCER)	0.045274	-0.04, 0.131	0.285585	0.658792
439	stearate (18:0)	Lipid	Long Chain Saturated Fatty Acid	-0.084398	-0.244, 0.075	0.286877	0.659818
100009239	isocitric lactone	Energy	TCA Cycle	-0.157545	-0.456, 0.14	0.287594	0.660118
100000437	theophylline	Xenobiotics	Xanthine Metabolism	-0.360642	-1.046, 0.325	0.289981	0.664245
565	tryptophan	Amino Acid	Tryptophan Metabolism	0.03173	-0.029, 0.092	0.290707	0.664558
100000773	3-hydroxyoctanoate	Lipid	Fatty Acid, Monohydroxy	-0.244304	-0.711, 0.222	0.291956	0.664715
100006360	dopamine 4-sulfate	Amino Acid	Tyrosine Metabolism	0.180381	-0.164, 0.525	0.291769	0.664715
250	biliverdin	Cofactors and Vitamins	Hemoglobin and Porphyrin Metabolism	0.121361	-0.111, 0.354	0.293224	0.664917
100015762	docosatrienoate (22:3n6)*	Lipid	Long Chain Polyunsaturated Fatty Acid (n3 and n6)	-0.338088	-0.985, 0.309	0.29312	0.664917
302	deoxycholate	Lipid	Secondary Bile Acid Metabolism	0.379613	-0.351, 1.11	0.295688	0.667817
100015793	sphingomyelin (d17:2/16:0, d18:2/15:0)*	Lipid	Sphingomyelins	0.042678	-0.039, 0.125	0.295366	0.667817
100001557	2-linoleoyl-GPC (18:2)*	Lipid	Lysophospholipid	0.108763	-0.101, 0.319	0.297522	0.667944
100001446	5-methyluridine (ribothymidine)	Nucleotide	Pyrimidine Metabolism, Uracil containing	-0.068174	-0.2, 0.063	0.297318	0.667944
100000863	adipate (C6-DC)	Lipid	Fatty Acid, Dicarboxylate	-0.135124	-0.396, 0.126	0.29689	0.667944
100001555	2-stearoyl-GPC (18:0)*	Lipid	Lysophospholipid	0.251936	-0.237, 0.741	0.300216	0.668662
100020908	fibrinopeptide B (1-13)**	Peptide	Fibrinogen Cleavage Peptide	-0.398949	-1.174, 0.376	0.300007	0.668662
192	N-acetylputrescine	Amino Acid	Polyamine Metabolism	0.061816	-0.058, 0.182	0.300177	0.668662
100015789	sphingomyelin (d18:2/24:2)*	Lipid	Sphingomyelins	0.058392	-0.055, 0.172	0.300052	0.668662
100005864	methyl glucopyranoside (alpha + beta)	Xenobiotics	Food Component/Plant	-0.300002	-0.884, 0.284	0.301559	0.669367
100001247	octanoylcarnitine (C8)	Lipid	Fatty Acid Metabolism (Acyl Carnitine, Medium Chain)	-0.119858	-0.353, 0.114	0.30172	0.669367
100009360	1-oleoyl-2-docosapentaenoyl-GPC (18:1/22:5n3)*	Lipid	Phosphatidylcholine (PC)	0.091967	-0.088, 0.272	0.303184	0.671293
100001182	docosadienoate (22:2n6)	Lipid	Long Chain Polyunsaturated Fatty Acid (n3 and n6)	-0.168784	-0.5, 0.162	0.304945	0.673869
100005834	9-hydroxystearate	Lipid	Fatty Acid, Monohydroxy	-0.218397	-0.649, 0.213	0.307672	0.677239
100001994	androstenediol (3beta,17beta) disulfate (2)	Lipid	Androgenic Steroids	-0.246037	-0.731, 0.239	0.307284	0.677239
100000409	2-isopropylmalate	Xenobiotics	Food Component/Plant	-0.213909	-0.638, 0.21	0.30934	0.678261
100001951	bilirubin (E,Z or Z,E)*	Cofactors and Vitamins	Hemoglobin and Porphyrin Metabolism	0.128634	-0.126, 0.383	0.309024	0.678261
100020371	N,N-dimethylalanine	Amino Acid	Alanine and Aspartate Metabolism	-0.111509	-0.333, 0.11	0.309952	0.678284
100002784	2-oxoarginine*	Amino Acid	Urea cycle; Arginine and Proline Metabolism	-0.101264	-0.303, 0.101	0.312738	0.680416
100021141	3-hydroxydecanoylcarnitine	Lipid	Fatty Acid Metabolism (Acyl Carnitine, Hydroxy)	-0.128412	-0.384, 0.128	0.31239	0.680416
100021992	cis-3,4-methyleneheptanoylglycine	Lipid	Fatty Acid Metabolism (Acyl Glycine)	0.172475	-0.171, 0.516	0.312363	0.680416
100015850	adrenoylcarnitine (C22:4)*	Lipid	Fatty Acid Metabolism (Acyl Carnitine, Polyunsaturated)	0.087036	-0.087, 0.261	0.314791	0.68225
100021709	branched-chain, straight-chain, or cyclopropyl 12:1 fatty acid*	Partially Characterized Molecules	Partially Characterized Molecules	-0.192462	-0.578, 0.193	0.314501	0.68225
100020502	sulfate of piperine metabolite C18H21NO3 (1)*	Xenobiotics	Food Component/Plant	0.552129	-0.556, 1.66	0.315538	0.682555
100005351	1-eicosapentaenoyl-GPC (20:5)*	Lipid	Lysophospholipid	-0.07992	-0.241, 0.081	0.317805	0.68483
100001527	hexanoylglycine	Lipid	Fatty Acid Metabolism (Acyl Glycine)	0.235257	-0.239, 0.709	0.317558	0.68483
100006373	1,2,3-benzenetriol sulfate (1)	Xenobiotics	Chemical	-0.207966	-0.629, 0.213	0.319409	0.685665
100002462	5-(galactosylhydroxy)-lysine	Amino Acid	Lysine Metabolism	-0.182038	-0.55, 0.186	0.319373	0.685665
100001007	ribonate	Carbohydrate	Pentose Metabolism	-0.038466	-0.117, 0.04	0.32265	0.691305
100001104	N-acetyltyrosine	Amino Acid	Tyrosine Metabolism	-0.099586	-0.304, 0.104	0.325231	0.695514
100005353	1-nonadecanoyl-GPC (19:0)	Lipid	Lysophospholipid	0.078834	-0.084, 0.241	0.328126	0.700374
100002227	4-cholesten-3-one	Lipid	Sterol	0.224783	-0.242, 0.692	0.332333	0.705966
100002018	5alpha-androstan-3alpha,17beta-diol monosulfate (1)	Lipid	Androgenic Steroids	-0.248215	-0.764, 0.268	0.332624	0.705966
100021667	branched-chain, straight-chain, or cyclopropyl 10:1 fatty acid (2)*	Partially Characterized Molecules	Partially Characterized Molecules	0.469964	-0.51, 1.449	0.333617	0.705966
100006171	eugenol sulfate	Xenobiotics	Food Component/Plant	-0.399218	-1.234, 0.435	0.33493	0.705966
100020205	hydroxyasparagine**	Amino Acid	Alanine and Aspartate Metabolism	0.025129	-0.027, 0.078	0.334777	0.705966
100021198	picolinoylglycine	Lipid	Fatty Acid Metabolism (Acyl Glycine)	0.112192	-0.122, 0.347	0.33513	0.705966
100015786	sphingomyelin (d18:0/20:0, d16:0/22:0)*	Lipid	Dihydrosphingomyelins	-0.133079	-0.411, 0.145	0.334386	0.705966
100015620	lactosyl-N-nervonoyl-sphingosine (d18:1/24:1)*	Lipid	Lactosylceramides (LCER)	0.024832	-0.027, 0.077	0.336098	0.706684
100009332	arachidonoylcholine	Lipid	Fatty Acid Metabolism (Acyl Choline)	0.168263	-0.185, 0.522	0.33754	0.707078
100022015	bilirubin degradation product, C16H18N2O5 (4)**	Partially Characterized Molecules	Partially Characterized Molecules	-0.225913	-0.701, 0.249	0.337447	0.707078
100005367	N-acetylalliin	Xenobiotics	Food Component/Plant	-0.386908	-1.202, 0.429	0.338974	0.708764
913	maltose	Carbohydrate	Glycogen Metabolism	0.323854	-0.36, 1.008	0.339721	0.70901
100001668	1-ribosyl-imidazoleacetate*	Amino Acid	Histidine Metabolism	0.133085	-0.148, 0.414	0.34036	0.70903
1110	N-acetylalanine	Amino Acid	Alanine and Aspartate Metabolism	-0.021194	-0.066, 0.024	0.341054	0.709166
100020825	3-hydroxyhexanoylcarnitine (1)	Lipid	Fatty Acid Metabolism (Acyl Carnitine, Hydroxy)	-0.122089	-0.381, 0.137	0.342314	0.710442
100001882	glycosyl-N-stearoyl-sphingosine (d18:1/18:0)	Lipid	Hexosylceramides (HCER)	0.050538	-0.057, 0.158	0.342929	0.710442
100006065	cyclo(pro-val)	Peptide	Dipeptide	-0.116121	-0.364, 0.131	0.34439	0.710857
100020753	palmitoleamide (16:1)*	Lipid	Fatty Acid, Amide	-0.226887	-0.71, 0.257	0.344138	0.710857
100001287	epiandrosterone sulfate	Lipid	Androgenic Steroids	-0.12206	-0.383, 0.139	0.34522	0.711266
100008905	1,2-dioleoyl-GPC (18:1/18:1)	Lipid	Phosphatidylcholine (PC)	-0.005114	-0.016, 0.006	0.346445	0.712061
100001102	dodecanedioate (C12-DC)	Lipid	Fatty Acid, Dicarboxylate	0.407531	-0.466, 1.281	0.346869	0.712061
100005372	1-(1-enyl-oleoyl)-GPE (P-18:1)*	Lipid	Lysoplasmalogen	0.117436	-0.14, 0.375	0.358092	0.712081
100009148	1-oleoyl-2-dihomo-linolenoyl-GPC (18:1/20:3)*	Lipid	Phosphatidylcholine (PC)	0.076023	-0.09, 0.242	0.355365	0.712081
100009051	1-stearoyl-2-dihomo-linolenoyl-GPC (18:0/20:3n3 or 6)*	Lipid	Phosphatidylcholine (PC)	-0.034052	-0.109, 0.041	0.35966	0.712081
100002367	2R,3R-dihydroxybutyrate	Lipid	Fatty Acid, Dihydroxy	-0.059442	-0.19, 0.071	0.35831	0.712081
100021991	3-hydroxyoctanoylcarnitine (2)	Lipid	Fatty Acid Metabolism (Acyl Carnitine, Hydroxy)	-0.114971	-0.363, 0.133	0.349438	0.712081
100002014	5alpha-pregnan-3beta,20alpha-diol monosulfate (2)	Lipid	Progestin Steroids	-0.159213	-0.504, 0.186	0.352068	0.712081
100002009	5alpha-pregnan-3beta,20beta-diol monosulfate (1)	Lipid	Progestin Steroids	0.126402	-0.151, 0.403	0.357467	0.712081
100020414	6-bromotryptophan	Amino Acid	Tryptophan Metabolism	-0.065465	-0.211, 0.08	0.362674	0.712081
100004555	benzoylcarnitine*	Xenobiotics	Chemical	-0.256747	-0.826, 0.312	0.362675	0.712081
100002466	cysteinylglycine disulfide*	Amino Acid	Glutathione Metabolism	-0.035529	-0.114, 0.042	0.358437	0.712081
100020377	ethyl beta-glucopyranoside	Xenobiotics	Food Component/Plant	-0.461868	-1.462, 0.538	0.351651	0.712081
100001843	gamma-glutamylalanine	Peptide	Gamma-glutamyl Amino Acid	0.276781	-0.332, 0.886	0.359408	0.712081
100020259	glutamine conjugate of C7H12O2*	Partially Characterized Molecules	Partially Characterized Molecules	-0.269367	-0.864, 0.325	0.360832	0.712081
100015752	glycosyl-N-(2-hydroxynervonoyl)-sphingosine (d18:1/24:1(2OH))*	Lipid	Hexosylceramides (HCER)	-0.045503	-0.144, 0.053	0.349351	0.712081
98	kynurenate	Amino Acid	Tryptophan Metabolism	0.055432	-0.066, 0.177	0.359011	0.712081
100006726	linoleoyl ethanolamide	Lipid	Endocannabinoid	-0.178727	-0.572, 0.214	0.35921	0.712081
100015760	linoleoylcholine*	Lipid	Fatty Acid Metabolism (Acyl Choline)	0.17524	-0.207, 0.557	0.354802	0.712081
1242	N1-methyladenosine	Nucleotide	Purine Metabolism, Adenine containing	0.045144	-0.055, 0.145	0.361977	0.712081
1082	N-acetylleucine	Amino Acid	Leucine, Isoleucine and Valine Metabolism	-0.108111	-0.343, 0.127	0.352936	0.712081
100022485	N-lactoyl valine	Amino Acid	Lactoyl Amino Acid	-0.088861	-0.285, 0.107	0.361136	0.712081
100003239	N-palmitoyltaurine	Lipid	Endocannabinoid	0.223434	-0.261, 0.708	0.35284	0.712081
100005384	O-sulfo-tyrosine	Xenobiotics	Chemical	0.06753	-0.081, 0.216	0.360105	0.712081
100000406	ribitol	Carbohydrate	Pentose Metabolism	-0.067643	-0.217, 0.081	0.360053	0.712081
100006296	sphingomyelin (d18:1/22:2, d18:2/22:1, d16:1/24:2)*	Lipid	Sphingomyelins	0.050533	-0.058, 0.159	0.348507	0.712081
100021220	succinoyltaurine	Amino Acid	Methionine, Cysteine, SAM and Taurine Metabolism	0.141714	-0.166, 0.449	0.3527	0.712081
100016038	(N(1) + N(8))-acetylspermidine	Amino Acid	Polyamine Metabolism	0.088277	-0.11, 0.287	0.36949	0.720442
100009000	1-(1-enyl-palmitoyl)-2-docosahexaenoyl-GPE (P-16:0/22:6)*	Lipid	Plasmalogen	-0.046804	-0.152, 0.058	0.369297	0.720442
1504	oleamide	Lipid	Fatty Acid, Amide	-0.280556	-0.91, 0.349	0.368893	0.720442
100015792	sphingomyelin (d18:1/25:0, d19:0/24:1, d20:1/23:0, d19:1/24:0)*	Lipid	Sphingomyelins	-0.033912	-0.11, 0.042	0.368962	0.720442
100021238	phenylalanylhydroxyproline*	Peptide	Dipeptide	0.291295	-0.365, 0.948	0.370829	0.721803
100009246	2-methylserine	Amino Acid	Glycine, Serine and Threonine Metabolism	0.143532	-0.182, 0.469	0.374025	0.722097
828	arabinose	Carbohydrate	Pentose Metabolism	0.545157	-0.693, 1.783	0.374183	0.722097
356	cortisol	Lipid	Corticosteroids	-0.126021	-0.411, 0.159	0.372267	0.722097
100020496	sulfate of piperine metabolite C16H19NO3 (2)*	Xenobiotics	Food Component/Plant	-0.242483	-0.791, 0.306	0.372698	0.722097
100020343	tetradecadienoate (14:2)*	Lipid	Long Chain Polyunsaturated Fatty Acid (n3 and n6)	-0.139846	-0.457, 0.177	0.372952	0.722097
1136	valerate (5:0)	Lipid	Short Chain Fatty Acid	0.045035	-0.058, 0.148	0.379469	0.731046
100001403	5-acetylamino-6-amino-3-methyluracil	Xenobiotics	Xanthine Metabolism	-0.302897	-1.007, 0.401	0.385086	0.733615
100015841	erucoylcarnitine (C22:1)*	Lipid	Fatty Acid Metabolism (Acyl Carnitine, Monounsaturated)	-0.201642	-0.672, 0.268	0.386429	0.733615
100001323	fibrinopeptide A, des-ala(1)*	Peptide	Fibrinogen Cleavage Peptide	-0.503163	-1.676, 0.67	0.386603	0.733615
1254	glycerol	Lipid	Glycerolipid Metabolism	-0.117101	-0.387, 0.153	0.381843	0.733615
100001878	glycosyl-N-nervonoyl-sphingosine (d18:1/24:1)*	Lipid	Hexosylceramides (HCER)	0.322514	-0.426, 1.071	0.384382	0.733615
100002185	indole-3-carboxylate	Amino Acid	Tryptophan Metabolism	0.113868	-0.151, 0.379	0.386326	0.733615
189	N6,N6,N6-trimethyllysine	Amino Acid	Lysine Metabolism	-0.067831	-0.225, 0.09	0.384904	0.733615
100000787	N-acetylaspartate (NAA)	Amino Acid	Alanine and Aspartate Metabolism	-0.03821	-0.127, 0.051	0.386661	0.733615
252	succinate	Energy	TCA Cycle	0.037976	-0.05, 0.126	0.382531	0.733615
827	cytidine	Nucleotide	Pyrimidine Metabolism, Cytidine containing	-0.184112	-0.615, 0.247	0.38848	0.735695
100022172	perfluorohexanesulfonate (PFHxS)	Xenobiotics	Chemical	-0.254135	-0.85, 0.342	0.389063	0.735695
100002874	1-nervonoyl-GPC (24:1n9)*	Lipid	Lysophospholipid	0.111221	-0.152, 0.375	0.394222	0.738021
100010834	3-methylglutarate/2-methylglutarate	Lipid	Fatty Acid, Dicarboxylate	-0.126947	-0.428, 0.174	0.394131	0.738021
100006104	m-tyramine sulfate	Amino Acid	Tyrosine Metabolism	-0.140256	-0.472, 0.191	0.392946	0.738021
100005466	N-acetyltaurine	Amino Acid	Methionine, Cysteine, SAM and Taurine Metabolism	-0.269678	-0.907, 0.368	0.393014	0.738021
100022480	N-lactoyl leucine	Amino Acid	Lactoyl Amino Acid	-0.192095	-0.645, 0.261	0.391845	0.738021
100005986	sphingomyelin (d18:1/24:1, d18:2/24:0)*	Lipid	Sphingomyelins	0.042405	-0.058, 0.143	0.394079	0.738021
100010966	1-palmityl-2-stearoyl-GPC (O-16:0/18:0)*	Lipid	Plasmalogen	0.043382	-0.06, 0.147	0.397854	0.73863
100000997	3-hydroxydecanoate	Lipid	Fatty Acid, Monohydroxy	-0.112811	-0.382, 0.156	0.396705	0.73863
100001977	beta-cryptoxanthin	Cofactors and Vitamins	Vitamin A Metabolism	-0.037012	-0.126, 0.052	0.39848	0.73863
100009264	glycochenodeoxycholate glucuronide (1)	Lipid	Primary Bile Acid Metabolism	0.361819	-0.5, 1.224	0.396519	0.73863
100010942	linoleoyl-linoleoyl-glycerol (18:2/18:2) [2]*	Lipid	Diacylglycerol	-0.820736	-2.78, 1.139	0.397642	0.73863
100008930	oleate/vaccenate (18:1)	Lipid	Long Chain Monounsaturated Fatty Acid	-0.086766	-0.293, 0.119	0.39567	0.73863
100001551	1-arachidonoyl-GPC (20:4n6)*	Lipid	Lysophospholipid	0.04509	-0.063, 0.153	0.400751	0.739336
100004561	N-formylanthranilic acid	Amino Acid	Tryptophan Metabolism	0.107769	-0.151, 0.366	0.400228	0.739336
100009334	palmitoloelycholine	Lipid	Fatty Acid Metabolism (Acyl Choline)	0.156598	-0.22, 0.533	0.400829	0.739336
100021707	3-bromo-5-chloro-2,6-dihydroxybenzoic acid*	Xenobiotics	Chemical	0.093282	-0.131, 0.318	0.401844	0.739996
100000840	tartronate (hydroxymalonate)	Xenobiotics	Food Component/Plant	0.163765	-0.232, 0.56	0.403684	0.742172
100001501	oleoylcarnitine (C18:1)	Lipid	Fatty Acid Metabolism (Acyl Carnitine, Monounsaturated)	0.056766	-0.081, 0.195	0.40573	0.744719
1022	picolinate	Amino Acid	Tryptophan Metabolism	-0.088647	-0.305, 0.128	0.407884	0.747456
100004111	4-methylcatechol sulfate	Xenobiotics	Benzoate Metabolism	-0.221185	-0.765, 0.322	0.410902	0.750537
100020549	cholic acid glucuronide	Lipid	Primary Bile Acid Metabolism	0.34448	-0.501, 1.19	0.410558	0.750537
100000257	glucuronate	Carbohydrate	Aminosugar Metabolism	-0.055968	-0.194, 0.082	0.411563	0.750537
100009219	1-oleoyl-2-arachidonoyl-GPE (18:1/20:4)*	Lipid	Phosphatidylethanolamine (PE)	0.057845	-0.085, 0.201	0.413002	0.751945
100020217	N,N,N-trimethyl-alanylproline betaine (TMAP)	Amino Acid	Urea cycle; Arginine and Proline Metabolism	0.053734	-0.079, 0.187	0.414256	0.75301
100001425	5,6-dihydrouridine	Nucleotide	Pyrimidine Metabolism, Uracil containing	0.067545	-0.101, 0.236	0.417055	0.75566
826	xylose	Carbohydrate	Pentose Metabolism	-0.14636	-0.51, 0.218	0.416524	0.75566
1114	3-aminoisobutyrate	Nucleotide	Pyrimidine Metabolism, Thymine containing	-0.055748	-0.195, 0.084	0.419114	0.758173
100000442	quinate	Xenobiotics	Food Component/Plant	-0.193885	-0.681, 0.293	0.421015	0.760391
100002990	oleoyl-linoleoyl-glycerol (18:1/18:2) [2]	Lipid	Diacylglycerol	0.129937	-0.197, 0.457	0.421829	0.760642
100000010	3-phenylpropionate (hydrocinnamate)	Xenobiotics	Benzoate Metabolism	-0.242707	-0.854, 0.369	0.422753	0.76109
100009160	1-(1-enyl-palmitoyl)-2-palmitoleoyl-GPC (P-16:0/16:1)*	Lipid	Plasmalogen	-0.029806	-0.105, 0.046	0.424402	0.761627
100015838	eicosenoylcarnitine (C20:1)*	Lipid	Fatty Acid Metabolism (Acyl Carnitine, Monounsaturated)	0.058341	-0.089, 0.206	0.424224	0.761627
100016069	5-dodecenoylcarnitine (C12:1)	Lipid	Fatty Acid Metabolism (Acyl Carnitine, Monounsaturated)	-0.142745	-0.506, 0.22	0.426542	0.76225
848	cotinine	Xenobiotics	Tobacco Metabolite	-0.063919	-0.226, 0.099	0.426776	0.76225
100006378	N-acetylkynurenine (2)	Amino Acid	Tryptophan Metabolism	-0.118	-0.418, 0.182	0.426879	0.76225
100003696	succinimide	Xenobiotics	Chemical	0.050595	-0.078, 0.179	0.427455	0.76225
100008991	1-palmitoyl-2-docosahexaenoyl-GPE (16:0/22:6)*	Lipid	Phosphatidylethanolamine (PE)	-0.076805	-0.273, 0.119	0.428277	0.762449
132	3-phosphoglycerate	Carbohydrate	Glycolysis, Gluconeogenesis, and Pyruvate Metabolism	0.147868	-0.234, 0.53	0.433656	0.762449
209	adenosine 5'-monophosphate (AMP)	Nucleotide	Purine Metabolism, Adenine containing	-0.124018	-0.444, 0.196	0.432934	0.762449
1224	cys-gly, oxidized	Amino Acid	Glutathione Metabolism	-0.060736	-0.217, 0.096	0.432902	0.762449
180	linoleate (18:2n6)	Lipid	Long Chain Polyunsaturated Fatty Acid (n3 and n6)	-0.098201	-0.351, 0.155	0.432387	0.762449
100015923	N-oxalyl glycine (NOG)	Xenobiotics	Food Component/Plant	-0.084706	-0.302, 0.132	0.430048	0.762449
100002067	pregnenediol sulfate (C21H34O5S)*	Lipid	Pregnenolone Steroids	0.08683	-0.136, 0.309	0.430292	0.762449
100003678	prolylproline	Peptide	Dipeptide	0.135974	-0.214, 0.486	0.432284	0.762449
100015791	sphingomyelin (d18:2/23:1)*	Lipid	Sphingomyelins	0.025421	-0.04, 0.091	0.433016	0.762449
100001988	5alpha-pregnan-3beta,20alpha-diol disulfate	Lipid	Progestin Steroids	0.284402	-0.453, 1.021	0.435442	0.764397
100001778	1-linoleoyl-GPI (18:2)*	Lipid	Lysophospholipid	0.093623	-0.15, 0.338	0.437801	0.7662
100005716	1-oleoyl-GPG (18:1)*	Lipid	Lysophospholipid	0.170004	-0.274, 0.614	0.438487	0.7662
100009345	1-palmitoleoyl-2-linolenoyl-GPC (16:1/18:3)*	Lipid	Phosphatidylcholine (PC)	0.121978	-0.197, 0.441	0.439202	0.7662
100003425	cis-urocanate	Amino Acid	Histidine Metabolism	-0.203339	-0.735, 0.328	0.439053	0.7662
338	gluconate	Xenobiotics	Food Component/Plant	0.032647	-0.053, 0.118	0.439868	0.7662
100008976	1-stearoyl-2-linoleoyl-GPE (18:0/18:2)*	Lipid	Phosphatidylethanolamine (PE)	-0.061796	-0.224, 0.1	0.44124	0.76622
100020254	glycine conjugate of C10H14O2 (1)*	Partially Characterized Molecules	Partially Characterized Molecules	0.103062	-0.167, 0.373	0.441013	0.76622
100001150	propionylglycine	Lipid	Fatty Acid Metabolism (also BCAA Metabolism)	0.194146	-0.317, 0.705	0.442311	0.7669
100006614	adipoylcarnitine (C6-DC)	Lipid	Fatty Acid Metabolism (Acyl Carnitine, Dicarboxylate)	-0.094777	-0.345, 0.155	0.443618	0.76738
917	asparagine	Amino Acid	Alanine and Aspartate Metabolism	0.024643	-0.04, 0.09	0.44395	0.76738
100000639	1-stearoyl-2-oleoyl-GPS (18:0/18:1)	Lipid	Phosphatidylserine (PS)	0.233805	-0.387, 0.855	0.446719	0.768686
100008934	2-hydroxylaurate	Lipid	Fatty Acid, Monohydroxy	0.276658	-0.457, 1.011	0.446007	0.768686
100002122	3-hydroxyhippurate	Xenobiotics	Benzoate Metabolism	0.284268	-0.477, 1.045	0.450162	0.768686
100006379	C-glycosyltryptophan	Amino Acid	Tryptophan Metabolism	-0.06216	-0.228, 0.104	0.448247	0.768686
100020261	glutamine conjugate of C6H10O2 (1)*	Partially Characterized Molecules	Partially Characterized Molecules	-0.12849	-0.471, 0.214	0.448202	0.768686
100001540	glutamine_degradant*	Partially Characterized Molecules	Partially Characterized Molecules	0.047621	-0.079, 0.175	0.448319	0.768686
100004088	retinal	Cofactors and Vitamins	Vitamin A Metabolism	0.115097	-0.193, 0.423	0.449768	0.768686
100015788	sphingomyelin (d18:2/18:1)*	Lipid	Sphingomyelins	0.034641	-0.058, 0.127	0.449882	0.768686
1489	palmitoyl ethanolamide	Lipid	Endocannabinoid	-0.109748	-0.407, 0.187	0.45464	0.775159
880	adenine	Nucleotide	Purine Metabolism, Adenine containing	0.093629	-0.162, 0.349	0.457993	0.77852
100000808	cysteine s-sulfate	Amino Acid	Methionine, Cysteine, SAM and Taurine Metabolism	0.043521	-0.075, 0.162	0.457976	0.77852
100008996	1-palmitoyl-2-palmitoleoyl-GPE (16:0/16:1)*	Lipid	Phosphatidylethanolamine (PE)	-0.103882	-0.388, 0.18	0.459094	0.779215
100006298	lignoceroyl sphingomyelin (d18:1/24:0)	Lipid	Sphingomyelins	-0.01974	-0.074, 0.034	0.459994	0.779569
100002024	5alpha-androstan-3beta,17beta-diol monosulfate (2)	Lipid	Androgenic Steroids	-0.110536	-0.415, 0.194	0.462963	0.783423
100001730	3,4-dihydroxybutyrate	Lipid	Fatty Acid, Dihydroxy	-0.033837	-0.127, 0.06	0.464708	0.785197
361	inosine	Nucleotide	Purine Metabolism, (Hypo)Xanthine/Inosine containing	-0.089335	-0.337, 0.158	0.465629	0.785575
100009035	1-pentadecanoyl-2-linoleoyl-GPC (15:0/18:2)*	Lipid	Phosphatidylcholine (PC)	-0.038358	-0.146, 0.069	0.46903	0.786602
100015688	1-stearoyl-2-(hydroxylinoleoyl)-GPC (18:0/18:2(OH))*	Lipid	Phosphatidylcholine (PC)	-0.082533	-0.312, 0.147	0.467749	0.786602
100001556	2-oleoyl-GPC (18:1)*	Lipid	Lysophospholipid	0.078326	-0.14, 0.297	0.467951	0.786602
1235	gamma-glutamylhistidine	Peptide	Gamma-glutamyl Amino Acid	0.034535	-0.062, 0.131	0.468364	0.786602
100000774	phenyllactate (PLA)	Amino Acid	Phenylalanine Metabolism	0.037251	-0.067, 0.142	0.470674	0.788187
100019992	glucuronide of C10H18O2 (3)*	Partially Characterized Molecules	Partially Characterized Molecules	0.057919	-0.105, 0.221	0.471379	0.788196
100004208	guaiacol sulfate	Xenobiotics	Benzoate Metabolism	0.13954	-0.255, 0.534	0.474044	0.790225
100004059	histidine betaine (hercynine)*	Xenobiotics	Food Component/Plant	0.084882	-0.155, 0.324	0.473444	0.790225
100021140	levulinoylcarnitine	Xenobiotics	Food Component/Plant	-0.149025	-0.571, 0.273	0.474696	0.790225
100009220	1-oleoyl-2-docosahexaenoyl-GPE (18:1/22:6)*	Lipid	Phosphatidylethanolamine (PE)	-0.101563	-0.392, 0.189	0.478792	0.7912
100008977	1-stearoyl-2-arachidonoyl-GPE (18:0/20:4)	Lipid	Phosphatidylethanolamine (PE)	-0.053084	-0.205, 0.098	0.47826	0.7912
799	betaine	Amino Acid	Glycine, Serine and Threonine Metabolism	-0.025627	-0.098, 0.047	0.476665	0.7912
100001393	isovalerylcarnitine (C5)	Amino Acid	Leucine, Isoleucine and Valine Metabolism	0.07206	-0.133, 0.277	0.476933	0.7912
100020514	N-acetyltheanine	Xenobiotics	Food Component/Plant	-0.189659	-0.73, 0.351	0.477874	0.7912
100000711	4-acetylphenol sulfate	Xenobiotics	Benzoate Metabolism	-0.230063	-0.893, 0.433	0.482385	0.792489
100000802	acetylcarnitine (C2)	Lipid	Fatty Acid Metabolism (Acyl Carnitine, Short Chain)	-0.047867	-0.186, 0.09	0.481721	0.792489
796	alpha-ketobutyrate	Amino Acid	Methionine, Cysteine, SAM and Taurine Metabolism	-0.167072	-0.648, 0.314	0.481848	0.792489
100001296	stachydrine	Xenobiotics	Food Component/Plant	0.136422	-0.256, 0.529	0.481916	0.792489
100006294	behenoyl sphingomyelin (d18:1/22:0)*	Lipid	Sphingomyelins	-0.033423	-0.13, 0.063	0.484039	0.792895
815	tyrosine	Amino Acid	Tyrosine Metabolism	0.037268	-0.07, 0.145	0.483614	0.792895
100009008	1-(1-enyl-palmitoyl)-2-docosahexaenoyl-GPC (P-16:0/22:6)*	Lipid	Plasmalogen	-0.028417	-0.111, 0.054	0.487405	0.795368
1102	gamma-glutamyltyrosine	Peptide	Gamma-glutamyl Amino Acid	0.094341	-0.181, 0.37	0.488606	0.795368
100020417	N6,N6-dimethyllysine	Amino Acid	Lysine Metabolism	0.050773	-0.097, 0.199	0.487112	0.795368
100003415	N6-methyllysine	Amino Acid	Lysine Metabolism	-0.021087	-0.083, 0.041	0.489077	0.795368
445	orotate	Nucleotide	Pyrimidine Metabolism, Orotate containing	0.041964	-0.08, 0.164	0.487702	0.795368
100009036	1-margaroyl-2-oleoyl-GPC (17:0/18:1)*	Lipid	Phosphatidylcholine (PC)	-0.060533	-0.238, 0.117	0.490971	0.79615
100001412	N2,N2-dimethylguanosine	Nucleotide	Purine Metabolism, Guanine containing	-0.023309	-0.092, 0.045	0.490419	0.79615
100009134	1-palmityl-2-linoleoyl-GPC (O-16:0/18:2)*	Lipid	Plasmalogen	-0.055045	-0.218, 0.108	0.493633	0.796364
100020361	3-amino-2-piperidone	Amino Acid	Urea cycle; Arginine and Proline Metabolism	0.059888	-0.117, 0.237	0.493929	0.796364
100002514	hydantoin-5-propionate	Amino Acid	Histidine Metabolism	0.070023	-0.136, 0.276	0.492415	0.796364
100006627	suberoylcarnitine (C8-DC)	Lipid	Fatty Acid Metabolism (Acyl Carnitine, Dicarboxylate)	-0.131225	-0.519, 0.256	0.493141	0.796364
100001359	aconitate [cis or trans]	Energy	TCA Cycle	-0.026968	-0.107, 0.053	0.494664	0.796408
100021457	(2-butoxyethoxy)acetic acid	Xenobiotics	Chemical	0.166243	-0.33, 0.663	0.497965	0.798972
100003926	(R)-3-hydroxybutyrylcarnitine	Lipid	Fatty Acid Metabolism (Acyl Carnitine, Hydroxy)	-0.138204	-0.552, 0.275	0.498571	0.798972
100001384	1-arachidoyl-GPC (20:0)	Lipid	Lysophospholipid	0.065566	-0.131, 0.262	0.499489	0.798972
100009124	1-margaroyl-2-arachidonoyl-GPC (17:0/20:4)*	Lipid	Phosphatidylcholine (PC)	-0.028001	-0.112, 0.056	0.500387	0.798972
100008914	1-palmitoyl-2-arachidonoyl-GPC (16:0/20:4n6)	Lipid	Phosphatidylcholine (PC)	-0.043163	-0.173, 0.087	0.50051	0.798972
279	cystine	Amino Acid	Methionine, Cysteine, SAM and Taurine Metabolism	0.177284	-0.352, 0.706	0.497707	0.798972
100002951	eicosanedioate (C20-DC)	Lipid	Fatty Acid, Dicarboxylate	0.316713	-0.644, 1.278	0.504628	0.804407
100001081	2-pyrrolidinone	Amino Acid	Glutamate Metabolism	0.087373	-0.18, 0.354	0.507503	0.804439
71	5-hydroxyindoleacetate	Amino Acid	Tryptophan Metabolism	0.092753	-0.19, 0.376	0.506821	0.804439
100001127	pyroglutamylglycine	Peptide	Modified Peptides	-0.102049	-0.413, 0.208	0.505783	0.804439
100006293	sphingomyelin (d18:1/20:2, d18:2/20:1, d16:1/22:2)*	Lipid	Sphingomyelins	0.045785	-0.094, 0.185	0.506086	0.804439
100002029	androstenediol (3beta,17beta) monosulfate (2)	Lipid	Androgenic Steroids	-0.244599	-1.003, 0.513	0.513555	0.808651
234	aspartate	Amino Acid	Alanine and Aspartate Metabolism	0.047157	-0.099, 0.193	0.513748	0.808651
100004635	methionine sulfone	Amino Acid	Methionine, Cysteine, SAM and Taurine Metabolism	0.02758	-0.058, 0.113	0.511699	0.808651
100015846	nervonoylcarnitine (C24:1)*	Lipid	Fatty Acid Metabolism (Acyl Carnitine, Monounsaturated)	-0.036286	-0.149, 0.076	0.513673	0.808651
313	sphinganine	Lipid	Sphingolipid Synthesis	0.103681	-0.217, 0.425	0.513317	0.808651
100001313	gamma-glutamylmethionine	Peptide	Gamma-glutamyl Amino Acid	0.040464	-0.085, 0.166	0.515052	0.809573
100006642	glycodeoxycholate 3-sulfate	Lipid	Secondary Bile Acid Metabolism	0.378864	-0.802, 1.56	0.515958	0.809866
244	beta-alanine	Nucleotide	Pyrimidine Metabolism, Uracil containing	-0.071167	-0.294, 0.151	0.516895	0.810209
100004509	S-allylcysteine	Xenobiotics	Food Component/Plant	-0.24975	-1.033, 0.534	0.518575	0.811714
100008916	1-stearoyl-2-docosahexaenoyl-GPC (18:0/22:6)	Lipid	Phosphatidylcholine (PC)	0.028269	-0.061, 0.117	0.519698	0.812344
100022003	bilirubin degradation product, C16H18N2O5 (1)**	Partially Characterized Molecules	Partially Characterized Molecules	0.095795	-0.207, 0.399	0.522399	0.814605
100001295	gamma-glutamyltryptophan	Peptide	Gamma-glutamyl Amino Acid	0.051657	-0.112, 0.215	0.522591	0.814605
100022127	tetrahydrocortisone glucuronide (5)	Lipid	Corticosteroids	-0.064074	-0.268, 0.14	0.524036	0.81573
444	ornithine	Amino Acid	Urea cycle; Arginine and Proline Metabolism	0.038325	-0.084, 0.161	0.527419	0.819864
100021728	cis-3,4-methyleneheptanoylcarnitine	Lipid	Fatty Acid Metabolism (Acyl Carnitine, Medium Chain)	-0.092644	-0.39, 0.205	0.528338	0.82016
100000054	5-hydroxylysine	Amino Acid	Lysine Metabolism	0.0386	-0.086, 0.163	0.52983	0.821346
100002113	cysteine sulfinic acid	Amino Acid	Methionine, Cysteine, SAM and Taurine Metabolism	-0.049411	-0.21, 0.111	0.532358	0.822294
100010940	diacylglycerol (16:1/18:2 [2], 16:0/18:3 [1])*	Lipid	Diacylglycerol	-0.412467	-1.752, 0.927	0.532779	0.822294
100009406	palmitoleoylcarnitine (C16:1)*	Lipid	Fatty Acid Metabolism (Acyl Carnitine, Monounsaturated)	0.057064	-0.128, 0.243	0.53336	0.822294
100000299	xanthosine	Nucleotide	Purine Metabolism, (Hypo)Xanthine/Inosine containing	-0.191822	-0.814, 0.43	0.532106	0.822294
100002259	cis-4-decenoylcarnitine (C10:1)	Lipid	Fatty Acid Metabolism (Acyl Carnitine, Monounsaturated)	-0.059701	-0.254, 0.135	0.534504	0.822931
100006082	4-hydroxychlorothalonil	Xenobiotics	Chemical	-0.037674	-0.161, 0.085	0.535376	0.82315
100005946	2-keto-3-deoxy-gluconate	Xenobiotics	Food Component/Plant	-0.02015	-0.086, 0.046	0.536708	0.824074
100003119	N-oleoyltaurine	Lipid	Endocannabinoid	-0.068576	-0.294, 0.157	0.537541	0.82423
100001876	sphinganine-1-phosphate	Lipid	Sphingolipid Synthesis	0.070334	-0.161, 0.302	0.538301	0.824273
100006375	3-methoxycatechol sulfate (1)	Xenobiotics	Benzoate Metabolism	0.346485	-0.8, 1.493	0.540528	0.82656
100001743	tryptophan betaine	Amino Acid	Tryptophan Metabolism	0.020565	-0.048, 0.089	0.543546	0.83005
100006367	3-hydroxyhexanoate	Lipid	Fatty Acid, Monohydroxy	-0.076816	-0.335, 0.181	0.546503	0.833435
482	lactate	Carbohydrate	Glycolysis, Gluconeogenesis, and Pyruvate Metabolism	-0.048158	-0.211, 0.114	0.54829	0.835031
100002500	formiminoglutamate	Amino Acid	Histidine Metabolism	-0.060018	-0.263, 0.143	0.549921	0.836384
55	1-methylnicotinamide	Cofactors and Vitamins	Nicotinate and Nicotinamide Metabolism	-0.075146	-0.332, 0.182	0.553098	0.837825
100004414	2-hydroxyphytanate*	Lipid	Fatty Acid, Branched	-0.165426	-0.73, 0.399	0.552766	0.837825
100001274	N-acetylthreonine	Amino Acid	Glycine, Serine and Threonine Metabolism	-0.082344	-0.363, 0.198	0.552218	0.837825
391	citrulline	Amino Acid	Urea cycle; Arginine and Proline Metabolism	0.037241	-0.091, 0.165	0.555974	0.838965
100019975	hexadecenedioate (C16:1-DC)*	Lipid	Fatty Acid, Dicarboxylate	0.078979	-0.192, 0.35	0.555257	0.838965
100000463	indolelactate	Amino Acid	Tryptophan Metabolism	0.03747	-0.092, 0.166	0.556084	0.838965
272	corticosterone	Lipid	Corticosteroids	-0.180595	-0.806, 0.445	0.55859	0.841261
100009335	dihomo-linolenoyl-choline	Lipid	Fatty Acid Metabolism (Acyl Choline)	0.118631	-0.293, 0.53	0.559099	0.841261
100001383	1-myristoyl-GPC (14:0)	Lipid	Lysophospholipid	-0.045662	-0.205, 0.114	0.56234	0.842762
100001786	1-palmitoleoyl-GPI (16:1)*	Lipid	Lysophospholipid	0.144703	-0.361, 0.65	0.561811	0.842762
100009067	1-stearoyl-2-docosahexaenoyl-GPI (18:0/22:6)*	Lipid	Phosphatidylinositol (PI)	0.077634	-0.193, 0.349	0.561701	0.842762
100002849	ethyl glucuronide	Xenobiotics	Chemical	-0.224183	-1.02, 0.572	0.568249	0.849231
100001254	N-acetyltryptophan	Amino Acid	Tryptophan Metabolism	-0.077104	-0.351, 0.197	0.568094	0.849231
100010916	palmitoyl-oleoyl-glycerol (16:0/18:1) [1]*	Lipid	Diacylglycerol	0.154283	-0.395, 0.704	0.569239	0.849231
100021104	pregnenetriol disulfate*	Lipid	Pregnenolone Steroids	0.21308	-0.547, 0.973	0.56967	0.849231
100008993	1-palmitoyl-2-arachidonoyl-GPI (16:0/20:4)*	Lipid	Phosphatidylinositol (PI)	0.036998	-0.097, 0.171	0.574347	0.852001
1113	4-acetamidobutanoate	Amino Acid	Polyamine Metabolism	0.040154	-0.105, 0.185	0.575309	0.852001
275	creatinine	Amino Acid	Creatine Metabolism	0.014831	-0.039, 0.068	0.575042	0.852001
100015759	stearoylcholine*	Lipid	Fatty Acid Metabolism (Acyl Choline)	0.109755	-0.287, 0.506	0.574753	0.852001
1668	taurodeoxycholate	Lipid	Secondary Bile Acid Metabolism	-0.188742	-0.867, 0.49	0.57297	0.852001
100009375	1-linoleoyl-2-docosapentaenyol-GPC (18:2/22:5n3)*	Lipid	Phosphatidylcholine (PC)	0.138272	-0.365, 0.641	0.577306	0.852719
878	fructose	Carbohydrate	Fructose, Mannose and Galactose Metabolism	-0.027604	-0.128, 0.073	0.577284	0.852719
100002167	12-HETE	Lipid	Eicosanoid	0.164558	-0.44, 0.769	0.580901	0.853553
100001193	adrenate (22:4n6)	Lipid	Long Chain Polyunsaturated Fatty Acid (n3 and n6)	-0.074375	-0.347, 0.198	0.579954	0.853553
100001315	p-cresol sulfate	Xenobiotics	Benzoate Metabolism	0.129408	-0.346, 0.604	0.580698	0.853553
512	taurine	Amino Acid	Methionine, Cysteine, SAM and Taurine Metabolism	0.048192	-0.128, 0.224	0.579122	0.853553
100019794	hydroxy-CMPF*	Lipid	Fatty Acid, Dicarboxylate	0.040593	-0.109, 0.191	0.583121	0.8557
182	quinolinate	Cofactors and Vitamins	Nicotinate and Nicotinamide Metabolism	0.030128	-0.082, 0.142	0.584533	0.856656
100020227	pyroglutamylalanine*	Peptide	Modified Peptides	0.078379	-0.215, 0.372	0.58784	0.860384
100015967	carotene diol (2)	Cofactors and Vitamins	Vitamin A Metabolism	-0.047083	-0.224, 0.13	0.590527	0.863195
100001655	1-palmitoyl-GPI (16:0)	Lipid	Lysophospholipid	0.089875	-0.255, 0.435	0.597045	0.867101
100006759	cyclo(met-pro)	Peptide	Dipeptide	-0.074939	-0.362, 0.212	0.596394	0.867101
100000792	dehydroepiandrosterone sulfate (DHEA-S)	Lipid	Androgenic Steroids	0.06002	-0.17, 0.29	0.596619	0.867101
100004328	sphingomyelin (d18:1/14:0, d16:1/16:0)*	Lipid	Sphingomyelins	-0.015814	-0.076, 0.045	0.595358	0.867101
100006092	tyramine O-sulfate	Amino Acid	Tyrosine Metabolism	-0.127856	-0.617, 0.362	0.596398	0.867101
100006105	4-methylguaiacol sulfate	Xenobiotics	Benzoate Metabolism	-0.177318	-0.863, 0.508	0.600096	0.867221
811	alanine	Amino Acid	Alanine and Aspartate Metabolism	-0.023478	-0.115, 0.068	0.600976	0.867221
100020822	dihydrocaffeate sulfate (2)	Xenobiotics	Food Component/Plant	0.170612	-0.487, 0.829	0.599097	0.867221
100020241	gamma-glutamylcitrulline*	Peptide	Gamma-glutamyl Amino Acid	-0.098809	-0.48, 0.283	0.599594	0.867221
823	pyruvate	Carbohydrate	Glycolysis, Gluconeogenesis, and Pyruvate Metabolism	0.053019	-0.152, 0.258	0.600529	0.867221
572	glucose	Carbohydrate	Glycolysis, Gluconeogenesis, and Pyruvate Metabolism	-0.010193	-0.05, 0.03	0.602837	0.867685
1084	N-acetylvaline	Amino Acid	Leucine, Isoleucine and Valine Metabolism	-0.039103	-0.191, 0.113	0.602394	0.867685
100002021	5alpha-androstan-3beta,17alpha-diol disulfate	Lipid	Androgenic Steroids	0.135572	-0.395, 0.666	0.604428	0.867759
100009232	thioproline	Xenobiotics	Chemical	0.033655	-0.098, 0.165	0.604397	0.867759
100022013	tetrahydrocortisol glucuronide	Lipid	Corticosteroids	-0.074293	-0.366, 0.218	0.605701	0.86848
100001108	3-methylxanthine	Xenobiotics	Xanthine Metabolism	0.357416	-1.053, 1.768	0.607335	0.869717
100015596	1-(1-enyl-stearoyl)-2-docosapentaenoyl-GPE (P-18:0/22:5n3)*	Lipid	Plasmalogen	-0.03782	-0.19, 0.114	0.614497	0.870188
100009126	1-arachidoyl-2-arachidonoyl-GPC (20:0/20:4)*	Lipid	Phosphatidylcholine (PC)	-0.037247	-0.187, 0.113	0.614256	0.870188
100005350	1-linolenoyl-GPC (18:3)*	Lipid	Lysophospholipid	-0.048737	-0.245, 0.147	0.61441	0.870188
100009037	1-margaroyl-2-linoleoyl-GPC (17:0/18:2)*	Lipid	Phosphatidylcholine (PC)	-0.04632	-0.234, 0.141	0.616794	0.870188
100002070	2-hydroxyglutarate	Lipid	Fatty Acid, Dicarboxylate	-0.056176	-0.284, 0.172	0.617717	0.870188
100021727	cis-3,4-methyleneheptanoate	Lipid	Fatty Acid, Branched	-0.131899	-0.657, 0.393	0.61066	0.870188
1221	creatine	Amino Acid	Creatine Metabolism	0.077995	-0.241, 0.397	0.620019	0.870188
100010901	gamma-glutamyl-alpha-lysine	Peptide	Gamma-glutamyl Amino Acid	0.028355	-0.087, 0.143	0.616894	0.870188
100020262	glutamine conjugate of C6H10O2 (2)*	Partially Characterized Molecules	Partially Characterized Molecules	-0.100247	-0.509, 0.308	0.6185	0.870188
100021123	hydroxy-N6,N6,N6-trimethyllysine*	Amino Acid	Lysine Metabolism	-0.042996	-0.216, 0.13	0.613586	0.870188
100021065	lactobacillic acid	Xenobiotics	Bacterial/Fungal	-0.125476	-0.623, 0.372	0.608891	0.870188
100010928	linoleoyl-docosahexaenoyl-glycerol (18:2/22:6) [1]*	Lipid	Diacylglycerol	-0.160051	-0.811, 0.491	0.618082	0.870188
461	phosphate	Energy	Oxidative Phosphorylation	-0.0184	-0.092, 0.055	0.613529	0.870188
504	serotonin	Amino Acid	Tryptophan Metabolism	0.194288	-0.6, 0.988	0.619709	0.870188
100015790	sphingomyelin (d18:2/21:0, d16:2/23:0)*	Lipid	Sphingomyelins	0.018558	-0.057, 0.094	0.61611	0.870188
100002254	stearoyl ethanolamide	Lipid	Endocannabinoid	-0.031926	-0.16, 0.096	0.613501	0.870188
100000924	1-oleoylglycerol (18:1)	Lipid	Monoacylglycerol	-0.139423	-0.712, 0.434	0.621686	0.870582
100001605	catechol sulfate	Xenobiotics	Benzoate Metabolism	0.109396	-0.34, 0.559	0.621844	0.870582
100000976	glycylproline	Peptide	Dipeptide	0.169914	-0.531, 0.87	0.622768	0.870794
100020833	2-ketocaprylate	Amino Acid	Leucine, Isoleucine and Valine Metabolism	0.089523	-0.282, 0.461	0.624815	0.872308
100001416	orotidine	Nucleotide	Pyrimidine Metabolism, Orotate containing	-0.028085	-0.145, 0.089	0.625399	0.872308
100009135	1-(1-enyl-stearoyl)-2-linoleoyl-GPC (P-18:0/18:2)*	Lipid	Plasmalogen	-0.029363	-0.156, 0.097	0.636922	0.873126
100002871	1-adrenoyl-GPC (22:4)*	Lipid	Lysophospholipid	0.035113	-0.114, 0.185	0.633728	0.873126
100009123	1-pentadecanoyl-2-docosahexaenoyl-GPC (15:0/22:6)*	Lipid	Phosphatidylcholine (PC)	0.031337	-0.102, 0.165	0.633264	0.873126
100009181	1-stearoyl-2-oleoyl-GPI (18:0/18:1)*	Lipid	Phosphatidylinositol (PI)	-0.034208	-0.18, 0.112	0.634395	0.873126
100021136	3-decenoylcarnitine	Lipid	Fatty Acid Metabolism (Acyl Carnitine, Monounsaturated)	0.102445	-0.339, 0.544	0.637607	0.873126
100000036	3-methyl-2-oxovalerate	Amino Acid	Leucine, Isoleucine and Valine Metabolism	0.028052	-0.093, 0.149	0.637128	0.873126
1021	5-oxoproline	Amino Acid	Glutathione Metabolism	-0.039961	-0.211, 0.131	0.634548	0.873126
100001810	dimethylarginine (SDMA + ADMA)	Amino Acid	Urea cycle; Arginine and Proline Metabolism	0.024478	-0.08, 0.129	0.635013	0.873126
100001126	gamma-glutamylvaline	Peptide	Gamma-glutamyl Amino Acid	-0.040036	-0.209, 0.129	0.630379	0.873126
1628	glycochenodeoxycholate	Lipid	Primary Bile Acid Metabolism	0.210651	-0.68, 1.101	0.631332	0.873126
355	histidine	Amino Acid	Histidine Metabolism	-0.042223	-0.223, 0.139	0.635738	0.873126
100001392	laurylcarnitine (C12)	Lipid	Fatty Acid Metabolism (Acyl Carnitine, Medium Chain)	-0.056011	-0.296, 0.184	0.636028	0.873126
418	methylmalonate (MMA)	Lipid	Fatty Acid Metabolism (also BCAA Metabolism)	0.029845	-0.097, 0.157	0.634204	0.873126
100004329	sphingomyelin (d18:2/16:0, d18:1/16:1)*	Lipid	Sphingomyelins	0.018448	-0.061, 0.098	0.636538	0.873126
825	uracil	Nucleotide	Pyrimidine Metabolism, Uracil containing	-0.040191	-0.212, 0.131	0.634562	0.873126
100008956	sphingomyelin (d18:2/23:0, d18:1/23:1, d17:1/24:1)*	Lipid	Sphingomyelins	0.014629	-0.049, 0.078	0.638686	0.873542
100002196	13-HODE + 9-HODE	Lipid	Fatty Acid, Monohydroxy	-0.111939	-0.601, 0.377	0.642472	0.874614
100001873	1-stearoyl-2-docosahexaenoyl-GPS (18:0/22:6)*	Lipid	Phosphatidylserine (PS)	0.105219	-0.363, 0.574	0.648608	0.874614
100009142	1-stearoyl-2-docosapentaenoyl-GPC (18:0/22:5n6)*	Lipid	Phosphatidylcholine (PC)	-0.0396	-0.215, 0.135	0.646073	0.874614
100001554	2-arachidonoyl-GPC (20:4)*	Lipid	Lysophospholipid	-0.051241	-0.275, 0.173	0.64262	0.874614
100010895	2'-O-methylcytidine	Nucleotide	Pyrimidine Metabolism, Cytidine containing	0.051797	-0.176, 0.28	0.644747	0.874614
1141	4-hydroxyphenylpyruvate	Amino Acid	Tyrosine Metabolism	0.028763	-0.1, 0.157	0.649391	0.874614
100003627	aspartylaspartate	Peptide	Dipeptide	0.056232	-0.19, 0.303	0.64348	0.874614
100015737	ceramide (d18:1/17:0, d17:1/18:0)*	Lipid	Ceramides	0.029269	-0.101, 0.159	0.647292	0.874614
100001485	gamma-glutamylisoleucine*	Peptide	Gamma-glutamyl Amino Acid	-0.029827	-0.16, 0.1	0.641788	0.874614
100001279	hyocholate	Lipid	Secondary Bile Acid Metabolism	0.088584	-0.308, 0.485	0.650334	0.874614
432	nicotinamide	Cofactors and Vitamins	Nicotinate and Nicotinamide Metabolism	-0.074195	-0.404, 0.256	0.648033	0.874614
100010955	perfluorooctanesulfonate (PFOS)	Xenobiotics	Chemical	0.012478	-0.043, 0.068	0.646393	0.874614
100015591	phosphatidylcholine (16:0/20:4n3; 18:1/18:3n6)*	Lipid	Phosphatidylcholine (PC)	-0.079975	-0.438, 0.278	0.650024	0.874614
1004	xanthine	Nucleotide	Purine Metabolism, (Hypo)Xanthine/Inosine containing	-0.033219	-0.182, 0.115	0.649805	0.874614
100009045	phenylacetylglutamate	Peptide	Acetylated Peptides	0.132684	-0.463, 0.728	0.651161	0.874682
100009130	1-oleoyl-2-docosahexaenoyl-GPC (18:1/22:6)*	Lipid	Phosphatidylcholine (PC)	0.034439	-0.122, 0.191	0.654349	0.875832
100002102	N-acetyl-beta-alanine	Nucleotide	Pyrimidine Metabolism, Uracil containing	0.040237	-0.142, 0.222	0.653936	0.875832
100009054	palmitoleoyl-oleoyl-glycerol (16:1/18:1) [2]*	Lipid	Diacylglycerol	0.116358	-0.41, 0.642	0.653553	0.875832
100015882	glycosyl ceramide (d18:1/20:0, d16:1/22:0)*	Lipid	Hexosylceramides (HCER)	0.015446	-0.055, 0.086	0.655461	0.87628
1268	gamma-glutamylleucine	Peptide	Gamma-glutamyl Amino Acid	0.023595	-0.084, 0.131	0.657071	0.877393
100009407	pimeloylcarnitine/3-methyladipoylcarnitine (C7-DC)	Lipid	Fatty Acid Metabolism (Acyl Carnitine, Dicarboxylate)	-0.055035	-0.308, 0.198	0.658475	0.878226
100001314	gamma-glutamylthreonine	Peptide	Gamma-glutamyl Amino Acid	0.036983	-0.135, 0.209	0.662115	0.882038
100020893	2,3-dihydroxy-5-methylthio-4-pentenoate (DMTPA)*	Amino Acid	Methionine, Cysteine, SAM and Taurine Metabolism	-0.017965	-0.102, 0.066	0.664001	0.882463
100001565	2-docosahexaenoyl-GPC (22:6)*	Lipid	Lysophospholipid	0.048727	-0.179, 0.276	0.663706	0.882463
100005850	3-methylglutarylcarnitine (2)	Amino Acid	Leucine, Isoleucine and Valine Metabolism	-0.038172	-0.218, 0.142	0.66682	0.885166
100002796	cis-4-decenoate (10:1n6)*	Lipid	Medium Chain Fatty Acid	0.117586	-0.445, 0.681	0.671636	0.89051
100001950	bilirubin (E,E)*	Cofactors and Vitamins	Hemoglobin and Porphyrin Metabolism	-0.054542	-0.318, 0.209	0.674252	0.892928
1526	1-palmitoyl-2-oleoyl-GPE (16:0/18:1)	Lipid	Phosphatidylethanolamine (PE)	0.03269	-0.128, 0.194	0.68028	0.898741
1002	allantoin	Nucleotide	Purine Metabolism, (Hypo)Xanthine/Inosine containing	-0.016747	-0.099, 0.066	0.679941	0.898741
100002253	cinnamoylglycine	Xenobiotics	Food Component/Plant	-0.114131	-0.679, 0.451	0.681622	0.898741
100001612	N-acetyl-aspartyl-glutamate (NAAG)	Amino Acid	Glutamate Metabolism	0.063801	-0.252, 0.38	0.681831	0.898741
100002199	tridecenedioate (C13:1-DC)*	Lipid	Fatty Acid, Dicarboxylate	0.099346	-0.395, 0.594	0.683486	0.89987
100000987	2-linoleoylglycerol (18:2)	Lipid	Monoacylglycerol	0.144279	-0.582, 0.871	0.68683	0.902257
100001456	7-methylguanine	Nucleotide	Purine Metabolism, Guanine containing	-0.014007	-0.085, 0.057	0.687831	0.902257
100022014	bilirubin degradation product, C16H18N2O5 (3)**	Partially Characterized Molecules	Partially Characterized Molecules	0.051801	-0.21, 0.314	0.688501	0.902257
100002094	gamma-CEHC	Cofactors and Vitamins	Tocopherol Metabolism	-0.049343	-0.298, 0.2	0.687477	0.902257
100008933	3-hydroxystearate	Lipid	Fatty Acid, Monohydroxy	-0.213984	-1.311, 0.883	0.692133	0.905963
100009021	1-palmityl-2-arachidonoyl-GPC (O-16:0/20:4)*	Lipid	Plasmalogen	-0.015948	-0.098, 0.066	0.693875	0.906927
100002537	4-hydroxy-2-oxoglutaric acid	Lipid	Fatty Acid, Dicarboxylate	-0.040525	-0.25, 0.169	0.694479	0.906927
100009179	1-palmitoyl-2-docosahexaenoyl-GPI (16:0/22:6)*	Lipid	Phosphatidylinositol (PI)	0.049256	-0.207, 0.305	0.696132	0.908033
100002390	4-methylbenzenesulfonate	Xenobiotics	Chemical	-0.039969	-0.249, 0.169	0.697759	0.909103
100005714	1-linolenoyl-GPE (18:3)*	Lipid	Lysophospholipid	0.064792	-0.278, 0.408	0.701506	0.911134
100008984	1-palmitoyl-2-palmitoleoyl-GPC (16:0/16:1)*	Lipid	Phosphatidylcholine (PC)	-0.032208	-0.205, 0.14	0.704358	0.911134
100006363	daidzein sulfate (2)	Xenobiotics	Food Component/Plant	0.103923	-0.452, 0.66	0.70426	0.911134
100002376	dexpanthenol	Xenobiotics	Chemical	0.157661	-0.687, 1.003	0.704816	0.911134
100015851	docosapentaenoylcarnitine (C22:5n3)*	Lipid	Fatty Acid Metabolism (Acyl Carnitine, Polyunsaturated)	0.056598	-0.247, 0.36	0.704672	0.911134
100001733	hexanoylglutamine	Lipid	Fatty Acid Metabolism (Acyl Glutamine)	-0.077846	-0.494, 0.338	0.703897	0.911134
1492	linoleamide (18:2n6)	Lipid	Fatty Acid, Amide	-0.089838	-0.573, 0.393	0.705708	0.911134
100021093	taurochenodeoxycholic acid 3-sulfate	Lipid	Secondary Bile Acid Metabolism	0.126344	-0.553, 0.806	0.705785	0.911134
100009003	1-(1-enyl-oleoyl)-2-linoleoyl-GPE (P-18:1/18:2)*	Lipid	Lysoplasmalogen	-0.114302	-0.81, 0.581	0.738497	0.911937
100008917	1-(1-enyl-stearoyl)-2-oleoyl-GPC (P-18:0/18:1)	Lipid	Plasmalogen	-0.014496	-0.096, 0.067	0.718843	0.911937
100001654	1-arachidonoyl-GPI (20:4)*	Lipid	Lysophospholipid	0.034145	-0.154, 0.223	0.712857	0.911937
100004552	1-eicosapentaenoyl-GPE (20:5)*	Lipid	Lysophospholipid	0.033211	-0.161, 0.227	0.728177	0.911937
100009397	1-linoleoyl-2-eicosapentaenoyl-GPC (18:2/20:5)*	Lipid	Phosphatidylcholine (PC)	0.051183	-0.27, 0.372	0.74613	0.911937
100009361	1-oleoyl-2-docosapentaenoyl-GPC (18:1/22:5n6)*	Lipid	Phosphatidylcholine (PC)	-0.071101	-0.456, 0.314	0.70798	0.911937
100016005	1-oleyl-2-linoleoyl-GPC (O-18:1/18:2)*	Lipid	Plasmalogen	0.044141	-0.212, 0.301	0.726639	0.911937
1537	1-palmitoyl-2-linoleoyl-GPC (16:0/18:2)	Lipid	Phosphatidylcholine (PC)	-0.017796	-0.118, 0.083	0.719555	0.911937
100001870	1-palmitoyl-2-linoleoyl-GPE (16:0/18:2)	Lipid	Phosphatidylethanolamine (PE)	0.025346	-0.133, 0.184	0.745681	0.911937
100009019	1-stearyl-2-arachidonoyl-GPC (O-18:0/20:4)*	Lipid	Plasmalogen	0.02253	-0.114, 0.159	0.737351	0.911937
100020373	2,2'-methylenebis(6-tert-butyl-p-cresol)	Xenobiotics	Chemical	0.093288	-0.489, 0.675	0.744743	0.911937
100015637	2-hydroxybehenate	Lipid	Fatty Acid, Monohydroxy	-0.098822	-0.713, 0.515	0.743871	0.911937
100020515	2-naphthol sulfate	Xenobiotics	Chemical	-0.038263	-0.271, 0.194	0.73826	0.911937
100001426	3-(3-amino-3-carboxypropyl)uridine*	Nucleotide	Pyrimidine Metabolism, Uracil containing	0.025627	-0.134, 0.185	0.744664	0.911937
100021324	3,5-dichloro-2,6-dihydroxybenzoic acid	Xenobiotics	Chemical	0.009825	-0.052, 0.071	0.745274	0.911937
100006370	3beta-hydroxy-5-cholestenoate	Lipid	Sterol	0.02156	-0.102, 0.145	0.723852	0.911937
100001170	3-hydroxy-2-ethylpropionate	Amino Acid	Leucine, Isoleucine and Valine Metabolism	-0.0772	-0.507, 0.353	0.715542	0.911937
100001454	3-hydroxydodecanedioate*	Lipid	Fatty Acid, Dicarboxylate	-0.083081	-0.559, 0.393	0.723245	0.911937
100001145	3-hydroxysebacate	Lipid	Fatty Acid, Monohydroxy	-0.09494	-0.669, 0.479	0.737026	0.911937
100004499	6-oxopiperidine-2-carboxylate	Amino Acid	Lysine Metabolism	0.075817	-0.375, 0.527	0.732944	0.911937
1442	beta-hydroxyisovalerate	Amino Acid	Leucine, Isoleucine and Valine Metabolism	0.076779	-0.387, 0.541	0.736812	0.911937
100022004	bilirubin degradation product, C16H18N2O5 (2)**	Partially Characterized Molecules	Partially Characterized Molecules	0.041284	-0.194, 0.276	0.721149	0.911937
100022008	bilirubin degradation product, C17H20N2O5 (1)**	Partially Characterized Molecules	Partially Characterized Molecules	0.061443	-0.277, 0.399	0.712035	0.911937
100021374	branched chain 14:0 dicarboxylic acid**	Lipid	Fatty Acid, Dicarboxylate	0.116051	-0.579, 0.811	0.73448	0.911937
100021015	branched-chain fatty acid 18:0 (2)**	Lipid	Fatty Acid, Branched	-0.056536	-0.373, 0.26	0.71666	0.911937
267	choline phosphate	Lipid	Phospholipid Metabolism	0.029094	-0.133, 0.191	0.715372	0.911937
100001437	cysteine-glutathione disulfide	Amino Acid	Glutathione Metabolism	0.108278	-0.522, 0.738	0.727159	0.911937
923	dihydroorotate	Nucleotide	Pyrimidine Metabolism, Orotate containing	-0.051488	-0.335, 0.232	0.71242	0.911937
100001002	EDTA	Xenobiotics	Chemical	0.009417	-0.045, 0.064	0.726645	0.911937
100009336	eicosapentaenoylcholine	Lipid	Fatty Acid Metabolism (Acyl Choline)	0.060032	-0.311, 0.431	0.74231	0.911937
100001335	eicosenoate (20:1)	Lipid	Long Chain Monounsaturated Fatty Acid	-0.064804	-0.423, 0.293	0.713446	0.911937
100005403	etiocholanolone glucuronide	Lipid	Androgenic Steroids	-0.1074	-0.783, 0.568	0.746696	0.911937
327	flavin adenine dinucleotide (FAD)	Cofactors and Vitamins	Riboflavin Metabolism	-0.037747	-0.273, 0.198	0.744529	0.911937
100002679	gamma-carboxyglutamate	Amino Acid	Glutamate Metabolism	-0.020173	-0.143, 0.102	0.738411	0.911937
100015751	glycosyl ceramide (d18:1/23:1, d17:1/24:1)*	Lipid	Hexosylceramides (HCER)	0.099324	-0.509, 0.707	0.740072	0.911937
100001212	guanidinosuccinate	Amino Acid	Guanidino and Acetamido Metabolism	0.037479	-0.179, 0.254	0.724939	0.911937
100000708	isovalerate (i5:0)	Amino Acid	Leucine, Isoleucine and Valine Metabolism	-0.081409	-0.558, 0.395	0.728681	0.911937
100010922	linoleoyl-arachidonoyl-glycerol (18:2/20:4) [1]*	Lipid	Diacylglycerol	0.034707	-0.182, 0.251	0.744863	0.911937
100000276	maltotriose	Carbohydrate	Glycogen Metabolism	0.180082	-0.817, 1.177	0.713833	0.911937
100022475	menthol glucuronide	Xenobiotics	Food Component/Plant	0.098417	-0.445, 0.641	0.712886	0.911937
100001734	N6-acetyllysine	Amino Acid	Lysine Metabolism	0.023506	-0.119, 0.166	0.738385	0.911937
100001256	N-acetylphenylalanine	Amino Acid	Phenylalanine Metabolism	-0.039197	-0.252, 0.174	0.709023	0.911937
194	N-formylmethionine	Amino Acid	Methionine, Cysteine, SAM and Taurine Metabolism	0.023345	-0.117, 0.164	0.735729	0.911937
100002107	palmitoyl sphingomyelin (d18:1/16:0)	Lipid	Sphingomyelins	0.007047	-0.036, 0.05	0.737474	0.911937
100010925	palmitoyl-arachidonoyl-glycerol (16:0/20:4) [2]*	Lipid	Diacylglycerol	-0.070318	-0.466, 0.325	0.718052	0.911937
100010917	palmitoyl-oleoyl-glycerol (16:0/18:1) [2]*	Lipid	Diacylglycerol	0.079057	-0.364, 0.522	0.717011	0.911937
100003470	pregnanediol-3-glucuronide	Lipid	Progestin Steroids	0.06949	-0.317, 0.456	0.715308	0.911937
491	pyridoxal	Cofactors and Vitamins	Vitamin B6 Metabolism	-0.017415	-0.116, 0.082	0.720834	0.911937
1648	taurocholate	Lipid	Primary Bile Acid Metabolism	-0.135883	-0.952, 0.681	0.73539	0.911937
100000784	theanine	Xenobiotics	Food Component/Plant	0.156638	-0.829, 1.142	0.746866	0.911937
100009082	1-linoleoyl-GPA (18:2)*	Lipid	Lysophospholipid	-0.030161	-0.224, 0.164	0.752241	0.915525
100001178	3-carboxy-4-methyl-5-propyl-2-furanpropanoate (CMPF)	Lipid	Fatty Acid, Dicarboxylate	0.013422	-0.073, 0.1	0.752122	0.915525
100002397	alpha-ketoglutaramate*	Amino Acid	Glutamate Metabolism	0.014191	-0.077, 0.105	0.750932	0.915525
158	5,6-dihydrothymine	Nucleotide	Pyrimidine Metabolism, Thymine containing	-0.047568	-0.357, 0.262	0.75472	0.916266
100020493	glucuronide of piperine metabolite C17H21NO3 (5)*	Xenobiotics	Food Component/Plant	-0.131833	-0.99, 0.726	0.755039	0.916266
100006051	myristoleoylcarnitine (C14:1)*	Lipid	Fatty Acid Metabolism (Acyl Carnitine, Monounsaturated)	-0.042478	-0.32, 0.236	0.75631	0.916266
100015609	N-palmitoyl-sphingadienine (d18:2/16:0)*	Lipid	Ceramides	0.053697	-0.299, 0.406	0.756916	0.916266
100001391	stearoylcarnitine (C18)	Lipid	Fatty Acid Metabolism (Acyl Carnitine, Long Chain Saturated)	-0.015191	-0.115, 0.084	0.756286	0.916266
100006184	2-methoxyresorcinol sulfate	Xenobiotics	Chemical	0.143298	-0.821, 1.108	0.762789	0.922385
100015735	ceramide (d18:1/14:0, d16:1/16:0)*	Lipid	Ceramides	-0.060593	-0.475, 0.353	0.766225	0.924154
100001195	docosatrienoate (22:3n3)	Lipid	Long Chain Polyunsaturated Fatty Acid (n3 and n6)	0.136947	-0.801, 1.075	0.766712	0.924154
100008954	palmitoyl dihydrosphingomyelin (d18:0/16:0)*	Lipid	Dihydrosphingomyelins	-0.017745	-0.139, 0.103	0.766024	0.924154
100009075	1-palmitoleoyl-2-linoleoyl-GPC (16:1/18:2)*	Lipid	Phosphatidylcholine (PC)	0.024354	-0.146, 0.195	0.772134	0.925046
100008952	1-palmitoleoylglycerol (16:1)*	Lipid	Monoacylglycerol	-0.076528	-0.62, 0.467	0.774774	0.925046
100008921	1-palmitoyl-2-stearoyl-GPC (16:0/18:0)	Lipid	Phosphatidylcholine (PC)	0.015651	-0.095, 0.126	0.773666	0.925046
100006641	glycochenodeoxycholate 3-sulfate	Lipid	Primary Bile Acid Metabolism	0.146206	-0.893, 1.186	0.775122	0.925046
100000014	hippurate	Xenobiotics	Benzoate Metabolism	-0.063294	-0.514, 0.388	0.77566	0.925046
100021000	hydroxypalmitoyl sphingomyelin (d18:1/16:0(OH))**	Lipid	Sphingomyelins	0.017472	-0.104, 0.139	0.769967	0.925046
100022120	oxindolylalanine	Amino Acid	Tryptophan Metabolism	-0.021806	-0.174, 0.131	0.771559	0.925046
100015643	sphingadienine	Lipid	Sphingolipid Synthesis	-0.077918	-0.627, 0.471	0.773082	0.925046
100009025	sphingomyelin (d18:1/21:0, d17:1/22:0, d16:1/23:0)*	Lipid	Sphingomyelins	-0.011826	-0.096, 0.072	0.774571	0.925046
1135	ursodeoxycholate	Lipid	Secondary Bile Acid Metabolism	0.127978	-0.763, 1.019	0.770384	0.925046
100022009	bilirubin degradation product, C17H20N2O5 (2)**	Partially Characterized Molecules	Partially Characterized Molecules	0.062917	-0.391, 0.516	0.778035	0.925456
100001946	cyclo(gly-pro)	Peptide	Dipeptide	0.049085	-0.305, 0.403	0.77835	0.925456
100020759	heptadecenamide (17:1)*	Lipid	Fatty Acid, Amide	-0.028485	-0.236, 0.179	0.780109	0.925456
100022482	N-lactoyl phenylalanine	Amino Acid	Lactoyl Amino Acid	0.023595	-0.148, 0.195	0.780024	0.925456
100015836	ximenoylcarnitine (C26:1)*	Lipid	Fatty Acid Metabolism (Acyl Carnitine, Monounsaturated)	0.012188	-0.076, 0.101	0.779361	0.925456
100001851	N-acetylserine	Amino Acid	Glycine, Serine and Threonine Metabolism	-0.011114	-0.093, 0.071	0.783171	0.928111
100006361	dopamine 3-O-sulfate	Amino Acid	Tyrosine Metabolism	0.041728	-0.268, 0.351	0.78413	0.928272
100009030	lactosyl-N-palmitoyl-sphingosine (d18:1/16:0)	Lipid	Lactosylceramides (LCER)	0.020048	-0.132, 0.172	0.788571	0.931572
100020351	N-carbamoylvaline	Amino Acid	Leucine, Isoleucine and Valine Metabolism	0.046803	-0.308, 0.401	0.788555	0.931572
100001207	4-imidazoleacetate	Amino Acid	Histidine Metabolism	0.068266	-0.459, 0.595	0.792491	0.934244
310	cystathionine	Amino Acid	Methionine, Cysteine, SAM and Taurine Metabolism	-0.061208	-0.532, 0.41	0.791821	0.934244
100009066	1-palmitoyl-2-oleoyl-GPI (16:0/18:1)*	Lipid	Phosphatidylinositol (PI)	0.016528	-0.113, 0.146	0.794739	0.935915
100002488	isoursodeoxycholate	Lipid	Secondary Bile Acid Metabolism	0.071984	-0.509, 0.653	0.801197	0.941895
100006314	sphingomyelin (d17:1/16:0, d18:1/15:0, d16:1/17:0)*	Lipid	Sphingomyelins	-0.008653	-0.079, 0.061	0.801488	0.941895
2029	azelate (C9-DC)	Lipid	Fatty Acid, Dicarboxylate	-0.032644	-0.299, 0.234	0.803244	0.942975
100020225	1-(1-enyl-oleoyl)-2-docosahexaenoyl-GPC (P-18:1/22:6)*	Lipid	Plasmalogen	0.01118	-0.082, 0.105	0.808243	0.944907
100000743	2-hydroxyoctanoate	Lipid	Fatty Acid, Monohydroxy	0.041327	-0.304, 0.387	0.807869	0.944907
100003901	2-stearoyl-GPE (18:0)*	Lipid	Lysophospholipid	-0.115102	-1.069, 0.839	0.806379	0.944907
100006292	sphingomyelin (d18:1/20:1, d18:2/20:0)*	Lipid	Sphingomyelins	-0.008731	-0.082, 0.064	0.80822	0.944907
171	hypoxanthine	Nucleotide	Purine Metabolism, (Hypo)Xanthine/Inosine containing	0.037131	-0.281, 0.356	0.812725	0.949161
100010869	2,3-dihydroxy-2-methylbutyrate	Amino Acid	Leucine, Isoleucine and Valine Metabolism	0.057881	-0.444, 0.559	0.814562	0.949405
100021208	4-vinylcatechol sulfate	Xenobiotics	Benzoate Metabolism	-0.121172	-1.18, 0.938	0.816169	0.949405
1024	pantothenate	Cofactors and Vitamins	Pantothenate and CoA Metabolism	0.007883	-0.061, 0.076	0.815144	0.949405
564	threonine	Amino Acid	Glycine, Serine and Threonine Metabolism	0.009157	-0.071, 0.089	0.816733	0.949405
1134	urate	Nucleotide	Purine Metabolism, (Hypo)Xanthine/Inosine containing	0.016755	-0.13, 0.164	0.817145	0.949405
100001526	malonylcarnitine	Lipid	Fatty Acid Synthesis	0.027638	-0.218, 0.273	0.81882	0.950371
806	dimethylglycine	Amino Acid	Glycine, Serine and Threonine Metabolism	-0.009937	-0.1, 0.08	0.822884	0.954105
100009222	1-linoleoyl-2-arachidonoyl-GPE (18:2/20:4)*	Lipid	Phosphatidylethanolamine (PE)	-0.050031	-0.51, 0.409	0.824907	0.955467
100010937	oleoyl-arachidonoyl-glycerol (18:1/20:4) [2]*	Lipid	Diacylglycerol	-0.032228	-0.33, 0.265	0.825846	0.955573
100010919	oleoyl-oleoyl-glycerol (18:1/18:1) [2]*	Lipid	Diacylglycerol	0.042614	-0.357, 0.442	0.828291	0.956439
100006295	sphingomyelin (d18:1/22:1, d18:2/22:0, d16:1/24:1)*	Lipid	Sphingomyelins	-0.011662	-0.121, 0.098	0.828198	0.956439
100009145	1-palmitoyl-2-meadoyl-GPC (16:0/20:3n9)*	Lipid	Phosphatidylcholine (PC)	0.059732	-0.507, 0.626	0.830331	0.957813
100006005	5alpha-androstan-3alpha,17beta-diol monosulfate (2)	Lipid	Androgenic Steroids	-0.021427	-0.229, 0.187	0.83414	0.961223
100015914	1-lignoceroyl-2-arachidonoyl-GPC (24:0/20:4)*	Lipid	Phosphatidylcholine (PC)	0.045269	-0.403, 0.494	0.837503	0.961226
100000998	citramalate	Amino Acid	Glutamate Metabolism	-0.025434	-0.274, 0.223	0.835	0.961226
100015845	docosahexaenoylcarnitine (C22:6)*	Lipid	Fatty Acid Metabolism (Acyl Carnitine, Polyunsaturated)	-0.019144	-0.21, 0.171	0.838277	0.961226
100001415	N6-carbamoylthreonyladenosine	Nucleotide	Purine Metabolism, Adenine containing	0.015792	-0.142, 0.173	0.838408	0.961226
100015641	N-oleoylserine	Lipid	Endocannabinoid	-0.015279	-0.167, 0.136	0.837786	0.961226
100006374	1,2,3-benzenetriol sulfate (2)	Xenobiotics	Chemical	0.106784	-0.986, 1.2	0.842624	0.961832
100015594	1-stearoyl-2-adrenoyl-GPE (18:0/22:4)*	Lipid	Phosphatidylethanolamine (PE)	0.024286	-0.223, 0.272	0.841811	0.961832
100015638	2-hydroxynervonate*	Lipid	Fatty Acid, Monohydroxy	0.076079	-0.694, 0.847	0.840955	0.961832
100001054	butyrylcarnitine (C4)	Lipid	Fatty Acid Metabolism (also BCAA Metabolism)	-0.012183	-0.136, 0.111	0.84091	0.961832
100009272	glycosyl-N-palmitoyl-sphingosine (d18:1/16:0)	Lipid	Hexosylceramides (HCER)	0.009461	-0.089, 0.108	0.84491	0.961832
100006089	isoeugenol sulfate	Xenobiotics	Food Component/Plant	0.067785	-0.634, 0.769	0.844332	0.961832
100008957	sphingomyelin (d18:2/24:1, d18:1/24:2)*	Lipid	Sphingomyelins	0.007669	-0.072, 0.087	0.843948	0.961832
100002873	1-lignoceroyl-GPC (24:0)	Lipid	Lysophospholipid	0.010361	-0.099, 0.12	0.847033	0.962422
100015684	myristoyl-linoleoyl-glycerol (14:0/18:2) [2]*	Lipid	Diacylglycerol	-0.068931	-0.796, 0.658	0.847136	0.962422
1539	1-palmitoyl-2-oleoyl-GPC (16:0/18:1)	Lipid	Phosphatidylcholine (PC)	0.010411	-0.101, 0.122	0.849717	0.962946
100002458	3-methylglutaconate	Amino Acid	Leucine, Isoleucine and Valine Metabolism	-0.010567	-0.133, 0.111	0.860229	0.962946
100002761	androsterone glucuronide	Lipid	Androgenic Steroids	-0.029214	-0.352, 0.293	0.853961	0.962946
100002769	argininate*	Amino Acid	Urea cycle; Arginine and Proline Metabolism	-0.035601	-0.444, 0.372	0.859222	0.962946
278	cysteinylglycine	Amino Acid	Glutathione Metabolism	0.020922	-0.221, 0.263	0.860414	0.962946
100019981	heptenedioate (C7:1-DC)*	Lipid	Fatty Acid, Dicarboxylate	-0.023402	-0.28, 0.233	0.852873	0.962946
100015723	hexadecasphingosine (d16:1)*	Lipid	Sphingosines	-0.033534	-0.394, 0.327	0.850216	0.962946
100001055	isobutyrylcarnitine (C4)	Amino Acid	Leucine, Isoleucine and Valine Metabolism	0.021382	-0.208, 0.25	0.849439	0.962946
100015831	linolenoylcarnitine (C18:3)*	Lipid	Fatty Acid Metabolism (Acyl Carnitine, Polyunsaturated)	0.015341	-0.159, 0.19	0.858314	0.962946
407	lysine	Amino Acid	Lysine Metabolism	-0.007581	-0.094, 0.079	0.858129	0.962946
100000707	maleate	Lipid	Fatty Acid, Dicarboxylate	0.01781	-0.187, 0.223	0.859775	0.962946
100003915	palmitamide (16:0)	Lipid	Fatty Acid, Amide	0.036443	-0.384, 0.457	0.860329	0.962946
460	phenylalanine	Amino Acid	Phenylalanine Metabolism	-0.006814	-0.082, 0.068	0.853085	0.962946
1026	phosphoethanolamine	Lipid	Phospholipid Metabolism	0.024936	-0.25, 0.3	0.853632	0.962946
1001	trans-4-hydroxyproline	Amino Acid	Urea cycle; Arginine and Proline Metabolism	-0.012567	-0.152, 0.127	0.85446	0.962946
1124	citrate	Energy	TCA Cycle	-0.005585	-0.071, 0.06	0.861838	0.963322
100004284	dimethyl sulfone	Xenobiotics	Chemical	0.01476	-0.158, 0.188	0.862459	0.963322
297	sphingosine	Lipid	Sphingosines	0.033472	-0.365, 0.432	0.864329	0.9635
100002528	sulfate*	Xenobiotics	Chemical	-0.011041	-0.142, 0.12	0.86364	0.9635
100021329	(S)-a-amino-omega-caprolactam	Xenobiotics	Food Component/Plant	-0.007727	-0.118, 0.102	0.88646	0.965389
100009162	1-(1-enyl-palmitoyl)-2-palmitoyl-GPC (P-16:0/16:0)*	Lipid	Plasmalogen	0.006045	-0.071, 0.083	0.873132	0.965389
100000580	1,5-anhydroglucitol (1,5-AG)	Carbohydrate	Glycolysis, Gluconeogenesis, and Pyruvate Metabolism	-0.012161	-0.171, 0.147	0.876584	0.965389
100002126	16alpha-hydroxy DHEA 3-sulfate	Lipid	Androgenic Steroids	0.033839	-0.417, 0.485	0.878842	0.965389
100002171	1-margaroyl-GPE (17:0)*	Lipid	Lysophospholipid	0.038432	-0.472, 0.549	0.878469	0.965389
100001869	1-stearoyl-2-arachidonoyl-GPC (18:0/20:4)	Lipid	Phosphatidylcholine (PC)	-0.012377	-0.165, 0.14	0.869244	0.965389
100015592	1-stearoyl-2-docosapentaenoyl-GPE (18:0/22:5n3)*	Lipid	Phosphatidylethanolamine (PE)	-0.013825	-0.184, 0.157	0.868998	0.965389
100004327	1-stearoyl-GPS (18:0)*	Lipid	Lysophospholipid	-0.041381	-0.627, 0.545	0.885876	0.965389
100001541	2-hydroxy-3-methylvalerate	Amino Acid	Leucine, Isoleucine and Valine Metabolism	-0.020591	-0.312, 0.271	0.885723	0.965389
100001509	2-methylbutyrylcarnitine (C5)	Amino Acid	Leucine, Isoleucine and Valine Metabolism	-0.02575	-0.374, 0.323	0.880677	0.965389
100001563	2-myristoyl-GPC (14:0)*	Lipid	Lysophospholipid	0.012986	-0.179, 0.205	0.890609	0.965389
100010896	2'-O-methyluridine	Nucleotide	Pyrimidine Metabolism, Uracil containing	-0.018337	-0.285, 0.248	0.88889	0.965389
100006103	3-hydroxyindolin-2-one sulfate	Xenobiotics	Food Component/Plant	-0.040688	-0.582, 0.501	0.878613	0.965389
100001466	3-methylcytidine	Nucleotide	Pyrimidine Metabolism, Cytidine containing	0.01116	-0.144, 0.167	0.883969	0.965389
100020631	4-methylhexanoylglutamine	Lipid	Fatty Acid Metabolism (Acyl Glutamine)	0.04232	-0.495, 0.58	0.872809	0.965389
100000272	allo-threonine	Amino Acid	Glycine, Serine and Threonine Metabolism	0.060359	-0.706, 0.827	0.872883	0.965389
100000706	alpha-hydroxyisocaproate	Amino Acid	Leucine, Isoleucine and Valine Metabolism	0.013304	-0.165, 0.192	0.879434	0.965389
1258	anthranilate	Amino Acid	Tryptophan Metabolism	-0.015387	-0.243, 0.213	0.890865	0.965389
100020866	dimethylguanidino valeric acid (DMGV)*	Amino Acid	Urea cycle; Arginine and Proline Metabolism	0.066896	-0.792, 0.925	0.87415	0.965389
2054	ethylmalonate	Amino Acid	Leucine, Isoleucine and Valine Metabolism	0.007986	-0.101, 0.117	0.881408	0.965389
100000961	homoarginine	Amino Acid	Urea cycle; Arginine and Proline Metabolism	-0.008974	-0.12, 0.103	0.870086	0.965389
100000263	imidazole lactate	Amino Acid	Histidine Metabolism	0.017583	-0.215, 0.251	0.878129	0.965389
376	isoleucine	Amino Acid	Leucine, Isoleucine and Valine Metabolism	-0.006748	-0.097, 0.084	0.879533	0.965389
100002813	leukotriene B5	Lipid	Eicosanoid	-0.032991	-0.484, 0.418	0.881798	0.965389
100000039	methionine sulfoxide	Amino Acid	Methionine, Cysteine, SAM and Taurine Metabolism	0.005846	-0.076, 0.088	0.884756	0.965389
100001413	N4-acetylcytidine	Nucleotide	Pyrimidine Metabolism, Cytidine containing	0.03051	-0.416, 0.477	0.88965	0.965389
100008920	sphingomyelin (d18:1/17:0, d17:1/18:0, d19:1/16:0)	Lipid	Sphingomyelins	0.005793	-0.078, 0.09	0.888831	0.965389
1629	taurochenodeoxycholate	Lipid	Primary Bile Acid Metabolism	-0.05111	-0.739, 0.637	0.87993	0.965389
100008955	tricosanoyl sphingomyelin (d18:1/23:0)*	Lipid	Sphingomyelins	0.005527	-0.076, 0.087	0.889794	0.965389
100015971	cortolone glucuronide (1)	Lipid	Corticosteroids	-0.010121	-0.163, 0.143	0.892975	0.965819
100006290	sphingomyelin (d18:1/20:0, d16:1/22:0)*	Lipid	Sphingomyelins	-0.009514	-0.153, 0.134	0.89261	0.965819
100005371	1-dihomo-linolenoyl-GPE (20:3n3 or 6)*	Lipid	Lysophospholipid	-0.028364	-0.479, 0.422	0.898087	0.968662
35	S-1-pyrroline-5-carboxylate	Amino Acid	Glutamate Metabolism	-0.017137	-0.287, 0.253	0.897421	0.968662
100002773	solanidine	Xenobiotics	Food Component/Plant	0.016639	-0.248, 0.281	0.898183	0.968662
100003686	N-palmitoylglycine	Lipid	Fatty Acid Metabolism (Acyl Glycine)	0.009542	-0.144, 0.163	0.899576	0.969237
100008918	1-(1-enyl-stearoyl)-2-arachidonoyl-GPC (P-18:0/20:4)	Lipid	Plasmalogen	0.007503	-0.119, 0.134	0.904223	0.969741
100001433	1-arachidonylglycerol (20:4)	Lipid	Monoacylglycerol	-0.031753	-0.563, 0.499	0.903244	0.969741
100006121	1-dihomo-linolenylglycerol (20:3)	Lipid	Monoacylglycerol	-0.037185	-0.66, 0.585	0.903386	0.969741
100001868	4-allylphenol sulfate	Xenobiotics	Food Component/Plant	-0.028991	-0.519, 0.461	0.904346	0.969741
100020014	glucuronide of C10H18O2 (7)*	Partially Characterized Molecules	Partially Characterized Molecules	-0.035426	-0.617, 0.546	0.901511	0.969741
50	spermidine	Amino Acid	Polyamine Metabolism	0.014211	-0.235, 0.263	0.90759	0.972295
208	adenosine 5'-diphosphate (ADP)	Nucleotide	Purine Metabolism, Adenine containing	-0.042127	-0.796, 0.711	0.90951	0.972502
100015835	cerotoylcarnitine (C26)*	Lipid	Fatty Acid Metabolism (Acyl Carnitine, Long Chain Saturated)	0.00665	-0.111, 0.125	0.908865	0.972502
330	fumarate	Energy	TCA Cycle	0.007861	-0.135, 0.151	0.911054	0.97323
100015689	1-palmitoyl-2-(hydroxylinoleoyl)-GPC (16:0/18:2(OH))*	Lipid	Phosphatidylcholine (PC)	0.006611	-0.118, 0.131	0.913823	0.974805
100001270	myristoylcarnitine (C14)	Lipid	Fatty Acid Metabolism (Acyl Carnitine, Long Chain Saturated)	-0.009115	-0.181, 0.163	0.914258	0.974805
536	2'-deoxyuridine	Nucleotide	Pyrimidine Metabolism, Uracil containing	-0.019057	-0.393, 0.354	0.917389	0.975375
100000436	glycodeoxycholate	Lipid	Secondary Bile Acid Metabolism	0.038954	-0.711, 0.789	0.915873	0.975375
100021100	tetradecadienedioate (C14:2-DC)*	Lipid	Fatty Acid, Dicarboxylate	0.028742	-0.53, 0.587	0.9167	0.975375
100004326	3-acetylphenol sulfate	Xenobiotics	Chemical	-0.031939	-0.69, 0.626	0.921382	0.977184
93	alpha-ketoglutarate	Energy	TCA Cycle	-0.00494	-0.106, 0.097	0.921213	0.977184
100001993	pregnenediol disulfate (C21H34O8S2)*	Lipid	Pregnenolone Steroids	-0.036734	-0.796, 0.723	0.921691	0.977184
100009132	1-linoleoyl-2-docosahexaenoyl-GPC (18:2/22:6)*	Lipid	Phosphatidylcholine (PC)	-0.005738	-0.126, 0.115	0.922746	0.977383
100002103	5-methylthioribose**	Amino Acid	Methionine, Cysteine, SAM and Taurine Metabolism	-0.016361	-0.388, 0.355	0.928632	0.981772
100020478	dodecadienoate (12:2)*	Lipid	Fatty Acid, Dicarboxylate	0.008258	-0.177, 0.193	0.927786	0.981772
100000626	sphingosine 1-phosphate	Lipid	Sphingosines	-0.006501	-0.16, 0.147	0.931205	0.983569
100001615	octadecanedioate (C18-DC)	Lipid	Fatty Acid, Dicarboxylate	-0.012667	-0.32, 0.294	0.933177	0.984729
100009154	1-palmitoyl-2-gamma-linolenoyl-GPC (16:0/18:3n6)*	Lipid	Phosphatidylcholine (PC)	-0.008991	-0.237, 0.219	0.936203	0.986131
100001396	7-methylxanthine	Xenobiotics	Xanthine Metabolism	-0.017811	-0.474, 0.439	0.936778	0.986131
100001257	N-acetylasparagine	Amino Acid	Alanine and Aspartate Metabolism	-0.009133	-0.245, 0.226	0.93713	0.986131
100004054	margaroylcarnitine (C17)*	Lipid	Fatty Acid Metabolism (Acyl Carnitine, Long Chain Saturated)	0.004418	-0.112, 0.121	0.938674	0.986834
100020203	3-hydroxystachydrine*	Xenobiotics	Food Component/Plant	0.038639	-1.0, 1.077	0.939693	0.986984
100020546	N2-acetyl,N6-methyllysine	Amino Acid	Lysine Metabolism	0.006554	-0.184, 0.197	0.944178	0.990772
100001040	1-linoleoylglycerol (18:2)	Lipid	Monoacylglycerol	-0.015514	-0.492, 0.461	0.947222	0.991367
100008915	1-palmitoyl-2-docosahexaenoyl-GPC (16:0/22:6)	Lipid	Phosphatidylcholine (PC)	-0.003498	-0.129, 0.122	0.954774	0.991367
100015587	1-stearyl-2-docosapentaenoyl-GPC (O-18:0/22:5n3)*	Lipid	Plasmalogen	-0.002122	-0.065, 0.061	0.945681	0.991367
100001561	2-palmitoleoyl-GPC (16:1)*	Lipid	Lysophospholipid	0.017676	-0.629, 0.664	0.95567	0.991367
100019801	3-hydroxyoleoylcarnitine	Lipid	Fatty Acid Metabolism (Acyl Carnitine, Hydroxy)	0.006337	-0.219, 0.232	0.954509	0.991367
100001992	androstenediol (3beta,17beta) disulfate (1)	Lipid	Androgenic Steroids	0.021795	-0.758, 0.802	0.954694	0.991367
563	glutamine	Amino Acid	Glutamate Metabolism	-0.001662	-0.059, 0.056	0.953113	0.991367
397	leucine	Amino Acid	Leucine, Isoleucine and Valine Metabolism	-0.00347	-0.124, 0.117	0.953386	0.991367
415	methionine	Amino Acid	Methionine, Cysteine, SAM and Taurine Metabolism	0.003288	-0.123, 0.13	0.957821	0.991367
100001409	N1-methylinosine	Nucleotide	Purine Metabolism, (Hypo)Xanthine/Inosine containing	0.00264	-0.099, 0.104	0.95794	0.991367
213	N6-methyladenosine	Nucleotide	Purine Metabolism, Adenine containing	-0.012574	-0.452, 0.427	0.953649	0.991367
100001266	N-acetylarginine	Amino Acid	Urea cycle; Arginine and Proline Metabolism	0.004267	-0.132, 0.141	0.949252	0.991367
100001293	N-acetylhistidine	Amino Acid	Histidine Metabolism	-0.012765	-0.497, 0.472	0.957303	0.991367
100000285	N-alpha-acetylornithine	Amino Acid	Urea cycle; Arginine and Proline Metabolism	-0.008592	-0.302, 0.285	0.952525	0.991367
1538	stearoyl sphingomyelin (d18:1/18:0)	Lipid	Sphingomyelins	-0.004611	-0.155, 0.145	0.950139	0.991367
100009131	1-linoleoyl-2-arachidonoyl-GPC (18:2/20:4n6)*	Lipid	Phosphatidylcholine (PC)	-0.002131	-0.089, 0.085	0.960166	0.991629
100020219	3-formylindole	Xenobiotics	Food Component/Plant	0.002142	-0.092, 0.096	0.962924	0.991629
1053	3-ureidopropionate	Nucleotide	Pyrimidine Metabolism, Uracil containing	0.004498	-0.195, 0.204	0.963473	0.991629
100001731	indoleacetylglutamine	Amino Acid	Tryptophan Metabolism	-0.008472	-0.368, 0.351	0.961778	0.991629
100010924	palmitoyl-arachidonoyl-glycerol (16:0/20:4) [1]*	Lipid	Diacylglycerol	-0.008697	-0.377, 0.36	0.961763	0.991629
100000295	tartarate	Xenobiotics	Food Component/Plant	0.010956	-0.446, 0.468	0.961132	0.991629
100006435	N-acetylglucosamine/N-acetylgalactosamine	Carbohydrate	Aminosugar Metabolism	-0.003688	-0.183, 0.175	0.966607	0.993512
821	pseudouridine	Nucleotide	Pyrimidine Metabolism, Uracil containing	-0.003953	-0.199, 0.191	0.967065	0.993512
409	malate	Energy	TCA Cycle	0.003106	-0.155, 0.161	0.968072	0.99364
100008990	1-palmitoyl-2-arachidonoyl-GPE (16:0/20:4)*	Lipid	Phosphatidylethanolamine (PE)	0.001952	-0.118, 0.122	0.973534	0.995771
240	3-(4-hydroxyphenyl)lactate	Amino Acid	Tyrosine Metabolism	0.002298	-0.127, 0.132	0.971159	0.995771
100015625	glycosyl-N-behenoyl-sphingadienine (d18:2/22:0)*	Lipid	Hexosylceramides (HCER)	-0.002681	-0.158, 0.153	0.972021	0.995771
100010936	oleoyl-arachidonoyl-glycerol (18:1/20:4) [1]*	Lipid	Diacylglycerol	-0.003154	-0.198, 0.191	0.973682	0.995771
100010918	oleoyl-oleoyl-glycerol (18:1/18:1) [1]*	Lipid	Diacylglycerol	-0.004807	-0.324, 0.314	0.975567	0.996794
100000282	N-acetylglutamate	Amino Acid	Glutamate Metabolism	-0.001413	-0.105, 0.103	0.977985	0.998056
1162	N-acetylneuraminate	Carbohydrate	Aminosugar Metabolism	0.001793	-0.134, 0.137	0.978574	0.998056
100002356	(16 or 17)-methylstearate (a19:0 or i19:0)	Lipid	Fatty Acid, Branched	-0.002064	-0.341, 0.337	0.990129	0.999033
100009007	1-(1-enyl-palmitoyl)-2-oleoyl-GPC (P-16:0/18:1)*	Lipid	Plasmalogen	8.9e-05	-0.078, 0.078	0.998146	0.999033
100009004	1-(1-enyl-stearoyl)-2-docosahexaenoyl-GPE (P-18:0/22:6)*	Lipid	Plasmalogen	0.000644	-0.107, 0.108	0.990249	0.999033
100001552	1-dihomo-linolenoyl-GPC (20:3n3 or 6)*	Lipid	Lysophospholipid	-0.000687	-0.148, 0.147	0.992459	0.999033
100021918	2,4-di-tert-butylphenol	Xenobiotics	Chemical	-0.000488	-0.103, 0.102	0.992258	0.999033
100021666	branched-chain, straight-chain, or cyclopropyl 10:1 fatty acid (1)*	Partially Characterized Molecules	Partially Characterized Molecules	0.005515	-0.458, 0.469	0.980683	0.999033
100015968	carotene diol (3)	Cofactors and Vitamins	Vitamin A Metabolism	-0.00211	-0.419, 0.415	0.991786	0.999033
800	cysteine	Amino Acid	Methionine, Cysteine, SAM and Taurine Metabolism	0.000477	-0.154, 0.155	0.994996	0.999033
100015622	glycosyl-N-behenoyl-sphingosine (d18:1/22:0)*	Lipid	Hexosylceramides (HCER)	0.001791	-0.223, 0.227	0.987102	0.999033
100002911	glycoursodeoxycholate	Lipid	Secondary Bile Acid Metabolism	0.001955	-0.616, 0.62	0.994871	0.999033
100010923	linoleoyl-arachidonoyl-glycerol (18:2/20:4) [2]*	Lipid	Diacylglycerol	-0.003012	-0.336, 0.33	0.985336	0.999033
100001472	mead acid (20:3n9)	Lipid	Long Chain Polyunsaturated Fatty Acid (n3 and n6)	-0.003727	-0.43, 0.423	0.98583	0.999033
100020545	N2-acetyl,N6,N6-dimethyllysine	Amino Acid	Lysine Metabolism	-0.001	-0.165, 0.163	0.990102	0.999033
1215	N-acetylglucosaminylasparagine	Carbohydrate	Aminosugar Metabolism	-0.00046	-0.111, 0.11	0.993231	0.999033
100001276	N-acetylisoleucine	Amino Acid	Leucine, Isoleucine and Valine Metabolism	0.000447	-0.285, 0.286	0.997455	0.999033
1083	N-acetylmethionine	Amino Acid	Methionine, Cysteine, SAM and Taurine Metabolism	0.000253	-0.162, 0.162	0.997468	0.999033
892	nonadecanoate (19:0)	Lipid	Long Chain Saturated Fatty Acid	0.003137	-0.302, 0.309	0.983344	0.999033
437	pelargonate (9:0)	Lipid	Medium Chain Fatty Acid	0.000919	-0.335, 0.337	0.995561	0.999033
100002129	pregnenolone sulfate	Lipid	Pregnenolone Steroids	0.001647	-0.291, 0.294	0.990875	0.999033
100001132	pyroglutamylvaline	Peptide	Modified Peptides	0.00343	-0.515, 0.522	0.98927	0.999033
537	trans-urocanate	Amino Acid	Histidine Metabolism	0.000738	-0.475, 0.476	0.997484	0.999033
1140	gamma-glutamylglutamine	Peptide	Gamma-glutamyl Amino Acid	-5.1e-05	-0.089, 0.089	0.999078	0.999078

## Sheet: Supplementary Table S4-2
CHEM_ID	Biochemical name	Super pathway	Sub-pathway	β-estimate	95 % CI	P-value	q-value
100020360	8-methoxykynurenate	Amino Acid	Tryptophan Metabolism	1.7385	1.082, 2.395	1.42637e-05	0.0150197
114	3-hydroxyphenylacetate	Amino Acid	Phenylalanine Metabolism	-1.69647	-2.386, -1.007	3.75279e-05	0.016589
100001083	indolepropionate	Amino Acid	Tryptophan Metabolism	-1.09205	-1.544, -0.64	4.7262e-05	0.016589
179	9,10-DiHOME	Lipid	Fatty Acid, Dihydroxy	1.73379	0.854, 2.614	0.000466263	0.0490003
461	phosphate	Energy	Oxidative Phosphorylation	2.20613	1.064, 3.348	0.000567018	0.0490003
100000103	agmatine	Amino Acid	Polyamine Metabolism	-1.73682	-2.589, -0.885	0.000328787	0.0490003
100000806	isocaproate (i6:0)	Lipid	Fatty Acid, Branched	-1.63261	-2.496, -0.77	0.00069801	0.0490003
100001121	pyridoxate	Cofactors and Vitamins	Vitamin B6 Metabolism	1.56956	0.827, 2.312	0.000221326	0.0490003
100001568	1-myristoyl-GPE (14:0)	Lipid	Lysophospholipid	-1.27255	-1.926, -0.619	0.000526793	0.0490003
100006634	3-hydroxyphenylacetate sulfate	Amino Acid	Tyrosine Metabolism	-0.823213	-1.258, -0.389	0.000686391	0.0490003
100009052	palmitoyl-linoleoyl-glycerol (16:0/18:2) [1]*	Lipid	Diacylglycerol	1.79037	0.862, 2.719	0.000578453	0.0490003
100010917	palmitoyl-oleoyl-glycerol (16:0/18:1) [2]*	Lipid	Diacylglycerol	1.68484	0.845, 2.525	0.000389738	0.0490003
100015966	carotene diol (1)	Cofactors and Vitamins	Vitamin A Metabolism	-0.844257	-1.272, -0.417	0.000454172	0.0490003
100019981	heptenedioate (C7:1-DC)*	Lipid	Fatty Acid, Dicarboxylate	1.03339	0.515, 1.552	0.000415527	0.0490003
100021374	branched chain 14:0 dicarboxylic acid**	Lipid	Fatty Acid, Dicarboxylate	-1.40597	-2.139, -0.673	0.000608603	0.0490003
100001104	N-acetyltyrosine	Amino Acid	Tyrosine Metabolism	-0.689312	-1.061, -0.318	0.000840742	0.0553314
50	spermidine	Amino Acid	Polyamine Metabolism	-1.66208	-2.581, -0.743	0.00106676	0.0614051
100001979	alpha-tocotrienol	Cofactors and Vitamins	Tocopherol Metabolism	1.1416	0.508, 1.775	0.00110797	0.0614051
100002171	1-margaroyl-GPE (17:0)*	Lipid	Lysophospholipid	-1.11779	-1.733, -0.503	0.00101667	0.0614051
2053	tricarballylate	Energy	TCA Cycle	1.23631	0.542, 1.931	0.00123639	0.0619961
100005946	2-keto-3-deoxy-gluconate	Xenobiotics	Food Component/Plant	-0.953753	-1.487, -0.42	0.00119081	0.0619961
918	fucose	Carbohydrate	Aminosugar Metabolism	-0.398487	-0.627, -0.17	0.00146819	0.0702728
1137	oleoyl ethanolamide	Lipid	Endocannabinoid	1.82306	0.767, 2.879	0.00161842	0.0740957
100015967	carotene diol (2)	Cofactors and Vitamins	Vitamin A Metabolism	-0.934928	-1.479, -0.391	0.00169367	0.0743099
100000044	anserine	Amino Acid	Histidine Metabolism	-1.52893	-2.431, -0.627	0.00189934	0.08
100001198	myristoleate (14:1n5)	Lipid	Long Chain Monounsaturated Fatty Acid	-1.21998	-1.96, -0.48	0.0023937	0.0900203
100015962	N,N,N-trimethyl-5-aminovalerate	Amino Acid	Lysine Metabolism	-1.0546	-1.689, -0.42	0.00222968	0.0900203
100021478	1-methyl-5-imidazolelactate	Amino Acid	Histidine Metabolism	-1.22925	-1.972, -0.487	0.00230944	0.0900203
231	arginine	Amino Acid	Urea cycle; Arginine and Proline Metabolism	-0.914362	-1.481, -0.348	0.00284247	0.0917615
100000276	maltotriose	Carbohydrate	Glycogen Metabolism	-1.22024	-1.977, -0.463	0.00287572	0.0917615
100001767	pyrraline	Xenobiotics	Food Component/Plant	-1.65243	-2.671, -0.634	0.00273689	0.0917615
100006120	N-acetylpyrraline	Xenobiotics	Food Component/Plant	-1.47313	-2.376, -0.57	0.00261734	0.0917615
100015655	LAHSA (18:2/OH-18:0)*	Lipid	Fatty Acid Hydroxyl Fatty Acid	1.66331	0.643, 2.684	0.00263861	0.0917615
888	caprate (10:0)	Lipid	Medium Chain Fatty Acid	-0.719383	-1.18, -0.259	0.00367715	0.0922293
1489	palmitoyl ethanolamide	Lipid	Endocannabinoid	1.35382	0.488, 2.22	0.00367866	0.0922293
100001254	N-acetyltryptophan	Amino Acid	Tryptophan Metabolism	-0.807715	-1.323, -0.293	0.00358433	0.0922293
100001446	5-methyluridine (ribothymidine)	Nucleotide	Pyrimidine Metabolism, Uracil containing	-0.883911	-1.445, -0.323	0.00343248	0.0922293
100002196	13-HODE + 9-HODE	Lipid	Fatty Acid, Monohydroxy	1.8749	0.691, 3.059	0.00332351	0.0922293
100002382	2-aminophenol	Xenobiotics	Food Component/Plant	1.30816	0.488, 2.129	0.0031443	0.0922293
100004206	2,8-quinolinediol	Xenobiotics	Food Component/Plant	-1.20862	-1.977, -0.44	0.00350585	0.0922293
100004363	cyclo(pro-tyr)	Peptide	Dipeptide	-0.682845	-1.119, -0.247	0.00360115	0.0922293
100008932	phenylacetyltaurine	Peptide	Acetylated Peptides	1.21929	0.458, 1.98	0.00302371	0.0922293
100003000	1-(1-enyl-palmitoyl)-GPE (P-16:0)*	Lipid	Lysoplasmalogen	-1.04288	-1.713, -0.373	0.00380248	0.0931166
100001550	homostachydrine*	Xenobiotics	Food Component/Plant	-1.5042	-2.48, -0.529	0.00407691	0.0953996
100001567	1-palmitoyl-GPE (16:0)	Lipid	Lysophospholipid	-0.893453	-1.472, -0.315	0.00401899	0.0953996
100000436	glycodeoxycholate	Lipid	Secondary Bile Acid Metabolism	-1.05908	-1.753, -0.365	0.00440388	0.0990906
100000856	trizma acetate	Xenobiotics	Chemical	-1.31521	-2.177, -0.453	0.00442285	0.0990906
209	adenosine 5'-monophosphate (AMP)	Nucleotide	Purine Metabolism, Adenine containing	1.01316	0.346, 1.68	0.00457162	0.0990981
1105	alpha-tocopherol	Cofactors and Vitamins	Tocopherol Metabolism	-0.546683	-0.907, -0.186	0.0046114	0.0990981
100006726	linoleoyl ethanolamide	Lipid	Endocannabinoid	1.56606	0.522, 2.61	0.00500797	0.105468
100001975	curcumin	Xenobiotics	Food Component/Plant	1.74025	0.569, 2.912	0.00538003	0.111082
100001689	pheophorbide A	Xenobiotics	Food Component/Plant	-1.48551	-2.49, -0.481	0.00554663	0.112319
100001126	gamma-glutamylvaline	Peptide	Gamma-glutamyl Amino Acid	0.969566	0.304, 1.635	0.00617866	0.112861
100004250	4-hydroxycyclohexylcarboxylic acid	Xenobiotics	Food Component/Plant	-0.796107	-1.34, -0.252	0.00601527	0.112861
100015963	valine betaine	Amino Acid	Leucine, Isoleucine and Valine Metabolism	-0.454728	-0.766, -0.144	0.00606119	0.112861
100019974	nonenedioate (C9:1-DC)*	Lipid	Fatty Acid, Dicarboxylate	0.390807	0.123, 0.659	0.00616643	0.112861
100021130	carboxysuccinate	Energy	TCA Cycle	1.27606	0.404, 2.149	0.00601659	0.112861
100021503	N-carbamoylputrescine	Amino Acid	Polyamine Metabolism	-0.817272	-1.379, -0.256	0.00621644	0.112861
536	2'-deoxyuridine	Nucleotide	Pyrimidine Metabolism, Uracil containing	-0.789899	-1.341, -0.239	0.00692088	0.120972
100002204	N-acetyl-3-methylhistidine*	Amino Acid	Histidine Metabolism	-1.06556	-1.809, -0.322	0.00693423	0.120972
100002751	astaxanthin	Cofactors and Vitamins	Vitamin A Metabolism	-1.21706	-2.069, -0.365	0.00710063	0.120972
100010918	oleoyl-oleoyl-glycerol (18:1/18:1) [1]*	Lipid	Diacylglycerol	1.77043	0.53, 3.011	0.00715995	0.120972
100015609	N-palmitoyl-sphingadienine (d18:2/16:0)*	Lipid	Ceramides	-0.644779	-1.097, -0.192	0.00723764	0.120972
100000551	4-methyl-2-oxopentanoate	Amino Acid	Leucine, Isoleucine and Valine Metabolism	-1.00041	-1.708, -0.293	0.00762823	0.125508
211	2'-deoxyadenosine	Nucleotide	Purine Metabolism, Adenine containing	-0.702362	-1.208, -0.197	0.00853012	0.128151
100001436	3-ketosphinganine	Lipid	Sphingolipid Synthesis	-1.2201	-2.094, -0.347	0.00827127	0.128151
100001948	succinylcarnitine (C4-DC)	Energy	TCA Cycle	-0.838781	-1.439, -0.239	0.00820474	0.128151
100001977	beta-cryptoxanthin	Cofactors and Vitamins	Vitamin A Metabolism	-1.29347	-2.223, -0.364	0.00847891	0.128151
100008981	1-oleoyl-2-linoleoyl-GPC (18:1/18:2)*	Lipid	Phosphatidylcholine (PC)	1.40646	0.395, 2.418	0.00850108	0.128151
100019894	2-hydroxylignocerate*	Lipid	Fatty Acid, Monohydroxy	1.10649	0.309, 1.904	0.00864074	0.128151
100020004	3-carboxy-4-methyl-5-pentyl-2-furanpropionate (3-CMPFP)**	Lipid	Fatty Acid, Dicarboxylate	-1.01705	-1.744, -0.29	0.0081699	0.128151
100020407	enterolactone sulfate	Xenobiotics	Food Component/Plant	-1.23646	-2.137, -0.336	0.00926298	0.135471
291	glucose 6-phosphate	Carbohydrate	Glycolysis, Gluconeogenesis, and Pyruvate Metabolism	2.07858	0.552, 3.605	0.00977899	0.135901
100001397	1,3,7-trimethylurate	Xenobiotics	Xanthine Metabolism	-0.895468	-1.553, -0.238	0.00980864	0.135901
100001827	pheophytin A	Xenobiotics	Food Component/Plant	-1.09651	-1.901, -0.292	0.00972042	0.135901
100003700	diglycerol	Xenobiotics	Chemical	-1.49429	-2.586, -0.403	0.00944383	0.135901
100003152	N-methyl-GABA	Amino Acid	Glutamate Metabolism	-0.771958	-1.34, -0.204	0.00993805	0.135906
100003686	N-palmitoylglycine	Lipid	Fatty Acid Metabolism (Acyl Glycine)	1.2848	0.336, 2.233	0.0101221	0.136649
1113	4-acetamidobutanoate	Amino Acid	Polyamine Metabolism	0.746358	0.193, 1.299	0.010356	0.138036
100000135	2'-deoxyinosine	Nucleotide	Purine Metabolism, (Hypo)Xanthine/Inosine containing	-1.00116	-1.747, -0.256	0.0107059	0.140916
100008996	1-palmitoyl-2-palmitoleoyl-GPE (16:0/16:1)*	Lipid	Phosphatidylethanolamine (PE)	-0.968693	-1.695, -0.242	0.0111901	0.145471
100003640	valylglutamine	Peptide	Dipeptide	1.02626	0.254, 1.798	0.0114077	0.146492
872	thymidine	Nucleotide	Pyrimidine Metabolism, Thymine containing	-0.642651	-1.129, -0.156	0.0118617	0.149499
100000101	pimelate (C7-DC)	Lipid	Fatty Acid, Dicarboxylate	0.803634	0.194, 1.414	0.0120742	0.149499
100002397	alpha-ketoglutaramate*	Amino Acid	Glutamate Metabolism	-0.907227	-1.595, -0.219	0.0119724	0.149499
100002989	oleoyl-linoleoyl-glycerol (18:1/18:2) [1]	Lipid	Diacylglycerol	1.51652	0.361, 2.672	0.0123518	0.149499
100003265	2-oxo-1-pyrrolidinepropionate	Xenobiotics	Chemical	-1.02992	-1.814, -0.246	0.0122844	0.149499
100015666	glycerophosphoserine*	Lipid	Phospholipid Metabolism	-0.905022	-1.597, -0.213	0.0126043	0.150821
100009038	myristoyl dihydrosphingomyelin (d18:0/14:0)*	Lipid	Dihydrosphingomyelins	-0.651196	-1.151, -0.152	0.0128615	0.15217
100001423	4-hydroxyhippurate	Xenobiotics	Benzoate Metabolism	0.636911	0.146, 1.128	0.0132126	0.152347
100005373	fructosyllysine	Amino Acid	Lysine Metabolism	-0.787081	-1.393, -0.181	0.0131996	0.152347
100008980	1-stearoyl-2-linoleoyl-GPC (18:0/18:2)*	Lipid	Phosphatidylcholine (PC)	1.4928	0.341, 2.644	0.0133105	0.152347
100002050	syringaldehyde	Xenobiotics	Food Component/Plant	-1.0862	-1.927, -0.246	0.013578	0.153738
100001269	campesterol	Lipid	Sterol	-0.906492	-1.611, -0.202	0.0139034	0.155748
100001890	alanylleucine	Peptide	Dipeptide	1.06539	0.219, 1.911	0.0158183	0.175333
100000042	3-methylhistidine	Amino Acid	Histidine Metabolism	-1.38065	-2.487, -0.274	0.0166821	0.182981
100001258	glycylleucine	Peptide	Dipeptide	0.656088	0.127, 1.185	0.0173625	0.188481
572	glucose	Carbohydrate	Glycolysis, Gluconeogenesis, and Pyruvate Metabolism	-0.673015	-1.218, -0.128	0.0176891	0.190068
568	pyridoxamine	Cofactors and Vitamins	Vitamin B6 Metabolism	-0.378746	-0.688, -0.07	0.0184423	0.194545
100004523	N-delta-acetylornithine	Amino Acid	Urea cycle; Arginine and Proline Metabolism	-0.383644	-0.697, -0.071	0.0184753	0.194545
100002910	1-methyl-5-imidazoleacetate	Amino Acid	Histidine Metabolism	-1.20118	-2.188, -0.215	0.0191831	0.199998
100001335	eicosenoate (20:1)	Lipid	Long Chain Monounsaturated Fatty Acid	1.34872	0.232, 2.466	0.0200815	0.207311
1102	gamma-glutamyltyrosine	Peptide	Gamma-glutamyl Amino Acid	-0.616972	-1.13, -0.104	0.0205624	0.210215
1442	beta-hydroxyisovalerate	Amino Acid	Leucine, Isoleucine and Valine Metabolism	-0.543238	-0.997, -0.09	0.0209686	0.212307
100001461	1-stearoyl-GPE (18:0)	Lipid	Lysophospholipid	-0.74637	-1.373, -0.12	0.0215543	0.216159
267	choline phosphate	Lipid	Phospholipid Metabolism	1.83361	0.281, 3.386	0.0226342	0.219457
100001296	stachydrine	Xenobiotics	Food Component/Plant	-0.809848	-1.496, -0.124	0.0226951	0.219457
100001620	glycerophosphoethanolamine	Lipid	Phospholipid Metabolism	-0.599191	-1.108, -0.091	0.0229252	0.219457
100001655	1-palmitoyl-GPI (16:0)	Lipid	Lysophospholipid	1.71058	0.261, 3.16	0.022729	0.219457
100020219	3-formylindole	Xenobiotics	Food Component/Plant	-0.417499	-0.771, -0.064	0.0227794	0.219457
466	phytanate	Xenobiotics	Food Component/Plant	-1.36073	-2.528, -0.194	0.0242505	0.22608
100001415	N6-carbamoylthreonyladenosine	Nucleotide	Purine Metabolism, Adenine containing	-0.709965	-1.318, -0.102	0.0240308	0.22608
100010916	palmitoyl-oleoyl-glycerol (16:0/18:1) [1]*	Lipid	Diacylglycerol	0.750833	0.107, 1.395	0.0242612	0.22608
100001197	10-undecenoate (11:1n1)	Lipid	Medium Chain Fatty Acid	-0.393051	-0.733, -0.053	0.0255052	0.233582
100020378	2-hydroxysebacate	Lipid	Fatty Acid, Dicarboxylate	0.650193	0.087, 1.213	0.0255099	0.233582
100000010	3-phenylpropionate (hydrocinnamate)	Xenobiotics	Benzoate Metabolism	-0.862712	-1.613, -0.113	0.0260483	0.234789
100004042	N-methylphenylalanine	Amino Acid	Phenylalanine Metabolism	0.878258	0.114, 1.642	0.0260877	0.234789
100015643	sphingadienine	Lipid	Sphingolipid Synthesis	1.10668	0.136, 2.077	0.0271838	0.242581
93	alpha-ketoglutarate	Energy	TCA Cycle	-0.521819	-0.981, -0.063	0.0275604	0.243875
348	2'-deoxyguanosine	Nucleotide	Purine Metabolism, Guanine containing	-0.808504	-1.522, -0.095	0.0280316	0.245977
100000036	3-methyl-2-oxovalerate	Amino Acid	Leucine, Isoleucine and Valine Metabolism	-0.847053	-1.597, -0.097	0.028491	0.247939
100003210	valylleucine	Peptide	Dipeptide	0.861405	0.098, 1.625	0.0287261	0.247939
407	lysine	Amino Acid	Lysine Metabolism	-0.367699	-0.696, -0.04	0.0295887	0.253308
100002029	androstenediol (3beta,17beta) monosulfate (2)	Lipid	Androgenic Steroids	0.893339	0.095, 1.691	0.0298531	0.25351
1528	1-palmitoyl-2-linoleoyl-GPI (16:0/18:2)	Lipid	Phosphatidylinositol (PI)	0.898332	0.092, 1.704	0.0304769	0.256737
100001734	N6-acetyllysine	Amino Acid	Lysine Metabolism	-0.343399	-0.652, -0.035	0.0307233	0.256759
100021277	5-hydroxypicolinic acid	Amino Acid	Tryptophan Metabolism	-0.565347	-1.074, -0.056	0.0310485	0.257434
100001212	guanidinosuccinate	Amino Acid	Guanidino and Acetamido Metabolism	0.460748	0.045, 0.877	0.0315159	0.258757
100001232	5-dodecenoate (12:1n7)	Lipid	Medium Chain Fatty Acid	-0.33524	-0.639, -0.032	0.0319453	0.258757
100002054	3,5-dihydroxybenzoic acid	Xenobiotics	Benzoate Metabolism	-0.647129	-1.232, -0.062	0.0317115	0.258757
932	caprylate (8:0)	Lipid	Medium Chain Fatty Acid	-0.385318	-0.736, -0.034	0.0327988	0.259094
1628	glycochenodeoxycholate	Lipid	Primary Bile Acid Metabolism	-0.847352	-1.621, -0.074	0.0332172	0.259094
100001020	ergosterol	Lipid	Sterol	-0.709771	-1.358, -0.062	0.0331721	0.259094
100010893	1-palmitoyl-2-linoleoyl-galactosylglycerol (16:0/18:2)*	Lipid	Galactosyl Glycerolipids	-0.761753	-1.455, -0.068	0.0327444	0.259094
100020838	5-methylhexanoate (i7:0)	Lipid	Fatty Acid, Branched	-0.683271	-1.304, -0.063	0.0322972	0.259094
100021131	undecenoylcarnitine (C11:1)	Lipid	Fatty Acid Metabolism (Acyl Carnitine, Monounsaturated)	0.621987	0.049, 1.195	0.0345909	0.267825
35	S-1-pyrroline-5-carboxylate	Amino Acid	Glutamate Metabolism	-0.730655	-1.409, -0.052	0.0359127	0.270115
361	inosine	Nucleotide	Purine Metabolism, (Hypo)Xanthine/Inosine containing	-0.632972	-1.219, -0.047	0.0354171	0.270115
100001131	N-methylglutamate	Amino Acid	Glutamate Metabolism	-0.941627	-1.816, -0.068	0.0358688	0.270115
100004434	1-methyl-beta-carboline-3-carboxylic acid	Xenobiotics	Food Component/Plant	-0.858254	-1.654, -0.062	0.0357355	0.270115
1216	N-acetyl-beta-glucosaminylamine	Carbohydrate	Aminosugar Metabolism	0.38736	0.024, 0.75	0.0375611	0.279705
100001102	dodecanedioate (C12-DC)	Lipid	Fatty Acid, Dicarboxylate	-0.604017	-1.172, -0.036	0.0381767	0.279705
100001106	1,3-dimethylurate	Xenobiotics	Xanthine Metabolism	-0.715476	-1.387, -0.044	0.0378849	0.279705
100015839	dihomo-linoleoylcarnitine (C20:2)*	Lipid	Fatty Acid Metabolism (Acyl Carnitine, Polyunsaturated)	-0.762489	-1.48, -0.045	0.0382502	0.279705
1506	N-linoleoylglycine	Lipid	Fatty Acid Metabolism (Acyl Glycine)	1.17693	0.065, 2.289	0.0389182	0.281753
100006124	N2,N6-diacetyllysine	Amino Acid	Lysine Metabolism	-0.559929	-1.089, -0.031	0.0390655	0.281753
100010901	gamma-glutamyl-alpha-lysine	Peptide	Gamma-glutamyl Amino Acid	-0.601123	-1.171, -0.031	0.039556	0.28335
100002528	sulfate*	Xenobiotics	Chemical	-1.11919	-2.189, -0.049	0.0411156	0.292532
1302	N-acetylsphingosine	Lipid	Sphingosines	1.25301	0.048, 2.458	0.0421556	0.293022
100000098	5-(2-hydroxyethyl)-4-methylthiazole	Cofactors and Vitamins	Thiamine Metabolism	-0.862474	-1.689, -0.036	0.0415798	0.293022
100000914	caffeate	Xenobiotics	Food Component/Plant	0.700825	0.027, 1.375	0.0422976	0.293022
100001313	gamma-glutamylmethionine	Peptide	Gamma-glutamyl Amino Acid	-0.482446	-0.946, -0.018	0.0422184	0.293022
100000849	2,3-dimethylsuccinate	Amino Acid	Leucine, Isoleucine and Valine Metabolism	-0.342245	-0.673, -0.012	0.0429465	0.295573
882	thymine	Nucleotide	Pyrimidine Metabolism, Thymine containing	-0.67795	-1.338, -0.018	0.0446749	0.297739
889	undecanoate (11:0)	Lipid	Medium Chain Fatty Acid	-0.408368	-0.804, -0.013	0.0436835	0.297739
100000275	maltotetraose	Carbohydrate	Glycogen Metabolism	-1.11095	-2.19, -0.032	0.0440748	0.297739
100000455	itaconate	Energy	TCA Cycle	-0.558336	-1.102, -0.015	0.044498	0.297739
100008928	2-hydroxybutyrate/2-hydroxyisobutyrate	Amino Acid	Glutathione Metabolism	-0.660927	-1.303, -0.018	0.0442908	0.297739
100010945	lactosyl-N-stearoyl-sphingosine (d18:1/18:0)*	Lipid	Lactosylceramides (LCER)	-0.250324	-0.495, -0.006	0.0452888	0.299931
100006438	citraconate/glutaconate	Energy	TCA Cycle	-0.408715	-0.809, -0.008	0.0459817	0.302617
100009057	(3'-5')-uridylylguanosine	Nucleotide	Dinucleotide	0.591202	0.009, 1.173	0.0467211	0.305574
849	caffeine	Xenobiotics	Xanthine Metabolism	-1.12996	-2.253, -0.006	0.0488008	0.315259
100002797	m-tyramine	Amino Acid	Tyrosine Metabolism	-0.795461	-1.585, -0.006	0.0485117	0.315259
100015833	arachidoylcarnitine (C20)*	Lipid	Fatty Acid Metabolism (Acyl Carnitine, Long Chain Saturated)	-0.571107	-1.141, -0.001	0.0496503	0.318791
535	uridine	Nucleotide	Pyrimidine Metabolism, Uracil containing	-0.444339	-0.889, 0.0	0.0501733	0.320197
424	palmitate (16:0)	Lipid	Long Chain Saturated Fatty Acid	0.793691	-0.002, 1.589	0.0505146	0.320433
100009050	PAHSA (16:0/OH-18:0)	Lipid	Fatty Acid Hydroxyl Fatty Acid	1.16951	-0.013, 2.352	0.0522916	0.327756
100010934	diacylglycerol (14:0/18:1, 16:0/16:1) [1]*	Lipid	Diacylglycerol	-1.33064	-2.674, 0.013	0.0520529	0.327756
100015654	OAHSA (18:1/OH-18:0)	Lipid	Fatty Acid Hydroxyl Fatty Acid	1.02873	-0.017, 2.074	0.053438	0.32975
100021196	carboxymethylproline	Amino Acid	Urea cycle; Arginine and Proline Metabolism	-0.470517	-0.948, 0.007	0.0531901	0.32975
100021666	branched-chain, straight-chain, or cyclopropyl 10:1 fatty acid (1)*	Partially Characterized Molecules	Partially Characterized Molecules	-0.405526	-0.818, 0.007	0.0535491	0.32975
100000437	theophylline	Xenobiotics	Xanthine Metabolism	-0.620445	-1.26, 0.019	0.0566913	0.34308
100001462	1-stearoyl-GPG (18:0)	Lipid	Lysophospholipid	0.931782	-0.026, 1.89	0.0560995	0.34308
100001531	3-ureidoisobutyrate	Nucleotide	Pyrimidine Metabolism, Uracil containing	0.861253	-0.025, 1.748	0.056395	0.34308
181	laurate (12:0)	Lipid	Medium Chain Fatty Acid	-0.821291	-1.67, 0.027	0.057159	0.343934
100001590	isobutyrylglycine	Amino Acid	Leucine, Isoleucine and Valine Metabolism	-0.376915	-0.768, 0.014	0.058152	0.345588
100002102	N-acetyl-beta-alanine	Nucleotide	Pyrimidine Metabolism, Uracil containing	0.957165	-0.037, 1.951	0.0584185	0.345588
100019966	3-hydroxyoleate*	Lipid	Fatty Acid, Monohydroxy	1.25741	-0.048, 2.563	0.05838	0.345588
926	caproate (6:0)	Lipid	Medium Chain Fatty Acid	-0.834297	-1.704, 0.036	0.059363	0.348471
1749	acetylcholine	Lipid	Neurotransmitter	-1.52862	-3.126, 0.069	0.0598986	0.348471
100020217	N,N,N-trimethyl-alanylproline betaine (TMAP)	Amino Acid	Urea cycle; Arginine and Proline Metabolism	-1.52804	-3.123, 0.067	0.0596274	0.348471
100001778	1-linoleoyl-GPI (18:2)*	Lipid	Lysophospholipid	1.10099	-0.054, 2.256	0.0607672	0.349661
100015638	2-hydroxynervonate*	Lipid	Fatty Acid, Monohydroxy	0.664026	-0.032, 1.36	0.0606774	0.349661
100000869	sinapate	Xenobiotics	Food Component/Plant	0.795557	-0.041, 1.632	0.0612045	0.350263
100000708	isovalerate (i5:0)	Amino Acid	Leucine, Isoleucine and Valine Metabolism	-0.809971	-1.664, 0.045	0.0621169	0.351662
100001878	glycosyl-N-nervonoyl-sphingosine (d18:1/24:1)*	Lipid	Hexosylceramides (HCER)	-0.6037	-1.24, 0.033	0.0619688	0.351662
244	beta-alanine	Nucleotide	Pyrimidine Metabolism, Uracil containing	-0.572457	-1.178, 0.033	0.06263	0.352671
100001951	bilirubin (E,Z or Z,E)*	Cofactors and Vitamins	Hemoglobin and Porphyrin Metabolism	-0.805498	-1.659, 0.048	0.0632744	0.354404
100001425	5,6-dihydrouridine	Nucleotide	Pyrimidine Metabolism, Uracil containing	-0.421793	-0.872, 0.029	0.065143	0.362385
100002057	5-hydroxymethylfurfural	Xenobiotics	Food Component/Plant	-0.803946	-1.664, 0.056	0.0654912	0.362385
100005814	N-linoleoyltaurine*	Lipid	Endocannabinoid	0.678586	-0.048, 1.405	0.0657317	0.362385
100000292	protoporphyrin IX	Cofactors and Vitamins	Hemoglobin and Porphyrin Metabolism	0.626739	-0.045, 1.299	0.0661747	0.362927
180	linoleate (18:2n6)	Lipid	Long Chain Polyunsaturated Fatty Acid (n3 and n6)	1.18261	-0.088, 2.453	0.0665608	0.363148
1024	pantothenate	Cofactors and Vitamins	Pantothenate and CoA Metabolism	-0.399974	-0.831, 0.031	0.0675995	0.363148
1136	valerate (5:0)	Lipid	Short Chain Fatty Acid	-0.901144	-1.875, 0.073	0.0681438	0.363148
100001662	deoxycarnitine	Lipid	Carnitine Metabolism	0.445314	-0.036, 0.927	0.0682842	0.363148
100002990	oleoyl-linoleoyl-glycerol (18:1/18:2) [2]	Lipid	Diacylglycerol	0.996687	-0.077, 2.07	0.0672601	0.363148
100021519	2-methyl-proline	Amino Acid	Urea cycle; Arginine and Proline Metabolism	-0.97842	-2.035, 0.078	0.067885	0.363148
100001790	glycylisoleucine	Peptide	Dipeptide	0.447413	-0.039, 0.933	0.069462	0.367555
100002569	D-urobilin	Cofactors and Vitamins	Hemoglobin and Porphyrin Metabolism	-0.60258	-1.259, 0.054	0.0700778	0.368959
500	riboflavin (vitamin B2)	Cofactors and Vitamins	Riboflavin Metabolism	-0.34964	-0.732, 0.033	0.071398	0.372971
100000989	triethanolamine	Xenobiotics	Chemical	-0.419452	-0.879, 0.04	0.0716311	0.372971
100003072	enterodiol	Xenobiotics	Food Component/Plant	1.09751	-0.106, 2.301	0.0719022	0.372971
100020372	3-indoleglyoxylic acid	Xenobiotics	Food Component/Plant	-0.47239	-0.992, 0.047	0.0725245	0.374355
100001777	1-oleoyl-GPI (18:1)	Lipid	Lysophospholipid	1.35232	-0.144, 2.849	0.0743143	0.381722
100008930	oleate/vaccenate (18:1)	Lipid	Long Chain Monounsaturated Fatty Acid	1.14073	-0.125, 2.406	0.0749824	0.383284
100006367	3-hydroxyhexanoate	Lipid	Fatty Acid, Monohydroxy	-0.655175	-1.383, 0.073	0.0755357	0.384247
914	ribose	Carbohydrate	Pentose Metabolism	-0.559745	-1.189, 0.069	0.078654	0.385222
1022	picolinate	Amino Acid	Tryptophan Metabolism	-0.557914	-1.182, 0.066	0.077302	0.385222
100000870	saccharin	Xenobiotics	Food Component/Plant	-0.965338	-2.046, 0.115	0.0774476	0.385222
100001581	N-methylleucine	Amino Acid	Leucine, Isoleucine and Valine Metabolism	-0.814666	-1.729, 0.1	0.0783032	0.385222
100001614	hexadecanedioate (C16-DC)	Lipid	Fatty Acid, Dicarboxylate	-0.311028	-0.659, 0.037	0.077683	0.385222
100001983	sitostanol	Xenobiotics	Food Component/Plant	-0.776722	-1.644, 0.091	0.0768038	0.385222
100004035	nicotianamine	Xenobiotics	Food Component/Plant	0.888196	-0.107, 1.883	0.0777259	0.385222
100004272	biocytin	Cofactors and Vitamins	Biotin Metabolism	-0.355897	-0.755, 0.043	0.0780281	0.385222
100002227	4-cholesten-3-one	Lipid	Sterol	-0.769586	-1.641, 0.102	0.0807109	0.393465
100006005	5alpha-androstan-3alpha,17beta-diol monosulfate (2)	Lipid	Androgenic Steroids	0.373802	-0.05, 0.798	0.0811986	0.394019
100002107	palmitoyl sphingomyelin (d18:1/16:0)	Lipid	Sphingomyelins	-0.668964	-1.43, 0.092	0.0820399	0.396276
311	homocysteine	Amino Acid	Methionine, Cysteine, SAM and Taurine Metabolism	-0.402053	-0.864, 0.06	0.0852168	0.404204
395	lanosterol	Lipid	Sterol	-0.599875	-1.288, 0.089	0.0846036	0.404204
100001276	N-acetylisoleucine	Amino Acid	Leucine, Isoleucine and Valine Metabolism	-0.522164	-1.121, 0.077	0.0843774	0.404204
100022007	bilirubin degradation product, C17H18N2O4 (3)**	Partially Characterized Molecules	Partially Characterized Molecules	-0.863262	-1.855, 0.129	0.0850073	0.404204
100000054	5-hydroxylysine	Amino Acid	Lysine Metabolism	-0.665526	-1.439, 0.108	0.088267	0.405677
100000784	theanine	Xenobiotics	Food Component/Plant	-0.820441	-1.769, 0.128	0.0868665	0.405677
100001100	7-ketocholesterol	Lipid	Sterol	-0.509844	-1.098, 0.078	0.0860044	0.405677
100003452	hypericine	Xenobiotics	Food Component/Plant	-0.593874	-1.28, 0.093	0.0867478	0.405677
100003495	pinoresinol	Xenobiotics	Food Component/Plant	0.478066	-0.078, 1.034	0.0886094	0.405677
100008903	1,2-dilinoleoyl-GPC (18:2/18:2)	Lipid	Phosphatidylcholine (PC)	0.836489	-0.132, 1.805	0.0870925	0.405677
100020203	3-hydroxystachydrine*	Xenobiotics	Food Component/Plant	-1.48316	-3.203, 0.237	0.0876986	0.405677
100022006	bilirubin degradation product, C17H18N2O4 (2)**	Partially Characterized Molecules	Partially Characterized Molecules	-0.655766	-1.417, 0.106	0.0881212	0.405677
100001721	N2-acetyllysine	Amino Acid	Lysine Metabolism	-0.321636	-0.696, 0.053	0.0891071	0.40619
100004328	sphingomyelin (d18:1/14:0, d16:1/16:0)*	Lipid	Sphingomyelins	-0.407635	-0.885, 0.07	0.0905852	0.411148
100000299	xanthosine	Nucleotide	Purine Metabolism, (Hypo)Xanthine/Inosine containing	-0.553689	-1.203, 0.096	0.0911239	0.411818
875	p-aminobenzoate (PABA)	Xenobiotics	Benzoate Metabolism	0.554219	-0.101, 1.209	0.0932536	0.419641
100000251	flavin mononucleotide (FMN)	Cofactors and Vitamins	Riboflavin Metabolism	0.367469	-0.068, 0.803	0.0939922	0.421165
100019892	2-hydroxyarachidate*	Lipid	Fatty Acid, Monohydroxy	0.732479	-0.14, 1.605	0.0958616	0.427722
100006007	5alpha-androstan-3beta,17alpha-diol monosulfate (2)	Lipid	Androgenic Steroids	0.527485	-0.104, 1.159	0.0975459	0.4334
100001606	cholesterol sulfate	Lipid	Sterol	-0.212814	-0.469, 0.044	0.0994121	0.439404
100010834	3-methylglutarate/2-methylglutarate	Lipid	Fatty Acid, Dicarboxylate	0.315307	-0.065, 0.696	0.0997319	0.439404
100022009	bilirubin degradation product, C17H20N2O5 (2)**	Partially Characterized Molecules	Partially Characterized Molecules	-0.523886	-1.158, 0.11	0.10078	0.44217
100000838	hesperidin (hesperetin 7-rutinoside)	Xenobiotics	Food Component/Plant	-0.52499	-1.162, 0.112	0.101791	0.444754
100001293	N-acetylhistidine	Amino Acid	Histidine Metabolism	-0.262997	-0.583, 0.057	0.102367	0.445422
100001740	mannitol/sorbitol	Carbohydrate	Fructose, Mannose and Galactose Metabolism	-0.888878	-1.973, 0.195	0.103303	0.447645
100000263	imidazole lactate	Amino Acid	Histidine Metabolism	-0.416733	-0.927, 0.094	0.1049	0.449444
100001743	tryptophan betaine	Amino Acid	Tryptophan Metabolism	-0.689186	-1.534, 0.155	0.104926	0.449444
100001882	glycosyl-N-stearoyl-sphingosine (d18:1/18:0)	Lipid	Hexosylceramides (HCER)	-0.646561	-1.439, 0.146	0.104998	0.449444
182	quinolinate	Cofactors and Vitamins	Nicotinate and Nicotinamide Metabolism	0.774829	-0.18, 1.729	0.106584	0.452554
913	maltose	Carbohydrate	Glycogen Metabolism	-1.14416	-2.552, 0.264	0.106329	0.452554
100001086	N-(2-furoyl)glycine	Xenobiotics	Food Component/Plant	-0.387363	-0.866, 0.091	0.107608	0.455064
100002814	(R)-salsolinol	Amino Acid	Tyrosine Metabolism	-0.687818	-1.54, 0.165	0.108649	0.455883
100003169	isoleucylglycine	Peptide	Dipeptide	0.318413	-0.076, 0.713	0.108667	0.455883
112	3-hydroxy-3-methylglutarate	Lipid	Mevalonate Metabolism	0.689872	-0.17, 1.55	0.110539	0.45826
342	glycocholate	Lipid	Primary Bile Acid Metabolism	-0.621296	-1.396, 0.153	0.110508	0.45826
100003668	prolylalanine	Peptide	Dipeptide	0.46403	-0.114, 1.042	0.110368	0.45826
100000808	cysteine s-sulfate	Amino Acid	Methionine, Cysteine, SAM and Taurine Metabolism	-0.393894	-0.886, 0.098	0.11103	0.458487
193	N-acetylserotonin	Amino Acid	Tryptophan Metabolism	-0.574924	-1.296, 0.147	0.112889	0.461716
100002007	5alpha-androstan-3alpha,17alpha-diol disulfate	Lipid	Androgenic Steroids	-0.221059	-0.498, 0.056	0.112867	0.461716
100002028	androstenediol (3beta,17beta) monosulfate (1)	Lipid	Androgenic Steroids	0.433219	-0.111, 0.977	0.113127	0.461716
444	ornithine	Amino Acid	Urea cycle; Arginine and Proline Metabolism	-0.274671	-0.621, 0.072	0.114406	0.463343
100022014	bilirubin degradation product, C16H18N2O5 (3)**	Partially Characterized Molecules	Partially Characterized Molecules	0.597272	-0.155, 1.349	0.11402	0.463343
100001272	1-oleoyl-GPC (18:1)	Lipid	Lysophospholipid	1.10065	-0.29, 2.491	0.115215	0.464832
100001612	N-acetyl-aspartyl-glutamate (NAAG)	Amino Acid	Glutamate Metabolism	-0.541615	-1.228, 0.145	0.116121	0.464924
100002013	5alpha-pregnan-3beta,20alpha-diol monosulfate (1)	Lipid	Progestin Steroids	0.616696	-0.164, 1.397	0.115723	0.464924
339	glutarate (C5-DC)	Lipid	Fatty Acid, Dicarboxylate	-0.593161	-1.346, 0.16	0.116873	0.464954
100009061	(3'-5')-cytidylyladenosine	Nucleotide	Dinucleotide	0.403213	-0.109, 0.915	0.117054	0.464954
100009272	glycosyl-N-palmitoyl-sphingosine (d18:1/16:0)	Lipid	Hexosylceramides (HCER)	-0.55536	-1.263, 0.152	0.117894	0.464954
100015853	arachidoyl ethanolamide (20:0)*	Lipid	Endocannabinoid	-0.612956	-1.393, 0.167	0.117657	0.464954
1021	5-oxoproline	Amino Acid	Glutathione Metabolism	-0.356626	-0.815, 0.101	0.120953	0.47074
1023	sarcosine	Amino Acid	Glycine, Serine and Threonine Metabolism	0.767783	-0.219, 1.755	0.12115	0.47074
100002514	hydantoin-5-propionate	Amino Acid	Histidine Metabolism	0.447949	-0.127, 1.023	0.120457	0.47074
100006254	3,4-dihydroxyphenylacetate sulfate	Amino Acid	Tyrosine Metabolism	-0.722959	-1.65, 0.204	0.120351	0.47074
100002568	L-urobilin	Cofactors and Vitamins	Hemoglobin and Porphyrin Metabolism	-0.813383	-1.863, 0.236	0.12264	0.474152
100009413	4-acetamidobenzoate	Xenobiotics	Chemical	0.424582	-0.124, 0.973	0.122928	0.474152
100008998	gamma-tocopherol/beta-tocopherol	Cofactors and Vitamins	Tocopherol Metabolism	-0.53262	-1.224, 0.159	0.124591	0.478812
241	phenylpyruvate	Amino Acid	Phenylalanine Metabolism	-0.481665	-1.111, 0.147	0.1268	0.482024
100000837	diethanolamine	Xenobiotics	Chemical	-0.304478	-0.701, 0.092	0.126008	0.482024
100006370	3beta-hydroxy-5-cholestenoate	Lipid	Sterol	-0.682067	-1.572, 0.208	0.126704	0.482024
100021141	3-hydroxydecanoylcarnitine	Lipid	Fatty Acid Metabolism (Acyl Carnitine, Hydroxy)	-0.406287	-0.938, 0.126	0.127775	0.483984
100015637	2-hydroxybehenate	Lipid	Fatty Acid, Monohydroxy	0.636289	-0.201, 1.474	0.129759	0.489734
100015642	N-(2-hydroxypalmitoyl)-sphingosine (d18:1/16:0(2OH))	Lipid	Ceramides	-0.462018	-1.073, 0.149	0.13151	0.491065
100020371	N,N-dimethylalanine	Amino Acid	Alanine and Aspartate Metabolism	-1.021	-2.369, 0.327	0.1307	0.491065
100022003	bilirubin degradation product, C16H18N2O5 (1)**	Partially Characterized Molecules	Partially Characterized Molecules	0.399147	-0.129, 0.927	0.13147	0.491065
71	5-hydroxyindoleacetate	Amino Acid	Tryptophan Metabolism	0.534701	-0.185, 1.255	0.138198	0.491791
825	uracil	Nucleotide	Pyrimidine Metabolism, Uracil containing	-0.303628	-0.711, 0.104	0.137048	0.491791
925	heptanoate (7:0)	Lipid	Medium Chain Fatty Acid	-0.707226	-1.654, 0.239	0.135742	0.491791
1095	tryptamine	Amino Acid	Tryptophan Metabolism	-0.590612	-1.387, 0.206	0.138661	0.491791
1099	guanosine	Nucleotide	Purine Metabolism, Guanine containing	-0.550304	-1.287, 0.187	0.136035	0.491791
1668	taurodeoxycholate	Lipid	Secondary Bile Acid Metabolism	-0.600757	-1.406, 0.204	0.136398	0.491791
100000016	suberate (C8-DC)	Lipid	Fatty Acid, Dicarboxylate	0.33383	-0.113, 0.781	0.136173	0.491791
100000935	apigenin	Xenobiotics	Food Component/Plant	0.995755	-0.342, 2.333	0.137125	0.491791
100001526	malonylcarnitine	Lipid	Fatty Acid Synthesis	-0.489845	-1.151, 0.172	0.139177	0.491791
100001981	gamma-tocotrienol	Cofactors and Vitamins	Tocopherol Metabolism	-0.410958	-0.966, 0.144	0.138954	0.491791
100002015	5alpha-pregnan-diol disulfate	Lipid	Progestin Steroids	0.433535	-0.142, 1.009	0.132814	0.491791
100002284	2S,3R-dihydroxybutyrate	Lipid	Fatty Acid, Dihydroxy	-0.472514	-1.101, 0.156	0.133393	0.491791
100002769	argininate*	Amino Acid	Urea cycle; Arginine and Proline Metabolism	-0.375986	-0.881, 0.129	0.13693	0.491791
100021038	isoxanthohumol	Xenobiotics	Food Component/Plant	-0.58651	-1.375, 0.202	0.137508	0.491791
100021199	stigmastadienone	Lipid	Sterol	-0.362684	-0.845, 0.12	0.133844	0.491791
100021568	25-hydroxycholesterol sulfate	Lipid	Sterol	-0.356123	-0.835, 0.123	0.137695	0.491791
100001765	3-methyladipate	Lipid	Fatty Acid, Dicarboxylate	0.642348	-0.227, 1.511	0.139824	0.492171
100020879	phenylacetylaspartate	Peptide	Acetylated Peptides	-0.60598	-1.427, 0.215	0.14022	0.492171
100003239	N-palmitoyltaurine	Lipid	Endocannabinoid	0.341403	-0.123, 0.806	0.141718	0.495778
187	N('1)-acetylspermidine	Amino Acid	Polyamine Metabolism	-0.644015	-1.523, 0.235	0.143374	0.496818
100000800	indoleacrylate	Amino Acid	Tryptophan Metabolism	-0.511145	-1.214, 0.192	0.146262	0.496818
100000943	2-oleoylglycerol (18:1)	Lipid	Monoacylglycerol	0.751055	-0.274, 1.776	0.143171	0.496818
100001143	3-hydroxysuberate	Lipid	Fatty Acid, Monohydroxy	0.534168	-0.2, 1.268	0.145968	0.496818
100003183	leucylglutamine*	Peptide	Dipeptide	0.664129	-0.247, 1.576	0.145316	0.496818
100006190	2-acetamidophenol sulfate	Xenobiotics	Food Component/Plant	0.656616	-0.242, 1.555	0.144184	0.496818
100009261	ursodeoxycholate sulfate (1)	Lipid	Secondary Bile Acid Metabolism	0.412616	-0.154, 0.98	0.145772	0.496818
100015801	urolithin A	Xenobiotics	Bacterial/Fungal	1.16557	-0.433, 2.764	0.145	0.496818
100020417	N6,N6-dimethyllysine	Amino Acid	Lysine Metabolism	0.878052	-0.324, 2.08	0.144469	0.496818
100001679	3-dehydroshikimate	Xenobiotics	Food Component/Plant	-0.608868	-1.455, 0.237	0.150184	0.5085
815	tyrosine	Amino Acid	Tyrosine Metabolism	-0.184448	-0.442, 0.073	0.152196	0.508771
100001853	N2,N2-dimethylguanine	Nucleotide	Purine Metabolism, Guanine containing	-0.380408	-0.911, 0.15	0.151757	0.508771
100004635	methionine sulfone	Amino Acid	Methionine, Cysteine, SAM and Taurine Metabolism	-0.450492	-1.079, 0.178	0.151973	0.508771
100006171	eugenol sulfate	Xenobiotics	Food Component/Plant	-0.0447761	-0.107, 0.018	0.150942	0.508771
100000765	levulinate (4-oxovalerate)	Xenobiotics	Food Component/Plant	-0.415732	-0.998, 0.167	0.153555	0.510075
100021194	N-carboxymethylalanine	Xenobiotics	Food Component/Plant	-0.57598	-1.383, 0.231	0.153411	0.510075
100015838	eicosenoylcarnitine (C20:1)*	Lipid	Fatty Acid Metabolism (Acyl Carnitine, Monounsaturated)	-0.625752	-1.509, 0.257	0.156103	0.516907
100000258	glycerol 3-phosphate	Lipid	Glycerolipid Metabolism	0.449427	-0.185, 1.084	0.156629	0.517023
194	N-formylmethionine	Amino Acid	Methionine, Cysteine, SAM and Taurine Metabolism	-0.343703	-0.836, 0.148	0.16193	0.517289
252	succinate	Energy	TCA Cycle	-0.454585	-1.104, 0.195	0.161197	0.517289
1526	1-palmitoyl-2-oleoyl-GPE (16:0/18:1)	Lipid	Phosphatidylethanolamine (PE)	-0.765015	-1.865, 0.335	0.163651	0.517289
1629	taurochenodeoxycholate	Lipid	Primary Bile Acid Metabolism	-0.881662	-2.151, 0.387	0.164078	0.517289
100000007	carnitine	Lipid	Carnitine Metabolism	0.422852	-0.18, 1.026	0.160557	0.517289
100000631	N-oleoyl-sphingosine (d18:1/18:1)*	Lipid	Ceramides	0.524956	-0.228, 1.278	0.162722	0.517289
100000826	lactobionate	Carbohydrate	Disaccharides and Oligosaccharides	-0.619297	-1.504, 0.265	0.161077	0.517289
100001062	3-dehydrocholate	Lipid	Secondary Bile Acid Metabolism	-0.450764	-1.092, 0.191	0.159433	0.517289
100001064	glycolithocholate	Lipid	Secondary Bile Acid Metabolism	-0.33377	-0.807, 0.14	0.158283	0.517289
100001068	6-oxolithocholate	Lipid	Secondary Bile Acid Metabolism	-0.494914	-1.206, 0.217	0.163603	0.517289
100001229	stearidonate (18:4n3)	Lipid	Long Chain Polyunsaturated Fatty Acid (n3 and n6)	0.76952	-0.332, 1.871	0.161721	0.517289
100001315	p-cresol sulfate	Xenobiotics	Benzoate Metabolism	-0.634	-1.536, 0.268	0.159233	0.517289
100003070	enterolactone	Xenobiotics	Food Component/Plant	-0.840703	-2.048, 0.366	0.163165	0.517289
100004290	o-tyrosine	Amino Acid	Tyrosine Metabolism	0.989627	-0.428, 2.407	0.162194	0.517289
100005716	1-oleoyl-GPG (18:1)*	Lipid	Lysophospholipid	-0.471204	-1.138, 0.196	0.157602	0.517289
100001805	methylphosphate	Nucleotide	Purine and Pyrimidine Metabolism	0.613516	-0.273, 1.5	0.165911	0.518805
100003556	lysylalanine	Peptide	Dipeptide	0.671491	-0.3, 1.643	0.166074	0.518805
100004111	4-methylcatechol sulfate	Xenobiotics	Benzoate Metabolism	-0.662548	-1.621, 0.296	0.166068	0.518805
100015841	erucoylcarnitine (C22:1)*	Lipid	Fatty Acid Metabolism (Acyl Carnitine, Monounsaturated)	-0.404375	-0.99, 0.181	0.16653	0.518805
1221	creatine	Amino Acid	Creatine Metabolism	1.00073	-0.456, 2.457	0.168693	0.523992
100000269	glycerophosphorylcholine (GPC)	Lipid	Phospholipid Metabolism	0.603932	-0.278, 1.486	0.169882	0.526134
100001870	1-palmitoyl-2-linoleoyl-GPE (16:0/18:2)	Lipid	Phosphatidylethanolamine (PE)	-0.596079	-1.467, 0.275	0.170441	0.526319
1143	butyrate/isobutyrate (4:0)	Lipid	Short Chain Fatty Acid	-0.571123	-1.409, 0.267	0.17194	0.528346
100004321	2,8-quinolinediol sulfate	Xenobiotics	Food Component/Plant	-0.26597	-0.656, 0.125	0.172251	0.528346
100020416	delta-CEHC	Cofactors and Vitamins	Tocopherol Metabolism	-0.257993	-0.637, 0.121	0.172603	0.528346
100009329	ascorbic acid 2-sulfate	Cofactors and Vitamins	Ascorbate and Aldarate Metabolism	0.832233	-0.397, 2.062	0.174771	0.533432
1256	choline	Lipid	Phospholipid Metabolism	0.480053	-0.231, 1.191	0.175665	0.534612
100000282	N-acetylglutamate	Amino Acid	Glutamate Metabolism	-0.370907	-0.921, 0.18	0.176703	0.536221
254	3-hydroxybutyrate (BHBA)	Lipid	Ketone Bodies	0.721576	-0.356, 1.799	0.179358	0.538031
439	stearate (18:0)	Lipid	Long Chain Saturated Fatty Acid	0.625668	-0.31, 1.561	0.179692	0.538031
1082	N-acetylleucine	Amino Acid	Leucine, Isoleucine and Valine Metabolism	-0.315203	-0.787, 0.156	0.179855	0.538031
100010872	1-linoleoyl-2-linolenoyl-digalactosylglycerol (18:2/18:3)*	Lipid	Galactosyl Glycerolipids	0.459619	-0.226, 1.145	0.178836	0.538031
100021922	butyrylputrescine/isobutyrylputrescine	Amino Acid	Polyamine Metabolism	0.756816	-0.371, 1.885	0.178571	0.538031
235	2-hydroxyphenylacetate	Amino Acid	Phenylalanine Metabolism	0.402224	-0.2, 1.005	0.18057	0.538513
100021059	isourolithin A	Xenobiotics	Bacterial/Fungal	-0.31452	-0.786, 0.157	0.181038	0.538513
100000283	N-acetylmuramate	Carbohydrate	Aminosugar Metabolism	-0.384582	-0.963, 0.194	0.182531	0.539901
100001153	2-hydroxyadipate	Lipid	Fatty Acid, Dicarboxylate	0.615618	-0.31, 1.541	0.182182	0.539901
100001619	glycerophosphoglycerol	Lipid	Glycerolipid Metabolism	-0.314183	-0.789, 0.16	0.183962	0.542609
100002070	2-hydroxyglutarate	Lipid	Fatty Acid, Dicarboxylate	-0.425437	-1.07, 0.219	0.185266	0.544931
2051	methylsuccinate	Amino Acid	Leucine, Isoleucine and Valine Metabolism	-0.398013	-1.003, 0.207	0.186571	0.545643
100002773	solanidine	Xenobiotics	Food Component/Plant	-1.11453	-2.812, 0.583	0.187581	0.545643
100015988	isohyodeoxycholate	Lipid	Secondary Bile Acid Metabolism	-0.937813	-2.362, 0.486	0.186272	0.545643
100019962	1-myristoyl-GPI (14:0)*	Lipid	Lysophospholipid	0.328178	-0.172, 0.828	0.187552	0.545643
806	dimethylglycine	Amino Acid	Glycine, Serine and Threonine Metabolism	-0.286377	-0.724, 0.151	0.188551	0.546954
100001391	stearoylcarnitine (C18)	Lipid	Fatty Acid Metabolism (Acyl Carnitine, Long Chain Saturated)	-0.365481	-0.924, 0.193	0.189171	0.547245
100001103	glutamate, gamma-methyl ester	Amino Acid	Glutamate Metabolism	-0.362019	-0.917, 0.193	0.190597	0.549239
100004483	soyasaponin III	Xenobiotics	Food Component/Plant	-0.0178068	-0.045, 0.01	0.190904	0.549239
100000936	3-methyl-2-oxobutyrate	Amino Acid	Leucine, Isoleucine and Valine Metabolism	-0.429451	-1.1, 0.241	0.198324	0.569033
100001401	methylurea	Amino Acid	Urea cycle; Arginine and Proline Metabolism	-0.498961	-1.28, 0.283	0.19957	0.571053
1087	erucate (22:1n9)	Lipid	Long Chain Monounsaturated Fatty Acid	0.561647	-0.323, 1.447	0.202134	0.575264
100001491	N-glycolylneuraminate	Carbohydrate	Aminosugar Metabolism	-0.150277	-0.387, 0.086	0.201891	0.575264
100009396	1-linolenoyl-2-hexadecatrienoyl-galactosylglycerol (18:3/16:3)	Lipid	Galactosyl Glycerolipids	0.687034	-0.405, 1.779	0.206083	0.583349
100022015	bilirubin degradation product, C16H18N2O5 (4)**	Partially Characterized Molecules	Partially Characterized Molecules	0.626731	-0.369, 1.623	0.2059	0.583349
100002911	glycoursodeoxycholate	Lipid	Secondary Bile Acid Metabolism	-0.378654	-0.982, 0.225	0.207111	0.584686
100000983	3-hydroxypalmitate	Lipid	Fatty Acid, Monohydroxy	0.613249	-0.37, 1.597	0.209849	0.588661
100003119	N-oleoyltaurine	Lipid	Endocannabinoid	0.643676	-0.389, 1.677	0.210196	0.588661
100003542	histidylalanine	Peptide	Dipeptide	0.530253	-0.319, 1.379	0.209086	0.588661
100015854	behenoyl ethanolamide (22:0)*	Lipid	Endocannabinoid	-0.50347	-1.316, 0.309	0.212498	0.59353
100006642	glycodeoxycholate 3-sulfate	Lipid	Secondary Bile Acid Metabolism	-0.0528128	-0.138, 0.033	0.214244	0.595248
100020003	N-acetylglucosamine conjugate of C24H40O4 bile acid**	Partially Characterized Molecules	Partially Characterized Molecules	0.485583	-0.3, 1.271	0.213829	0.595248
100001274	N-acetylthreonine	Amino Acid	Glycine, Serine and Threonine Metabolism	-0.373441	-0.981, 0.234	0.215907	0.59672
100006203	acesulfame	Xenobiotics	Food Component/Plant	-0.251509	-0.66, 0.157	0.215831	0.59672
100021220	succinoyltaurine	Amino Acid	Methionine, Cysteine, SAM and Taurine Metabolism	0.420084	-0.267, 1.107	0.218813	0.603167
100003518	alanyllysine	Peptide	Dipeptide	0.602675	-0.39, 1.595	0.221782	0.609756
100002113	cysteine sulfinic acid	Amino Acid	Methionine, Cysteine, SAM and Taurine Metabolism	-0.229907	-0.611, 0.151	0.224333	0.614202
100009235	isovalerylphenylalanine	Amino Acid	Tyrosine Metabolism	0.561743	-0.369, 1.493	0.224566	0.614202
100000463	indolelactate	Amino Acid	Tryptophan Metabolism	-0.3469	-0.926, 0.232	0.227408	0.620365
100005391	3-(3-hydroxyphenyl)propionate sulfate	Xenobiotics	Benzoate Metabolism	-1.26228	-3.374, 0.85	0.228786	0.620907
100021329	(S)-a-amino-omega-caprolactam	Xenobiotics	Food Component/Plant	-0.313803	-0.838, 0.211	0.228297	0.620907
1141	4-hydroxyphenylpyruvate	Amino Acid	Tyrosine Metabolism	-0.336366	-0.902, 0.229	0.23076	0.623052
100004318	indolin-2-one	Xenobiotics	Food Component/Plant	-0.472683	-1.266, 0.321	0.230288	0.623052
1242	N1-methyladenosine	Nucleotide	Purine Metabolism, Adenine containing	-0.328523	-0.884, 0.227	0.233476	0.625515
2054	ethylmalonate	Amino Acid	Leucine, Isoleucine and Valine Metabolism	0.441051	-0.307, 1.189	0.235072	0.625515
100002094	gamma-CEHC	Cofactors and Vitamins	Tocopherol Metabolism	-0.33734	-0.908, 0.233	0.233863	0.625515
100003179	leucylalanine	Peptide	Dipeptide	0.706135	-0.492, 1.905	0.235237	0.625515
100006115	arabonate/xylonate	Carbohydrate	Pentose Metabolism	-0.420041	-1.132, 0.292	0.234942	0.625515
100020840	linolenoyl ethanolamide	Lipid	Endocannabinoid	0.492796	-0.338, 1.324	0.232459	0.625515
100002557	N-methylhydantoin	Amino Acid	Creatine Metabolism	-0.476562	-1.29, 0.336	0.237581	0.630157
100021488	feruloylquinate (4)	Xenobiotics	Food Component/Plant	-0.618568	-1.676, 0.439	0.238442	0.630854
893	arachidate (20:0)	Lipid	Long Chain Saturated Fatty Acid	0.574705	-0.418, 1.568	0.243477	0.63769
923	dihydroorotate	Nucleotide	Pyrimidine Metabolism, Orotate containing	0.346571	-0.255, 0.948	0.245485	0.63769
1110	N-acetylalanine	Amino Acid	Alanine and Aspartate Metabolism	0.329799	-0.239, 0.899	0.242704	0.63769
1248	thymidine 5'-monophosphate	Nucleotide	Pyrimidine Metabolism, Thymine containing	0.613806	-0.45, 1.678	0.244839	0.63769
100001769	N6-carboxyethyllysine	Amino Acid	Lysine Metabolism	0.306022	-0.222, 0.834	0.24287	0.63769
100002249	N-acetyl-cadaverine	Amino Acid	Lysine Metabolism	0.698466	-0.512, 1.909	0.244914	0.63769
100002417	2,3-dihydroxyisovalerate	Xenobiotics	Food Component/Plant	-0.429767	-1.174, 0.315	0.244652	0.63769
100006314	sphingomyelin (d17:1/16:0, d18:1/15:0, d16:1/17:0)*	Lipid	Sphingomyelins	0.716435	-0.528, 1.961	0.245871	0.63769
100009328	furaneol sulfate	Xenobiotics	Food Component/Plant	-0.362703	-0.995, 0.269	0.247228	0.639633
100000442	quinate	Xenobiotics	Food Component/Plant	-0.702792	-1.93, 0.525	0.24837	0.641013
100001635	ectoine	Xenobiotics	Chemical	-0.498636	-1.375, 0.378	0.251106	0.64649
100010874	1-palmitoyl-2-linoleoyl-digalactosylglycerol (16:0/18:2)*	Lipid	Galactosyl Glycerolipids	0.629387	-0.48, 1.738	0.252445	0.648352
340	glycine	Amino Acid	Glycine, Serine and Threonine Metabolism	-0.194838	-0.539, 0.149	0.253346	0.648454
100020819	glycoursodeoxycholic acid sulfate (1)	Lipid	Secondary Bile Acid Metabolism	-0.0565122	-0.156, 0.043	0.253716	0.648454
49	putrescine	Amino Acid	Polyamine Metabolism	0.674941	-0.524, 1.873	0.255988	0.652676
100001067	dehydrolithocholate	Lipid	Secondary Bile Acid Metabolism	-0.713251	-1.983, 0.556	0.257125	0.653993
249	carnosine	Amino Acid	Histidine Metabolism	-0.319968	-0.895, 0.255	0.261147	0.66008
480	proline	Amino Acid	Urea cycle; Arginine and Proline Metabolism	-0.199231	-0.558, 0.159	0.26198	0.66008
100009055	palmitoyl-linoleoyl-glycerol (16:0/18:2) [2]*	Lipid	Diacylglycerol	0.591886	-0.473, 1.657	0.262026	0.66008
100010878	1-linoleoyl-2-linolenoyl-galactosylglycerol (18:2/18:3)*	Lipid	Galactosyl Glycerolipids	0.483396	-0.385, 1.352	0.261284	0.66008
564	threonine	Amino Acid	Glycine, Serine and Threonine Metabolism	-0.195312	-0.549, 0.159	0.265421	0.667036
873	thiamin (vitamin B1)	Cofactors and Vitamins	Thiamine Metabolism	-0.353868	-0.996, 0.289	0.266353	0.667785
1134	urate	Nucleotide	Purine Metabolism, (Hypo)Xanthine/Inosine containing	-0.349852	-0.994, 0.294	0.272679	0.672439
100001278	10-heptadecenoate (17:1n7)	Lipid	Long Chain Monounsaturated Fatty Acid	0.4476	-0.376, 1.271	0.272548	0.672439
100001417	phenylacetylglutamine	Peptide	Acetylated Peptides	0.732224	-0.609, 2.074	0.27055	0.672439
100001987	5alpha-androstan-3beta,17beta-diol disulfate	Lipid	Androgenic Steroids	-0.302673	-0.859, 0.254	0.272295	0.672439
100005805	1-palmitoyl-GPS (16:0)*	Lipid	Lysophospholipid	0.752169	-0.629, 2.133	0.271558	0.672439
100006123	N-acetylhistamine	Amino Acid	Histidine Metabolism	0.564113	-0.469, 1.597	0.270383	0.672439
100020842	N,N-dimethyl-5-aminovalerate	Amino Acid	Lysine Metabolism	-0.596275	-1.686, 0.493	0.26913	0.672439
1869	2-hydroxyhippurate (salicylurate)	Xenobiotics	Benzoate Metabolism	0.472791	-0.403, 1.349	0.275892	0.67288
100000707	maleate	Lipid	Fatty Acid, Dicarboxylate	-0.194356	-0.553, 0.164	0.273993	0.67288
100001405	1-methylxanthine	Xenobiotics	Xanthine Metabolism	0.252242	-0.214, 0.719	0.274827	0.67288
100005383	N-methylpipecolate	Xenobiotics	Bacterial/Fungal	-0.575586	-1.642, 0.491	0.275722	0.67288
100006436	diethyl phosphate	Xenobiotics	Chemical	-0.266699	-0.761, 0.228	0.276053	0.67288
100003260	carboxyethyl-GABA	Amino Acid	Glutamate Metabolism	0.188666	-0.162, 0.539	0.276813	0.673174
100021333	calystegine A3	Xenobiotics	Food Component/Plant	0.530766	-0.457, 1.519	0.277937	0.674349
445	orotate	Nucleotide	Pyrimidine Metabolism, Orotate containing	0.491872	-0.427, 1.411	0.279651	0.674923
100009239	isocitric lactone	Energy	TCA Cycle	-0.627736	-1.802, 0.546	0.280096	0.674923
100020597	9,10-DiHOME sulfate	Lipid	Fatty Acid, Dihydroxy	0.390302	-0.339, 1.119	0.279593	0.674923
251	biotin	Cofactors and Vitamins	Biotin Metabolism	0.253874	-0.222, 0.73	0.281554	0.676887
1547	N-stearoyl-sphingosine (d18:1/18:0)*	Lipid	Ceramides	-0.727736	-2.095, 0.64	0.282299	0.677132
100002458	3-methylglutaconate	Amino Acid	Leucine, Isoleucine and Valine Metabolism	0.392518	-0.347, 1.132	0.283542	0.678566
240	3-(4-hydroxyphenyl)lactate	Amino Acid	Tyrosine Metabolism	0.389946	-0.35, 1.13	0.287004	0.683744
100022482	N-lactoyl phenylalanine	Amino Acid	Lactoyl Amino Acid	-0.30151	-0.874, 0.271	0.286936	0.683744
100001334	N-acetylproline	Amino Acid	Urea cycle; Arginine and Proline Metabolism	-0.344073	-1.0, 0.312	0.289457	0.688031
100001843	gamma-glutamylalanine	Peptide	Gamma-glutamyl Amino Acid	-0.330557	-0.968, 0.307	0.294333	0.697798
100020824	lithocholic acid sulfate (2)	Lipid	Secondary Bile Acid Metabolism	-0.983187	-2.881, 0.914	0.294891	0.697798
100001594	beta-hydroxyisovaleroylcarnitine	Amino Acid	Leucine, Isoleucine and Valine Metabolism	0.228921	-0.216, 0.673	0.297798	0.700107
100006633	4-hydroxyphenylacetate sulfate	Amino Acid	Tyrosine Metabolism	-0.440943	-1.297, 0.415	0.297457	0.700107
100010962	1-palmityl-GPE (O-16:0)*	Lipid	Lysoplasmalogen	0.0529511	-0.05, 0.156	0.297861	0.700107
100001501	oleoylcarnitine (C18:1)	Lipid	Fatty Acid Metabolism (Acyl Carnitine, Monounsaturated)	0.484401	-0.46, 1.429	0.299578	0.702573
136	cholate	Lipid	Primary Bile Acid Metabolism	0.923005	-0.9, 2.746	0.305726	0.70558
980	pentadecanoate (15:0)	Lipid	Long Chain Saturated Fatty Acid	0.527125	-0.523, 1.577	0.309849	0.70558
100000285	N-alpha-acetylornithine	Amino Acid	Urea cycle; Arginine and Proline Metabolism	-0.206544	-0.616, 0.203	0.307399	0.70558
100000487	glycylvaline	Peptide	Dipeptide	-0.185182	-0.548, 0.177	0.301622	0.70558
100001125	threonylphenylalanine	Peptide	Dipeptide	0.369873	-0.367, 1.107	0.309923	0.70558
100001181	docosapentaenoate (n3 DPA; 22:5n3)	Lipid	Long Chain Polyunsaturated Fatty Acid (n3 and n6)	-0.536056	-1.602, 0.53	0.309092	0.70558
100001208	1-methyl-4-imidazoleacetate	Amino Acid	Histidine Metabolism	-0.517517	-1.535, 0.5	0.303722	0.70558
100001950	bilirubin (E,E)*	Cofactors and Vitamins	Hemoglobin and Porphyrin Metabolism	-0.436141	-1.295, 0.423	0.304388	0.70558
100003065	digalactosylglycerol*	Lipid	Galactosyl Glycerolipids	-0.366969	-1.097, 0.363	0.30892	0.70558
100003160	glutaminylleucine	Peptide	Dipeptide	0.284912	-0.279, 0.849	0.307171	0.70558
100004089	2-hydroxydecanoate	Lipid	Fatty Acid, Monohydroxy	-0.175926	-0.527, 0.175	0.310178	0.70558
100009060	(3'-5')-adenylyluridine	Nucleotide	Dinucleotide	0.473674	-0.462, 1.409	0.305799	0.70558
100020242	diacetylspermidine*	Amino Acid	Polyamine Metabolism	-0.408684	-1.223, 0.406	0.310241	0.70558
100020992	cyclo(pro-sulfo-tyr)*	Peptide	Dipeptide	-0.251978	-0.75, 0.246	0.305874	0.70558
100000863	adipate (C6-DC)	Lipid	Fatty Acid, Dicarboxylate	0.219679	-0.221, 0.661	0.313595	0.711671
100000486	N6-formyllysine	Amino Acid	Lysine Metabolism	0.344872	-0.356, 1.046	0.319254	0.712392
100001256	N-acetylphenylalanine	Amino Acid	Phenylalanine Metabolism	-0.248904	-0.754, 0.256	0.318469	0.712392
100003588	phenylalanylglycine	Peptide	Dipeptide	0.388656	-0.4, 1.177	0.31852	0.712392
100005864	methyl glucopyranoside (alpha + beta)	Xenobiotics	Food Component/Plant	0.468807	-0.48, 1.418	0.317309	0.712392
100009237	2-acetamidobutanoate	Xenobiotics	Bacterial/Fungal	0.326515	-0.332, 0.985	0.315432	0.712392
100015855	lignoceroyl ethanolamide (24:0)*	Lipid	Endocannabinoid	-0.328565	-0.993, 0.336	0.316801	0.712392
100020893	2,3-dihydroxy-5-methylthio-4-pentenoate (DMTPA)*	Amino Acid	Methionine, Cysteine, SAM and Taurine Metabolism	0.396895	-0.41, 1.204	0.319325	0.712392
100022041	N,N-dimethyl-pro-pro	Peptide	Modified Peptides	-0.445924	-1.346, 0.454	0.315862	0.712392
503	serine	Amino Acid	Glycine, Serine and Threonine Metabolism	-0.143637	-0.437, 0.149	0.321051	0.71473
100021018	2-iminopiperidine	Xenobiotics	Chemical	-0.14576	-0.444, 0.153	0.322983	0.717514
100019978	octadecenedioate (C18:1-DC)	Lipid	Fatty Acid, Dicarboxylate	-0.316039	-0.965, 0.333	0.324558	0.719493
1231	dihomo-linoleate (20:2n6)	Lipid	Long Chain Polyunsaturated Fatty Acid (n3 and n6)	-0.519155	-1.594, 0.556	0.328185	0.719712
1254	glycerol	Lipid	Glycerolipid Metabolism	0.409179	-0.439, 1.257	0.328631	0.719712
1539	1-palmitoyl-2-oleoyl-GPC (16:0/18:1)	Lipid	Phosphatidylcholine (PC)	0.377401	-0.406, 1.161	0.329463	0.719712
100001108	3-methylxanthine	Xenobiotics	Xanthine Metabolism	-0.257039	-0.787, 0.273	0.326085	0.719712
100001148	5-hydroxyhexanoate	Lipid	Fatty Acid, Monohydroxy	-0.307294	-0.942, 0.327	0.326636	0.719712
100001502	gamma-glutamyl-2-aminobutyrate	Peptide	Gamma-glutamyl Amino Acid	0.50175	-0.541, 1.545	0.330025	0.719712
100001621	glycerophosphoinositol*	Lipid	Phospholipid Metabolism	0.32729	-0.353, 1.008	0.330156	0.719712
100004262	tridecanedioate (C13-DC)	Lipid	Fatty Acid, Dicarboxylate	0.275155	-0.293, 0.843	0.326985	0.719712
100022005	bilirubin degradation product, C17H18N2O4 (1)**	Partially Characterized Molecules	Partially Characterized Molecules	-0.527447	-1.626, 0.571	0.330808	0.719712
100009246	2-methylserine	Amino Acid	Glycine, Serine and Threonine Metabolism	-0.48948	-1.512, 0.533	0.332424	0.721736
100000265	kynurenine	Amino Acid	Tryptophan Metabolism	0.39523	-0.433, 1.224	0.334105	0.723894
512	taurine	Amino Acid	Methionine, Cysteine, SAM and Taurine Metabolism	0.576587	-0.636, 1.789	0.335608	0.724051
100001739	dihomo-linolenate (20:3n3 or n6)	Lipid	Long Chain Polyunsaturated Fatty Acid (n3 and n6)	-0.566862	-1.76, 0.626	0.335835	0.724051
100002856	glycyrrhetinate	Xenobiotics	Food Component/Plant	-0.625357	-1.943, 0.692	0.336316	0.724051
100003397	trimethylamine N-oxide	Lipid	Phospholipid Metabolism	-0.314356	-0.978, 0.35	0.337615	0.724051
100003641	valylglycine	Peptide	Dipeptide	0.210185	-0.233, 0.654	0.336968	0.724051
477	pristanate	Lipid	Fatty Acid, Branched	-0.273928	-0.858, 0.31	0.342038	0.731282
100001337	linolenate [alpha or gamma; (18:3n3 or 6)]	Lipid	Long Chain Polyunsaturated Fatty Acid (n3 and n6)	0.564771	-0.64, 1.77	0.342376	0.731282
935	sucrose	Carbohydrate	Disaccharides and Oligosaccharides	0.69358	-0.79, 2.177	0.343564	0.732334
100000773	3-hydroxyoctanoate	Lipid	Fatty Acid, Monohydroxy	-0.218433	-0.692, 0.255	0.349688	0.733509
100001018	p-cresol	Xenobiotics	Benzoate Metabolism	-0.391107	-1.236, 0.454	0.348485	0.733509
100001452	isovalerylglycine	Amino Acid	Leucine, Isoleucine and Valine Metabolism	-0.190256	-0.602, 0.222	0.349596	0.733509
100003869	taurohyodeoxycholic acid	Lipid	Secondary Bile Acid Metabolism	-0.371822	-1.177, 0.433	0.349222	0.733509
100006637	cholate sulfate	Lipid	Primary Bile Acid Metabolism	-0.326131	-1.029, 0.376	0.346788	0.733509
100020496	sulfate of piperine metabolite C16H19NO3 (2)*	Xenobiotics	Food Component/Plant	0.201501	-0.233, 0.636	0.347688	0.733509
100021253	(15:3)-anacardic acid	Xenobiotics	Food Component/Plant	0.476466	-0.55, 1.503	0.346832	0.733509
100022120	oxindolylalanine	Amino Acid	Tryptophan Metabolism	0.20224	-0.236, 0.64	0.349145	0.733509
278	cysteinylglycine	Amino Acid	Glutathione Metabolism	0.23497	-0.278, 0.748	0.353186	0.735785
798	adenosine	Nucleotide	Purine Metabolism, Adenine containing	-0.479191	-1.529, 0.571	0.354966	0.735785
1215	N-acetylglucosaminylasparagine	Carbohydrate	Aminosugar Metabolism	-0.269951	-0.86, 0.32	0.353978	0.735785
1239	2-hydroxystearate	Lipid	Fatty Acid, Monohydroxy	-0.574667	-1.832, 0.682	0.354125	0.735785
100001253	N-acetylglutamine	Amino Acid	Glutamate Metabolism	-0.205996	-0.657, 0.245	0.354947	0.735785
100001733	hexanoylglutamine	Lipid	Fatty Acid Metabolism (Acyl Glutamine)	-0.273704	-0.87, 0.323	0.352249	0.735785
376	isoleucine	Amino Acid	Leucine, Isoleucine and Valine Metabolism	-0.128315	-0.412, 0.155	0.358721	0.737619
100000295	tartarate	Xenobiotics	Food Component/Plant	-0.459066	-1.473, 0.555	0.358631	0.737619
100001063	7-ketodeoxycholate	Lipid	Secondary Bile Acid Metabolism	0.743996	-0.893, 2.381	0.356999	0.737619
100003609	tryptophylglycine	Peptide	Dipeptide	0.412996	-0.501, 1.327	0.359442	0.737619
100009064	(3'-5')-guanylylcytidine	Nucleotide	Dinucleotide	0.328598	-0.399, 1.056	0.360053	0.737619
100010846	propionylglutamine	Amino Acid	Glutamate Metabolism	-0.440564	-1.416, 0.535	0.35995	0.737619
331	gamma-glutamylglutamate	Peptide	Gamma-glutamyl Amino Acid	0.23294	-0.303, 0.769	0.37812	0.73773
382	3-sulfo-alanine	Amino Acid	Methionine, Cysteine, SAM and Taurine Metabolism	-0.171696	-0.568, 0.225	0.379582	0.73773
491	pyridoxal	Cofactors and Vitamins	Vitamin B6 Metabolism	-0.193925	-0.636, 0.248	0.373097	0.73773
891	margarate (17:0)	Lipid	Long Chain Saturated Fatty Acid	0.411847	-0.521, 1.345	0.370656	0.73773
922	N-stearoyl-sphinganine (d18:0/18:0)*	Lipid	Dihydroceramides	0.489608	-0.633, 1.612	0.376179	0.73773
1108	N-carbamoylaspartate	Nucleotide	Pyrimidine Metabolism, Orotate containing	0.392155	-0.496, 1.28	0.370365	0.73773
100000039	methionine sulfoxide	Amino Acid	Methionine, Cysteine, SAM and Taurine Metabolism	0.169199	-0.217, 0.555	0.374009	0.73773
100000086	ciliatine (2-aminoethylphosphonate)	Xenobiotics	Food Component/Plant	0.428784	-0.529, 1.387	0.364207	0.73773
100000096	4-guanidinobutanoate	Amino Acid	Guanidino and Acetamido Metabolism	-0.218831	-0.715, 0.277	0.370956	0.73773
100001092	trigonelline (N'-methylnicotinate)	Cofactors and Vitamins	Nicotinate and Nicotinamide Metabolism	0.526269	-0.669, 1.721	0.371696	0.73773
100001219	daidzein	Xenobiotics	Food Component/Plant	-0.592624	-1.937, 0.752	0.371197	0.73773
100001271	1-stearoyl-GPC (18:0)	Lipid	Lysophospholipid	-0.512038	-1.654, 0.63	0.363342	0.73773
100001624	3-(3-hydroxyphenyl)propionate	Xenobiotics	Benzoate Metabolism	-0.964823	-3.147, 1.218	0.369977	0.73773
100002083	N-methyltryptophan	Amino Acid	Tryptophan Metabolism	-0.312129	-1.029, 0.405	0.376999	0.73773
100002132	N1,N12-diacetylspermine	Amino Acid	Polyamine Metabolism	0.515618	-0.666, 1.697	0.376102	0.73773
100002776	rosmarinate	Xenobiotics	Food Component/Plant	0.440792	-0.538, 1.419	0.361006	0.73773
100003472	(15:2)-anacardic acid	Xenobiotics	Food Component/Plant	0.678014	-0.882, 2.238	0.37784	0.73773
100004295	2-piperidinone	Xenobiotics	Food Component/Plant	0.565526	-0.731, 1.862	0.37626	0.73773
100005384	O-sulfo-tyrosine	Xenobiotics	Chemical	-0.42568	-1.388, 0.537	0.369832	0.73773
100005944	narirutin (naringenin 7-O-rutinoside)	Xenobiotics	Food Component/Plant	-0.178361	-0.59, 0.234	0.379724	0.73773
100008933	3-hydroxystearate	Lipid	Fatty Acid, Monohydroxy	0.767818	-0.966, 2.501	0.368993	0.73773
100009392	1,2-dilinolenoyl-digalactosylglycerol (18:3/18:3)	Lipid	Galactosyl Glycerolipids	0.465862	-0.577, 1.508	0.3649	0.73773
100010911	butyrylglutamine/isobutyrylglutamine	Amino Acid	Glutamate Metabolism	0.205133	-0.267, 0.677	0.378183	0.73773
100015832	behenoylcarnitine (C22)*	Lipid	Fatty Acid Metabolism (Acyl Carnitine, Long Chain Saturated)	-0.282703	-0.935, 0.369	0.378945	0.73773
100020343	tetradecadienoate (14:2)*	Lipid	Long Chain Polyunsaturated Fatty Acid (n3 and n6)	0.37116	-0.464, 1.206	0.367251	0.73773
100020845	tauroursodeoxycholic acid sulfate (2)	Lipid	Secondary Bile Acid Metabolism	-0.120763	-0.397, 0.156	0.375331	0.73773
100020850	tetrahydrocortisol disulfate	Lipid	Corticosteroids	-0.215936	-0.698, 0.267	0.364198	0.73773
100021375	3-hydroxymargarate	Lipid	Fatty Acid, Monohydroxy	0.365363	-0.454, 1.184	0.365687	0.73773
100003185	leucylglycine	Peptide	Dipeptide	0.279343	-0.367, 0.926	0.380504	0.737883
100001007	ribonate	Carbohydrate	Pentose Metabolism	-0.36433	-1.211, 0.482	0.382529	0.737902
100006369	N-carbamoylalanine	Amino Acid	Alanine and Aspartate Metabolism	0.276026	-0.365, 0.918	0.382616	0.737902
100008954	palmitoyl dihydrosphingomyelin (d18:0/16:0)*	Lipid	Dihydrosphingomyelins	-0.253014	-0.839, 0.333	0.381351	0.737902
100015737	ceramide (d18:1/17:0, d17:1/18:0)*	Lipid	Ceramides	-0.703739	-2.343, 0.935	0.383645	0.738534
100021467	pentose acid*	Partially Characterized Molecules	Partially Characterized Molecules	-0.435793	-1.454, 0.582	0.384922	0.739641
100000827	1-palmitoylglycerol (16:0)	Lipid	Monoacylglycerol	0.108332	-0.148, 0.365	0.391064	0.750073
100002129	pregnenolone sulfate	Lipid	Pregnenolone Steroids	-0.307367	-1.037, 0.422	0.392225	0.750932
100006644	taurodeoxycholic acid 3-sulfate	Lipid	Secondary Bile Acid Metabolism	-0.029652	-0.1, 0.041	0.393409	0.751832
1083	N-acetylmethionine	Amino Acid	Methionine, Cysteine, SAM and Taurine Metabolism	-0.292703	-0.992, 0.406	0.395184	0.752451
100001314	gamma-glutamylthreonine	Peptide	Gamma-glutamyl Amino Acid	-0.188458	-0.639, 0.262	0.395876	0.752451
100003109	2-oxindole-3-acetate	Xenobiotics	Food Component/Plant	-0.326065	-1.103, 0.451	0.394458	0.752451
100015835	cerotoylcarnitine (C26)*	Lipid	Fatty Acid Metabolism (Acyl Carnitine, Long Chain Saturated)	-0.139661	-0.478, 0.199	0.402109	0.76292
100001657	glycolithocholate sulfate*	Lipid	Secondary Bile Acid Metabolism	-0.324599	-1.113, 0.464	0.403358	0.763914
100020536	4-ethylcatechol sulfate	Xenobiotics	Benzoate Metabolism	-0.168044	-0.578, 0.242	0.40487	0.765401
100015968	carotene diol (3)	Cofactors and Vitamins	Vitamin A Metabolism	0.371133	-0.536, 1.278	0.405879	0.765932
74	guanosine-2',3'-cyclic monophosphate	Nucleotide	Purine Metabolism, Guanine containing	0.319881	-0.48, 1.12	0.416786	0.766901
297	sphingosine	Lipid	Sphingosines	0.295092	-0.447, 1.037	0.419192	0.766901
344	guanidinoacetate	Amino Acid	Creatine Metabolism	0.635571	-0.977, 2.248	0.423143	0.766901
1133	tyramine	Amino Acid	Tyrosine Metabolism	0.382486	-0.558, 1.323	0.409009	0.766901
100000447	gentisate	Amino Acid	Tyrosine Metabolism	-0.3043	-1.053, 0.445	0.409422	0.766901
100000458	homoserine	Amino Acid	Glycine, Serine and Threonine Metabolism	-0.210243	-0.736, 0.316	0.416607	0.766901
100001065	taurolithocholate	Lipid	Secondary Bile Acid Metabolism	-0.256861	-0.906, 0.392	0.421559	0.766901
100001226	I-urobilinogen	Cofactors and Vitamins	Hemoglobin and Porphyrin Metabolism	1.00224	-1.479, 3.484	0.412071	0.766901
100001468	N1-methyl-2-pyridone-5-carboxamide	Cofactors and Vitamins	Nicotinate and Nicotinamide Metabolism	-0.277414	-0.973, 0.418	0.417571	0.766901
100001485	gamma-glutamylisoleucine*	Peptide	Gamma-glutamyl Amino Acid	-0.214533	-0.758, 0.329	0.422475	0.766901
100001658	taurolithocholate 3-sulfate	Lipid	Secondary Bile Acid Metabolism	0.267048	-0.397, 0.931	0.414145	0.766901
100001810	dimethylarginine (SDMA + ADMA)	Amino Acid	Urea cycle; Arginine and Proline Metabolism	0.304842	-0.468, 1.078	0.423014	0.766901
100002403	tetrahydrocortisone	Lipid	Corticosteroids	0.222784	-0.326, 0.772	0.409628	0.766901
100002875	1-(1-enyl-palmitoyl)-GPC (P-16:0)*	Lipid	Lysoplasmalogen	0.137084	-0.207, 0.481	0.418309	0.766901
100003286	ponciretin	Xenobiotics	Food Component/Plant	-0.464947	-1.611, 0.681	0.409891	0.766901
100004322	2-aminophenol sulfate	Xenobiotics	Food Component/Plant	0.515985	-0.771, 1.802	0.415246	0.766901
100004535	2-methylbutyrylphenylalanine	Xenobiotics	Benzoate Metabolism	0.439997	-0.654, 1.534	0.414153	0.766901
100004542	2-aminoheptanoate	Lipid	Fatty Acid, Amino	0.362372	-0.553, 1.277	0.421068	0.766901
100005463	N-acetylmethionine sulfoxide	Amino Acid	Methionine, Cysteine, SAM and Taurine Metabolism	0.244912	-0.362, 0.852	0.412777	0.766901
100010940	diacylglycerol (16:1/18:2 [2], 16:0/18:3 [1])*	Lipid	Diacylglycerol	0.273275	-0.419, 0.965	0.422359	0.766901
100015846	nervonoylcarnitine (C24:1)*	Lipid	Fatty Acid Metabolism (Acyl Carnitine, Monounsaturated)	-0.228435	-0.8, 0.343	0.416649	0.766901
100020504	sulfate of piperine metabolite C18H21NO3 (3)*	Xenobiotics	Food Component/Plant	0.340367	-0.521, 1.201	0.421891	0.766901
100020513	N-acetylhomocitrulline	Amino Acid	Urea cycle; Arginine and Proline Metabolism	0.220995	-0.332, 0.774	0.41692	0.766901
100000008	benzoate	Xenobiotics	Benzoate Metabolism	-0.250414	-0.888, 0.387	0.424764	0.767303
100002241	7-methylurate	Xenobiotics	Xanthine Metabolism	-0.326436	-1.158, 0.505	0.424822	0.767303
100000015	xanthurenate	Amino Acid	Tryptophan Metabolism	-0.470394	-1.683, 0.742	0.43031	0.769311
100000841	oxalate (ethanedioate)	Cofactors and Vitamins	Ascorbate and Aldarate Metabolism	0.38204	-0.602, 1.366	0.430317	0.769311
100001816	deoxymugineic acid	Xenobiotics	Food Component/Plant	0.493717	-0.778, 1.765	0.430064	0.769311
100004125	N-propionylmethionine	Amino Acid	Methionine, Cysteine, SAM and Taurine Metabolism	-0.329211	-1.177, 0.519	0.430168	0.769311
100004327	1-stearoyl-GPS (18:0)*	Lipid	Lysophospholipid	-0.324738	-1.157, 0.507	0.427768	0.769311
100015845	docosahexaenoylcarnitine (C22:6)*	Lipid	Fatty Acid Metabolism (Acyl Carnitine, Polyunsaturated)	-0.454253	-1.624, 0.716	0.430053	0.769311
415	methionine	Amino Acid	Methionine, Cysteine, SAM and Taurine Metabolism	-0.145903	-0.524, 0.233	0.433376	0.769552
100002606	N-carbamoylsarcosine	Amino Acid	Creatine Metabolism	-0.23462	-0.843, 0.373	0.432887	0.769552
100010941	linoleoyl-linoleoyl-glycerol (18:2/18:2) [1]*	Lipid	Diacylglycerol	-0.611846	-2.192, 0.968	0.431288	0.769552
100020715	heptadecatrienoate (17:3)*	Lipid	Long Chain Polyunsaturated Fatty Acid (n3 and n6)	-0.348873	-1.253, 0.555	0.432823	0.769552
1053	3-ureidopropionate	Nucleotide	Pyrimidine Metabolism, Uracil containing	-0.50392	-1.818, 0.81	0.435643	0.770894
100001072	12-dehydrocholate	Lipid	Secondary Bile Acid Metabolism	0.612269	-0.999, 2.224	0.439988	0.770894
100001429	1-margaroylglycerol (17:0)	Lipid	Monoacylglycerol	-0.247081	-0.897, 0.403	0.439552	0.770894
100002144	secoisolariciresinol	Xenobiotics	Food Component/Plant	0.527282	-0.858, 1.913	0.439221	0.770894
100005258	2,4-dihydroxyhydrocinnamate	Xenobiotics	Benzoate Metabolism	0.19474	-0.315, 0.705	0.437549	0.770894
100006022	diosmetin	Xenobiotics	Food Component/Plant	0.478147	-0.769, 1.725	0.435807	0.770894
100010869	2,3-dihydroxy-2-methylbutyrate	Amino Acid	Leucine, Isoleucine and Valine Metabolism	-0.807645	-2.917, 1.302	0.436458	0.770894
100021839	2-methoxyhydroquinone sulfate (1)	Xenobiotics	Benzoate Metabolism	-0.385495	-1.399, 0.628	0.439384	0.770894
363	myo-inositol	Lipid	Inositol Metabolism	0.283215	-0.468, 1.035	0.443644	0.772651
100001266	N-acetylarginine	Amino Acid	Urea cycle; Arginine and Proline Metabolism	-0.258764	-0.945, 0.427	0.443282	0.772651
100002887	eriodictyol	Xenobiotics	Food Component/Plant	-0.179881	-0.655, 0.296	0.441832	0.772651
100004575	N2,N5-diacetylornithine	Amino Acid	Urea cycle; Arginine and Proline Metabolism	-0.1415	-0.517, 0.234	0.443926	0.772651
298	2'-deoxycytidine 5'-monophosphate	Nucleotide	Pyrimidine Metabolism, Cytidine containing	0.279425	-0.47, 1.029	0.448588	0.772919
338	gluconate	Xenobiotics	Food Component/Plant	0.397133	-0.681, 1.475	0.453651	0.772919
2029	azelate (C9-DC)	Lipid	Fatty Acid, Dicarboxylate	0.201738	-0.356, 0.759	0.461794	0.772919
2070	epicatechin	Xenobiotics	Food Component/Plant	0.157256	-0.276, 0.59	0.460258	0.772919
100000115	diaminopimelate	Xenobiotics	Bacterial/Fungal	-0.413474	-1.548, 0.721	0.45868	0.772919
100000449	3,4-dihydroxyphenylacetate	Amino Acid	Tyrosine Metabolism	-0.464594	-1.74, 0.811	0.458818	0.772919
100001150	propionylglycine	Lipid	Fatty Acid Metabolism (also BCAA Metabolism)	0.464434	-0.809, 1.738	0.458313	0.772919
100001151	butyrylglycine	Lipid	Fatty Acid Metabolism (also BCAA Metabolism)	0.181017	-0.316, 0.678	0.458805	0.772919
100001287	epiandrosterone sulfate	Lipid	Androgenic Steroids	-0.322833	-1.195, 0.549	0.451617	0.772919
100001400	1-methylurate	Xenobiotics	Xanthine Metabolism	-0.28622	-1.064, 0.491	0.454136	0.772919
100001402	5-acetylamino-6-formylamino-3-methyluracil	Xenobiotics	Xanthine Metabolism	-0.348104	-1.291, 0.595	0.452662	0.772919
100001495	pantetheine	Cofactors and Vitamins	Pantothenate and CoA Metabolism	-0.332684	-1.223, 0.558	0.447413	0.772919
100001988	5alpha-pregnan-3beta,20alpha-diol disulfate	Lipid	Progestin Steroids	0.224104	-0.378, 0.826	0.44912	0.772919
100002125	11-ketoetiocholanolone sulfate	Lipid	Androgenic Steroids	-0.261316	-0.974, 0.451	0.455652	0.772919
100002344	(12 or 13)-methylmyristate (a15:0 or i15:0)	Lipid	Fatty Acid, Branched	0.215513	-0.37, 0.801	0.454026	0.772919
100002914	3-(4-hydroxyphenyl)propionate	Xenobiotics	Benzoate Metabolism	0.409443	-0.71, 1.529	0.457129	0.772919
100003734	bufotenine	Xenobiotics	Food Component/Plant	-0.101831	-0.373, 0.17	0.445474	0.772919
100005945	acetylagmatine	Amino Acid	Polyamine Metabolism	-0.324529	-1.191, 0.542	0.446243	0.772919
100009058	(3'-5')-uridylyluridine	Nucleotide	Dinucleotide	0.249361	-0.434, 0.932	0.457729	0.772919
100010879	1,2-dilinoleoyl-galactosylglycerol (18:2/18:2)*	Lipid	Galactosyl Glycerolipids	-0.327908	-1.233, 0.578	0.461414	0.772919
100015731	N-palmitoyl-heptadecasphingosine (d17:1/16:0)*	Lipid	Ceramides	-0.277163	-1.04, 0.486	0.459924	0.772919
100020487	N-acetyl-isoputreanine	Amino Acid	Polyamine Metabolism	0.445703	-0.788, 1.679	0.46243	0.772919
100020707	1-linolenoyl-sulfoquinovopyranosyl-glycerol (18:3)*	Lipid	Monoacylglycerol	0.0885219	-0.156, 0.333	0.462235	0.772919
100021252	ginkgolic acid C15:1	Xenobiotics	Food Component/Plant	0.483916	-0.849, 1.817	0.460253	0.772919
100021654	ala-leu-ala	Peptide	Polypeptide	0.20094	-0.348, 0.75	0.456776	0.772919
100000409	2-isopropylmalate	Xenobiotics	Food Component/Plant	-0.298907	-1.129, 0.531	0.463866	0.774091
100015735	ceramide (d18:1/14:0, d16:1/16:0)*	Lipid	Ceramides	-0.22248	-0.843, 0.398	0.465788	0.776067
100021223	hexanoyltaurine	Lipid	Endocannabinoid	-0.249648	-0.948, 0.449	0.467152	0.777111
826	xylose	Carbohydrate	Pentose Metabolism	-0.329665	-1.255, 0.595	0.468475	0.778082
100001451	valerylglycine	Lipid	Fatty Acid Metabolism (Acyl Glycine)	-0.169294	-0.648, 0.31	0.472268	0.781943
100003073	secoisolariciresinol diglucoside	Xenobiotics	Food Component/Plant	0.271145	-0.496, 1.039	0.472301	0.781943
100003151	linoleoylcarnitine (C18:2)*	Lipid	Fatty Acid Metabolism (Acyl Carnitine, Polyunsaturated)	0.211744	-0.39, 0.813	0.47396	0.781943
100010942	linoleoyl-linoleoyl-glycerol (18:2/18:2) [2]*	Lipid	Diacylglycerol	0.387353	-0.714, 1.489	0.474264	0.781943
100021840	2-methoxyhydroquinone sulfate (2)	Xenobiotics	Benzoate Metabolism	-0.166501	-0.64, 0.307	0.474512	0.781943
100005346	coprostanol	Lipid	Sterol	-0.310258	-1.202, 0.582	0.47903	0.784917
100020215	N-methylhydroxyproline**	Amino Acid	Urea cycle; Arginine and Proline Metabolism	0.371995	-0.698, 1.442	0.479072	0.784917
100020729	(3'-5')-uridylylcytidine*	Nucleotide	Dinucleotide	0.235744	-0.441, 0.913	0.478416	0.784917
100021372	2-hydroxy-4-(methylthio)butanoic acid	Amino Acid	Methionine, Cysteine, SAM and Taurine Metabolism	-0.399443	-1.548, 0.75	0.479299	0.784917
100003695	mannonate*	Xenobiotics	Food Component/Plant	0.34931	-0.66, 1.359	0.481358	0.787066
100002067	pregnenediol sulfate (C21H34O5S)*	Lipid	Pregnenolone Steroids	0.403812	-0.782, 1.59	0.48818	0.79656
100010896	2'-O-methyluridine	Nucleotide	Pyrimidine Metabolism, Uracil containing	-0.278043	-1.095, 0.539	0.488678	0.79656
100008920	sphingomyelin (d18:1/17:0, d17:1/18:0, d19:1/16:0)	Lipid	Sphingomyelins	0.247871	-0.482, 0.978	0.489496	0.79666
100020578	4-allylcatechol sulfate	Xenobiotics	Benzoate Metabolism	-0.15085	-0.596, 0.294	0.490468	0.797011
482	lactate	Carbohydrate	Glycolysis, Gluconeogenesis, and Pyruvate Metabolism	0.30577	-0.615, 1.227	0.498976	0.798513
1124	citrate	Energy	TCA Cycle	0.259013	-0.519, 1.037	0.497695	0.798513
100000125	2'-deoxycytidine	Nucleotide	Pyrimidine Metabolism, Cytidine containing	-0.239878	-0.955, 0.476	0.49494	0.798513
100001632	formononetin	Xenobiotics	Food Component/Plant	-0.516593	-2.066, 1.032	0.497152	0.798513
100003365	hydroxymethylpyrimidine	Cofactors and Vitamins	Thiamine Metabolism	-0.254559	-1.015, 0.506	0.495435	0.798513
100003600	(15:0)-anacardic acid	Xenobiotics	Food Component/Plant	-0.350724	-1.4, 0.698	0.496164	0.798513
100004644	1-methylhypoxanthine	Nucleotide	Purine Metabolism, (Hypo)Xanthine/Inosine containing	0.26695	-0.536, 1.07	0.498408	0.798513
100009063	(3'-5')-cytidylylguanosine	Nucleotide	Dinucleotide	0.147037	-0.295, 0.589	0.49852	0.798513
100010875	1-palmitoyl-2-linolenoyl-digalactosylglycerol (16:0/18:3)	Lipid	Galactosyl Glycerolipids	0.254395	-0.511, 1.02	0.498863	0.798513
100021647	isoursodeoxycholate sulfate (1)	Lipid	Secondary Bile Acid Metabolism	-0.260325	-1.037, 0.516	0.494829	0.798513
100004182	3beta-hydroxy-5-cholenoate	Lipid	Secondary Bile Acid Metabolism	-0.228496	-0.92, 0.463	0.500929	0.799209
100021256	3,5-dihydroxyphenylpropionate	Xenobiotics	Benzoate Metabolism	0.597233	-1.209, 2.404	0.500826	0.799209
381	2-aminoadipate	Amino Acid	Lysine Metabolism	0.193791	-0.4, 0.788	0.506534	0.800709
460	phenylalanine	Amino Acid	Phenylalanine Metabolism	-0.0872458	-0.358, 0.184	0.511754	0.800709
892	nonadecanoate (19:0)	Lipid	Long Chain Saturated Fatty Acid	0.313159	-0.654, 1.28	0.509589	0.800709
1001	trans-4-hydroxyproline	Amino Acid	Urea cycle; Arginine and Proline Metabolism	-0.146634	-0.593, 0.3	0.503802	0.800709
1235	gamma-glutamylhistidine	Peptide	Gamma-glutamyl Amino Acid	0.180085	-0.372, 0.732	0.506723	0.800709
100000406	ribitol	Carbohydrate	Pentose Metabolism	-0.165342	-0.675, 0.345	0.509192	0.800709
100000701	estriol 3-sulfate	Lipid	Estrogenic Steroids	0.0758017	-0.159, 0.31	0.510255	0.800709
100001300	alpha-hydroxyisovalerate	Amino Acid	Leucine, Isoleucine and Valine Metabolism	-0.351535	-1.434, 0.731	0.508411	0.800709
100001398	3,7-dimethylurate	Xenobiotics	Xanthine Metabolism	0.216783	-0.452, 0.886	0.509307	0.800709
100003484	ursolic acid	Xenobiotics	Food Component/Plant	-0.809175	-3.297, 1.679	0.507783	0.800709
100010926	linoleoyl-linolenoyl-glycerol (18:2/18:3) [1]*	Lipid	Diacylglycerol	0.53675	-1.114, 2.188	0.507938	0.800709
100021655	ala-ile-ala	Peptide	Polypeptide	-0.172942	-0.702, 0.356	0.505729	0.800709
100022480	N-lactoyl leucine	Amino Acid	Lactoyl Amino Acid	-0.195459	-0.802, 0.411	0.511471	0.800709
100000257	glucuronate	Carbohydrate	Aminosugar Metabolism	0.211421	-0.447, 0.87	0.513075	0.801585
100021376	3-hydroxymargaroylglycine	Lipid	Fatty Acid Metabolism (Acyl Glycine)	0.323062	-0.692, 1.338	0.51683	0.806254
100002912	tauroursodeoxycholate	Lipid	Secondary Bile Acid Metabolism	-0.232194	-0.963, 0.499	0.517627	0.806304
100004396	3-hydroxyadipate	Lipid	Fatty Acid, Dicarboxylate	0.106022	-0.229, 0.441	0.518658	0.806716
100003001	1-(1-enyl-stearoyl)-GPE (P-18:0)*	Lipid	Lysoplasmalogen	-0.268839	-1.119, 0.581	0.519571	0.806945
100000964	alpha-glutamylglutamate	Peptide	Dipeptide	0.207565	-0.451, 0.866	0.520881	0.807787
100003196	lysylleucine	Peptide	Dipeptide	0.266503	-0.581, 1.114	0.521668	0.807819
100000924	1-oleoylglycerol (18:1)	Lipid	Monoacylglycerol	0.267685	-0.585, 1.121	0.522683	0.808202
100001039	hesperetin	Xenobiotics	Food Component/Plant	-0.471346	-1.988, 1.045	0.526569	0.810708
100009232	thioproline	Xenobiotics	Chemical	0.228136	-0.506, 0.962	0.526614	0.810708
100020849	tetrahydrocortisol sulfate (2)	Lipid	Corticosteroids	0.279138	-0.618, 1.176	0.526256	0.810708
1090	bilirubin (Z,Z)	Cofactors and Vitamins	Hemoglobin and Porphyrin Metabolism	-0.332391	-1.409, 0.744	0.529162	0.813442
100001040	1-linoleoylglycerol (18:2)	Lipid	Monoacylglycerol	0.406009	-0.918, 1.73	0.532176	0.816882
100001145	3-hydroxysebacate	Lipid	Fatty Acid, Monohydroxy	0.173485	-0.395, 0.742	0.533974	0.817259
100001204	1-methylhistamine	Amino Acid	Histidine Metabolism	-0.210672	-0.9, 0.479	0.533766	0.817259
818	malonate	Lipid	Fatty Acid Synthesis	-0.179543	-0.776, 0.417	0.539862	0.817483
1518	N-palmitoyl-sphingosine (d18:1/16:0)	Lipid	Ceramides	-0.145479	-0.631, 0.34	0.54179	0.817483
100000440	3,4-dihydroxybenzoate	Xenobiotics	Benzoate Metabolism	0.250962	-0.594, 1.096	0.544989	0.817483
100001207	4-imidazoleacetate	Amino Acid	Histidine Metabolism	-0.143943	-0.624, 0.337	0.541523	0.817483
100001396	7-methylxanthine	Xenobiotics	Xanthine Metabolism	0.339475	-0.803, 1.482	0.54472	0.817483
100001725	equol	Xenobiotics	Food Component/Plant	-0.166323	-0.724, 0.391	0.543089	0.817483
100002199	tridecenedioate (C13:1-DC)*	Lipid	Fatty Acid, Dicarboxylate	-0.590639	-2.568, 1.387	0.542708	0.817483
100006056	N-formylphenylalanine	Amino Acid	Tyrosine Metabolism	0.0863965	-0.198, 0.371	0.536341	0.817483
100006374	1,2,3-benzenetriol sulfate (2)	Xenobiotics	Chemical	-0.237666	-1.037, 0.562	0.544679	0.817483
100009056	(3'-5')-guanylyluridine	Nucleotide	Dinucleotide	0.242913	-0.568, 1.054	0.541659	0.817483
100015724	heptadecasphingosine (d17:1)	Lipid	Sphingosines	-0.303174	-1.318, 0.712	0.542598	0.817483
100019960	2-hydroxyheptanoate*	Lipid	Fatty Acid, Monohydroxy	0.195593	-0.452, 0.843	0.538267	0.817483
100020860	3-dehydrodeoxycholate	Lipid	Secondary Bile Acid Metabolism	0.245956	-0.577, 1.069	0.542293	0.817483
100021250	ginkgolic acid C13:0	Xenobiotics	Food Component/Plant	0.261688	-0.614, 1.137	0.542452	0.817483
567	nicotinate	Cofactors and Vitamins	Nicotinate and Nicotinamide Metabolism	-0.109771	-0.481, 0.262	0.547217	0.819099
100002544	4-hydroxyglutamate	Amino Acid	Glutamate Metabolism	0.247267	-0.592, 1.087	0.5484	0.819099
100008986	glutamyl-meso-diaminopimelate	Xenobiotics	Bacterial/Fungal	-0.201151	-0.884, 0.481	0.548081	0.819099
72	adenosine-2',3'-cyclic monophosphate	Nucleotide	Purine Metabolism, Adenine containing	-0.0849208	-0.376, 0.206	0.551937	0.820153
234	aspartate	Amino Acid	Alanine and Aspartate Metabolism	0.107887	-0.264, 0.48	0.554558	0.820153
275	creatinine	Amino Acid	Creatine Metabolism	0.720143	-1.754, 3.194	0.552908	0.820153
823	pyruvate	Carbohydrate	Glycolysis, Gluconeogenesis, and Pyruvate Metabolism	-0.166708	-0.739, 0.406	0.552854	0.820153
1135	ursodeoxycholate	Lipid	Secondary Bile Acid Metabolism	-0.423264	-1.876, 1.029	0.552568	0.820153
100001605	catechol sulfate	Xenobiotics	Benzoate Metabolism	-0.338885	-1.507, 0.829	0.554316	0.820153
100015831	linolenoylcarnitine (C18:3)*	Lipid	Fatty Acid Metabolism (Acyl Carnitine, Polyunsaturated)	-0.197751	-0.878, 0.483	0.553602	0.820153
800	cysteine	Amino Acid	Methionine, Cysteine, SAM and Taurine Metabolism	-0.0812419	-0.364, 0.201	0.557499	0.823095
100002122	3-hydroxyhippurate	Xenobiotics	Benzoate Metabolism	0.425634	-1.056, 1.907	0.55811	0.823095
100001990	taurocholenate sulfate*	Lipid	Secondary Bile Acid Metabolism	-0.234904	-1.055, 0.585	0.559219	0.823577
100010882	1-linolenoyl-galactosylglycerol (18:3)*	Lipid	Galactosyl Glycerolipids	-0.141992	-0.642, 0.358	0.562389	0.827089
1276	p-hydroxybenzaldehyde	Xenobiotics	Benzoate Metabolism	0.12707	-0.321, 0.575	0.563414	0.827369
100004299	N-acetyl-1-methylhistidine*	Amino Acid	Histidine Metabolism	-0.301316	-1.367, 0.764	0.564151	0.827369
100002784	2-oxoarginine*	Amino Acid	Urea cycle; Arginine and Proline Metabolism	-0.265928	-1.211, 0.68	0.566344	0.829012
100021760	N-acetyl-2-aminoadipate	Amino Acid	Lysine Metabolism	-0.131177	-0.598, 0.336	0.566846	0.829012
100008904	1-stearoyl-2-oleoyl-GPC (18:0/18:1)	Lipid	Phosphatidylcholine (PC)	-0.19403	-0.89, 0.502	0.569577	0.831851
100015723	hexadecasphingosine (d16:1)*	Lipid	Sphingosines	0.22865	-0.595, 1.053	0.571521	0.833534
100002744	8-hydroxyguanine	Nucleotide	Purine Metabolism, Guanine containing	-0.156719	-0.723, 0.41	0.572727	0.834138
212	5-methylthioadenosine (MTA)	Amino Acid	Polyamine Metabolism	-0.185527	-0.864, 0.493	0.577096	0.836206
302	deoxycholate	Lipid	Secondary Bile Acid Metabolism	0.318633	-0.847, 1.485	0.577324	0.836206
100002945	(14 or 15)-methylpalmitate (a17:0 or i17:0)	Lipid	Fatty Acid, Branched	0.224549	-0.595, 1.044	0.576259	0.836206
100009030	lactosyl-N-palmitoyl-sphingosine (d18:1/16:0)	Lipid	Lactosylceramides (LCER)	-0.199599	-0.926, 0.527	0.575502	0.836206
100001170	3-hydroxy-2-ethylpropionate	Amino Acid	Leucine, Isoleucine and Valine Metabolism	-0.300835	-1.404, 0.803	0.57822	0.836354
100000862	4-hydroxybenzoate	Xenobiotics	Benzoate Metabolism	0.306986	-0.83, 1.444	0.581946	0.840588
100001310	nicotinamide riboside	Cofactors and Vitamins	Nicotinate and Nicotinamide Metabolism	-0.244923	-1.155, 0.665	0.583063	0.841049
100021388	3-hydroxytridecanoate	Lipid	Fatty Acid, Monohydroxy	-0.117122	-0.553, 0.319	0.583908	0.841115
100000264	indole	Amino Acid	Tryptophan Metabolism	-0.189067	-0.896, 0.518	0.585633	0.842448
100000110	cadaverine	Amino Acid	Lysine Metabolism	0.341845	-0.942, 1.625	0.586938	0.843173
100021469	N-butyryl-phenylalanine	Amino Acid	Phenylalanine Metabolism	0.302773	-0.84, 1.445	0.588897	0.844834
1025	pipecolate	Amino Acid	Lysine Metabolism	-0.189255	-0.916, 0.537	0.59505	0.848414
100000718	4-ureidobutyrate	Nucleotide	Pyrimidine Metabolism, Uracil containing	0.133259	-0.38, 0.646	0.596221	0.848414
100003240	N-stearoyltaurine	Lipid	Endocannabinoid	0.130817	-0.371, 0.632	0.594676	0.848414
100005372	1-(1-enyl-oleoyl)-GPE (P-18:1)*	Lipid	Lysoplasmalogen	-0.16143	-0.783, 0.46	0.596227	0.848414
100010877	1,2-dilinolenoyl-galactosylglycerol (18:3/18:3)*	Lipid	Galactosyl Glycerolipids	0.356296	-1.003, 1.716	0.592959	0.848414
100010885	1-palmitoyl-galactosylglycerol (16:0)*	Lipid	Galactosyl Glycerolipids	-0.275998	-1.337, 0.785	0.595511	0.848414
100019761	N-palmitoyl-phytosphingosine (t18:0/16:0)	Lipid	Dihydroceramides	0.0815839	-0.234, 0.397	0.597536	0.84913
100020723	(3'-5')-adenylyladenosine*	Nucleotide	Dinucleotide	-0.246182	-1.206, 0.714	0.600831	0.852662
100006638	deoxycholic acid 3-sulfate	Lipid	Secondary Bile Acid Metabolism	-0.357666	-1.758, 1.042	0.602245	0.853519
100009062	(3'-5')-adenylylcytidine	Nucleotide	Dinucleotide	-0.247872	-1.223, 0.727	0.603863	0.854662
405	lithocholate	Lipid	Secondary Bile Acid Metabolism	-0.187925	-0.931, 0.555	0.605876	0.856358
452	palmitoleate (16:1n7)	Lipid	Long Chain Monounsaturated Fatty Acid	0.136319	-0.414, 0.686	0.613115	0.856869
561	glutamate	Amino Acid	Glutamate Metabolism	-0.0940913	-0.474, 0.286	0.613306	0.856869
828	arabinose	Carbohydrate	Pentose Metabolism	0.209172	-0.633, 1.051	0.612235	0.856869
1107	N-acetylcysteine	Amino Acid	Methionine, Cysteine, SAM and Taurine Metabolism	0.128189	-0.383, 0.639	0.608545	0.856869
100002024	5alpha-androstan-3beta,17beta-diol monosulfate (2)	Lipid	Androgenic Steroids	-0.167667	-0.844, 0.508	0.612708	0.856869
100002959	chrysoeriol (3'-O-methylluteolin)	Xenobiotics	Food Component/Plant	-0.250727	-1.261, 0.759	0.612523	0.856869
100015755	ceramide (d18:1/20:0, d16:1/22:0, d20:1/18:0)*	Lipid	Ceramides	-0.29311	-1.468, 0.882	0.610809	0.856869
100020502	sulfate of piperine metabolite C18H21NO3 (1)*	Xenobiotics	Food Component/Plant	0.256846	-0.781, 1.295	0.613561	0.856869
100021123	hydroxy-N6,N6,N6-trimethyllysine*	Amino Acid	Lysine Metabolism	-0.186482	-0.938, 0.565	0.612459	0.856869
100010927	linoleoyl-linolenoyl-glycerol (18:2/18:3) [2]*	Lipid	Diacylglycerol	-0.291428	-1.477, 0.894	0.616017	0.85916
100001132	pyroglutamylvaline	Peptide	Modified Peptides	-0.0701553	-0.359, 0.218	0.619548	0.861237
100002367	2R,3R-dihydroxybutyrate	Lipid	Fatty Acid, Dihydroxy	-0.119713	-0.612, 0.373	0.61996	0.861237
100003415	N6-methyllysine	Amino Acid	Lysine Metabolism	0.121427	-0.376, 0.619	0.618526	0.861237
100001263	1-palmitoyl-GPC (16:0)	Lipid	Lysophospholipid	-0.281447	-1.443, 0.88	0.621042	0.861603
409	malate	Energy	TCA Cycle	0.19014	-0.597, 0.978	0.622175	0.86204
100001316	nicotinate ribonucleoside	Cofactors and Vitamins	Nicotinate and Nicotinamide Metabolism	0.25583	-0.808, 1.32	0.62371	0.862571
100006095	4-hydroxycinnamate sulfate	Amino Acid	Tyrosine Metabolism	-0.14408	-0.744, 0.456	0.624197	0.862571
189	N6,N6,N6-trimethyllysine	Amino Acid	Lysine Metabolism	-0.170859	-0.892, 0.55	0.628465	0.867331
100001919	syringic acid	Xenobiotics	Food Component/Plant	0.277522	-0.898, 1.453	0.629864	0.868124
100020859	12-ketolithocholate	Lipid	Secondary Bile Acid Metabolism	0.204841	-0.666, 1.076	0.631236	0.868878
100002270	apiin	Xenobiotics	Food Component/Plant	0.167241	-0.546, 0.881	0.632446	0.869407
30	mevalonate	Lipid	Mevalonate Metabolism	-0.192524	-1.035, 0.65	0.640938	0.875065
504	serotonin	Amino Acid	Tryptophan Metabolism	0.16177	-0.557, 0.88	0.645673	0.875065
537	trans-urocanate	Amino Acid	Histidine Metabolism	0.197751	-0.679, 1.074	0.645051	0.875065
1114	3-aminoisobutyrate	Nucleotide	Pyrimidine Metabolism, Thymine containing	-0.213466	-1.163, 0.736	0.646353	0.875065
100001026	galactonate	Carbohydrate	Fructose, Mannose and Galactose Metabolism	0.146369	-0.494, 0.787	0.640805	0.875065
100001069	7-ketolithocholate	Lipid	Secondary Bile Acid Metabolism	0.323855	-1.084, 1.732	0.638676	0.875065
100001216	delta-tocopherol	Cofactors and Vitamins	Tocopherol Metabolism	-0.144713	-0.783, 0.494	0.643482	0.875065
100001392	laurylcarnitine (C12)	Lipid	Fatty Acid Metabolism (Acyl Carnitine, Medium Chain)	0.155095	-0.529, 0.84	0.643645	0.875065
100001580	docosapentaenoate (n6 DPA; 22:5n6)	Lipid	Long Chain Polyunsaturated Fatty Acid (n3 and n6)	0.205523	-0.696, 1.107	0.641794	0.875065
100001946	cyclo(gly-pro)	Peptide	Dipeptide	-0.247375	-1.324, 0.83	0.639124	0.875065
100004054	margaroylcarnitine (C17)*	Lipid	Fatty Acid Metabolism (Acyl Carnitine, Long Chain Saturated)	0.131165	-0.453, 0.715	0.646534	0.875065
100015834	lignoceroylcarnitine (C24)*	Lipid	Fatty Acid Metabolism (Acyl Carnitine, Long Chain Saturated)	-0.112384	-0.601, 0.376	0.63863	0.875065
391	citrulline	Amino Acid	Urea cycle; Arginine and Proline Metabolism	0.0672329	-0.234, 0.368	0.648402	0.876466
392	saccharopine	Amino Acid	Lysine Metabolism	-0.210001	-1.164, 0.744	0.653037	0.880142
811	alanine	Amino Acid	Alanine and Aspartate Metabolism	-0.0646458	-0.359, 0.23	0.654121	0.880142
100001570	1-linoleoyl-GPE (18:2)*	Lipid	Lysophospholipid	0.267816	-0.957, 1.493	0.655301	0.880142
100001617	undecanedioate (C11-DC)	Lipid	Fatty Acid, Dicarboxylate	-0.109924	-0.612, 0.392	0.654747	0.880142
100001999	21-hydroxypregnenolone disulfate	Lipid	Pregnenolone Steroids	0.114101	-0.408, 0.636	0.655145	0.880142
397	leucine	Amino Acid	Leucine, Isoleucine and Valine Metabolism	-0.062455	-0.353, 0.228	0.660785	0.881909
1537	1-palmitoyl-2-linoleoyl-GPC (16:0/18:2)	Lipid	Phosphatidylcholine (PC)	0.144649	-0.524, 0.813	0.658746	0.881909
100001257	N-acetylasparagine	Amino Acid	Alanine and Aspartate Metabolism	0.158209	-0.578, 0.894	0.660804	0.881909
100001527	hexanoylglycine	Lipid	Fatty Acid Metabolism (Acyl Glycine)	0.117595	-0.427, 0.662	0.65914	0.881909
100003598	tyrosylglycine	Peptide	Dipeptide	0.166156	-0.601, 0.933	0.658186	0.881909
250	biliverdin	Cofactors and Vitamins	Hemoglobin and Porphyrin Metabolism	0.157108	-0.583, 0.897	0.664507	0.885729
100000665	docosahexaenoate (DHA; 22:6n3)	Lipid	Long Chain Polyunsaturated Fatty Acid (n3 and n6)	0.262538	-0.978, 1.503	0.665547	0.885967
100001070	7,12-diketolithocholate	Lipid	Secondary Bile Acid Metabolism	-0.179062	-1.034, 0.676	0.668875	0.885967
100001221	genistein	Xenobiotics	Food Component/Plant	-0.14062	-0.813, 0.532	0.669267	0.885967
100001596	2-methylmalonylcarnitine (C4-DC)	Lipid	Fatty Acid Metabolism (also BCAA Metabolism)	-0.141174	-0.818, 0.536	0.670113	0.885967
100005972	alpha-CEHC sulfate	Cofactors and Vitamins	Tocopherol Metabolism	-0.162316	-0.942, 0.617	0.670575	0.885967
100009227	1-linoleoyl-GPG (18:2)*	Lipid	Lysophospholipid	0.210546	-0.793, 1.214	0.668296	0.885967
100015870	eicosanoylsphingosine (d20:1)*	Lipid	Sphingosines	0.169807	-0.638, 0.978	0.667776	0.885967
100010939	palmitoyl-linolenoyl-glycerol (16:0/18:3) [2]*	Lipid	Diacylglycerol	0.195673	-0.749, 1.141	0.672364	0.887217
100000013	3-hydroxybenzoate	Xenobiotics	Benzoate Metabolism	-0.239505	-1.434, 0.955	0.682031	0.887766
100000656	1-stearoyl-GPI (18:0)	Lipid	Lysophospholipid	0.225709	-0.888, 1.34	0.679013	0.887766
100001058	nicotinic acid mononucleotide (NaMN)	Cofactors and Vitamins	Nicotinate and Nicotinamide Metabolism	0.325259	-1.267, 1.918	0.676541	0.887766
100001178	3-carboxy-4-methyl-5-propyl-2-furanpropanoate (CMPF)	Lipid	Fatty Acid, Dicarboxylate	-0.112151	-0.673, 0.449	0.682897	0.887766
100001577	N-acetylcitrulline	Amino Acid	Urea cycle; Arginine and Proline Metabolism	0.14935	-0.593, 0.892	0.681258	0.887766
100002022	5alpha-androstan-3beta,17alpha-diol monosulfate (1)	Lipid	Androgenic Steroids	0.13433	-0.523, 0.792	0.676361	0.887766
100002126	16alpha-hydroxy DHEA 3-sulfate	Lipid	Androgenic Steroids	-0.154842	-0.906, 0.597	0.673876	0.887766
100004251	dimethylmalonic acid	Lipid	Fatty Acid, Dicarboxylate	-0.100485	-0.596, 0.396	0.679046	0.887766
100009028	N-palmitoyl-sphinganine (d18:0/16:0)	Lipid	Dihydroceramides	-0.111394	-0.661, 0.438	0.678801	0.887766
100021236	dehydrophytosphingosine*	Lipid	Sphingolipid Synthesis	0.192023	-0.766, 1.15	0.682212	0.887766
100021255	ginkgolic acid C17:1	Xenobiotics	Food Component/Plant	0.163757	-0.651, 0.978	0.681347	0.887766
100021475	N-butyryl-isoleucine	Amino Acid	Leucine, Isoleucine and Valine Metabolism	-0.193221	-1.147, 0.761	0.679169	0.887766
821	pseudouridine	Nucleotide	Pyrimidine Metabolism, Uracil containing	0.127224	-0.514, 0.769	0.685387	0.88777
100002356	(16 or 17)-methylstearate (a19:0 or i19:0)	Lipid	Fatty Acid, Branched	0.171432	-0.691, 1.034	0.684658	0.88777
100021093	taurochenodeoxycholic acid 3-sulfate	Lipid	Secondary Bile Acid Metabolism	-2.77556e-17	-1.68e-16, 1.12e-16	0.685429	0.88777
100002398	piperidine	Xenobiotics	Food Component/Plant	0.15668	-0.64, 0.953	0.68773	0.889656
100003064	galactosylglycerol	Lipid	Galactosyl Glycerolipids	0.152205	-0.626, 0.931	0.689662	0.891061
100001211	sebacate (C10-DC)	Lipid	Fatty Acid, Dicarboxylate	-0.118756	-0.729, 0.491	0.690986	0.891676
100006122	ribulose/xylulose	Carbohydrate	Pentose Metabolism	0.147111	-0.613, 0.907	0.692531	0.892576
100006435	N-acetylglucosamine/N-acetylgalactosamine	Carbohydrate	Aminosugar Metabolism	-0.101584	-0.629, 0.426	0.694072	0.893469
100000014	hippurate	Xenobiotics	Benzoate Metabolism	0.29774	-1.258, 1.853	0.695782	0.894576
54	1-methyladenine	Nucleotide	Purine Metabolism, Adenine containing	0.115365	-0.492, 0.723	0.698132	0.895412
100021476	N-succinyl-leucine	Amino Acid	Leucine, Isoleucine and Valine Metabolism	0.0977463	-0.417, 0.612	0.697946	0.895412
100000792	dehydroepiandrosterone sulfate (DHEA-S)	Lipid	Androgenic Steroids	-0.24559	-1.548, 1.057	0.700108	0.896853
100021712	deoxycholic acid 12-sulfate*	Lipid	Secondary Bile Acid Metabolism	0.116774	-0.509, 0.742	0.702988	0.899448
279	cystine	Amino Acid	Methionine, Cysteine, SAM and Taurine Metabolism	-0.166508	-1.077, 0.744	0.708727	0.900643
1207	phenethylamine	Amino Acid	Phenylalanine Metabolism	0.165088	-0.735, 1.065	0.707803	0.900643
100001456	7-methylguanine	Nucleotide	Purine Metabolism, Guanine containing	-0.082623	-0.535, 0.37	0.709054	0.900643
100001823	N-methylalanine	Amino Acid	Alanine and Aspartate Metabolism	0.080627	-0.356, 0.517	0.706077	0.900643
100001851	N-acetylserine	Amino Acid	Glycine, Serine and Threonine Metabolism	0.0767776	-0.341, 0.495	0.707611	0.900643
100022485	N-lactoyl valine	Amino Acid	Lactoyl Amino Acid	-0.133463	-0.86, 0.593	0.707298	0.900643
100000802	acetylcarnitine (C2)	Lipid	Fatty Acid Metabolism (Acyl Carnitine, Short Chain)	0.188138	-0.854, 1.23	0.712253	0.90253
100002619	sedoheptulose	Carbohydrate	Pentose Metabolism	-0.1575	-1.027, 0.712	0.711429	0.90253
100002018	5alpha-androstan-3alpha,17beta-diol monosulfate (1)	Lipid	Androgenic Steroids	-0.209083	-1.372, 0.954	0.713464	0.902978
100000706	alpha-hydroxyisocaproate	Amino Acid	Leucine, Isoleucine and Valine Metabolism	-0.215382	-1.429, 0.998	0.716905	0.904072
100002008	5alpha-androstan-3alpha,17alpha-diol monosulfate	Lipid	Androgenic Steroids	0.116677	-0.537, 0.77	0.715211	0.904072
100015802	urolithin B	Xenobiotics	Bacterial/Fungal	-0.133033	-0.882, 0.616	0.71682	0.904072
100020727	(3'-5')-cytidylylcytidine*	Nucleotide	Dinucleotide	0.112609	-0.525, 0.75	0.71817	0.904585
2050	eicosapentaenoate (EPA; 20:5n3)	Lipid	Long Chain Polyunsaturated Fatty Acid (n3 and n6)	-0.192075	-1.29, 0.906	0.720741	0.905085
100000454	5-aminovalerate	Amino Acid	Lysine Metabolism	0.154376	-0.732, 1.041	0.722005	0.905085
100001182	docosadienoate (22:2n6)	Lipid	Long Chain Polyunsaturated Fatty Acid (n3 and n6)	-0.22974	-1.546, 1.086	0.721287	0.905085
100001395	1-linoleoyl-GPC (18:2)	Lipid	Lysophospholipid	0.22222	-1.047, 1.491	0.720505	0.905085
100001180	2-hydroxymyristate	Lipid	Fatty Acid, Monohydroxy	-0.142815	-0.967, 0.682	0.723366	0.905712
313	sphinganine	Lipid	Sphingolipid Synthesis	0.0895574	-0.443, 0.622	0.731221	0.91105
100001472	mead acid (20:3n9)	Lipid	Long Chain Polyunsaturated Fatty Acid (n3 and n6)	0.275026	-1.349, 1.899	0.729232	0.91105
100003258	2-O-methylascorbic acid	Cofactors and Vitamins	Ascorbate and Aldarate Metabolism	-0.190135	-1.322, 0.941	0.731304	0.91105
100020546	N2-acetyl,N6-methyllysine	Amino Acid	Lysine Metabolism	0.167329	-0.831, 1.166	0.731955	0.91105
100020728	(3'-5')-cytidylyluridine*	Nucleotide	Dinucleotide	0.114787	-0.565, 0.795	0.730167	0.91105
100004509	S-allylcysteine	Xenobiotics	Food Component/Plant	0.220471	-1.101, 1.542	0.733195	0.911516
100005717	1-palmitoyl-GPG (16:0)*	Lipid	Lysophospholipid	-0.105202	-0.746, 0.536	0.73727	0.915502
100020848	tetrahydrocortisol sulfate (1)	Lipid	Corticosteroids	0.0822982	-0.421, 0.586	0.738218	0.915599
55	1-methylnicotinamide	Cofactors and Vitamins	Nicotinate and Nicotinamide Metabolism	-0.192481	-1.375, 0.99	0.739321	0.915888
100001320	erythronate*	Carbohydrate	Aminosugar Metabolism	0.0735603	-0.383, 0.53	0.741908	0.917801
100001542	ferulate	Xenobiotics	Food Component/Plant	0.140059	-0.732, 1.012	0.742608	0.917801
100004655	cyclic(AMP-GMP)	Xenobiotics	Bacterial/Fungal	-0.0495695	-0.359, 0.26	0.743711	0.918086
100000272	allo-threonine	Amino Acid	Glycine, Serine and Threonine Metabolism	0.138315	-0.749, 1.026	0.750132	0.918476
100000774	phenyllactate (PLA)	Amino Acid	Phenylalanine Metabolism	-0.166815	-1.219, 0.885	0.745837	0.918476
100001042	erythrose	Xenobiotics	Food Component/Plant	-0.116595	-0.856, 0.622	0.747071	0.918476
100001277	10-nonadecenoate (19:1n9)	Lipid	Long Chain Monounsaturated Fatty Acid	0.150791	-0.809, 1.111	0.748096	0.918476
100002749	S-methylcysteine	Amino Acid	Methionine, Cysteine, SAM and Taurine Metabolism	0.171694	-0.927, 1.27	0.749368	0.918476
100002913	ursocholate	Lipid	Secondary Bile Acid Metabolism	0.192753	-1.044, 1.43	0.750097	0.918476
100004533	valerylphenylalanine	Amino Acid	Phenylalanine Metabolism	-0.167521	-1.223, 0.888	0.745593	0.918476
172	guanine	Nucleotide	Purine Metabolism, Guanine containing	0.0910895	-0.506, 0.688	0.754996	0.918793
100001403	5-acetylamino-6-amino-3-methyluracil	Xenobiotics	Xanthine Metabolism	0.0626878	-0.344, 0.47	0.752903	0.918793
100001992	androstenediol (3beta,17beta) disulfate (1)	Lipid	Androgenic Steroids	0.151345	-0.843, 1.145	0.755627	0.918793
100002021	5alpha-androstan-3beta,17alpha-diol disulfate	Lipid	Androgenic Steroids	0.0547269	-0.304, 0.413	0.755039	0.918793
100009045	phenylacetylglutamate	Peptide	Acetylated Peptides	0.129984	-0.712, 0.972	0.752337	0.918793
100022040	N-butyryl-lysine	Amino Acid	Lysine Metabolism	-0.0561105	-0.424, 0.311	0.75495	0.918793
100002026	androstenediol (3alpha, 17alpha) monosulfate (2)	Lipid	Androgenic Steroids	0.110937	-0.621, 0.842	0.756538	0.918841
100002014	5alpha-pregnan-3beta,20alpha-diol monosulfate (2)	Lipid	Progestin Steroids	0.105446	-0.597, 0.808	0.758839	0.920573
100003589	phenylalanylalanine	Peptide	Dipeptide	-0.0907074	-0.7, 0.518	0.760704	0.920714
100004056	N-methyltaurine	Amino Acid	Methionine, Cysteine, SAM and Taurine Metabolism	-0.0863013	-0.665, 0.492	0.760307	0.920714
213	N6-methyladenosine	Nucleotide	Purine Metabolism, Adenine containing	0.113213	-0.667, 0.893	0.766616	0.920932
917	asparagine	Amino Acid	Alanine and Aspartate Metabolism	-0.0976812	-0.773, 0.578	0.767531	0.920932
100001073	androsterone sulfate	Lipid	Androgenic Steroids	-0.155434	-1.218, 0.907	0.764903	0.920932
100001586	gulonate*	Cofactors and Vitamins	Ascorbate and Aldarate Metabolism	-0.197899	-1.534, 1.138	0.762101	0.920932
100001994	androstenediol (3beta,17beta) disulfate (2)	Lipid	Androgenic Steroids	0.136295	-0.803, 1.076	0.766852	0.920932
100019968	lyxonate	Carbohydrate	Pentose Metabolism	-0.140417	-1.113, 0.832	0.76788	0.920932
100020822	dihydrocaffeate sulfate (2)	Xenobiotics	Food Component/Plant	-0.25857	-2.031, 1.513	0.765474	0.920932
100022008	bilirubin degradation product, C17H20N2O5 (1)**	Partially Characterized Molecules	Partially Characterized Molecules	0.11263	-0.661, 0.886	0.765902	0.920932
100003674	prolylglycine	Peptide	Dipeptide	0.0944267	-0.566, 0.755	0.770038	0.922469
1140	gamma-glutamylglutamine	Peptide	Gamma-glutamyl Amino Acid	-0.0965417	-0.78, 0.587	0.772775	0.923646
100019893	3-hydroxyarachidate*	Lipid	Fatty Acid, Monohydroxy	0.184723	-1.12, 1.489	0.772184	0.923646
100001175	1,3-propanediol	Xenobiotics	Chemical	-0.131282	-1.067, 0.805	0.774255	0.924365
827	cytidine	Nucleotide	Pyrimidine Metabolism, Cytidine containing	-0.0925358	-0.766, 0.581	0.778808	0.92665
100000715	1-methylguanidine	Amino Acid	Guanidino and Acetamido Metabolism	0.0624535	-0.391, 0.516	0.778119	0.92665
100009256	steviol	Xenobiotics	Food Component/Plant	0.181985	-1.135, 1.499	0.777587	0.92665
100019886	valerylhistidine*	Peptide	Dipeptide	-0.0911173	-0.769, 0.587	0.783435	0.931103
1310	nicotinamide adenine dinucleotide (NAD+)	Cofactors and Vitamins	Nicotinate and Nicotinamide Metabolism	0.116339	-0.784, 1.016	0.791536	0.934403
100000467	3-indoxyl sulfate	Amino Acid	Tryptophan Metabolism	0.114817	-0.763, 0.993	0.78911	0.934403
100000787	N-acetylaspartate (NAA)	Amino Acid	Alanine and Aspartate Metabolism	0.0987305	-0.656, 0.854	0.789131	0.934403
100005389	ferulic acid 4-sulfate	Xenobiotics	Food Component/Plant	-0.16152	-1.404, 1.081	0.790465	0.934403
100009394	hexadecadienoate (16:2n6)	Lipid	Long Chain Polyunsaturated Fatty Acid (n3 and n6)	0.0768786	-0.507, 0.66	0.787588	0.934403
100022004	bilirubin degradation product, C16H18N2O5 (2)**	Partially Characterized Molecules	Partially Characterized Molecules	0.0966012	-0.65, 0.843	0.791337	0.934403
100001022	threonate	Cofactors and Vitamins	Ascorbate and Aldarate Metabolism	-0.0829247	-0.739, 0.573	0.796084	0.938719
100002017	5alpha-androstan-3alpha,17beta-diol disulfate	Lipid	Androgenic Steroids	0.08867	-0.628, 0.805	0.800151	0.94155
100021873	1-deoxysphinganine (m18:0)	Lipid	Sphingolipid Synthesis	0.0614162	-0.435, 0.558	0.800272	0.94155
100002488	isoursodeoxycholate	Lipid	Secondary Bile Acid Metabolism	-0.106789	-0.978, 0.764	0.802057	0.942596
100001989	glycocholenate sulfate*	Lipid	Secondary Bile Acid Metabolism	-0.143377	-1.332, 1.045	0.805105	0.945123
1268	gamma-glutamylleucine	Peptide	Gamma-glutamyl Amino Acid	-0.0476344	-0.455, 0.36	0.811186	0.94804
100002009	5alpha-pregnan-3beta,20beta-diol monosulfate (1)	Lipid	Progestin Steroids	0.122578	-0.92, 1.166	0.810072	0.94804
100005829	N-myristoyltaurine*	Lipid	Endocannabinoid	0.0193623	-0.146, 0.185	0.810806	0.94804
100020724	(3'-5')-adenylylguanosine*	Nucleotide	Dinucleotide	-0.0977669	-0.935, 0.739	0.811191	0.94804
100001718	2,4,6-trihydroxybenzoate	Xenobiotics	Benzoate Metabolism	-0.0707727	-0.684, 0.542	0.813317	0.948419
100003432	dihydroferulate	Xenobiotics	Food Component/Plant	0.13703	-1.045, 1.319	0.812649	0.948419
100001411	beta-guanidinopropanoate	Xenobiotics	Food Component/Plant	-0.0757179	-0.747, 0.596	0.817664	0.952434
100006372	gentisic acid-5-glucoside	Xenobiotics	Chemical	-0.0875376	-0.876, 0.701	0.820435	0.953552
100020272	dihydroferulic acid sulfate	Xenobiotics	Food Component/Plant	0.160367	-1.282, 1.602	0.82008	0.953552
100015744	ceramide (d18:2/24:1, d18:1/24:2)*	Lipid	Ceramides	0.0821301	-0.67, 0.835	0.823377	0.955916
171	hypoxanthine	Nucleotide	Purine Metabolism, (Hypo)Xanthine/Inosine containing	-0.052386	-0.54, 0.436	0.82623	0.957117
100000657	1,2-dipalmitoyl-GPC (16:0/16:0)	Lipid	Phosphatidylcholine (PC)	-0.0983491	-1.013, 0.816	0.825946	0.957117
100002451	dihydrocaffeate	Xenobiotics	Food Component/Plant	-0.148449	-1.545, 1.249	0.827944	0.95805
100015732	N-pentadecanoyl-sphingosine (d18:1/15:0)*	Lipid	Ceramides	-0.115929	-1.214, 0.983	0.829103	0.958337
100004216	pterin	Cofactors and Vitamins	Pterin Metabolism	-0.0670925	-0.71, 0.576	0.831064	0.959551
98	kynurenate	Amino Acid	Tryptophan Metabolism	-0.0738141	-0.828, 0.68	0.84124	0.961991
432	nicotinamide	Cofactors and Vitamins	Nicotinate and Nicotinamide Metabolism	0.055955	-0.503, 0.615	0.837757	0.961991
469	phytosphingosine	Lipid	Sphingolipid Synthesis	-0.0589403	-0.668, 0.55	0.842991	0.961991
880	adenine	Nucleotide	Purine Metabolism, Adenine containing	0.0400632	-0.375, 0.455	0.843535	0.961991
1084	N-acetylvaline	Amino Acid	Leucine, Isoleucine and Valine Metabolism	-0.0747545	-0.828, 0.678	0.839115	0.961991
100000776	palmitoylcarnitine (C16)	Lipid	Fatty Acid Metabolism (Acyl Carnitine, Long Chain Saturated)	0.0897615	-0.857, 1.036	0.846178	0.961991
100001279	hyocholate	Lipid	Secondary Bile Acid Metabolism	0.0717349	-0.681, 0.824	0.845426	0.961991
100002023	5alpha-androstan-3beta,17beta-diol monosulfate (1)	Lipid	Androgenic Steroids	0.0814071	-0.73, 0.893	0.837428	0.961991
100002128	17alpha-hydroxypregnenolone 3-sulfate	Lipid	Pregnenolone Steroids	0.0786082	-0.721, 0.878	0.840646	0.961991
100002261	tribuloside	Xenobiotics	Food Component/Plant	-0.0216474	-0.249, 0.205	0.84526	0.961991
100002376	dexpanthenol	Xenobiotics	Chemical	-0.0785883	-0.911, 0.754	0.846881	0.961991
100004059	histidine betaine (hercynine)*	Xenobiotics	Food Component/Plant	-0.149888	-1.635, 1.336	0.836507	0.961991
100019888	valeryltryptophan*	Amino Acid	Tryptophan Metabolism	0.0609014	-0.535, 0.657	0.834462	0.961991
100021065	lactobacillic acid	Xenobiotics	Bacterial/Fungal	-0.0790459	-0.859, 0.701	0.835887	0.961991
100021650	chenodeoxycholic acid sulfate (1)	Lipid	Primary Bile Acid Metabolism	0.149821	-1.43, 1.729	0.846157	0.961991
100000934	digalacturonic acid	Xenobiotics	Food Component/Plant	0.109559	-1.067, 1.286	0.848961	0.962902
100001507	4-hydroxybutyrate (GHB)	Lipid	Fatty Acid, Monohydroxy	0.0648269	-0.634, 0.764	0.849512	0.962902
100010873	1,2-dilinoleoyl-digalactosylglycerol (18:2/18:2)*	Lipid	Galactosyl Glycerolipids	-0.104017	-1.238, 1.03	0.851134	0.963704
100003678	prolylproline	Peptide	Dipeptide	-0.0656886	-0.793, 0.662	0.853437	0.965273
1004	xanthine	Nucleotide	Purine Metabolism, (Hypo)Xanthine/Inosine containing	-0.0615321	-0.758, 0.635	0.856673	0.965821
100004049	3-methylurate*	Xenobiotics	Xanthine Metabolism	0.0459319	-0.471, 0.563	0.855821	0.965821
100020993	cyclo(his-pro) (D,L)*	Peptide	Dipeptide	-0.0334446	-0.41, 0.344	0.856012	0.965821
192	N-acetylputrescine	Amino Acid	Polyamine Metabolism	0.0773717	-0.845, 1.0	0.86382	0.972031
100001386	heme	Cofactors and Vitamins	Hemoglobin and Porphyrin Metabolism	0.0390879	-0.432, 0.51	0.865237	0.972031
100021071	vitamin D3 sulfate	Cofactors and Vitamins	Vitamin D Metabolism	-0.0350805	-0.46, 0.39	0.865797	0.972031
100022610	ceramide (d18:2/16:0, d18:1/16:1, d16:1/18:1)*	Lipid	Ceramides	0.0513787	-0.571, 0.674	0.865874	0.972031
115	3-hydroxypropanoate	Lipid	Fatty Acid, Monohydroxy	-0.0864088	-1.163, 0.99	0.869574	0.973073
100001359	aconitate [cis or trans]	Energy	TCA Cycle	0.0739088	-0.845, 0.993	0.869295	0.973073
100021103	pregnenetriol sulfate*	Lipid	Pregnenolone Steroids	-0.0896223	-1.2, 1.021	0.868863	0.973073
799	betaine	Amino Acid	Glycine, Serine and Threonine Metabolism	-0.0768822	-1.062, 0.908	0.873163	0.974665
881	cytosine	Nucleotide	Pyrimidine Metabolism, Cytidine containing	-0.0354446	-0.492, 0.421	0.873911	0.974665
1162	N-acetylneuraminate	Carbohydrate	Aminosugar Metabolism	-0.0733023	-1.039, 0.893	0.87662	0.974665
100000920	naringenin	Xenobiotics	Food Component/Plant	-0.110237	-1.587, 1.366	0.878602	0.974665
100000963	homocitrulline	Amino Acid	Urea cycle; Arginine and Proline Metabolism	-0.0476969	-0.683, 0.587	0.877894	0.974665
100001615	octadecanedioate (C18-DC)	Lipid	Fatty Acid, Dicarboxylate	0.0788308	-0.997, 1.154	0.880793	0.974665
100004499	6-oxopiperidine-2-carboxylate	Amino Acid	Lysine Metabolism	-0.042192	-0.595, 0.511	0.875942	0.974665
100009337	caffeic acid sulfate	Xenobiotics	Food Component/Plant	0.126627	-1.62, 1.873	0.882104	0.974665
100009393	hexadecatrienoate (16:3n3)	Lipid	Long Chain Polyunsaturated Fatty Acid (n3 and n6)	-0.100453	-1.478, 1.277	0.881394	0.974665
100010895	2'-O-methylcytidine	Nucleotide	Pyrimidine Metabolism, Cytidine containing	-0.0514637	-0.752, 0.65	0.880612	0.974665
100010944	oleoyl-linolenoyl-glycerol (18:1/18:3) [2]*	Lipid	Diacylglycerol	-0.102506	-1.493, 1.288	0.880156	0.974665
100020214	glyco-beta-muricholate**	Lipid	Primary Bile Acid Metabolism	-0.0343889	-0.481, 0.412	0.874846	0.974665
100002285	2,4-dihydroxybutyrate	Lipid	Fatty Acid, Dihydroxy	-0.0484187	-0.726, 0.629	0.883686	0.975389
73	cytidine 2',3'-cyclic monophosphate	Nucleotide	Pyrimidine Metabolism, Cytidine containing	-0.0498487	-0.767, 0.667	0.886938	0.977475
100001492	diacetylchitobiose	Carbohydrate	Aminosugar Metabolism	-0.0507418	-0.784, 0.683	0.887432	0.977475
100020204	N-acetyl-2-aminooctanoate*	Lipid	Fatty Acid, Amino	-0.0473448	-0.742, 0.647	0.889129	0.97832
100009325	3-carboxyadipate	Lipid	Fatty Acid, Dicarboxylate	0.0388753	-0.544, 0.621	0.891377	0.97977
100000809	6-hydroxynicotinate	Cofactors and Vitamins	Nicotinate and Nicotinamide Metabolism	0.0330126	-0.477, 0.543	0.894572	0.982257
563	glutamine	Amino Acid	Glutamate Metabolism	0.0214821	-0.321, 0.364	0.897835	0.98393
100001267	piperine	Xenobiotics	Food Component/Plant	0.11476	-1.716, 1.946	0.897964	0.98393
62	12,13-DiHOME	Lipid	Fatty Acid, Dihydroxy	0.0600852	-0.972, 1.092	0.905179	0.984855
75	uridine-2',3'-cyclic monophosphate	Nucleotide	Pyrimidine Metabolism, Uracil containing	0.0456203	-0.79, 0.881	0.911044	0.984855
229	arachidonate (20:4n6)	Lipid	Long Chain Polyunsaturated Fatty Acid (n3 and n6)	0.0605643	-1.019, 1.14	0.90861	0.984855
418	methylmalonate (MMA)	Lipid	Fatty Acid Metabolism (also BCAA Metabolism)	-0.035389	-0.786, 0.715	0.923109	0.984855
566	valine	Amino Acid	Leucine, Isoleucine and Valine Metabolism	-0.0256572	-0.497, 0.446	0.911353	0.984855
803	mannose	Carbohydrate	Fructose, Mannose and Galactose Metabolism	-0.0345213	-0.739, 0.67	0.920131	0.984855
1002	allantoin	Nucleotide	Purine Metabolism, (Hypo)Xanthine/Inosine containing	-0.0757564	-1.368, 1.217	0.904542	0.984855
100000873	galacturonate	Xenobiotics	Food Component/Plant	-0.0403516	-0.894, 0.813	0.922925	0.984855
100001510	phenol sulfate	Amino Acid	Tyrosine Metabolism	0.0511672	-1.005, 1.107	0.921022	0.984855
100001540	glutamine_degradant*	Partially Characterized Molecules	Partially Characterized Molecules	-0.0324635	-0.658, 0.593	0.915411	0.984855
100001675	4-hydroxycinnamate	Xenobiotics	Food Component/Plant	0.0305866	-0.613, 0.674	0.922551	0.984855
100001789	sucralose	Xenobiotics	Food Component/Plant	0.0650795	-1.178, 1.308	0.914711	0.984855
100002313	oleanolate	Xenobiotics	Food Component/Plant	-0.0800096	-1.697, 1.537	0.919339	0.984855
100002459	3-hydroxyvalerate	Lipid	Fatty Acid, Monohydroxy	0.0468343	-0.752, 0.846	0.904554	0.984855
100002745	cyclo(his-pro)	Peptide	Dipeptide	0.0357018	-0.583, 0.654	0.905969	0.984855
100003425	cis-urocanate	Amino Acid	Histidine Metabolism	0.0208555	-0.422, 0.464	0.923229	0.984855
100004561	N-formylanthranilic acid	Amino Acid	Tryptophan Metabolism	0.0386028	-0.596, 0.673	0.900932	0.984855
100009233	palmitoylcholine	Lipid	Fatty Acid Metabolism (Acyl Choline)	-0.0659249	-1.324, 1.192	0.914616	0.984855
100009343	1-linoleoyl-2-linolenoyl-GPC (18:2/18:3)*	Lipid	Phosphatidylcholine (PC)	-0.0265935	-0.546, 0.493	0.916559	0.984855
100010933	linolenoyl-linolenoyl-glycerol (18:3/18:3) [2]*	Lipid	Diacylglycerol	0.0791514	-1.356, 1.515	0.910179	0.984855
100019801	3-hydroxyoleoylcarnitine	Lipid	Fatty Acid Metabolism (Acyl Carnitine, Hydroxy)	-0.0383445	-0.767, 0.691	0.914294	0.984855
100020480	gamma-CEHC sulfate	Cofactors and Vitamins	Tocopherol Metabolism	0.030654	-0.627, 0.689	0.924062	0.984855
100020547	21-hydroxypregnanolone monosulfate (1)	Lipid	Pregnenolone Steroids	-0.0440689	-0.824, 0.736	0.908018	0.984855
100020550	deoxycholic acid glucuronide	Lipid	Secondary Bile Acid Metabolism	0.0461309	-0.832, 0.925	0.914433	0.984855
100020696	2-palmitoyl-galactosylglycerol (16:0)*	Lipid	Galactosyl Glycerolipids	-0.0659371	-1.189, 1.057	0.904405	0.984855
100020725	(3'-5')-guanylyladenosine*	Nucleotide	Dinucleotide	-0.0332741	-0.686, 0.62	0.916983	0.984855
100021471	N-isobutyryl-phenylalanine	Amino Acid	Phenylalanine Metabolism	0.0457821	-0.834, 0.926	0.915243	0.984855
327	flavin adenine dinucleotide (FAD)	Cofactors and Vitamins	Riboflavin Metabolism	-0.0275768	-0.632, 0.577	0.925607	0.985505
1123	chenodeoxycholate	Lipid	Primary Bile Acid Metabolism	-0.0757918	-1.954, 1.802	0.934196	0.990493
100000445	theobromine	Xenobiotics	Xanthine Metabolism	-0.0469511	-1.17, 1.076	0.931854	0.990493
100001262	gamma-glutamyl-epsilon-lysine	Peptide	Gamma-glutamyl Amino Acid	0.0262829	-0.633, 0.686	0.934996	0.990493
100001956	N-methylproline	Amino Acid	Urea cycle; Arginine and Proline Metabolism	0.0425649	-0.998, 1.083	0.933302	0.990493
100003434	imidazole propionate	Amino Acid	Histidine Metabolism	0.0525102	-1.222, 1.327	0.932817	0.990493
100001768	N6-carboxymethyllysine	Carbohydrate	Advanced Glycation End-product	0.0215095	-0.532, 0.575	0.936649	0.991247
100001888	alanylproline	Peptide	Dipeptide	0.0148656	-0.376, 0.406	0.937965	0.99127
100021474	N-butyryl-leucine	Amino Acid	Leucine, Isoleucine and Valine Metabolism	0.0329401	-0.841, 0.907	0.938553	0.99127
100005999	7-hydroxycholesterol (alpha or beta)	Lipid	Sterol	0.0247561	-0.677, 0.727	0.942466	0.994405
1748	dopamine	Amino Acid	Tyrosine Metabolism	0.0300465	-0.917, 0.977	0.948238	0.994516
100000491	gamma-glutamylphenylalanine	Peptide	Gamma-glutamyl Amino Acid	0.015205	-0.455, 0.486	0.947289	0.994516
100000976	glycylproline	Peptide	Dipeptide	0.0155713	-0.475, 0.506	0.948223	0.994516
100001541	2-hydroxy-3-methylvalerate	Amino Acid	Leucine, Isoleucine and Valine Metabolism	0.0355558	-1.003, 1.075	0.944175	0.994516
100006430	arabitol/xylitol	Carbohydrate	Pentose Metabolism	-0.031558	-1.009, 0.946	0.947335	0.994516
100019972	dodecenedioate (C12:1-DC)*	Lipid	Fatty Acid, Dicarboxylate	-0.0194298	-0.602, 0.564	0.945633	0.994516
355	histidine	Amino Acid	Histidine Metabolism	-0.0114756	-0.388, 0.365	0.950273	0.994681
878	fructose	Carbohydrate	Fructose, Mannose and Galactose Metabolism	0.0195297	-0.765, 0.804	0.959388	0.994681
1052	glycerate	Carbohydrate	Glycolysis, Gluconeogenesis, and Pyruvate Metabolism	-0.0137715	-0.564, 0.537	0.95918	0.994681
100001569	1-oleoyl-GPE (18:1)	Lipid	Lysophospholipid	0.0215143	-0.85, 0.893	0.95973	0.994681
100001634	vanillate	Xenobiotics	Food Component/Plant	-0.0268863	-0.959, 0.905	0.952943	0.994681
100002254	stearoyl ethanolamide	Lipid	Endocannabinoid	-0.0161616	-0.615, 0.583	0.955957	0.994681
100005818	N-acetyl-S-allyl-cysteine	Xenobiotics	Food Component/Plant	-0.0154971	-0.641, 0.61	0.959536	0.994681
100020823	lithocholate sulfate (1)	Lipid	Secondary Bile Acid Metabolism	-0.0242969	-0.912, 0.863	0.955337	0.994681
100021052	carboxymethylarginine	Amino Acid	Urea cycle; Arginine and Proline Metabolism	0.0133786	-0.453, 0.479	0.953161	0.994681
100021104	pregnenetriol disulfate*	Lipid	Pregnenolone Steroids	-0.0322414	-1.225, 1.16	0.955885	0.994681
100021477	N-succinyl-isoleucine	Amino Acid	Leucine, Isoleucine and Valine Metabolism	-0.017168	-0.688, 0.654	0.958242	0.994681
100021656	val-val-ala	Peptide	Polypeptide	0.0153945	-0.53, 0.56	0.953907	0.994681
144	4-hydroxyphenylacetate	Amino Acid	Phenylalanine Metabolism	0.0175711	-0.796, 0.831	0.964741	0.997954
100001730	3,4-dihydroxybutyrate	Lipid	Fatty Acid, Dihydroxy	0.011459	-0.534, 0.557	0.965732	0.997954
100009204	1,2-dipalmitoyl-GPE (16:0/16:0)*	Lipid	Phosphatidylethanolamine (PE)	-0.0100743	-0.481, 0.461	0.965085	0.997954
519	myristate (14:0)	Lipid	Long Chain Saturated Fatty Acid	-0.0123451	-0.76, 0.735	0.973034	0.998892
100001081	2-pyrrolidinone	Amino Acid	Glutamate Metabolism	-0.010945	-0.662, 0.64	0.972565	0.998892
100001623	3-(2-hydroxyphenyl)propionate	Xenobiotics	Benzoate Metabolism	0.0099895	-0.529, 0.549	0.969746	0.998892
100003493	tyrosol	Amino Acid	Tyrosine Metabolism	0.00870445	-0.53, 0.548	0.973641	0.998892
100008929	2-methylcitrate/homocitrate	Energy	TCA Cycle	-0.00812853	-0.423, 0.407	0.968038	0.998892
100009406	palmitoleoylcarnitine (C16:1)*	Lipid	Fatty Acid Metabolism (Acyl Carnitine, Monounsaturated)	0.0149051	-0.874, 0.904	0.972637	0.998892
100016115	1-palmitoyl-sulfoquinovopyranosyl-glycerol (16:0)*	Lipid	Monoacylglycerol	-0.0122287	-0.787, 0.762	0.974228	0.998892
100020495	sulfate of piperine metabolite C16H19NO3 (1)*	Xenobiotics	Food Component/Plant	-0.00873075	-0.558, 0.541	0.974062	0.998892
100001033	beta-sitosterol	Lipid	Sterol	0.0101844	-0.766, 0.787	0.978584	0.999466
100001270	myristoylcarnitine (C14)	Lipid	Fatty Acid Metabolism (Acyl Carnitine, Long Chain Saturated)	0.013031	-0.975, 1.001	0.978473	0.999466
100001435	1-linolenoylglycerol (18:3)	Lipid	Monoacylglycerol	-0.0160129	-1.103, 1.071	0.975948	0.999466
100020241	gamma-glutamylcitrulline*	Peptide	Gamma-glutamyl Amino Acid	-0.0122763	-0.9, 0.876	0.977433	0.999466
100001034	indoleacetate	Amino Acid	Tryptophan Metabolism	0.00989562	-0.781, 0.801	0.979574	0.999507
330	fumarate	Energy	TCA Cycle	0.000539177	-0.602, 0.603	0.998539	1
354	histamine	Amino Acid	Histidine Metabolism	-0.00318124	-1.156, 1.15	0.995495	1
565	tryptophan	Amino Acid	Tryptophan Metabolism	-0.00257141	-0.394, 0.389	0.989274	1
1648	taurocholate	Lipid	Primary Bile Acid Metabolism	-0.00151686	-1.101, 1.098	0.997748	1
100000011	phenylacetate	Amino Acid	Phenylalanine Metabolism	-0.0055001	-0.697, 0.686	0.987023	1
100000453	paraxanthine	Xenobiotics	Xanthine Metabolism	0.00307196	-0.929, 0.935	0.994616	1
100001006	N-acetylglycine	Amino Acid	Glycine, Serine and Threonine Metabolism	0.00453712	-0.687, 0.696	0.989287	1
100001399	1,7-dimethylurate	Xenobiotics	Xanthine Metabolism	-0.0162808	-1.543, 1.51	0.98259	1
100001579	2-hydroxypalmitate	Lipid	Fatty Acid, Monohydroxy	0.00646806	-0.857, 0.87	0.987768	1
100001993	pregnenediol disulfate (C21H34O8S2)*	Lipid	Pregnenolone Steroids	-0.00596956	-0.759, 0.747	0.987056	1
100002082	norvaline	Amino Acid	Urea cycle; Arginine and Proline Metabolism	0.00165612	-1.425, 1.428	0.998104	1
100002500	formiminoglutamate	Amino Acid	Histidine Metabolism	-0.00276366	-0.665, 0.659	0.993182	1
100002613	pantoate	Cofactors and Vitamins	Pantothenate and CoA Metabolism	0.00333851	-0.787, 0.793	0.993101	1
100003760	phenylacetylphenylalanine	Peptide	Acetylated Peptides	-0.00514117	-0.799, 0.789	0.989429	1
100005466	N-acetyltaurine	Amino Acid	Methionine, Cysteine, SAM and Taurine Metabolism	-0.0021713	-0.803, 0.799	0.995573	1
100009342	STVLT	Peptide	Polypeptide	0	-7.34e-16, 7.34e-16	1	1
100010932	linolenoyl-linolenoyl-glycerol (18:3/18:3) [1]*	Lipid	Diacylglycerol	0.00201496	-0.478, 0.482	0.993146	1
100015865	hexadecasphinganine (d16:0)*	Lipid	Sphingolipid Synthesis	-0.0045019	-0.488, 0.479	0.984793	1
100020227	pyroglutamylalanine*	Peptide	Modified Peptides	0.00163811	-0.464, 0.468	0.994261	1
100020361	3-amino-2-piperidone	Amino Acid	Urea cycle; Arginine and Proline Metabolism	-0.00796789	-1.075, 1.059	0.987808	1
100020973	5-hydroxy-2-methylpyridine sulfate	Xenobiotics	Chemical	0	0, 0		1
