# Supplementary material for: Cholesterol-lowering effects of oats induced by microbially produced phenolic metabolites
Source: Research Square preprint supplement (doi:10.21203/rs.3.rs-4188074/v1), 2024-07-16
Supplement: Supplementary file 7 [file d202ad82ee95b0355389162e.xlsx]

## Sheet: Supplementary Table S1-1
Supplementary Table S1: Metabolic characteristics of the subject at baseline
	Total (n = 32)	CG (n = 15)	OG (n = 17)	P
Anthropometrics
Weight, kg	94.1 ± 12.2	97.3 ± 12.8	91.2 ± 11.2	0.158
BMI, kg/m²	32.0 ± 3.3	32.8 ± 3.6	31.3 ± 2.9	0.211
WC, cm	106.6 ± 9.4	111.0 ± 8.8	102.8 ± 8.3	0.012*
WHtR	0.62 ± 0.05	0.65 ± 0.06	0.60 ± 0.09	0.020*
Body fat, %	38.9 (10.6)	36.6 (10.7)	40.1 (10.9)	0.906
REE, kcal/da	1,834 ± 287	1,937 ± 309	1,738 ± 235	0.052
SBP, mmHg	143.3 ± 15.0	148.5 ± 18.3	138.7 ± 9.7	0.077
DBP, mmHg	93.9 ± 12.1	93.9 ± 16.2	93.8 ± 7.2	0.987
Pulse, beats/min	62.3 (11.8)	63.0 (16.3)	62.0 (8.5)	0.439
Lipid metabolism
TC, mg/dL	223.1 ± 51.2	205.3 ± 30.6	238.8 ± 60.8	0.056
LDL-C, mg/dL	153.4 ± 44.1	135.9 ± 28.6	168.9 ± 50.1	0.028*
HDL-C, mg/dL	50.3 ± 9.8	48.9 ± 7.9	51.5 ± 11.3	0.463
TG, mg/dL	152.5 (65)	153.0 (97.0)	152.0 (49.0)	0.972
NEFAs, mmol/L	0.69 (0.38)	0.67 (0.54)	0.70 (0.29)	0.943
Lipase, U/L	35.6 ± 9.1	35.6 ± 8.3	35.6 ± 10.1	0.997
Bilirubin, mg/dL	0.58 (0.26)	0.58 (0.18)	0.51 (0.41)	0.544
γ-GT, U/L	30.0 (42.5)	38.0 (68.0)	29.0 (26.0)	0.356
ALT, U/L	31.3 ± 13.2	38.0 ± 15.2	25.5 ± 7.7	0.005**
AST, U/L	25.0 (13.8)	30.0 (13.0)	19.0 (9.5)	0.031*
Glucose metabolism
Glucose, mg/dL	98.7 ± 10.0	99.5 ± 10.4	98.0 ± 9.8	0.685
Insulin, mU/L	15.8 (11.9)	18.4 (10.6)	14.1 (11.7)	0.356
HOMA-IR	3.9 (3.1)	4.1 (2.3)	3.3 (.7)	0.348
HbA1c, %	5.6 ± 0.3	5.5 ± 0.2	5.5 ± 0.3	0.95
hsCRP, mg/dL	2.22 (2.95)	1.8 (3.4)	2.3 (2.9)	0.463
Kidney function
Creatinine, mg/dL	0.82 (0.25)	0.84 (0.19)	0.80 (0.26)	0.999
GFR, mL/min	86.5 ± 13.9	88.2 ± 9.7	85.0 ± 16.9	0.513
Urea, mg/dL	30.3 (12.0)	30.7 (13.7)	29.8 (11.5)	0.843
Uric acid, mg/dL	6.1 ± 1.3	6.3 ± 1.2	5.9 ± 1.4	0.396
Data are presented as mean ± SD or median (IQR) depending on data distribution . P-values refer to unpaired student`s t-test (or Mann-Whitney-U test). Abbreviations: ALT; alanine transaminase; AST, aspartate transaminase; BMI, body mass index; DBP, diastolic blood pressure; GFR, glomerular filtration rate; HbA1c, glycated hemoglobin; HDL, high-density lipoprotein; HOMA-IR, homeostasis model asses…

## Sheet: Supplementary Table S1-2
Supplementary Table S2: Habitual diet assessed with food frequency questionnaire (FFQ)
	Total (n = 32)	CG (n = 15)	OG (n = 17)	P
Total energy, kcal/d	2,050 (905)	2,099 (1,549)	1,964 (769)	0.357
Total protein, g/d	77.2 (34.22)	79.7 (39.4)	76.9 (32.3)	0.163
Total fat, g/d	102.9 ± 32.1	110.2 ± 37.9	96.5 ± 25.5	0.235
Total CH, g/d	176.0 (112.2)	207.6 (131.3)	172.1 (82.7)	0.478
Total fiber, g/d	18.8 (8.1)	18.8 (10.1)	18.8 (6.6)	0.289
Energy%
Protein	15.3 ± 2.4	15.4 ± 2.4	15.2 ± 2.5	0.796
Fat	42.7 ± 5.5	42.7 ± 6.5	42.6 ± 4.6	0.628
CH	37.7 ± 5.6	37.7 ± 6.9	37.7 ± 4.2	0.495
Data are presented as mean ± SD or median (IQR) depending on data distribution. P-values refer to unpaired student`s t-test (or Mann-Whitney-U test). Abbreviations: CH, carbohydrates
